# Supplementary material for: Label-Free Quantitative Thermal Proteome Profiling Reveals Target Transcription Factors with Activities Modulated by MC3R Signaling
Source: Anal Chem. 2023 Oct 7;95(41):15400–8. doi: 10.1021/acs.analchem.3c03643 (PMC10585664; doi:10.1021/acs.analchem.3c03643)
Supplement: Supplementary file 4 — ac3c03643_si_003.xlsx [file ac3c03643_si_003.xlsx]

## Sheet: TOP3 quantification
									QC	QC	QC	QC	QC	QC	QC	QC	QC	QC	QC	QC	QC	QC	QC	QC	QC	QC	QC	QC	QC	Standard	Standard	QC	QC	Standard	Standard	Standard	Standard	QC	Standard	Standard	QC	QC	Standard	Standard	QC	Standard	Standard	QC	Standard
description	IEP	mw	max score	accession	reported peptides	sequence coverage	FDR level	entry	DMSO_37 1	DMSO_37 2	DMSO_37 3	DMSO_42 1	DMSO_42 2	DMSO_42 3	DMSO_47 1	DMSO_47 2	DMSO_47 3	DMSO_52 1	DMSO_52 2	DMSO_52 3	DMSO_57 1	DMSO_57 2	DMSO_57 3	DMSO_62 1	DMSO_62 2	DMSO_62 3	DMSO_67 1	DMSO_67 2	DMSO_67 3	20alpha_37 1	20alpha_37 2	20alpha_37 3	20alpha_42 1	20alpha_42 2	20alpha_42 3	20alpha_47 1	20alpha_47 2	20alpha_47 3	20alpha_52 1	20alpha_52 2	20alpha_52 3	20alpha_57 1	20alpha_57 2	20alpha_57 3	20alpha_62 1	20alpha_62 2	20alpha_62 3	20alpha_67 1	20alpha_67 2
Alpha-enolase OS=Homo sapiens OX=9606 GN=ENO1 PE=1 SV=2	7.19	47511.2	80054.9	P06733	31	72.58	0	ENOA_HUMAN	312604	311819	276741	324274	327561	318332	313968	306701	330194	310227	328834	317317	276933	306565	310512	199778	196113	214258	166760	169220	210073	326286	340148	374157	336259	272975	299708	314029	299617	341424	310517	375972	362040	369398	353171	252671	309536	410634	244841	164414	105191
Glyceraldehyde-3-phosphate dehydrogenase OS=Homo sapiens OX=9606 GN=GAPDH PE=1 SV=3	8.73	36224.4	65971.4	P04406	22	85.67	0	G3P_HUMAN	281496	338116	309231	366413	347830	354290	335700	328682	320927	330176	363128	365896	292450	283080	321003	237860	215001	249891	217167	215179	261266	280278	295954	318193	284456	244427	249789	301356	248081	269869	297531	270061	339093	301145	235549	109237	300653	332645	271907	164763	134711
Actin_ cytoplasmic 1 OS=Homo sapiens OX=9606 GN=ACTB PE=1 SV=1	5.15	42079	59826.8	P60709	24	66.67	0	ACTB_HUMAN	119874	127288	95995.3	315393	314558	315325	230575	268015	279516	252185	267859	223388	176270	190626	234240	97312.8	111441	115852	122385	127703	146240	216562	200486	194876	368786	312122	366993	162992	155780	122652	165848	190370	169147	164545	185748	129035	251845	195692	234172	163180	136822
Cofilin-1 OS=Homo sapiens OX=9606 GN=CFL1 PE=1 SV=3	8.23	18730.6	55889.1	P23528	12	66.87	0	COF1_HUMAN	94510.6	101849	110182	150093	151440	135380	147356	159971	149591	165078	154248	160503	151025	161775	160876	77029	101954	105413	101109	130369	144333	72498.7	64325.9	55443.5	73767	102850	94778.9	85257.2	78011.8	80014.2	50466.8	112665	86757.5	73565.5	69152.8	71332.6	86016.6	72966	75697.7	84210.3	76144
14-3-3 protein epsilon OS=Homo sapiens OX=9606 GN=YWHAE PE=1 SV=1	4.44	29345	52477.4	P62258	22	73.33	0	1433E_HUMAN	264671	268751	237579	215630	245220	261260	236258	243046	247314	266239	282233	256208	252316	299754	291730	162098	157862	182853	161396	157838	179589	203211	197293	210990	199688	167029	180064	191180	167318	212474	159210	179756	236807	246832	190353	225087	217114	209006	221854	134111	135711
Nucleoside diphosphate kinase A OS=Homo sapiens OX=9606 GN=NME1 PE=1 SV=1	5.79	17319.8	50404.1	P15531	10	64.47	0	NDKA_HUMAN	271091	270357	258119	243803	214289	230728	218007	200374	218887	235498	247911	242595	228748	240063	246534	206959	195193	212214	218856	221239	282934	252655	258115	230370	190662	169686	168792	233315	223780	238292	170097	243460	274109	299429	285276	186478	303392	234943	278550	234587	191399
Heat shock protein HSP 90-alpha OS=Homo sapiens OX=9606 GN=HSP90AA1 PE=1 SV=5	4.75	85059.1	45271.5	P07900	49	55.19	0	HS90A_HUMAN	139790	153631	143266	287085	280110	302129	272960	263999	300282	204632	223436	211705	148172	161026	160858	117806	112023	122739	149822	145614	159097	203142	259000	236639	218524	221217	196417	211184	216587	230154	223053	196061	185202	154053	173221	167438	155471	150785	151601	154043	132228
Profilin-1 OS=Homo sapiens OX=9606 GN=PFN1 PE=1 SV=2	8.45	15225.3	45107.8	P07737	9	65	0	PROF1_HUMAN	143209	150409	142905	224349	218160	236224	220545	220484	244439	222659	243055	230943	146295	162536	168033	104126	98233	108365	110281	118550	132129	224510	206549	215881	195214	159159	168973	227993	209200	232480	190297	221987	254033	218925	197240	153446	190765	202322	191929	123575	125787
60S acidic ribosomal protein P2 OS=Homo sapiens OX=9606 GN=RPLP2 PE=1 SV=1	4.18	11665	44612.8	P05387	8	92.17	0	RLA2_HUMAN	69486.3	66133.3	61898	46307	50172.3	52442.7	53756.7	52931.3	54124	54703.7	62648.7	57069.7	82624.7	82733.3	76318.7	94800.3	88985	102220	135643	140534	145886	42338.7	42295.3	46868.3	50470	41901.7	40913.7	51846.7	71659	66871.7	79343	85622.3	79879	97411.3	63374	72381	101437	25853.7	121899	74027.3	96704.3
14-3-3 protein zeta/delta OS=Homo sapiens OX=9606 GN=YWHAZ PE=1 SV=1	4.53	27916.2	44345.5	P63104	16	62.45	0	1433Z_HUMAN	242192	242362	229515	250497	209014	231321	248824	221659	254507	263024	295112	258227	273732	284506	282034	143287	150169	172267	114587	130705	148991	172928	174456	163532	157715	155645	155474	185562	190441	168734	159692	232372	195793	201797	211410	149779	184184	195053	200226	104953	109209
Transgelin-2 OS=Homo sapiens OX=9606 GN=TAGLN2 PE=1 SV=3	8.44	22562.6	44170.5	P37802	14	65.33	0	TAGL2_HUMAN	140140	135269	125410	176487	178858	188426	184436	165614	174734	166605	171152	171748	124254	122287	121668	113236	100929	113639	109127	112859	127595	159285	156437	166716	138262	121184	115661	167367	148359	179899	199245	147817	173771	161153	127826	135852	146105	133622	139110	115481	105749
Creatine kinase B-type OS=Homo sapiens OX=9606 GN=CKB PE=1 SV=1	5.23	42929.5	43121.5	P12277	20	65.35	0	KCRB_HUMAN	111472	125811	115824	320406	295608	307542	306981	299025	314304	200065	205013	203080	134028	139794	137741	86050.7	80844.7	79610	64988	85919.7	85929.3	318269	313357	265673	266166	252558	274640	258346	275816	282359	194275	249159	236951	190978	167729	126088	153582	145217	165330	81951.7	84260
Phosphoglycerate mutase 1 OS=Homo sapiens OX=9606 GN=PGAM1 PE=1 SV=2	6.82	28918	43098.3	P18669	13	57.87	0	PGAM1_HUMAN	206288	224343	203903	199478	196573	230193	202560	202339	211530	214672	231167	224241	215359	229940	250338	152164	143895	183803	120870	116871	143884	205314	211507	200453	184634	164082	168346	209982	203210	178515	221865	255168	238211	236958	223486	191836	154950	192323	176327	52630	51382
Nucleoside diphosphate kinase B OS=Homo sapiens OX=9606 GN=NME2 PE=1 SV=1	8.75	17412.1	42398.2	P22392	11	72.37	0	NDKB_HUMAN	131413	133309	123228	135795	136468	156058	129181	131613	138825	146647	151708	148549	140841	156089	147144	128741	128659	134323	124480	132918	149177	141883	137501	146133	133840	102677	121945	69606.7	65081	79531.3	136133	150270	167978	183824	133227	110035	109251	96951.3	91636.4	86148.3	73220.7
Heat shock cognate 71 kDa protein OS=Homo sapiens OX=9606 GN=HSPA8 PE=1 SV=1	5.2	71126.3	42355.4	P11142	38	66.56	0	HSP7C_HUMAN	144230	137790	126544	297227	275831	305335	294605	261022	298679	233966	269783	246045	143367	133444	170644	92696.5	82013.2	94919.7	87554.9	92173.4	116261	340692	319025	267034	295604	392662	271436	344621	284163	277922	324900	326536	274474	237792	300132	230468	197479	227881	203648	117325	153045
Heat shock protein HSP 90-beta OS=Homo sapiens OX=9606 GN=HSP90AB1 PE=1 SV=4	4.77	83606.5	41889.5	P08238	40	52.07	0	HS90B_HUMAN	130947	141092	131347	326311	304723	341531	303831	299149	320303	209228	235885	224644	156829	157612	169849	118755	112632	131192	149547	140900	161826	283881	246245	259712	260748	209297	212202	267875	280566	232299	242862	240153	195951	151338	186858	163466	140582	167930	160948	143947	135667
60 kDa heat shock protein_ mitochondrial OS=Homo sapiens OX=9606 GN=HSPD1 PE=1 SV=2	5.56	61225.9	41384.1	P10809	42	73.12	0	CH60_HUMAN	257785	280377	261522	209366	224541	216136	230165	220000	209375	244216	244501	259651	247497	292356	300625	181250	179056	208919	157817	163427	165490	242000	228372	257979	237369	175038	184408	229169	203745	240819	252795	229324	313880	316827	259035	260463	313015	304960	271524	183489	157242
Heat shock 70 kDa protein 1A OS=Homo sapiens OX=9606 GN=HSPA1A PE=1 SV=1	5.33	70337.5	41213.6	P0DMV8	32	53.04	0	HS71A_HUMAN	198950	220239	201040	420210	421340	443419	437650	384620	439530	350970	381789	371009	206161	212494	221254	123398	120070	124245	164344	154991	181071	471183	479356	400407	318154	348223	312795	445716	487363	356775	413975	436183	373276	299450	304888	263849	246861	280116	288338	174961	195769
L-lactate dehydrogenase B chain OS=Homo sapiens OX=9606 GN=LDHB PE=1 SV=2	5.66	36923.7	40522.7	P07195	21	53.29	0	LDHB_HUMAN	347439	333000	301756	357820	322689	316552	352344	342837	334217	343884	366914	384426	372273	366774	392569	242571	258007	284746	339667	336282	370050	288705	324521	261753	301823	213177	236136	277956	340715	276101	282955	287367	342293	302080	332441	186556	329804	346903	359676	241090	232978
Peroxiredoxin-6 OS=Homo sapiens OX=9606 GN=PRDX6 PE=1 SV=3	5.98	25149.1	40073.1	P30041	18	70.09	0	PRDX6_HUMAN	156886	147648	139743	146841	157176	150152	146564	147762	152182	166518	180377	160985	121587	135166	134090	81784	73316.7	67268	60404	63947.3	59635.3	124491	112304	132932	122896	99887.7	102021	151683	153790	125429	150726	157521	164060	155187	137288	103636	92964.7	95380.7	121290	63014.3	57927.7
L-lactate dehydrogenase A chain OS=Homo sapiens OX=9606 GN=LDHA PE=1 SV=2	8.38	36973.9	39009.4	P00338	21	54.52	0	LDHA_HUMAN	294277	308554	275655	281028	272085	239452	272650	275159	267789	294864	302750	293250	297092	302901	302882	220165	226901	233309	235139	247231	239851	220036	225479	262398	237699	186957	186780	203062	229091	270088	286939	245584	297254	299061	213794	237186	326235	294001	306216	146950	147874
Tubulin beta chain OS=Homo sapiens OX=9606 GN=TUBB PE=1 SV=2	4.59	50127.2	38704.5	P07437	18	43.92	0	TBB5_HUMAN	143567	158437	153046	191490	179852	182657	191633	181005	193732	158991	161484	172425	133703	146983	147817	70059.1	65099.7	72364.3	68914.1	74908.5	74264.8	159272	146319	136186	109461	107382	111286	169630	157898	124990	234954	171344	154179	114418	118329	113863	78121.5	88004	101854	42541.7	80951.8
Glutathione S-transferase P OS=Homo sapiens OX=9606 GN=GSTP1 PE=1 SV=2	5.29	23584	38401.2	P09211	11	62.38	0	GSTP1_HUMAN	5865	6966	7082	102919	101819	94627.3	92657.3	92150.7	82236.7	57814.7	59405.3	55852.7	8444.67	8663	9795.67	5248.5	6837.33	7228	6643.67	6789.67	10578	87323.3	85996.3	74627	74532.7	84605	82354.7	85974.3	86907	58838.7	67955.3	75649.7	63708.3	24146.7	9423.33	15240.3	15954	3727	15180	9815
Tubulin beta-2B chain OS=Homo sapiens OX=9606 GN=TUBB2B PE=1 SV=1	4.59	50409.4	37181.9	Q9BVA1	18	46.52	0	TBB2B_HUMAN	40505.6	45619.6	46037.4	43112.1	43903.9	48542.9	46800.1	46563.5	50021.5	45284.7	47597.4	47822.4	53863.9	57333.2	62329.8	18789.6	18087.8	20675.4	15063.2	14619.4	15738.3	20043.1	19858.8	17522.9	18944.8	12908.7	19719.4	26085.4	25913.8	24281.7	36530.8	32961.6	27899.1	33351.7	32443.7	30928.2	32698.4	35357.5	40039.7	11184.3	19368.7
Tubulin beta-4B chain OS=Homo sapiens OX=9606 GN=TUBB4B PE=1 SV=1	4.6	50287.4	37062.3	P68371	18	49.89	0	TBB4B_HUMAN	103524	110321	102497	120463	119505	120289	114192	112960	85053.7	106426	106786	109594	103896	110681	105289	54873	35702.7	55775.1	24438.3	34688.3	37114.2							9959.43	9500.59	6195.2				24458.7	17953.5	16741.1
Tubulin alpha-1C chain OS=Homo sapiens OX=9606 GN=TUBA1C PE=1 SV=1	4.79	50579.7	36732.4	Q9BQE3	22	55.9	0	TBA1C_HUMAN	60483.6	63835.9	59743.1							2549.32	1727.71	976.943	245.638	892.014	479.822	67778.3	67356.3	74872.5	68362.3	72540.5	76626				44049.4	44267.5	44766.9	123510	120313	100120				103220	107238	108072	74631.8	74264.3	78799.3	40526.1	42253.2
Tubulin beta-2A chain OS=Homo sapiens OX=9606 GN=TUBB2A PE=1 SV=1	4.59	50306.3	36487.6	Q13885	18	46.52	0	TBB2A_HUMAN	10838.7	10461	9973.38	12243.7	12149.7	12116.2	13560.7	13955.1	13283.9	11906.8	13326	12369.9	12556.2	13232.4	14153.8	3080.48	2879.36	3409.1	2878.77	3490.32	4854.52	3879.39	3400.98	5567.16	5349.28	3535.01	3557.19	7302.73	7198.31	7489.89	6091.08	9383.46	8462.19	7757.74	6375.57	3204.31	6241.41	6001.58	7128.75
Tubulin alpha-1A chain OS=Homo sapiens OX=9606 GN=TUBA1A PE=1 SV=1	4.76	50820	36391.6	Q71U36	23	61.42	0	TBA1A_HUMAN	184560	194902	182885	344766	346296	377689	328392	334188	332342	268062	312178	314487	262996	270141	283043	67778.3	67356.3	74872.5	68362.3	72540.5	76626	225317	223679	213665	162830	158787	160922	123510	120313	100120	199561	240212	227270	103220	107238	108072	74631.8	74264.3	78799.3	40526.1	42253.2
Pyruvate kinase PKM OS=Homo sapiens OX=9606 GN=PKM PE=1 SV=4	7.76	58507.3	36302.8	P14618	28	59.32	0	KPYM_HUMAN	214348	246562	232301	299363	284480	285085	285834	282230	291507	277067	307459	294616	252584	261575	278948	31001	42324.1	41410.4	33919.7	39513	35754.7	269368	248846	261659	272407	261634	254391	254306	247434	224867	208707	301255	233967	217652	243609	127725	146005	104640	144017	65313.5	59201.9
Peroxiredoxin-1 OS=Homo sapiens OX=9606 GN=PRDX1 PE=1 SV=1	8.24	22338.5	36287.6	Q06830	14	65.33	0	PRDX1_HUMAN	223081	235846	217671	226582	228092	264092	238189	234217	265254	255940	265820	265639	193757	214731	245316	162342	160589	166905	179088	179738	208068	219090	239741	220287	214485	187295	192362	245888	257194	231803	272152	225166	281325	270044	245562	177319	217163	205359	251318	214318	201744
Calmodulin-1 OS=Homo sapiens OX=9606 GN=CALM1 PE=1 SV=1	3.88	16837.7	36220.1	P0DP23	12	61.07	0	CALM1_HUMAN	226935	228643	220486	189206	170903	199531	186440	169419	208895	184370	232161	183479	209165	208689	258925	190460	190597	221675	253061	235802	298809	164666	133003	163263	174000	162487	143665	214584	191980	181806	208074	222493	207149	245684	269299	192024	201973	261536	181529	159468	178318
Eukaryotic initiation factor 4A-I OS=Homo sapiens OX=9606 GN=EIF4A1 PE=1 SV=1	5.16	46382.2	36156.6	P60842	32	68.23	0	IF4A1_HUMAN	26547.7	25672.4	25139.3	150248	147932	157250	141531	139789	143881	95934.3	94190.9	96534.6	19822.1	20448.9	22574.6	13202	12207.5	12919.3	17914.1	17923.9	17353.7	116261	116219	117927	107455	85627.4	90943.4	114018	115122	99523.3	95023.7	73629	71796.2	39166.6	43222.1	40926.2	25557.8	28861.2	30155.5	20640.5	23037.3
14-3-3 protein theta OS=Homo sapiens OX=9606 GN=YWHAQ PE=1 SV=1	4.48	28049.4	34998.5	P27348	12	44.9	0	1433T_HUMAN	65732.4	66289.3	69465.7	134956	142764	137407	135894	140972	144392	149800	153164	129774	90099	91657.3	91579.7	41463	38088.3	43107.3	44365.7	48236	57273.7	131759	131073	113070	117411	124869	109867	139912	123851	108225	121195	146349	129081	80813.7	98460	86278.7	61059.3	69138.4	66932.5	58336.7	65841.6
Peptidyl-prolyl cis-trans isomerase FKBP4 OS=Homo sapiens OX=9606 GN=FKBP4 PE=1 SV=3	5.19	52089.8	34104.7	Q02790	30	63.18	0	FKBP4_HUMAN	31191.3	30312.3	30773.7	121428	114348	142771	121990	116138	147258	61248.3	76480.7	65432	32384.7	31928	36871.7	22567	20990.7	23502.7	24769	25856	30355.7	136065	140893	141065	123408	121494	144235	147333	149959	149515	112910	90994	103214	77168.3	88327.3	74515.7	62581	57277.7	67395	48878.7	43635.3
T-complex protein 1 subunit beta OS=Homo sapiens OX=9606 GN=CCT2 PE=1 SV=4	6.02	57830.5	33749.7	P78371	32	62.99	0	TCPB_HUMAN	78192.7	77862.7	81511	130363	136307	150768	127795	133826	158936	146418	172451	146079	92651.7	97876	116129	23353	23605.7	28389.3	24083.7	23754.3	28253.7	131497	137736	122705	113614	120986	146179	146482	148291	125801	204644	165028	138397	114181	148930	138875	72750.7	74443.7	78024.3	25448.7	31293.3
Tubulin-specific chaperone A OS=Homo sapiens OX=9606 GN=TBCA PE=1 SV=3	5.05	12911.9	33529.7	O75347	12	65.74	0	TBCA_HUMAN	86927	82947.3	81519	55347	53189.3	66097.7	59544	55027.3	63664	73428.7	79207.7	72020	103238	103983	101958	94072.7	89029.3	84327.3	105992	110790	111557	60321	55000.3	62097.3	61873	56668.3	54293.7	68544.3	62947.3	64225.7	77953.7	77307.7	78469	82453.3	80878.7	75350.7	82790.7	80761	77119.7	72606	70730.7
3-hydroxyacyl-CoA dehydrogenase type-2 OS=Homo sapiens OX=9606 GN=HSD17B10 PE=1 SV=3	7.83	27151.2	33031.5	Q99714	12	71.65	0	HCD2_HUMAN	13004	10793.7	12090.7	31302.3	33389	27236.3	30841	32138	29167.7	41780.7	37271.3	42092.3	12711	12200	14300.7	21172	20085	29525	22600	23648	32322	57196.7	55443.3	50618	42914	47459.3	49962	50350.7	50813	47919.7	59100.7	65777.7	58698.7	33222	28163.3	24672.3	11033	10998.3	13740.3	9788.5	11999
Carbonic anhydrase 2 OS=Homo sapiens OX=9606 GN=CA2 PE=1 SV=2	7.06	29303.1	31870.7	P00918	15	74.62	0	CAH2_HUMAN	97683	97119.7	93782.7	200603	195440	226110	190261	193246	227166	198091	218773	196864	106206	104696	108470	32094	53016.7	54791.3	67243.3	70677	70997.3	226676	212581	210981	221008	188959	190626	208573	201076	225566	166472	199367	219016	159564	159865	142345	127090	116368	113386	110361	98779.7
Inorganic pyrophosphatase OS=Homo sapiens OX=9606 GN=PPA1 PE=1 SV=2	5.46	33116.3	31351.5	Q15181	18	59.17	0	IPYR_HUMAN	86298.3	94515.7	94908.3	147928	147337	157662	147707	146679	151535	151490	162193	153718	103162	104027	110371	58687	55687	56500.7	54291.3	53170.3	53777.3	149537	154522	123016	134213	139739	151694	144195	136469	139001	139659	174175	156180	153915	119383	102353	130325	107514	118300	71275.7	62128
Protein disulfide-isomerase A3 OS=Homo sapiens OX=9606 GN=PDIA3 PE=1 SV=4	5.96	57181.6	31017.7	P30101	31	59.8	0	PDIA3_HUMAN	80652.7	84093.3	87312.7	113074	114154	124302	109900	104815	113099	85340.7	100644	93110.3	87814.7	85663.7	96715.3	97365.3	87197.7	100861	101049	110248	124749	161829	165731	143759	136657	137490	132914	154965	136183	121648	138990	130896	123389	124376	146196	157555	134338	151990	136877	121653	120289
Putative nucleoside diphosphate kinase OS=Homo sapiens OX=9606 GN=NME2P1 PE=5 SV=1	8.86	15700.2	30744.8	O60361	6	53.28	0	NDK8_HUMAN	48063	48658.2	44978.7				7686.65	7831.36	8260.51	9690.41	10025.5	10054.3	11005.5	11657.8	11858.6	22910.9	22896.4	23904.3	29589.6	31595.4	35460.3							69606.7	65081	79531.3							111629	96951.3	104349	86148.3	73220.7
Phosphatidylethanolamine-binding protein 1 OS=Homo sapiens OX=9606 GN=PEBP1 PE=1 SV=3	7.41	21170.9	30458.2	P30086	10	68.98	0	PEBP1_HUMAN	114132	122399	114066	103109	98248.7	105721	100405	93679.3	106179	108818	121438	110748	150106	144829	161896	118892	105894	126050	96813	96023	120233	121813	115380	92157.7	91456	112102	110035	146987	146916	104247	152766	175572	136530	152238	203544	153478	130695	163134	161448	61202	64905.3
Y-box-binding protein 1 OS=Homo sapiens OX=9606 GN=YBX1 PE=1 SV=3	10.29	35924.2	30169.7	P67809	16	56.79	0	YBOX1_HUMAN	30521.4	25992.8	28209.3	54181.8	53034.3	70365.5	45186.7	45293.6	69365.4	39441.2	62573.8	37967.9	33471	31573.1	60471.7	51169.4	45711.4	68119.7	68913.3	73590.6	106697	70668	71643	65852.5	50708.8	51881.6	51916.4	87257.2	105650	84076	106828	100329	98242.8	112529	135173	106691	125562	134499	150370	139637	150963
Histone H4 OS=Homo sapiens OX=9606 GN=H4C1 PE=1 SV=2	11.89	11367.4	30155.1	P62805	7	58.25	0	H4_HUMAN	45144	39771	39065.3	52708.3	52982	54640.3	35027.3	35298	33976.3	35189	36948.7	38449.3	25600.3	25853.3	25061.7	18704	17177.7	18011.3	33535.7	32478	34440.7	73557.7	72705.3	62053.3	55439.3	57960	58120	98413.3	97228.3	77977.7	86634	76096	64710	78483.3	95887	89986	53310.7	58173	59172.3	101635	117627
Ran-specific GTPase-activating protein OS=Homo sapiens OX=9606 GN=RANBP1 PE=1 SV=1	5.03	23481.2	29851.4	P43487	7	41.79	0	RANG_HUMAN	64222.3	93210.3	97178.7	128127	130020	138549	120716	127110	136910	106699	113548	110921	112967	117975	118314	98771	89864.3	91499	109804	106712	128254	149698	146158	134429	127896	129890	193960	161988	161743	132972	137579	161142	145353	126780	116722	111328	118531	132739	134816	61531.3	90934.3
Endoplasmin OS=Homo sapiens OX=9606 GN=HSP90B1 PE=1 SV=1	4.56	92754.2	29729.8	P14625	59	65.38	0	ENPL_HUMAN	184281	195347	182730	207876	202260	219687	201772	201337	220705	206812	233735	217517	201312	210177	228063	174652	165950	189244	225479	210614	253675	234882	240208	201593	182497	242523	198035	225734	238171	195265	226160	235591	212350	198208	194979	196026	214646	227364	196105	195056	183473
14-3-3 protein beta/alpha OS=Homo sapiens OX=9606 GN=YWHAB PE=1 SV=3	4.57	28196.5	29427.7	P31946	13	57.32	0	1433B_HUMAN	104690	107126	103859	127727	117249	134765	131202	128551	151649	144614	170006	135641	114875	118623	155687	52644.9	50442	66588.7	49260.3	51754.3	68338	113552	113210	107010	101490	98986.7	99809	121119	130693	112656	144510	154530	135963	124559	141360	97245	86278.7	87507	95666.7	67513.7	68912.3
Protein/nucleic acid deglycase DJ-1 OS=Homo sapiens OX=9606 GN=PARK7 PE=1 SV=2	6.4	20062.2	29077.7	Q99497	13	61.9	0	PARK7_HUMAN	136587	134197	136010	119356	120725	129543	107212	111755	126639	144831	164981	146257	137767	146866	169859	124857	119094	133895	107604	118299	126802	85989.3	79216	75907	66041.7	79669	76807.3	110029	101680	77347.7	105960	110614	112958	129779	113622	113253	103578	85699.7	88399	79735.7	77492
Keratin_ type I cytoskeletal 9 OS=Homo sapiens OX=9606 GN=KRT9 PE=1 SV=3	4.96	62292.5	29030.6	P35527	34	73.68	0	K1C9_HUMAN	183926	189590	178030	73762.3	67553.3	122419	108499	101414	157692	99868.7	167554	110074	84100.7	75904.7	142608	291472	274848	341475	114848	116469	184805	161048	138360	188969	113552	67599.7	67792	202929	195413	220816	137296	137020	181568	222353	228013	195366	247401	230628	234155	221818	214092
Eukaryotic translation initiation factor 5A-1 OS=Homo sapiens OX=9606 GN=EIF5A PE=1 SV=2	4.9	17060.4	28753.3	P63241	7	41.56	0	IF5A1_HUMAN	104531	141993	139088	158348	161969	134742	171852	178052	117605	151630	129278	153360	110996	112302	122310	123095	110070	107602	112820	155501	126952	126524	125423	133307	124735	119534	120451	137393	121499	98974.3	81793.3	126123	115809	118095	44172	55929	89436.7	96971	82873	106037	95160.7
Fructose-bisphosphate aldolase A OS=Homo sapiens OX=9606 GN=ALDOA PE=1 SV=2	8.07	39876.3	28689.9	P04075	21	54.4	0	ALDOA_HUMAN	234224	231382	229040	211111	203200	222807	210189	201525	215177	227002	242308	236829	263795	250220	285073	198597	182872	224124	187450	183357	212842	209523	208126	222622	181310	162056	159734	274892	271547	231142	241713	250894	270483	286151	343035	216031	278752	300579	285133	174140	163069
Nucleophosmin OS=Homo sapiens OX=9606 GN=NPM1 PE=1 SV=2	4.45	32746.2	28502	P06748	14	44.9	0	NPM_HUMAN	133588	153360	146077	165980	176108	199830	147608	162306	161948	163576	173232	161245	146527	156851	177324	130470	132459	137695	159477	175866	190491	189023	187492	161321	155933	154561	160317	193949	135262	174107	176919	145451	182389	209726	167469	197986	232802	278709	252334	209487	215008
Keratin_ type II cytoskeletal 1 OS=Homo sapiens OX=9606 GN=KRT1 PE=1 SV=6	8.29	66209.9	28192.5	P04264	37	58.54	0	K2C1_HUMAN	231539	222171	214451	113831	111260	119184	134254	124524	155514	125412	159512	138704	139708	135187	157096	309780	310477	357648	162145	151728	181748	156934	163370	146570	98401.3	94398.3	85994.2	231083	232498	198349	166752	168669	158683	251258	259831	225174	204952	231714	225031	222488	211488
Stress-70 protein_ mitochondrial OS=Homo sapiens OX=9606 GN=HSPA9 PE=1 SV=2	5.8	73965.8	27963.3	P38646	44	64.36	0	GRP75_HUMAN	23881	23233.7	45818.3	142332	139409	140662	124429	126658	135290	111935	122511	122227	49501.3	45890.3	46068.3	34322.3	9534.67	31511.7	10172	34133.7	34739.3	225342	220335	194853	184673	173748	171788	216696	218605	198104	202180	229441	190687	117160	140851	107658	116181	113358	133013	100614	105007
Nascent polypeptide-associated complex subunit alpha_ muscle-specific form OS=Homo sapiens OX=9606 GN=NACA PE=1 SV=1	10.31	206106	27487.3	E9PAV3	29	18.14	0	NACAM_HUMAN	115408	133913	128921	140997	136349	142579	140581	140444	147498	152394	161088	165172	145328	140020	146258	139455	133160	152893	185296	169871	198579	138863	145013	110577	114415	116245	120669	170917	167499	93942.7	169476	191287	140433	143966	162377	116514	94730.3	118028	124887	57447	96259.7
Tubulin beta-4A chain OS=Homo sapiens OX=9606 GN=TUBB4A PE=1 SV=2	4.59	50042.1	27364.7	P04350	16	50	0	TBB4A_HUMAN	1712.97	2822.31	1994.04	4404.93	5482.86	6545.74	3419.1	4031.68	3768.56	5225.6	5134.91	3550.51	3955.56	3947.05	4377.27	4240.37	4580.08	2559.44				15648.1	14644.8	11517.4	19223.1	23656.4	24494.3	9850.81	8329.78	4793.78	15369.1	18213.8	14497.1
Protein disulfide-isomerase OS=Homo sapiens OX=9606 GN=P4HB PE=1 SV=3	4.57	57515.6	27328.6	P07237	39	67.91	0	PDIA1_HUMAN	196884	184367	175747	162725	157754	178389	165626	163107	172728	179532	211314	186599	195154	210823	234230	165837	160308	180820	203426	199062	241269	216123	231173	190166	190132	187797	193147	223585	219478	186609	251375	252915	233630	235123	259036	239222	219080	252681	261898	209370	167372
Heterogeneous nuclear ribonucleoprotein A1 OS=Homo sapiens OX=9606 GN=HNRNPA1 PE=1 SV=5	9.45	38860.8	26982.7	P09651	18	55.11	0	ROA1_HUMAN	52667.3	55148	56770.7	131572	142107	154769	121390	126662	147583	112211	114910	98151.7	83754.3	81585.3	98741.3	47918.3	56450.3	52909.7	64763.3	73271.7	69057.7	155483	137325	150349	146658	133277	129043	149147	135968	143619	161927	157845	158622	128229	126281	115310	95011.3	99561.2	110359	65738.6	66632.1
Elongation factor 1-beta OS=Homo sapiens OX=9606 GN=EEF1B2 PE=1 SV=3	4.3	24934.8	26786.2	P24534	12	62.67	0	EF1B_HUMAN	57269	85137.3	83653	158855	167238	164165	167297	165620	166051	113611	125487	118976	92787.3	90546	102655	101269	98627	108274	136494	137464	150014	145818	130169	156911	164641	101435	132335	174264	177584	113162	138185	144060	175118	133057	84800	88113	83766.3	85758	102723	108774	103084
Elongation factor 2 OS=Homo sapiens OX=9606 GN=EEF2 PE=1 SV=4	6.43	96307.8	26161.2	P13639	43	49.42	0	EF2_HUMAN	207296	203907	190259	211047	199245	195114	217907	202154	214907	222176	244598	228155	196294	199214	222351	80701.3	69268	71460.3	35599.3	38086	40080.7	201004	196657	203542	198902	165652	172900	208147	191423	212574	161905	200611	221602	212201	202086	208604	196163	184524	171103	85516.3	86246
Myosin regulatory light chain 12A OS=Homo sapiens OX=9606 GN=MYL12A PE=1 SV=2	4.45	19851.2	26146.7	P19105	11	54.39	0	ML12A_HUMAN	21568.7	20286.3	19133	90958.3	89416.3	99579.3	78947.7	86758.7	93070.3	62701	75479	53995	18145.7	19117	21368	14599.3	15420	16003.3	20914	19982.7	21022	70078	69501	64419.7	58907	57764.3	59812	42750.7	44934	40891.7	38576.3	35475.3	32715.3	35327.3	43363	40189	37731.7	42540	47045	34144.7	41546.3
GTP-binding nuclear protein Ran OS=Homo sapiens OX=9606 GN=RAN PE=1 SV=3	7.33	24594.2	25922.2	P62826	12	46.76	0	RAN_HUMAN	173367	184105	178586	215826	205904	223852	216928	210532	217347	215307	223760	224367	182062	187565	185680	79647	71812	70583	41012.3	41748	40972	164326	158948	202429	216178	143314	166225	182644	165246	179173	32355.3	173433	185344	179127	154493	30242.7	158206	152093	130816	54047	63681.7
Complement component 1 Q subcomponent-binding protein_ mitochondrial OS=Homo sapiens OX=9606 GN=C1QBP PE=1 SV=1	4.55	31761.5	25785.9	Q07021	6	31.21	0	C1QBP_HUMAN	15517	32634	38861.3	181048	171087	191183	175273	170076	187400	145282	167165	155015	51711.3	52864	58423.3	25338.3	38638	40541	36123.3	43222.7	42541	221323	210854	197656	245597	189104	195979	180476	159670	86013.3	157405	235331	162331	102534	50129	35657.7	30615	16848.5	23102.5	8933	16788
Peptidyl-prolyl cis-trans isomerase A OS=Homo sapiens OX=9606 GN=PPIA PE=1 SV=2	7.85	18240.6	25705.6	P62937	9	44.85	0	PPIA_HUMAN	184739	192965	171630	257743	254736	265428	222420	259074	273940	235479	253086	205949	160400	186818	198170	145439	127755	143652	148187	165481	177318	253588	218100	239282	216844	139734	137623	210621	202761	259061	189304	187839	256232	226934	172608		232242	148984	194485	139634	152303
Endoplasmic reticulum chaperone BiP OS=Homo sapiens OX=9606 GN=HSPA5 PE=1 SV=2	4.88	72447.1	25506.6	P11021	35	56.12	0	BIP_HUMAN	143920	144287	134107	135065	137190	152930	138567	136543	151432	143832	162423	149381	147679	155636	161188	138477	128134	145578	159241	155349	179329	203167	210642	190417	178562	168573	175544	232459	232840	180011	252755	242866	198227	197581	237441	235128	205276	261639	227327	181907	199923
Phosphoglycerate kinase 1 OS=Homo sapiens OX=9606 GN=PGK1 PE=1 SV=3	8.16	45014	25453.4	P00558	26	67.63	0	PGK1_HUMAN	73153.3	68011.3	73053.7	181552	182225	195633	183214	178236	195691	190554	205979	196063	47788.9	46964.6	40261.5	45408.6	45193	41616.7	50627	56735.2	51182.3	176763	179488	182724	172557	150687	151338	182064	189688	171628	167448	189858	203633	97787.8	83002.6	78150.6	51517.3	60975.7	60867.3	30522.3	31162
Triosephosphate isomerase OS=Homo sapiens OX=9606 GN=TPI1 PE=1 SV=3	5.56	31076.2	25411.8	P60174	14	58.39	0	TPIS_HUMAN	255468	253986	245192	229140	234470	255283	244842	238795	254197	252305	271114	270253	240625	257242	281803	189205	175881	203282	183456	168968	184198	224330	200148	219840	200453	169804	175298	248591	236055	221555	267209	241431	276977	241154	241358	210976	202371	212669	225968	121671	129537
Proliferating cell nuclear antigen OS=Homo sapiens OX=9606 GN=PCNA PE=1 SV=1	4.38	29111	25297.4	P12004	15	59.39	0	PCNA_HUMAN	115216	120101	106816	111632	119975	125265	121099	117524	127949	126922	142743	130922	114474	111350	134386	66273.3	61480.3	66793	47364.3	45252.7	58613.7	134212	132682	144035	131294	128407	121311	143734	135036	146697	156375	167211	163903	166090	150964	158011	159160	127616	133986	86935.7	71487.7
Peptidyl-prolyl cis-trans isomerase FKBP1A OS=Homo sapiens OX=9606 GN=FKBP1A PE=1 SV=2	8.61	12007.8	25276.8	P62942	1	12.96	0	FKB1A_HUMAN	13589	13536	15497	16827	17658	19096	13948	15873	17130	18365	22860	19592	16081	15716	17732	14711	13682	16628	15893	14826	17006	14026	13994	13524	6875	6516	6497	15535	13183	17886	23020	25510	26624	34215	27105	17008	11700	11489	12926		4599
Calreticulin OS=Homo sapiens OX=9606 GN=CALR PE=1 SV=1	4.09	48312.7	24751.5	P27797	31	56.83	0	CALR_HUMAN	255187	247213	257363	220837	272636	260583	251715	249670	297041	246141	285691	209020	306214	258120	253570	173401	159342	213225	307395	228857	282503	236756	227574	291090	309410	210274	201821	210741	207051	265307	148541	233643	292493	261771	281093	152126	255027	242492	215921	229703	237694
Heterogeneous nuclear ribonucleoprotein K OS=Homo sapiens OX=9606 GN=HNRNPK PE=1 SV=1	5.22	51261.5	24672.2	P61978	21	52.48	0	HNRPK_HUMAN	90575	99579.7	103452	170462	171924	177126	176978	166096	167731	126948	121640	136316	123882	121858	111812	101856	89976	101854	107281	111206	118820	175893	186443	176239	142473	171737	172490	172667	184291	162942	169978	158974	166304	130378	134272	123492	118013	118088	125272	114028	111080
10 kDa heat shock protein_ mitochondrial OS=Homo sapiens OX=9606 GN=HSPE1 PE=1 SV=2	9.55	10931.7	24468.4	P61604	10	66.67	0	CH10_HUMAN	142758	147214	142024	74205.3	79056.3	76872.7	77436	82544.3	72314.7	106802	99975.3	105307	134839	135412	130377	120646	126089	118633	132776	144166	148332	81213.3	79602.7	93028	64138.7	52672	54732.7	93421.7	93474	96184.7	125250	115376	112186	153611	139475	124922	192537	191642	185123	206365	190012
Serine/arginine-rich splicing factor 2 OS=Homo sapiens OX=9606 GN=SRSF2 PE=1 SV=4	12.34	25476.4	24063.3	Q01130	12	42.99	0	SRSF2_HUMAN	42096.3	43714.7	41673.7	53744.7	44251.4	43412.2	47443.4	50426.8	48751	45343.1	48645.1	45363.5	34759.2	32777	36446.2	47489	46143.7	38915.6	61763.2	64412.7	63812.6	58208.9	54436.9	54918	36012.2	32574.3	34104.5	63790.5	65879.9	60073.2	79295.3	60674.2	62361.7	63400.2	61766.3	28387.8	35257.2	11888.3	31665	45838.9	35576.6
Purine nucleoside phosphorylase OS=Homo sapiens OX=9606 GN=PNP PE=1 SV=2	6.53	32346.1	23841.1	P00491	18	69.2	0	PNPH_HUMAN	94964	94636.7	91728.7	53974	60525.3	56242.7	55071	60196	55989.7	90029	79718.7	80104.7	85392	86308.3	83105.3	121798	111827	120674	125046	122161	131324	50425.3	49153.7	48204	46450.3	50409	42427	55540.3	56530	52118.7	70015	65831.3	63652.3	73245.7	81054.7	64428.7	54821	60462	68153	43581.7	52891
Malate dehydrogenase_ mitochondrial OS=Homo sapiens OX=9606 GN=MDH2 PE=1 SV=3	8.86	35959.6	23743.2	P40926	19	59.47	0	MDHM_HUMAN	181940	203848	182413	191322	201934	202851	197996	211878	199483	215856	222671	227265	207619	237652	243806	112945	129302	124539	17104.7	25734	19381.3	232028	183715	217496	223212	152916	143410	207257	225192	195911	196907	219443	240417	256962	244956	218271	239421	192098	200401	16909.3	25803
14-3-3 protein gamma OS=Homo sapiens OX=9606 GN=YWHAG PE=1 SV=2	4.61	28473.7	23642.5	P61981	12	51.82	0	1433G_HUMAN	103184	95361.4	86911.7	81999.3	135040	85298.7	91051.5	137129	141383	102506	150345	89578	109626	115413	184050	73480	65545.7	79871.6	62808	62738.4	76481.9	61969.8	58351.9	62530.3	54751.6	54665	57035.3	64192.8	74187.8	60702.6	105397	134973	76023.5	91541.7	170303	99176	90657.1	85679.3	157864	41875.5	41957.5
Ubiquitin-60S ribosomal protein L40 OS=Homo sapiens OX=9606 GN=UBA52 PE=1 SV=2	10.5	15013.5	23566	P62987	8	53.13	0	RL40_HUMAN	154375	193412	181270	162769	146075	165564	150460	127802	147802	180307	171166	179794	165230	180064	155103	145486	152145	168986	190644	192789	221813	185526	185933	153297	108571	121948	126073	190526	169260	136848	171482	153174	146230	148731	128007	138751	156506	189687	96472	167674	146505
Elongation factor 1-alpha 1 OS=Homo sapiens OX=9606 GN=EEF1A1 PE=1 SV=1	9.49	50483.1	23503.4	P68104	20	45.67	0	EF1A1_HUMAN	164339	162700	160789	362660	336934	306554	351466	325530	347057	279372	307003	291783	145826	152298	168551	111601	101870	112322	127216	135872	152008	343969	349362	345327	384839	219491	282669	323140	336213	329124	186429	263535	294241	215874	194006	166885	198528	194889	191971	170800	146358
ADP-sugar pyrophosphatase OS=Homo sapiens OX=9606 GN=NUDT5 PE=1 SV=1	4.67	24612.8	22934.8	Q9UKK9	11	49.77	0	NUDT5_HUMAN	101151	117359	113410	75884	80811.7	81152	76061	79814	89565.3	101423	111224	98956	120357	127575	130297	134399	124994	138636	154732	155909	173992	62386.3	59887	53421	56009.7	59170.7	59036.7	71306.7	67640	62225	73969	88028	77901.3	91468.7	94274.3	80395	102213	108425	117620	92902.7	86261.7
Rab GDP dissociation inhibitor beta OS=Homo sapiens OX=9606 GN=GDI2 PE=1 SV=2	6.08	51119.6	22893.7	P50395	30	63.6	0	GDIB_HUMAN	97962.7	97382.9	98068.2	110806	102610	104711	121433	112553	116202	126008	143253	147749	108965	101704	100771	13183	13537.4	13334.7	16600.8	15302.1	14837.1	99629.3	96453.7	119673	106955	86563.3	87954.8	104421	111762	83839.8	142016	111930	137256	113084	77901.3	93562	26100	18613.6	30625.5	23579	12359
Prothymosin alpha OS=Homo sapiens OX=9606 GN=PTMA PE=1 SV=2	3.45	12203	22770.5	P06454	5	35.14	0	PTMA_HUMAN	200020	190216	187085	157034	184496	248994	163442	203670	257898	198618	267740	174590	236025	221237	280501	176390	180937	212688	188104	187167	250648	157330	133505	221886	191322	150421	149917	195520	195007	233442	184659	214854	284309	286074	204466	185864	284733	299003	165155	210259	180947
Annexin A5 OS=Homo sapiens OX=9606 GN=ANXA5 PE=1 SV=2	4.73	35993.9	22760.7	P08758	20	66.88	0	ANXA5_HUMAN	28468	25172.7	25374.3	108529	102613	112021	106704	110898	118270	58244.3	61939.3	63543.7	20667.3	21344.7	23995.7	18776.7	17345.7	16804	22321.3	22229.3	22255.3	69166.7	71519.7	73428	68275.7	64013.7	66584.7	79179	80558.3	85201.7	50490.3	46559.7	49499.7	32544	29478	23830	30094.7	30726.3	34642.7	25007	23265.7
ADP-ribosylation factor 1 OS=Homo sapiens OX=9606 GN=ARF1 PE=1 SV=2	6.41	20753.8	22648.6	P84077	14	76.24	0	ARF1_HUMAN	66207.7	74758.1	68113.7	77850.9	79044.3	74954.5	93435	95840.8	85362.6	94393.9	100635	98261.3	75596	72668	65666.1	44005.7	38672	36315.7	30603.3	29110.3	26902.3	82383.2	78199.2	78367.7	56521.5	56205.2	56842.9	78496.4	75922.8	69494.7	78024.1	80370.6	72976.2	68116	76748.3	63358	44775	45753.7	50343.1	17625	19513
40S ribosomal protein S3 OS=Homo sapiens OX=9606 GN=RPS3 PE=1 SV=2	10.24	26859.4	22558.6	P23396	15	53.91	0	RS3_HUMAN	30219.7	29236.7	30096.7	76487	76959.3	77263.7	62466	61021.7	69357.7	40126.3	49129	42154.7	25134.3	23619.3	30717.7	13541.3	13619.7	16014.3	22455.7	23810	25049	54587.3	56691	54567.3	39981.3	38318	39335.3	42811	41748	41808	28823	30491	32315.3	24442.7	24456.7	20737.3	14277.7	12521.7	14181.7	12569.3	11535.3
Alpha-actinin-4 OS=Homo sapiens OX=9606 GN=ACTN4 PE=1 SV=2	5.13	105310	22419.5	O43707	57	65.75	0	ACTN4_HUMAN	137146	150259	147052	107638	112167	114281	107917	116801	122283	145465	151822	142632	144481	149269	157172	93036.7	87439.3	81709.7	27850.7	26886.7	26719.3	111130	110053	90427	91657.6	94333	95684.7	118740	113452	102888	126174	117944	106310	120693	152406	124374	107012	120621	125689	29134.3	24012.3
Peptidyl-prolyl cis-trans isomerase B OS=Homo sapiens OX=9606 GN=PPIB PE=1 SV=2	10.06	23799.6	22340.9	P23284	15	57.41	0	PPIB_HUMAN	68519.7	64270	67640.7	71281	81984	79692.7	73332.7	80968.3	83580.3	72303	81381.7	80570.7	72059	71434	73086.3	90814.7	78239	83085.3	102224	102775	104554	126077	134420	126710	110457	121396	116399	127127	120996	138241	129757	113036	131597	107469	104857	99038	111480	117138	135932	74861.7	91176
Enoyl-CoA hydratase_ mitochondrial OS=Homo sapiens OX=9606 GN=ECHS1 PE=1 SV=4	8.07	31843.7	22304.8	P30084	11	38.97	0	ECHM_HUMAN				61170.3	63029	67390	58399	56413.3	63850	72568.3	82408.7	78202	5835	6458	5506.5		34859.5	28078.5		3817	3851	115832	116757	99341.3	93840.7	94555.3	94431.3	114812	121587	82523.3	147514	151906	126370	25468.3	24368.7	17207.7	18246.3	20670.3	23843.7	17977	17664
T-complex protein 1 subunit theta OS=Homo sapiens OX=9606 GN=CCT8 PE=1 SV=4	5.28	60191	22288.1	P50990	35	59.31	0	TCPQ_HUMAN	120623	122633	115803	142279	146506	141364	143501	144920	142418	150876	153995	156020	122788	121879	124811	70280.7	63587.3	58381.7	44457	44492.3	45324.7	121646	125612	117666	112565	105604	100961	136386	133530	122729	152418	137401	134083	121022	132535	126989	104298	107522	114340	43710.3	47318.3
Protein S100-A11 OS=Homo sapiens OX=9606 GN=S100A11 PE=1 SV=2	7.03	11854.5	22247.3	P31949	6	53.33	0	S10AB_HUMAN	91331.3	97985	93106.3	83385.3	78019	82796.3	80916	87178	90539.7	95925	105384	94005	108300	106003	116927	83941.3	78712.3	109706	71203.7	74828	85314.7	54381.3	59969	60680.3	48063	42792.7	45049.7	66762	61201.3	66589.7	89991	72754.3	76135.7	89728.7	83093.7	92717.7	90191.7	89482.5	89546.7	62932	62740
Peroxiredoxin-2 OS=Homo sapiens OX=9606 GN=PRDX2 PE=1 SV=5	5.58	22063	22185.7	P32119	11	42.42	0	PRDX2_HUMAN	171639	174880	158154	173503	173787	177169	176147	179106	183609	199390	199921	198459	171059	202424	207226	123635	113913	142853	120848	136285	169525	134302	148378	146313	142900	138512	133398	137538	165397	162516	132195	167717	185059	187408	156890	144404	165050	158849	165691	154121	136866
Single-stranded DNA-binding protein_ mitochondrial OS=Homo sapiens OX=9606 GN=SSBP1 PE=1 SV=1	10.04	17259.7	22183.8	Q04837	9	62.16	0	SSBP_HUMAN	52450.7	48205.7	50396.7	18595.7	19063	21256.3	17468.7	19246.7	20239.3	30813.3	31244	27792.7	61721.7	62996	66331.7	89203.3	83742	89224	111427	123368	133365	27538	26902	24260.7	23438	28068	29139.3	32929.7	47400.5	31824.7	32473	55489.7	44194.7	75023.3	76075.7	86937.3	85656.7	85689.3	94889.7	93542.3	85319
Ornithine aminotransferase_ mitochondrial OS=Homo sapiens OX=9606 GN=OAT PE=1 SV=1	6.65	48877.1	22026.5	P04181	26	59.45	0	OAT_HUMAN	78958	72738.3	75690	75182	77415.3	80355.3	76446.3	78798.7	76250.3	87619.7	78876.3	90797	68982.7	61238.7	65081.3	27986	24500.3	25746	12557.3	11457	12567	128824	133681	140283	131294	114615	122903	139982	122631	121030	174308	132294	146903	137843	139324	176841	116545	106166	122413	38481.7	43046.3
Histone H2A type 1-H OS=Homo sapiens OX=9606 GN=HIST1H2AH PE=1 SV=3	11.51	13906.3	21531.2	Q96KK5	3	27.34	0	H2A1H_HUMAN	84744.3	51444.1	36844.5	46966.6	47531.2	46159	26369.6	26701.2	25229.6	29223.1	27668.7	31225	4340.69	4240.46	4933.2	27534.3	18355.2	16553.4	27547.2	34110.5	27608.8	38234.6	40960.8	27947.3	39781.2	45682	41287.3	10900	17917.2	24357.9	14264	47280.1	24901.5
Vimentin OS=Homo sapiens OX=9606 GN=VIM PE=1 SV=4	4.86	53708.8	21362.8	P08670	35	77.04	0	VIME_HUMAN	146153	159114	146090	56464.7	57393.7	57470	82733	83733.3	84702	153327	167850	154602	154524	153942	161217	132008	128267	136889	155321	155713	167050	99696.3	100523	92700	79091.8	80912	84794.1	178538	181730	149243	421295	312495	343407	312955	247950	300646	331177	369286	355468	298767	331070
Heterogeneous nuclear ribonucleoproteins A2/B1 OS=Homo sapiens OX=9606 GN=HNRNPA2B1 PE=1 SV=2	9.27	37486.8	21279	P22626	17	64.02	0	ROA2_HUMAN	42561.3	40620.7	46404.7	109107	105661	109251	84980.7	83333	92120	61776.3	66304.7	63868	61930.7	60301	62798.7	46743.3	41520.3	40797.3	51477.3	55582.7	51898.7	138707	124014	129644	127497	82701.7	101138	129473	130668	130038	157987	152143	152937	146103	163460	145305	131646	143554	139687	115008	123827
Heat shock 70 kDa protein 1-like OS=Homo sapiens OX=9606 GN=HSPA1L PE=1 SV=2	5.66	70774.3	21277.3	P34931	18	34.32	0	HS71L_HUMAN				3849.26	4573.22	5408.88	8765.66	6942.77	9554.04	7030.71	8346.15	7117.95	8152.25	8621.37	9955.9							12815.5	12624.6	10855.8	9623.33	8530.34	9164.35	10062.7	13060.8	11076.4	8256.11	12775.4	11508.6	21499.9	15980.6	12877.5	13527.9	16319	15239.1
Proteasome subunit beta type-5 OS=Homo sapiens OX=9606 GN=PSMB5 PE=1 SV=3	6.54	28651.4	21248.8	P28074	15	55.89	0	PSB5_HUMAN	85617.3	89485.3	88761.7	51453.7	49808.3	60770.7	50489	50831.7	61830.3	76381.3	82641.3	75146.3	77387.7	77851.3	87404.3	104271	99444	103954	109609	97066	128592	73178.3	68297	67431.7	66429.7	67206.3	66115.7	82332.7	78092.7	69639.7	98269.3	92354.7	85260.7	94490.3	104500	71316	108085	118521	123863	104538	126685
Carbonyl reductase [NADPH] 1 OS=Homo sapiens OX=9606 GN=CBR1 PE=1 SV=3	8.42	30660.1	21223.3	P16152	13	54.87	0	CBR1_HUMAN	7279	11464	11772.4	32760.8	34742.4	38414.6	32744.7	33498.4	37686.1	40378.6	42096.7	42775	11610.7	11302.1	11320.7	3763	4137.58	4413.72	4958.69	5100.33	5761.66	34535.4	35882.5	31785.6	24966.2	27728.6	27402.6	29037.2	25067.4	25586	35259.9	46150.5	41754.9	25654.5	19188	29874.5	8325.5	6563	9545.5	4472	5329
Ras-related protein Rab-1A OS=Homo sapiens OX=9606 GN=RAB1A PE=1 SV=3	5.86	22905.9	21052.5	P62820	11	63.9	0	RAB1A_HUMAN	6319.33	7529.69	7854.51	16142.1	14638.8	19447.5	16201.2	15543.7	19478.1	16584	18452.8	17750.8	9817.52	10749.9	11138.9	2634.31	3199.53	2835.08	3382	5638.74	4475.35	9723.72	10806.4	8909.3	16366.8	16244.7	16221	14675.1	14392.1	12403.4	8975.55	14936.2	12272	8962.65	8855.21	6773.47	12248.5	13887	10962.5	10935	13019
Peroxiredoxin-4 OS=Homo sapiens OX=9606 GN=PRDX4 PE=1 SV=1	5.87	30768	21035.6	Q13162	11	44.65	0	PRDX4_HUMAN	142550	156319	139595	124084	123736	123367	120335	122979	124721	134997	140666	137969	142839	144130	156665	159019	149790	170310	184604	168902	203918	157300	154345	139699	162254	154378	142621	163721	172901	149042	169389	186957	177288	205326	211746	138782	219126	190855	184356	192948	177353
Protein SET OS=Homo sapiens OX=9606 GN=SET PE=1 SV=3	4.02	33488.9	20930.9	Q01105	14	60.34	0	SET_HUMAN	255018	278307	261265	214335	210629	232101	230173	212968	248459	242485	267748	246322	259821	278246	289410	192986	198289	229591	212029	226332	257512	208443	185541	186117	182730	158499	166677	219406	196929	191102	256920	242048	233297	241107	244848	149121	227123	201957	215219	159761	173186
Proteasome subunit beta type-3 OS=Homo sapiens OX=9606 GN=PSMB3 PE=1 SV=2	6.16	23234.1	20928	P49720	9	47.32	0	PSB3_HUMAN	67226	61799.7	62600.7	46946.3	45309.3	47755.3	45772.7	47547	48758	59622.7	66256.7	61080.7	74038.7	74282	73987.3	79604.3	83119.7	83709.3	90928	103486	93569	49130.7	47321.3	41792	41957.3	38321	39113	46432.7	47728.3	25341	58440.3	63154.7	50502	46991	34300.7	47851.5	56134	30713.3	42848.5	69946.5	59764.5
Lupus La protein OS=Homo sapiens OX=9606 GN=SSB PE=1 SV=2	6.78	47008.2	20795	P05455	31	57.6	0	LA_HUMAN	87354.7	99589.3	97641	142603	148424	152667	144909	158343	201183	151436	160431	157875	129398	131561	131370	27386.3	30054	35471	28297.3	28572	31299.7	85917.7	142109	101297	102297	88101.7	100443	91240.3	94670.7	105184	145271	94586	119232	96585.3	86087.3	69768.7	59267	60019.7	63268.3	25941.3	25541.3
Serine-threonine kinase receptor-associated protein OS=Homo sapiens OX=9606 GN=STRAP PE=1 SV=1	4.81	38780.5	20764.5	Q9Y3F4	18	56.86	0	STRAP_HUMAN	44932.3	45625.3	50048.7	74674.7	75250.7	87804	64328.7	69770.7	75840.3	67316.7	76537.3	71789.3	67031	63230	77812.3	28157.7	27669.3	31194.7	20560.7	18928	22973	71637.7	72096.7	73394	76688	70029.3	69812	64004.7	70113.3	57042	54970.7	79223.7	79121.7	79179.3	89056.3	73544.3	57971.3	61044.3	72748	18309.7	23307.3
Transitional endoplasmic reticulum ATPase OS=Homo sapiens OX=9606 GN=VCP PE=1 SV=4	4.96	90006.3	20639.1	P55072	41	54.84	0	TERA_HUMAN	195423	197315	187841	151018	144956	171628	162364	152056	171339	165576	195390	184891	207599	205852	223805	188998	170250	202939	220925	200279	243005	157982	152226	145017	133860	121196	131774	191891	207166	143571	200556	214269	182227	194172	223474	174355	207955	224761	205166	149159	144290
Glucose-6-phosphate isomerase OS=Homo sapiens OX=9606 GN=GPI PE=1 SV=4	8.49	63375.4	20602.7	P06744	29	60.57	0	G6PI_HUMAN	176416	180246	167451	241451	236885	256238	277978	253311	266035	251324	280910	277625	195070	192344	205810	25878	25596	29852.7	32886	31591	35881.7	234733	231014	210259	242419	207902	231314	228136	239695	214610	233029	240492	231334	194289	243350	167520	96723	109489	105977	29415.7	40089
Cofilin-2 OS=Homo sapiens OX=9606 GN=CFL2 PE=1 SV=1	8.16	18850.7	20594.2	Q9Y281	11	56.63	0	COF2_HUMAN	42015.4	40852.3	40810.6	65121.2	61594.7	65676.8	59157.5	61019.2	60342.3	67746.5	66418.3	72339.5	52253.8	49849.2	45333.5	27272	25901.6	25808.8	25294.3	25677.4	27027.7	50035	42602.8	54858.2	44024	44365	41560.1	57092.7	47136.3	63640	32253.5	58068.2	67318	72669.3	62771.2	59327	39398.6	32121.3	34648.6	22217.7	21840.1
Small nuclear ribonucleoprotein F OS=Homo sapiens OX=9606 GN=SNRPF PE=1 SV=1	4.43	9782.26	20565.4	P62306	4	46.51	0	RUXF_HUMAN	27647.3	22543.3	25059	20118	19689.3	31159.7	21801	19763	29147.7	26252.3	42827	27836.3	28907	25125	39316	37365	31316	40305	22513	32693.3	46014	48503.3	50927	55788	28253.7	23792.7	24699.7	53596.3	54359.7	55993	66869.3	62094	69481	84149.3	78103.7	74206	76683	68073.3	78390	75064.7	72045.7
Jupiter microtubule associated homolog 1 OS=Homo sapiens OX=9606 GN=JPT1 PE=1 SV=3	5.31	16014.5	20454.4	Q9UK76	10	83.77	0	JUPI1_HUMAN	42869.7	43394	45654.3	27633.7	27943	29920	24922	24247	25746	38992.3	47632	43369	53136	54009	60043.7	58585	54296.7	59625.7	69443.3	71881.3	71611.7	54872.3	55496.3	53407	41328	101505	94259.7	66636.3	63102.7	62832.3	61710	72676.7	68317.3	70755.3	81900.3	66463	77598	74752.3	81048	85835.3	86371
Ras-related protein Rab-1B OS=Homo sapiens OX=9606 GN=RAB1B PE=1 SV=1	5.4	22342.3	20414.8	Q9H0U4	11	63.68	0	RAB1B_HUMAN	4864	5656.9	6457.7	12678.2	13639.8	13595	11783.9	14155.9	11190.9	12298	10090.6	13164.1	3599.34	5049.75	4369.49							14939.7	15639.9	20545.7	7751.18	8672.93	8829.76							8113.53	9313.46	6462.05
Rho GDP-dissociation inhibitor 1 OS=Homo sapiens OX=9606 GN=ARHGDIA PE=1 SV=3	4.82	23264.2	20361.7	P52565	13	46.57	0	GDIR1_HUMAN	75363.7	76279.3	76675.3	154290	145688	158070	147684	142555	162451	139167	164025	146498	81768.3	80328.7	85667.3	43618	42334	44162.3	43127.7	45647.7	49754.3	130660	129626	115139	121298	119857	118632	157210	151661	129498	130841	145048	138740	109554	132816	100037	49085	86076.7	84076.3	16197.3	17106
40S ribosomal protein SA OS=Homo sapiens OX=9606 GN=RPSA PE=1 SV=4	4.81	32968.2	20187.3	P08865	16	44.41	0	RSSA_HUMAN	50726.7	49796.3	52771	158754	163504	157344	146846	147137	151246	102422	107212	102543	48210	47537.7	49165	21825.3	21167	22265.7	26574	27502.7	27296.7	145300	156750	153808	145315	154499	137983	150503	149947	137304	147526	132241	134857	111124	104735	96018.7	86076.3	61524	86047	33373.7	34810
Enhancer of rudimentary homolog OS=Homo sapiens OX=9606 GN=ERH PE=1 SV=1	5.55	12430	20113.6	P84090	6	29.81	0	ERH_HUMAN	42419	39542.3	42950.7	21510.3	24186	32850	22434.7	20904.7	29831.7	30767.7	40862	36001	48898	47114	48600.3	63429	60378.3	69806.3	62334	66066	72803.7	42615.3	42055.7	42583.7	42405.3	42175	39883	58757.3	58166.7	59897.3	64153.3	76811.3	83524.7	118193	102399	85741.3	138686	115227	122330	144974	123228
Elongation factor 1-gamma OS=Homo sapiens OX=9606 GN=EEF1G PE=1 SV=3	6.27	50461	19937.5	P26641	24	58.12	0	EF1G_HUMAN	23820	21487.7	22823.3	152906	148326	164672	137364	139100	144855	71600.7	75309	77056	20912	19421.3	23870	13697.7	15089	13648.7	15635.3	17756.3	16137.7	171508	151412	151928	173501	142035	150332	136061	158231	137648	130038	102645	87234.7	51874.7	61948.3	48274.7	52938.3	55762	58340.3	29677	35556
T-complex protein 1 subunit gamma OS=Homo sapiens OX=9606 GN=CCT3 PE=1 SV=4	6.09	61104.3	19932.4	P49368	34	55.78	0	TCPG_HUMAN	73322.3	89818.7	86301	117926	122094	123038	125879	130844	136942	144895	153842	149282	98482.7	99010	113493	21822.3	21070	21277.3	19437	21111.3	18445.3	99603.7	95228.7	103572	94763.7	85389.3	82096.7	101706	92931	90577.7	94488.3	110828	109989	89094.7	77150	66715.3	43714	46060.3	47221.3	18317.3	20019.7
POTE ankyrin domain family member E OS=Homo sapiens OX=9606 GN=POTEE PE=2 SV=3	5.8	122961	19738.1	Q6S8J3	27	28.28	0	POTEE_HUMAN				5070.69	4861.7	4444.01	3596.85	3914.28	3158.15	6824.23	6594.61	6426.82	3006.33	2747.21	3077.7	6504.74	8496.51	6365.89	2930.3	3332.06	3615.58	2813.11	2674.21	2890.42	3326.76	3575.53	4962.46	5063.03	4398.38	3218.92	4629.99	4552.76	3999.94	3894.28	3487.97	3947.5	3128.16	3170.98	3562.49	736.413	3616.72
SAP domain-containing ribonucleoprotein OS=Homo sapiens OX=9606 GN=SARNP PE=1 SV=3	6.07	23727.9	19570	P82979	14	64.76	0	SARNP_HUMAN	29926.3	29048	28060	15394	15042	18409.3	16713.7	14104.3	18978.7	20089.7	26731	19143.7	40474.7	38824	38852.7	37476.3	33676	36939.3	40465	43881	47482.7	54193.3	56789.7	55443	49443	42617.3	43957.3	66857.3	65768.3	67888.7	102446	73129.7	75206.3	85406.3	91003.3	95891	95756.7	90571.3	91830.7	109043	94886
T-complex protein 1 subunit alpha OS=Homo sapiens OX=9606 GN=TCP1 PE=1 SV=1	5.73	60856.9	19502.8	P17987	23	51.44	0	TCPA_HUMAN	82789.3	84686.7	83402	111309	105638	115297	109487	107042	125152	126722	138033	118066	129303	128268	135604	27605.3	28894.3	26774.3	23634	22719.3	24089.3	94925	91575	100003	88470	124190	84027	99096.3	110211	110582	121246	119786	114549	98314.7	108654	92259	78797	74292.7	78229.7	30077.3	31822
Proteasome subunit alpha type-7 OS=Homo sapiens OX=9606 GN=PSMA7 PE=1 SV=1	8.74	28058	19483.4	O14818	17	61.69	0	PSA7_HUMAN	100011	109559	101873	61496.4	68603.9	77914.8	65073.3	71318.6	72408.5	88048.3	96943.7	89186.7	104245	110914	112824	116041	111454	124797	131243	138088	148265	65980.3	65975	59548.8	62901.4	63193.3	64783.8	67775.8	67600.2	68814.6	101512	89906.7	92514.7	97159.3	97156	94081.7	112680	106162	109081	119767	112679
Lactoylglutathione lyase OS=Homo sapiens OX=9606 GN=GLO1 PE=1 SV=4	4.94	21005.9	19381	Q04760	8	53.26	0	LGUL_HUMAN	159905	176919	165723	171478	157537	161802	169115	152256	158298	177195	195746	176605	172658	169048	178590	133582	122472	125677	118290	107888	112091	100008	93398	112780	92929.7	85532	76579.7	123903	115316	130686	153902	147059	173606	200454	146817	120203	135145	125532	131358	53738.3	57677.7
Ubiquitin-like modifier-activating enzyme 1 OS=Homo sapiens OX=9606 GN=UBA1 PE=1 SV=3	5.39	118933	19234.5	P22314	40	50.57	0	UBA1_HUMAN	31056.3	29432.7	31213.7	202229	200403	197908	199187	189075	199245	74760.7	85828	84680	32798.7	31874	35122.7	31036.7	26902.7	31564	26349.3	24360.7	28291	186399	186365	171858	155497	159732	158155	187676	172807	137459	92337.3	102873	49059.3	47141.7	56859.3	52600.3	43636.3	47155.7	51095.3	27441	36643.7
Mitochondrial import inner membrane translocase subunit Tim13 OS=Homo sapiens OX=9606 GN=TIMM13 PE=1 SV=1	8.27	10728.2	19123.7	Q9Y5L4	5	53.68	0	TIM13_HUMAN	29438.3	30824	32848.7	21562.7	23147.3	22432	22752.3	21390.3	21330.7	30890.7	30016.3	33835.3	28612	27360.3	26639.3	23694.7	23926.3	22983.3	29271.3	27329	25788.7	35148	34422.7	33897.3	28641.7	26862.3	24051.3	47537	41853.7	40460	47205.7	50300.7	53129.7	68352.3	59136.3	50674.7	33865	37456.7	38303.7	34672	15191
Actin_ alpha cardiac muscle 1 OS=Homo sapiens OX=9606 GN=ACTC1 PE=1 SV=1	5.08	42361.2	19113	P68032	21	52.79	0	ACTC_HUMAN	229959	257736	220485	306552	275705	340362	278864	255943	319378	227418	264328	249334	184942	189210	227121	151741	132238	167139	176061	163491	209400	185545	194926	274730	199939	173479	109150	217344	226496	247544	135610	186059	264211	237189	199645	118625	79901.9	61382.2	74294.7	56942.9	47745.1
Pterin-4-alpha-carbinolamine dehydratase OS=Homo sapiens OX=9606 GN=PCBD1 PE=1 SV=2	6.37	12056.7	19110.5	P61457	8	73.08	0	PHS_HUMAN	46432	43316	44333.3	22915	24741.7	24589.7	25563.7	26967.3	29205.3	33928.7	37363.3	32660	42315.7	40249.3	47103.3	57112	53289.7	52858	52580.3	57477	60285.7	26489	25382	25720.3	29296.7	26193.3	16249.3	27467.7	26188.3	29144	31259.7	35655	36341.3	46090	43813.3	38286.3	50520.7	40521.3	50893.7	58715.3	59436.7
Myristoylated alanine-rich C-kinase substrate OS=Homo sapiens OX=9606 GN=MARCKS PE=1 SV=4	4.26	31725.8	18867.2	P29966	15	68.67	0	MARCS_HUMAN	44746	39510.7	42273.7	43889.3	40073.7	67326.7	44797.3	41427.7	72187.3	39189.7	68576.7	41957	54435	54562.7	83153.7	61880	53756.7	79912	65169.3	71701.3	106682	68176.7	67245	68506.7	68895	54574.3	55852	90741.3	85698	76360.3	108596	103379	93152.7	98446.3	122253	116361	103612	123453	132537	116169	130651
Heat shock-related 70 kDa protein 2 OS=Homo sapiens OX=9606 GN=HSPA2 PE=1 SV=1	5.42	70306.2	18717.1	P54652	30	51.96	0	HSP72_HUMAN	10951	10876.9	9802.48	13792.5	13805.6	14593.8	10191.4	9500.49	9867.01	7015.97	8206.65	7638.52	8893.85	8647.36	9942.04	9096.08	8297.59	9007.97	15504.9	15865.9	22612.2	20654.2	20284.4	17247.5	13791.5	9900.11	9906	17694.5	14508.6	13819.8	13757.3	20152.7	24320.1	15754.5	21977.8	11865.1	36658.6	38330.6	35943	65890.8	64432
Eukaryotic initiation factor 4A-II OS=Homo sapiens OX=9606 GN=EIF4A2 PE=1 SV=2	5.17	46630.5	18703.8	Q14240	26	67.32	0	IF4A2_HUMAN	10841	10685.2	10248	14992.9	16537.7	32294.3	13775.3	15265.6	32575.3	17406	33264.7	17304.9	11784.4	12421.4	21283.4	9629.92	9423.1	15133.1	11449.8	11880.7	11388.8	53798.9	55954.2	54709.5	92731.4	69395.3	93510.6	48787.7	44200.6	47339.1	56478.6	50780.2	52276.3	41599.9	33907.6	15026.8	41972	41742.4	41637.4	10317.6	12139.3
ATP synthase subunit beta_ mitochondrial OS=Homo sapiens OX=9606 GN=ATP5F1B PE=1 SV=3	5.1	56560	18682.2	P06576	24	64.65	0	ATPB_HUMAN	94345.3	102804	101730	59422.3	58914.7	61364	52145.7	55543	56005	57159.3	59732	58171	106386	111812	112911	132478	126880	135750	95666	103410	101671	140777	140354	125300	112674	123354	120480	143247	145517	128389	164724	184104	163626	193829	206304	150682	218465	195067	173979	71760.3	77051.7
Protein canopy homolog 2 OS=Homo sapiens OX=9606 GN=CNPY2 PE=1 SV=1	4.62	20994.4	18672.5	Q9Y2B0	9	51.1	0	CNPY2_HUMAN	63272.7	65049.7	64935.7	33484.7	36138	36684.7	43055.3	32005	38862.7	56459.7	48512	55415.7	66523	62297.3	79230	78077	74136	88366	81113.7	86052.3	105480	56541	55878.3	46312.7	57217.3	48239.7	48934	64679.3	61387.7	52252.7	76512.7	77908.7	77112.7	85090	108469	85745.3	91455.3	94261	110863	91395.7	107511
Superoxide dismutase [Cu-Zn] OS=Homo sapiens OX=9606 GN=SOD1 PE=1 SV=2	5.7	16163.9	18659.3	P00441	5	35.71	0	SODC_HUMAN	92638	70485.3	97129	17685.7	102158	32282.3	45681.3	60257	29831.7	123514	31995.3	52054.7	76100.3	118849	49276.7	79493.7	103964	43086.7	32918.3	87795.7	46498	13422.7	31350	23094.7	41927.5	20528	24887.5	39987.5	70719	35068	18978.7	19143.7	43157.5	94998	35814	5165.5	57838	57858	57943.5	65169.5	64749
Tubulin beta-3 chain OS=Homo sapiens OX=9606 GN=TUBB3 PE=1 SV=2	4.64	50889	18406.3	Q13509	16	37.56	0	TBB3_HUMAN	4306.65	4333.7	5095.65	6147.49	6520.24	8403.73	7742.33	8536.92	13095.1	5692	6916.22	5725.66	7766.38	9179.18	11483.1	4313.09	4591.17	6311.36	2727.87	2788.42	4249.98	14054.4	12952.4	10929.9	4736.47	4083.27	4125.38	10215.7	8880.36	4914.64	20217.9	24817.3	19544.7
Tubulin alpha-8 chain OS=Homo sapiens OX=9606 GN=TUBA8 PE=1 SV=1	4.76	50778	18380.3	Q9NY65	16	47.66	0	TBA8_HUMAN				10679.7	20869.9	14440.7	4852.58	7919.62	6688.77	2549.32	1727.71	976.943	245.638	892.014	479.822							6323.12	6800.06	5588.97	8189.37	7629.99	8030.8	7138.18	6780.37	5994.84	5859.58	5934.79	5819.03
Putative heat shock protein HSP 90-beta-3 OS=Homo sapiens OX=9606 GN=HSP90AB3P PE=5 SV=1	4.51	68667.1	18307.9	Q58FF7	24	30.32	0	H90B3_HUMAN	20629.6	19427.6	18237.9	21408.8	19304.2	20885.2	25147.9	21285.8	27139.8	32841.9	34890.1	29458.7	28371.1	28879.2	27733.1	19339.8	13212.6	20409.9	7230.67	7249.38	6956.17	28289.1	27776.2	16160	12816.5	22560.2	20598.5	34266.5	30737.3	19232.6	19146.1	15913.5	27470.2	29006.9	21110.2	23178.6	22607.1	21129	35861.3	27388.6	27342.3
Aspartate aminotransferase_ cytoplasmic OS=Homo sapiens OX=9606 GN=GOT1 PE=1 SV=3	6.6	46475.7	18222.5	P17174	25	70.22	0	AATC_HUMAN	80795.7	83159	82992	50372	48168	50347.7	51333	50662.3	52165.7	65616	64484	69366	79813.7	81292.7	81520.7	104772	93935.7	96231.3	104597	116034	113119	44025.7	46659.7	47193	43362.3	44548	42223.3	53923.3	52228.7	53255.3	75200	65500.7	61923	65796.7	74426.7	73156	84795.3	86144.7	82149	109796	98171.7
Eukaryotic translation initiation factor 3 subunit I OS=Homo sapiens OX=9606 GN=EIF3I PE=1 SV=1	5.28	36901.1	18149.9	Q13347	14	47.38	0	EIF3I_HUMAN	6451.67	7734	5894	63897.3	65774.7	62012.7	40286.7	42589.7	42103.3	11489	10799.3	11817.7	6329.67	7306.33	7027	9773	8661	2997	7021.5	5441	6712.33	61573.3	63929.3	60058.3	60497	56688.3	58423	38636	38630.7	39467.7	14070.7	14809	17013.3	18897.7	19134.7	5908.33	18582	17052	18979.3	15545.5	12208.3
Calumenin OS=Homo sapiens OX=9606 GN=CALU PE=1 SV=2	4.28	37220.9	18103.3	O43852	28	78.73	0	CALU_HUMAN	57279.3	58709.7	63707	41332.3	39807	43417	42040.7	40067.3	39457.3	49220.3	52253	49676.7	68847.7	63924.3	69188	83526.3	73213.7	72222	90118.3	90761	91047.3	60113.7	61529	57140	60712.3	74480.7	70007.7	62886.3	57698.7	60950.7	79991.7	75927.7	71048	86266	84997.7	82576.3	98416	93075.3	94825	126169	118476
T-complex protein 1 subunit eta OS=Homo sapiens OX=9606 GN=CCT7 PE=1 SV=2	7.53	59880	18067.2	Q99832	25	49.91	0	TCPH_HUMAN	79652.3	99342.3	97629	120481	112126	124022	115338	118695	117310	139385	147015	146428	86743.3	83097.7	89735	40667.7	40061	41026.7	24872	24161.7	24269	118642	116731	109012	99949.7	97696.3	91313	115029	122478	103328	147305	129120	119628	96023	107601	102157	77731.3	80317.3	81576.3	22472	25774.3
Proliferation-associated protein 2G4 OS=Homo sapiens OX=9606 GN=PA2G4 PE=1 SV=3	6.14	44129.1	17918	Q9UQ80	21	59.9	0	PA2G4_HUMAN	30783.7	29435.7	31153.3	119845	132311	128970	114779	111904	120893	69891	68526.7	69972.7	30740.7	30604.3	29975.3	23306.3	22733.3	21805.3	28232	27449	30806	108036	110436	107425	100660	104910	101326	104338	109453	103728	80304.3	71642.3	69826	41685.3	41924.3	39030.7	32375.7	33502.3	33991.3	24503	22673.7
Heterogeneous nuclear ribonucleoprotein H OS=Homo sapiens OX=9606 GN=HNRNPH1 PE=1 SV=4	5.88	49514.7	17904.7	P31943	15	50.11	0	HNRH1_HUMAN	13647	15361.7	15606.3	76821.2	71084.9	81205.1	43628	40888.3	48622.4	29323.7	33867.4	30541.8	19430.1	18420.7	21989.8	14200.4	13373.1	13917.3	14106.8	17261.8	15356.2	141761	122724	115367	121034	106470	119805	82833.7	85032.8	81515.7	78216.7	95263.6	78277.5	43656.4	33321.6	20966.8	14426.1	14042	15521	16801	15741.9
6-phosphogluconate dehydrogenase_ decarboxylating OS=Homo sapiens OX=9606 GN=PGD PE=1 SV=3	6.89	53653.3	17822.4	P52209	21	44.1	0	6PGD_HUMAN	35414	26870	33202	118525	115191	122738	131150	123005	134005	141560	146904	141663	38884.7	36808.7	38055.3	11161.7	11942.3	14903	13723.7	15005.7	13550.3	110936	113325	85058.3	77110	91800	90895.7	125001	126034	99246.3	150221	126429	97611.3	47109.3	58118.3	55522.3	31761.7	31153.7	35542	21933.7	23043.3
Heterogeneous nuclear ribonucleoprotein D0 OS=Homo sapiens OX=9606 GN=HNRNPD PE=1 SV=1	7.92	38605.3	17680.2	Q14103	12	29.3	0	HNRPD_HUMAN	57989.7	64498	63159	85452.7	81640.1	88474.3	67367.3	69358.3	66597.8	70792.3	73977.1	72851.3	77648	78272.3	68112.7	73643	72048.7	64372.5	77934.7	85304	72951.6	87550.7	90538.3	84097	77609.9	76675.7	76523.3	102694	99879.4	92473.4	99507.4	108809	109049	112289	84639.6	77035.3	112654	121128	114628	99449.7	110557
Prefoldin subunit 4 OS=Homo sapiens OX=9606 GN=PFDN4 PE=1 SV=1	4.22	15428.3	17646	Q9NQP4	5	41.79	0	PFD4_HUMAN	23630	35920	39724.3	21412.3	23184.3	24695.7	25788.7	26587.3	26986.3	35217	38909.7	34366.7	47602.3	45354	51321.7	35820.7	46796.3	45842.7	44641	47964.3	46724.7	20505.3	19253.3	17953.7	19734	20197	19008.7	23451.3	21120.7	12506.7	31925	31534.7	26317.7	25790.3	13452.7	15113	8904	8082.5	7936.67		3359
Keratin_ type I cytoskeletal 10 OS=Homo sapiens OX=9606 GN=KRT10 PE=1 SV=6	4.96	59055.3	17628.3	P13645	26	45.38	0	K1C10_HUMAN	190047	201584	185987	125655	134041	140324	112460	119519	130869	135596	143312	136426	151620	157182	155774	184528	199814	219846	161297	164532	179425	130680	109223	133253	75695.3	105511	102115	164264	195443	177781	124291	131485	145472	183374	174061	181078	188511	167105	202958	262748	232158
Protein-L-isoaspartate(D-aspartate) O-methyltransferase OS=Homo sapiens OX=9606 GN=PCMT1 PE=1 SV=4	6.85	24807.5	17325.9	P22061	11	61.23	0	PIMT_HUMAN	21606	17594.7	18776.7	43921.7	46748	41549	37074.7	37562.3	32929	51055	45684.7	49780	14297.3	14411.7	14319.3	6630.33	7370	7368	9007.33	8840.33	7983	32514.3	29604.7	34409.3	28128	27914.3	29255.7	37273	32792	35734.3	32069	42548	49111.3	36267.7	29536.7	42177.7	15448.7	22515	20745	15793.5	11715.7
Peptidyl-prolyl cis-trans isomerase FKBP3 OS=Homo sapiens OX=9606 GN=FKBP3 PE=1 SV=1	9.95	25233.9	17093.2	Q00688	10	39.73	0	FKBP3_HUMAN	37956	36804.3	38729.3	70902.7	73980	80303.3	64214	72162	73663	45226	50622.7	48518	48618	47883.3	46204.7	35480.7	30900.7	30158	53852	56062.7	51091.3	56315.3	53364	57721	54762	52208.7	48155.3	70437	68240	68803.7	82428.3	74079.3	78647.7	73053.3	66131	47496	60364.7	51253.3	56640.7	39595.3	38837.3
Receptor of activated protein C kinase 1 OS=Homo sapiens OX=9606 GN=RACK1 PE=1 SV=3	7.57	35533	17084.2	P63244	11	35.02	0	RACK1_HUMAN	27515.3	22799.3	23241.7	101497	99788.3	107877	90813.3	88109.3	94198.7	51042.7	53358.3	51723	20514	20934	20013.7	7014.5	8231	8550.67	10045.3	9879	9742.33	119580	119509	112907	95574.7	87840.7	100075	110021	104832	97261.3	61021.7	79906	79370.3	63945	67590.7	70654.7	24087	17887.3	22639	13124	21984
Parathymosin OS=Homo sapiens OX=9606 GN=PTMS PE=1 SV=2	3.93	11529.9	17068.7	P20962	5	27.45	0	PTMS_HUMAN	90719	91920.7	86889.7	70084	67363.3	40428	76533.7	71102	66544	84503.3	77626	82643.7	106457	102183	187839	95692.7	86835.7	159019	109136	114107	201665	34998.7	36685	31621.7	32617.7	29781.7	32388.7	44138	46719	35131.7	46240	47235	41052.3	63163	53263.7	2463	117446	59418	67016.5	101823	117569
T-complex protein 1 subunit zeta OS=Homo sapiens OX=9606 GN=CCT6A PE=1 SV=3	6.26	58480.5	17063	P40227	21	40.11	0	TCPZ_HUMAN	97624	105163	95061	125109	135105	126908	130534	137826	135249	143705	152865	146675	98446.4	104872	102774	29114.3	29926.1	27984.9	25912.3	28617.3	27257.7	87162.5	86901.3	91219.9	93130.8	88190.5	85716.5	94081.2	95929.8	95916.7	107383	108698	110168	83033.3	80741.4	78782.7	49567.3	53156	53351.3	19135.4	19171.5
40S ribosomal protein S28 OS=Homo sapiens OX=9606 GN=RPS28 PE=1 SV=1	11.31	7898.07	17025.1	P62857	3	36.23	0	RS28_HUMAN	26146.5	27506.5	29207.5	11719	10780	13280.5	15537.5	13223.5	14392.5	10160.5	13111	13503.5	24064	19677.5	20795	20825.5	18983.5	22495.5	32556.5	32698	33100	39512	38403	41670	20237.5	12806	12993.3	51226.5	52072	23598	99375	48337	68618.5	70850.5	35315.5	43104.5	18326	35768.5	22236.5	45105	27307.5
Heterogeneous nuclear ribonucleoprotein F OS=Homo sapiens OX=9606 GN=HNRNPF PE=1 SV=3	5.25	46014.1	16979.8	P52597	14	46.51	0	HNRPF_HUMAN	26521.8	23413.2	18911.8	64508.3	63199.4	67747	39456.2	49479.4	49744.8	35790.7	36611.2	31991	25538.3	29697	30871.2	20980.9	18853.9	22198.1	18437.6	22698.2	24453.4	67260.7	70489.8	65123.3	70236.2	64660.5	67106.5	59919.3	57873.7	61401.7	92636.7	65197.6	54835.3	54487.3	51846.7	83341.3	41870.7	38695	43625	24555	28312.7
Adenosylhomocysteinase OS=Homo sapiens OX=9606 GN=AHCY PE=1 SV=4	5.92	48286.5	16971.5	P23526	16	40.05	0	SAHH_HUMAN	144889	160679	141174	154862	159067	160981	162600	164161	172983	180673	198653	185124	164251	163258	174483	85968	83327	89319.7	27952	26917	29790.3	137093	139813	144680	133611	125626	127029	151349	162930	142314	168434	152206	156442	141000	142434	145574	110321	120404	119432	20984.7	22561.3
Myosin light polypeptide 6 OS=Homo sapiens OX=9606 GN=MYL6 PE=1 SV=2	4.36	17101.2	16881.6	P60660	9	66.89	0	MYL6_HUMAN	53127.9	56189.9	55809.4	91166.6	94777.2	94079.3	92973.7	95542.6	99776	73627.1	70600.6	77996.3	69953.1	72246.8	71634.9	63242.6	57173.9	57040.8	70056	81544.5	75818.3	86516.1	96915.3	89715.4	76434.9	88564.1	73690.6	57040.4	55119.5	54535.8	53305.6	68178.3	45433.3	80494.8	77923.5	78464.6	90157.8	90027.6	81877.8	100019	97945.9
Acetyl-CoA acetyltransferase_ mitochondrial OS=Homo sapiens OX=9606 GN=ACAT1 PE=1 SV=1	9.21	45484.8	16822.9	P24752	24	55.97	0	THIL_HUMAN	12804.7	13316	13560	48309.3	46845.7	58230.7	46294.7	46082	55781	51539	63656.7	52439.3	11711.3	12631.3	13570.3	9242.33	10899.5	7096.33	8454	8806.5	6598	82919	83126	77047.7	69814.3	70629.7	71998.3	73260.3	74005.7	58747.7	87447.3	75486	66053.3	28714.3	30945.3	29941	14253	14230.3	15376.3	10365.3	10749
T-complex protein 1 subunit delta OS=Homo sapiens OX=9606 GN=CCT4 PE=1 SV=4	7.79	58437.6	16802.8	P50991	25	55.29	0	TCPD_HUMAN	75452	76605.3	76813	119159	125001	122329	126983	132613	131466	141624	147188	143681	93015.7	99455.3	91273	21909	21763	21416	19966.3	22348	23972	107381	112706	92432	96630.7	82288.7	85987	104396	108076	97168.3	114762	139033	102400	92032.7	101308	87456	48848.7	48108.7	50869	22686.7	25671.7
Stathmin OS=Homo sapiens OX=9606 GN=STMN1 PE=1 SV=3	5.67	17302.5	16795	P16949	14	56.38	0	STMN1_HUMAN	46053.7	57010.3	60863	63303.7	69707	66887	60600.3	64634.3	61280.7	75152	67071.7	80104	105434	105264	92236.7	80238.3	75221.3	67057	93139.3	108359	94839.7	53207	54461.3	49226.3	60467.3	60270.7	57864.3	67003.7	66469.3	51013	75180.7	79615.3	67921.7	71367	59902	55382.3	57799.3	57232	56803.7	60056.3	59094.7
DNA-(apurinic or apyrimidinic site) lyase OS=Homo sapiens OX=9606 GN=APEX1 PE=1 SV=2	8.14	35953.7	16767.3	P27695	13	40.57	0	APEX1_HUMAN	7842	8669.5	8078.33	59374.3	63881.7	67676.3	56921.3	60150	66133	18629.7	21090.7	19445.7	6732.67	7120	7912	6326	6833.5	6090.5	8361	8879.33	11202	54026.3	52107.7	49759	47311	50605	51599.7	45453	45429	44075.7	17829.7	11047.7	12217.3	7945	7213.33	8648	8240	7459.67	7125.67	8669.5	8061.67
Thioredoxin-dependent peroxide reductase_ mitochondrial OS=Homo sapiens OX=9606 GN=PRDX3 PE=1 SV=3	7.7	28034.8	16520	P30048	8	30.86	0	PRDX3_HUMAN	195074	191245	188836	131766	132958	135702	142383	137699	142859	151541	159120	160725	186457	186674	215039	166809	148349	157925	150721	155619	153081	159548	153511	183783	166605	120274	132105	160610	191554	194041	153212	212022	230987	249328	186994	50112.3	253588	209177	199591	208142	170424
T-complex protein 1 subunit epsilon OS=Homo sapiens OX=9606 GN=CCT5 PE=1 SV=1	5.31	60127.4	16508	P48643	31	60.44	0	TCPE_HUMAN	101804	103227	98345	128714	119910	130736	130693	124354	137916	130589	146558	131228	109009	112958	123337	53997	44869	57930.3	31189.3	31398	36438.3	96557.7	96110.3	97740	87553.3	76539	81029.7	108257	123197	111075	116327	124074	124571	115551	128731	99634	100096	93323.7	101653	32475.3	39056
Protein disulfide-isomerase A6 OS=Homo sapiens OX=9606 GN=PDIA6 PE=1 SV=1	4.76	48520.6	16434.9	Q15084	23	51.59	0	PDIA6_HUMAN	101801	123901	116564	115816	119454	113799	112521	118925	118229	134551	135316	140409	111225	112924	111687	112704	104143	102750	126640	123113	126033	141696	143327	131526	118791	118990	115702	152975	145924	118018	144794	167594	151941	139343	139454	112173	100272	103186	106994	64483.7	82237.7
Programmed cell death protein 5 OS=Homo sapiens OX=9606 GN=PDCD5 PE=1 SV=3	5.69	14285.1	16429.5	O14737	9	67.2	0	PDCD5_HUMAN	49989	50121.7	54551	44722	43072.3	46450	42800.7	42285.7	42971.3	48272.7	52231.3	56853.3	63679.3	65042	55919	69248.7	64625.7	61517.7	72873.7	74052	76595	50796.7	50397	54947	50544.3	42090	41516.7	57439.3	55733	61981	63199.7	66519.7	80758.3	81858.3	72269	62941	61147	60191.3	68245.7	36856	30141
Heat shock 70 kDa protein 4 OS=Homo sapiens OX=9606 GN=HSPA4 PE=1 SV=4	4.91	95186.5	16425.1	P34932	49	58.81	0	HSP74_HUMAN	22253	19994.7	21829.7	114444	115868	116492	118551	113400	110706	103882	120040	107841	22072.7	21572.3	23910.7	16414.3	15422.7	17210	19204	20423	20319.3	105139	106168	85901.7	76456.3	83961.3	87446.3	109603	111527	94891.3	106216	113535	97311.7	36461.7	43611.3	40237	32859.7	35554.3	37280.3	24215	25077.7
Ubiquitin carboxyl-terminal hydrolase isozyme L1 OS=Homo sapiens OX=9606 GN=UCHL1 PE=1 SV=2	5.19	25166.6	16421.3	P09936	10	44.84	0	UCHL1_HUMAN	137924	146756	135829	188189	181153	182718	177771	172946	156615	185065	193041	178453	148931	145199	135355	129577	120731	123587	143541	140972	146701	132162	134734	130064	114201	96857	101689	151794	145964	162533	173985	161588	175166	158780	136277	138000	145212	132739	136231	111386	101127
40S ribosomal protein S16 OS=Homo sapiens OX=9606 GN=RPS16 PE=1 SV=2	10.79	16559.4	16156.4	P62249	8	46.58	0	RS16_HUMAN	21686	11621	11721.3	29556.3	31624.3	29676	28063.7	28935.7	24064	18424.3	15145.3	21549.7	12815	11094.3	9981	8569.5	12328	6028.33	13337.3	12909.7	12302	6342.67	8642	7742	7272.33	5152.33	4893.67	9613.33	10456.7	11374.5	10555	5655	5267.67	11914	4031				3474
Protein disulfide-isomerase A4 OS=Homo sapiens OX=9606 GN=PDIA4 PE=1 SV=2	4.77	73274.7	16131.4	P13667	44	63.41	0	PDIA4_HUMAN	79803.3	89736	88667.7	105520	107129	106288	103140	107688	103002	101028	92804.7	99840.7	103045	100665	97854	101254	100416	98821	110608	113737	119766	128864	123899	110780	113347	107418	117621	110832	108859	101840	126109	111055	96403.3	90437	92985.7	101497	103726	93511.7	97899	106996	90617.3
Small nuclear ribonucleoprotein Sm D1 OS=Homo sapiens OX=9606 GN=SNRPD1 PE=1 SV=1	12.07	13281.6	16110.1	P62314	5	54.62	0	SMD1_HUMAN	49142.3	55753.3	58685.3	41796.3	42511	49716	40648	49489.7	48466.7	58986	71485.3	59349	69984.3	72223.3	71144	65927	72326.7	68164.3	67464	80861.3	84392	80874.7	86109	74728.7	78450.7	45681	86168.7	79825.3	79667.7	70713	89977.3	101228	79559.3	82496	86033	79239.3	86677	105602	96280	42552	63052.3
Heterogeneous nuclear ribonucleoprotein A1-like 2 OS=Homo sapiens OX=9606 GN=HNRNPA1L2 PE=2 SV=2	9.36	34396.5	16048	Q32P51	13	44.69	0	RA1L2_HUMAN				11355	12264.2	13356.9	12679	13229.6	15414.7													78504.9	73935	63145.9	40262.8	33337	38295.3	32457.9	29314.7	24043.7	67974.9	52075.2	56997.5	73036.6	66674.9	74255.3	38390.7	63377.2	63973.7	39242	47553.9
Proteasome subunit alpha type-5 OS=Homo sapiens OX=9606 GN=PSMA5 PE=1 SV=3	4.54	26582.2	15954.1	P28066	9	38.59	0	PSA5_HUMAN	102237	106123	102907	76508.7	81697.7	93785.7	88186.3	83852.3	79287	92279	91300.7	99293.7	117704	120953	135089	124924	119898	132639	137763	148350	162929	51500.7	62376	60785	59397	58721	56073.3	80318.7	68459.3	73253	106213	69122	82874	94188.7	87802.7	103960	105659	104864	99446.3	92499	100664
Eukaryotic translation initiation factor 1A_ X-chromosomal OS=Homo sapiens OX=9606 GN=EIF1AX PE=1 SV=2	4.88	16574.5	15824.4	P47813	5	26.39	0	IF1AX_HUMAN	54221	36010.5	32847	40969.5	38638.3	36541	39581	36891.3	102140	38191.3	92525	52029	38374.5	28527	61612.5	5399	5339	4398	9543	11542	3777	33751.3	44219.5	38314.5	31079	20640	30541.7	31605.5		69264		21944	50139.5	68959
14-3-3 protein eta OS=Homo sapiens OX=9606 GN=YWHAH PE=1 SV=4	4.56	28389.9	15793.1	Q04917	16	55.28	0	1433F_HUMAN	45358	44621	46508	49899.3	54990.7	62077.7	55662.3	60898	61915.3	66984.3	75698.7	72836	54955.7	56726	56602.7	14257.1	13940.7	20569.3	14544.7	15531.7	21516	39292.7	42881.3	38746	33279	33401.3	33370.7	49028.3	50077.7	43622	63048.9	56999.3	52154.7	45564.3	52771	44459.3	27597.7	29137.8	31669	16629.3	18820.7
Histone H2B type 1-C/E/F/G/I OS=Homo sapiens OX=9606 GN=H2BC4 PE=1 SV=4	10.99	13906.2	15776.5	P62807	8	50.79	0	H2B1C_HUMAN	16562.8	12985.8	15207	24121.7	23939	18930.7	11934.7	11394.1	17218	11610.5	11206	11910.5	6041.4	6098.27	9924	7359.39	7140.1	9807.5	14354.9	14910	18502	26576	27895.5	29273.5	29319.5	13660.2	19063.5	23841.1	22069.4	25373.6	33431.4	26726.6	25536.5	29465.1	36371.7	43817.1	19275.2	22882.7	24196.7	26156.8	38045.4
60S acidic ribosomal protein P1 OS=Homo sapiens OX=9606 GN=RPLP1 PE=1 SV=1	4	11628	15689.8	P05386	2	20.18	0	RLA1_HUMAN																									7728.92	15338.4	6616.06
Transketolase OS=Homo sapiens OX=9606 GN=TKT PE=1 SV=3	7.49	68562.1	15641.4	P29401	32	51.69	0	TKT_HUMAN	178044	199737	191024	167770	161006	162267	174156	160151	178902	191834	207820	200482	212082	219817	230140	186652	179585	201885	229346	210597	244371	143057	139890	116031	113332	125320	123469	145219	136126	122922	147222	163930	137176	139846	153106	120953	130332	142110	159287	126949	104925
ATP-citrate synthase OS=Homo sapiens OX=9606 GN=ACLY PE=1 SV=3	6.98	121752	15613.5	P53396	51	51.14	0	ACLY_HUMAN	13699.3	15179.3	14644	86024	85383	87536.3	87059	88459	90279.7	53588.3	56490.3	59907	16083.3	17120.3	9347	10849.7	13031	8469.33	12737.7	14334	7288	56707.7	57832.7	67108	46696	47386.7	51339.7	60853.3	55986.3	54363	35796.7	27450	37487.3	15741	12733.7	9110.33	11232.7	8019.67	8844.33	7506.5
Tubulin beta-6 chain OS=Homo sapiens OX=9606 GN=TUBB6 PE=1 SV=1	4.58	50313.5	15464.1	Q9BUF5	15	40.81	0	TBB6_HUMAN				4822.1	6042.98	11986.3	5711.18	5953.69	10664.6	5598.98	8827.37	4714.24	3145.41	5570.2	8125.22				2309.24	2473.62	2598.69	5236.98	5804.92	6447.7	4710.52	3601.54	4132.81	5510.86	4779.83	5355.24	4512.75	5587.14	6998	5033.77	3351.33	1891.87	3033.87	2644.07	3025.6
Nuclear migration protein nudC OS=Homo sapiens OX=9606 GN=NUDC PE=1 SV=1	5.1	38300	15441.4	Q9Y266	26	60.42	0	NUDC_HUMAN	37162.7	36949.7	35873.7	120187	113053	109990	111523	110209	107953	105773	106698	105079	40863.7	39347.3	41288.7	35369.7	21841.7	29089.7	28507.7	28191.7	29118.7	108325	114284	107059	104381	98011.3	93947.7	114468	115206	109597	120861	117125	113521	73633.7	77350	64155.7	51105.7	48910.3	55181.3	38811.7	41692.7
Heat shock 70 kDa protein 6 OS=Homo sapiens OX=9606 GN=HSPA6 PE=1 SV=2	5.75	71484.5	15426.3	P17066	23	41.06	0	HSP76_HUMAN	8218.71	8990.85	8165.54	7060.09	7571.11	7684.55	7807.44	6750.53	7586.46	7837.4	8760.82	8573.23	17274.7	18287.3	17934.5	7011.56	6784.04	6945.23				19635.1	20093.5	18023.7	9316.95	9928.86	9325.1	7914.41	13353	7183.83	7823.68	12400	7741.37	8978.16	6360.35	6934.67	8732.38	8827.14	9007.12
Adenylate kinase 2_ mitochondrial OS=Homo sapiens OX=9606 GN=AK2 PE=1 SV=2	7.85	26705.9	15200.1	P54819	16	66.95	0	KAD2_HUMAN	42067	40298	44504.3	74345.7	73665.3	81063.3	72118.3	77155	78149	67555.7	68714.7	65846.3	45903	47291.7	45604	39856	37262.7	36153.7	29691	27117.3	26009.3	110294	103144	89876	101313	97838.7	98427.7	121457	120281	96949.7	109756	117801	94202.7	92926.7	98975.7	95082.7	69857.3	68699	74108.7	24210	23677
X-ray repair cross-complementing protein 6 OS=Homo sapiens OX=9606 GN=XRCC6 PE=1 SV=2	6.23	70128.3	15095.8	P12956	38	61.08	0	XRCC6_HUMAN	40848.3	37988.7	38445.7	129727	125066	130511	111525	112176	114366	70781.7	77378.3	73703.7	44726.7	39549	42782	19001.3	18121.7	19157.3	27408.7	26201.7	30084.3	123229	127282	114252	95243	88444.3	98739	101762	106069	98533.3	78450.7	80247	80208	74270	76055	60241.3	42116.7	44055.7	44196.3	24743.3	29204.7
Proteasome subunit beta type-1 OS=Homo sapiens OX=9606 GN=PSMB1 PE=1 SV=2	8.22	26717.5	14940.6	P20618	13	56.43	0	PSB1_HUMAN	85689	81487.3	85673	61096	57659	62250.3	59358.7	58609.3	61370.7	77135	86470	81925.3	75261	68662.7	78678	115097	102996	114171	114932	116796	132522	74109.3	73698.3	64996.3	47712.3	81228	48624.7	75181	76753	72102	78725.7	83306	76059	90353.7	107531	82258.3	97817	107981	108537	81142	86128.7
Myotrophin OS=Homo sapiens OX=9606 GN=MTPN PE=1 SV=2	5.14	13065.9	14933.2	P58546	3	16.95	0	MTPN_HUMAN	10654.5	10259.3	11154.7	10783.3	11207	10163.3	11741.3	12409	7569.67	14411.7	13642.3	13131.3	16318.7	15199.3	14470	14101.7	11474.3	10296.7	15867.7	14979.7	15020.7	14079	19819	17733	22081.5	24227	21219.5	6445.5	22804.5	15385.3	16683.3	17671.7	17004.3	13826.7	21327	11211	11770.7	9315	18277	4745	16712
Elongation factor Tu_ mitochondrial OS=Homo sapiens OX=9606 GN=TUFM PE=1 SV=2	7.39	49883.8	14914.7	P49411	25	56.42	0	EFTU_HUMAN	53156	55242.5	52623.5	81937	81711	81488.7	66187	60782.3	63035.7	28207.3	33835	31672.7	19637.5	18877	16817	93922.5	115405	114697	24895.5	26637	31227	95458.3	94443.3	89230.3	75898	77765.7	71241.3	52051	49331.7	47524.3	16050.3	19629.3	19568	36034	35227.7	8087	28711.7	27243	27155.7	100381	46974.7
Spliceosome RNA helicase DDX39B OS=Homo sapiens OX=9606 GN=DDX39B PE=1 SV=1	5.32	49447.7	14852.1	Q13838	23	55.37	0	DX39B_HUMAN	65064.3	55014.7	68755.3	83940	85592.8	92276.6	84202.9	86737.9	86708	112339	117087	107858	67948	60849.3	63340.8	67598.7	28963.7	63156.3	33033.7	35097.7	38517.3	81934.9	86053.7	93683.1	97893.2	89825.3	91311.7	67325.9	75326.9	83297.8	95233.7	103127	103902	62644.7	61518.4	52783.1	73063	72290.7	79537.5	81435	69776.3
Leukotriene A-4 hydrolase OS=Homo sapiens OX=9606 GN=LTA4H PE=1 SV=2	5.77	69912.7	14807.2	P09960	35	54.83	0	LKHA4_HUMAN	112733	111570	108274	101576	100402	116361	105607	98166.7	114656	125535	131678	120653	102341	103062	106263	68706.3	67456.7	74309.7	84339	82823.7	91983.3	56239.7	51523	57334.7	49672.7	44267.7	44651	65525	64686	61376.3	72126.7	69760	71002.3	62796.3	70397.7	61165	29550.7	29072	34909.3	13653.7	17442.3
Adenine phosphoribosyltransferase OS=Homo sapiens OX=9606 GN=APRT PE=1 SV=2	5.67	19778.9	14752.7	P07741	11	46.67	0	APT_HUMAN	80921.7	81555.3	79540	63421.7	60553.7	68309.7	61922.3	62317.3	73802.3	73337.7	90490	75949.7	65934	69135	67758.7	64661	61376.7	74032	53713.3	54885	62068	92880.7	92517.7	77553.7	74636	171369	71611	58597.7	83893.7	71773.7	95129.7	91123.7	74313	72210.7	68535.3	46581.3	86040.3	53432.7	73042	28879	31424
Malate dehydrogenase_ cytoplasmic OS=Homo sapiens OX=9606 GN=MDH1 PE=1 SV=4	7.19	36654.3	14731.5	P40925	25	54.49	0	MDHC_HUMAN	180670	180771	164169	154113	153325	162427	156497	158213	168562	177189	195149	194134	182168	184021	197790	52863	50818.3	46255.7	33352.3	31245.7	28007.3	135642	136161	122414	117430	127602	121990	142366	149145	128966	157962	165590	157148	168116	168386	136280	92164.7	78617	106808	16496.7	18979.7
Keratin_ type II cytoskeletal 6A OS=Homo sapiens OX=9606 GN=KRT6A PE=1 SV=3	8.07	60330.2	14724.2	P02538	32	45.74	0	K2C6A_HUMAN	33569.9	35748.7	34063.8	10460	11198.2	13162	21980.7	20775.2	21754	33651.6	31652.4	32021.1	23684.3	20197	20209.2	82043.5	78113.7	87544	29190.6	30841.6	29818.4	20778.8	20349.4	20923.8	11445.7	9991.53	5500.42	28562.5	28258.5	29189.2	29675.4	23817.3	26700.6	71850.2	63922.4	50477.8	43137.4	38428.9	39228.7	59728.4	55444
60S ribosomal protein L5 OS=Homo sapiens OX=9606 GN=RPL5 PE=1 SV=3	10.19	34590.8	14669	P46777	16	36.7	0	RL5_HUMAN	31655.7	30140.7	33110.3	106973	127165	153689	115456	115276	141184	56604.7	68533.3	58887.3	36376.3	33307.3	35039.3	12741.3	12691	13452	19849.3	17867.3	22862.3	135918	123818	137913	112167	75014	177137	87253.3	100990	107140	54888.3	68992.7	68476	63092	66089	57064.7	30877.7	25973.7	39997	18343.3	17861.3
40S ribosomal protein S2 OS=Homo sapiens OX=9606 GN=RPS2 PE=1 SV=2	10.89	31609.6	14661.6	P15880	17	54.61	0	RS2_HUMAN	28622.7	22404.3	24929.3	56568	59039.3	60073.7	55497	52961.7	57476.7	36856.7	39892.3	40884.7	27359.3	26443.7	28113	12087.3	11685	11592.3	20932.3	20176.3	21519.3	21013.7	20250.3	20963.3	16853.7	16445.7	15630.3	18882.3	17485.3	16525	11857.7	12588.7	13714	9663.33	7858	6723	6001	4229.5	4458.67
Nucleolin OS=Homo sapiens OX=9606 GN=NCL PE=1 SV=3	4.4	76671.5	14576.9	P19338	32	46.48	0	NUCL_HUMAN	116418	123062	114010	151583	153596	160652	163702	157356	171687	140515	148405	139405	127596	130639	134362	110195	103123	112670	136763	141484	161821	143942	143354	126930	131157	130968	138345	182601	180812	158861	175661	184142	154859	156063	157507	175870	178926	180665	156287	180442	145564
Keratin_ type I cytoskeletal 16 OS=Homo sapiens OX=9606 GN=KRT16 PE=1 SV=4	4.79	51610.1	14536.3	P08779	33	64.9	0	K1C16_HUMAN	33572.9	33572.7	33214	13591.1	11006.3	18232.3	18273.3	19101.9	26642.4	24795	30920.9	24775.3	15181.6	14681.7	13744.7	86028	84001	92741	31178.2	31273.5	40254.8	27299.6	30683.3	27946.8	23401.1	20733.3	17126.7	21033.9	33110.4	33114.3	19154.4	26273.7	26636.4	70464.7	63891.3	68986.3	46020	42768	44928.5	65808.8	61845.8
Translationally-controlled tumor protein OS=Homo sapiens OX=9606 GN=TPT1 PE=1 SV=1	4.64	19709.5	14352	P13693	7	62.79	0	TCTP_HUMAN	23238.5	38214	37925.5	62730.7	59806	70390.3	60585.3	59104.3	65140	65360.7	78481.3	70816	41254	36215	26134.3	33934.5	33216.5	25908.7	39165	42806	31886	65068.6	62998.6	56574.4	42522.8	35456.1	36968.2	62198	52275.9	43179.9	71391.3	70790.5	70522.2	49237	32948.3	30820	27240.5	23823	18774.3	16710	16090
40S ribosomal protein S21 OS=Homo sapiens OX=9606 GN=RPS21 PE=1 SV=1	8.84	9225.45	14351.6	P63220	5	55.42	0	RS21_HUMAN	85326	103798	100160	68543.7	40859.3	77770.3	97807.5	87212	94454	78784.5	93275	54091.7	96476.3	96159.3	17606	85799	90156	106152	117922	90749.5	125506	37982.5	70687	60227	21718.5	4625	30756	50534.5	44897	40363.5	72882.5	36245.3	52076	51010.5	44153	40125.3	87770	38368.7	38167.3	103078	56405.5
40S ribosomal protein S24 OS=Homo sapiens OX=9606 GN=RPS24 PE=1 SV=1	11.47	15423.2	14344.9	P62847	6	39.1	0	RS24_HUMAN		6563.5	8549.5	15854.7	15017	19298.7	14619.3	13463.7	14937.3	10107.3	10822.3	10623.3	8063.5	6983.5	8815.5	5027	4168	6162	9743	6665	10376.5	5769.5	5696.5	4562.5	3572	2848	3289	4286		4823	3392	3487.5	3648	2696
Stress-induced-phosphoprotein 1 OS=Homo sapiens OX=9606 GN=STIP1 PE=1 SV=1	6.42	63266.7	14341.5	P31948	37	52.49	0	STIP1_HUMAN	86725.7	89892	90824.7	111260	100036	103360	104303	97596.7	109280	96436	95962	96479.3	89120.3	91958.7	88016	60505.7	58740.7	55822.7	61081.3	66557.7	62661	85128.7	80838	92659	93373.3	70359.3	77293.7	105435	114610	108429	119617	106919	113919	121397	121653	106331	93911	97004	101263	98576	85312.3
Carbonyl reductase [NADPH] 3 OS=Homo sapiens OX=9606 GN=CBR3 PE=1 SV=3	5.78	31249.5	14291.1	O75828	13	62.45	0	CBR3_HUMAN	11379	11463.5	12679.4	7749.58	7880.58	12929.1	11528	8213.31	8866.2	8171.43	9145.3	9238.34	11904	11642.4	8638.59		5040.84	5178.61	7919.61	9110.92	17479.7	16451.2	17866.5	12886.7	15056.1	16460.1	15752	12319.5	11984.3	8046.63	7797.46	7190.81	7722.4	4487.2	4156.53	8069.28	6529	8144	6221	7343	7149
Cytochrome c OS=Homo sapiens OX=9606 GN=CYCS PE=1 SV=2	10.15	11862.8	14231.3	P99999	8	61.9	0	CYC_HUMAN	48966	46988	47776	42237	43210.7	51488.3	35414.7	38351	47250.7	44191	59137.3	46305	61085	57165.7	67485.7	68441	65771.3	81871.3	56987.3	61216.3	74334	36815	38641.7	41857.7	38860	34003.7	33504	49606.3	52136	53995.3	52497.7	54191	58478.7	73890.3	72597.7	51994	84988.3	81841	89888.7	60746.3	59629.3
Proteasome subunit alpha type-1 OS=Homo sapiens OX=9606 GN=PSMA1 PE=1 SV=1	6.19	29840.8	14215.2	P25786	14	58.94	0	PSA1_HUMAN	74329.3	77576	79075.3	47975	50276	53719.3	43410.7	43469.3	50362.3	59532.7	61433.7	59824.3	66825.7	67536.3	75747.7	94563.3	92258.7	88751.7	97278	108193	103121	50144	51208.7	47342	45134.7	41292.7	43626	58249.7	60477.7	56279.3	73494.7	67822.3	64030.7	73966.3	80255.7	68013	89629.3	88338	98680	106313	96184
Elongation factor 1-alpha 2 OS=Homo sapiens OX=9606 GN=EEF1A2 PE=1 SV=1	9.49	50812.4	13922.8	Q05639	21	51.62	0	EF1A2_HUMAN	26784.8	26561.6	25770.2	31065.6	30998.9	36205.8	33026.5	31488.1	32052	29721	29836.4	33716.3	18466.8	20068.3	19516.6	16564.6	15231.9	16196.2	9254.91	10222.7	10318.5	23343.1	22541.7	22264	26536.4	23498	26235.5	23093.9	23155.4	23012.5	18907.7	21930	21774.6	21036.4	20315.7	18367.9	11802.5	12292	11614
Jupiter microtubule associated homolog 2 OS=Homo sapiens OX=9606 GN=JPT2 PE=1 SV=1	9.97	20120.4	13890.5	Q9H910	6	46.84	0	JUPI2_HUMAN	5403	5314.5	5587	6001	5214	6599.33	4384	4924	4386.33	5559.67	6304	5653.33	8916.67	9018.67	8603.67	7179	7867.33	6819.67	11506.3	11418.7	12971	10588.3	10171.7	9639	6979.33	8030	7360	12555.3	12501.7	11992.7	10339.3	15709	14415.7	16805	23709.3	11278.7	20457	23435.3	22737	21906.3	26431.3
Hypoxanthine-guanine phosphoribosyltransferase OS=Homo sapiens OX=9606 GN=HPRT1 PE=1 SV=2	6.27	24807.5	13844.4	P00492	9	47.71	0	HPRT_HUMAN	93391.3	110277	109836	71997.3	82999	80959	79091.7	84613.7	84041.7	106491	100213	98805.7	123206	123733	116738	117422	124447	126088	143550	149319	160692	58950.3	58621	63603	55577	48113.3	49422.7	66486	70324.3	72626	81551.3	77544.7	81060.3	95147	89107.7	42325	85200.7	70981	94317.7	90819.5	70418.7
40S ribosomal protein S8 OS=Homo sapiens OX=9606 GN=RPS8 PE=1 SV=2	10.96	24490.3	13838.7	P62241	9	43.27	0	RS8_HUMAN	28324.3	26209.7	25801.3	66534	69161.3	62697.3	62957.7	61764	57054.3	44019.3	41552	42281	30514.7	29226.7	28165.7	14844.7	14516.3	14391	30354.3	30001	31642.3	13275.3	12897.7	13304.7	11227.7	9736	10257	9748	10025.7	10804.7	4356	4751.33	5625.67	4858	5356		4179	5771	4388		5191
ADP-ribosylation factor 5 OS=Homo sapiens OX=9606 GN=ARF5 PE=1 SV=2	6.39	20643.8	13780.3	P84085	10	57.78	0	ARF5_HUMAN	6816.3	7295.69	6813.69	12565.1	12471	11532.6	15503.3	14510.9	13446.6	15346.6	14566.1	15136.7	8412.38	8179.89	7309.93							12113.2	11822.4	12565.5	8538.68	5959.11	8229.79	10573.2	10713.8	10442	9300.24	9834.41	10564.4	9328.87	8254.48	5227.89	2782.43	3161.8	3548.57	2649.12	2154.48
Poly(rC)-binding protein 1 OS=Homo sapiens OX=9606 GN=PCBP1 PE=1 SV=2	6.75	38011.1	13754.1	Q15365	12	47.19	0	PCBP1_HUMAN	41481	35078.3	37432	78685.8	80531.3	72684.5	74404.4	73063	71593.2	54101.5	55695.1	58219.5	34144	31375.3	32422.8	38829.8	37629.2	35075.1	42634.7	40993	37917.9	79119	79108.3	78159.3	61720.7	58190.9	59301.3	75795.8	81554.7	71684.1	64236.7	69789	71027.7	60088.3	55695	50903.3	46190	32334.8	61591.3	47736.3	50758.6
Calcyclin-binding protein OS=Homo sapiens OX=9606 GN=CACYBP PE=1 SV=2	8.63	26324	13701.5	Q9HB71	14	64.91	0	CYBP_HUMAN	21196.3	19057.3	19592.7	48894	50202.3	60115	46359.7	49471.7	56116.7	43550.7	53968	48200.3	23300	21665	24244.3	14207.7	13190.7	15473.3	16051.7	14350	16911	40406.3	40527.7	53180.3	42791	31966.3	32132	52509.3	52296	63246	62544.7	49373.7	64204.3	49404	40928.7	23898.3	34509	30343.7	32120.3	20873.7	19263.3
Tropomyosin alpha-4 chain OS=Homo sapiens OX=9606 GN=TPM4 PE=1 SV=3	4.47	28635.9	13657.6	P67936	13	36.29	0	TPM4_HUMAN	96771.8	106328	102172	75317.9	77862.6	77992.8	83862.2	84946.7	94369.3	97061.2	102333	96353.7	114132	117794	114869	112247	114871	120111	134296	136983	138695	62441.8	55591.5	58790.1	60867.9	59546.8	66315.8	79685.1	71166.3	81098.5	72648.3	97012.8	93049.4	103177	106439	81064	122739	122155	126399	133819	131120
Macrophage migration inhibitory factor OS=Homo sapiens OX=9606 GN=MIF PE=1 SV=4	7.98	12647.4	13636.5	P14174	3	28.7	0	MIF_HUMAN	14036	10935.5	14510	11785	16904.3	10882.3	5030	6635	4089.5	14467.5	7046.67	8341	10405	15410.5	8975.5	8677.5	14831	7044.33	24086	23129	13141		4930	6007		13321.5	15068.5	9202	8225	5955	7037	9610	9486.5	8334.5	6554	12215	7300	14181	15046		13724
Heterogeneous nuclear ribonucleoprotein A/B OS=Homo sapiens OX=9606 GN=HNRNPAB PE=1 SV=2	8.49	36339	13542.6	Q99729	11	33.43	0	ROAA_HUMAN	18918	21489.3	21380.3	40688.3	40314.7	47589	28295.7	27577	39289.3	25715.3	32853.3	27892.3	26782	25959.7	35629.3	28003	27709	36917	34242	31251.7	45567.7	75521.7	76765	75598.7	64466.3	58863.7	56951.7	88336.7	90063.3	74042.7	83672.3	108056	96920	103749	97753	83669	89988.7	94230.7	115149	153427	116967
Hsc70-interacting protein OS=Homo sapiens OX=9606 GN=ST13 PE=1 SV=2	5	41502.9	13529.2	P50502	14	41.73	0	F10A1_HUMAN	66999.3	59498	59302	91120.1	94218.3	105511	95793.8	103168	109542	103188	100760	108368	54139.7	50520.1	55665.7	59571	51288.8	53776.3	55922.2	61666.9	62799.7	69569.4	66852.4	76097.6	59822.3	50178.9	50815.9	93979.9	94202.3	100373	137649	85421.1	93268.4	73888.7	65261.7	81692.3	80114	73433.3	79206.3	62646.7	46332.9
Dynactin subunit 2 OS=Homo sapiens OX=9606 GN=DCTN2 PE=1 SV=4	4.93	44345.1	13521.1	Q13561	22	74.81	0	DCTN2_HUMAN	14748	15414.7	16884.3	33062.7	33868.7	31288.3	34956	34262.3	33418	20581.3	20450.7	20919.3	16010.3	15548	16252	15166.7	16017.7	17396	19185	21357	20227.7	34396.3	32082.7	28310.7	31829.7	30730	29549.7	35598	34392	32262.3	32540	32500.7	30467	27122.3	26122	19978.7	29589.3	29181.3	29591.3	33672	32966.3
40S ribosomal protein S20 OS=Homo sapiens OX=9606 GN=RPS20 PE=1 SV=1	10.71	13486.8	13471.4	P60866	3	25.21	0	RS20_HUMAN	33846.5	33464	33893	59996.5	65363	55549.5	53485	61169	51124	39826	34290	38162.5	39375	38822.5	34315.5	21087	21906	18055.5	33773	30663	26778.5	49205.5	49579.5	54884	27906	31510	35338	47492	53443	55618.5	40767	47380	53676	42042	38655.5	33320.5	27793	24893	26443	17366	16979.5
Histone H2B type 1-J OS=Homo sapiens OX=9606 GN=H2BC11 PE=1 SV=3	10.99	13904.2	13439.8	P06899	8	50.79	0	H2B1J_HUMAN	13900.8	6350.21	8537.97	12046.5	12981.7	9418.01	6960.58	6896.43	8900.5	6806.22	5753.02	7280.2	3816.5	1265.08	9060	5795.32	5100.35	8200	7537.85	7916.94	9089	11495.5	10573	13116	12937	6367.2	7281.69	11360.2	10841.3	11909.7	14581.9	12830.1	11149.8	13095.9	14838.3	20341.8	10229.4	12264.5	18361.3	9398.53	16520.9
Keratin_ type II cytoskeletal 6B OS=Homo sapiens OX=9606 GN=KRT6B PE=1 SV=5	8.07	60352.2	13423.8	P04259	32	45.74	0	K2C6B_HUMAN	35279.9	37278.1	36735.9	11517.8	9963.06	10022.6	21460.7	20801.9	20555.4	26578.4	25282.9	25526.3	26038.2	24298.9	24100.8	74123.3	68569.5	77740.5	24667.6	26531.2	27794.4	12261.1	13354.7	12314	4820.15	6734.77	6429.91	24700.5	25038.2	26127.7	16945.2	17325.7	19368.2	54984.2	47690.8	49007.6	33463.1	38158.2	36471.6	42552.5	49617.7
Prefoldin subunit 2 OS=Homo sapiens OX=9606 GN=PFDN2 PE=1 SV=1	6.23	16704.9	13414.4	Q9UHV9	12	70.13	0	PFD2_HUMAN	21561.7	20662.7	21889.3	27216.7	25771	30994	23158.7	22787.3	28160	24348.3	29296.7	26775.3	26867.3	27005.7	27101.7	19774.3	19372	21664.3	20906.3	21180.3	25491.7	24752.3	24789	26457.7	23244	22997.3	22942.3	30485.7	29668.3	28824.3	38647	31516.3	34061	39074.3	34745.3	33577	27283.7	27532.3	27909.3	12903.7	12944
Prefoldin subunit 5 OS=Homo sapiens OX=9606 GN=PFDN5 PE=1 SV=2	5.93	17385.2	13340.1	Q99471	8	65.58	0	PFD5_HUMAN	17428	16761	17046	11285	11177.7	14683	11171.3	8711.67	12942.7	18059.3	20056	18156.5	11021.7	13572	18401.7	16765.5	11491.7	16313.7	10973.5	9289.5	11510.3	13863	13078.3	16164	10191.7	16307.3	11976.3	22956	21646.3	18656	22042.7	24072.3	22901	24794	20194	22891.7	25302.5	16626	18228	12497	13064.5
Putative Ras-related protein Rab-1C OS=Homo sapiens OX=9606 GN=RAB1C PE=5 SV=2	5.08	22245.1	13324.1	Q92928	7	44.78	0	RAB1C_HUMAN		4284.26	5398.57	1584.7	1681.22	2699.86	4442.86	6648.22	7036.13	3094.72	4698.97	4800.26	6585.81	6378.93	8487.24	18594.5	19570.1	7594.92	3553	5716.52	3803.65	12881.2	13708.9	10377.7	14741.1	14538.2	14453.9	7120.61	7247.22	11497.9	7437.76	15655.8	9425.98	2438.49	2799.13	1494.22
Proteasome subunit beta type-2 OS=Homo sapiens OX=9606 GN=PSMB2 PE=1 SV=1	6.64	23007.4	13312	P49721	10	59.7	0	PSB2_HUMAN	67396.7	62488	67552	41853.3	44284	50721.7	40280	41659.3	48811.3	54367	64869.7	58850.3	48098.3	49695.7	54036.7	94584.3	85169.3	93009	92194.7	100816	112548	51914.7	53565.7	43881.3	38183	40591.3	39778.7	58475.7	58513.7	53361	65401	65252.3	59951.7	74088.7	73324.7	68094.7	75532.7	82439.7	82492.7	79391.7	75373
Putative heat shock protein HSP 90-beta 4 OS=Homo sapiens OX=9606 GN=HSP90AB4P PE=5 SV=1	4.45	58891.8	13268.4	Q58FF6	14	22.38	0	H90B4_HUMAN	19884.3	19026.9	19721.4	49329	52417.9	57581.7	41589.7	44893.4	45756.5	28845.5	38699	31542.7	16304.1	17844.4	17504.8	18617.2	17950	17828.6	19723.2	22222	21556.2	23906	24149.1	22860.4	24763.7	35604.1	26667.8	33797.7	32872.4	26232.8	26209.8	23976.5	22907.9	20799.7	21442.8	24634.1	14016.2	16396.8	13005.1	17819.2	16191.3
Heat shock protein HSP 90-alpha A2 OS=Homo sapiens OX=9606 GN=HSP90AA2P PE=1 SV=2	4.38	39478.9	13251.6	Q14568	15	45.19	0	HS902_HUMAN	10740.5	10752.3	10212.4	11106.2	12636.7	13828.2	42515.7	36809.7	31896.5	12296.9	12332	12506.4	81381	73651.6	66186.1	29386.4	27929	40043	5356.83	5446.18	6223.78	3867.45	4212.01	5353.54	6226.02	5639.74	4595.06	9039.47	8414.56	8807.62	6142.41	3930.43	5414.01	12875.8	10775.1	8950.58	14680.3	12663.3	12684.7	13693.6	12728.2
D-dopachrome decarboxylase OS=Homo sapiens OX=9606 GN=DDT PE=1 SV=3	7.19	12825.8	13225.9	P30046	8	50.85	0	DOPD_HUMAN	90663	90834	83130	70297	67366.7	57095.7	70925	69420.7	54933.7	78348	62983.7	76721.7	92319.7	87497.7	59828.3	111206	93691	82473.3	106287	119158	85023	48709.3	48969	51614.3	45537	36279	37535.7	49806.7	48134.3	41331.3	56663.3	60371.3	71093	68676	39486	42315	24960	28498.7	51892		15093
Aspartate aminotransferase_ mitochondrial OS=Homo sapiens OX=9606 GN=GOT2 PE=1 SV=3	9.36	47916.9	13201.4	P00505	20	44.42	0	AATM_HUMAN	114598	119402	112634	72231	64516	76470.7	63361	69732.3	74645	101621	103638	105085	95132.3	93233.3	100374	130975	128577	135591	140722	146302	160105	116743	114781	104858	95369.3	94091.3	95390.7	119806	112092	114080	133822	130565	129951	144516	144334	136759	177054	158813	161479	170869	161347
Non-POU domain-containing octamer-binding protein OS=Homo sapiens OX=9606 GN=NONO PE=1 SV=4	9.51	54345.8	13079.7	Q15233	20	45.01	0	NONO_HUMAN	21767.1	19940.8	20127.7	53925	56457	53093.7	36198.3	38524	33090	23053.7	20894.3	21637	16439.4	15301.3	12724.7	12484.3	13745.3	12969.3	18911	18741.1	17331.3	120439	114091	90245.7	89801.7	88159.7	84119.7	73766.7	71450	58409	73948.8	70167.3	56850.1	56787.8	59168.9	56651.4	60510.3	64232	54118.3	47669	56131.3
Acidic leucine-rich nuclear phosphoprotein 32 family member A OS=Homo sapiens OX=9606 GN=ANP32A PE=1 SV=1	3.78	28699.5	13039.4	P39687	7	21.69	0	AN32A_HUMAN	160799	193056	175474	155419	147681	137181	158603	154994	139382	158259	156084	165076	167430	188966	180422	149102	147770	153880	198658	193121	209984	97196.1	101830	94921.4	89817.7	85272.6	85602.8	119043	123287	99326	107439	126025	122846	116954	105495	75624.5	99051	103516	59494.7	93861.3	82681.5
Multifunctional protein ADE2 OS=Homo sapiens OX=9606 GN=PAICS PE=1 SV=3	6.99	47820.6	12974.6	P22234	19	36.71	0	PUR6_HUMAN	97604.7	90378.3	93408.3	75528.7	74142.3	75490	79676.7	76199	76729.3	91774	109306	94811	107287	108953	112455	111510	105929	112736	115730	119163	128641	56582.7	52369.7	51676.3	46305	43423.7	43327.3	62750.7	57383	63265	78501.3	69976.3	71479.7	76810.3	83632.3	74916.7	89032.7	85340.7	81350	91329.7	78093.7
40S ribosomal protein S15a OS=Homo sapiens OX=9606 GN=RPS15A PE=1 SV=2	10.88	14953.6	12948.7	P62244	8	57.69	0	RS15A_HUMAN	8014.67	9882.33	9973.67	23960.3	23943.3	23495.3	20310.3	23304	19458	16536	16380.7	17556.7	10547.3	11112.3	10217.7	7742.67	8392.33	8394	12674	12683.3	12069	9346	8739.5	8736.33	3925	3760.67	4165	6520.33	6742	5017.5	4286.5	5321	5117	5716.33	4665.5						5648
Synapse-associated protein 1 OS=Homo sapiens OX=9606 GN=SYAP1 PE=1 SV=1	4.25	39990.5	12905.1	Q96A49	21	49.15	0	SYAP1_HUMAN	19226.3	17728.3	19260.7	27782.7	25039	29330	31374.7	31853.7	37781	26650.3	32336	27484.7	19835.3	20155.7	22292.3	13468	13645	14387.3	14985.7	15504.7	15230.7	58218.3	57406	53208.3	54491	52330.7	52742	54437.3	51720.3	48381	48231	68476.7	62122.7	49049.7	55021	26882.3	38603.3	39538.7	39671.7	25983	31819.3
Elongation factor 1-delta OS=Homo sapiens OX=9606 GN=EEF1D PE=1 SV=5	4.71	31235.9	12886.4	P29692	14	67.26	0	EF1D_HUMAN	30740	30963.3	31896.3	99349.7	99301.7	102749	102276	101656	102126	47659.3	49952.7	51310	31022.3	28178.7	29220.3	28520	27348.3	31453.7	40359.7	38417.7	38325	103348	99694.3	101728	90355	83403	90986.3	103946	104727	91535.3	74708.3	82833	76076	59390.7	61206	50833.3	60285	62923.7	68273.7	42012	59699.3
Serine hydroxymethyltransferase_ mitochondrial OS=Homo sapiens OX=9606 GN=SHMT2 PE=1 SV=3	8.59	56449.3	12841.5	P34897	27	53.37	0	GLYM_HUMAN	85515.3	95893	100062	57469.3	56431.3	60959.7	54479.3	53720	58161	74467.3	81558	72927.3	79589.7	79098.7	90327.3	90069.7	88750	89852.7	52546.7	62681	62431.7	117246	109889	113453	119478	118521	105998	99204.3	97108.7	98367.7	136261	138497	123138	135828	134745	133701	155447	140536	148164	39991.7	40451.7
40S ribosomal protein S3a OS=Homo sapiens OX=9606 GN=RPS3A PE=1 SV=2	10.43	30173.1	12800.6	P61247	16	44.7	0	RS3A_HUMAN	22524.3	22449	22152.7	53209.7	51215.3	45508.3	45994.7	46839.3	36862.7	30123.3	27462	28921.7	24201.7	20699.7	19047.3	10939	10076.7	6384.67	22111	22673	21549.7	4308	5369	5901	4393.67	2780.33	2697.67	8452.33	7950	8694	7183	5595	7446	8295	5884	6057.67	3870			9143	5304
Cystatin-B OS=Homo sapiens OX=9606 GN=CSTB PE=1 SV=2	7.52	11196.6	12749.6	P04080	5	59.18	0	CYTB_HUMAN	27530.3	25447	27771	38542	38229.3	41663.7	33818.7	35307	37277	44192.3	44912.7	46453.7	34916	35356	35013	18127	18782	16993	20356.7	21338.7	20287.7	31431.3	29633	28836.7	30405.7	26434.3	29022.3	32294.7	28829	32096.7	50214.3	38866.3	40265.7	41494	42478.3	42690.7	19322	25274	23117.7	11838.5	14656
Small acidic protein OS=Homo sapiens OX=9606 GN=SMAP PE=1 SV=1	4.37	20389.6	12741.2	O00193	4	36.07	0	SMAP_HUMAN	44458	42095.7	44394.7	28451	28582	25190	30630.3	31434.3	23754	37069.7	32959.3	41246.3	53961.3	52295.7	54453.3	66905	58852.3	64418.7	74640.3	76107	84892	16843	14035.7	16000.7	10196	9663.67	10428.7	21951	29341	20406.7	25432.3	28372.3	26126	32482.3	33493	25929.7	30048	21572.7	24554.7	7151	18647.5
S-phase kinase-associated protein 1 OS=Homo sapiens OX=9606 GN=SKP1 PE=1 SV=2	4.2	18829.1	12651	P63208	8	68.1	0	SKP1_HUMAN	47188.7	44958	50195.3	26759.3	29781	35537.7	48344.5	32811	39205.3	38840.3	53165.3	59713.5	50281.3	52284.3	65344	55292.7	46290	59692.7	52418.7	45770.7	62916.3	39178.3	40836.7	36948.7	35342	34527	33706.3	42865	42168	34494	57004.7	65263.7	57679	58675.7	55121.7	53000.7	43991	47639	45580	22315	34483
Prostaglandin E synthase 3 OS=Homo sapiens OX=9606 GN=PTGES3 PE=1 SV=1	4.12	18982.6	12619.4	Q15185	5	31.25	0	TEBP_HUMAN	29090.7	28299.3	31198	52316.7	50984.3	54814.3	46071.3	45680.3	48462.3	36207.7	36454.3	32820	34912.7	35459.3	37309.3	29589.3	25972.3	26563.3	31045.3	33660.7	47693	22279	22076.3	23369.3	27431.7	31364.7	29069.3	25591.7	24774.7	25818	22392	18676.7	20100.7	22900.7	20925	22561.3	35133	33904.5	33412	28844	27147.5
Protein phosphatase inhibitor 2 OS=Homo sapiens OX=9606 GN=PPP1R2 PE=1 SV=2	4.44	23072.3	12613	P41236	7	50.24	0	IPP2_HUMAN	10713.3	9989	11736.7	9670.67	8365.67	10189.7	10180	7712	10380.7	9168.67	10314.3	9601.67	11796	10205.7	10439	10766	10720.7	10023.3	12474.9	12956	14310.8	5475	5669	4920	4454.7	3834.19	4767.12	4566.99	5916.33	4454.67	5320.33	6695	5534.67	5154.67	3755.67	459.032	4884.45	5059.67	3946.9	8629.17	5817.46
Neudesin OS=Homo sapiens OX=9606 GN=NENF PE=1 SV=1	5.37	18856.4	12580.4	Q9UMX5	8	52.91	0	NENF_HUMAN	28601.3	25361.7	27509.7	17261.3	18787.3	18437.7	18826.7	18903.3	17808	15677	16444.7	23249.3	32014.7	34750.3	33208	30907.3	31391.3	23159.7	38150	40234.7	27526	29109.7	27642	24587.7	23660	26063.7	26968.7	37688.7	35676	31095.3	41718.7	44642	37151.7	44832.3	46364.3	31928.3	30973	44609.3	55608	37634.7	47405.3
Y-box-binding protein 3 OS=Homo sapiens OX=9606 GN=YBX3 PE=1 SV=4	10.16	40090	12513.8	P16989	19	65.86	0	YBOX3_HUMAN	31096.6	29558.9	33185.9	16150	16562.6	18428.5	16857	16188.9	23174.6	22738.3	43534.5	21326.8	46680.3	49650.2	53866.3	32437.9	30835.9	37658.3	32407	32824.1	37743.1	15876.3	17804.8	18378.1	14034.1	15304.9	14613.8	20654	20758.9	16680.5	25215.5	28738.4	26484	49625.8	30835.8	28175.6	57050.8	38350.2	40305.2	73921.5	82546.9
Phosphoserine aminotransferase OS=Homo sapiens OX=9606 GN=PSAT1 PE=1 SV=2	7.6	40821.9	12467.9	Q9Y617	17	41.08	0	SERC_HUMAN	79535.7	84561	83990	60995.7	66711.3	64503.7	63659.3	69787	61328	81692	77593.7	84164.3	65698.3	67481.7	63638.3	55653	47731.3	45370.3	22727	21946	20532.7	50031.7	49442	50331.7	40747	36968.7	39878.3	54354.7	54428.3	52055	53123	54768	62374.3	63266.7	59465.7	61673.7	60348	62876.3	61109.7	15204.3	14508
Polypyrimidine tract-binding protein 1 OS=Homo sapiens OX=9606 GN=PTBP1 PE=1 SV=1	9.69	57392.5	12460.3	P26599	18	46.89	0	PTBP1_HUMAN	9202	9326	15813.7	60203	60178.3	59575.7	57363.7	55496.3	54697	31441.7	36249.3	33071.7	18713.7	19745.3	21109.7	14413	19916	21058	17077.7	20722	24045.3	112546	100543	104622	86376.7	88313	85324.7	71443.3	81227.3	60100.7	49967	72969	61122.3	21148.3	17930	32673	22395	9466	14209.3	16114.7	15030.3
Poly(rC)-binding protein 2 OS=Homo sapiens OX=9606 GN=PCBP2 PE=1 SV=1	6.38	38979.4	12401.6	Q15366	13	54.52	0	PCBP2_HUMAN	25898.2	25083.8	26464.6	69528.5	66601.1	65260.8	55055	56570.7	54094.5	31599.8	31511.5	36781.8	21563.7	19260.6	19858.5	20011.2	18507.8	17715.5	17832.8	21291.7	20495.8	81567	82158.9	72351.7	62916.4	61553.1	58775.6	70146.9	69589.3	60382.5	49846.7	52792	46376.3	42867.9	37064.5	36550.3	20963	31244.7	39657.3	14921.3	18531.3
Proteasome subunit beta type-4 OS=Homo sapiens OX=9606 GN=PSMB4 PE=1 SV=4	5.62	29261.4	12393.1	P28070	11	60.23	0	PSB4_HUMAN	90659.7	87952.3	86809	63981.7	66598	64446	63304.3	69720.3	63548	83470	81474	82775.3	87134.3	89428.3	91620	110087	100671	107350	108289	108345	115030	55543.3	53237	55121	54024.3	46817.7	48013.3	63261.3	60764	61520	83050.3	67176	69656.3	86018.7	89518	86097.7	94727.7	90794	98038.7	103869	100781
Histone-binding protein RBBP7 OS=Homo sapiens OX=9606 GN=RBBP7 PE=1 SV=1	4.72	48162.3	12314.4	Q16576	15	47.76	0	RBBP7_HUMAN	53848.5	52689.9	52267.9	86154.3	87960.3	97643.3	78099.8	79469.6	87704.1	86240.5	93221.5	89602.2	48829.1	50662.5	52106.2	27893	23832.1	27402.4	28764.5	28992.7	28759.6	82784.9	74187.4	75195	71922.1	79484.9	77559.4	83288.2	90576.6	83384.5	100216	91390.6	87715.8	88758.5	81551.4	74223.3	57018.4	63172.8	71577.2	19119.5	26451.9
Proteasome activator complex subunit 3 OS=Homo sapiens OX=9606 GN=PSME3 PE=1 SV=1	5.6	29620.2	12293.4	P61289	16	66.93	0	PSME3_HUMAN	64222.7	63574	63778	43451.7	43046	49211.3	44945.3	46922.3	52247.7	64028.3	66595.3	67084.3	80304.3	75061	72656	75866.7	84256	90830.3	90463.3	94175.7	102105	49667	48308.7	43627	33273.3	31527	34685.3	46607	46645.3	47855.7	42424	72191	56154.7	62214.7	60695	51776.3	64321.7	61463.7	71635	55976.3	58407.7
F-actin-capping protein subunit alpha-1 OS=Homo sapiens OX=9606 GN=CAPZA1 PE=1 SV=3	5.34	33093.9	12287.7	P52907	13	63.64	0	CAZA1_HUMAN	39618.7	37812.5	40248.7	44946.7	43626.4	50972.6	40014.3	43393.5	50705.3	49629.6	60012.8	50983.9	44777	46736	57395	28135.7	29212.3	28699.6	17869.4	18334.1	18852	38650.7	40382.3	32637.5	29905.3	32568	33890	41042.6	42572.5	34422.5	45325	50790.3	40510.3	42506.5	48815.1	49843.5	41924	47524.4	48864.5	12560.8	15911
Ezrin OS=Homo sapiens OX=9606 GN=EZR PE=1 SV=4	5.9	69527	12287	P15311	42	62.63	0	EZRI_HUMAN	16042.3	14495.7	15801.9	43996	47189.7	49443.3	51366	48089	49445.7	51499.7	54646	53749.3	17553.7	16557.7	18020.7	7350.81	7471.33	9054.33	7816.67	7644.33	9585.33	37433	37573.7	41813.3	34129.3	35968.7	33144	44388	43572	41189	42140.2	41175.7	44775.2	21556.7	18080.3	16230.3	16966	14649.4	16802.8	17762.7	19035
Reticulocalbin-1 OS=Homo sapiens OX=9606 GN=RCN1 PE=1 SV=1	4.67	38890	12275.6	Q15293	19	70.09	0	RCN1_HUMAN	61787.7	58009.3	59502.7	49055.3	45286.7	49573	46552	46053.3	54146	60421.7	65596	59327.7	70758.7	70753	89455.7	82735	77201.7	88255.3	90105.3	105748	114387	56186.7	59782.7	58491.7	53688.7	55236	56837	67374	67255	64504	88741.7	81378	72141	85046	99574.3	84652	102476	100764	109909	126051	132345
Histidine triad nucleotide-binding protein 1 OS=Homo sapiens OX=9606 GN=HINT1 PE=1 SV=2	6.52	13916	12271.5	P49773	5	60.32	0	HINT1_HUMAN	25212	21525.7	31527.5	23514.7	26119	25460.3	28162.5	23162.3	24045.7	29816.3	24528	32741	47189.5	35911	31052	30390	28591	24487	24204.5	22681	38672	48604.5	37905	36448.7	42250.3	40075	42516.7	53412	56741	57484.5	91866	79876.5	56275	50349	77281		68803.5	62422.5	65814	41481	33697
Proteasome subunit alpha type-2 OS=Homo sapiens OX=9606 GN=PSMA2 PE=1 SV=2	7.32	26012.7	12240.9	P25787	12	54.7	0	PSA2_HUMAN	48002	45396.3	48570	26203.7	35572.7	40613.3	26343	24561.3	29711.7	46298	45690	34483.7	45427.3	51828	46476.3	57964.7	48834	51547	57939	62650.7	62843	27136.3	29038	32969.3	29479	33226.7	34439	37919.7	36605	38875	44299	41991	45590	56444	41967	32445.7	73156.3	50254.7	49065.3	88171.7	87153
ATP synthase subunit delta_ mitochondrial OS=Homo sapiens OX=9606 GN=ATP5F1D PE=1 SV=2	5.2	17490	12204.5	P30049	2	11.9	0	ATPD_HUMAN	20754	18459	19873	5632	5353	8001	5980	6115	8078	6059	8964.5	6508	21110	19128	15548.5	59106	51259	66322	82746	92573	101825		5224	15408.5	15116		3774			17936.5		6757	23815	34993	30902.5		98956	103096	82895	147235	131581
Protein phosphatase inhibitor 2 family member B OS=Homo sapiens OX=9606 GN=PPP1R2B PE=1 SV=2	4.58	23163.5	12070.9	Q6NXS1	5	46.34	0	IPP2B_HUMAN				7777.55	5318.49	28606.6	8008.45	5281.74	38072.9	6272.88	22557	6670	5407.32	5422.79	19319.8	7094.76	5835.69	13538.6	7726.14	7348.4	14696.8	32334.8	28380.3	47183.1	81868	26461.6	3234.82	57069	50620.8	58909.1	46394.2	30087.3	38085.9	41934.2	32130.8	33287	42911.8	37831.5	30883.4	44368.7	36504.3
POTE ankyrin domain family member F OS=Homo sapiens OX=9606 GN=POTEF PE=1 SV=2	5.8	123099	12064.9	A5A3E0	24	23.26	0	POTEF_HUMAN	11198.9	11366	10560.5																22648.9	24496	22212.4				2668.61	1948.81	3980.75
Glutathione S-transferase omega-1 OS=Homo sapiens OX=9606 GN=GSTO1 PE=1 SV=2	6.25	27851	12038.3	P78417	14	42.74	0	GSTO1_HUMAN	114456	117109	111203	114593	116092	118305	118576	128140	128196	134376	138830	141291	117528	116952	118390	93598.3	83466.7	77919.7	76950.3	80263.7	73534.7	87824.3	87411.7	86557	81240	73512.3	72588.7	95618	104554	89004	124834	99246	103248	110764	107531	91795.7	105460	109407	116045	62281.3	78751.3
Putative heat shock protein HSP 90-beta 2 OS=Homo sapiens OX=9606 GN=HSP90AB2P PE=1 SV=2	4.59	44520.1	12016.9	Q58FF8	12	26.77	0	H90B2_HUMAN	21595.9	20142.4	19832.4	7677.08	7807.07	9142.43	10426.7	10848.8	11631.6	11678	12943.7	11402.1	11659.4	11291.7	11793.8	10450.2	9614.42	10644.3	15162	15906.4	17832.6	5750.33	4011.74	4490.93	4042.76	3440.52	2753.19	23616.4	25007.7	23677.1	16850.2	17970.9	15556.1	19347.6	16579.4	24300.5	28892.1	37047.1	23489.6	18191.4	17443.2
SUMO-activating enzyme subunit 1 OS=Homo sapiens OX=9606 GN=SAE1 PE=1 SV=1	5	38906.1	11967.8	Q9UBE0	19	64.74	0	SAE1_HUMAN	27258.3	22609	26762	49577	51792.7	60531.7	51878	56964.3	56336.3	55575	63683	60020.3	30532	27661	30431.3	15221	14046	15070	14738.7	15246.7	17238	36652.7	34579	40153	29596.7	23381.7	23605.3	38400	37033.7	37547.3	40918.3	40688.3	45533	26352.3	23627.7	18188.7	20747.3	17445.3	15667	13120	11588.3
Thioredoxin OS=Homo sapiens OX=9606 GN=TXN PE=1 SV=3	4.62	12022.7	11963.7	P10599	5	42.86	0	THIO_HUMAN	168616	170004	151374	124758	119102	94523.3	131888	129977	93917.7	142009	111030	144333	170801	177862	107755	150001	143253	113191	117116	174030	126263	61791.3	65857	64504.7	61430	55639	55744.7	80496.7	80387	71457	99010	101953	90202	103334	93573	107016	73573.7	80093	92165.7	25908.7	57379
Putative heat shock 70 kDa protein 7 OS=Homo sapiens OX=9606 GN=HSPA7 PE=5 SV=2	7.87	40472.6	11945.5	P48741	8	23.71	0	HSP77_HUMAN	17160.5	16962.5	16128.8	11912.5	11875.8	13156.4	13396.8	11301.3	15360.3	13875.3	16004.9	13398.6	17226.8	18293.8	20769	9934.24	13071.2	14231.4	11925.4	12382.7	18422				8048.58	8081.56	8051.47	31549.3	50335.8	24662.9	24094.1	31665.6	17044.7	18629.3	16469	18149.3	23581	36029.7	27445.3	22009.7	25266.6
2'-deoxynucleoside 5'-phosphate N-hydrolase 1 OS=Homo sapiens OX=9606 GN=DNPH1 PE=1 SV=1	4.78	19222.5	11926.5	O43598	8	63.79	0	DNPH1_HUMAN	32297.3	43761	48398.7	33721.7	32752.3	28367.7	34450	35817.7	30681	47783	40128.7	46769.3	56391	55695.7	50795	51067.7	54540	46186.7	49629	54357	64561.5	23340	23041.7	21753.7	28709.7	33690.7	32809.7	22542.3	20630.7	19099.7	22814.7	33061.7	31382	33401	19590.3	17218.7	17575	14184.7	18297.3	17864	14116.5
Bifunctional purine biosynthesis protein PURH OS=Homo sapiens OX=9606 GN=ATIC PE=1 SV=3	6.3	65129.2	11861.5	P31939	30	57.77	0	PUR9_HUMAN	5635.67	5101	4393.5	52990	54806.3	58085.3	45563.3	49906.7	51440.7	23524	24500.7	24066.3	7567	8188	9850	10510	73027.5	18896.3			3677.33	51064	53197.7	46279.3	54397.3	44493	46623	42497.7	44433	45728.7	34314.3	32707	28851.7	18666	20104	18203.3	19490.3	18229	19026	10550.7	11473.7
Adenylyl cyclase-associated protein 1 OS=Homo sapiens OX=9606 GN=CAP1 PE=1 SV=5	8.07	52357.8	11836.9	Q01518	22	54.74	0	CAP1_HUMAN	15473.7	15703.3	16147.3	61523.3	61742.7	68127	63684	66317.7	68174.3	66324	76146.3	74457.7	17548.7	15761.3	17639.7	8007.67	8484.33	8838.33	10731.3	10426.3	9873	65595.3	62454.3	63162.7	57677	60994.3	67381.7	66152.3	69854.7	47934.7	77768.3	80849.3	79360.3	35922	27921.3	24006.7	14149.7	11310	12452.3	8821	8385.33
Putative protein FAM10A4 OS=Homo sapiens OX=9606 GN=ST13P4 PE=5 SV=1	4.8	27577.9	11787	Q8IZP2	10	54.17	0	ST134_HUMAN				18615.5	20387.6	21687.4	21351.9	22657.4	24024.3	12232.1	12662.9	12932.7	10640.9	10150.6	11523.6	4905.14	4318.66	4831	5550.58	7181.29	7463.65	8667.58	8631.27	8936.58	15032.7	13139.5	12876.4	7900.73	7402.64	7202.53	10057.5	5734.2	5572.33							5695.31	5611.73
ATP synthase subunit alpha_ mitochondrial OS=Homo sapiens OX=9606 GN=ATP5F1A PE=1 SV=1	9.55	59864.8	11772.3	P25705	29	58.95	0	ATPA_HUMAN	91115.7	110407	101414	34129.3	33434	35010.3	36658.3	35897.7	36094.7	41032	46249.7	40892.3	107891	103939	109066	109089	98351.7	106158	76711.3	81760.3	85426.7	89520.3	92935.7	81677.7	68927	81788	82788.7	92092.3	92759.3	85315.3	164110	123699	131603	149033	144183	150252	158392	143562	144898	47647.3	47637.7
Keratin_ type I cytoskeletal 14 OS=Homo sapiens OX=9606 GN=KRT14 PE=1 SV=4	4.9	51903.7	11758.2	P02533	29	57.2	0	K1C14_HUMAN	49070.4	50254.5	48485.6	14498.2	13839.1	16022	20858.7	22437.3	23428.9	25705.3	27674.6	26220	13130.2	13900.2	15046.2	119427	109420	123834	32866.6	29847.9	32891.4	31505.4	32571.4	29080.6	13104.8	12235.3	12680.3	45740.3	49592.8	44599.8	40041.6	37834.7	34463.7	77403.8	85941.2	81878.6	58516.8	55452.7	62237.9	61612.5	70527.9
Acidic leucine-rich nuclear phosphoprotein 32 family member B OS=Homo sapiens OX=9606 GN=ANP32B PE=1 SV=1	3.73	28958.8	11742.6	Q92688	5	19.92	0	AN32B_HUMAN	59182.2	59873.6	55534.5	76877.9	81868	81781.5	84056	84905.8	78777.2	80899.1	79729.9	93622.6	56717.1	56786.6	54498.5	56831.6	51934.6	53260.3	52535.9	49884.3	53108	61677.6	58039.1	60982.6	51481	43810.8	44574.9	70692.1	72121.6	56699.7	57961.4	57999.9	65194.5	54817.6	36204	39181.7	22180	19065.3	27537.4		3073
Myosin-9 OS=Homo sapiens OX=9606 GN=MYH9 PE=1 SV=4	5.34	227787	11719.7	P35579	102	49.8	0	MYH9_HUMAN	15430.7	14257	14800.7	73195.7	79037.7	74575.3	73079	88594	88786	71937.3	74677	66520	19382.3	22359	25345	14357	13559	20181	15969	17279	23401.7	43803.3	44029.7	41566.2	39978.7	39993	40103	24112	23937	20299	20657.7	21567.3	17540.7	21879	25830	25070.3	21054	24837.7	26357.7	15793.3	16460.7
RNA-binding protein 8A OS=Homo sapiens OX=9606 GN=RBM8A PE=1 SV=1	5.38	19946.1	11692.4	Q9Y5S9	8	45.98	0	RBM8A_HUMAN	39374	44262.3	38515.7	36427	45505.7	43628.7	40349.7	49560	46192.3	38971.7	47190	39932.3	53214.3	52705.7	56534	43448.7	41712.3	45735.3	50460.3	52789.7	52457.7	36520.7	36557.3	42966.7	48410	36703.7	34151.7	49408	48053	50425	67843	52701	59243.7	71195.3	78282.7	67602.3	83181.7	79600.3	81932	75974	76606.7
Keratin_ type II cytoskeletal 2 epidermal OS=Homo sapiens OX=9606 GN=KRT2 PE=1 SV=2	8.07	65718.1	11650.7	P35908	40	70.74	0	K22E_HUMAN	50543.6	48677.5	47095.3	36397.3	38242.7	42304.1	27832.9	28095.2	32479.3	39392.5	44738.2	40339.5	44429	45868	53263.3	109679	111333	121654	48612.2	50977.2	59289.6	31917.4	37068.1	39278.1	18413	16135.9	16234.3	84644.6	86398.2	79576.3	67615.2	38921.7	41768.8	54142.2	57350.1	77080.2	92744.2	95344.9	91226.9	132864	124193
Hepatoma-derived growth factor OS=Homo sapiens OX=9606 GN=HDGF PE=1 SV=1	4.5	26902.4	11639.8	P51858	19	68.33	0	HDGF_HUMAN	56495.3	55793.3	57668.3	54980.3	53362.7	62189.3	55332.3	53114.3	60512	61969	72930	69616	65393.7	62977.3	71162.7	72682	60613.7	72982.3	76213.7	81350.7	91136	42474.3	41725.7	34936.4	34437.1	35545.9	33200.9	57825.7	58092.7	54919.7	66003.3	63703.3	56612.7	58714	62935.7	53381.7	51885	49718.7	52373	53407.7	55100.7
Putative small nuclear ribonucleoprotein G-like protein 15 OS=Homo sapiens OX=9606 GN=SNRPGP15 PE=5 SV=2	9.54	8601.11	11507.1	A8MWD9	3	35.53	0	RUXGL_HUMAN	33488.5	36264.5	37872	17478.5	20262	28928	22751.5	22062	31041	28426	43269	32536	42998.5	38626.5	57922	42068.5	37655.5	55954	28964.5	49144	72005	33035	32923	35089	21360	16030	8793.5	25249	19428	13615	22911	42769	62613	69410	26268	24008	7860	13199	6805		1473
Threonine--tRNA ligase 1_ cytoplasmic OS=Homo sapiens OX=9606 GN=TARS1 PE=1 SV=3	6.25	84347.7	11503.9	P26639	30	41.77	0	SYTC_HUMAN	46162.7	41317	45460.3	62932	65472.7	68953	70540.7	71342.3	74158.7	68462.3	73157	70616.3	44623.7	38359.3	34356.3	56639.7	50399.3	53338.7	55811.3	48722	48741.7	68851.7	69280.7	73576	64510	64044.3	61652.3	74464.7	72435.3	70233.3	45236.7	44822	47874	33081.7	31697.7	29008.7	25478	25683.3	27109.7	19578.7	18082.3
ATP-dependent RNA helicase DDX39A OS=Homo sapiens OX=9606 GN=DDX39A PE=1 SV=2	5.34	49642.9	11503.9	O00148	21	45.67	0	DX39A_HUMAN				44313.7	44833.2	45491	29204.5	30083.7	30073.3	24041.6	23280.4	23667.1	18639.3	16692	17375.5							64263.8	67494.3	73478.3	69083.3	59036.8	61117.4	63053.8	70547.1	78012.2	55470.3	60067.7	60519.6	73380.3	72060.9	61828.6	21235	21010.6	23116.8
Low molecular weight phosphotyrosine protein phosphatase OS=Homo sapiens OX=9606 GN=ACP1 PE=1 SV=3	6.37	18498.7	11488.4	P24666	6	42.41	0	PPAC_HUMAN	21521.7	19620.3	19952.7	65201.7	67569.7	57003.7	60317.7	61206.7	51158	35361.7	32592.7	37786.7	17048.7	17002.7	12851.7	13601.3	12210.7	12003	15497.7	14866.7	12632.7	39317.7	38896	39991	34918.7	32375.3	32919	35635.3	38332	37407.7	32459.7	28436.7	27604.3	25157	29186.3	17895	22094.7	24665	23649.7	17002.7	19044.3
40S ribosomal protein S18 OS=Homo sapiens OX=9606 GN=RPS18 PE=1 SV=3	11.59	17718.7	11487.7	P62269	10	55.26	0	RS18_HUMAN	17205.7	15752.7	16316.7	52673.7	55085.7	56958.3	41546.7	39943.3	42667.7	24182.3	26018	26042.7	15077.3	13694	21966	5826.67	6084	8409	16168.3	15604.7	14051	9833	10912.7	11549.7	8879.33	8059	7741	11604	11973.7	11398.3	4726.67	5595	8676	7288.33	5684	13715	2327	3943	4182.5	4004	4669.5
Phosphoglycerate mutase 2 OS=Homo sapiens OX=9606 GN=PGAM2 PE=1 SV=3	9.34	28937.3	11455.6	P15259	6	29.25	0	PGAM2_HUMAN																						4140.74	4569.77	3197.22	3773.92	2636.54	2593.77	4834.95	9801.04	10611.5	1679.23	3867.6	2166.58
Serine/arginine-rich splicing factor 3 OS=Homo sapiens OX=9606 GN=SRSF3 PE=1 SV=1	12.13	19557.7	11444	P84103	8	42.07	0	SRSF3_HUMAN	14787	11368.2	14627.2	13213.5	17334.6	23454.3	13815.3	16321.2	17356.2	15005	15681.6	14884	12799.7	13382.1	14482.9	15594.7	15376.3	15166.3	24540.3	25528.3	26530.4	24784.5	24040.7	29722.8	27834.9	20654.5	26909.4	46544.9	48724.1	39659.3	31755.8	48912	40967.8	42502.7	41309.8	40007.6	45347	41324.3	62938.5	85590.3	78221.7
Protein mago nashi homolog OS=Homo sapiens OX=9606 GN=MAGOH PE=1 SV=1	5.71	17220.7	11436.9	P61326	11	69.86	0	MGN_HUMAN	13117	8306.5	12967.3	22118.7	28548.7	28582.7	24805	27716.3	29222	20112.3	28131.3	22393	11587	10959.7	15001.3	8075.5	8044	7910.33	8268.5	8606	7993.33	33876	34313	35943	25631.7	25248	25245.7	36862.3	37214.3	31879.3	39090	38764.3	36606.3	31377	31961	27603.3	34504	23369.7	25333.3	20522	21606.5
Ras-related protein Rab-5C OS=Homo sapiens OX=9606 GN=RAB5C PE=1 SV=2	8.58	23710.7	11426.3	P51148	9	58.8	0	RAB5C_HUMAN	33610.1	29806.3	28981.4	28374.5	29545.7	33047.6	33100.6	31726.7	36157.4	39562.4	42486	40563.7	30194.9	29691.2	32370.2	9496	8878.5	8550.67	7354.33	7485.67	9353.67	36706.6	37575.4	34456.8	29403	28963.6	28878.1	39754.4	37814.3	38926.6	32948.7	31922.5	31936.5	29862.2	32635.5	29727	14781.4	16080	17351.3	9798	10202
Microtubule-associated protein RP/EB family member 1 OS=Homo sapiens OX=9606 GN=MAPRE1 PE=1 SV=3	4.83	30170.2	11392.7	Q15691	19	70.9	0	MARE1_HUMAN	16933	14989	15178.7	47194	50159.7	48997.7	87608.3	89087	75714.7	56049	52993.7	71883.3	85039.3	86711.3	85706.7	11443	10840.7	10266	10818	10938.7	11322.7	42748.7	51318	49988.1	52518.3	33201.3	43531	48471.3	52838.3	52481.7	51139.7	45140	43950.7	33005	33595.3	21358.7	31238.3	31514.3	31957	13564.7	15624.3
Src substrate cortactin OS=Homo sapiens OX=9606 GN=CTTN PE=1 SV=2	5.08	61757.3	11386.8	Q14247	28	49.09	0	SRC8_HUMAN	20559	20627.7	21760.7	18676.7	19659	19389.3	20748	20123.3	18843.3	21340	20658	23168.7	22878	23226.3	27313.7	26841.7	26915	31168	36217.3	34888.7	41068.3	39518	21879	39134.7	64980.7	51354.3	50260	27776.3	27434.7	27309	37198.7	34609	36870	38928	42703	38062	36759.7	42299.7	44091.7	36616.3	46458.7
X-ray repair cross-complementing protein 5 OS=Homo sapiens OX=9606 GN=XRCC5 PE=1 SV=3	5.45	83275	11380.3	P13010	37	57.38	0	XRCC5_HUMAN	31240.3	28240.3	27935	97043.3	102555	115379	76343.7	81050.7	96745.7	47130.7	59750.7	51600.7	32095.7	30787.3	45022	21121	17988.3	26075.3	34984.3	23953	34113	73612.7	73601.3	85794.7	83282	51612.7	52432.7	68002.3	66424	62717	46007.3	39604.7	45714.3	51247.7	56576	40183.7	34795	50062.3	61660	25791.7	39737.7
Importin subunit alpha-1 OS=Homo sapiens OX=9606 GN=KPNA2 PE=1 SV=1	5.09	58204.2	11378.1	P52292	11	24.95	0	IMA1_HUMAN				32183.3	30178	35827	16374	18909	18098.7	8189.67	9775.67	8388.33	4980	5055	7630	3279		4039.5		4374	4792	69419.7	69263.3	63165.7	53774.7	57168.7	55915.3	35432.7	36862.3	29246.7	13752.3	15429	14044.7	13874.7	12609.3	10096.3	8928	9500.67	9200	6983	7380
Eukaryotic translation initiation factor 3 subunit L OS=Homo sapiens OX=9606 GN=EIF3L PE=1 SV=1	5.92	66955.2	11321.5	Q9Y262	24	46.99	0	EIF3L_HUMAN				32438	33098.3	37611	26692.3	27786.7	26289.7	27531.7	28467.7	30740	3089	4645	4036.67			2576			3182	35658.7	33619	35214.3	32908	50257.7	49133.7	23331.3	21845.3	23852.7	16378	14966	19298.7	7173	8253	5904	5362.33	7983.5	6413.67	4503	4622.33
Plasminogen activator inhibitor 1 RNA-binding protein OS=Homo sapiens OX=9606 GN=SERBP1 PE=1 SV=2	9.26	45022.5	11232.8	Q8NC51	28	58.58	0	PAIRB_HUMAN	54243.7	47414.7	52477.3	71974.7	70447	67754.3	76024	68237.3	66132.3	62391	72471	63914	74735	72129.3	76182.3	75592.3	72372.7	69879	85416.7	89455.7	96678	67640.7	66291.7	63807.3	54155.3	66811	85005.3	77906.7	77516.7	81143.3	87820.3	83197.3	90697.3	113161	103626	99004.7	103788	92390	103758	111498	94203.7
40S ribosomal protein S10 OS=Homo sapiens OX=9606 GN=RPS10 PE=1 SV=1	10.72	18897.8	11231.9	P46783	6	36.36	0	RS10_HUMAN	4169	5327	7506	16126.7	18645	23471.7	13785.3	15724.7	17536.3	10592	14146	10306	6049.33	8009.5	9572.5		3974	5858	5331	13029	9846.5	15242	16362	13897	9631.5	6844.67	7459.5	9519.5	9650		6432	12174	6196	5519
Protein arginine N-methyltransferase 1 OS=Homo sapiens OX=9606 GN=PRMT1 PE=1 SV=3	5.02	43089	11228.2	Q99873	15	45.55	0	ANM1_HUMAN	8977	8588	8098	54918.3	56927.3	60091.3	56299.3	62683.3	64446.7	48497	53239.3	51889.3	8871	10120.3	13749.7	4950.67	4937.33	7498	6406.33	6024	9661.33	54860.3	55676	52991	51971.3	52518.7	49958.3	49756.3	45651.3	45155.7	45867.4	43970.3	43793.7	20048	14191.7	15052.1	11276.7	10374.3	8918.67	13234	6133
Annexin A2 OS=Homo sapiens OX=9606 GN=ANXA2 PE=1 SV=2	7.8	38832.2	11210	P07355	25	59	0	ANXA2_HUMAN	20862.7	17783.7	17892.3	78250	78914.3	71800.7	75774.7	75264.7	73036.3	80285.7	89063	85618.3	18174	18705.3	23119.3	16689	16983.7	17701.7	16714	16603.3	18129	53655.3	54106.7	53089.3	50268.3	47548.7	44890.3	59468.3	60910	59860.3	76568.7	68336.7	66401.3	33924.3	36511.7	33293.7	21918.3	25802.3	24702.3	22572.3	26491
PEST proteolytic signal-containing nuclear protein OS=Homo sapiens OX=9606 GN=PCNP PE=1 SV=2	7.79	18924.9	11162.7	Q8WW12	7	42.7	0	PCNP_HUMAN				3884.67	5205.67	5924.67	3479.33	3884.5	4675	3942	3895.67	4305.5	4046.5	4598	5382.33		4302	4145.67	4893	4655	6926.33	14774.3	15371.7	14299.3	9282.33	11925	13224.3	18008	18541	17266.7	17103.7	20627	19488.7	23223.3	24042.3	19950.3	22827.7	19721.3	27824.7	24121.7	26951.7
Putative heat shock protein HSP 90-alpha A5 OS=Homo sapiens OX=9606 GN=HSP90AA5P PE=2 SV=1	6.15	38966.2	11147	Q58FG0	14	34.13	0	HS905_HUMAN	3909.81	4554.33	4336.95	7337.54	7695.1	7717.07	12766.2	12316.8	11964.6	5392.12	5595.76	5677.32	6152.27	6719.76	6377.46	5863.74	5643.7	5259.6	7315.69	7924.65	6234.58	8924.82	9697.21	8547.31	10231.9	11288.4	9234.17	7242.98	7469.34	7683.03	6442.77	6867.19	6572.66	11186.2	11800.4	16991.7	12035.2	11440.7	12696.3	16590.2	17227.6
Proteasome activator complex subunit 1 OS=Homo sapiens OX=9606 GN=PSME1 PE=1 SV=1	5.69	28894.2	11144.6	Q06323	15	54.22	0	PSME1_HUMAN	20656	20422	20360.3	30953.3	29645.3	43279	32091.7	31589.3	46485.7	33510	42552.3	37433	21314.3	19711.3	26371	18092.3	17478.3	17973	20165	21112.3	21936	29983	29643	29947.7	29427.3	28127	28458	33602	34049.3	31025	49426	37108.3	35171.3	25963.3	26827	22129.7	20816	20737.7	22668.7	17720	20018
Proteasome subunit alpha type-3 OS=Homo sapiens OX=9606 GN=PSMA3 PE=1 SV=2	5.02	28661.4	11086.5	P25788	17	58.82	0	PSA3_HUMAN	85503	88946.7	85284	58574	57025.3	57038.3	53800.3	62370.7	65153.7	76210.7	74387.7	75887	81439.3	83985.7	80766.3	110032	104969	107517	108228	119256	123579	59635.3	57874.3	58940.7	51644	55494.3	55323	67283	60733.7	68169	83636.3	71173.3	73553.7	81621	81077	53105.3	103488	102511	97331.3	108929	100820
Clathrin heavy chain 1 OS=Homo sapiens OX=9606 GN=CLTC PE=1 SV=5	5.36	193383	11085.7	Q00610	69	52.42	0	CLH1_HUMAN	31779	33352.7	33348.3	131767	138224	143012	155123	159926	176907	103116	117318	110408	30169.3	27353	30589.7	20822.3	23569.7	20936.7	21604.7	22644.3	22782.3	142822	134979	158560	123045	116037	120084	147203	151730	149336	103349	120266	135654	89106.7	30775.2	29720.5	30096	24744.3	48622.7	14438	16023.7
Glutaredoxin-3 OS=Homo sapiens OX=9606 GN=GLRX3 PE=1 SV=2	5.15	37717.2	11030.2	O76003	12	39.1	0	GLRX3_HUMAN	31631.3	27400	28055.7	57966.3	62299.3	67025.7	54495	60322.3	64305.3	35901.7	35963	39568	30142.7	31289.7	29928	22951	19096	20977	18961.7	19579.3	19364.3	43689	45079	45053.7	44433.3	42444.3	41307.7	52950.7	52674.3	56382.7	35875.7	34731	39143	36629.7	35200	32583.3	27572.3	36329.7	40552.7	15673	17847.3
Nuclear ubiquitous casein and cyclin-dependent kinase substrate 1 OS=Homo sapiens OX=9606 GN=NUCKS1 PE=1 SV=1	4.79	27296.4	10983.2	Q9H1E3	14	60.91	0	NUCKS_HUMAN	39423.7	38549	47322.7	32651.7	29865.7	23546	31497	32852.3	21793	38074	28024	40928	56017	54858.3	34064	67098.7	67168.3	43045.7	71613	79675.7	58793.7	10880	9236.33	12836.3	12660.7	12069.7	11645.7	22523	18678	21671	23684	24280.7	23647	27069.3	21692.7	22434.7	13837	17850	7783	21749.7	17494.3
Diablo homolog_ mitochondrial OS=Homo sapiens OX=9606 GN=DIABLO PE=1 SV=1	5.59	27359	10869.4	Q9NR28	11	52.72	0	DBLOH_HUMAN	52430.7	49784.3	50648.3	32226.3	29589	33260	31968.7	32298.7	35998	42272.7	45024.3	41929	50035.7	46199.3	53856	61058.3	57536	53940.7	54332.7	60527.3	55888	39796.3	42551.3	38443.7	39643.3	37293	39131	47797	49654	46900.3	61748.3	64678	58195.3	62842.3	70533	61148.3	77210.7	71587.7	78183.3	56264	59828.7
Proteasome subunit alpha-type 8 OS=Homo sapiens OX=9606 GN=PSMA8 PE=2 SV=3	9.44	28700.9	10816.5	Q8TAA3	8	37.11	0	PSMA8_HUMAN				4704.59	5229.76	5180.96	3634.31	4565.03	4561.54													15891.1	19052.6	19837	15435.7	14865.7	15832.5	9590.78	9997.04	13121.5
Keratin_ type II cytoskeletal 5 OS=Homo sapiens OX=9606 GN=KRT5 PE=1 SV=3	7.8	62606.6	10815.6	P13647	30	43.05	0	K2C5_HUMAN	52213.2	55559.4	55669.3	20634	18510.6	21558.7	19671.7	13726	19277	25687.1	24199	25209.2	25703.6	21287.3	21692.1	144964	138812	141737	37708.4	38249.6	34519.2	30820.7	31041.1	32800.4	14902	13496	9759.39	48485.6	46659.4	49844.8	47142.1	33568.4	34885.9	56701.2	58198.3	55265.3	56539.1	50136.9	52378.8	82795.9	81983
Tubulin-folding cofactor B OS=Homo sapiens OX=9606 GN=TBCB PE=1 SV=2	4.87	27610.7	10775.6	Q99426	8	42.62	0	TBCB_HUMAN	33090	31133	31868.7	83960.3	77102.7	90746.3	80649	77790	95730.7	52019.7	69804.7	53065	35034.7	37041	47236	22226	23077.7	29852.7	23994	23588.3	28906	68225	64795.3	73253	65990.3	63778	61966.7	65560.3	69829	76394	56550	63457	63449.3	53724	48560	41621.3	47219.7	41206	49201.3	24553.7	26573.3
40S ribosomal protein S9 OS=Homo sapiens OX=9606 GN=RPS9 PE=1 SV=3	11.3	22648.5	10775.5	P46781	12	44.33	0	RS9_HUMAN	24878.7	22572.3	31642.3	43991.3	46834	48193.3	33741	33341	37357.7	24270	27630	25372.3	20515.3	19501.3	20103.3	16825.7	15621.7	13623.7	23513.3	23283	20925.3	6687	6466.67	10165.3	9296	5603	5853.33	7386.33	8831.33	9508.33	3861	2331.5	4809.67	5645.33	5121.33	3396.5	7208	6380	9146	9786	9688.33
40S ribosomal protein S7 OS=Homo sapiens OX=9606 GN=RPS7 PE=1 SV=1	10.85	22126.9	10738.9	P62081	8	52.58	0	RS7_HUMAN				9632	22651.3	21587.7	4553.5	5902.67	7287	7888.67	8032	4276		4897	3885.33							8804.67	9316.33	7503.33	11608.5	12246	13138	4155	9111	6546	4521	6425	9829	4604	2030	5006			4266
Chloride intracellular channel protein 1 OS=Homo sapiens OX=9606 GN=CLIC1 PE=1 SV=4	4.9	27264.9	10728.3	O00299	9	43.98	0	CLIC1_HUMAN	29569	29206	29806.3	81775.3	84359.3	81025	83772.3	85229.7	81220	84185	83005.7	86433	32897.7	32214.7	29293	17361	16465	14592.7	23643	22758.3	17278	73350.3	74358	67418.3	66070.3	65463	65309	77178	77063.3	62517.7	85330.7	89707.3	74899.7	38920	35659.7	35650	21168	18363.3	22320	14458.6	11837.4
Moesin OS=Homo sapiens OX=9606 GN=MSN PE=1 SV=3	6.03	67934.2	10699.8	P26038	42	63.78	0	MOES_HUMAN	20086.2	19760.4	19047.9	34347.3	35804.3	35593.7	34866	36463	39126.3	39615	34202.3	31057.9	22053.9	20194.9	23288.2	23516.7	21885.7	21449.3	23797	23349.7	25179	24684.5	25906.7	32671.1	28236.3	23155	22907.7	32165.7	32033.7	34963.7	38941.2	33897.7	36171.9	27007.7	25538.7	23621	35572.7	34699	36704.5	39721.7	28009.2
RNA transcription_ translation and transport factor protein OS=Homo sapiens OX=9606 GN=RTRAF PE=1 SV=1	6.23	28182.2	10691.7	Q9Y224	17	75.41	0	RTRAF_HUMAN	54036.3	59983.7	54602	56656.7	62456.3	55162.3	52563	59559.3	50786.7	51572	53089.3	55227.3	43468.3	42591.7	35865.3	57027	50195.3	53865.3	61883.3	61842.3	63785	25746.7	26463.7	22193	29775.3	20899	24663.3	24851.7	25036.3	20924.3	22320	18634.7	18092.7	13987.7	11573.3	9963.33	14453	12567	11417	12839	13822
Far upstream element-binding protein 2 OS=Homo sapiens OX=9606 GN=KHSRP PE=1 SV=4	6.97	73400.6	10688.7	Q92945	33	61.46	0	FUBP2_HUMAN	134278	146779	141855	132874	119324	119849	129899	120334	121034	132412	129721	135688	129077	135581	133784	134053	133250	135007	149352	150340	164828	119899	121142	108396	102229	91709	90722.3	128935	133665	125968	135709	155617	135544	146457	153366	134541	147712	133247	139025	148398	147293
Importin subunit beta-1 OS=Homo sapiens OX=9606 GN=KPNB1 PE=1 SV=2	4.49	98482	10681.4	Q14974	26	35.05	0	IMB1_HUMAN	36695.7	36259.7	37960.7	133739	130024	122920	113990	113630	110448	68650.7	67261.3	73855.3	30431.3	28010	27783.7	23720.7	23735	25382.3	27369	28140.3	25070.7	126391	118999	117768	112650	93160.7	93468	86209.7	89087.7	84882.7	52590.7	64158.7	57114.3	49077	45241.3	41518.3	45140	41351	44577.3	38273	37992
60S ribosomal protein L7 OS=Homo sapiens OX=9606 GN=RPL7 PE=1 SV=1	11.3	29282.9	10597.5	P18124	12	44.35	0	RL7_HUMAN	18563	16724.7	17520.7	48382.7	42837	49713.3	37630.3	33545.7	40366.3	23935	27766.7	26805	16790	15168.3	12110	10345.3	8269.33	6558.67	21266.3	22443.7	21602	4878.67	4522.67	6057.5	7143.5	4605.67	5900.67	5770.5	5765	5573	1926	1800
Probable phosphoglycerate mutase 4 OS=Homo sapiens OX=9606 GN=PGAM4 PE=3 SV=1	6.23	28948	10543.2	Q8N0Y7	10	49.61	0	PGAM4_HUMAN	4721.21	8878.7	9164.47	7093.41	6004.14	6881.7	8414.84	7445.68	7719.63	9491.28	10434.6	10520.3	7343.93	7032.8	6887.04	5207.34	5857.91	6522.22	4333	4506.76	5192.67	9917.66	8954.45	7236.68	9511.74	8360.37	8008.91	9625.17	9525.4	8733.02	8533.74	12571.7	9931.54	8653.27	7611.29	4851.67		2173.51	1436.81
Tropomyosin alpha-3 chain OS=Homo sapiens OX=9606 GN=TPM3 PE=1 SV=2	4.49	33007.1	10542.1	P06753	15	44.21	0	TPM3_HUMAN	113096	135285	125641	79528.7	85043.6	82069.7	79116.2	93838	87565.5	110490	103526	105692	121736	140148	118366	101368	112589	111005	144885	145931	153325	58272.8	60484.8	55520.7	53755.6	53562.3	53804.3	61655.5	66772.2	65743.9	55193.8	69218.9	73656.5	85982.2	77020.7	63160.8	99846	83139.5	86478.5	110339	97953.2
Plastin-3 OS=Homo sapiens OX=9606 GN=PLS3 PE=1 SV=4	5.27	71324.4	10510	P13797	29	46.51	0	PLST_HUMAN	35383.2	34414.5	35369.3	51360.1	48985.5	52611.7	49622.6	49337	54255.3	62888.1	72264.3	65382.1	34532.3	34363	42695	22678.8	23608.3	28825.4	24024.7	26957	25426.3	36926.9	35266.3	34708.9	34256.7	34071	33652.3	39851.1	38632.4	40951.4	44636.1	45289.8	44956.3	36108.7	38363.1	30729.7	26138	24545.7	26091.5	16086.7	17142
Nucleosome assembly protein 1-like 1 OS=Homo sapiens OX=9606 GN=NAP1L1 PE=1 SV=1	4.16	45659.3	10466.4	P55209	11	30.69	0	NP1L1_HUMAN	38301.9	45286.2	47252.1	130439	131573	124902	141722	136419	130189	99237	90039	108505	47937.6	43409.9	36434.3	34989.6	36981.9	36519.7	48237.8	52612.7	38418.7	117277	111467	115213	93220.3	84149.7	80131.7	93193.3	100382	49373.9	96835.3	106688	95641	41709	25349	38674.6	12369.1	24819.9	28288.6	8430.45	15677
Prelamin-A/C OS=Homo sapiens OX=9606 GN=LMNA PE=1 SV=1	6.61	74424.7	10451.3	P02545	43	56.17	0	LMNA_HUMAN	33623.7	39715.3	34066.7	13798.3	7404	11949	21120.3	10696.3	22087.3	40487	36777.7	42942.7	37853	32154.7	31726.3	22499.7	23429.7	15622.7	16553	15671.3	15590	31310	32511.3	38335.3	24726.3	26594.3	27228	42080	41853	46507.3	74891	79969.7	70972.3	76101.3	96543.7	77271.3	66040.3	67191	72241.3	44437.7	53901.7
Annexin A6 OS=Homo sapiens OX=9606 GN=ANXA6 PE=1 SV=3	5.27	76215.6	10420.8	P08133	45	65.23	0	ANXA6_HUMAN	10359	10664.7	12396.7	65254.3	73527.3	70127.3	59407	77007	69570.3	46700	45362.3	43588.7	15554.3	12560.7	24159	9731	9175.33	11641.7	10683	10157.3	12839.3	65318.7	57814.3	46797.3	87219	65266	59204.3	39775	58689	46209.3	28960	48796.3	38216	25653.7	27128.7	20205.7	21932	16892.7	24393.7	16529	15350.3
Glia maturation factor beta OS=Homo sapiens OX=9606 GN=GMFB PE=1 SV=2	5.01	16884.3	10372	P60983	7	43.66	0	GMFB_HUMAN	41571.7	38991.7	41357.3	23850.7	21619.6	22667.7	24386.2	21842.1	22947.7	26436.6	31371	28691.8	32443.3	32044.7	32534.7	43495.4	39664.5	41520.3	39819.7	38975.7	39605	17442.5	17315.4	17901.3	15244.9	13606.5	14659.1	22491	21817.7	22818.7	28182.3	26629.7	28139.3	32400	34009.7	39842	29387.3	28663	35082.7	25805.3	23731
60S ribosomal protein L15 OS=Homo sapiens OX=9606 GN=RPL15 PE=1 SV=2	12.11	24260.2	10349.5	P61313	8	39.22	0	RL15_HUMAN	25166.7	24069.7	25051	41291.3	39020	36157.3	42361	42885.7	40558	38795.3	37575.7	38603.7	20196.7	20041.7	20757	12480.3	12216	11579.3	23403	25128.7	22435.3	2253	2944.5	3613	1866	2560		12070.3	5383	5295	2548	2840	3015	7014	10321.3	5675	8011	2688		5222.33	4047
Rab GDP dissociation inhibitor alpha OS=Homo sapiens OX=9606 GN=GDI1 PE=1 SV=2	4.81	51210.1	10322.7	P31150	23	56.38	0	GDIA_HUMAN	18353.4	19042.4	18651.2	27980.9	27750	29938.3	26354.1	26196.8	29751.2	34476.1	37653.7	33900.9	12578	11265	13322.7	3887.55	3904.41	4921.69	4667.36	4433.41	5482.55	23534.7	19016.5	19751.8	16887.4	17728.8	17882.5	26751.4	26603	27601.6	29589	25926	24742.3	22477.3	22870.3	19273.5	12409.7	9227.02	10922
Putative beta-actin-like protein 3 OS=Homo sapiens OX=9606 GN=POTEKP PE=5 SV=1	5.92	42358.5	10320.4	Q9BYX7	8	22.93	0	ACTBM_HUMAN				6964.81	6631.39	7787.33	9889.15	10069.5	9632.16	4559.24	5803.47	4416.1	6631.07	5912.42	6196.92				2200.25	2215.04	2691.9	23750.6	24088.5	22619.3	61908.2	45578.6	63001.2	49849.4	33658.1	29003.1	44449.6	25971.8	33808	24139.6	19936.5	25848.2	10108.6	9793.13	9801.87
Cyclin-dependent kinase 1 OS=Homo sapiens OX=9606 GN=CDK1 PE=1 SV=3	8.81	34152.5	10272.1	P06493	17	70.37	0	CDK1_HUMAN	12121	11974	11090.3	34537.7	39965.3	37768.7	24877.7	28562	26507	14620	12475.3	15910.7	9432.33	10757.7	11729	10495	10765	11239.5	12416	12991.5	10299.3	52078.3	54760.3	53037.7	40983	43908.7	45531.7	30019.7	27250.7	28930	12127.5	14685.7	12344	16283	15801.7	11515.3	25261	12913.7	20536.3	23419	15472.3
U6 snRNA-associated Sm-like protein LSm8 OS=Homo sapiens OX=9606 GN=LSM8 PE=1 SV=3	4.13	10402.7	10255.5	O95777	8	100	0	LSM8_HUMAN	17813.3	16601	15370.3	25032	26706.3	28418.3	36516.7	39275.7	40861	28242.3	30258.7	24515.3	28736.7	32678.7	29077	17001	22909	15928.3	23547.7	27963.3	29886	38763.7	37068.7	36547.7	43189.7	43930.3	42074	34054.3	35134	35640	15151	33374.3	33755.3	26739.7	26103	37141	25545	20926.7	23043.7	27525.3	25482.3
Septin-2 OS=Homo sapiens OX=9606 GN=SEPTIN2 PE=1 SV=1	6.17	41715.7	10210.6	Q15019	18	63.99	0	SEPT2_HUMAN	43562.3	47658	48831.7	37880.7	42080.7	40053	34505	43635	45461.3	53678.7	53660	47783	54980.7	55198	61017.7	48394.7	47581.3	38223.7	27389.3	30914.7	29694.7	29686.3	29823.3	34484.3	33257.7	31340	32087.7	29863.7	31660.7	34253	39338.3	37238.3	41049	39939.3	39127	34091.3	46784.3	41531.3	39396.3	16435.3	15166.7
Ubiquitin thioesterase OTUB1 OS=Homo sapiens OX=9606 GN=OTUB1 PE=1 SV=2	4.66	31512.2	10194.4	Q96FW1	10	48.34	0	OTUB1_HUMAN	11366.7	10245	13803	36779.7	37083	43989	36364.3	38351.7	45620.7	39646.3	47709	38231	11773.7	13707	14934.7	5694	6644.33	8355.33	6420.67	6890.33	11010.7	32787.7	32076	26597.7	26123	27276.7	29644.3	37185.3	37059	29337.3	40399	38969	30259.7	18316.3	21714	22550.7	11412	12093.3	13608.3	11206.5	8749
Transaldolase OS=Homo sapiens OX=9606 GN=TALDO1 PE=1 SV=2	6.41	37711.3	10172.4	P37837	18	47.48	0	TALDO_HUMAN	47442	45789	45322.3	73991.3	88651.3	89158	82691.7	89126.3	90940.3	74114.3	85835	75281	49492	46911.7	52904.7	44358.3	42804.3	41031.3	45179	44648.3	46986	68839.3	69212	71472.7	67524	59922	60636.3	75528.3	73240.7	74359.7	80395	72364.3	73742.7	60472	59213.3	72712.7	46721	46252.3	49278.3	30392	34608.3
ADP-ribosylation factor 4 OS=Homo sapiens OX=9606 GN=ARF4 PE=1 SV=3	7.05	20624.9	10170.2	P18085	11	71.11	0	ARF4_HUMAN	21787.1	19656.6	19313.7	16119.9	16007.6	28016.6	16815.4	13993.2	24132.6	13775.2	15412.1	15745.5	10076.3	10524.7	9905.59	22290.3	19057.7	18144.8	20903.9	20449.4	18348.3	19612	18833.8	25649.4	23713.6	15846.1	16700.6	10127.3	10474.7	9634.67	9423.62	9476	10533	12419.4	6814.74	6599.28	7338.12	12016	12005.5	5872.96	3905.82
Glucosidase 2 subunit beta OS=Homo sapiens OX=9606 GN=PRKCSH PE=1 SV=2	4.13	60395	10148.2	P14314	19	32.01	0	GLU2B_HUMAN	131176	136887	128807	124298	123236	134197	132307	128030	137783	132816	151854	140685	145044	147477	158018	140722	130751	148055	157922	158492	182362	127154	127936	127275	128018	112049	116048	144871	143397	129281	156353	164785	151531	149182	163746	167500	163881	176201	153737	170062	165752
Peroxiredoxin-5_ mitochondrial OS=Homo sapiens OX=9606 GN=PRDX5 PE=1 SV=4	8.98	22314.6	10134.5	P30044	8	42.99	0	PRDX5_HUMAN	69301.3	66467	65252.7	43658	47518	44775.7	46407.7	49361	43139	62010	50698.3	59983	64700.3	63846.7	60698.7	36050.7	34714.7	33025	24618.3	24582.7	23277.3	31553.3	31653	31065	24413.3	25561.7	24336.7	40089	44412	29705.3	51893	46411.3	44102.3	58371.3	44786	43113	33962	42322.3	36129	35653	16217.3
D-aminoacyl-tRNA deacylase 1 OS=Homo sapiens OX=9606 GN=DTD1 PE=1 SV=2	8.44	23594.7	10078.4	Q8TEA8	8	54.07	0	DTD1_HUMAN	21851.7	23868.7	24501.3	11315.7	10567.3	14625.7	13089	12018.3	12965.3	17182	22018.7	22213	22459	22262.7	23663.7	30796	31206.3	33797	31653.7	33057.7	36696.7	6505.33	8517.5	6948.67	5395.33	5692.67	5729.67	8960.5	8547.33	9710.33	13176.7	11721.7	12502.7	17429.7	15978.7	13912.3	18078.7	17715.3	18050	19274.7	17631.7
Ubiquitin-conjugating enzyme E2 N OS=Homo sapiens OX=9606 GN=UBE2N PE=1 SV=1	6.18	17194.9	10054.6	P61088	7	51.97	0	UBE2N_HUMAN	20676.3	18742.3	19862	37017.7	36292	58997.7	33692	32456.3	59432.7	35562.7	58066.3	36557	18527.3	18494.3	40326.3	18305.7	16154.3	26124	19944.7	13295.3	22115.3	54493.7	56934.7	54593.7	50413.3	46750.7	49292.7	61100	60523	61330	56252.7	58561.7	62867	50667.3	54882.3	75161.3	52878.7	53237.3	50875	33432.3	35921
Heterogeneous nuclear ribonucleoprotein H2 OS=Homo sapiens OX=9606 GN=HNRNPH2 PE=1 SV=1	5.88	49548.8	10042.3	P55795	15	37.86	0	HNRH2_HUMAN	22307	20244.7	20240	14299.4	13301.8	15195.6	25008.9	23064.9	26678.9	16264.9	19065.6	16683.2	22628.3	21470	24386.2	20389.8	18426.8	21081.8	23582.3	22611.7	25736.2	18233.8	15785.2	14839	14428.1	13755.8	15755	19604	23333.2	22442	21466	24605.4	20655.8	51863.8	51326.6	26960.1	43408.1	39685.8	41450.9	23586.8	22155.5
SUMO-activating enzyme subunit 2 OS=Homo sapiens OX=9606 GN=UBA2 PE=1 SV=2	4.97	71794	10017.8	Q9UBT2	30	52.5	0	SAE2_HUMAN	25272	22168.3	25043	48666.7	46539.3	53463	54395.3	49630.7	58584.7	53274.3	66603.7	58076	24221	24616.7	27682.3	18384.7	17136	17612.3	21101	19981.7	21207.3	37921.3	37081.3	35641	30129.7	29692.7	29080	42216	43332.3	40150.7	41552.7	43391.3	40263.3	25773	31849	23914	24288	24522.3	28078.7	18117.7	28427.7
Serine/threonine-protein phosphatase 2A catalytic subunit alpha isoform OS=Homo sapiens OX=9606 GN=PPP2CA PE=1 SV=1	5.18	36164.5	9975.28	P67775	9	27.18	0	PP2AA_HUMAN	27109.3	25043.7	26251	35068	34340	42456	35949.3	37505.3	44295.7	40923	50612.7	47005	28821	25792	29005	22661.7	22592.7	23712.7	16470.7	15518	15692	38738	36484	36493	31714.7	28548.3	28111	41858.7	38806.7	22797	43497	45121.3	44637.7	34833.3	23895.7	25997	20947.7	15577.7	23964		10903
Cytosolic acyl coenzyme A thioester hydrolase OS=Homo sapiens OX=9606 GN=ACOT7 PE=1 SV=3	8.55	42480.4	9960.69	O00154	13	39.47	0	BACH_HUMAN	63969.3	76496.7	79031.7	65314	66165.7	64351.3	63050.7	65062	60726.7	75225.3	75358	79902.3	78018	74772.7	74207.7	88391.3	82477.3	74543	58378.3	60519.3	57221.7	52150	49661.3	51920.7	51978	38931.3	39455	53041.7	50777.3	48944	58693	63440	67739.7	67050.3	57071.7	50405.3	25991.7	32129.7	36770
Ribose-phosphate pyrophosphokinase 2 OS=Homo sapiens OX=9606 GN=PRPS2 PE=1 SV=2	6.18	35168.4	9840.5	P11908	13	49.37	0	PRPS2_HUMAN	14661.2	18624.6	23474.9	60486.6	54681	62580.7	53676.9	50815.8	51035	59069.7	61438.7	60390	30095.6	28213.8	27803.3	34495.9	36486.7	30832.6	26911.9	26800.3	18866.3	53221.5	51079.5	41649.6	32507.4	32224	32498	26409.8	20735.7	18399.7	22284.3	45698.7	42423.7	23897	9045.06	9796.49	6571.38	5845.27	5866.42
Proteasome subunit alpha type-6 OS=Homo sapiens OX=9606 GN=PSMA6 PE=1 SV=1	6.39	27855.7	9824.41	P60900	9	35.37	0	PSA6_HUMAN	108673	117565	109896	75694.7	84663.7	83954.3	69525.7	77715.3	70702.7	90967	96761	96612.7	89109	96549.7	88582.3	121907	112622	129002	126926	137649	143628	68244.3	75577	77450	76591.7	60718.7	62285	78433.3	74452	86094.3	107632	92630.3	97673.3	109788	97630.3	120179	114577	111263	105473	123195	116481
Serine/arginine-rich splicing factor 1 OS=Homo sapiens OX=9606 GN=SRSF1 PE=1 SV=2	10.75	27858.7	9807.77	Q07955	14	37.9	0	SRSF1_HUMAN	19566.7	17715	18539.7	24723	25398.7	37057	18672	18357.7	29992.3	16089	25795.7	16402.3	17104	14934.7	18384.3	24387.7	23665	27615.7	38097.3	40669.7	56477.7	42444.3	46376.7	43014.7	41981.7	41806	39759.3	64441	58431.3	58599.3	72052.7	58412.3	55167	64853	72477	67780	89906.7	93434.3	93359.7	161420	143585
Ras-related protein Rab-8A OS=Homo sapiens OX=9606 GN=RAB8A PE=1 SV=1	9.55	23839.3	9738.13	P61006	8	39.61	0	RAB8A_HUMAN				6214.67	5757.67	7282.03	7052.33	6282.93	7430.02	5927.76	8708.26	7307.87	4122.5	4728.5	7122.5							7789.36	11302.8	10095.5	9213.17	8901.61	8798.32	7459	7662.33	8493	4644.19	7919.21	5259.61	7043.04	6170.24	7293	3211.53	4156.28	3143.27
Ubiquitin-conjugating enzyme E2 L3 OS=Homo sapiens OX=9606 GN=UBE2L3 PE=1 SV=1	8.82	18032.7	9730.73	P68036	6	53.25	0	UB2L3_HUMAN	31076	24705	25546.3	38579.7	44221	50703	33297.7	35879.3	46318.7	39689.3	49268	33629.7	37382.3	42516	54606	20389	22688.7	27370.7	23827.7	24866.3	29880	28125.5	31851.4	31132.7	29406.2	28462.7	31810.3	37027.3	37295.3	30148.3	44529	51776.9	43334.6	41056.3	38502.7	49434	40395	39889	41975	31835	33041
Keratin_ type II cytoskeletal 8 OS=Homo sapiens OX=9606 GN=KRT8 PE=1 SV=7	5.34	53704.4	9715.05	P05787	28	53.21	0	K2C8_HUMAN	44413.3	44306.7	50989.7	57981.7	52758	59964.3	63637.3	60254.7	68544.3	57792	58330.7	62719.3	46510	44026.3	45205.3	41274	46700.7	46432	48003.7	52150.3	49288.3	50601	49185.7	49044	40186	37169.7	39825.7	59025	53146	54110	105641	82692.7	68312.3	40795.7	44085	46693.7	23461.3	22959.7	23135.3	21170	18344.7
Signal recognition particle 14 kDa protein OS=Homo sapiens OX=9606 GN=SRP14 PE=1 SV=2	10.74	14684	9697.83	P37108	3	25	0	SRP14_HUMAN	32448	31034	30820	10163	9796.67	12025.7	15723	15228.5	19493.5	15425.5	19661	14249.5	34784.5	37625.5	40129.5	12675	12433.5	8331.67	8671	17078	7112.5	20188.3	20388.7	23476	36817.3	31310.7	33643.3	28078	26576.5	24698.5	9380	30670.3	36831.5	38584.5	38395.5	8370	72661	79942	42969.5	9236	13405
Thymidylate synthase OS=Homo sapiens OX=9606 GN=TYMS PE=1 SV=3	6.59	36001.2	9574.52	P04818	12	38.66	0	TYSY_HUMAN				5352	6047.33	7404.33	3573	3520.67	10325						5313			9911		5616	10652	21892	22993.7	20751.3	21927.7	17329	18069	14172	13611.7	10758.3	4264.67	6873.67	4211	3976.33	4209.67	4447			4860
Histone-binding protein RBBP4 OS=Homo sapiens OX=9606 GN=RBBP4 PE=1 SV=3	4.56	47940.9	9571.63	Q09028	16	51.29	0	RBBP4_HUMAN	48947.3	48976.9	46767	29315.2	29787.9	31652.2	34246.9	34259.7	34931.5	36520.6	39626.5	40555	44204.3	45800	47130.2	31176.6	25859.6	28402.2	20462.1	21013.6	20240.3	43535.6	40979.8	41850	31917.6	31955.4	32259	45928.8	49683.1	45764.2	62636.9	60692.1	61400.5	72718.2	70307	60715.3	56891.4	62838.9	68935.3	27367.2	35773.5
Puromycin-sensitive aminopeptidase OS=Homo sapiens OX=9606 GN=NPEPPS PE=1 SV=2	5.37	103961	9508.82	P55786	45	55.17	0	PSA_HUMAN	68647.3	69903.7	72146	62316.3	63931.3	64802	69104	68346.3	73054.7	74232.3	80464	83609.7	82904	75688	74526	72353.7	66365	67610	39683.7	38773.7	40339	54029	54917.7	53430	50138	45246.7	45237	65182	62297	54891	60744.7	66197.3	63705	53504.7	58818	44681	57566.7	56661.3	57101.7	16286	14705.7
Alpha-actinin-1 OS=Homo sapiens OX=9606 GN=ACTN1 PE=1 SV=2	5.11	103628	9495.58	P12814	47	58.86	0	ACTN1_HUMAN	52997.4	50540.4	51528.3	44351.7	43305.3	36030.3	47506	45178.3	34735	53412.3	52071.4	53018.9	63674	59084.3	50744.5	15909	14961.9	12534.6	12940.6	12775.2	9600.84	24549.3	26550.7	26395	25087.4	20244.3	20296.7	26782.4	26421.8	29747.8	22472.6	26923	28458.7	34341.6	34575.7	29849	27120	27079.1	27511.5	9451.65	9025.47
Endothelial differentiation-related factor 1 OS=Homo sapiens OX=9606 GN=EDF1 PE=1 SV=1	10.71	16368.7	9456.15	O60869	6	40.54	0	EDF1_HUMAN	7099	5182	9077	6698	5813.5	6361	10606	10461	5750.33	6533	7262	7199	11575	10465	11003	7122	5955	8501	11402	12403	8983.5	8660.67	11776.5	10348.3	14781.3	13980	14120	11003	13562.5	13227.7	12541.5	11538.5	12380.3	13877.7	13884.5	12113	12106.3	13488	19184	9293.33	13378.7
U6 snRNA-associated Sm-like protein LSm2 OS=Homo sapiens OX=9606 GN=LSM2 PE=1 SV=1	6.11	10948.6	9428.51	Q9Y333	7	56.84	0	LSM2_HUMAN	8888	34071	39226	13466	15210	8982	13475	11751	20089	25309	28632	20336	41013	30449	41852	36973	51112	47206	49828	54112	49112	12706.7	33729	27039	15011	15322.5	14894.5	27426	23431		23980	33162.5	30433	26359		12951.3
Chromobox protein homolog 1 OS=Homo sapiens OX=9606 GN=CBX1 PE=1 SV=1	4.66	21531.9	9398.64	P83916	6	36.22	0	CBX1_HUMAN	18918	19253.3	22386.3	22241.8	20590.2	21260.2	20772.1	21384.5	21846.6	25074.5	25562.9	20728.5	25659.2	26118.2	30016.5	11806.2	22195.3	24245.3	25501	25723.7	27232.1	28776.3	27354.3	24124.7	23234.7	24642	22919	37801.3	35505	33173.3	50650	43059.3	36574.7	42419.3	49709.3	83877.5	46654.3	49450	47456.3	52792	48578.3
Septin-7 OS=Homo sapiens OX=9606 GN=SEPTIN7 PE=1 SV=2	8.97	50965.2	9386.06	Q16181	19	44.16	0	SEPT7_HUMAN	21484.3	19017.7	22447.7	32249.7	32927.7	38601.7	33806.7	33887.3	40940	39449.7	52863	39422.3	23134	23047	22979	15441	10757.5	6073.33	16617	13844	7554	33901	34865.3	33816	34294.7	37642	35966.7	37970.7	38152.3	35447.7	43047	40491.3	44785.3	35400.7	36150.3	29867.3	18989.7	31249	16512.3	41328	19418.5
Gamma-enolase OS=Homo sapiens OX=9606 GN=ENO2 PE=1 SV=3	4.72	47610.8	9361.02	P09104	18	67.28	0	ENOG_HUMAN	19777.7	22056.4	23337.5	15149.8	15414.1	16221	16501.8	18230.3	18975	20012.3	23888.3	20052.1	23244.2	24948.5	21113	15389	18658.3	19611.1	10674.7	12049.7	13193	9350.2	9439.26	10756.6	9690.76	10936.2	11720.5	10354.3	9455.16	10532.4	10551.3	15003	13678.9	16208.5	8737.48	14022.2	14536.3	7505.65	7905.67	11901.1	4212
Small nuclear ribonucleoprotein Sm D3 OS=Homo sapiens OX=9606 GN=SNRPD3 PE=1 SV=1	10.97	14030.4	9329.73	P62318	3	19.84	0	SMD3_HUMAN	44322.5	41303	44589.5	45139.5	49557.5	47642.5	27463.7	42583.5	38540.5	44271	44500.5	55495	39518	36525	31107.5	46667	39541.5	39155	48855	50430.5	49499	52693.3	53729.7	84138	83417	39228	63169.5	62648.7	82869.5	74926.5	106654	74907.3	123647	125005	64682.7	84147.5	79645.5	54706.3	64358.7	127008	70244
Cyclin-dependent kinase inhibitor 2A OS=Homo sapiens OX=9606 GN=CDKN2A PE=1 SV=2	5.43	16589.7	9319.86	P42771	7	55.77	0	CDN2A_HUMAN	18142	10709.5	11228	11126	12590.6	15012.9	10077.7	12298	12326.3	11298	10874.3	12264.3	10739	11481	11382.3	14308	14938	6831	17351	17357	9589	14692.8	19675.2	21249	25848.9	19687	18936.1	17640.7	18863.8	20528.3	15327.3	17354.3	24885	20146.7	19632.3	21935.3	15118.3	19279.5	17296		10156
U1 small nuclear ribonucleoprotein 70 kDa OS=Homo sapiens OX=9606 GN=SNRNP70 PE=1 SV=2	10.46	51613.8	9313.91	P08621	18	50.57	0	RU17_HUMAN	5180	5474	4786	29003	27431	27987	29572	29286.7	25071.3	16078.3	15556.3	17028.3	5530.67	6819.33	6981	5816	5789	5341.33	6863	6909.33	8255.33	82911.7	80861.3	79078.3	72477.3	66796.7	66624	88838.3	89614.3	74229	52077	42370.7	39959.7	25026.7	21233.7	21443.3	17218	17509.7	18882.7	9519.33	9310.33
Keratin_ type I cytoskeletal 19 OS=Homo sapiens OX=9606 GN=KRT19 PE=1 SV=4	4.86	44106.1	9303.28	P08727	33	76.25	0	K1C19_HUMAN	45390.6	48328	45408.2	47650.6	50934.5	50766.3	50946.9	57614	58691.5	51309.9	53219.6	53623.9	44365.9	43079.9	45316.6	34515	33516	51860.3	46134	45947.9	48975.4	22887.2	23959	25132.8	18498.3	17652.8	16895.1	25520.7	24955.1	28241.5	36268.5	32911.5	36912.1	20964	18345.7	15719.8	21936.9	18706.8	19729.5	19902.2	16481.7
26S proteasome regulatory subunit 8 OS=Homo sapiens OX=9606 GN=PSMC5 PE=1 SV=1	7.41	45797.2	9300.84	P62195	21	55.91	0	PRS8_HUMAN	7956.67	8958	7673	37325	32881.3	47927.7	29913	31479.3	47030	17734.3	27161	19373.7	10471.7	9272	14766	4067.33	4871.67	7356.67	5858	5464.33	9293	27272.7	26838.3	38879.7	29027.3	18842.3	20360	25615.3	30693.7	28430	20242.7	20890	22703.3	16091	19242	12108	11978.3	11579.3	10878	16971	15760
Tumor protein D52 OS=Homo sapiens OX=9606 GN=TPD52 PE=1 SV=2	4.59	24384.1	9297.94	P55327	8	43.3	0	TPD52_HUMAN	41607.3	33573.3	34383	48535.3	54187.3	44082	41309.3	42840.3	42334.3	36869.3	31348	37049	37687.3	33820	36404.7	45796	41794.7	44458.7	51427	50952.7	47344.3	53902	46452	53898.7	49414	40614.3	44242.7	42164.7	51630	45632.7	36134.3	43027.3	41325.3	32392	28972.7	26135.3	28622.7	27947.3	26924	26447.5	24463.3
Activated RNA polymerase II transcriptional coactivator p15 OS=Homo sapiens OX=9606 GN=SUB1 PE=1 SV=3	10.31	14395.4	9294.36	P53999	15	78.74	0	TCP4_HUMAN	68488.3	73536	70902.7	94997	91255.7	92801	99554.7	95458	94103.3	89555.3	86444.3	92622.3	75193	72739	68897	61935	51671	43516	69665	68202.3	67508	96827.7	99273	82883.3	56147.3	57477	53845	103767	104954	86678.3	117249	112434	95462	103183	107503	73338	90013.7	89416	90098.3	92214.3	89604.3
U2 small nuclear ribonucleoprotein A' OS=Homo sapiens OX=9606 GN=SNRPA1 PE=1 SV=2	9.05	28529.7	9290.94	P09661	13	47.06	0	RU2A_HUMAN	33582	32248.7	32469	26307	27902.7	27325	23214	14907	22121	27224.3	27501	21022.3	23502	24792.3	22662	19353.3	17572	12911	22125	17593.7	11659.3	43097	43878.7	42708	37190.3	42101.7	42806.3	50050.3	51605	40461	61244.3	59033.7	56621.3	63707	64648	62920.3	39519.3	41154	47396	8931.67	10565
Histone H2A.V OS=Homo sapiens OX=9606 GN=H2AFV PE=1 SV=3	11.28	13508.7	9271.33	Q71UI9	4	31.25	0	H2AV_HUMAN	23585.7	21912.9	22507.5	21495.9	22787.6	21228.3	16851.9	17068.8	15981.2	17983	16055.2	19146.3	15393.8	15148.5	12881.8	22566.9	20323.8	17684.6	29942.8	31935	26157.2	29322.9	31152.5	29011.1	27528.5	27170	24965.4	26047.5	36906.9	37510.7	13238	29282.9	30783	47507.3	45320	81840	41361.7	37107.7	38287.7	80228.5	67500
Eukaryotic translation initiation factor 3 subunit K OS=Homo sapiens OX=9606 GN=EIF3K PE=1 SV=1	4.62	25344.9	9195.71	Q9UBQ5	2	10.55	0	EIF3K_HUMAN																										1407
40S ribosomal protein S17 OS=Homo sapiens OX=9606 GN=RPS17 PE=1 SV=2	10.45	15607.2	9190.1	P08708	4	34.07	0	RS17_HUMAN				10681	8733	10619	6856	6829	7245	4982	5679	6337										8268	7624	10037	6163	3723.5	3144	6886	6981	9117		7488	8331	5662	5940
RNA-binding protein FUS OS=Homo sapiens OX=9606 GN=FUS PE=1 SV=1	9.57	53654	9184.02	P35637	13	27.57	0	FUS_HUMAN	91742.5	91298.7	88069.6	93108.2	94177.2	106782	104433	103959	116917	96025.6	110236	98609.4	138189	132603	152704	111669	98802.4	118305	94510.6	100480	118267	105467	95666.7	107909	87954.4	76812	71121.2	103347	120338	118142	111550	121926	137688	146670	146267	104599	162278	152418	169370	133634	147038
Keratin_ type II cuticular Hb4 OS=Homo sapiens OX=9606 GN=KRT84 PE=2 SV=2	7.43	65983	9144.6	Q9NSB2	20	35	0	KRT84_HUMAN	7768.56	5695.85	6707.11	18435.7	15079.3	21075	16517.3	12674.7	18369.5	8783.7	10836.3	9674.94	5457.79	4537.53	6101.19	5221	3131.52	4600.13	4096.98	3463.45	5150.19	40345.4	36653.3	50736.4	45320.4	9370.38	17001.1	48820.3	55486.1	50612.4	36141	55812.6	60235.5	50486.2	39505.2	43395.7	34442.2	31994.8	30352.3	35602.7	34591.7
Neutral alpha-glucosidase AB OS=Homo sapiens OX=9606 GN=GANAB PE=1 SV=3	5.72	107330	9133.24	Q14697	42	53.71	0	GANAB_HUMAN	42821	37283.7	40072.3	68662.3	65697.7	76125.7	68780.3	65746	75346	51021.3	66283	55052	38939.3	37477	40245	51899.7	44668.3	49451.3	49609	54759.7	56902	78614	77099	85943	89264.7	72659	99062.7	73149.3	69935.7	73847.7	50029	45475	59766.3	53268	45996	38821	53339	49564	51959.7	60566.3	54099
26S proteasome non-ATPase regulatory subunit 11 OS=Homo sapiens OX=9606 GN=PSMD11 PE=1 SV=3	6.07	47749	9124.78	O00231	28	66.59	0	PSD11_HUMAN	8728.33	9587	9485.33	49576.7	49746.7	55972.3	48857.3	44469.3	50953.3	23810.7	27195	28545.7	10459.7	9356	9623.33	5181.67	5747	7257	6802.67	7096.67	8433	49791.3	48122.3	50987.3	50349	39622	37654	44709.3	42685.7	35632.3	28522.3	32755	29702	17575	16066.7	16903.3	10362.3	9326.33	12385.3	5128	6609.33
Nicotinamide phosphoribosyltransferase OS=Homo sapiens OX=9606 GN=NAMPT PE=1 SV=1	6.78	55806.3	9117.32	P43490	30	65.99	0	NAMPT_HUMAN	41942	43599.7	46234.3	43152.3	38860.7	42853	45331.7	46645.3	45426.3	54298.7	53523.7	58906	54851.7	52529.3	52334	7962.33	8040.33	8330.67	4976.33	5167.67	6844	35255.7	33392.3	34866	32616.3	28166	48979.7	33984	35402	24558.7	44497.3	66287	43800.7	37334.3	53815	25320	17485.7	22274.7	22976.3		5974
Phosphoglycerate kinase 2 OS=Homo sapiens OX=9606 GN=PGK2 PE=1 SV=3	8.76	45195.4	9114.64	P07205	16	39.57	0	PGK2_HUMAN				12822.8	12700	13729.9	7332.07	7177.02	8211.98	3575.96	3910.76	3551.25	11428.1	13056.9	8819.2	11252.3	10806.5	12457.5	15397.4	14489.3	15862.3	9257.63	9744.52	9943.28	10597.4	8881.3	9961.36	7553.24	7838.69	8424.75	4810.54	5952.6	6466.46	5700.4	4309.8	4489.76
28 kDa heat- and acid-stable phosphoprotein OS=Homo sapiens OX=9606 GN=PDAP1 PE=1 SV=1	9.56	20630	9104.75	Q13442	9	48.62	0	HAP28_HUMAN	15062.7	14202.3	15659	12427.3	12865	17461.3	14218.3	13724.3	18989.7	14422	17778.3	15153	23976.7	22998.7	25066	19956.7	19316.7	19250	29971.7	28154.7	32013.3	19892	18478.3	19267.7	18054.3	18375.7	19890	24324.7	24154.7	20518	30259.3	28507.7	24021.7	24985.7	27082.3	24875	24130	26518.3	20987.7	22199.3	27245
D-3-phosphoglycerate dehydrogenase OS=Homo sapiens OX=9606 GN=PHGDH PE=1 SV=4	6.31	57392	9095.18	O43175	17	32.83	0	SERA_HUMAN	139428	134074	126967	135534	136300	149724	135949	131724	146087	138599	156931	123496	116161	94243	140606	53974.3	13064.7	74815	57272.3	14429	90378.7	151847	128789	159191	125710	90179.7	94325.7	162069	165390	167767	160251	154412	166287	161311	136715	150461	152908	148897	132738	136326	140343
Keratin_ type I cytoskeletal 17 OS=Homo sapiens OX=9606 GN=KRT17 PE=1 SV=2	4.78	48390.9	9091.3	Q04695	30	59.72	0	K1C17_HUMAN	18220.2	17956.8	16433.7	22816.4	23616.2	26703.9	22982.2	24575.6	26224.2	15384.1	17461.1	16704	21571.2	21595.6	26709.9	40647.4	40307.2	44467	9100.53	8934.34	10143.7	24665.2	26108.4	23661	22069.1	22701.7	22984.7	23434.9	23248.1	21952.8	18855.1	16663.7	17718.4	21767.7	21709.7	19497	17031.8	14581.9	16216.4	26775.7	23298.4
Acyl-CoA-binding protein OS=Homo sapiens OX=9606 GN=DBI PE=1 SV=2	6.17	10044.4	9067.92	P07108	4	60.92	0	ACBP_HUMAN	12938.3	16914.3	17507.7	12247.5	8052	16241.5	11453.5	10203	11809	13204	11124.5	14256	15359.7	14707.7	17969.7	15631	15577.7	15666.7	19233.3	18769.3	18764.7	12566.5	12055	8367	5697.5	7927	8076	7720.33	12736	14869	14636	10027	11097	18967	17382	13023		6208	5829
Electron transfer flavoprotein subunit alpha_ mitochondrial OS=Homo sapiens OX=9606 GN=ETFA PE=1 SV=1	8.5	35421.8	9015.27	P13804	13	48.05	0	ETFA_HUMAN	97023.3	100104	77971.7	80964.3	90690.7	76514.7	86293.3	104255	104830	106703	96264.7	90070.7	79887	84947.3	103750	56754.3	56296	55085.3	76397.7	62261.7	60161.7	94737.3	129395	129994	84813.7	76149.3	117965	99232.3	145176	97042	127208	67753.7	137779	119013	34026.7	103482	120329	89115.3	150652	75615.3	60595.7
Dihydrolipoyl dehydrogenase_ mitochondrial OS=Homo sapiens OX=9606 GN=DLD PE=1 SV=2	7.77	54747.6	9002.83	P09622	19	41.26	0	DLDH_HUMAN	108014	115595	107921	69592.3	70262.3	77471	75830	78684.7	88494.3	88733	101182	83080	126210	125514	150600	116715	120290	143333	128187	150319	171413	90287	87942	92873.7	93150.7	218691	203220	98584.3	97659.3	90985.3	142454	121006	114104	136957	147226	145818	156181	179192	158642	157586	153048
Heterogeneous nuclear ribonucleoprotein U OS=Homo sapiens OX=9606 GN=HNRNPU PE=1 SV=6	5.66	91325.9	8995.09	Q00839	26	35.03	0	HNRPU_HUMAN	23753.3	22512	23441.3	147540	146430	143974	61908.7	68296	72934	32258.3	36141.7	32616.7	23677.7	24557	28219	17633.7	16618.3	19708	27987.7	27054.7	30653.7	126759	128387	113295	75762.7	85024	86899.3	42769.7	42751	39661	19419.7	19573.7	18651.7	18143.3	18714.3	14795.7	12566	12248.7	13957.7	21308.3	22558.7
Tyrosine--tRNA ligase_ cytoplasmic OS=Homo sapiens OX=9606 GN=YARS PE=1 SV=4	6.67	59485.7	8965.18	P54577	32	55.68	0	SYYC_HUMAN	6116.67	6452.33	7117	47014.3	48516	55668.7	30209.3	30067.3	33829	15774	12448.3	13077	7951	8192.67	9165.33	3368	5207.67	6944.67	7271	6341.67	8452.33	35665.3	34956.7	32060	31635.3	27120.3	26832.7	14883	12110	11834.3	6975.33	8821.67	10116.7	10043	10170.3	6818.67	9239.67	9663.67	9815.33	8720.67	9866.33
Transcription factor BTF3 homolog 4 OS=Homo sapiens OX=9606 GN=BTF3L4 PE=1 SV=1	5.95	17270.6	8946.36	Q96K17	5	42.41	0	BT3L4_HUMAN	26781.5	27211.3	27813	34348	33820.3	35775.3	23118	28465	32310.3	37552.7	42739.7	28313	31746.7	37552	42961.7	30495.3	38311	50253	40900.7	46508	59725.7	12657	12413.5	8923	14022.3	18132.7	18828	14216.3	14814.7	14110	16543.5	23219	15805	16776.7	24491.5		24336	28200.5	29477	29436.5	35331.5
Nuclear autoantigenic sperm protein OS=Homo sapiens OX=9606 GN=NASP PE=1 SV=2	4.06	85523	8931.62	P49321	41	65.74	0	NASP_HUMAN	96856	104597	105653	123759	114010	134726	120107	120332	137224	123833	146373	128783	103971	105269	108793	109426	101620	107450	110388	121480	132166	79192.3	81544.7	83687	79978.7	75115	79605.3	88569.7	87462	93038.7	113549	113261	101133	87635.7	92904.7	81240.7	91793.7	100299	88206	114480	102228
THO complex subunit 4 OS=Homo sapiens OX=9606 GN=ALYREF PE=1 SV=3	11.68	26887.9	8905.51	Q86V81	7	36.19	0	THOC4_HUMAN	5361	16742.7	7963	29211.7	27356.3	36546.7	32147.3	31491	33145.3	23486	28227	25365.7	22678.7	14186.7	21692	8228	15200.7	9337.33	15198.3	19475	15191.7	39298.7	42285.3	39024	58505.3	52591	53415.7	34533.7	32719.7	30959.3	34632.7	50500	45221.3	33936	38670.3	12589	28072.3	30026	36594	28281	31729.7
RuvB-like 2 OS=Homo sapiens OX=9606 GN=RUVBL2 PE=1 SV=3	5.34	51327.8	8895.33	Q9Y230	27	63.07	0	RUVB2_HUMAN	58259.7	54286.3	55457.3	55204.7	60747.7	54805.3	53649.7	59385.7	53180	64445.3	57820.3	64088.7	63670.7	65232.3	59005.3	27573.7	25695	22353.7	22310.3	27621.7	25665.7	48569.3	50496	48022.3	44247	41459.7	42568.3	52836.3	51970.3	53117.7	56585	60740	65448.7	57885.7	56185	52059.7	41216	40213.7	42319.7	18782	17787.3
NAD(P)H-hydrate epimerase OS=Homo sapiens OX=9606 GN=NAXE PE=1 SV=2	7.63	32016.8	8815.16	Q8NCW5	9	32.99	0	NNRE_HUMAN	46419	61564.3	61557.7	41048.3	43498.3	49256	43933.7	45923.3	53123.3	54480.3	60541.3	55876.3	66180.7	59436	67933	71930.3	76979.3	83026	58318.3	61152.7	66160.3	43588	43642.3	39087.7	38206.3	35984.7	36544	40554.3	42459.3	23040	46004	63148.3	42330.7	39125.3	29978.3	27416.7	38408.5	27848.3	31108	12391.5	13676.5
Histone H1.3 OS=Homo sapiens OX=9606 GN=H1-3 PE=1 SV=2	11.78	22349.9	8803.78	P16402	6	26.7	0	H13_HUMAN	59688.8	63409.2	60397.6	88882.7	86813	88943.7	81330.2	84324.4	92978.8	63849.1	71816.4	61987.1	64289.9	66017.6	71468.7	75659.6	70325.7	76216.1	114615	124071	126314	34114.2	38221.6	39632.3	34353.7	29144	32864	64484.3	63991.1	63986.7	117114	76299.2	75883.7	87614.7	58463.8	110582	78827.8	74017.4	67991.9	145139	126206
Calbindin OS=Homo sapiens OX=9606 GN=CALB1 PE=1 SV=2	4.51	30310.3	8777.84	P05937	16	67.82	0	CALB1_HUMAN	96605.7	68983.7	96476.7	95308	86608.1	96649	98283.2	91430.1	95024.6	99223.8	118938	114203	103742	96127.8	102252	106469	104616	109475	112115	124095	122570	86504.6	84138.6	84101.1	78516.6	68289.3	66824	84697.4	98993.7	74565.8	89840.9	110429	97046	89686.3	70381.3	83737.3	64859.7	62304.3	56418.7	68248.7	62108.3
Heat shock protein 75 kDa_ mitochondrial OS=Homo sapiens OX=9606 GN=TRAP1 PE=1 SV=3	8.31	80395.3	8777.02	Q12931	40	60.23	0	TRAP1_HUMAN		4136		39086.3	33117.7	43071	44766	40416.3	48823.3	23480.7	27699.7	24954.3	3971.5	4358.5	7089.33			4111	8110.5		9702	66607.7	71379.3	67299	57119.7	59635	56556.3	68886	66859	57966.7	49359.7	48236.3	43661.7	12837	12867.3	8633.67	10708	11091	11215.3	9112.67	10235.3
Ras-related protein Rab-10 OS=Homo sapiens OX=9606 GN=RAB10 PE=1 SV=1	8.58	22769.1	8771.87	P61026	8	38.5	0	RAB10_HUMAN	7360.33	18149	11843	9631.76	9458	10676	14692.3	14733	14663	13827.7	13277	11003.3	12986	14388.7	24210	11302	10799.5	8591.67	10321	15183	8700.67	21475.8	21650.1	19384.7	24278.9	24926.4	21670.9	18192.6	18071.2	12617.3	19527.7	24130.7	23129.7	17817	16452	17192.7	3806.33	11372.7	8713.67
Superoxide dismutase [Mn]_ mitochondrial OS=Homo sapiens OX=9606 GN=SOD2 PE=1 SV=3	8.41	24921.3	8737.27	P04179	13	71.62	0	SODM_HUMAN	28853	27180.3	26726	16483	15582.3	17077.3	15669	15431	16442.7	20075	22320.3	20126.3	26281	26527.3	29480	34122	35914	27636.7	40130	42681.3	52052	35007.3	35474.7	36894	35047.3	31222.7	30575.7	37627.3	38280	39311.7	62983.7	47603.3	51623.7	60395.3	63018.7	64581.3	70141.3	69639	67856.7	90095.7	83286.3
Small nuclear ribonucleoprotein E OS=Homo sapiens OX=9606 GN=SNRPE PE=1 SV=1	9.87	10860.7	8713.07	P62304	3	38.04	0	RUXE_HUMAN	35102	34195.5	36033.5	36118	25834	31693	25908.5	24786.5	21742	39132	34597	45698.5	29083	26394	29529.5	41980.5	38219	38620.5	35287.5	33059.5	34949	87607.5	78840	89288.5	70563	47956.5	33807	77620	70527	29320.5	82995	97177.5	108312	100072	51561	46837.5	21909.5	30504	41542	17642	32748
Leucine-rich PPR motif-containing protein_ mitochondrial OS=Homo sapiens OX=9606 GN=LRPPRC PE=1 SV=3	5.75	159103	8701.48	P42704	73	52.87	0	LPPRC_HUMAN	22036.7	48385	27667.5	40833.7	40470	49042.7	23956.7	22700.3	29710.7	25327.7	37043.7	18892	20089.7	25500.7	34176.7	6524.5	24652.7	36922	24565.7	30635.7	47254.3	61515	63361.3	68248.3	57970.3	64359	50233.7	29728.7	30679.3	28817.7	23783	24691.3	29405.3	32661.3	28389.7	28193.3	36127	35946	37532.7	48435.7	48935.3
Beta-enolase OS=Homo sapiens OX=9606 GN=ENO3 PE=1 SV=5	7.67	47329.1	8701.46	P13929	11	34.56	0	ENOB_HUMAN	36906.2	44782.1	47174.3	44271.1	47604.4	45146	36093.4	44413.1	44137.2	56740.8	52710.9	59167.7	22911.5	30660.1	18590.4	25940.6	30345.3	33896.9	15121	19809.9	18962	54614.7	54326.8	46557.3	36512.1	46018.6	44600.2	44867.3	54549.7	44078.5	45372.5	59524.9	47054.8	31932.4	34231.4	29990.2	52461.5	42533.5	39172	22545.3	14719.3
Brain acid soluble protein 1 OS=Homo sapiens OX=9606 GN=BASP1 PE=1 SV=2	4.42	22693.4	8630.09	P80723	13	65.64	0	BASP1_HUMAN	38148.3	34860.7	37342.7	31253	30265	58694.7	31864	31803.3	60603.3	34003	63476.7	33816	43949.3	45641.7	85284.3	56924.7	53211	84969.3	67495	73805.7	108956	94066	83695	83030	88019	59748	71626	99155.7	115496	95636	105038	126788	113110	120926	131403	119793	124714	127147	141101	125873	147040
Chromobox protein homolog 3 OS=Homo sapiens OX=9606 GN=CBX3 PE=1 SV=4	5.04	20982.5	8627.68	Q13185	7	35.52	0	CBX3_HUMAN	28661	25106.7	26462	35864.9	35070.1	41531.5	39811	31197.2	39376.1	29868.8	36877.4	27323	33199.7	30991.7	33780.7	28636	26628.3	37521.7	29953.7	31680.7	43320.3	40059.7	41020.7	34906.7	36044	34996	34729	58536.3	55249	51980	58500	59151	53856.7	60055.3	40802.7	71954.7	74928.3	73767.7	71631.3	79478	77777.3
RuvB-like 1 OS=Homo sapiens OX=9606 GN=RUVBL1 PE=1 SV=1	6.02	50570.3	8624.03	Q9Y265	17	48.25	0	RUVB1_HUMAN	55107.3	52678	54233.3	53533	50237.7	54164	51615.7	55517	57049	58254	61547.7	63654.7	64990.3	62351.7	66067.7	22111.3	23245.3	21663.7	15646.3	15530.3	15761	64405	69412.7	55877.3	54577.3	59213	58454.7	67098.3	63687.7	64106.3	66948.7	79073.7	71932.3	74749.7	63896.7	54472	54654	44864	61132	19446	15720.3
Transcription intermediary factor 1-beta OS=Homo sapiens OX=9606 GN=TRIM28 PE=1 SV=5	5.43	90317.6	8611.43	Q13263	25	44.79	0	TIF1B_HUMAN	37441.3	33227.3	33771.3	65606.7	70233.3	75281	50734.7	54734	61640.7	37309.3	45063.7	38449.3	27270	29058.3	36263.7	34471.3	29280	38477	37575	39949.7	48788	78748.3	74579.3	66220	48157.3	52008	53577.3	69597	74670	63993.3	57288	64371.3	59040	59208	57644	42825.3	53242	52266.7	52647.7	43703.7	47676.7
Alpha-aminoadipic semialdehyde dehydrogenase OS=Homo sapiens OX=9606 GN=ALDH7A1 PE=1 SV=5	7.94	59057.5	8591.5	P49419	26	52.69	0	AL7A1_HUMAN	77070	79959.3	75382.7	83854	78893.3	83647.3	93590	91619	100982	93931	103368	91521.7	78977	78511.3	85671	55634	55547.3	69537.7	59605.3	87678	77239	69800	66935	66939	60060.3	53139.3	49610.7	57962.7	55455	57390.3	57476.7	56073	57041	41920	42621.7	35396.7	41557	39460	39279	39502.3	41955.3
60S ribosomal protein L17 OS=Homo sapiens OX=9606 GN=RPL17 PE=1 SV=3	10.85	21625.2	8588.38	P18621	5	26.63	0	RL17_HUMAN	10327.3	8570	9196.33	29747	32570	32240.3	19481.3	24402.3	26526	19506.3	20378	16866.7	15993	17507.7	18109.3	8060	7007	9106.67	13204.7	17253.3	17879.7	4277.67	5621	6534	6058.33	5180.33	6358.67	7678.33	7842.33	8814	9028	9836	6537.5	5825.5	7160.5	8457	4314	4845	7800		5203.5
Delta(3_5)-Delta(2_4)-dienoyl-CoA isomerase_ mitochondrial OS=Homo sapiens OX=9606 GN=ECH1 PE=1 SV=2	8	36158.4	8527.71	Q13011	17	67.68	0	ECH1_HUMAN	14114	12916.7	14165.3	42092.7	44919	40774.7	33290.7	34707.3	32921	41255.3	44887.7	42358	10505	11926.3	11888.3	8106.33	9047.67	7201.33	9767.5	8103.67	6991	67869.7	70141.7	59850.3	68145	71507	70097.3	65830.3	62030.7	56628.7	82886.7	81276.3	67587	38522	39881	32781.7	14165.7	15771.3	15990.7	12066.3	15173
Ubiquitin-conjugating enzyme E2 variant 1 OS=Homo sapiens OX=9606 GN=UBE2V1 PE=1 SV=2	8.18	16609.1	8499.58	Q13404	9	55.78	0	UB2V1_HUMAN	28210.2	25168.1	25071.1	20235.1	22589.8	23666.1	14981.9	16743.7	14287.8	28713.6	28418.2	30832.6	19609.3	19875.1	26274.5	18584.2	15123.3	14373.5	11462.9	15204.7	24183.3	26453.7	26073.3	26515.2	22668.5	22950.8	23318.7	32238.9	32448.6	30738.3	60510.2	40555.6	39306.5	36262.1	38775.4	44041.6	33126.1	30061.1	33597.8	23533.4	25017.4
NHP2-like protein 1 OS=Homo sapiens OX=9606 GN=SNU13 PE=1 SV=3	8.62	14401.7	8499.58	P55769	5	32.03	0	NH2L1_HUMAN	13889.5	24797.5	26028	15334.7	14262	17152	14364.3	13912.3	16733.3	26218.5	23343.7	27656.5	27267.5	25355.5	21401.3	17300.5	17474	15097.3	16171.5	15432.5	10835	43669	44996.3	40898	29333	28781.7	30122.7	49333.7	46925	42237.3	79360.7	58657.7	54452.3	59374.3	71561.7	71214.7	56070.7	64168.7	65604.7	34831.3	39959.3
Aldo-keto reductase family 1 member B1 OS=Homo sapiens OX=9606 GN=AKR1B1 PE=1 SV=3	6.59	36252.6	8498.56	P15121	14	51.27	0	ALDR_HUMAN	31121	31163.3	29494	52295.7	56023.3	52998	46282.2	52568.7	50605.4	73583	70386.7	63255.3	24607	25392	24821.3	4458	4275		4774.5	5072	6672	35292	37015.3	40370.3	41368.7	32224.3	34903.7	44048	43962	48823	63465.3	50953	54723.7	43710.3	40458.7	41856	12422.7	9164.67	11318.3	8284	8995
Deoxyuridine 5'-triphosphate nucleotidohydrolase_ mitochondrial OS=Homo sapiens OX=9606 GN=DUT PE=1 SV=4	9.73	26848.4	8482.21	P33316	7	34.92	0	DUT_HUMAN	5740	5232	6841.33	12853	13060.3	14298	11427	12700.3	12884.3	12132.7	12285.3	10671.3	9350	8804.67	9289.67	4297	8294	10021.7	5755	9664.67	9757.33	20610.3	17327.7	12436.3	20825.3	20816.3	20661.7	11966.3	13155.7	8508	11230.3	19366.3	10963.7	8608	4177	3472	5400	2890	4753	4522	12774
Reticulocalbin-2 OS=Homo sapiens OX=9606 GN=RCN2 PE=1 SV=1	4.06	36933.5	8452.1	Q14257	14	50.47	0	RCN2_HUMAN	21163.3	19865.7	21771	18529	19893.7	22947.7	16098	17503	20873	23515.3	26717	22527	30088	31268.7	31844	22917.7	22913.3	25538	28467.3	29923.3	31592	25583	23411	26388.3	30230.3	27065.3	27287	19206.7	17825.3	22685.7	22998	22705.7	29159	31605	27081.7	23405.7	29381.3	23675	26902.7	34189.3	29400.7
60S ribosomal protein L11 OS=Homo sapiens OX=9606 GN=RPL11 PE=1 SV=2	10.13	20480.5	8400.32	P62913	7	37.08	0	RL11_HUMAN	23916.5	19772	19851	41965	43071	46742.7	27657	27314.7	29838.7	26134	22778	18907	14670.3	14216.7	17560.7	12109	10646	12036.5	21351.5	20519.5	22438	54613	57998.7	53357	38904.3	41767	42508	30872.7	28737.3	25329.3	24837.7	22937.3	21997.7	22539.3	22923.7	14555.7	14654.7	14777.7	13610.3	11575	9369.33
26S proteasome regulatory subunit 7 OS=Homo sapiens OX=9606 GN=PSMC2 PE=1 SV=3	5.59	49033.1	8397.85	P35998	27	57.74	0	PRS7_HUMAN	7493	7589	8450	44080.3	39964.7	52682.7	38106.7	34602	46443.7	17082.3	18678.7	19383.7	27651	26001.7	28192.3	7763	7629.33	7810.67	9516.33	8458	9142.67	28676	27565.7	31670.3	25541.7	22005.3	22351.7	24383	25937	28583	19512.7	17968.3	26353	14993.7	14929.3	15328.7	13534	12262	13278.3	6204	8423.33
Sorcin OS=Homo sapiens OX=9606 GN=SRI PE=1 SV=1	5.17	21961.6	8387.49	P30626	9	38.89	0	SORCN_HUMAN	41241.3	38800.3	41150.7	44806.3	44726	49115	44448.3	43907	48813.7	55120.7	55199	56193.3	40751	39734	43000.3	17616.7	17607.3	18475.3	16374	17016.3	18712.3	38207.7	37438.7	38109	34133.3	32035.3	31948.3	41695.3	42810.7	41688.7	51062.7	46853	46821.3	46728.7	51511.3	46887	32825.3	33858	34504	20649.3	22145.7
Putative nascent polypeptide-associated complex subunit alpha-like protein OS=Homo sapiens OX=9606 GN=NACA4P PE=5 SV=1	4.33	23306.1	8381.04	Q9BZK3	3	19.72	0	NACP4_HUMAN	4794.53	9008.55	8849.76	8106.28	12829.4	7434.85	5679.36	12143.6	12262.5				14067.6	13644.9	15516.7	9477.25	8458.69	11470.3	10469.6	11024.6	13522.7	9665.38	5930.6	7681.22	6940.54	5047.01	11182.6	5568.26	8997.77	2779.99	7511.55	5467.17	6629.18	8171.69	6937.45	6176.17					4826
3-ketoacyl-CoA thiolase_ mitochondrial OS=Homo sapiens OX=9606 GN=ACAA2 PE=1 SV=2	8.08	42380.4	8375.2	P42765	18	61.21	0	THIM_HUMAN	48329.7	42900.3	45701	22917	22359	19779.7	20982.3	21255.7	19157.7	28580.7	26590	28966.3	35668.3	36269.7	42363.7	57863	54674	62162	41695.3	42278.3	49001.3	42101.3	40161.7	39565.3	42433	38479	43434	45177.3	45401.3	44825	66487	61277.7	58439.7	74010	76400	76473.7	83471	81987.7	92405.7	67563.7	69017.3
DNA-directed RNA polymerases I_ II_ and III subunit RPABC1 OS=Homo sapiens OX=9606 GN=POLR2E PE=1 SV=4	5.61	24665.3	8363.28	P19388	7	31.9	0	RPAB1_HUMAN		4779	4624	12427.7	12101.3	12430.3	9365.67	9677.33	8928.33	6386.67	7276	7866	2835		3758.5		4309	3950.67	8171		3690	21089	21236.3	20003.3	10881.7	11596	11777.3	16723.3	22676.7	16152.3	14211.7	15398.3	13869	13467.7	12891	18154.7	14125.3	8429.67	17040.3	6898.67	10725.7
Asparagine synthetase [glutamine-hydrolyzing] OS=Homo sapiens OX=9606 GN=ASNS PE=1 SV=4	6.43	64940.3	8353.76	P08243	24	48.31	0	ASNS_HUMAN	4400			38212.7	39516	43661.7	38381.7	41412.3	44638.7	26983.7	30240	28102.3	3175	2703.33	4106.67	4303	4570	6426	5931		4375	44619.7	46882.7	43115.3	38753.3	30868.7	30952.3	36553	41103.3	30412	25485	31694	24791.3	11046.7	9584	7712.33	16720	22940.7	11990	6017	6876
Serine/threonine-protein phosphatase 2A 65 kDa regulatory subunit A alpha isoform OS=Homo sapiens OX=9606 GN=PPP2R1A PE=1 SV=4	4.82	66107.1	8337.85	P30153	22	42.95	0	2AAA_HUMAN	15290.7	21065.3	23738.3	77724	79735.7	66897.3	80367	81993.7	82290.3	88578.7	76431	91350	25331	25265.7	20229	8282	9793	10022.3	12149.3	12798.7	12616	79478.7	80727	71919.3	69711	52379	60722.3	76082	65123.7	63186.7	72848.7	79865	70307.7	34211.3	28613.7	28563.3	19764.7	19166.7	18977	13835.3	15380
Actin-related protein 2/3 complex subunit 4 OS=Homo sapiens OX=9606 GN=ARPC4 PE=1 SV=3	8.78	19781.1	8300.41	P59998	9	63.69	0	ARPC4_HUMAN	55021.7	55049	54217	38478.7	38180.7	43369.7	42324	42895.7	43041.7	51418.3	55146	57315.3	50229.3	52213.3	49778	29042.7	27307.3	28801.3	12101.3	12704.7	13376.7	38888.3	40932.7	43403	38702	33913.3	34880.3	48972	48273.7	51680.7	47724.7	45122.7	52391.7	57024.7	44469	43995	58966.7	48952	66341.3	6091.5	5424.67
Exportin-2 OS=Homo sapiens OX=9606 GN=CSE1L PE=1 SV=3	5.42	111215	8270.7	P55060	43	46.76	0	XPO2_HUMAN	5014.67	5475	6047.67	53366.7	54045.3	60281.7	53461.7	60044	76078.7	28359.3	36732	29611.3	11153	18014	29714.7	3677	8959	10036.3	4649.33	9435.33	9830.67	43907	44373.7	47964.3	46664	43126	42238.7	47318.7	43744	47382.7	21913.3	27165	26861	12858.3	11695.3	15468.3	11911.7	9998.67	11078	9390	8956
Polyadenylate-binding protein 1 OS=Homo sapiens OX=9606 GN=PABPC1 PE=1 SV=2	9.98	70899.1	8267.5	P11940	27	47.33	0	PABP1_HUMAN				28259.6	27926.4	37665.8	22927	24214.6	27980.2	13667	18865.7	15229.8	6131.35	5710.28	7727.31				4238.69	3867.14	4979.89	28133.2	28793.7	30383.7	21828.6	22953.8	24104.7	38331.7	37478.4	38986.2	26043.3	25357.3	25641.7	15308.7	16384.7	12623.3	6661.33	6886.67	7467.28	4526.71	5250.56
Alpha-endosulfine OS=Homo sapiens OX=9606 GN=ENSA PE=1 SV=1	7.54	13389	8259.31	O43768	7	53.72	0	ENSA_HUMAN	6776	5186	6683	3926	4200.67	3572	4518	5470.5	4805	4599.15	5363.67	5842	5517	4510.67	4825	2438.42	2363.94	3302.51	4696.99	5525.12	6577.92	7105.33	6809.33	7225.33	5646.5	4576.67	4473.33	7382	6889.67	8610.67	9559.38	8513.47	10150.6	12275.6	10901	10166.3	10733	9402	11782.7	9032.33	11692.3
Peptidyl-prolyl cis-trans isomerase NIMA-interacting 4 OS=Homo sapiens OX=9606 GN=PIN4 PE=1 SV=1	10.48	13867	8245.51	Q9Y237	5	53.44	0	PIN4_HUMAN	12301	10457.5	12607.5	14260.3	15515.3	18528	12115.7	12381	16509.7	11952	13985.3	12547	11616	12114.5	14844	9426.5	9222	6547	14581	9362.5	10989.7	11782	11635	12422	12656	7915.33	10749.5	14476	16749.3	21487	16926.7	16534	18714	19945.3	24444.5	22317.5	14696	18238.5	14953.7	15079	14863.7
Tumor protein D54 OS=Homo sapiens OX=9606 GN=TPD52L2 PE=1 SV=2	5.08	22294.8	8243.11	O43399	14	68.93	0	TPD54_HUMAN	59162	62054	56425.3	28976.3	29121.7	28258.3	33914.7	32167.7	35371.3	42797.3	44848.7	41001.3	55175	56169	59427.7	59881.7	60017.3	62559.7	66905.3	70561.7	78881	11502.3	12062.3	11514.3	8748.33	7734	5390.67	16128	14314.3	16263.7	16119.7	18002	17757.7	23092.3	23769.3	16960	33931	36068	39427.7	34330	39532.3
Staphylococcal nuclease domain-containing protein 1 OS=Homo sapiens OX=9606 GN=SND1 PE=1 SV=1	6.78	102681	8233.83	Q7KZF4	42	50.11	0	SND1_HUMAN		12211	7572	35907.3	35158	39139	14712	15468	16626.7	7114.33	9597.33	6639	5027	6939.33	9456.33		11015	7021.33		15986	10177.7	48548.7	49480.7	42919.3	40779.7	42852.7	42401.3	15847.7	16392.7	15446	10849.7	8940	9335	10008.3	9329.33	4230	9474.67	12291.3	10391.3	10357.3	8093.67
60S acidic ribosomal protein P0 OS=Homo sapiens OX=9606 GN=RPLP0 PE=1 SV=1	5.62	34444.7	8230.76	P05388	16	51.1	0	RLA0_HUMAN	43635	39101.7	42566.7	36131.3	37287.3	43025	36927	39721.3	45631.3	40754	49292	44875.7	42008.3	41847.3	52573.7	31589	29999.3	37506.3	36124	36736	39394	25219	24313	25299	25879	21206.7	20457	37388	37441.7	32763.7	38920.7	48738.3	41243	44600.7	47927	42748	42083.3	47099.3	48131.7	26879.3	30050
Transcription factor BTF3 OS=Homo sapiens OX=9606 GN=BTF3 PE=1 SV=1	10.16	22225	8214.06	P20290	10	58.25	0	BTF3_HUMAN	5740	11829	14817.7	20293.7	19165.7	24013.3	17298.3	17962.7	27609.5	21194.3	22921.3	19436	19611.7	20871	31899	13344.7	20323.3	20952	17360	25480.3	24695.3	7502	6373.67	19617	32318.3	37555.7	37784	4165.67	11372.3		14771	33485	16646	7569.5	2457		10210	11529	7765		9868
U6 snRNA-associated Sm-like protein LSm3 OS=Homo sapiens OX=9606 GN=LSM3 PE=1 SV=2	4.38	11845.4	8213.33	P62310	3	25.49	0	LSM3_HUMAN	45474.5	44190	42506	21522.5	24202.5	20168.7	20936	21940.5	21824	34099	26539	32803.5	37268	38051	26905.5	60098	53100.5	43062	58750.5	61764	46923.3	34145.5	29400.7	30760.3	23323	21860	28042	36677.7	36158.7	41723.7	37732.7	51528.5	59988.5	56191.7	49489	39514	56178.7	51768.3	67247.7	60174.3	61103.7
Elongin-C OS=Homo sapiens OX=9606 GN=ELOC PE=1 SV=1	4.54	12644.3	8213.23	Q15369	4	37.5	0	ELOC_HUMAN				14657.5	21119	27338.7	10210	17961	26444.7	22837	29599.7	21281	7095	7649	14906.3	3880		5550			4960	11961.3	11673.3	8975.67	9281	9011.33	7286.5	6310	9008	30333	3625.67	9774.33	28543.7	7863	7293		11650.5	18027	16323
Biliverdin reductase A OS=Homo sapiens OX=9606 GN=BLVRA PE=1 SV=2	6.05	33713.7	8161.78	P53004	16	45.95	0	BIEA_HUMAN	14733	14828.7	14293.3	37687	42505	43244.3	39172.7	42210.7	45184.7	43090	47318.7	46762.7	13571.7	13880.7	13784.7	4657.5	11063.3	7202.67	4515.67	10299.7	9799	32987.3	32654.7	30647.7	26906.7	26389.3	26955.7	37179.7	38175.3	31395.3	41085	34476	33120.3	17070	13798.7	12401	12227	7078	9044	7199	8691
14-3-3 protein sigma OS=Homo sapiens OX=9606 GN=SFN PE=1 SV=1	4.48	27888.2	8160.53	P31947	10	38.31	0	1433S_HUMAN	12396.7	11042	11068.8	6523.25	6814.98	6122.57	7425.17	5503.63	5522.31	10320	8412.54	10028.3	10758.9	16534.3	9016.85	15289.4	13217.7	11783.6	16507	14554.5	14490.3	4062.51	4493.55	3640.87	3870.32	3696.67	4055.33	4427.15	4705.99	2701.23	5923.7	5403.11	4854.33	6613.09	8184.57	3763.33	9002.19	8878.53	9913.56	9678.16	10983.3
Glutamine amidotransferase-like class 1 domain-containing protein 3A_ mitochondrial OS=Homo sapiens OX=9606 GN=GATD3A PE=1 SV=1	8.29	28512.6	8155.05	P0DPI2	8	40.3	0	GAL3A_HUMAN	44341.7	43333.7	45210.3	32788.7	32637.3	41363	31401	31954.7	41406.3	42667.3	53537.3	42749	63659.7	63179	72381.3	64518	63116.7	68456	65858.7	83678.3	83912.3	55273.7	51533.3	51724	47506.3	40988	42341	55977	55280.3	55273	64519.3	75308	67637.7	84376.3	89921.7	76295	98531	96112.7	96233.7	104555	99212
Vinculin OS=Homo sapiens OX=9606 GN=VCL PE=1 SV=4	5.35	124370	8133.44	P18206	66	62.52	0	VINC_HUMAN	107431	94937.7	95234.3	64547.7	59382	71957.3	66998.7	66101.3	71208	84098.7	93784	85810.3	102873	101076	107189	106549	99469	102218	75498	80589	81167.3	50677.7	53972	54370	50909.3	41702.7	52377.3	60783	63469.3	59008	65731	74353	83934.3	72065	82811.7	75492	100786	110115	106678	69013.3	78672.7
Protein CutA OS=Homo sapiens OX=9606 GN=CUTA PE=1 SV=2	5.26	19230.4	8111.38	O60888	5	40.78	0	CUTA_HUMAN	49402	57204	61829	13014.7	11683	18614.7	14729.7	12118	18914	21357.5	28544	19446.7	24275	19880	26346.5	96574	79996	50683	100101	98407	54515	27985.7	28558.7	26180	27016	29224	19008.7	47122.5	44387	17162	42806.5	45561.5	25353	24213.7			10511	8768	16056.5	15976	12727
Poly(rC)-binding protein 3 OS=Homo sapiens OX=9606 GN=PCBP3 PE=2 SV=2	8.12	39750.5	8080.98	P57721	5	17.52	0	PCBP3_HUMAN																									10170.9	11753	11894.8
Eukaryotic translation initiation factor 2 subunit 1 OS=Homo sapiens OX=9606 GN=EIF2S1 PE=1 SV=3	4.82	36397.4	8071.42	P05198	19	57.46	0	IF2A_HUMAN	14861.7	15308.3	15329	63435.7	58286.7	64101.3	59589.7	57029.7	64901.3	54135	60483.3	57426.7	15865.7	15023	22100.3	6562	6566.33	9584	9358.67	9528	12621.7	54507.7	55052.3	44795.3	40261.3	42226	43245.7	56784	57464	43540	51879.7	54185.7	43907.3	31389.3	41031.7	38841.7	14700	17753.7	18190.7	8719	11232.7
Obg-like ATPase 1 OS=Homo sapiens OX=9606 GN=OLA1 PE=1 SV=2	7.85	44971.7	8031.2	Q9NTK5	21	56.31	0	OLA1_HUMAN	5732	6834	5848	48229.3	50695.3	62671.7	47902.3	51955.7	60925.3	16275.3	19569.7	18186.3	7291	6141.67	6514.33	9073	8807	5023.33	4664	4789.67	6146.33	45966.7	46145	45355.7	44740.3	44214	42288.3	41817.3	49473	42644.7	14044.7	17635.3	14470.3	9525.33	8551	8905.67	10793.3	8782	10067	5772.5	6634
40S ribosomal protein S13 OS=Homo sapiens OX=9606 GN=RPS13 PE=1 SV=2	11.18	17222.3	8024.12	P62277	10	55.63	0	RS13_HUMAN	7028.67	6727.67	7021.67	13836.7	12501.3	14455.7	6849.5	8290	6926.5	9145	8610.33	9866	5118	5299	4157	3913	4298	5603	8592	9368.67	8192	1384	2285			2473	1758		4702			3073		3664
40S ribosomal protein S4_ X isoform OS=Homo sapiens OX=9606 GN=RPS4X PE=1 SV=2	10.84	29825.9	8020.79	P62701	16	51.71	0	RS4X_HUMAN	12870.3	12472.7	11064	24491	25486.3	30448.3	22985	24235.7	25250	15267	17456	16314.3	10897.3	11613.7	10789	7720	6738.67	6359.33	15375	15387.7	12729.3	5739.67	5448.33	6954.33	5982.33	4652.33	4427	8595	7078.67	8374.67	5167	4444	5548	6147	5087	5546.5	5677	4602.5	4563	5061.5
UV excision repair protein RAD23 homolog B OS=Homo sapiens OX=9606 GN=RAD23B PE=1 SV=1	4.58	43228.3	8006.79	P54727	18	66.75	0	RD23B_HUMAN	57757.2	53998.5	58198.9	34263.3	34521.2	42105.1	38378.7	36786.6	44804.3	44053.3	56342.3	45127.9	69239.3	67555.2	74574	77948.8	68958.9	81484.3	77104.3	83170.8	90579.2	41561.8	42748.2	41239.2	37572.5	36489.3	38378.3	45815	46508	49663.2	92686.3	58066.6	62926.1	78083.1	71997.7	70528	82773	79657.9	83173.3	96379.7	94168.7
Peptidyl-prolyl cis-trans isomerase F_ mitochondrial OS=Homo sapiens OX=9606 GN=PPIF PE=1 SV=1	9.94	22382.4	7999.24	P30405	7	34.78	0	PPIF_HUMAN	5876	3077.45	1474.88	13163.4	15366	18140.4	11364.3	12492.6	15451.2	12340.6	15818.4	10800.3	3952.76	3125.19	5285.07	764.578	223.961	2489.02				21683.1	19875.4	23492.8	29228	40014.9	38269.4	18976.2	17991.6	16987.7	23832.3	24986	20904.4	10712.1	10089.9	12258.4	9817.65	6752.54	8045.12	12068	6644.9
Aspartate--tRNA ligase_ cytoplasmic OS=Homo sapiens OX=9606 GN=DARS PE=1 SV=2	6.13	57535.5	7983.09	P14868	34	67.47	0	SYDC_HUMAN	16410	14688	10920.7	67977.3	66534	66924	47467	47278.7	47997.3	32436.7	33283.3	31462.7	15865	16642.7	15895	16782	9890.67	11267.7	16351.5	14238.7	15232.7	56325.3	58474	48567.7	37531	38901	45056.3	18641.3	18290	17419	10749.3	12748.7	12032.3	11616.7	12112.3	10758.3	8299.67	9454.33	8537.33	6229.67	5816.33
Thioredoxin domain-containing protein 12 OS=Homo sapiens OX=9606 GN=TXNDC12 PE=1 SV=1	5.11	19376.9	7967.66	O95881	9	66.28	0	TXD12_HUMAN	24227	21479.3	20667.3	19133.7	17705.3	21382.3	21578.7	20078	21379.3	20930.3	20704	22774.3	24159	21720.7	22063	24127	22312	21293.3	27920.3	27120.3	24455	33656	27779	33248	30216.3	26578.7	26351.7	34286.3	39597.3	36865.3	48396.3	36595	42813.7	41622.7	35642.3	35947.7	37397.3	38430.7	42565.3	33471	29478.7
Lamin-B1 OS=Homo sapiens OX=9606 GN=LMNB1 PE=1 SV=2	4.92	66693.6	7954.48	P20700	37	62.12	0	LMNB1_HUMAN	60328.4	59142.8	56748.8	50183	47906.9	49320.7	44234	43871.3	45785.7	62544.6	56994.3	64318.2	73722.9	70017.3	60420.3	72317.4	67142.2	69343	83055.1	80317	81767.3	14872	15930.3	13306.7	15236.3	14647	15024.3	39403	49344	33947.7	86433.3	83342	80237	81702.7	92651.3	86128.7	66639.7	67847.3	80958.7	49147	54316.7
Proteasome subunit alpha type-4 OS=Homo sapiens OX=9606 GN=PSMA4 PE=1 SV=1	7.72	29769	7950.59	P25789	9	27.97	0	PSA4_HUMAN	66384	70720	69271.3	42413.7	46217.7	34066.7	47121.3	47693.3	32510.3	56007.3	49111.3	60004	59938.3	58706.7	59305.7	80248.3	79081.7	64053	88132	100175	90060.3	36277	37575	37138.3	39349.3	34329.7	34973.7	42053.7	41719.3	45354.7	52279.3	46697	58217.7	64958.7	37524.3	39224.3	38713.3	45824	37593.3	76474.7	76233.3
Keratin_ type I cuticular Ha1 OS=Homo sapiens OX=9606 GN=KRT31 PE=1 SV=3	4.64	48662.8	7912.02	Q15323	17	34.86	0	K1H1_HUMAN	5172	6754	4291.12	3526.23	3119.93	5467.07	3699.72	4612.65	6869.67	2835	6194	3937.71	6896	7221.23	10546	27990.7	28562.4	8399.67	4270.99	6437.83	8634.33	3360	2908.67	2834	1701.35	3571.67	2750.3	3117	3973.24	2909.24	6383	4454	3636.19	5486.92	5473.33	5267.5	2882.56	3322.54	3129.9	4333.73	4709.5
Electron transfer flavoprotein subunit beta OS=Homo sapiens OX=9606 GN=ETFB PE=1 SV=3	8.25	28071.8	7899.91	P38117	14	50.98	0	ETFB_HUMAN	31359	36120.7	35696.3	52852	52088	49051	52296.7	52763.3	47074.3	57718	54542.3	62216	38479.3	35372.3	34028.3	4590.67	4897.67	7367.67				58475.3	60563.7	55981	54983.7	51863	53257.7	63612.3	61833.7	60012.7	89579.7	67899.3	68057.3	55355	64132.3	68384	40247.7	41100.3	43570.7	13532.7	13008.7
Tropomyosin alpha-1 chain OS=Homo sapiens OX=9606 GN=TPM1 PE=1 SV=2	4.49	32765.6	7890.85	P09493	12	39.08	0	TPM1_HUMAN	14589.3	15222.9	15132.1	12498.4	13121.8	12000.5	12633.3	12866	11580.6	13836.9	12633.9	13858.6	14617.1	16286.7	12754.4	17252	17651.4	15827.5	23169.7	21223.7	21413	6243.73	6446.98	7789.55	5949.76	10199.6	5243.45	6590.05	7016.77	10431	378.728	9242.62	10968.8	11881.7	10964.1	510.704	11864.5	9077.97	10777.8	9297.72	11082.9
Eukaryotic translation initiation factor 1b OS=Homo sapiens OX=9606 GN=EIF1B PE=1 SV=2	7.27	12937.7	7883.78	O60739	4	42.48	0	EIF1B_HUMAN	16283	28742	21336.3	10253	12083	13709	12001.3	12218	13338.5	15990.3	17376.5	15420.3	23930.3	21393.3	25030	19428	20008.7	22714.7	22756	22612.3	28423.7	7034	6370.5	4919	3905.5	4521	3574	5854.5	9034	3807	10722.5	11965.5	9307.5	12065.5	4968	7986.33	8000.5	11899	9455
Heterogeneous nuclear ribonucleoprotein A3 OS=Homo sapiens OX=9606 GN=HNRNPA3 PE=1 SV=2	9.3	39823.1	7856.2	P51991	17	44.71	0	ROA3_HUMAN	15653.6	15107.5	14883.2	60628.7	64361.3	67098.3	38784.7	40155.3	40401.3	23394	23683.7	23755	17110.7	17663.3	19576.3	12056.2	14127	17374	21947	23826	24956.7	60782	62057.7	66063.3	57327	54289.7	52465.7	58646	63845	59388	58040.3	51228.7	54981.3	44237	38898	37558.3	34112.7	31470.3	32404.7	36217	37693
Splicing factor_ proline- and glutamine-rich OS=Homo sapiens OX=9606 GN=SFPQ PE=1 SV=2	9.95	76263.6	7855.09	P23246	29	40.03	0	SFPQ_HUMAN	14827	13655.7	14043.3	43185	40152.3	50692	42698	38391.3	51673.3	22493.7	32897	23870	16994.9	16062.1	25529.3	9802.67	10490	10630	14561	14547.3	13784	110087	110149	108690	93634.7	91612	93775.3	115734	115914	106568	99934.9	105432	101775	79594	82840.3	78010	60384.3	56251.3	57878.7	29318.3	25437.9
Hsp90 co-chaperone Cdc37 OS=Homo sapiens OX=9606 GN=CDC37 PE=1 SV=1	4.99	44981.6	7845.5	Q16543	20	44.97	0	CDC37_HUMAN	36376.3	35145.3	37896	43586	51804.3	56463.3	59632	59056.3	69567.3	56809	67318	60399	46270.3	47257.7	52616.7	27385.7	25239.3	28461.3	24116	23360.7	28072.3	63891	43379.7	55731.7	37494.7	42197	31997.7	61038.3	62011.3	58299.3	51454.7	69073	66192	58574	61578.7	45447.7	50598	35500.3	52785.7	31146.7	30098.3
26S proteasome non-ATPase regulatory subunit 3 OS=Homo sapiens OX=9606 GN=PSMD3 PE=1 SV=2	8.76	61091.7	7806.91	O43242	40	65.92	0	PSMD3_HUMAN	16598.7	16075.3	15649.3	45556.3	48158	46842.7	43115.3	43124	46339	27699.7	30611	27142	18772.3	17759.3	18172	13030.3	12742.7	13065.3	16285	13614.7	15553.3	40268.7	43409.3	40741.7	36318.3	34970	35105.7	33424.7	32570	30971.7	24100	26585	24243.7	21193.3	18664.3	18416.3	14110	11640.7	13580	11929.7	10038.3
Beta-actin-like protein 2 OS=Homo sapiens OX=9606 GN=ACTBL2 PE=1 SV=2	5.26	42345.5	7798.23	Q562R1	9	24.47	0	ACTBL_HUMAN	26682.9	24799.4	22862.1	11514.7	10950.1	11832.2	21489	19690.9	20875.9	29530.9	26445.5	31463.1	19206.2	18673.2	21450.2	11091.7	9646.64	11965.3	6715.4	7013.78	8668.8	14371	15892.9	17465.7	10777.4	7690.3	7997.1	21914	22398.2	21594.8	17548.1	20767.5	24232.2	29003.2	26307.7	18480.7	15260.7	13487.1	16742.8	5561.46	2758.28
C-1-tetrahydrofolate synthase_ cytoplasmic OS=Homo sapiens OX=9606 GN=MTHFD1 PE=1 SV=3	6.94	102244	7781.46	P11586	42	51.76	0	C1TC_HUMAN	13692	12617	12965.3	76155	86011	87972.3	64442.7	75457.7	75824.3	21270	21854.3	22753	11846	12657.3	13377.3	7543.33	8568	9393.67	7186.33	7817.67	9571	71211.7	70941.7	76129	71286.3	63728.3	67181	53936.7	55925.7	60604	46110.7	42413.3	45010.7	40619	38656.3	24519.3	31076.3	34453.3	31979.7	18339	24123.3
Splicing factor 3A subunit 1 OS=Homo sapiens OX=9606 GN=SF3A1 PE=1 SV=1	4.97	88943.4	7739.42	Q15459	34	53.59	0	SF3A1_HUMAN	11874.3	10898	11997.7	42164.3	44146.3	49207.7	35721.3	36968.7	41364.7	29784.3	33067.7	30476.7	11899	12507.7	12469.7	9924	9276.33	11307	12481.3	11462	13009.3	67273.3	66660.3	62297.7	58500.7	57086	57023.3	61497.3	65725	57379.3	61498	64282.3	57104.7	31720.3	36467.7	34674	25684.7	27951.7	29739	14865.7	17193.7
Thioredoxin-like protein 1 OS=Homo sapiens OX=9606 GN=TXNL1 PE=1 SV=3	4.64	32650.6	7722.86	O43396	12	50.87	0	TXNL1_HUMAN	11827	11147	11800.7	35000	34912.7	40202	31316	31198.7	34704.3	17051.3	17783.3	15840.3	13140.7	12410	13795	9788.33	10134	11585.3	14538.3	14258.3	14748.7	29780.7	29629	30000	25587.7	26104	25740.7	31774.7	31934	28881	21197	23245.3	22153	18687.7	19637.7	16727.7	18652	19862.7	19677.7	17519.3	14874.7
Glutaredoxin-related protein 5_ mitochondrial OS=Homo sapiens OX=9606 GN=GLRX5 PE=1 SV=2	6.38	16741.9	7719.69	Q86SX6	5	24.2	0	GLRX5_HUMAN	11373.5	10998.5	12450	14742	13761.5	14665.5	14753.5	15332.5	15030.5	14461.5	17000.5	16554	14493	12884	14496	8430.5	7932.5	10078.5	8602.5	8527.5	9549.5	14595	14175.3	14101	14447.7	11524.3	11951	22434.5	22746	22850.5	17723.7	19834.7	21038.7	19258.7	17589.7	14536.7	16558.5	12914.7	14624.3	25003	23308
Eukaryotic initiation factor 4A-III OS=Homo sapiens OX=9606 GN=EIF4A3 PE=1 SV=4	6.32	47156.3	7710.81	P38919	25	58.39	0	IF4A3_HUMAN	14399.3	17332.7	15777.7	34619	32744.3	37649.3	32535.7	30824	32864	18543.3	20571.3	18960.7	12708.7	14613.3	16002.3	8710	10905.3	13049.3	10111.7	13530.7	15488.7	40589.4	42546.3	38397.7	37278.4	36662.2	37779.3	42253.8	40235.7	36736.7	30657.7	27593.5	26327.6	22909.7	25553	20367.3	20834.3	27722.3	23747.7	13066	15863.7
Probable ATP-dependent RNA helicase DDX17 OS=Homo sapiens OX=9606 GN=DDX17 PE=1 SV=2	8.25	80956.9	7681.96	Q92841	29	43.62	0	DDX17_HUMAN	5256.08	5458.02	3322.49	36972.8	42261.7	35776.3	33413.7	37525.7	32222.9	15657	14992.5	15059.3	5442.96	5133.75	5932.59	4213.81	3705.06	5245.46	7554.73	8194.62	7550.8	73166.2	74148.5	58584	49613.2	55618.9	56115.9	67176.9	67332.1	56835.4	21491.5	21324.6	19386.9	10957.8	10796.4	9453.75	10561.9	10128.7	11509.1	8740.27	10047.5
POTE ankyrin domain family member I OS=Homo sapiens OX=9606 GN=POTEI PE=3 SV=1	5.81	122936	7670.82	P0CG38	26	25.12	0	POTEI_HUMAN	7936.63	9073.13	8237.37													13239.8	17476.8	9738.09	12059.4	14586.7	8311.98
Small ubiquitin-related modifier 5 OS=Homo sapiens OX=9606 GN=SUMO1P1 PE=1 SV=2	5.2	11583.1	7665.81	G2XKQ0	5	48.51	0	SUMO5_HUMAN				3269.64	3666.91	2789.38																5027.48	6432.74	6661.81	9973.17	8895.7	8277.92	6157.76	6149	6364	3473.32	3875.39	3533.63				7314.58	5902.7	7068.25
Glutamate dehydrogenase 1_ mitochondrial OS=Homo sapiens OX=9606 GN=GLUD1 PE=1 SV=2	7.72	61740.1	7639.9	P00367	25	48.03	0	DHE3_HUMAN	49501.7	48947.3	51455.7	29885.4	30281.1	40626.1	30472	32948.5	49686.3	46141.4	60543.4	48842	51345	50084.7	70145.2	21531.7	22753.7	34053.7	10677	11363	12021.5	61807.3	62249.7	63703	57758.9	55254.3	54767.8	59423	67355	65527	71166.7	71935	69718	53747	49302.7	41941.7	35308.7	33745.3	30133.7	5351.5	5523.5
Actin-related protein 2/3 complex subunit 2 OS=Homo sapiens OX=9606 GN=ARPC2 PE=1 SV=1	7.01	34447.1	7619.15	O15144	26	79.67	0	ARPC2_HUMAN	51490	49834	55259.7	35105.3	36122	41623	38456	40088.7	41519.3	54493	55734	56218.3	52425.7	53761.3	52529	26126	26339.7	26249.3	13686.7	14241	13234	39556.7	42900.3	41031.7	45122.3	42484.3	41505	40663	42978.7	40484.3	45010.3	48342.3	50499	50891.3	48215.3	44323.3	39843.3	39858	46575.7	8149.33	8689.33
26S proteasome regulatory subunit 6A OS=Homo sapiens OX=9606 GN=PSMC3 PE=1 SV=3	4.94	49488.8	7591.59	P17980	27	65.6	0	PRS6A_HUMAN	15029.7	15019.7	14289.7	53291.7	51994.7	47733.3	47381.3	43805.7	39833.7	25173	25314.3	31143	10555.3	10514	9192	10474.7	7841.33	7714.67	11432.3	9141	8508	31887.3	33598	27466.3	27804.7	23026.3	22761.7	27882.3	26052	25582.3	18685	25390.3	22516.3	16886.3	15927.3	12987.3	11453	11443.7	11707.3	8295.67	8089.67
Small ubiquitin-related modifier 1 OS=Homo sapiens OX=9606 GN=SUMO1 PE=1 SV=1	5.22	11614	7591.16	P63165	6	81.19	0	SUMO1_HUMAN	27462.7	28151.7	29284.3	22997.6	24950.7	27306.6	21321	21523.3	22366.5	24487	19028.3	25691.3	33400.5	39273	26206	25050.5	22353	26213.5	30206.3	31560.7	30554	33487.3	37905.8	42593.7	29148.8	33789.6	31813.2	32527.2	22339.3	36562.5	37532.4	34468.3	41646.4	49917	39221.5	52361	42685.2	37825.8	41206.4	40767	47823
Activator of 90 kDa heat shock protein ATPase homolog 1 OS=Homo sapiens OX=9606 GN=AHSA1 PE=1 SV=1	5.26	38445.5	7587.93	O95433	17	61.24	0	AHSA1_HUMAN	16950	13318.3	14615.3	24093.7	27678.3	29659.3	25043.3	26579	28155	20167.3	24058.3	21740	15148.7	14326.7	14024.7	12724.7	11137.7	12439	13883	13882	14184.7	29304.7	29317	29785	26760	23448.3	24740.3	32194.7	32085.7	32909.3	32361.7	27581.3	33888	28618	31604.7	30039.7	27803.3	29795.7	23970	27854.7	31743.3
DNA replication licensing factor MCM3 OS=Homo sapiens OX=9606 GN=MCM3 PE=1 SV=3	5.41	91608.3	7565.54	P25205	43	55.07	0	MCM3_HUMAN	16398.3	12988.3	14552	42417.3	42419.3	42859.3	35645.7	37619.3	37411.3	24750.3	24444.7	26328	12816.7	13084	12241.7	11803	11663	9460.67	14084.7	12985	11788.3	37126.7	37633	36113	32544	31599.7	31816.3	69243.7	27434.7	29763.3	17268.3	20429	22349.7	20478	15428.7	12547.3	60210.7	12504	16459	14030.7	11967.3
Small nuclear ribonucleoprotein Sm D2 OS=Homo sapiens OX=9606 GN=SNRPD2 PE=1 SV=1	10.65	13641	7546.02	P62316	7	44.92	0	SMD2_HUMAN	18799.3	16952.3	18442.7	10332.7	11516.7	14013.7	10508.7	11572.3	12393	12625.7	15226	14352.3	16469.7	17005.3	17778.7	20509.3	19845.7	23913.7	26598.3	30891.7	36527.3	13865.3	15470.3	21640.3	14573.7	11922.7	12954.3	19140.3	19729.7	32728.3	27261.7	29810.7	40965.7	48002.3	48631	54379	44545.7	48695.7	46863.3	38400.3	42519
Putative heat shock protein HSP 90-alpha A4 OS=Homo sapiens OX=9606 GN=HSP90AA4P PE=5 SV=1	4.89	47826	7544.06	Q58FG1	12	32.3	0	HS904_HUMAN	15487.7	15283.3	15722.3	20571.4	19962.3	23569.5	19870	20563.3	24040.3	20866.7	24376.5	21018.7	14025.3	13066	17390	7241.67	6433	9205	5843.67	3671.3	7497.33	14503.7	11775.2	10259.2	8886.43	9277.79	9340.85	14059.9	15471.6	11961	8980.42	10910.2	8667.9	11126.3	12108	12271.7	9341	8931	9224.67		5739.5
ATP-dependent 6-phosphofructokinase_ platelet type OS=Homo sapiens OX=9606 GN=PFKP PE=1 SV=2	7.37	86508.7	7541.52	Q01813	30	38.39	0	PFKAP_HUMAN	97734	99908.3	100280	97372.4	98346.6	75526.1	97093	101797	96224.7	113805	102224	115661	119015	117218	106919	97036.3	94474.7	89347.7	60275	63600	57288	45971	45583.8	40375	35260.3	33388	35062.3	41334.8	41874	35875.7	60752.1	51511.5	38666.7	48689	58083.7	49406.7	50771.7	59469	57153.3	20729.3	20819.7
Citrate synthase_ mitochondrial OS=Homo sapiens OX=9606 GN=CS PE=1 SV=2	8.47	51940.7	7497.37	O75390	19	52.15	0	CISY_HUMAN	44285	41634.3	45849.3	92878	94476.3	86592.3	101284	92480.3	94915	96386	99816	99053.3	54570	51997	46065	11846.7	10739	12963.7	13347.5	22982	26421	133526	141547	125286	121974	155735	132263	137646	133237	110847	111379	120191	112729	77843	72765.7	64988.7	40786	31339	37372.7	21320.7	18087.3
Endoplasmic reticulum resident protein 29 OS=Homo sapiens OX=9606 GN=ERP29 PE=1 SV=4	7.31	29050.5	7458.96	P30040	10	32.95	0	ERP29_HUMAN	33752.7	29066.7	30399.7	39383	38827.7	46379.3	38518.7	39339.3	47838	36941.3	50305.7	39087.7	33067	31130.7	41063.7	32822	31274	41154	36852.3	36289.3	45775	57725.3	57433.7	49379	48674	48715.3	48803.3	65947.7	68252.7	55800.7	78070.3	77059	61480	55384	79413.3	74598.7	62089.7	74475	63008	34717.7	43935.3
Trifunctional purine biosynthetic protein adenosine-3 OS=Homo sapiens OX=9606 GN=GART PE=1 SV=1	6.28	109022	7454.99	P22102	41	46.53	0	PUR2_HUMAN	14540	13284	11236	65927.7	68639.7	70865	50314.3	53151	58824	30094	35178.7	30611.3	9608.33	10175.3	10768.7	7816.67	10038	12316	10221	10279	11107.7	56615.7	56319	56518	56736	51625.3	57764	47443.3	49560.3	47733.3	30107	31342.3	32677.7	22355	21393.3	19225	20975.3	19043.3	21373.3	13101	12228.7
Actin-related protein 2/3 complex subunit 3 OS=Homo sapiens OX=9606 GN=ARPC3 PE=1 SV=3	8.83	20774.8	7420.94	O15145	7	38.2	0	ARPC3_HUMAN	3802	6158.67	7481.33	13358	12960	14070.3	9494.67	11879.3	12098.3	15241	16826	14139	12947.5	19667.5	12049		7475	6114			3557	15244.3	14518	13916	16065	15452.7	22085	12147.7	21063	9755.5	26437.7	28906.7	18261.3	13971.3	8810.33	15065.7	6084.5	5025	4483.67
POTE ankyrin domain family member J OS=Homo sapiens OX=9606 GN=POTEJ PE=3 SV=1	5.6	118816	7417.18	P0CG39	26	23.99	0	POTEJ_HUMAN	8238.57	9620.85	8620.34	14845.1	15005.5	13355.9	15801.1	14512.6	11228.8	24055.4	17429.7	21656.8	22169	21512.9	11317.1	13485.7	17476.8	10047.8	12437.8	14586.7	8978.88	8315	7844.33	8715.67	15619.9	11548.2	13844.2	7954.41	6290.41	3981.36	5712.4	5447.67	5021.33	5135.24	6156.81	6826.23	6455.8	4741.94	5089.82	3470.54	6871.99
60S ribosomal protein L22 OS=Homo sapiens OX=9606 GN=RPL22 PE=1 SV=2	9.76	14844	7402.75	P35268	5	35.94	0	RL22_HUMAN	32532	29103	29583.5	44828	43468.3	44101	40892	41509.7	42747	33233	37349.7	30265.3	23089.7	23052	25578.3	17538	16267	13568.3	24941	24867.5	25378	25218.7	24621.7	26171.3	23112	20845.7	20828	26702.7	28034.3	28372.3	37311.3	35138.3	31605	40583.5	33490		32510.5	32021.5	33050.5	19158	21919
Transgelin-3 OS=Homo sapiens OX=9606 GN=TAGLN3 PE=1 SV=2	7.19	22643.8	7391.66	Q9UI15	5	24.12	0	TAGL3_HUMAN	6993.46	6350.49	12467.5	13959.4	12927.1	16714.4	4850.28	7015.17	13338.7	13509.6	20791.4	14127.9	4831.11	13107.5	18258	8569.16	16829.9	23106.5	9955.19	19315.6	27055.9	4614.6	4983.27	3519.86	8810.14	6147.48	7010.75	4850.74	5690.54	4570.81	5435.07	3336.71	3043.68
S-methyl-5'-thioadenosine phosphorylase OS=Homo sapiens OX=9606 GN=MTAP PE=1 SV=2	6.84	31749.3	7344.13	Q13126	12	53	0	MTAP_HUMAN	11337.3	13494.3	16142	9331.33	9016.33	9880	8277.33	9939.67	10663	12709.7	13147.7	13268.7	14666	14777.3	16119	18457.7	17835.7	18578.7	22117.3	23485.3	23369	9661.67	10451.7	9639.67	9166.67	10162.3	10453	12332.7	11205	10648.3	12560	15300.7	16956.7	17088.7	10155.7	11306	12165.3	11279	8774.67	11394	12314.5
Mitotic checkpoint protein BUB3 OS=Homo sapiens OX=9606 GN=BUB3 PE=1 SV=1	6.42	37611.1	7338.32	O43684	13	51.22	0	BUB3_HUMAN	30183.7	30322.7	28814	33953	34357.3	32581	32347.7	32584	27053.7	31696	32358.3	35297.3	25388	23365.7	19828.7	16275.3	14577.3	19348	18709	18229.7	23206.7	41655.3	41253	41602	38598.7	73340	68933	42987	39305	42366.7	52695	41753.7	43825.7	39246.3	38468.3	34961.3	30495	30265	27815	42506	31418.7
60S ribosomal protein L12 OS=Homo sapiens OX=9606 GN=RPL12 PE=1 SV=1	10.11	17989.7	7275.03	P30050	4	24.85	0	RL12_HUMAN	25823.5	22830.5	23519.5	21567	21061.3	22985	20426	20620	21430.3	20182.7	20905.3	20691	16071.3	16956.7	16773.7	16926	11948	11012.7	22662	16046	14880.7	25277.3	24070.7	21370.3	23391.3	24805	24006.7	52549.5	48405	29038	46604	32248.3	40233.5	32365.5	24891.5	25407.5	20669.5	24123	29444.5	30444	27842
Ras-related protein Rab-8B OS=Homo sapiens OX=9606 GN=RAB8B PE=1 SV=2	9.55	23755.2	7244.05	Q92930	5	23.67	0	RAB8B_HUMAN				2382.7	2213.88	3107.63	2969.12	2713.21	3275.98	2114.36	2231.23	1906.39										3832.95	3359.35	2641.24	3197.16	2666.09	3141.68				2405.5	2653.74	1616.35	2682.46	1965.53	4664	1890.95	2104.44	2918.73
Serine/arginine-rich splicing factor 7 OS=Homo sapiens OX=9606 GN=SRSF7 PE=1 SV=1	12.31	27594.7	7231.34	Q16629	6	24.79	0	SRSF7_HUMAN	34519.1	47241.4	40273.8	34462.5	35453.4	37740	34602.7	40390.2	41469.8	38191.8	41465.4	41181.8	45356.9	52293.6	39340.1	51754.1	48385.9	42155.7	60136	65062.3	51682.9	21287.2	24614	22995.8	16314.1	11931.8	16512.4	27913.4	27906.9	26879	36845.2	29165.7	23627.5	25527.3	24825.7	4044.36	30674.3	28745.7	27698	75727.7	75314.7
NSFL1 cofactor p47 OS=Homo sapiens OX=9606 GN=NSFL1C PE=1 SV=2	4.81	40572.9	7212.76	Q9UNZ2	19	58.65	0	NSF1C_HUMAN	19879.3	19974.3	20024.7	34061.7	33361.7	34111.7	34507.7	32310.3	33350.7	31866.7	32235.3	33257	20486.3	19396	21612.3	83699.3	70015.3	85260.3	20504.3	19188.3	21495.3	28046	26795	27234	25999	27512.7	21846.3	33087.7	34209	33036	31022.7	32456.3	34227.3	27152	23818.7	20718	24802.7	21755.3	26628.3	20944	23506
RNA cytosine C(5)-methyltransferase NSUN2 OS=Homo sapiens OX=9606 GN=NSUN2 PE=1 SV=2	6.36	87269.3	7207.46	Q08J23	35	57.63	0	NSUN2_HUMAN	13412.3	12460.7	13600.3	25584.7	25354	30048.7	23094.7	23033.7	28629.3	23170.7	26396	24786.7	13790	12281.7	16319.3	5375	6507	5902.33	4799.67	5509	6942.67	34186.3	34350	28258	25726	21437.7	22557	19992.7	19812.7	20761	19532.7	20883	19535	12483.3	9469.33	8283	4669	4569.33	5397.67
Serine/threonine-protein phosphatase PP1-gamma catalytic subunit OS=Homo sapiens OX=9606 GN=PPP1CC PE=1 SV=1	6.13	37725.2	7194.94	P36873	7	23.22	0	PP1G_HUMAN	10516.5	14544.6	14908.2	21341.6	20280.9	26735.2	20302.2	22142.8	24378.6	21923.6	26047.3	23603.2	12818.9	14367.6	15450	7163.88	7211.92	8633.84	4798.42	4964.43	6077.99	42981.1	42391.3	38866.4	31217.4	30009.8	29513.8	38600.2	37636.2	32777.6	35626	36023.4	35635.3	29041.6	24579.9	21417.5	17868.1	13466.3	14170.3	15809	13532
Dynein light chain 1_ cytoplasmic OS=Homo sapiens OX=9606 GN=DYNLL1 PE=1 SV=1	7.24	10537	7176.88	P63167	3	26.97	0	DYL1_HUMAN																						21817.8	20087.8	21885.2	17281.5	20112.4	21742.5	16827.6	17476.7	15475	12548.6	11709.3	11592.8	9744.35	8303.49	10618.5	15839	11205.8	8643.42
60S ribosomal protein L13 OS=Homo sapiens OX=9606 GN=RPL13 PE=1 SV=4	12.16	24318.5	7160.76	P26373	9	40.76	0	RL13_HUMAN	12963.3	11696	11919.3	18474	17226.3	20790.7	16767.7	16960.7	21178.3	14331.7	16558	13821.3	11908.7	11468.3	13349.7	9115.5	9667.67	11381.7	20570	19985	23473.3	4482	4892.67	5282.33	6125.67	4299	3959	7408	9000.67	9532	4482.33	4562.33	5529.33	5296.5	6429.67	6351	5921	3710.5	4160.67	7290	4580
Serine/threonine-protein phosphatase PP1-alpha catalytic subunit OS=Homo sapiens OX=9606 GN=PPP1CA PE=1 SV=1	5.92	38253.5	7122.77	P62136	11	37.27	0	PP1A_HUMAN	10630	10108.6	10676.9	18897	19836.5	22787.5	19680.3	20362.7	22733.6	17148.8	19123	19442.3	11186.4	10769.1	11634.6	3857.64	4367.76	4958.77	3749.43	3560.57	5125.1	22967.6	21513.8	21229	19885.4	16023.2	20180.1	21979.4	21930	21368.7	17824.5	18311.2	20177	18541	15220.2	14327.1	13556.7	9177.73	12940.7	7860	8594
Y-box-binding protein 2 OS=Homo sapiens OX=9606 GN=YBX2 PE=1 SV=2	11.36	38575	7120.43	Q9Y2T7	6	21.43	0	YBOX2_HUMAN				9971.03	9845.44	9518.71	10956.9	11941.3	12756.9	6753.58	7698.96	6291.51	7144.28	6983.29	7611.36							5379.45	6316.84	6848.41	7517.96	8858.05	8622.87	5805.66	6094.98	5535.59	6210.55	8911.65	7543.9
Radixin OS=Homo sapiens OX=9606 GN=RDX PE=1 SV=1	5.99	68678.1	6987.44	P35241	36	51.46	0	RADI_HUMAN	36589	47075	53234.3	37431.2	35723.1	40218.2	46560	49009.4	57029.7	47817.6	54917.5	48183.4	71581.3	73268	75828	21720.3	32500.3	33278	12170	14060	14100.7	48248.7	46753.1	48223.1	85994.9	82879.3	78233	35289.3	32978	32273.3	48765.4	68453	55465.5	44882	36054	30989	21692.7	18154.7	20017	2806.17	6863.18
Myosin-10 OS=Homo sapiens OX=9606 GN=MYH10 PE=1 SV=3	5.28	229969	6977.07	P35580	101	52.83	0	MYH10_HUMAN	18896	16684	16762.3	38618.7	38689.3	46199.7	38884	38809.3	48661	19405.3	21045.7	21129.3	19242.7	19030	19384.3	10213.3	10690.3	9433.33	21973.7	21975.3	21621	49488.7	45531.3	42582.3	46480.3	48437.3	59744.3	28711.7	30338.3	24686.7	24511.7	30932.3	33040	24134	19049	18632.7	23779	18591.1	26287	22212.3	22478.7
Heterogeneous nuclear ribonucleoprotein H3 OS=Homo sapiens OX=9606 GN=HNRNPH3 PE=1 SV=2	6.44	36983.6	6975.54	P31942	11	46.24	0	HNRH3_HUMAN	5848	4339		12815.7	11028	14335.3	5151.67	4615.67	7409	4700.33	5863.67	4987.33		2527	3879.33			3769	5532	4943	4755	33048	34111	33834.7	29512	28407.7	29781	27390.3	25646.7	25251.7	20008	21597	20609	19782.7	19375.3	17753.7	15587	14487	14336	13868	13486.7
Pyruvate dehydrogenase E1 component subunit beta_ mitochondrial OS=Homo sapiens OX=9606 GN=PDHB PE=1 SV=3	6.23	39575.7	6974.27	P11177	14	38.72	0	ODPB_HUMAN				17095.3	14964.3	19253.3	12267.7	12286.3	15581.3	7848.33	10188.3	8217.67			2943.67							26541.7	27321	23842	24774.7	22695.7	22949.3	18209.3	18215.3	18350.7	9386.67	11629.7	11762.3	8667	8026.33	3998.67	6046.33	6359.67	6882.33	5525	6060
MARCKS-related protein OS=Homo sapiens OX=9606 GN=MARCKSL1 PE=1 SV=2	4.45	19585.8	6947.51	P49006	5	54.87	0	MRP_HUMAN	23425.7	21096.3	22731.7	18977.3	19149	22534	21047.3	19341	18612	20356	14794	19131.3	28556	28580.3	28003.5	38405	37036.3	35537.5	45751	46804	33453.3	28637.3	28943	25323.7	24211.3	36629.5	24398.7	32960	51300	32334.3	47921.3	40302	37509.7	44148.3	36765.3	50388.3	59736	44015.7	56228.5	64071	105359
39S ribosomal protein L12_ mitochondrial OS=Homo sapiens OX=9606 GN=MRPL12 PE=1 SV=2	9.3	21576.3	6947.17	P52815	5	25.25	0	RM12_HUMAN	39568	34008.3	33748.3	27183.7	29228.3	36667	24873.7	27351	32969.5	30057	28056.7	30242.3	32643.3	31414.3	31173.7	43149.3	38024.7	38192.7	42100.3	41755	42598	53674.3	56130.7	53698	41883.3	45313.7	49048.7	52981.3	59242.3	56713	69057.3	57863	67661.7	82065.3	59570	63069.3	136630	121698	118755	122070	145016
Ribose-phosphate pyrophosphokinase 1 OS=Homo sapiens OX=9606 GN=PRPS1 PE=1 SV=2	6.57	35347.5	6944.97	P60891	12	39.62	0	PRPS1_HUMAN	31537.8	28615.4	30473.8	21762.1	23241	25467.4	25636.7	25920.8	24781.7	32680.3	29429.3	32888.3	30913.4	28774.5	32323.9	6062.46	9924.21	10681	3495.93	4092.37	4239.86	33530.2	33483.1	34387.8	33897.9	27678.1	31934.7	33320.1	33867.9	35216.6	35075.1	39612.7	37840.3	35426	36131.9	33304.9	27716.3	24514.1	25428.2	9321.67	8180.67
Kinesin-1 heavy chain OS=Homo sapiens OX=9606 GN=KIF5B PE=1 SV=1	6.1	110426	6900.76	P33176	50	53.48	0	KINH_HUMAN	14424.8	12674.2	9252.16	24005.7	23027.7	35559.7	23656.3	21013.7	32945.7	9086	13699.3	9652	3862.33	3731.55	7322.67	11585.6	12395.9	4392.76	4973.77	8117.95	6028.85	33269.3	51708	32311	28735.7	35342.7	28738.3	43347	23854.3	23121	15100	16549	15842.3	14873	12967.7	13917	8677.33	9881.33	9438	4660	4186.33
Plastin-2 OS=Homo sapiens OX=9606 GN=LCP1 PE=1 SV=6	5.12	70858.8	6887.59	P13796	33	58.85	0	PLSL_HUMAN	62162.3	58868.3	60760.3	40409.2	41366.5	45804.7	43982.8	49231.3	51995.3	59264.7	58745.7	64707.3	76212.7	69731.3	77390	60087.9	55804.3	60671	43721.7	53024	76969.7	32404.2	31846.6	26436	25943	25834.7	24924.3	31994.9	32632.8	30437.7	37596.7	36596.3	36250.3	36158.7	36870	31260.4	36131.3	33057.7	38464.4	26458.7	23659.3
Methylosome protein 50 OS=Homo sapiens OX=9606 GN=WDR77 PE=1 SV=1	4.84	37465.8	6876.61	Q9BQA1	5	29.53	0	MEP50_HUMAN	26097	17341.7	17607.3	38983	36219.3	32868	38672.3	33343.3	32182.7	36488.7	34035.7	41579.7	14693.3	14791.3	16064.7	4759.5	5992.5		8621	5841	5717.5	27521	26526.3	21542.7	22480	28874.3	29034	26347.3	23752.7	20876	27172.3	30045	28527.3	18820.3	15532.7	22449.3	16449	16663		5649	12057
Protein HEXIM1 OS=Homo sapiens OX=9606 GN=HEXIM1 PE=1 SV=1	4.64	40908.7	6861.69	O94992	11	30.92	0	HEXI1_HUMAN	19563	19370.7	20902.7	13846	13350.7	14490.7	13716	13820	15843.3	16208.3	18654.7	16604.7	23139.7	21880.3	23620.3	33557.3	25095.7	29861.3	29801.7	30818.3	33615	26125.7	26099	23546	24382.7	24995.3	25882.7	31495	30234.7	29156	31170	33323.3	34026.7	39466.3	39107.7	33565	30064.3	35003.3	36150	17479	28324.3
Galectin-3-binding protein OS=Homo sapiens OX=9606 GN=LGALS3BP PE=1 SV=1	4.95	66243.5	6833.44	Q08380	20	35.56	0	LG3BP_HUMAN	78260.3	68558.7	90708.3	58376.7	56651.3	60816.7	65978.7	63588.7	66963.7	73205.3	86971	86513.7	104592	102283	110002	113962	105170	121826	129428	135683	143609	78429.7	76232.7	93350	83908.3	70402.3	71580.7	106400	98013.7	90718.7	108434	110907	119430	125729	105187	94721	110082	108690	110455	111888	114381
60S ribosomal protein L6 OS=Homo sapiens OX=9606 GN=RPL6 PE=1 SV=3	11.28	32785	6832.41	Q02878	14	42.71	0	RL6_HUMAN	19714.3	17197.7	18740.7	51397	46630.7	55169.7	46421.7	47393.7	48428.7	31976	35562.7	31618.3	20427.7	20561	23909.3	11101	11402.3	12700	20892.7	27085.7	29359	2751	3341.5	3018	2447	3108.33	3291	4615.5	4842	4780	1627	8071	6760	5998	7855		6231	7892	7561	4860.5	6174
Mesencephalic astrocyte-derived neurotrophic factor OS=Homo sapiens OX=9606 GN=MANF PE=1 SV=3	8.83	21156.4	6828.34	P55145	6	28.02	0	MANF_HUMAN	19239.7	19004	19211.7	20511.7	24331.7	19233.3	20133	23169.7	18546.7	20299	18654	22929.7	34530.7	35436.7	28185.3	35188.7	31970	28454.3	48576	48193.3	42829.7	24904.7	25772	25447	32175.3	26921.7	27408	29043.3	25735.7	29383.3	25135.7	31882	34927	35914	34331.3	35800.7	45841.3	38825.7	41650.3	56806.7	56371.7
Tryptophan--tRNA ligase_ cytoplasmic OS=Homo sapiens OX=9606 GN=WARS PE=1 SV=2	5.81	53507.7	6819.6	P23381	25	49.68	0	SYWC_HUMAN	32857	35039.3	38105.3	34581.3	33999	30237	37944.3	36787.7	31822.7	41996	41583	45171.3	41489.3	39383	35689	37981.7	36894.7	35585	37494	36445.7	34175.3	30552.7	30285	28650	26511.7	25146.7	23012	34221.3	30217.3	25224.7	34884.3	36695.3	33697.7	27974.7	31630	21229.3	26455	30755.3	28928.3	16043.3	21015.3
Heme-binding protein 2 OS=Homo sapiens OX=9606 GN=HEBP2 PE=1 SV=1	4.35	22875.5	6806.13	Q9Y5Z4	8	46.83	0	HEBP2_HUMAN	20520.5	18497.3	20650	25159.7	22879	33497.3	25895.7	24686.3	30584.7	25593.7	33098.3	27908	27775.3	20658	24571.7	17993.7	16569.7	21556	21395	23187	27807.3	41520.7	22741.3	21563.7	19463	42651.7	22403.7	42045.3	22882	21801	46360	28467.3	25653	21334.3	16336.3	33577	17776	21876	24467.7	22371	22819.3
Ras-related protein Rab-35 OS=Homo sapiens OX=9606 GN=RAB35 PE=1 SV=1	8.39	23310.4	6800.31	Q15286	6	40.8	0	RAB35_HUMAN		4611		8602	5108	5619	8727	7056	7693	7366	5135.33	8281	5430	4442	6140.5			6524			7845			4514		2030.33	1564	4047.5		6113	9152					11457		7397
Heterogeneous nuclear ribonucleoprotein L OS=Homo sapiens OX=9606 GN=HNRNPL PE=1 SV=2	8.19	64760.2	6786.4	P14866	15	44.31	0	HNRPL_HUMAN	5239	4088	3905.5	37298.7	38756.3	57036	19824.7	17994	32029.7	7830	17034.7	10138.3	6844	6024.67	13383	4177	3967.33	7912.67	4220.33	3903.33	10760	93158.7	87780.3	88442.7	61348	62122.3	63150.3	58300.3	54089.7	55583.3	26235.7	27938.7	30023.7	24143.7	24127	23081.7	18008.3	16118.3	17912.3	14200	19813.5
ATP synthase-coupling factor 6_ mitochondrial OS=Homo sapiens OX=9606 GN=ATP5PF PE=1 SV=1	10.17	12587.5	6779.35	P18859	2	20.37	0	ATP5J_HUMAN																3427	2962	4417	12295	6527.5	11113										3609	3560	2639					8651		24234
Isocitrate dehydrogenase [NADP] cytoplasmic OS=Homo sapiens OX=9606 GN=IDH1 PE=1 SV=2	6.6	46944.5	6759.96	O75874	20	54.35	0	IDHC_HUMAN	37226.3	37698	39759.7	42763	46919	55351.7	41726.3	45959.7	56244.3	51720	46865.7	54270.7	28136	28972.7	20052.3	106756	106285	4394.67	131753	146835	4658.67	31152	30767.7	31364	30134.3	26870.3	30033	33007.3	31380.7	27436	27625.7	29309	26612.7	19792.7	20515.3	18603.3	10254.5	8925.93	9887.75	5682.5	8520.5
Apoptosis regulator BAX OS=Homo sapiens OX=9606 GN=BAX PE=1 SV=1	4.89	21298.5	6751.75	Q07812	10	55.73	0	BAX_HUMAN	24340.7	25201.7	25346.3	23088.7	19833	24294.7	20998	22793.3	23372.3	26832.3	32115	28210.3	26017.7	25736	26687.3	25819.3	26831.3	29165.7	28162.3	28394.3	30246	6704.67	6683.33	7289	10582.3	9009	8960	9420.33	9161.33	8726.33	7429.67	10871.3	10541.3	10980.7	11561	7488.33	10364.7	10463	11464	15119	10430.3
60S ribosomal protein L28 OS=Homo sapiens OX=9606 GN=RPL28 PE=1 SV=3	12.5	15804.6	6741.4	P46779	7	37.96	0	RL28_HUMAN	5065.33	4412	5908.5	11252.7	10895.3	15492.3	7623	8739.5	11182.7	6566.33	9573.33	7481	6981	7786	6865	4238	3999	5367.33	7009.33	8004.33	10354.3	9461	7040	5181.33	4575.33	4753.33	7102	5875.33	5670.33	5003.33	4624	4699	4768.33	4750	6887	5587		3867	2770.5		3817
Eukaryotic translation elongation factor 1 epsilon-1 OS=Homo sapiens OX=9606 GN=EEF1E1 PE=1 SV=1	8.92	19867.6	6714.34	O43324	11	58.05	0	MCA3_HUMAN	23662	21843	18967	22573	19878	20563.3	9638.33	11072	11984	9080.67	10624	10929	21403	20713	12225.5	6242	5179	6807			3191.67	25060.7	25381.3	24657.7	21214.3	20908	21679.7	14935	14494.3	14893.7	11469	10634	6773.33	7075.33	9694.33		6725.5	6913	7644.67	6025	6067.67
Keratin_ type I cuticular Ha6 OS=Homo sapiens OX=9606 GN=KRT36 PE=2 SV=1	4.71	53387.7	6698.15	O76013	18	34.69	0	KRT36_HUMAN			11803.6	5717.16	5395.99	3996.79	4586.82	7971.75	4849		8690	8340.54	14534	11626.3	8389	3576.94	9537.9	4256	4055	3807	6113.34	17178.2	17353.4	14786.9	10660.9	9241.68	10508.9	19192.3	29304	19172.6	7920	20615.3	20055.5	6640.55	8725.75		13169.5	12064.7	13628.7	11636.5	11930.5
Calponin-3 OS=Homo sapiens OX=9606 GN=CNN3 PE=1 SV=1	5.64	36584.9	6687.23	Q15417	14	63.53	0	CNN3_HUMAN	13412.3	13255.7	13189.7	34908.3	33091.7	36516.7	27707.9	26420.2	28598.8	15642.9	17030.8	15995.8	13395.3	12650.4	14718	13822.7	13152.3	13366	15759.7	15738.3	15974.3	31869.7	30588.8	30273.7	24456.3	21508.3	21253	35621.8	35089.3	32440.6	25859	25231.7	24253.1	24193.9	23549.6	20844.3	22348.8	20428.4	21828.4	20121.3	19321.1
Serine/arginine-rich splicing factor 8 OS=Homo sapiens OX=9606 GN=SRSF8 PE=1 SV=1	12.2	32401.6	6670.48	Q9BRL6	8	23.76	0	SRSF8_HUMAN				9044.27	7165.04	9107.67	5539.98	5686.46	6223.37	7310.48	11076.4	7222.7	14532.3	14093	9039.69	5795	5320.01	5824.76	11787.2	10231.2	13499.1	9055.77	10794.8	9821.31	5893.79	7127.03	4527.14	8358.88	8263.48	10794.2	17734	10166.1	15652.7	15044.1	12647.7	5650.67	27587.8	5441.5	23923.3	51341.6	29165.6
Serine/threonine-protein phosphatase PP1-beta catalytic subunit OS=Homo sapiens OX=9606 GN=PPP1CB PE=1 SV=3	5.79	37985.3	6663.03	P62140	9	29.05	0	PP1B_HUMAN				5223.6	5224.08	7217.08	2568.07	2646.91	4013.19	1213.35	1984.08	1158.76										7480.77	7797.56	7714.21	9501.52	9012.54	9200.33	6494.67	6289.69	5618.65	3350.41	5826.67	6629.81	5163.15	4304.83	2666.35	2753.9	2390.82	2298.62
26S proteasome non-ATPase regulatory subunit 13 OS=Homo sapiens OX=9606 GN=PSMD13 PE=1 SV=2	5.45	43230.7	6618.08	Q9UNM6	21	62.77	0	PSD13_HUMAN	14637.3	14116	13948	34599	32982.3	40371.7	32329.7	33959	38528	22387.3	23866.3	23078.3	10950	10361	11061	12449	12791	14035.7	11960.7	11599.7	13101.3	32690.3	30330	32104.7	30630	52672.3	26597.7	23621	24512.7	24838.3	17732.3	17273.7	17494.7	14346.7	12833.7	11562.7	12023.3	10155.7	10793.7	8499.33	8875
Pyridoxal kinase OS=Homo sapiens OX=9606 GN=PDXK PE=1 SV=1	5.72	35330.5	6599.89	O00764	7	29.17	0	PDXK_HUMAN	4532			8966	10113.3	11090	6578	8525.33	11194.3	11513	12104	8293	4608	6901	6496			4097			3603	10946.7	11800	9746.33	11890.3	11990	14355	10424	11886	11333	18774	14268.3	12190	11693.7	10216	15235	11966.5	7855.33	12084.5	10670	12027
Protein phosphatase 1G OS=Homo sapiens OX=9606 GN=PPM1G PE=1 SV=1	4.07	59956.1	6593.82	O15355	21	44.14	0	PPM1G_HUMAN	21676.3	19026.7	21714.3	58044.7	59086.3	60029.7	31817	29949.3	33695.3	19740	23753.7	19180.3	26523	23966.3	28969.3	24237	21836	25935.7	29180	28472	30129.7	84033	81710.3	41823	38124	54163	55209	19846	23783.7	22995.3	14653.7	16394.7	17123.7	20097.3	21672.3	12674	23811.7	20417	25319.7	26071	44596.3
Replication protein A 14 kDa subunit OS=Homo sapiens OX=9606 GN=RPA3 PE=1 SV=1	4.75	13682.8	6586.07	P35244	5	64.46	0	RFA3_HUMAN	32325	19405	21426.5	38366.3	39501	38014.7	36074.3	38196	36029.7	39533	37457	41068.5	38548.3	38246	34805.7	15655	13160	12977.7	13082	12204	10693	36554.3	35156.3	28264.7	36963.3	30889	31778.3	29812	27932.3	38780	29983.7	37820	26825	44528	45473	39753.5	25062.5	27985.5	30006.5	18971	16632
Dynein light chain 2_ cytoplasmic OS=Homo sapiens OX=9606 GN=DYNLL2 PE=1 SV=1	7.26	10463.9	6542.37	Q96FJ2	4	26.97	0	DYL2_HUMAN	22098	20347	13859	16954	18626	20326	18692	20091	18820.3	17022.5	23819	17636	15161.5	15996	20318	11188	10675.5	15195	12238.5	13916	18495	19059.5	18076.9	17846.1	16263.5	14455.4	15638.3	18200.4	17339.6	22401.4	43524.5	37060	34098.3	40243.6	45554.3	50222.5	34667	40065.2	40423.9	32998	40512.5
F-actin-capping protein subunit alpha-2 OS=Homo sapiens OX=9606 GN=CAPZA2 PE=1 SV=3	5.49	33177.2	6537.07	P47755	13	62.59	0	CAZA2_HUMAN	48431.6	51128.8	54077.6	42927.6	41504.3	43148.1	43886.3	41516.9	45408.4	43876.1	47012.5	46413.1	48073.8	48039.7	46778	35876.3	35853	31037.4	25749.9	26099.9	25916.4	108708	107032	94628.5	99627.6	105188	96883.9	105226	99641.1	84886.5	101458	107651	105591	95868.8	96120.3	88488.2	70774	92749.2	77812.5	13588.8	16756
Eukaryotic translation initiation factor 3 subunit B OS=Homo sapiens OX=9606 GN=EIF3B PE=1 SV=3	4.7	92880.9	6526.54	P55884	33	44.23	0	EIF3B_HUMAN	11520	8989.67	9193.33	40420.3	38854.7	50193.3	30614.7	30132.7	37546	10874.7	14953.3	11977.7	10386.3	10244.3	11382.3	12906.7	12820.7	13857.3	12272	11681	13675.7	42040.3	42218	38378	40302	39823.3	41067.3	27956.3	26274.3	28612	14687.3	16945.3	14183.7	20084.3	21856.3	16684	18660.7	18279.3	24228.3	8238.67	8151.67
Elongation factor Ts_ mitochondrial OS=Homo sapiens OX=9606 GN=TSFM PE=1 SV=2	8.48	35732.9	6522.33	P43897	9	35.38	0	EFTS_HUMAN	37993	44275	43816	20673.7	21910.7	23994.7	15180.3	14419.3	18490.3	44617	45961	44792	42936	40541	46527	36452	41845	40870	34473	30940	37897	28683	28703	26597.3	19229.3	17926	18292	14358.7	12979.3	13703.5		26760	22350	19724.5	22150.5	4652	17874.5	36522	31333	20982	15219.5
Ras-related protein Rab-15 OS=Homo sapiens OX=9606 GN=RAB15 PE=1 SV=1	5.4	24675.8	6519.72	P59190	3	14.15	0	RAB15_HUMAN				4701	3696	4040	9320	5430	6801.5		4718	3688	3736	3922	4507			3930.5			3708	7368.5	6221.5	5530	7544	6579.5	6433.5	7387	5177	5642	6485	4956.33	5388.33	4291	5850		5611	7050	6934
Eukaryotic translation initiation factor 6 OS=Homo sapiens OX=9606 GN=EIF6 PE=1 SV=1	4.37	27112.4	6511.08	P56537	6	34.69	0	IF6_HUMAN	41554.7	38061.7	41062	19086.7	19010.7	20875	23412.7	22686.7	25256.7	37456.3	38601.3	41509	46526.7	43738.7	42662.7	31274.7	28117	28849.7	12828	13080.7	15161.7	21110.3	24068	21948.7	22678.7	24162	23617.7	45944	42450.3	29378.7	90200.3	65472.7	63709.3	70319.7	67382	64512.3	35158	59480.3	64151	10549.5	16021.7
Protein RCC2 OS=Homo sapiens OX=9606 GN=RCC2 PE=1 SV=2	8.92	56826	6475.7	Q9P258	19	47.89	0	RCC2_HUMAN	7810.33	7993.33	8302.33	44666.3	43891.7	44524.3	42649.3	46085	50224.7	42901.3	46367.3	41972	9151.67	9145.33	10510.7	7057	7916	9165.5	7862	5523	7436.33	41780	39840.3	40709.3	43066.7	27269.3	37739.7	47685	46701.3	48533.3	38740.3	42319.7	45521.3	14859	12941	10634.3	10296.5	5681.33	9081.67		4064.5
Ras-related protein Rab-14 OS=Homo sapiens OX=9606 GN=RAB14 PE=1 SV=4	5.82	24125.1	6446.21	P61106	14	73.49	0	RAB14_HUMAN	7040.33	10657.7	9166	12050.3	12022.3	13610	12459.3	11716.3	13269.7	14770.7	16339.3	15631.3	10864	10948	15154.3	4838.5	4073.33	6005		4017	3098	17707	16833	17280	15652.7	17460	15232.3	12735	11076	9038	13075.7	12329	13982	12030.7	10739.3	8448	8576	7771.67	7542.33		7298
60S ribosomal protein L23a OS=Homo sapiens OX=9606 GN=RPL23A PE=1 SV=1	11.15	17695.1	6440.1	P62750	6	28.21	0	RL23A_HUMAN	21154	19952.3	21290	39800	39944.7	41307	41743.3	42983.7	42726.3	28711.7	26140.7	28281.7	27506.3	26534.7	25914.3	13327.3	11378.7	12691.3	22735.7	22271.7	21771.3	12240	12791	13958.3	15671.7	15080.3	15423	17866.3	19142.7	18613.3	16058.7	15821.7	16169	14366.7	14406.3	68810.5	16470.7	16016.7	14975.7	19031	17488.3
Heterogeneous nuclear ribonucleoproteins C1/C2 OS=Homo sapiens OX=9606 GN=HNRNPC PE=1 SV=4	4.76	33727.1	6436.29	P07910	10	33.33	0	HNRPC_HUMAN	11018.3	6849.67	11205.3	44348	43713.7	50033	27131	28021.3	29729.3	12538.3	14469	13313.7	14486	11555	13407	10524.7	9073.67	10340.7	12500.8	13662	12975.7	52144.5	52564.6	52888	38146.6	37612.1	35558.6	51154.7	50168.9	41597.8	27812.4	25902.6	26262.4	16041	14573	3620.5	10318.3	11345.3	12135.7	20729.7	20797
40S ribosomal protein S14 OS=Homo sapiens OX=9606 GN=RPS14 PE=1 SV=3	10.78	16443.8	6379.92	P62263	6	37.09	0	RS14_HUMAN	10494	11150	10734	23893.7	23083.3	26036.7	16644.3	16364.7	18914	11101.7	12867	11774.3	9485.33	8826	10434	5638.67	7546.33	8652.67	16256.3	11646.7	14702	8278	8859.67	7656	7422.33	5734	7390	8452.33	8367	8210	8368.67	8309	8695	7208	7308.67	4299.67		4329	6271	5395.5	5820
DNA fragmentation factor subunit alpha OS=Homo sapiens OX=9606 GN=DFFA PE=1 SV=1	4.48	36921.1	6379.14	O00273	16	52.87	0	DFFA_HUMAN	31065.7	32424	33438	23982	23443.3	22704.7	24628	23972	23207.3	30998.7	30967.7	31489	35182.7	36388	35524	31627.7	33574.3	34052.3	35086	34880	34494	15113.3	14520	12027.3	16556	13814.7	12230.7	13149.7	11316	13829.3	15022	18629.7	19730.3	20573.7	14023	11402	16308.7	13099	11488	16429	12529
Eukaryotic translation initiation factor 3 subunit M OS=Homo sapiens OX=9606 GN=EIF3M PE=1 SV=1	5.29	42959.2	6338.6	Q7L2H7	13	38.77	0	EIF3M_HUMAN				41788.3	40994.7	39737	34406	35796.3	32965.3	15034	14579	15565.3	5345.33	4647.33	6328		4544	4910.5		4373	4699	35167	35189	29503.3	31433.7	24394.7	25541.3	19197.3	16120.7	14633	17444.3	23130.3	17189	16443	19724	4787	24047	29540	29909.5	33348	49157
Clathrin light chain A OS=Homo sapiens OX=9606 GN=CLTA PE=1 SV=1	4.23	27190.8	6318.86	P09496	6	16.94	0	CLCA_HUMAN	81115.3	86210	85225.7	62843.3	63593.3	59432.7	60798.7	62078.3	61054.3	72763	76657.3	70392.3	99072	96071	101690	99671.3	94877.3	99873	90739.7	120752	127342	38800.7	41080.3	46068.3	44345.7	35519.7	37456.3	51770.3	50836.3	52230.3	72008	60470.7	66120.7	78031.7	78445.7	58745.3	91260.7	77944.3	76316.3	112689	94180.7
40S ribosomal protein S11 OS=Homo sapiens OX=9606 GN=RPS11 PE=1 SV=3	10.95	18601.8	6314.64	P62280	8	27.85	0	RS11_HUMAN	5875.67	5361	7113	11338.7	11991	14649	10197.7	10563.7	14368	8391	10092	7639.67	7745	8841	10757.7	4763	5175	7027	10355.7	9883	13871.3	1618	1756	1861	10858	2386.5	2314	5814.33	1981	8492.5		7775	8038	8646	8656			4031		5745	5377
Protein phosphatase 1 regulatory subunit 7 OS=Homo sapiens OX=9606 GN=PPP1R7 PE=1 SV=1	4.65	41678.3	6305.9	Q15435	17	49.17	0	PP1R7_HUMAN	14024.7	13627.3	12539.7	33236.3	34864.3	42081	32520.3	34655.7	39940.7	23173.3	28059.7	24142.3	11547.7	12516	13168	8480.5	6520.67	9480	9369	12558	10031.3	56205	58625	45371.7	45661.7	50877.3	56417.7	55816.3	60824	47272	13667.7	19370.3	20131.7	20303.7	14778.7	10775.7	17011	9247.33	10039.3	9019	10152.5
Flavin reductase (NADPH) OS=Homo sapiens OX=9606 GN=BLVRB PE=1 SV=3	7.51	22233.4	6251.63	P30043	7	50.49	0	BLVRB_HUMAN	4567	4684	4648	34127.3	34384.3	37384.3	29589.3	30151.3	33697.7	13246	15004.7	13954	3880	4353	5617.33	3433	3776	3564.5	2693.5	4880	5181	12606	12532	14904.3	17233.3	13688.7	11549	14466.3	13082.3	16702.3	7845.67	8112.33	12846.7	5959.67	7085		4741	3249	4841
Splicing factor U2AF 65 kDa subunit OS=Homo sapiens OX=9606 GN=U2AF2 PE=1 SV=4	9.47	53843.3	6251.33	P26368	9	31.37	0	U2AF2_HUMAN	17565	12020	13566.7	32584.7	34045.7	38489	30722.3	33518	39874	24922.3	26971	25328.7	14429.7	13590.7	15416	9770.67	9295	10577.3	5147	7186.67	8401.33	44765.3	47535	46497.3	42020	34239	33267.3	43279.3	44222.3	42580	41422	47316	45285.3	39914.7	24107.7	24994.7	26726.5	12324.5	31132
Eukaryotic translation initiation factor 3 subunit H OS=Homo sapiens OX=9606 GN=EIF3H PE=1 SV=1	6.12	40101.5	6226.43	O15372	20	65.06	0	EIF3H_HUMAN	10065	8974.67	9612	31350	28931.7	28051.7	21589.7	19719	19949	10355.3	10189.3	11031	9307.33	8929.33	8962.67	8368.67	7912	9379.67	8730.33	8289	10739	22491.7	17956.3	21473.7	17693	17901.7	17788.7	15217.7	16191.7	15330	9744.67	13000	13129.7	14894	14895.3	10549.3	14763.3	14959	16164.3	15308	14685
Prefoldin subunit 6 OS=Homo sapiens OX=9606 GN=PFDN6 PE=1 SV=1	9.52	14582.7	6222.07	O15212	7	46.51	0	PFD6_HUMAN	11959	11982.3	13444	13014	12033	11028	12219.3	12251.3	10691	13878	14401.7	16118	13043.3	13369.7	14184.3	14816.3	15273.7	14944.3	16747.7	16220	16761.3	9017.33	8842	8159.33	8502.33	7524.67	7315.67	9663.67	9961.33	9736.33	11669.5	11873.7	12073	12755	16796	31564	18421.5	19182.5	18685.5	16707.7	14877.3
Profilin-2 OS=Homo sapiens OX=9606 GN=PFN2 PE=1 SV=3	6.79	15388.4	6218.44	P35080	6	35.71	0	PROF2_HUMAN	7676	6612	6918	22576.3	21994.7	21694.7	18654	18083.3	19213	13071	14450.3	15583	7993	6054	6737.5	33117	29208	31489			6417	24275	24956.3	20060.7	19403.7	19934.3	19450.3	20575.3	21059.3	17805.3	17951.3	16441.7	16568.3	12348.7	10453.3	11572.3	8506	7087	7955	6287	8989.5
40S ribosomal protein S6 OS=Homo sapiens OX=9606 GN=RPS6 PE=1 SV=1	11.5	28851.8	6191.69	P62753	7	24.1	0	RS6_HUMAN	9105.67	8826	11352.7	22437.7	28220.7	12389.3	23199.3	29344.7	13245.5	19412.7	47558	19433	13837	13434.3	16252	7339	6755.67	7399	61546.7	15886.7	8529.5	54479.5	108656		3249.33	27353	28047	66181.5	59958		3770	92570		124903	160155			145992	178237		163862
Vacuolar protein sorting-associated protein 29 OS=Homo sapiens OX=9606 GN=VPS29 PE=1 SV=1	6.36	20676.8	6168.17	Q9UBQ0	9	56.59	0	VPS29_HUMAN	13361	12804.3	12928.3	14010.7	13483.7	15797	16083	15958	17263.7	17328.3	22709.7	19794.7	16431.7	17130	19599	4666.5	7394.5	7473.33	3995.5	3451	4598.5	14822.3	14646.3	13400.7	12861.7	13347	12822.7	16629.7	16365.7	13577	21128.7	17511.7	18580	17854	16088.3	16454	13704.7	14347.7	14278.3
Hemoglobin subunit beta OS=Homo sapiens OX=9606 GN=HBB PE=1 SV=2	6.91	16112.5	6162.4	P68871	5	44.9	0	HBB_HUMAN	10281	10724.5	9826.5							12347	7648	11606.8																1389	1886			2171.5	2205.5
DNA replication licensing factor MCM6 OS=Homo sapiens OX=9606 GN=MCM6 PE=1 SV=1	5.13	93858.9	6161.17	Q14566	41	48.6	0	MCM6_HUMAN	12778.7	11509.3	12924	39461.7	42107.7	48869	42225	43523.3	50553	21117.7	22410.7	22262.7	15275	17024.7	18335	11810.7	9499.33	12543.3	13372.3	14314	15526.3	37628.3	39308	35890.7	37092	44989.7	37728.3	30119	29568	32124.7	15115.3	18796.3	21023.7	18221.7	16288.3	14952.3	16417	16519.7	16087.7	11484.3	13625
40S ribosomal protein S19 OS=Homo sapiens OX=9606 GN=RPS19 PE=1 SV=2	10.98	16060.5	6139.86	P39019	10	57.93	0	RS19_HUMAN	5744	6060	5508.5	13344	12392	13722	11462.7	9894	10762.3	7727.33	8973	7731.67	5834	5729.5	7205.33			3726.5	4322	4116	6236.67	6648.5	6933.67	7003	6159.33	5457.33	5338.33	7749.67	7266.67	8501	8532	8900.33	9598.33	8237.33	7057		9069.5	12416		11594	11660
Inosine-5'-monophosphate dehydrogenase 2 OS=Homo sapiens OX=9606 GN=IMPDH2 PE=1 SV=2	6.49	56261.3	6137.15	P12268	15	32.88	0	IMDH2_HUMAN	24434.3	23012.7	24435	52118	52406.3	53543.7	37765	39527.7	44784.3	25708.7	24342.3	26768	16310	17468.6	16004.3	16710.3	15196.8	14662	19563.7	18603.3	18107.7	56382.7	54626.7	61248.3	45972	38309	40516.7	43902.7	44538	48185.3	32738.3	33541	38462.3	30155	31092.3	27820.3	29671.3	27141.3	28657.3	16404.7	17175.7
Charged multivesicular body protein 4b OS=Homo sapiens OX=9606 GN=CHMP4B PE=1 SV=1	4.57	24950.2	6128.23	Q9H444	11	56.25	0	CHM4B_HUMAN	43496.3	50325	53764.7	30937	30823.3	35089.7	38757.7	41014	39546.7	48879.3	41717.3	49874.3	56845.3	59066.7	51629	56001.3	56452	44863.3	44495.3	49283.7	46345.7	31367.7	33879	29936.3	35500.7	34954.7	35750.3	27550	40116.3	34712.3	48151	48637.3	44010.7	45533.7	49492.3	47884	48426.3	29790.3	53843.3	36287	40722.3
Isopentenyl-diphosphate Delta-isomerase 1 OS=Homo sapiens OX=9606 GN=IDI1 PE=1 SV=2	5.94	26661.4	6125.55	Q13907	10	51.98	0	IDI1_HUMAN	17173.7	18123	18875	26964.3	26530	29906.3	24625.3	24866.7	26361.7	28878.7	32406	28131.7	29102	26127.7	28862.3	13777	13845.7	17755	13974	15882.7	17970.3	17329.3	18918	16657.7	21783.3	18733	17467.7	18629.3	17128	12192	16175.7	19331.7	15499.7	13299.3	13797.7	9940.67	21969	10940	13122.7	16142	9435.33
GrpE protein homolog 1_ mitochondrial OS=Homo sapiens OX=9606 GN=GRPEL1 PE=1 SV=2	8.24	24507.2	6107.47	Q9HAV7	10	52.07	0	GRPE1_HUMAN				17375.3	15884.3	19547.7	19386	16758.3	21436.7	19297	22307.7	21342.3			2433.5							25270.7	25821.7	31335.7	27628.3	27136.7	21001	31853	32652.3	28601.3	38094.3	42798	44399	17612	9806	11143.7	12078	6500.5	6181.5	10702	8798
S-formylglutathione hydrolase OS=Homo sapiens OX=9606 GN=ESD PE=1 SV=2	6.62	31976.1	6092.3	P10768	8	45.04	0	ESTD_HUMAN	23842.7	21033	21662.3	38295.7	25343.7	31695.7	39879.3	35894	28360.3	41203	38213.3	50836.7	31086.7	20071	31362.5			6856			5699.5	31309.7	22275.3	25255	35920.3	32236.3	32823	35009	29947.7	28655.3	44701.7	33367.3	33560	25852.3	24015.3	21382	15677	13150	15000	11468
26S proteasome non-ATPase regulatory subunit 7 OS=Homo sapiens OX=9606 GN=PSMD7 PE=1 SV=2	6.34	37082.5	6090.08	P51665	12	46.6	0	PSMD7_HUMAN	6145	5603	5483.33	25443.3	26915.3	25199.7	21498	24953.3	23815	16665	15416.3	15298.7	3946	7641.5	6576		3883	4548		4859	6513	17883	17565.7	20308	16620	15690	16274	12205.7	10370	15681.7	11350	12350.3	14967	11310.7	9637.33	7764	5001	8302.5	8006.5
Ras GTPase-activating protein-binding protein 1 OS=Homo sapiens OX=9606 GN=G3BP1 PE=1 SV=1	5.23	52221.4	6070.32	Q13283	17	53.86	0	G3BP1_HUMAN	10669.7	8916.33	11132.3	34082.7	36655.7	37681	27767.7	30106.7	29869	24188.3	26458.7	24693	9754.33	8206	10245.3	10632.3	10580.3	10226.7	12418	12016.7	12952.3	51545.3	45050.3	54812.3	48740	50859.7	55198.3	49997.3	48509.7	51658	58309.7	50429.3	50895.7	19144.3	16562	15621.3	9766.33	10349.3	9442.33		5670.5
Delta-1-pyrroline-5-carboxylate synthase OS=Homo sapiens OX=9606 GN=ALDH18A1 PE=1 SV=2	6.71	88043.8	6062.98	P54886	35	46.16	0	P5CS_HUMAN	6259	7061	6777	36103.3	36282.7	35176.3	39357	36330.3	38483	22480	23925.7	23588.7	10226	9682	8308			3222				50319.7	51788.3	63189.3	51058.7	49682.3	44041.3	47490	53476	54835.3	23850.7	22423.7	26419.7	11771	7996	9310.67	9608	8023	11037	10011.3	8224
Eukaryotic translation initiation factor 3 subunit G OS=Homo sapiens OX=9606 GN=EIF3G PE=1 SV=2	5.78	35896.2	6044.66	O75821	17	65.94	0	EIF3G_HUMAN	16761.3	16681.3	17003.3	44746.7	46849	53161.3	30916	33732.3	39546.3	20404.3	25465.7	20669	17729.3	17364.3	20366.7	16843	17033.3	20414	21009	22432	25193.3	47029.3	48377.7	45919	56826.3	39537.7	37948.7	43573.7	43051.7	40558.3	63323.7	44330.3	38126	38064.7	34458.7	40492.3	36625.7	36464	37999	32052	35519
Splicing factor 3B subunit 3 OS=Homo sapiens OX=9606 GN=SF3B3 PE=1 SV=4	4.96	136661	6036.3	Q15393	43	42.97	0	SF3B3_HUMAN	22305	19552.7	21332.3	27870.3	28769	27702.7	26371.7	24504.3	28751	25595	27257	25064.7	23144.3	25107	23786.3	14051	12004.7	13117.3	13436.3	11890	12767.3	57087	56714.3	53093	41909.7	45908.7	46328.7	57150	53315.3	53443	60702.7	52959.3	51040	60312.7	70784.7	78108.7	48998.7	56093.7	58665.3	29023.3	35216
Aldo-keto reductase family 1 member A1 OS=Homo sapiens OX=9606 GN=AKR1A1 PE=1 SV=3	6.37	36915.3	6034.52	P14550	13	42.46	0	AK1A1_HUMAN	10907	7991	8624	21602.3	21775.7	22745	23982	23850.3	24238.7	13775.3	15474	14372.3	8868.5	13127	4971	5559	5629	4865	4560		3746.5	42387.3	42676.3	32912.3	38658.7	43546	44698	29491.7	26643.3	25937	27483.3	27441.3	24391.7	12329.3	12359.3	2859	8241	8843	8546		8347.5
PDZ and LIM domain protein 1 OS=Homo sapiens OX=9606 GN=PDLIM1 PE=1 SV=4	6.63	36528	6020.45	O00151	15	58.05	0	PDLI1_HUMAN	43930.3	42960	43794.7	36949	36856	32365	35593.7	34693	28824.3	40648.3	39106.3	43398.7	41422.7	40312	34312	52782.7	46740	38690.7	47369	48541	44982.3	36971.7	35511	33212	27334	26040	25540.7	39015.7	39249.3	39918	51546	45868	46618.3	55494	54627.7	50243	55373.7	48024.7	53061.3	46270.7	49622.3
Thioredoxin domain-containing protein 17 OS=Homo sapiens OX=9606 GN=TXNDC17 PE=1 SV=1	5.24	14226	6007.15	Q9BRA2	3	26.83	0	TXD17_HUMAN	28492	26768.5	19982.7	32367	32697	29304	27763.3	33000.7	29813.3	34741.7	32900.7	30674.7	21808.7	23555	21684.7	17121.7	24577.3	18526	18548.3	21555.3	18106.7	20852	21186	21974.3	20405.3	20061	21443.3	21638.7	22534.7	22731	34417	24677	22435	23047	20497.7	17057	23409.5	19626.3	22620.3	43528	22307
High mobility group protein B2 OS=Homo sapiens OX=9606 GN=HMGB2 PE=1 SV=2	7.96	24204.9	6000.47	P26583	6	22.97	0	HMGB2_HUMAN	35053	33223.7	33578.7	35207.7	52926	37091	39007	39107.3	41218.7	39418	48212.3	39793.3	51827	51437	55161.3	45854	43600.3	50496.7	88877.5	88847	73908	32220.3	37967.6	29171.5	23049.1	20041	20013.7	32846	38545.7	33335.6	39565.3	38375	34055.4	36283.3	51188.7	38198.3	43910.1	42620.8	52605.4	42597.1	45362.8
Eukaryotic translation initiation factor 3 subunit E OS=Homo sapiens OX=9606 GN=EIF3E PE=1 SV=1	5.65	52620.1	5997.97	P60228	20	46.97	0	EIF3E_HUMAN				41420.3	42612	44488.3	30628.3	31995	31275.7	5399.67	6999.33	8011	3105.5	4453	4076.5		4130		3907		4525	40549	37923.3	40665.3	35650.7	32505.7	31655.7	18120	18446.3	20079.3	3635.67	4566.67	4770.67	7120	7174	4987	6883.67	6339.33	6370.33	6250.5	5542
60S ribosomal protein L19 OS=Homo sapiens OX=9606 GN=RPL19 PE=1 SV=1	12.01	23580.1	5992.48	P84098	5	23.47	0	RL19_HUMAN	23280	22438	15174	27533.3	27993	34302	38493	29538	34064.5	21007.3	28214.5	20859.7	12961.3	13296.3	28726	9771	9197	10542	16886	15962.5	18318	12450	19522	18633	13607	13562.3	11767.7	27209	12366.5	21724	9699.33	10809	19046	14256	13172	9379.5		6676	7007
Alpha-centractin OS=Homo sapiens OX=9606 GN=ACTR1A PE=1 SV=1	6.22	42727.9	5991.46	P61163	18	59.57	0	ACTZ_HUMAN	11085.6	22602.8	24281.7	27511.7	25032.7	29547.2	26671.3	26394	32151	26870.3	30858.7	26378.9	24521	24077	29036.1	10505	13704	15211.8	6039.85	7174.69	7939.51	31951.3	31853.3	24879.2	31280.5	36053.3	36446	26432.1	25454.6	12082.9	33211	40902.8	26432.9	18588.3	12134.3	9551.11	7252.15	7446.05	7427.57
Growth factor receptor-bound protein 2 OS=Homo sapiens OX=9606 GN=GRB2 PE=1 SV=1	5.89	25320.4	5963.7	P62993	13	53	0	GRB2_HUMAN	16415.7	14912.7	17290.7	21891	23030.3	24959	20553	24408.3	20695	23321	22685.3	27144.7	15840.3	16755	13821.3	12855.3	13729.7	13293.7	12555	13622.3	11190.7	23835.7	23116.3	22139.7	24562.7	20437.7	18853	29061.3	29659.7	32568.3	40231	30160.3	39132	29689.3	22780.3	24601.3	18071	17000	22297	19045.7	21167.3
Eukaryotic translation initiation factor 2 subunit 2 OS=Homo sapiens OX=9606 GN=EIF2S2 PE=1 SV=2	5.46	38730.6	5942.09	P20042	21	59.16	0	IF2B_HUMAN	7746	10600	11448.3	12026	13221.7	15148.3	15635.3	15449.7	16716.7	14567.3	16687.7	14840.7	10310	9735	12750.7	6207	6234.33	8624.33	5639	5716.67	8895	20170.3	19455.3	17959.7	13828.7	13627	13377.7	20196	20435.7	20133.3	19769.7	26072.3	24584.3	17839.3	16995	13647.3	7460.67	10434.7	10655.3		11781
Alanine--tRNA ligase_ cytoplasmic OS=Homo sapiens OX=9606 GN=AARS PE=1 SV=2	5.19	107552	5940.75	P49588	35	47.62	0	SYAC_HUMAN	13229.7	11410.7	9442	39894.3	37053	38896.3	40163.3	39188	42230.7	18050.3	20778.3	17851.7	11380.3	11420.3	9987	8266	8227.33	10566.7		8998.33	10632	31926.3	31068.7	31737	37878	33131	35068.7	25736.7	26368	26226.7	9849	25244.3	27890.3	20246	23352.7	5964	13727.3	13179.7	16295.3	10463.3	9717.67
40S ribosomal protein S26 OS=Homo sapiens OX=9606 GN=RPS26 PE=1 SV=3	11.6	13300.6	5936.75	P62854	3	40	0	RS26_HUMAN		1196		2386	5135.5	2861
Heat shock protein 105 kDa OS=Homo sapiens OX=9606 GN=HSPH1 PE=1 SV=1	5.11	97777.6	5934.04	Q92598	30	40.91	0	HS105_HUMAN	22417.3	20446.3	13603.7	27672	31172.3	29319.7	27708.3	29225.3	41705	32021.3	37905.7	23180.3	29956.3	32037.7	35025.7	13561.7	12173.3	12430.3	10514.7	10595	12557.7	37861.3	39908	46946.7	60884	34271.3	49058.7	38079	43163.3	46629.7	22539.7	45339.3	39404	28634.7	26843.3	11464.3	20893.3	11989.7	19705.3	14191.3	11431
Heterogeneous nuclear ribonucleoprotein R OS=Homo sapiens OX=9606 GN=HNRNPR PE=1 SV=1	8.24	71228.3	5932.2	O43390	26	44.87	0	HNRPR_HUMAN	1815.29	1619.86	2967.81	40604	39767.2	36158.5	25956.3	27095.5	26878.5	8177.96	8622	9354.09	6283	6411.84	7319.79				5524.59	5896.99	4449.47	42185.2	43107.4	40119.2	34117.4	30720.7	29304.5	32338.6	31047.4	26670.5	20237.7	20634.2	16583.8	5512.3	3969.14	3703.76				4682.79	4810.29
Zinc finger Ran-binding domain-containing protein 2 OS=Homo sapiens OX=9606 GN=ZRANB2 PE=1 SV=2	10.66	37860.7	5923.66	O95218	12	29.09	0	ZRAB2_HUMAN	23827.7	20169.7	22048	12244.7	11851	18147.7	14658	13176.3	20406.3	14994.3	24431.3	16239	26049	22798.3	38315.3	27424.3	25391.7	36035.7	26007.3	32577.7	45710.7	11487.3	8858	9689.67	13403.3	9190.33	8496	16602.7	12396	13653.7	14363	11212.7	16296.7	21312.7	19728.7	16915	27666	28234	26141.7	20819.3	18297.3
Arginine--tRNA ligase_ cytoplasmic OS=Homo sapiens OX=9606 GN=RARS PE=1 SV=2	6.27	76177.5	5923.64	P54136	29	46.82	0	SYRC_HUMAN				27744	29056	30821.3	14033.7	12724.3	14389.7	3932	4438.67	3241			2903.33						2862	33935.3	33644.3	29610.7	22761.3	33253	31403	9491.67	6660	8355.33	1965	3626.67	4326	4604.33	4021		4590.33	4625	4248.67	4218
Poly(U)-binding-splicing factor PUF60 OS=Homo sapiens OX=9606 GN=PUF60 PE=1 SV=1	5.02	60046.7	5917.39	Q9UHX1	22	60.29	0	PUF60_HUMAN	16509	13779.3	14680	23085.7	25399.3	28060.7	24189.3	27012.3	30248.3	21106.3	23247.7	21424.7	18300	17183.3	18495.7	10533	8195	9719.33	8258	7463	11780.3	25441.7	25919.7	33500.3	29873.3	33237.3	21553.7	32505.7	18330.3	22475	38416.3	35833.3	32454.3	27133	23668	22808.7	13407.7	10970.3	11683.3	8415	6648.33
GMP synthase [glutamine-hydrolyzing] OS=Homo sapiens OX=9606 GN=GMPS PE=1 SV=1	6.45	77456.9	5915.48	P49915	35	63.2	0	GUAA_HUMAN	7933.67	7148.67	7337.67	34061.3	33103.3	36724.7	33796.3	34529.3	37729	21069.3	23618.3	23019.3	8949	7912	6850	11147.7	9281.33	9342.67	9317.33	12092.5	8468.33	25330.3	26085	26024.3	24799	21568.7	20869.7	26347.3	25420	26773.7	14437.3	13902.3	16934.3	11217.7	9227.33	10695	9257.33	7222.67	9614	6261	3944
Heterogeneous nuclear ribonucleoprotein Q OS=Homo sapiens OX=9606 GN=SYNCRIP PE=1 SV=2	8.86	69830.8	5904	O60506	30	50.4	0	HNRPQ_HUMAN	9316.47	45060	46325.7	62989.4	44850.5	44179.3	55941	34554.9	33699.9	58908.3	24265.3	59158.7	44719.3	42718	8473	44309	42977	8404.67	10910.7	29613	10685.5	34670.2	31346.6	29681.1	25176.6	24546.6	24337.5	39041.8	37889.1	33933.5	47528.7	38641.8	37650	11964.9	9512.79	8566.42	10074.7	8325.33	7916.33	4945.71	5034.48
Glutamate dehydrogenase 2_ mitochondrial OS=Homo sapiens OX=9606 GN=GLUD2 PE=1 SV=2	8.61	61776.3	5884.27	P49448	20	43.19	0	DHE4_HUMAN				5119.69	5581.4	6342.36	8257.64	8016.69	8453.61	4806.95	5316.42	4829.01	18950.9	19912.6	20494.1										4336.12	3953.21	3993.54													5351.5	5523.5
Peptidyl-prolyl cis-trans isomerase NIMA-interacting 1 OS=Homo sapiens OX=9606 GN=PIN1 PE=1 SV=1	9.26	18357.4	5875.79	Q13526	6	43.56	0	PIN1_HUMAN	6655	5571	7343	18581	19091.3	23637	11779	12455	18976	11510	12263	10673	5874.5	5617.33	6276	6622	6874	6885	9709.5	7832.67	8848.33	16841.3	16724	15806.7	14003	12900.3	12317.7	20472.7	17800.3	13188	14745.3	14910	13873.3	12941.3	10251.3	8809.5	7055	6646.67	6299	8447	6906.5
Mitochondrial import inner membrane translocase subunit Tim8 A OS=Homo sapiens OX=9606 GN=TIMM8A PE=1 SV=1	4.86	11226.5	5861	O60220	2	22.68	0	TIM8A_HUMAN	27828	30864	32763	16982	17169		19472	21501	21007	27412	29690	29292	23747	20351	22568	31720	38422	35905	42150	48618	41403	28984	30494	27148	33736	36921	31876	39676	33313	23513	60596	61433	35473	47919	30904	61190	9618	11282	20686		1646
Cullin-associated NEDD8-dissociated protein 1 OS=Homo sapiens OX=9606 GN=CAND1 PE=1 SV=2	5.42	138087	5857.09	Q86VP6	44	37.07	0	CAND1_HUMAN	82314.3	91066.3	87885	69174.3	74006	70961.7	74130	78121	75620	86915.3	87316.3	97155.7	98378	100412	97533.3	28683	26752.3	22361	22939	25198	13704.3	56101	54707.3	53178	46380	76109	67801.3	60160	59143	52403.3	73817.3	67130	67811.3	60391.3	57899.3	55476.3	34850.3	36340.3	37815.3	13514.7	14157
UMP-CMP kinase OS=Homo sapiens OX=9606 GN=CMPK1 PE=1 SV=3	5.27	22450.5	5842.31	P30085	11	61.73	0	KCY_HUMAN	12421	10547.7	14324	34252.7	35293	41536.7	27020.3	28488	33292	21185	24760.3	21534.7	7367.33	9963.67	11294.7	14515.3	14480	15141	15730.7	13705.7	18389.7	20859.7	24035	26251	23329.3	19937	21030.7	24746.3	24202.7	24410.7	18430	13894	20701	18261.3	11071.3	12666	9846.67	11485.3	12447.7	13287	8140.33
Calmodulin-like protein 3 OS=Homo sapiens OX=9606 GN=CALML3 PE=1 SV=2	4.1	16947.8	5816.32	P27482	7	48.99	0	CALL3_HUMAN	4020.58	3896.79	4142.41	5376.14	5091.69	6425.41	4409.38	3930.9	5440.74	4337.02	3858.15	4058.01	6063.34	5809.4	5841.67	7885.74	7118.9	6320.49	8663.95	8207.48	7178.58	15317.6	12337	16118.2	8235.34	6959.72	6156.33	3285.43	3666.87	2838.97	7602.6	9521.42	30743.6	40556.5	14750	5788.68	14759.4	8669.7	9549.97	14467.9	9688.45
60S ribosomal protein L26-like 1 OS=Homo sapiens OX=9606 GN=RPL26L1 PE=1 SV=1	11.23	17256.3	5805.96	Q9UNX3	7	39.31	0	RL26L_HUMAN																									8389.94	7320.69	12763				27034	18750.5	31555.5				16221	17903.5	33352.5	15164.2	16481.8
Dihydropyrimidinase-related protein 2 OS=Homo sapiens OX=9606 GN=DPYSL2 PE=1 SV=1	5.95	62749.9	5786.29	Q16555	25	62.41	0	DPYL2_HUMAN	17739.3	18866.7	19585.7	27898.7	27244	27644	27846.7	29026.7	27607.7	29267.7	28795	31076.3	21668.3	20873.3	20145.3	12756.7	14129.7	12248.3	7725	8347.33	8091.67	22486.5	22062	20853.3	21913	21030.3	21210.3	24357.5	21247.4	21207.3	21024	24486.2	23676	19810.3	15997.6	14164.4	14604	13485.4	14044.6		1681.96
Nuclear transport factor 2 OS=Homo sapiens OX=9606 GN=NUTF2 PE=1 SV=1	4.96	14649.6	5781.31	P61970	3	24.41	0	NTF2_HUMAN	64821.5	68180	70060	33437	34132.3	31256	31949.3	33715.7	30181	46420.3	45245.3	42389	44264.7	44598	41724.3	81100	53756.3	46564	64948.5	56970.7	49235.7	31519	32081.7	31727	29686	28515.3	28026.7	47668	48001.5	47254.5	59743.5	38763	50738	63646.5	61905	43028	79468.5	84888	73767	68516.5	63125
ATP-dependent Clp protease proteolytic subunit_ mitochondrial OS=Homo sapiens OX=9606 GN=CLPP PE=1 SV=1	8.11	30465.3	5777.07	Q16740	12	48.01	0	CLPP_HUMAN	28361	23041	25364	17332.3	17811.3	20040	16966	16241.7	18617.3	22452.7	27299.7	23162.3	22328.7	22041	25195.7	8435.33	8767.33	9235.67			3811.5	33272	30654	32597	22154.7	20129.3	21934.3	30664	29749.3	31452.3	44362	40023	41484.7	45582	51433.7	47602.3	31157.7	30350.3	36239	7048	7327
Poly [ADP-ribose] polymerase 1 OS=Homo sapiens OX=9606 GN=PARP1 PE=1 SV=4	9.31	113882	5710.23	P09874	40	43	0	PARP1_HUMAN	20814.3	18996.3	21290.3	85233	77340.7	91455	72425.7	75166.3	77433.3	43559.3	50065.7	47044	22942.3	22120.7	21520.7	13320	13201.3	13885.7	21399.3	20556.3	21227.7	74001.7	76484.3	82999.7	58818	52953	99762.3	53225.3	39368.3	56216.7	13828	29345.3	42398.7	37625	32237.7	29035.7	23122.3	21743	19878	18660.3	21097
N(G)_N(G)-dimethylarginine dimethylaminohydrolase 1 OS=Homo sapiens OX=9606 GN=DDAH1 PE=1 SV=3	5.45	31464	5708.38	O94760	19	52.28	0	DDAH1_HUMAN	49702.3	49199.3	52149.7	44079.3	37024.7	42471.3	44329.7	41350.3	43000	54890.7	52294.7	52235.7	39248.3	38748	42179.7	19461.7	18253.7	18973.3	14675.7	13305.7	14849.7	17225.3	14436.3	29238.7	8816	10210.3	9986	27810	24480	36006.7	28904.3	23179.7	35121	41850	33097.7	58520	29307	22724.3	21904.7	10039.7	12888.3
L-xylulose reductase OS=Homo sapiens OX=9606 GN=DCXR PE=1 SV=2	8.13	26198.2	5705.18	Q7Z4W1	9	36.48	0	DCXR_HUMAN	20260.3	20316.7	19025	20318	21306.3	21206	19122.3	21142.7	19480.7	27443.7	27885	26602.7	11863.3	11260	12856	5098.5	5376.5	4890	3647	3474		39758.7	38882.3	38274.7	34803	31248.3	34667	40474.7	43915.3	36510	49580.7	47208.7	41049	34493.3	38240.3	24673.7	18656.7	18084.7	17990.7	9325.5	8198
Charged multivesicular body protein 5 OS=Homo sapiens OX=9606 GN=CHMP5 PE=1 SV=1	4.48	24627.8	5690.82	Q9NZZ3	6	25.57	0	CHMP5_HUMAN	21965.5	17289.3	17206	14809.7	15332	15223	13868	15079	16918.3	15736	17825.3	16121.3	19336.7	19661.3	20525.7	19424.7	22244.3	23006.3	22053.7	25611.7	25139.3	13317.7	13129.7	13166	12051.3	7746	7089	16071.3	14578	17558	15839	18880.3	16028.7	17089.7	16214.3		21775	23382	23077	29604.5	30809
Protein CDV3 homolog OS=Homo sapiens OX=9606 GN=CDV3 PE=1 SV=1	6.04	27334.9	5685.29	Q9UKY7	16	76.36	0	CDV3_HUMAN	11518.7	9923	11161	19619.7	25623	28710	9120.33	20687.3	20039.7	18470	21286	10721.3	12234.3	10986	14658	15455.7	14945.3	19566	20119.7	18207	22903.3	12996	11396	12810	15469.7	24241	26480.3	16101.3	14257.7	17082.3	14812.3	20243.7	20853.3	24103.7	23221.3	24317.3	24692.3	22767.3	24698	22080.7	27757.7
Serine--tRNA ligase_ cytoplasmic OS=Homo sapiens OX=9606 GN=SARS PE=1 SV=3	6.04	59290.6	5663.64	P49591	22	48.83	0	SYSC_HUMAN	8220	8769.67	10542.5	44632	43766.7	41049.7	44341.3	46798.7	44130.3	39106.7	36390.7	41519	6841	6812.33	6597	3650	3328.33	3784	4546.67	3849	4178.67	25788.3	26460	27885.3	29196.3	25913	24284.7	33705.7	32006.3	32390.3	29829.7	27640.3	31491.7	13842	11160	10676	5307.67	8225	7461.67
Far upstream element-binding protein 1 OS=Homo sapiens OX=9606 GN=FUBP1 PE=1 SV=3	7.45	67731.6	5660.33	Q96AE4	28	53.88	0	FUBP1_HUMAN	71185	70754.7	73671.3	52372.7	51799	56060	54558	51302	56305	58333.3	61571.7	59963.3	79620.7	77510.3	81150	95277.7	89708.3	87650.3	90263.3	88064.7	108409	39102.3	38006.3	43592	40148	36408.3	38420.3	55827.3	53397.3	55998.3	67802	62620.3	62288.7	75772	83406.3	66850.6	87024.7	97856	103242	101612	101132
F-actin-capping protein subunit beta OS=Homo sapiens OX=9606 GN=CAPZB PE=1 SV=4	5.21	31635.7	5649.87	P47756	9	30.32	0	CAPZB_HUMAN	44240.3	42518.3	45887.3	53380	57173.7	48040.3	44750.3	48250.7	48290.7	50933.7	53477	54027.3	34833	34017.7	29510	26100.7	24092.7	25255.3	17250	18425	19257.3	41189.3	54003	53646.5	27179.3	25975.3	34476	42717.7	58211.5	42705	56427	42947.7	43670.7	54268.3	47087.3	49547	45935.3	45036	53222.5	17966.5	15488.3
Myosin light chain 6B OS=Homo sapiens OX=9606 GN=MYL6B PE=1 SV=1	5.43	22878.1	5648.2	P14649	7	27.4	0	MYL6B_HUMAN	10903.2	12339.7	11491.4	7816.71	7552.51	10193	8823.31	8267.36	12034	6935.4	7498.74	6327.66	7953.58	8037.87	9598.81	7734.02	6883.43	8175.54	7179.02	6748.17	9068.04	16297.5	16604.1	16229.6	28429.8	26107.9	25500	13736.6	13383.2	12823.9	11422	12140.4	9071	9010.49	8783.49	3797.09	11400.6	8103.73	7962.23	11983.7	11297.4
Cytochrome c oxidase assembly factor 6 homolog OS=Homo sapiens OX=9606 GN=COA6 PE=1 SV=1	8.28	14458.3	5641.9	Q5JTJ3	1	11.2	0	COA6_HUMAN	17156	15848	17071	8713	8895	11656	10562	9435	11884	9771	12354	9905	20928	19790	27419	17038	16213	20984	27141	27305	38508	16764	16217	15593	8742	10753	10608	21895	23288	19079		30758	24631	27698	38854		34816	43320	49192	36822	59034
Drebrin-like protein OS=Homo sapiens OX=9606 GN=DBNL PE=1 SV=1	4.82	48492.5	5641.38	Q9UJU6	18	42.79	0	DBNL_HUMAN	4895	4478.5	4091	15868.3	14386	20549.7	13248.7	12868	18827.7	7370.33	10771.3	7749	5329.33	4765.33	7187.33	5906.5	5066.33	7081.33	6772	5788.67	10402.3	19472.3	18475.7	18919	17575	18533	18774.3	19511	19826.3	18553.3	14675	15277	14311	15409	15573	12904.7	15384	16182	16677	16723	17215.3
Alpha-galactosidase A OS=Homo sapiens OX=9606 GN=GLA PE=1 SV=1	5.22	49508.2	5634.59	P06280	15	35.66	0	AGAL_HUMAN	23905	25922.7	30458	37746.3	35828	36595.7	37165.7	35781.3	33720.7	38863.7	40067.7	44377.7	33127.7	31770.7	25343.3	22372.3	19326.7	16699	17235.3	16813	14591.3	90475	82842	93988.3	82722.3	73512.7	77211.3	71284.7	60858.3	73117	68605.7	79363	98032	83323.3	67115.7	52625.3	44743.7	37562	56351	14005	13962.3
60S ribosomal protein L26 OS=Homo sapiens OX=9606 GN=RPL26 PE=1 SV=1	11.23	17258.2	5594.72	P61254	8	44.83	0	RL26_HUMAN	50229	45519.3	29269.3	23577	42625.7	35922.3	37606.3	38005.7	38103.7	47747	42096	48827.3	32937	46345.3	45673.7	44998	43689	40906	35703.7	45660.7	44038.7	27218	26555.7	31123	8389.94	7320.69	12763	26305.3	24900.3	25689.7	27034	18750.5	31555.5	24797.7	48248.5	2188	16221	17903.5	33352.5	15164.2	16481.8
Proteasome subunit beta type-7 OS=Homo sapiens OX=9606 GN=PSMB7 PE=1 SV=1	7.65	30307.7	5545.08	Q99436	12	52.71	0	PSB7_HUMAN	51957.7	50964.3	52184.3	39622	38069	47210.3	38435.3	38894.7	46246.7	50439.3	59552.3	51989.7	60203.3	58517	69133.3	79556.7	75423.3	87109.3	77617.7	83971.7	92370.3	40780	42397.3	40250.7	33766.3	31625.3	32165.7	51966.7	50754.3	49701.3	67250.7	58665	56506.7	69556	67247.7	61978.7	71758.7	71246.7	71448.7	86284	81089.3
Splicing factor 3A subunit 3 OS=Homo sapiens OX=9606 GN=SF3A3 PE=1 SV=1	5.11	59191.2	5530.14	Q12874	27	57.88	0	SF3A3_HUMAN	10280	9054	9204.67	43150	46806.3	53657	39554.7	41783.3	43203.7	29261.3	30760	32481.7	18799	17693	17648.3	12007.7	12698	12697	12156	11622.3	14480	58775.7	56104	64110.3	59775.3	56824	54985.3	53661.3	53951.7	56898.3	48203.3	44084.3	50817.7	28516	23800.7	20202.3	23237.3	18616.7	25354.7	17507.3	19770.7
26S proteasome non-ATPase regulatory subunit 12 OS=Homo sapiens OX=9606 GN=PSMD12 PE=1 SV=3	7.59	53303.7	5525.65	O00232	23	51.1	0	PSD12_HUMAN	12221	9598	9147.33	26198.7	27239.3	30621.3	28149.7	26777.7	31726	17843	20228.7	17813	7851.33	9086.33	10850	8026.5	11563	6504			4438.33	27468	26894	23565.7	21263	20530.3	22358	22933	23820	20517.3	38527.7	18708	14614	11531	16585.3	36995.7	9329.67	13321.7	15005	6757	6112.33
Proteasome subunit beta type-6 OS=Homo sapiens OX=9606 GN=PSMB6 PE=1 SV=4	4.61	25585.9	5521.12	P28072	10	69.46	0	PSB6_HUMAN	109317	111821	107155	69504.7	71779.7	68826	73196.3	76789	83106.3	94154	106202	91487.3	111763	109442	109395	130205	123407	134387	134911	145233	157540	61656.3	63678	70693.7	63586.3	51294.3	49741.3	70082.7	73175.7	82994	84613.7	77214.7	90162.7	105303	91723.3	85153.7	126964	104983	108323	144051	124779
Cysteine and glycine-rich protein 1 OS=Homo sapiens OX=9606 GN=CSRP1 PE=1 SV=3	8.56	21422.8	5507.1	P21291	4	25.91	0	CSRP1_HUMAN	7868	7105	6519	7083	9986	7088	6907	8655	11774	18419	14386.5	11820	10920	6436	11209.5	8432	6605	8518.5	9983	9279.5	12556.5	6047	4252	5896		13327.5	32663	9722.5	9358	8085	5958	17745	8416	10764	9546	3937	6098	14880.5	9568		3968
Gamma-glutamylcyclotransferase OS=Homo sapiens OX=9606 GN=GGCT PE=1 SV=1	4.88	21235.9	5492.58	O75223	9	68.62	0	GGCT_HUMAN	40783.3	38168.3	40053.7	36426.3	38700	38776	37331.3	42197.7	42777.7	50512.3	55567.7	53990.7	46022.7	48925.3	52426	18946.7	18303	19298.7	15193.7	15389.7	15076	20680.3	21413.7	24224.3	25244	25022.3	23463	33455.7	35460.7	32218.3	39132	40832.7	37704.3	36451.7	44215	27489.3	23368.7	16874	21683.7	13989	12989.5
Keratin_ type I cytoskeletal 15 OS=Homo sapiens OX=9606 GN=KRT15 PE=1 SV=3	4.51	49439.9	5482.83	P19012	17	44.08	0	K1C15_HUMAN				4205.06	4307.22	4950.39				7314.28	7602.49	7249.73	14876.1	15653.8	16202.4	6784.11	6322.96	6956.79	14961.4	14889.2	14918.4	11355.5	12488.3	8213.56	5949.42	7171.68	7845.16	14796.5	15589	16225.8	10547.3	12581.6	10244.5	15676.3	14440.3	4533.98	18419.6	15169.2	16394.4
Destrin OS=Homo sapiens OX=9606 GN=DSTN PE=1 SV=3	7.84	18962	5470.38	P60981	7	47.88	0	DEST_HUMAN	12250.5	11129.6	12723.3	20307.4	24135.2	29997	21451.7	24113.1	27200	20591.1	28845	24748.2	13123.5	13289.7	12558.7	1359.43	1162.29	2740	5648.5	4684.53	5912.33	22831.7	21412.3	18599.7	15207	21377.5	21488	23404.3	23708	21398.7	19208.3	24286	22333	17956	18954	14777	9100	9332.33	10121.7	4896	6615
Acidic leucine-rich nuclear phosphoprotein 32 family member E OS=Homo sapiens OX=9606 GN=ANP32E PE=1 SV=1	3.55	30920.6	5469.35	Q9BTT0	8	27.24	0	AN32E_HUMAN	25907.7	24314	24718.3	35948	37826	37725.3	24202	26079	24555.7	23016.7	23397.7	26105.3	25194.3	24287.3	23020.3	34200	30038.7	28982.3	35307.7	35629	32906.3	23050	23060.7	22871.7	23100	17109.7	17087.3	15715.7	14434.3	15441	14151	11665	13995.7	17567.3	15433.3	16874.5	13484.3	14788.3	13858	18973	7438.5
dCTP pyrophosphatase 1 OS=Homo sapiens OX=9606 GN=DCTPP1 PE=1 SV=1	4.74	18794.9	5467.4	Q9H773	11	50	0	DCTP1_HUMAN	35366.3	31929	32036.7	27527.7	25819.3	29497	27305.7	28366.3	27993.7	30189	32882.3	34460.3	33177.3	31158.7	34106.3	31892	31214	29868.3	29635.3	35275.3	31867.3	24518.3	25002.3	26514.3	24821	20140.3	19897.7	30279.3	27165.3	19812.3	41319	35257	36277.7	40305.3	37881	32523.7	37343.3	38179	51772	28876.7	25355
Heat shock 70 kDa protein 4L OS=Homo sapiens OX=9606 GN=HSPA4L PE=1 SV=3	5.53	95539.2	5452.21	O95757	36	49.7	0	HS74L_HUMAN	4707			24560.7	24404	25675	24298.7	24533.7	23819.7	9104	10283.7	9480	3757	3767.33	6334.67	7513.5	8818	6206	3583.5	3768	4111.33	19838.3	20438.3	20152.7	18987	17213.7	17541.7	18589.7	19315.3	18742.3	10196	10069.7	10235	7949.67	7715.67	7449.67	6916	7045.33	8323	10743.5	11830
U1 small nuclear ribonucleoprotein A OS=Homo sapiens OX=9606 GN=SNRPA PE=1 SV=3	10.49	31279.6	5444.81	P09012	9	35.11	0	SNRPA_HUMAN	39277.3	45578.8	39627.8	22485.7	21619.3	29009.3	19376.8	20560	25320.1	26160.8	34813.3	25896.3	24642.6	29131.7	40755.3	35804.3	32492.1	34989.6	27983.6	29451.9	31866.4	44480.6	45715.6	57709.5	54009.8	44236.2	39565.7	59292.4	55122.1	67216.3	64674.1	61366.5	76554.4	88356.9	75044.7	67955.6	93657.9	80800.3	69940.2	45024.2	43131.7
DAZ-associated protein 1 OS=Homo sapiens OX=9606 GN=DAZAP1 PE=1 SV=1	8.76	43611.6	5441.52	Q96EP5	8	25.31	0	DAZP1_HUMAN	11970	10965	11551.7	15688.3	15144.3	20985.3	13631.7	12922.3	19679	14796.7	19493	13919	13624.7	13343.3	20676.7	10489.7	10104	16026.3	10914.3	12132.3	13816	31853.7	31989.7	31622.3	30176.7	27328.7	29291	35771.3	28583.7	33035.3	41554.7	44621	38970	40051.3	48305	43665.3	38209	41787.7	41667.7	26521	27792.7
Dihydrolipoyllysine-residue succinyltransferase component of 2-oxoglutarate dehydrogenase complex_ mitochondrial OS=Homo sapiens OX=9606 GN=DLST PE=1 SV=4	9.38	49097.6	5435.72	P36957	18	49.45	0	ODO2_HUMAN	67924.3	54121.3	54600.3	34319	31618	30365	35562.7	33300.3	28783.7	29352	33977.7	41028.7	59902	51648.7	46198	98299.3	76916	77588.3	87331.7	87333	82318.3	40086.3	39356	36522.7	35494.3	38517.3	38460.7	41131	46019.3	38936.7	49362.7	54896	51370	57729.3	53065.3	56394	60938	59810.3	60304	54717.7	45750
Matrin-3 OS=Homo sapiens OX=9606 GN=MATR3 PE=1 SV=2	5.84	95136.6	5423.13	P43243	34	41.79	0	MATR3_HUMAN	17574	15524.5	16475.5	27319.7	26809.7	33021	24091	24239.3	31938	26344.5	24588	27627.5	20278	19437.5	18374.3	12173	10920	15015	12366	15222	10434	59096	58046	53129.3	36777.7	35021.7	34609.3	31257	29786.7	31420	16833.3	16478	16043.7	14395.7	14904.7	12776	9735.67	10274.7	10376	10026.3	10962.7
Peptidyl-prolyl cis-trans isomerase A-like 4A OS=Homo sapiens OX=9606 GN=PPIAL4A PE=2 SV=1	9.76	18409.9	5408.81	Q9Y536	4	16.46	0	PAL4A_HUMAN							6063.31	6120.51	3398.19													7804.47	5732.02	7689.12	11806.5	7960.71	7019.35	3434.41	6102.18	5737.89	4127.78	4987.21	3884.93	3501.22	3659.49		8324.2	7503	3719.27
Prefoldin subunit 1 OS=Homo sapiens OX=9606 GN=PFDN1 PE=1 SV=2	6.42	14210.5	5401.64	O60925	6	59.84	0	PFD1_HUMAN	10830	10618.3	11912	12348.3	12374	15460.3	12377	11843	12438.3	12625.7	16179.7	16875.5	13575.7	16398.7	16611	10702.5	9283.67	9576.67	11753.5	11655	9946	11623	11097	14445	13106	7840	10292.7	16625	11708.5	16775.7	18368	20336.7	23629	20734.7	23689.7	16795.3	19666.3	23614	23524	13157	18869.5
26S proteasome non-ATPase regulatory subunit 2 OS=Homo sapiens OX=9606 GN=PSMD2 PE=1 SV=3	4.9	100941	5378.67	Q13200	45	53.96	0	PSMD2_HUMAN	13513.7	16454	16055.7	48609	51066.3	47546	45306	44868.7	47187	25510.7	26535	27177.7	15606.3	18629.7	18442.3	13162.7	14320	13475	19596.7	20193.7	17728.7	42483.3	41904.3	43284	40434.3	48175.7	48765.3	33496	34607	34391	22989.3	25036.7	25500.7	19234.7	19561.3	15771.3	17321.3	14863	17060.7	16685.3	14452.7
26S proteasome regulatory subunit 10B OS=Homo sapiens OX=9606 GN=PSMC6 PE=1 SV=1	7.29	44458.2	5373.92	P62333	19	55.01	0	PRS10_HUMAN	138005	123137	137071	191863	179923	156149	152077	144448	160047	170678	148558	186970	145071	164966	131914	95664.3	97115	85129	141208	4778.33	110068	53956.7	55225.3	47872.7	40721	38762.3	38479	46845	48660	42743.7	44334.3	49424.7	42218.7	43087.3	46927	51707.5	43711	50532	46781.7	38417.7	46527.3
60S ribosomal protein L18 OS=Homo sapiens OX=9606 GN=RPL18 PE=1 SV=2	12.22	21748.6	5370.67	Q07020	5	28.72	0	RL18_HUMAN	21863.5	20259	19356	44466.5	30616.3	48599	45433	46071.7	52079	27872.5	34556.3	32793.5	18805.5	18558.5	18916.5	11746	9492	7073	33007	33676.7	31328.7	6761	6542	6883	9112	3278	7813	10456	10275	4827	5298	4437	3951.5	4145							8053
Ras-related protein Rab-11B OS=Homo sapiens OX=9606 GN=RAB11B PE=1 SV=4	5.56	24602.6	5360.28	Q15907	8	44.95	0	RB11B_HUMAN	17937.7	17204.7	21983.7	23316	22803.3	19668.7	24243.7	24298.7	21756.7	30775.3	27384.7	34242.3	17922.3	14509.3	17019.3	6098	6875	7972.33	4887	6260.5	6537.5	15670.7	16042.7	14056	14635.3	14706.7	11668.3	12069.3	15190.7	14126	21013.7	14915	13089.7	14870.7	13451.7	8477	10665.7	8825.33	11130.7	15393	21537
Probable ATP-dependent RNA helicase DDX5 OS=Homo sapiens OX=9606 GN=DDX5 PE=1 SV=1	9.18	69661.4	5357.25	P17844	27	37.46	0	DDX5_HUMAN	11487.4	11015.5	7709.71	21871.2	24371	22360.7	23437.6	22844.9	19305.7	8565.64	7329.87	8579.07	2209.69	3496.91	3683.75	8886.46	8539.65	10278.9	10966.3	10718.7	9676.54	32934.4	35669.1	33279	29922.8	27654.1	28384.5	23319.1	22487.2	23198.2	9480.86	9009.69	9380.46	10265.2	9032.95	9368.58	8330.14	8073.28	8799.53	9266.07	9037.17
Importin-5 OS=Homo sapiens OX=9606 GN=IPO5 PE=1 SV=4	4.65	125113	5356.79	O00410	28	32.18	0	IPO5_HUMAN	15812.3	14965.3	16091.7	33206.8	30467.2	37562.9	32666	35960.1	38965.3	40674.9	41751.5	40790.5	20548.5	21090.7	20412.2	4368.73	3600.09	4493.8	5665.01	4801.14	5830.31	29943	28404.6	24858.7	25453.7	25376.9	28317.6	32803.5	31220.1	27454.1	27795	31656.5	24416.8	19290	21392.7	18716.3	9639	11217.3	10544.7	5593	5838
Fatty acid-binding protein 5 OS=Homo sapiens OX=9606 GN=FABP5 PE=1 SV=3	6.82	15506.6	5350.49	Q01469	5	20	0	FABP5_HUMAN	26156.3	24313.3	34669.5	17944.3	16879.3	25743.3	16794	14464.3	22899.7	24643	32621.7	25857.7	28417	25840.3	32493.7	25337	25283.3	27751.3	22422	25031	23805	9949.33	10343	14251.3	11822.3	8923.33	10120	14749	17516	18213.7	17743.7	21289.7	25106.3	29654.7	28199.3	26326	22973.3	25145.7	23446	17773	16992.3
ATP-dependent RNA helicase DDX1 OS=Homo sapiens OX=9606 GN=DDX1 PE=1 SV=2	6.84	83401.7	5329.81	Q92499	26	43.78	0	DDX1_HUMAN				35173.7	35814.3	35755.3	34551	37356.3	37219.3	15855.7	15317	16298	7706.5	6932.67	7604	3900	3667	4542.67	3784	4628	6473.5	26962.3	27992	27089.3	26967.7	24102	23183.3	27092.7	25563.7	28434.3	20235	14280.3	14909.7		4605	5654	4980			10008	8068
DnaJ homolog subfamily A member 1 OS=Homo sapiens OX=9606 GN=DNAJA1 PE=1 SV=2	6.7	45609.6	5316.71	P31689	16	43.07	0	DNJA1_HUMAN	5596	4772.5	5475.67	16229.3	16055.7	17146.7	13492.3	13312.7	14786.3	9805.33	9270.33	12339.3	6821.5	6360	6084.33		3158	3319	3844	3426	3214	31734.3	30252.7	31891.7	25938.3	19466.7	27635	30204.3	29299.3	29293.3	20300.7	27882	27438	25267.3	26016.3	19514.7	15255	12409.3	16945	5852.33	10907
Glutathione peroxidase 1 OS=Homo sapiens OX=9606 GN=GPX1 PE=1 SV=4	6.18	22223.3	5310.41	P07203	7	36.95	0	GPX1_HUMAN	36058.3	35466	36398	28936	26375.3	26460.3	24856.3	24107	24520.7	30353.7	32334.7	31234	36846.7	28240.3	39024.3	41055	40072	41001	37659.3	38969	37890.7	27969	25570.3	27979	18918	15859.7	18051.7	28869.7	28370	29188	38160	32789	34084	41471.3	42420.3	44763.7	44241.7	40360	41617.7	31902.7	31675.7
Tubulin beta-8 chain OS=Homo sapiens OX=9606 GN=TUBB8 PE=1 SV=2	4.6	50289.4	5294.69	Q3ZCM7	11	25.68	0	TBB8_HUMAN	5348.92	4957.26	4682.58	14004.7	13658.3	9392.25	14089.6	14027.9	10034	10400.3	10682.2	10341.3	5615.7	6135.27	5316.05	2865.77	2925.37	3794.91	2791.23	3743.96	2699.21	14732	14667.6	13244.7	5535.63	5081.89	4838.46	26364	24351.2	19579.9	16756.1	18992	17860.2	12362.5	9170.94	7076.3	12148	8122.39	12180.9
Leucine--tRNA ligase_ cytoplasmic OS=Homo sapiens OX=9606 GN=LARS PE=1 SV=2	6.96	135664	5294.63	Q9P2J5	48	43.79	0	SYLC_HUMAN				34428.7	35688.3	34103.7	13174	13095.7	12392.7	4108.67	5483.33	3949.33			4481.67			4286	3845	3435	3466	38620.7	37486	34525.7	27134.3	28166	27771.7	9850.67	9997.67	8145.67	16551.3	20789.7	19935.7	16000.3	13085.7	11731	6394	7318.67	6894.33
Polyadenylate-binding protein 4 OS=Homo sapiens OX=9606 GN=PABPC4 PE=1 SV=1	9.73	71125.2	5287.48	Q13310	24	42.7	0	PABP4_HUMAN	6342	8908	5920	22199.7	23551.3	25648.6	17350.4	18264.1	17924.8	9504.3	9776.85	10150.8	5243.67	3457.29	5442.33	5104	4112	2904.5	4484.18	4010.57	3239.53	11321.8	11582.3	12123.8	9883.4	8564.72	9107.97	12640.9	12815.6	14398.2	7059.39	7558.27	7907.32	5567.32	4664.06	2616.93	2314.03	3389.76	3706.92		2989.91
1_2-dihydroxy-3-keto-5-methylthiopentene dioxygenase OS=Homo sapiens OX=9606 GN=ADI1 PE=1 SV=1	5.32	21555.5	5265.63	Q9BV57	11	66.48	0	MTND_HUMAN	29232	28878	26712.7	21645	23040.7	25608.3	24024.3	21123.7	26915.7	25510.7	28103	24486.7	34239	30463.3	31990	29155	26972	28192	35372.3	32162.7	35532	18706	18798.7	15107.7	15772.3	16203	16815.3	17655.3	20262.3	15826	22168	24766	18735.7	17996.3	26357.3	7257.5	13903.3	21567.3	23090.7	20712.5	37387
Nucleolar RNA helicase 2 OS=Homo sapiens OX=9606 GN=DDX21 PE=1 SV=5	9.9	87857.8	5259.62	Q9NR30	31	45.98	0	DDX21_HUMAN	9337	7552	7360	20755.7	18329	21982.7	17180.3	16179.3	17104	5462.5	6652.33	5013.5	7770.33	5989.33	7669.67	5384	6135.5	8076.33	6872	5394	8912.33	17872.3	18128.3	16861	21223.3	22834	23066.3	14598.3	15211.7	13500.7	8047	15464	14579.7	11050	16218	7787.29	20789.7	17323	18951	14085.3	14792
Cathepsin D OS=Homo sapiens OX=9606 GN=CTSD PE=1 SV=1	6.12	45065.5	5232.33	P07339	15	39.81	0	CATD_HUMAN	31730	29159	30884	26771.7	28413.3	29853.3	25930	26965.3	26888	29148	30776.7	35073.3	24712.7	23709.3	25225.3	25265.7	24363.7	25692	17860	18931	19492	37673.3	37525.3	38836	31678.3	29118.7	27692.7	45041.7	42962	40455	50403.3	43892.3	50950	57297.3	50610	54376	44074.7	47212.7	47994	16812	16764
Ubiquitin-conjugating enzyme E2 variant 2 OS=Homo sapiens OX=9606 GN=UBE2V2 PE=1 SV=4	8.55	16419.8	5210.02	Q15819	9	60.69	0	UB2V2_HUMAN	12642.3	10313.2	9046.61	13859.6	15459.5	16580.5	18997.9	20800	19909	15253.1	15583.5	16116.3	15716.5	21961.9	19045	6255.31	5135.69	6204.47	4899.07	5392.49	6290.24	12505	12019.4	12419.4	8536.46	7600.49	7706.35	15684.6	14127.7	14673.1	20751.1	19053.2	16670.5	15935.5	19010.2	17705.1	9162.58	10563.1	9535.24	3179.91	3867.94
NEDD8-conjugating enzyme Ubc12 OS=Homo sapiens OX=9606 GN=UBE2M PE=1 SV=1	7.71	21185.1	5199.3	P61081	7	30.6	0	UBC12_HUMAN	17804.7	17320	16128.3	28153.3	28924.3	26692	28929.3	26924.7	26785	23365.7	24480.7	24939	13777.3	13228.3	10636.3	7384	7772	8461.67	7758	8290	7171	22920	21754.3	26006.3	23937.7	17499.7	11341.7	27540.3	26820.7	26707	23772	23663.3	24369.7	16744.7	15848	14792	13264.3	12002.7	12528.3	5637.67	7578
ATP-dependent RNA helicase DDX3X OS=Homo sapiens OX=9606 GN=DDX3X PE=1 SV=3	6.8	73642.7	5194.53	O00571	30	46.37	0	DDX3X_HUMAN	28579.7	23222.8	23930.4	27636	20277.7	24939.5	27576.4	25595.2	16140.6	13732.2	23614.8	19455.5	27694.4	24460.6	34495.9	9080.04	8614.6	13720.4	5489.93	4864.54	8706.9	35387.8	44302.8	41302.7	38116.6	30357.2	34273.9	38711	35641.8	24731.8	40846.5	41501.2	36750.3	30895.2	16525.2	61288	19809.5	25204.2	27181.9
Copper transport protein ATOX1 OS=Homo sapiens OX=9606 GN=ATOX1 PE=1 SV=1	7.09	7572.73	5191.73	O00244	2	23.53	0	ATOX1_HUMAN	16045	13038	14551	7198	6954	7112	9965	9004	10096	9252	10920	9268	12713	13268	15728	18382	15732	12175	17731	16754	12841	7706	7910	7981	6434	6099	6184	11068	11506	9976	16560	14657	14266	16000	17182		21073	22041	21570	20839.5	21759
Ribonucleoside-diphosphate reductase subunit M2 OS=Homo sapiens OX=9606 GN=RRM2 PE=1 SV=1	5.12	45162.9	5189.21	P31350	18	55.01	0	RIR2_HUMAN	23377	20812.3	22425.7	16785.3	17763	19821.3	21696.3	22404.3	24700.7	22945.3	24809	24600	28226.7	26946	28585	25639.7	23577	27253.3	28614.3	24429.3	29937	23559.7	19519.3	22526.3	25916.7	19007.3	18962	22967	25319	21753.3	32244.3	30278.3	30366.3	30873.3	30336.7	25930.7	21869.3	33238	34217.3	20677.3	22152.3
BTB/POZ domain-containing protein KCTD12 OS=Homo sapiens OX=9606 GN=KCTD12 PE=1 SV=1	5.33	35986	5174.95	Q96CX2	16	66.46	0	KCD12_HUMAN	16362.3	19117.7	21397.7	15664.3	15629.7	15081.7	17412.7	16109.7	16126.3	17648	19449.7	21191.7	19840	18918	18595.7	22747	21579.3	23029	21293	20120.7	19728.3	16474	16537.3	15683	16104.7	11660	12080.7	18055.7	19364	13607.7	21884.7	22664.7	21515.7	19392.7	14744.3	16665.3	13712.5	14741.7	15858.4	9949.5	11241
26S proteasome regulatory subunit 4 OS=Homo sapiens OX=9606 GN=PSMC1 PE=1 SV=1	5.82	49355.7	5168.56	P62191	14	40	0	PRS4_HUMAN	6876	6844.5	6951	30997	33427.3	35796	19217.7	22670.3	23900.7	13551.3	14532.3	12999.7	4298.67	6170	6904.5	5264	4890	6180	5495	5381	5326	25916.7	26080.7	23358.3	20790.3	19969	20606	18889	19196.3	18197.3	17519.7	8839.33	12803	13905.5	13842		13385.5	11156	11320	9364	6669
Septin-11 OS=Homo sapiens OX=9606 GN=SEPTIN11 PE=1 SV=3	6.4	49683.5	5167.83	Q9NVA2	21	45.45	0	SEP11_HUMAN	22592.5	22521	21772	17229.3	16765.7	20382.7	16858.5	17265.3	25883.7	20264.3	23788.3	20988	27124	24847.3	30813.7	18227.6	21427	25525.3	21158.7	21161	23385	19681.7	16901.3	16951	14644.3	13822.3	15528.7	20224	22449.7	20048.7	22646.3	26574.3	22673.7	25867.3	28021.3	29562.3	25556	29283.7	31333	13374.3	13772.7
Serine/arginine-rich splicing factor 6 OS=Homo sapiens OX=9606 GN=SRSF6 PE=1 SV=2	11.92	39700.9	5152.84	Q13247	14	31.69	0	SRSF6_HUMAN	16729.4	14035.3	17658.4	16591.2	16968.9	19405	13125.9	18652	20782.4	9604.61	16932.2	12666.3	12083.5	11498.5	12532.4	11378.4	10442.7	12518.8	11992.7	12293	16225.6	23308.7	23526.2	26208.5	29489	30650.8	25895	27796.2	26268.8	35127.6	39019	24995.9	27297.6	32811.1	30196.2	39033.3	45008.1	31930.6	22298.7	66407.2	59505.6
Leucine-rich repeat-containing protein 47 OS=Homo sapiens OX=9606 GN=LRRC47 PE=1 SV=1	8.28	64043.3	5136.86	Q8N1G4	22	41.85	0	LRC47_HUMAN	16050	16004.3	16793.3	16091.3	16349.3	18971	16826.7	15916	17365	19352.3	16164	19404	15293	15611	7250.67	23304	24772	3842	6876.5	7099.5	4494.5	18286.3	18261.7	17092.7	21879	85247.3	21801	23052	26046.3	16716.3	29690	22347.3	18769	10335.7	12536	15060.7	8359	4887	5624
Keratin_ type I cytoskeletal 13 OS=Homo sapiens OX=9606 GN=KRT13 PE=1 SV=4	4.71	49930.5	5130.19	P13646	26	51.97	0	K1C13_HUMAN	10416.8	10224.3	10038.9	5237.85	5086.21	6824.94	7537.76	7561.37	7934.67	4699.25	5847.72	4850.24	10877.6	12112.2	14943.8	9216.11	8735.68	9814.54	7317.64	7340.56	7750.43	8800.95	9265.8	11625.3	10730	8250.26	8106.73	7409.6	7527	8054.67	5997.22	5741.64	5003.43	7604.28	9171.15	4430.6	10074.5	9077.31	8817.81	13100.1	13323.1
26S proteasome regulatory subunit 6B OS=Homo sapiens OX=9606 GN=PSMC4 PE=1 SV=2	4.91	47480.4	5126.18	P43686	27	70.33	0	PRS6B_HUMAN	15476	13535.7	14422	49459.7	50639.3	49366	43501.7	45557	43033	28599	26347.7	29837.3	15849	16223.3	15082.7	8412.67	7398	8109	6529	7944.33	8962	39414.7	42696	38082.7	39217.3	33203.7	34500.3	30707.3	28771.3	34996	32404.3	32670.7	27793.7	22029.7	27111.7	29012.7	17023	24062	27218.3	11722.7	26616.7
Glycine--tRNA ligase OS=Homo sapiens OX=9606 GN=GARS1 PE=1 SV=3	6.65	83907.1	5124.5	P41250	39	48.99	0	GARS_HUMAN	49654.7	49221.7	50124.3	38178	38866.3	39690	40598.7	41064.7	41931.7	48003.3	49007	47874	53300.7	53252.7	55335.3	45476.7	40396.3	41160	20599.7	21362	19900	32780.3	39245.3	38817.7	34077.7	32528	32932.3	33333	33877	35842.7	43541.3	43381.7	42955	43281	40133	47942.3	41535.7	45229.3	46717.7	8741.33	9211.33
Density-regulated protein OS=Homo sapiens OX=9606 GN=DENR PE=1 SV=2	5.01	22491.2	5120.05	O43583	7	30.3	0	DENR_HUMAN	30774.3	28039.7	33421.7	22961	20617.3	26072.7	23441	21064.3	23753.7	26849.7	27576.7	29629.7	36544	33996	35531.3	26830.3	25306.7	23862	25251.3	23924.3	24166	12631.3	11744.3	11296.3	11524	10853.7	11819.3	14046	20656	20175.5	21958	20448.7	18797.3	20516	27960	25742.7	22047.3	31579	31799	22886.5	23790
Replication protein A 70 kDa DNA-binding subunit OS=Homo sapiens OX=9606 GN=RPA1 PE=1 SV=2	6.98	68765.6	5119.73	P27694	23	51.14	0	RFA1_HUMAN	38015.7	40278.3	39306	35133.7	37006.3	38596.7	35878.3	35597	36668	37474.3	39696	37595.3	28842.3	28825.3	27599.3	24315	25342	26496.3	16630.7	16424	16205	29636	52328.3	32675.7	28682.3	26542	24258.3	31815	33542	34210.3	24304.7	29373.7	32526.3	34783.3	30211.3	21351	29180.7	25314.3	26086	12077.3	10608.3
Glucosamine-6-phosphate isomerase 1 OS=Homo sapiens OX=9606 GN=GNPDA1 PE=1 SV=1	6.49	32839.7	5109.91	P46926	13	56.06	0	GNPI1_HUMAN	40462.3	37479.3	38655.7	26916.3	21892.3	28824.6	26947.6	23286	38678.3	30746.7	29989	34501	37247	35982	34212	55861.3	48980	41577.6	48478	51532	48052	14455.9	12090.3	22022.4	12268	10806.3	13240	19504.3	14848.3	21753.9	18403.7	23594.2	22483.5	23435.1	24971.8	31702.4	26189.7	34521.3	41920.9	20779.3	20739.3
DNA-directed RNA polymerases I_ II_ and III subunit RPABC3 OS=Homo sapiens OX=9606 GN=POLR2H PE=1 SV=4	4.3	17200.4	5092.65	P52434	6	57.33	0	RPAB3_HUMAN	9010	9092.67	7848	14404.3	14526.7	21920.3	13717.3	14115	19782.7	11971.7	16199.7	12854.3	11261.7	11230.3	15147.7	9728.67	9672.33	12994	7331.33	7358	9971.33	24618.7	26551.3	30051.7	24507	18288.7	19099	21047	21579.7	22682.7	13935.7	20063.3	23585.7	29625	28661	31106.5	33884.3	27809.3	33143.3	16936.3	19423.3
Glyoxylate reductase/hydroxypyruvate reductase OS=Homo sapiens OX=9606 GN=GRHPR PE=1 SV=1	7.16	36067.5	5090.52	Q9UBQ7	11	36.59	0	GRHPR_HUMAN	7816.33	9210	8239	24166.3	23396.7	25339.7	24606	23612.3	27710	26319.3	30343.3	27825.7	8919.33	8833	9635.67	6875		5515			3650.33	22365.3	21581.3	17989.7	17877.3	20594.7	20828.7	17787	18444.7	20699.5	12375	20450.7	15740.7	9308.67	8793.5	14726	7450	6190	3925.5	4017	4369
Keratin_ type I cuticular Ha3-II OS=Homo sapiens OX=9606 GN=KRT33B PE=1 SV=3	4.61	47354.2	5089.68	Q14525	15	32.67	0	KT33B_HUMAN																												1931	2465.76	1793.94			1544.54	1640.74			3023.06	3289.54	3715.67	4333.73	4709.5
Keratin_ type II cytoskeletal 75 OS=Homo sapiens OX=9606 GN=KRT75 PE=1 SV=2	7.73	59845.6	5085.18	O95678	21	32.85	0	K2C75_HUMAN	26339.3	25577.4	27382.3	13653.2	13429.4	17069.5	28443.2	28757.1	32121.3	20014.4	24446.9	21484.1	34409.4	34658.1	36193	26026.6	25510.3	25509.3	21529.1	21881.1	22555	20816.5	22490.4	18957.5	29685.9	26559.8	25821.9	15287.3	14040.1	12032	98255.1	23673.2	18356.5	14529.9	19138.5	13354.7	16272.3	22577.7	22393.8	14572.4	17248.7
60S ribosomal protein L29 OS=Homo sapiens OX=9606 GN=RPL29 PE=1 SV=2	12.21	17809.1	5072.81	P47914	2	14.47	0	RL29_HUMAN	9885	7202	8206	7510		3598	2067			3463	2794		2919	3194		15873	13563	9548	8746	11334	10523							2292						5209			5821	7934		9943
Interleukin enhancer-binding factor 2 OS=Homo sapiens OX=9606 GN=ILF2 PE=1 SV=2	5.01	43290.3	5048.79	Q12905	15	52.82	0	ILF2_HUMAN	26198.7	26566.7	31412.7	48772	45771.7	40987.3	46174	43822.3	41104.7	37575.3	36462.3	46126	36464	34893.7	31331	14697.7	13679.7	19317.3	12352.7	8160.67	16007	59921.3	57403.7	61786.7	44085.7	41730.7	42721.7	47804.7	47260	54537.7	66150.3	68725	66202.3	56602.7	61253	52271	37153	38290.7	40605.3	16778	20554.3
Ras-related C3 botulinum toxin substrate 1 OS=Homo sapiens OX=9606 GN=RAC1 PE=1 SV=1	8.58	21849.3	5048.45	P63000	5	17.71	0	RAC1_HUMAN	12290	9850	11844	24176	25068	31004	21657.5	22670.5	29342.5	22193.5	28260	25161.5	4103	2870	5044	3872		4910				44632	32474.4	33015.4	42215	26917.6	26379.3	42952.5	29332.9	48036.5	33757.7	20418.3	33844.5	25443	17573.1	15799.8	16857.5	14326.5	17493.5	5505	5262
Ras-related protein Rab-5B OS=Homo sapiens OX=9606 GN=RAB5B PE=1 SV=1	8.24	23935	5041.51	P61020	8	47.91	0	RAB5B_HUMAN	9123.99	7675.49	8532.15	7356.27	6537.32	7344.41	8203.1	7722.27	8431.45	10477.6	10083.7	10142.3	10051.2	9880.11	9387.18							6860	6711.2	6630.71	6211.69	5707.88	7735.88	5634.15	7279.36	5556.65	5681.25	5546.28	6114.51	4342.11	3536.62	3709.97	3118.56	3275.61	3326.53
Apoptosis-inducing factor 1_ mitochondrial OS=Homo sapiens OX=9606 GN=AIFM1 PE=1 SV=1	9.39	67185.8	5029.18	O95831	23	47.47	0	AIFM1_HUMAN	24067	22235.7	21722.3	5620.67	6491.67	8003.67	4847.67	4412.67	8902.67	7491.67	10892.3	8046.33	23771.3	22676.7	27995.7	16149	14807.3	16481.3	4286.67	6215.33	7956.33	24552.3	22646	24391	31567.3	21504	21678.3	26995.3	28138.3	28002.7	41620	39282	39966.3	56500.7	61589.3	56875.7	61406	63372.7	75082.7	22386	22401
Annexin A4 OS=Homo sapiens OX=9606 GN=ANXA4 PE=1 SV=4	5.74	36110.9	5007.61	P09525	18	51.1	0	ANXA4_HUMAN	4471			19153	18552.7	25195.7	19260.7	19731.7	21325.7	8767.33	11234.3	8740	5928	4278	5144.33			3296			4946.5	12638.7	13697	12976.7	12942.7	14332.3	13625	13699.3	13473.7	13873	6511.33	7100	6763.33	5701	5024.5	8682	6732	5068.67	4620	5517	6152
Putative endoplasmin-like protein OS=Homo sapiens OX=9606 GN=HSP90B2P PE=5 SV=1	4.97	46372.3	5003.29	Q58FF3	15	26.07	0	ENPLL_HUMAN	19688.4	20562.7	18971.5	11238.1	12301.5	14455.7	16846.4	16462.1	23468.3	12225.7	16449.4	11589.6	9931.57	9321.27	12966.2	92901.7	88623	110883	9973.28	10462.8	11463.7	18781.1	16958.6	18615.5	12996	8740.4	8840.33	27726.7	28250.7	30093.6	17739.4	14417.2	16756.4	37110.4	34735.9	32508.7	30156.5	31175.7	25911.9	36886.7	32281.7
DNA replication licensing factor MCM7 OS=Homo sapiens OX=9606 GN=MCM7 PE=1 SV=4	6.06	81935.4	5002.3	P33993	38	52.85	0	MCM7_HUMAN	27674	22633	13390	43321.3	41141.3	47894.3	35402.7	36649	44944.3	17723	24299	18131.3	12239.3	12141.3	17034.7	12389.5	20550	10226.3	23926	14179.5	13552	48417.3	48336	50192.7	39669	37513.3	32860	40197.3	40568	39329	32524	35100.3	31158.7	28036.7	32416	42835.3	29118.7	29297.7	32099.7	39502.5	25658.3
Peptidyl-prolyl cis-trans isomerase FKBP10 OS=Homo sapiens OX=9606 GN=FKBP10 PE=1 SV=1	5.25	64758.4	4971.49	Q96AY3	22	46.05	0	FKB10_HUMAN	36879.7	34561	37178	34179.7	32249	35377.7	32428	29654.7	29615	32682.3	37246.7	36895.7	34789.7	32143	29210.3	50101	41246.3	50001.3	52317.3	50251.7	54242.7	40352.3	34820.3	35345	34281.3	27934.3	25919.7	35945	38345.7	29829.3	47738.3	40339.3	37429	45731.7	43914.7	41327.7	51171.3	44262.3	45810.7	60256.7	62068.7
60S ribosomal protein L9 OS=Homo sapiens OX=9606 GN=RPL9 PE=1 SV=1	10.61	21977.5	4965.6	P32969	6	49.48	0	RL9_HUMAN				5912	11385	10239	2135	4113	6142.67	8935	11125.5	3188		6271.5	7011					3299	4220	4185		3606.5			3380.5
60S ribosomal protein L31 OS=Homo sapiens OX=9606 GN=RPL31 PE=1 SV=1	11.21	14462.9	4955.99	P62899	5	38.4	0	RL31_HUMAN	13655	10738	6719	22610.7	21519.7	18364.3	17443.7	17189	16066	16609	7463.67	9376.5	5843	6282.5	4602.5	5352	5284		14422.3	10542.5	14656		1558			1385			1828											4755
ERO1-like protein alpha OS=Homo sapiens OX=9606 GN=ERO1A PE=1 SV=2	5.37	55248.1	4952.03	Q96HE7	22	48.72	0	ERO1A_HUMAN	28089	27019	30615.3	35386.7	35041.3	39535	38589.3	40170.3	47841.7	38828.7	43667.7	43703	30567	42439.7	51454	27608.3	51554	64944.3	31576.1	75291.3	86529	44014	42801	36474	39675.3	35459	34617	40018.4	40014.6	31969.9	41490	45862.7	35351	22484.7	27047	24590.7	24446.3	28621.6	28068.4	23296	28203
Heterogeneous nuclear ribonucleoprotein M OS=Homo sapiens OX=9606 GN=HNRNPM PE=1 SV=3	9.1	77801.1	4945.95	P52272	40	56.99	0	HNRPM_HUMAN	18809.3	17843	18146.7	19201	18024.3	15921.3	21450	19394.3	16131.7	16342.3	15232.7	16356.7	20475.3	18124.3	19986.7	52804.3	50780.7	49878.7	12842	12010	10161.7	60249.7	57700.3	58629.3	36632.3	40248.3	38026.3	40352.3	44100	36190.3	18952	22750.7	24047	20434.7	20185.3	12045	19457.3	20433	19689	12315.3	13307
Dihydropyrimidinase-related protein 3 OS=Homo sapiens OX=9606 GN=DPYSL3 PE=1 SV=1	6.06	62362.6	4944.82	Q14195	20	44.39	0	DPYL3_HUMAN	18350.3	18929.7	18528	16344.3	16267.7	16837.7	17148.7	16925.3	16915.3	19717.7	18046.7	19869	16021.7	15775.7	15989	13537.3	12962.7	11829.7	8520	8473.33	8251	15900.5	15173.1	14743.3	10978.7	15026.6	12187.5	18741.5	17748.8	17466.6	15359.7	17607	17113.6	17795.7	16719.7	15470.6	14220	13029.3	13967.7	5181	3668.01
Putative tubulin-like protein alpha-4B OS=Homo sapiens OX=9606 GN=TUBA4B PE=5 SV=2	7.77	27836.4	4941.26	Q9H853	2	12.45	0	TBA4B_HUMAN										5898.67	4183.67	1270		1982.33	1071.67																1728	2800			1996
Eukaryotic peptide chain release factor subunit 1 OS=Homo sapiens OX=9606 GN=ETF1 PE=1 SV=3	5.38	49259.1	4926.34	P62495	17	44.39	0	ERF1_HUMAN	4921	5304	4240	28252.3	27972.3	33438.3	27793	26997.3	30923.3	22995.3	26128	22874.3	4667.67	6117	6556			2532	4437	3721.5	4689.67	31483	31090.3	30354.3	31184.7	28147.3	28879.7	33836.3	33771.7	31142.3	38287.3	31878	32711	12299.7	9055.33	6365.67	7398.33	7957.67	7912.67	5768	5371.5
Ras-related protein Rab-5A OS=Homo sapiens OX=9606 GN=RAB5A PE=1 SV=2	8.25	23886.8	4925.59	P20339	8	53.49	0	RAB5A_HUMAN				5798.23	4987.88	7649.97	7725.85	7616.35	11985.8	8777.23	12064.2	8423.95	4239.42	4157.73	3544.58							3436.25	3017.71	2454.49	6174.97	3973.71	4124.92	4679.72	3310.09	6213.89	4058.11	4147.7	3619.27
ADP-ribosylation factor-like protein 2 OS=Homo sapiens OX=9606 GN=ARL2 PE=1 SV=4	5.94	21049.1	4912.55	P36404	8	52.17	0	ARL2_HUMAN				13058.7	12237	13611.7	14088.3	13188.7	13731	6474	7011.67	7316.33	3057					3034				11707	11486	11649.7	12342.7	10368.7	10469.7	10584.7	10251	11065.7	5057	5892	6921.33	3626.67	3833.33	4033.5		2794	2810
Enoyl-CoA delta isomerase 1_ mitochondrial OS=Homo sapiens OX=9606 GN=ECI1 PE=1 SV=1	8.68	33101.2	4904.88	P42126	10	30.46	0	ECI1_HUMAN	59403.3	58442.3	51115.3	41431.7	39732.3	41495.7	38172.7	38570.3	41269	56401.7	61189.3	57470.7	54513.7	51829.7	53366.3	74046	77899.7	84962.7	79359.7	85972.3	89309	49451.7	46452.7	42978	41204	36827.7	36693	49683.7	50234.3	41926.7	57554	68545	52862	62202.3	70339.3	67622.7	73913	75851.7	79905.3	63112.3	71465
Ubiquitin-conjugating enzyme E2 L5 OS=Homo sapiens OX=9606 GN=UBE2L5 PE=2 SV=1	7.97	18046.6	4892.46	A0A1B0GUS4	3	27.92	0	UB2L5_HUMAN																						3179.31	3347.39	4362.82	3761.01	3771.52	4272.36				2864.05	3785.24	3352.1
COP9 signalosome complex subunit 4 OS=Homo sapiens OX=9606 GN=COPS4 PE=1 SV=1	5.49	46554	4868.88	Q9BT78	24	67.49	0	CSN4_HUMAN	26693.3	24091.7	24105.3	28585.3	30302.7	23514.7	26238.3	26297.7	23719.7	25561.7	29713.3	27883.3	16622	19093.3	17469.7	20450.7	20977	10884.7	19728.3	19801.7	5863.67	18268.7	18725.7	18060.3	22382.7	18857.7	17511.7	19512	22348	22244	28087	22735	23929.7	16082	16482.3	16115	10786.7	8857.67	11427.7	5637	5224.67
Asparagine--tRNA ligase_ cytoplasmic OS=Homo sapiens OX=9606 GN=NARS1 PE=1 SV=1	5.87	63798.4	4846.07	O43776	30	43.8	0	SYNC_HUMAN	49767.5	47520.5	35619	46925.3	48901.3	48866.7	68007.7	67312	72983	44282.7	48136.3	44094	51392.3	48740	56782	50398	32220	39661.7	25008	24639.3	26758.7	50771.3	47520.7	50765.3	53593.7	44659	47167	45452.3	49497.7	45322.7	43021.3	50524	42353	35555.7	35888.3	7715.67	37091.3	41687	39751.7	23988	19626.5
LRP chaperone MESD OS=Homo sapiens OX=9606 GN=MESD PE=1 SV=2	7.96	26247.8	4843.07	Q14696	17	51.71	0	MESD_HUMAN	35090.7	34166.3	35285	28056	29481.3	32720.7	29051.3	31217.3	35615.3	35476	35134	35114.3	49005	48024.3	61572	31720.3	31700	36374	35633.3	34785	38167.3	27271.7	20279.3	23589.3	31588.3	26502.3	25811.7	30464.7	31751.7	28459.3	39591.3	39225	35962.7	41852	44281	36442.3	34418.3	34777.7	36836.7	30196.7	32730.3
Eukaryotic translation initiation factor 3 subunit A OS=Homo sapiens OX=9606 GN=EIF3A PE=1 SV=1	6.37	166969	4836.71	Q14152	68	46.74	0	EIF3A_HUMAN	12901.3	16475	12733	39675.3	36915.3	36715.7	28147.3	28587	26726.7	9113.67	12371.7	6832	10262.3	9225.33	15562	12576.3	11073.7	16686	12236.3	13198.7	17828.7	36884	32582.3	33543	34467	33871.3	34250.3	20845.3	17808.7	21888	7916.33	5068	12375.5	12770.3	9591.33	10287	15573.3	10340.7	12139	23610	21153.5
Selenide_ water dikinase 1 OS=Homo sapiens OX=9606 GN=SEPHS1 PE=1 SV=2	5.59	43424	4832.99	P49903	8	34.44	0	SPS1_HUMAN	23293	24007	23032.3	20731.3	21118.3	23727	19927.3	20757.3	21091.3	24631.3	25432.3	24823	25358.7	24001.7	24853	31500	31960.3	26594	35686.3	34640.7	28787	13717	13454	14308.3	15310.3	13830.3	15135.7	16314	14626.7	15634.3	18603.7	17172.7	19317	18296.7	19316	18819.7	14021.3	20018.7	22642.7	15823.5	16596.3
Geminin OS=Homo sapiens OX=9606 GN=GMNN PE=1 SV=1	4.74	23679.2	4827.38	O75496	10	49.28	0	GEMI_HUMAN	11358.3	12605.5	12213	8089	8613	6639	7915.5	9311	7172.67	11462	9401.67	11879	11527.3	9627.33	11735	19012	14904	10940	23223	16445.3	17531	7925	8454.33	7767	5883.5	4569	7605.67	13561	19708	17410	18334.5	18333.7	12100	13758.7	13277.3	31192.3	10929.7	13208	13147.7	16585	19764.5
Spermidine synthase OS=Homo sapiens OX=9606 GN=SRM PE=1 SV=1	5.16	34395	4824.31	P19623	12	56.95	0	SPEE_HUMAN	8036.5	13977	13752	63821	66994	59699.3	56020.7	56059.7	52776.7	33686.7	28031	35390.7	4856	7413	4391.33	5536	5328.5	5464	7713	5230.67	6779.67	43714	43432.7	45764	39283.3	33835.3	33059	46753	44186	39924.3	19846.3	18423.7	22012.3	15916.3	11841.7	11251.7	10878	10065	14963.7		5466.5
Huntingtin-interacting protein K OS=Homo sapiens OX=9606 GN=HYPK PE=1 SV=2	4.71	14665.5	4813.03	Q9NX55	7	43.41	0	HYPK_HUMAN	6553	13838	12954	5753.33	6810.33	8477.5	10334	6098.33	10345	9877.67	12094	9004.5	7009	8320.33	9691	16283	15552	15717	20824	21878	21831	5304	5023	6381.33	4459.5	6666	4720	6806	6501	3371	6710	7063.5	10892.7	10577
Peptidyl-prolyl cis-trans isomerase-like 1 OS=Homo sapiens OX=9606 GN=PPIL1 PE=1 SV=1	8.19	18350.9	4802.57	Q9Y3C6	7	39.76	0	PPIL1_HUMAN	8928	7973.5	8316	29671.3	26420.7	29946	21693.7	19819.7	22743.3	14029.3	15805.3	14703.3	7197.33	6755.67	7090.33	4563	6071	6353.5	5100	5506.5	7024	22298.3	23761	26416.3	16910.7	14332.3	14161.7	19648.7	19858.7	22957	14441	18594	21295.3	18280.3	17919	8530	10655.7	10071.3	9153.5	7129	7790
Cysteine and glycine-rich protein 2 OS=Homo sapiens OX=9606 GN=CSRP2 PE=1 SV=3	8.59	21866.3	4801.39	Q16527	5	35.75	0	CSRP2_HUMAN	12665.5	11885.5	11947	7319.67	8178	9743.67	6797.67	7381.67	8931.33	12311	9967.33	10249.5	9073	7642.33	12318	11102.3	10764	15181.3	10665	14499.7	14804	8554	8374.67	8754	9491	7994.33	8541.33	10582	12081	10271.7	10851	12724.7	12841	16962	17491.7	11789	14377	14357.3	16555.3	15469	14395.7
Cytosol aminopeptidase OS=Homo sapiens OX=9606 GN=LAP3 PE=1 SV=3	7.92	56565.6	4791.03	P28838	27	53.18	0	AMPL_HUMAN	32134.3	29720	31567.3	21173.3	18577.3	22841	21499	23329	21861	25120	29192.7	24036.3	34098.7	34279.3	38763.7	39520	39065.7	43089	40968.7	42105.3	45652	24168.3	22957.7	22803.3	20909	21666.7	22409.7	27226.3	29594.3	23027	24476.7	29514.3	25140.7	32225.7	34888.7	37072	35311.7	41417	41469	40020	39724.7
Coiled-coil domain-containing protein 124 OS=Homo sapiens OX=9606 GN=CCDC124 PE=1 SV=1	10.29	25835.3	4786.4	Q96CT7	10	45.29	0	CC124_HUMAN	12326	11786.7	11555.3	15278.7	15718	18325.3	17171	16198.3	19254.7	16346.3	19248.7	17271	16530.3	16114.7	15349.7	5576.5	4987.5	10038.7	9235.33	9506.67	11613	12151.7	11019.3	11033	11191	10686.7	10793.7	11980.7	12573	11542.3	9871	12487.7	13886.3	13953.3	11617.3	12454	14841.5	9093	11506	14373.5	20655
Putative RNA-binding protein Luc7-like 2 OS=Homo sapiens OX=9606 GN=LUC7L2 PE=1 SV=2	10.69	46970.2	4784.39	Q9Y383	12	29.08	0	LC7L2_HUMAN	7138.59	8535	6593.66	20857.3	17828.7	26089.7	21825.3	20028.3	26338	11550.3	17985.7	12928.3	10734.3	9710.33	14615.3	8443	7905	9315.33	10609	9848	13464	50756.2	36024.8	28562.2	27819	29592.3	41695	31299.9	31095.2	23127.9	26829.5	49594.3	24240.1	20810.9	23355.2	19076.1	19402.3	20068.2	21231.3	15974.2	18207.8
E3 ubiquitin-protein ligase CHIP OS=Homo sapiens OX=9606 GN=STUB1 PE=1 SV=2	5.53	35312.5	4778.6	Q9UNE7	11	33.99	0	CHIP_HUMAN				12512.7	12520	13910.3	4342.33	7104.67	6331.67	4929.5	2923	5064.67						2931			3677	16554.3	15501	17265.7	10912	9136.33	12533	6232.5	4891		6554	5340.5	5703	7606	5144.67	3278.5	5272	5160	6458
Exportin-1 OS=Homo sapiens OX=9606 GN=XPO1 PE=1 SV=1	5.67	124527	4777.13	O14980	38	41.36	0	XPO1_HUMAN	5308	5402.5	5321	43782.7	44618.7	46604.7	45669.3	48896.7	49303.3	15068	16459	14306.7	5711	5268.67	6745.67	7016	8768.5	8423.33	12443	10744.5	10108	29517	27801	26282	28118.7	28647.3	27514.7	27004.3	36614	31240	15958.3	18177.7	11194.7	11766	11967.7	14637	16780	22779.7	13017.7	6244.67	6505.67
40S ribosomal protein S23 OS=Homo sapiens OX=9606 GN=RPS23 PE=1 SV=3	11.22	15978.7	4752.56	P62266	4	28.67	0	RS23_HUMAN	6429.67	5799	6319	18789.7	15916	10856.7	13752	12890.3	10048	10131.7	8272	10784	4428	3786.67	4606.5	3469	3497	3914.67	8086.67	8598	8997	5381	5049	4111	5511	4790	4880	5301	3788	3282	2714	2419
Xaa-Pro aminopeptidase 1 OS=Homo sapiens OX=9606 GN=XPNPEP1 PE=1 SV=3	5.32	70602.3	4747.39	Q9NQW7	24	49.12	0	XPP1_HUMAN	4732		4440	26738.3	25571	28878.7	27378.3	22940.3	23071.3	13510.7	13831.3	16989.3	3008.67	3759	3521							28269	28683.3	23427	28211.3	21864.7	19986	15518.3	17154.3	16977.7	11752	15030.3	14827.3	7069	5287	4531.33	5083.5	5491.5	3905.5
Mitochondrial intermembrane space import and assembly protein 40 OS=Homo sapiens OX=9606 GN=CHCHD4 PE=1 SV=1	4.03	16395.6	4738.59	Q8N4Q1	6	33.8	0	MIA40_HUMAN						1653					2222		8008	7674	8825	6137.5	6795	8321.33	13633.3	14482	15626	5639.33	5424	4690.67	6316	5668.67	6161	5567.33	5440.33	6170.5	6846.67	7747.67	6786	9778.67	9354.67	7275.67	8975.67	9905.33	9924.67	6877.5	9001.33
N-alpha-acetyltransferase 10 OS=Homo sapiens OX=9606 GN=NAA10 PE=1 SV=1	5.31	26629.6	4737.76	P41227	16	60.85	0	NAA10_HUMAN				16380	16376.7	17078.2	17131.7	16713	19993.3	16051.7	17157.6	16432.7	3643	3096.33	3136.5			2770			4587	12740.3	13565.3	12288.3	11499.9	11005.1	10756.6	19535.7	18189.7	18790.7	14931.8	16396.8	15288.2	7811.42	7167.86	7081	4356.36	4760.3	4295.75	4259	4363
U2 small nuclear ribonucleoprotein B'' OS=Homo sapiens OX=9606 GN=SNRPB2 PE=1 SV=1	10.33	25486.4	4721.25	P08579	8	37.33	0	RU2B_HUMAN	24009.5	22134.9	26606.3	24271	22423.7	20441.2	21062.9	21338	20790.5	23181	22184.3	24887.8	28605.7	26342	21552.1	12348	11812.7	11950	8300.29	13933	19128.5	25518.7	26180.4	30094.8	26614.9	23451.1	22367.3	30827.6	29015.9	33089	36941.6	32145.9	38801.9	41868.1	36517	36232.1	42904.8	35702.1	31671.8	12601.2	11576.3
60S ribosomal protein L24 OS=Homo sapiens OX=9606 GN=RPL24 PE=1 SV=1	11.85	17893	4709.92	P83731	2	10.83	0	RL24_HUMAN	8046	8028	7438	22104	20017	16777	16539	17249	11116.5	10529	8375.5				6504	7220	7688	5571.5	15184	13754	9151.5	4152	4340	5983.5	5671	4466	4940	7818	8470	9922			4496	3633	3516
Ubiquitin carboxyl-terminal hydrolase 14 OS=Homo sapiens OX=9606 GN=USP14 PE=1 SV=3	5.02	56525.4	4708.73	P54578	21	37.45	0	UBP14_HUMAN	12384.3	10856.3	10895.7	49290.7	34367.7	37654.3	51649	38248	40606.3	31362	25476.7	29030.3	14034.7	13499.3	8847.33	8970	7861.67	8051.33	6356.67	6196	7283.67	25293.7	23909.7	25387.7	95843.3	74887.7	57135	27437	26193.7	26591.3	22899.3	19526.3	22402	13377.7	12558	11028.3	14017.3	51796	13966.7	10354	8080.33
Glyoxalase domain-containing protein 4 OS=Homo sapiens OX=9606 GN=GLOD4 PE=1 SV=1	5.26	35192.7	4705.11	Q9HC38	17	54.63	0	GLOD4_HUMAN	21937.7	20910.3	20835.7	47192.7	49544.7	44866	50901.3	49049	45267.7	38632	35294.7	44521.7	20502.3	18332	17556.7	12365.7	11462.3	10714	13478	12702.3	11654.7	34260.3	35720	35772	30882	30112	30992.3	47044	43176.7	42965.7	33046.3	32396.7	33338.7	21761.3	20071.3	21317.7	16709.7	18926.3	24404	12755.7	10672.3
Acyl-coenzyme A thioesterase 13 OS=Homo sapiens OX=9606 GN=ACOT13 PE=1 SV=1	9.77	15074.6	4696.02	Q9NPJ3	6	47.14	0	ACO13_HUMAN	33167.5	31728.5	34047	14061	16802	17647.7	11886.3	16861.5	14415.7	23696	25464	22932.5	27342.3	25000	29803	35082.5	25790.3	22449.3	37145.5	27604	26089.7	15698.3	15880	22542	14738.7	14933	15036.7	26512	26900	26728.5	35201	23963.3	34004.5	32351.7	32078.7	39910.5	52423.5	57560	58866	26906.5	33868
Actin-related protein 2/3 complex subunit 5 OS=Homo sapiens OX=9606 GN=ARPC5 PE=1 SV=3	5.31	16377.5	4666.75	O15511	6	45.03	0	ARPC5_HUMAN	11700.7	13466.3	14941.6	11059	10760	18731	12001	11154.5	12093.3	17330	15908	15618.7	11840.7	11405.7	11663	16137.8	8938	10015.3	6574.34	7099	7748.73	12281.5	11424.9	20773.5	12104.5	9699	10073.5	13064.3	12821	15410.6	13590.7	15497	21434.7	26322.4	16921.7	23157.3	15972.7	10995	15281.6		4853
Thioredoxin domain-containing protein 5 OS=Homo sapiens OX=9606 GN=TXNDC5 PE=1 SV=2	5.59	48313.2	4661.18	Q8NBS9	16	36.57	0	TXND5_HUMAN	58043	51480.3	55989.7	57567	54326.7	62127.7	52169.7	47327	63649.3	66852.7	75547.3	64863.7	69082.3	69672.3	79914.3	66546.7	66567.7	59968.3	57114.7	63076	59197.3	43932	42025	44614.3	50153	48858.3	43014.7	54618.7	54401.3	55499.7	59731	59702	65565.3	72925.7	68680.3	68283.3	74444.3	71409.3	69915.3	66329	66758.3
Apoptosis inhibitor 5 OS=Homo sapiens OX=9606 GN=API5 PE=1 SV=3	7.16	59346.8	4636.75	Q9BZZ5	21	37.02	0	API5_HUMAN	16919.7	17296	19056	31473.7	34351.3	33781.3	33726.3	37163	38499.7	45357.3	47842.3	50620	21496.3	21629.3	21010.7	10921.7	10513.3	10977	12133.7	12250.3	12996.7	37539.7	37218.3	32778.3	35355	36507.7	33315	42637.3	40666	36992.3	42707.7	41667.3	40445.3	27426	29160	27931.3	9579.67	10878	10547.3	7333	7705
Fumarate hydratase_ mitochondrial OS=Homo sapiens OX=9606 GN=FH PE=1 SV=3	9.18	54808.2	4627.71	P07954	21	56.67	0	FUMH_HUMAN				21529.3	21840.3	26741.3	20965.7	20157	26137	12188	13620	13444			2339	5080	4913	8215	5263	5353	10564	34323.7	36275.3	34147.7	33420	32086.7	32131	34437.3	35160.3	34428	20848	21470.3	21247.3	5655.33	7089.33	5822.5	7746.67	8052	8356.67	6950	7573.67
Basic leucine zipper and W2 domain-containing protein 1 OS=Homo sapiens OX=9606 GN=BZW1 PE=1 SV=1	5.62	48214.4	4609.91	Q7L1Q6	23	37.95	0	BZW1_HUMAN	16456.7	4706	25724	28371	25555.7	28655.7	25761.7	19405	26034	7347	10724	7926	19142.7	10391.7	6727.67	26745	20194	6717	20525.5	20664	7361.67	37323	30506.7	40148.3	36648.7	25906.3	31832.7	24836	25560.7	31480.7	9201.33	11547.7	22082.7	22650.7	14965.7	4357.69	19750	10932.3	13581.7	16534.7	12763
UPF0160 protein MYG1_ mitochondrial OS=Homo sapiens OX=9606 GN=C12orf10 PE=1 SV=2	6.23	42791.5	4609.76	Q9HB07	15	46.54	0	MYG1_HUMAN	18963.3	18753.7	17898	20369.7	19990.3	19332	18707.7	18405.7	17613.3	20923.7	18442.7	23333	16883.7	16737	14187	14515	12869.7	9229.33	13354	13876	8596	18719.7	16966.3	17955	18345.3	15278.3	14687	15276.7	14853.7	14524.7	12489.3	12271.7	14482.3	13214	12287.7	8525.33	9263	9943	11511
Mannose-6-phosphate isomerase OS=Homo sapiens OX=9606 GN=MPI PE=1 SV=2	5.57	47226.3	4594.6	P34949	11	32.62	0	MPI_HUMAN	4923		4859	20300	23281.3	24770	15145.3	16346.3	16865.7	12334.7	11422.7	10762.3		2760	3683.33			3204	4209		3487.5	18899	14966.3	17034	15813.3	12944.3	9526	14857	14205.3	12326.5	11135.3	12033.7	12218.3	5286	7346		7332		7151
Eukaryotic translation initiation factor 3 subunit F OS=Homo sapiens OX=9606 GN=EIF3F PE=1 SV=1	5.1	37678	4592.91	O00303	12	44.82	0	EIF3F_HUMAN				29048.7	26971.3	36766.3	19911.7	19272.3	27596	7476.67	9878.67	7048	3611	3441	4835.67			4377.5	3833	3601.5	5700	24978.7	27611.7	31593	27102.7	22273	23251	21295.7	21664.7	22293.7	7810.33	9320	8940.67	9154	10442.7	3664.67	11071	8391.67	8855.67	8556	7654
Thioredoxin reductase 1_ cytoplasmic OS=Homo sapiens OX=9606 GN=TXNRD1 PE=1 SV=3	7.13	71725.6	4590.46	Q16881	19	41.29	0	TRXR1_HUMAN	34911.3	36348.7	34536.3	24376	26283.3	24881.3	24544.7	28182	27133	34195	33969	33196.3	37007	35831.3	37826	44276.3	46673.3	39170.3	42235.7	47484.7	42186.3	20515	20748.3	24665	14314.3	15517	16115.3	20872.7	21313.3	23302.3	20572	27893.7	28450.3	28542.7	21864.7	18492.3	31972	28803	30138.3	33728.3	33868
Ubiquitin carboxyl-terminal hydrolase isozyme L3 OS=Homo sapiens OX=9606 GN=UCHL3 PE=1 SV=1	4.66	26353.7	4583.61	P15374	8	33.48	0	UCHL3_HUMAN	6174.67	5775.33	6852.33	14431.7	13778.3	16910.7	14137.7	13051.3	17658	14629	19421	14123	5724.67	7914.67	10813.3	7984	7037.33	11312.3	7858.33	7756.33	12116.7	9980	9357.67	11965.7	11479	8358	7885	13476.7	10846.3	12156	11402.3	13071.7	14575.7	11678	9786.33	5835.67	8590	8936	9093.67	9215	9176
Lamina-associated polypeptide 2_ isoform alpha OS=Homo sapiens OX=9606 GN=TMPO PE=1 SV=2	7.53	76062.4	4583.41	P42166	28	48.56	0	LAP2A_HUMAN	4645.32	3828.84	4276.56	13518.6	13220.6	15445	11347	11806.7	12908.5	5246.4	6778.38	5513.6	4976.29	5375.18	6296.68	3481.71	3407.6	4745.13	4241.48	3318.87	5863.43	15109.4	15131	14102	12790.2	12293.5	12023.7	11827.1	11374.3	10045.5	7549.21	6207.02	5463.89	6053.39	8467.99	7802.78	5528.88	8702.25	8418.93	5318.66	9721.51
Cytochrome c oxidase subunit 5B_ mitochondrial OS=Homo sapiens OX=9606 GN=COX5B PE=1 SV=2	9.03	13923.8	4578.2	P10606	6	45.74	0	COX5B_HUMAN						1902							3522	2902	4864	5503	5307	7151	13279	14345.5	13890.5	3736.5	3091		1748	2516	2626	3209	3415.67			5312	4946	7496	8028.33	8533	17085	12531	14871.7	54851	63058
Mycophenolic acid acyl-glucuronide esterase_ mitochondrial OS=Homo sapiens OX=9606 GN=ABHD10 PE=1 SV=1	8.72	34274.7	4555	Q9NUJ1	15	64.05	0	ABHDA_HUMAN	10598.7	11596.3	13508	7105.33	6241.33	7679	7746	7500.33	7846.33	10509	12026.7	10760.3	13142.3	13735.7	16464.7	15540.7	15958	17648.3	7761.33	8753.33	10805.7	9196.67	13056	12956.3	12541.7	13220.7	9704.67	9889.67	8408.33	7766.67	12373.7	15326.3	14247	16664.3	15626.7	13522.5	15171	16263.3	16147.3
26S proteasome non-ATPase regulatory subunit 6 OS=Homo sapiens OX=9606 GN=PSMD6 PE=1 SV=1	5.3	45816.6	4537.83	Q15008	23	59.13	0	PSMD6_HUMAN	47692.3	68700	46879	43716.7	42208	53288.3	47172	44393.3	57647.3	41960.7	54001.7	42519	30577.3	30603	38433.3	35896	52398.5	40648.7	42090.7	64683	52251.7	64472.3	56014.3	56460.3	44961	66979.7	65477.3	61511.3	56134.3	55386	17617.3	52450	46844	48124	49749	8938.67	49933.3	46408.7	49043.3	37405	47330
Histidine--tRNA ligase_ cytoplasmic OS=Homo sapiens OX=9606 GN=HARS PE=1 SV=2	5.58	57980.9	4536.24	P12081	21	43.03	0	SYHC_HUMAN	3018.76	2144.06	3203.75	33233.7	32970	28255	30214	31304.3	28933	15031.3	13064	14047.3	4680.33	4570.67	4848.33	2985.51	3478.4	3495.44	2306.49		2700.54	20306	20619.6	20663.8	21797.7	23449	23362.3	17492.3	17661.6	17502.4	5335	6755	6938.67	6096.2	5646	3978	8769	6089.33	5902	18367	8666.67
Isochorismatase domain-containing protein 1 OS=Homo sapiens OX=9606 GN=ISOC1 PE=1 SV=3	7.19	32521.9	4528.89	Q96CN7	14	50	0	ISOC1_HUMAN	27192.7	28225.3	27947.3	21072.7	17692.3	17814.7	17373.7	16154	17106	28983	21327	22865	30480.7	28082	20097.3			5265.67			3640.33	15317.7	14905.7	15414.7	12829.3	11036.3	11008.3	17176.7	16660	14132.3	18487.3	20580.7	18749.7	17474.3	16317.7	14515.7	7248.67	6879	6179	5731	5520
Multifunctional methyltransferase subunit TRM112-like protein OS=Homo sapiens OX=9606 GN=TRMT112 PE=1 SV=1	5.05	14313.5	4523.11	Q9UI30	3	32	0	TR112_HUMAN	11266	10421	10870	13875	15831	19340	16026	14589	19000	14596	11458	15591	12586	14666	16443	9800	9533	11094	10513	11313	12707	28549	26216	23882	22287	27241	26180	25069	25039	21378	24372	29528	25197	21636	23575		8885	13400	12795
Glycylpeptide N-tetradecanoyltransferase 1 OS=Homo sapiens OX=9606 GN=NMT1 PE=1 SV=2	7.72	57148.5	4519.29	P30419	19	46.57	0	NMT1_HUMAN				29288	34694.7	42538	28618	35868.7	45904.3	15138.3	33540.3	15869.3	9719	10752	6071.5		4749	2897.21	5411.88		4269.09	26021	25096.3	36274	35694	22945	34885	27640.3	36892.7	41472.3	33802	20868.7	31807.7	7196	8134.67		9468.5	7990.67	9785.33
Elongin-B OS=Homo sapiens OX=9606 GN=ELOB PE=1 SV=1	4.53	13246.9	4514.41	Q15370	7	31.36	0	ELOB_HUMAN	26212	25376	25747.3	32635.7	30960.7	27897.7	37655.7	35146.3	41216.3	40908.3	52260.3	42212	27174.7	26503.7	27906	16035.7	14566.7	15484.3	20737.7	20468.3	21856	22750	17234.3	23585	17224.7	17063.7	16382.3	35302.7	33858.7	39258.3	44149	38688.7	42872	39118	31640.3	41311.3	41872	44416.7	43127	46457.7	41665
Cytosolic non-specific dipeptidase OS=Homo sapiens OX=9606 GN=CNDP2 PE=1 SV=2	5.59	53220.7	4501.07	Q96KP4	18	51.16	0	CNDP2_HUMAN	26535.3	20338.7	23809	33487.3	30124	34688.7	35402	35114.7	34592.3	33996	35073	31387.3	24038.7	28349.7	26358	23336.7	22843	23699.7	20077.7	21379.3	22444.7	38559	36631.3	29000	32826	28670.3	29725	22720.7	26102	22693.7	23055.3	28402.3	27342.3	26605.7	25794.7	24744.3	32085.3	30391.7	24972.3	26375.3	25361.3
TPT1-like protein OS=Homo sapiens OX=9606 PE=2 SV=2	5.8	15814	4498.98	Q56UQ5	3	30	0	TPT1L_HUMAN																						3128.05	1833.62	2278.83	2296.2	2591.89	2374.1	2045.93	2001.08	2060.18	2867.09	2418.2	2443.17
Cold shock domain-containing protein E1 OS=Homo sapiens OX=9606 GN=CSDE1 PE=1 SV=2	5.85	89740.2	4490.21	O75534	35	45.49	0	CSDE1_HUMAN				14060.7	14743.3	16794.3	8872	8539.67	10644.7	3663.33	6541.67	3826.67	3243.33	3557	5483.33		4097	3629		4881	7312	23650.7	23556.3	23487	25502	24520.3	25442.7	11152.3	11834	11468	7301.67	6802	7681	9064	7858	6125.33	9064.33	7375.33	6780.67	7306.33	6970.33
Hypoxia up-regulated protein 1 OS=Homo sapiens OX=9606 GN=HYOU1 PE=1 SV=1	4.97	111564	4489.4	Q9Y4L1	49	55.16	0	HYOU1_HUMAN	49415.7	48417.7	48456	45402	50466.7	46615.7	45498.3	47226.7	47354.7	57098.3	46561	53563.3	42728.7	46000.7	41325.3	39600	41895.3	25073	32027.7	30170	22352.7	41849	44623.3	38146.3	35557.7	39447.7	46693.3	45865	42261.7	35031	53640.7	48427.7	39922	39919	59650.7	39262	37941.3	54496.3	53996	30862.7	31630.3
40S ribosomal protein S25 OS=Homo sapiens OX=9606 GN=RPS25 PE=1 SV=1	10.84	13799.2	4479.08	P62851	3	23.2	0	RS25_HUMAN	19670	10834	16227	13913.5	13349.5	24893	13580.5	22367	21379	18376	16144	17722	16515	16636	14013	9721	12487	11797	16354.5	16817	23772	8890	10189	10047	8405	7285	7501	12099	10805	13911		8663	11574	10053	10943		13353	12232		14162	14161
Protein C10 OS=Homo sapiens OX=9606 GN=C12orf57 PE=1 SV=1	4.85	13292.2	4477.77	Q99622	2	26.19	0	C10_HUMAN				6054	5846	7153	6093	5491	6674	3540	6734	4585	5154	5095	7746	4557		6736	5212	5134	7734			8821	7307	5090.33	5411				7543			8731	9926		11528	11276	11590	8143	12683
Serine/arginine-rich splicing factor 4 OS=Homo sapiens OX=9606 GN=SRSF4 PE=1 SV=2	12.02	56792.5	4475.57	Q08170	12	24.09	0	SRSF4_HUMAN				12813.7	13034.2	16523.5	7559.48	12653.8	15159.1	6211.39	10367.3	6184.14	6553.34	6000.31	5755.18	8175.53	8269.26	8250.37	9112.33	9386.65	12324.4	17763.9	18381.1	19475.1	17989.1	15376.1	13857.5	18427.1	18080.3	19596.6	26719.3	18737.1	20076.5	20277.5	16473.4	16862.2	18330.1	15500.2	9838.49	21693.9	15996.1
Acyl-coenzyme A thioesterase 2_ mitochondrial OS=Homo sapiens OX=9606 GN=ACOT2 PE=1 SV=6	8.54	53617.8	4453.21	P49753	19	54.45	0	ACOT2_HUMAN				15174.7	16442	17287.3	15407.7	17581.3	18023.7	13279.7	15985	12721	2862.5	4291.5	14825		3166	19257.5			44644	22329.7	21931.7	22785	20717.7	20114	22042.7	19534.7	17203.3	19747.7	11111.3	12546	13348	7603	6819.33	5459.5	7454	9037	9130	6652	4990.5
Casein kinase II subunit alpha OS=Homo sapiens OX=9606 GN=CSNK2A1 PE=1 SV=1	7.61	45257.7	4449.06	P68400	19	54.73	0	CSK21_HUMAN	14220.7	13623.7	14367.7	23844.3	25107	29798.7	24705	25838	29480	23660	24503.7	22851.3	11360.7	12683.7	13459.3	11868.5	10420	9867.33	9391	11775.5	12570.7	31901.7	36500	34444.3	35153	26035	26375	27379.3	27270	25196.7	16913	21200.3	20421.3	17407	15875.7	67272.8	30753	13028	19218.5	31174	22361.5
Ubiquilin-2 OS=Homo sapiens OX=9606 GN=UBQLN2 PE=1 SV=2	4.97	65696.3	4437.66	Q9UHD9	14	31.73	0	UBQL2_HUMAN	17110.6	20217.6	20736.4	19467.1	18370.8	23979.3	19627.4	17859.5	25990	19701.7	26538.4	21768.8	23734.5	23531.4	29719	23101.2	22591.8	30775	23509.3	24127.3	30634.3	19846	18921.2	19864.6	16701.7	17302.5	17465.4	30681	27306	27973	25532.4	24686.5	25625.7	47284.3	44888	38915.5	36172.1	36377.8	38891.1	22756.8	30480.9
40S ribosomal protein S12 OS=Homo sapiens OX=9606 GN=RPS12 PE=1 SV=3	7	14914.2	4436.61	P25398	4	28.79	0	RS12_HUMAN	57960.7	57722	57052.3	58160	63149.7	71182.3	57475	63205.7	67300.3	56504.3	60861.3	60734	51672	49949	48812.7	57695.3	49920	51840.3	45565.7	47664	48830.7	72310.7	69853.3	73955.3	77762	72334	67440.7	69791.7	67945.3	76018	78739.7	76119.3	85545.3	87291.3	72505.7	69513	77389	71359.3	73333	30014	42345.7
Histone H1t OS=Homo sapiens OX=9606 GN=HIST1H1T PE=2 SV=4	12.27	22019	4428.47	P22492	4	18.84	0	H1T_HUMAN	2909.85	2889.18	3308.1				5258.67	3946.1	8786.52	4119.92	5680.92	8866.77	9532.9	9658.33	10934	4194.23	3950.37	4515.28	3557.69	6786.97	3708	8066.71	6068.86	8789.57				9862.71	12482.3	12023.4	6672.36	9516.63	8893.01	17929	18349.8	12512.1	18935.8	19190.9	18092.2	16656.8	16479.7
Cell division control protein 42 homolog OS=Homo sapiens OX=9606 GN=CDC42 PE=1 SV=2	6.18	21600.8	4420.48	P60953	3	25.65	0	CDC42_HUMAN	12585	10491	10485	16830.5	12593	7297	19188.5	20363	13051	21145	12852	18371	13207	8789.5	7154	6621	6079		5721	3509		3303	4748		9108	7446	9502.5
Charged multivesicular body protein 4a OS=Homo sapiens OX=9606 GN=CHMP4A PE=1 SV=3	4.45	25098.3	4413.68	Q9BY43	11	52.7	0	CHM4A_HUMAN	27760.3	24996.7	26085.3	14012.7	13244.7	16885.3	15175.3	15057.7	17504.7	20101.7	22544.7	20043	23979	21720.7	27736.3	31405	28356.3	33974.7	34682.3	34397.3	42374.3	9587	9598.33	9595.67	9504.67	9814	9643.33	12390.7	12544.7	12704	15396.7	14134.3	15953.7	19755	19442.3	16936.3	21839.7	22030	23217.7	19241.7	24308
Histone H3.1t OS=Homo sapiens OX=9606 GN=HIST3H3 PE=1 SV=3	11.69	15622.3	4402.92	Q16695	5	23.53	0	H31T_HUMAN	24946	39242	42383	19948	18002.7	22135	14139.3	24128	16363.7	14485	17406.5	15584.5	14174	13669	18359	23494	21492	24574	36842	25755	24028	28139.3	31426.7	28810	26729.7	35135	25466.7	37764.3	41143.7	38663.7	19912.5	33171	33713.7	40477.7	43171.3	40798	40461.5	27539	29099	71302.3	69122.7
Histidine triad nucleotide-binding protein 2_ mitochondrial OS=Homo sapiens OX=9606 GN=HINT2 PE=1 SV=1	9.65	17218.8	4395.1	Q9BX68	7	50.31	0	HINT2_HUMAN	17599	13737.5	13757.5	22932	17961	11541.3	18847	19943.5	12723	18305.7	22051.5	18738	37430	36188	14812.7	8949	12602.5	10256	3909	10442	7924.5	16831.7	21900.5	15735	19853.3	14294.3	16482	8885	8480.5	6798.5	37420.5	25807.3	11630.5	26578.7	6770	45728.5	30786	7795.33	8959	14854	11657
Bifunctional glutamate/proline--tRNA ligase OS=Homo sapiens OX=9606 GN=EPRS PE=1 SV=5	7	172188	4394.54	P07814	63	49.01	0	SYEP_HUMAN	12304	16630	13100	34910	36970.7	46813.7	15584.7	15185.7	23679.7	13963	21734	14171.3	12271	12041	19874.3	71639.5	70736	48088	6169	7042.33	11396.3	38265	37766	37752	33183.7	30140.3	29492.7	16719.3	13919.7	15004	9824	9237.67	10704	23313.7	18942.7	18365	13907.7	11628.3	11252.7	39733.5	23075
Glucosamine 6-phosphate N-acetyltransferase OS=Homo sapiens OX=9606 GN=GNPNAT1 PE=1 SV=1	8	21091.3	4390.98	Q96EK6	3	17.39	0	GNA1_HUMAN	14324	13557	13896	7632.5	6602	5986	8070	7249.5	4802	7568	8001	12470.5	8182.5	5935	4534	6686	6470	4029				5382	5186.5	8929	5529.5	6476	5976	7332	8195	11443	8936	6942	14566	16184	10863	10110
U6 snRNA-associated Sm-like protein LSm6 OS=Homo sapiens OX=9606 GN=LSM6 PE=1 SV=1	10	9184.62	4381.48	P62312	3	32.5	0	LSM6_HUMAN	7805	9648	8476.5	4748		4796			5461	6144	7705	6763.5	5562.5	6577.5	7671.5	9063	9943	11151.5	10041.5	10502	12322			4214	2414			8071.5		7567		9266.5	9665	11256	11921		18677.5	15393.5	18949	24516	23672
Nucleosome assembly protein 1-like 4 OS=Homo sapiens OX=9606 GN=NAP1L4 PE=1 SV=1	4.4	42994.6	4375.05	Q99733	15	49.07	0	NP1L4_HUMAN	15007.4	13966.8	16421.9	32003.8	32764	19488.7	34659.6	34187.9	29003	29941	18997.6	32302.1	16331.1	13996.7	12214	9791.16	7524.8	6540	10740.9	15354.6	12325.7	30030.7	28653.3	17748.7	16479.3	17676	21046.7	31515.7	29351.7	27583	38723.4	33859	22243.7	14961.7	15074.3	27683.1	12709	9222.67	13557.3	7983.36	7784.37
COP9 signalosome complex subunit 3 OS=Homo sapiens OX=9606 GN=COPS3 PE=1 SV=3	6.22	48443.5	4371.39	Q9UNS2	15	44.68	0	CSN3_HUMAN	11357	10805.7	10999.3	26524	21679.3	32230.3	23872.7	10282.7	31901.3	21000.3	34328.3	19833.7	12391.7	12775.3	20099.7	18148	16648	20362.3	15539	14762	20803.3	15196.7	14778.3	27332	23564.7	27432	26646.3	26532.7	29473.7	27004.3	24223.7	24680.3	23582.7	18633.3	20027.3	21572.7	17376.7	13816.7	16495.7	10227.3	9339
cAMP-regulated phosphoprotein 19 OS=Homo sapiens OX=9606 GN=ARPP19 PE=1 SV=2	9.73	12323	4370.52	P56211	4	38.39	0	ARP19_HUMAN	21495	21703	18057	11933	11581	6687	12784	10321	7828.56	10822.3	16061	16906	24030	14126.9	24116	8780.08	7595.56	9229.49	4247.51	4615.94	6295.58	13877	9602.31	12905.1	3044	4168	3232.33	8326.5	9080	10360.3	8964.92	11392.2	12536	14360.1	19619		12413	8410	12785.5		5724.72
Vacuolar protein sorting-associated protein 35 OS=Homo sapiens OX=9606 GN=VPS35 PE=1 SV=2	5.18	92505.6	4367.08	Q96QK1	25	34.42	0	VPS35_HUMAN	7490	6410	6698.33	29506.7	28052.7	32267.7	31536.7	30450.3	38269.7	30934.7	37522.7	31637	7735	8437.67	11464.7	5925	6442	5770	4584	4852	6612.33	29479	28375.7	24320.7	23680	22948.7	23010	27003	27822.7	24425.7	21465	24591	19787.7	11662.3	11178.7	9365.33	9559	10909.7	9223.67	6259.33	7297.33
Insulin-like growth factor 2 mRNA-binding protein 1 OS=Homo sapiens OX=9606 GN=IGF2BP1 PE=1 SV=2	9.72	63822.9	4351.05	Q9NZI8	19	35.36	0	IF2B1_HUMAN	5446	4276	4184	19611.7	20007.7	23288.7	12595.3	12558.3	15572.3	4788.33	5924	5130.33	3061.33	3654	4515.67			2658	4332.67	3819	5914	18438.3	18593	15113.3	12696	11680	11859	10163	9831	9468.33	10742.7	7400	2406.74	3794.04	5367.21	73258	10338	4272.67	6565.33	4378	7041.67
Methylosome subunit pICln OS=Homo sapiens OX=9606 GN=CLNS1A PE=1 SV=1	3.77	26386.4	4340.61	P54105	8	60.34	0	ICLN_HUMAN	8666	10147	9509	8449	7712.67	12396.7	7950.67	7353	8317.33	8551.33	13990	8572.67	7601	6109.67	7249.67	9866	9006	5750	10373	10865	5834.67	14268	13026	10548	8881	9270	10066	15145	11944	14176	31437.7	14765.7	11185	11531.5	27040	31015	19866	13391	14639.5	19520	23285
Translin-associated protein X OS=Homo sapiens OX=9606 GN=TSNAX PE=1 SV=1	6.13	33226.6	4336.67	Q99598	17	68.62	0	TSNAX_HUMAN	13870.3	13457.7	15285.3	19263	22779	22417	17873.7	19000	29377.7	19256.3	20732.7	19049.7	11596.3	11294.3	21226	14305.3	14137.7	23278	13130	18818.3	22917.7	22827	25070	21949.3	21519	21393.7	20524.3	17889.7	20170.3	20458	9717.67	14282.3	19105.3	14354	11402.7	9602.33	17687	11365.3	14463	7373.67	8638.67
60S ribosomal protein L21 OS=Homo sapiens OX=9606 GN=RPL21 PE=1 SV=2	11.16	18621.9	4336.39	P46778	4	31.88	0	RL21_HUMAN	4128	6163	5883	9549.67	8220.33	8490	6915.33	5959.33	5912	6508	5364.5	4825	4052	4234	2771	3847	3578	2672	6271	6091	5722				3011.5	1074	2697	2967			2541	2040				2063
ADP-ribosylation factor-like protein 3 OS=Homo sapiens OX=9606 GN=ARL3 PE=1 SV=2	7.1	20626.6	4324.6	P36405	11	69.23	0	ARL3_HUMAN	26645.7	25284.3	25142	25283	27456.3	21915.3	25704.7	29474	22043.7	29892	24316	32823.7	25908.7	23421.3	20407.3	14834	13493.7	11416.3	12556	11705	10189	20139.3	20645.7	22537	20235.7	17903	18715.7	24743.7	24096.7	25833.3	25456.7	27671.7	32966.7	30920	26647	22344	19572	13390.7	33837	4619	4157
Eukaryotic translation initiation factor 4 gamma 1 OS=Homo sapiens OX=9606 GN=EIF4G1 PE=1 SV=4	5.07	176233	4320.09	Q04637	61	37.4	0	IF4G1_HUMAN	26594	31082	30198	47220.3	50213.7	52559.3	41777	41629.3	52000	30377.3	39942.7	33778	31351	32193.7	37293.7	19275.3	31058	34932.3	40843	25308.3	39317	66328.3	65913.7	56816	52427	57548	57706.3	56749.7	55986.7	44469.3	41910.7	42372.3	41973.7	39316.3	39612	34621.7	41697	41283.3	41807.7	38401.7	41188.7
Mitochondrial-processing peptidase subunit beta OS=Homo sapiens OX=9606 GN=PMPCB PE=1 SV=2	6.41	55107.6	4314.18	O75439	17	42.33	0	MPPB_HUMAN				13847	13786	14665.7	14379.7	13268.3	15298.7	12956.3	14039.3	13881.3										36974.7	37192	37346	37666	32771.7	30144.3	38492.3	37931	36524	35100.3	37677	37133	13189.7	9259	9695.33	10029.7	8715	8958.33	7094.33	5100.5
Heterogeneous nuclear ribonucleoprotein D-like OS=Homo sapiens OX=9606 GN=HNRNPDL PE=1 SV=3	9.96	46608.7	4304.32	O14979	11	23.1	0	HNRDL_HUMAN	14066.6	14369.9	15476.8	22324.6	22727.5	24652	16904.3	16404.7	16531	12216.4	16980.3	13814.1	14956.5	15315	17844	26390.9	59261.4	62681.7	28398.6	27700	28519.4	41891.7	41615.7	34571.7	36454.8	34749.5	35026.7	58250.3	60161.3	46004.6	68478.6	72975.7	61866.4	71680.8	87522.1	71535	77558.7	111383	108705	62163.3	97309.8
Bleomycin hydrolase OS=Homo sapiens OX=9606 GN=BLMH PE=1 SV=1	5.85	53189.7	4301.1	Q13867	16	36.7	0	BLMH_HUMAN	57133.7	50564.3	50005.3	43976.3	45008.3	47641.7	43317	44649.7	39675.7	54403.3	49055.3	59636.3	50470.3	49556	39184	81175.7	70885.7	68521.7	57299.7	61693.3	55489.3	35468.3	35376.7	34630	37134.3	35958	32512.3	42739.7	41134.7	36400.3	46372.3	43330	45373	43784.7	34221	38277	31076.3	36419.3	33961.3	13585.3	15708
NAD-dependent malic enzyme_ mitochondrial OS=Homo sapiens OX=9606 GN=ME2 PE=1 SV=1	7.46	66071	4296.33	P23368	19	40.07	0	MAOM_HUMAN	15058	15765	15546.3	25583	26624	21346	27098	27141	21160	26765	25057	28807.7	18031.7	19194.7	16670.3							25542	28312.3	25593.3	25790.7	24047.3	22661.7	32688.3	21839	20561.7	43331.3	24238.3	24060.3	21909.3	17419.7	43066.3	12885.3	19613.7	12725	4761	4894
Mitochondrial-processing peptidase subunit alpha OS=Homo sapiens OX=9606 GN=PMPCA PE=1 SV=2	6.5	58766.3	4294.18	Q10713	20	48.38	0	MPPA_HUMAN				10603.3	11867.7	13779.7	12008.7	12065	13306.3	12603.3	13951.3	12596.7			4808							39585.7	39512.7	39948	31173.7	34925.7	35039.7	39412.3	38994.3	39221	32626	33582.3	36509.3	10047.3	8095.33	6930.67	5794	6207.5	7570	4224	4236.5
Prefoldin subunit 3 OS=Homo sapiens OX=9606 GN=VBP1 PE=1 SV=4	6.98	22797	4293.3	P61758	12	55.84	0	PFD3_HUMAN	29454	27901.7	28979	20890.3	25424.7	28512.3	15447.3	23244.3	25139	27912	32371	26664.3	26101.7	31940.7	32170	24707	23661	25495.7	16220.7	16657.7	17431	8402	9052	15221.7	7045.33	9150.33	9402.67	11107.3	19888	27770	36454.3	29212.7	31245.3	38079	37065.7	40608.7	37712	34303.7	34786.7	24542.7	22569
Alpha-actinin-2 OS=Homo sapiens OX=9606 GN=ACTN2 PE=1 SV=1	5.16	104424	4292.67	P35609	28	35.01	0	ACTN2_HUMAN	11038.3	11971.9	12067.6	22725.9	22604.5	19437	15728.3	15586.8	14113	17833.1	15513.7	21012.2	5619.23	5591.65	5666.11	8196	6454.09	6392.9	7836.67	6773.67	7246	46188.7	44567.9	34434.5	24573.7	26091.1	24719.6	47438.5	44795.3	33598.9	46190.4	49885.6	40137	35018.7	13880.4	29623.1	10192.6	7373.85	12668.4	5162.87	6352.48
Phosphoglucomutase-1 OS=Homo sapiens OX=9606 GN=PGM1 PE=1 SV=3	6.33	61734.4	4288.86	P36871	28	54.09	0	PGM1_HUMAN	24279	22591	25475	24839.7	23435.3	32055.7	26009.7	24355.7	31100.3	29056.7	36091.7	30892.3	23436.3	23455.3	25734	13907	15447	18907	4619.5	13816	6880	19495.3	21184	22878	21326	22032.3	21546.7	23646	23319	25461.7	25074	25398.7	28255.3	27640.7	25384.7	21226	24020	20382	24530.7	5073	4800
S-adenosylmethionine synthase isoform type-2 OS=Homo sapiens OX=9606 GN=MAT2A PE=1 SV=1	6.05	44002.9	4283.43	P31153	17	42.53	0	METK2_HUMAN	33081.7	32421.3	32669	39545.7	38709	42422	35177.7	34652.3	38321.3	40164	42351	41199.7	34104.7	36007.7	29447.3	14983.7	14775.7	16852	18100	18680.7	18740.7	39603	39751	38517	34612.7	31646.3	32835.7	35158.3	38370.7	37106.3	33240.7	36375.3	39829.3	36427	32179.3	38626.3	21021.3	21144.7	22021.7	6922	5944
Small glutamine-rich tetratricopeptide repeat-containing protein alpha OS=Homo sapiens OX=9606 GN=SGTA PE=1 SV=1	4.59	34291.3	4281.17	O43765	7	20.45	0	SGTA_HUMAN	16414.5	12042.7	12481	32885	34940.7	40275.3	29066.7	33196	26201.3	28023	31818.5	25838.3	11602.7	13040.7	14094.7	11371.3	13234.3	14212.3	10755.3	15273.7	15244.3	23070	24590.7	26100.3	20235.3	17846.3	15675	25203.3	23659	28324.3	34435.7	23526	27675.7	18881	22566	27495.5	25596.5	22884.5	24608.5	24753	25591
Sorting nexin-3 OS=Homo sapiens OX=9606 GN=SNX3 PE=1 SV=3	9.15	18819.4	4276.35	O60493	7	33.95	0	SNX3_HUMAN				5868	5650	7343.33	3930	2069.5	4705.5													9897.67	9803.33	10179	10795.7	8914.67	8530	7271	7979.5	6987	7775.5	7770.5	8289	7014	3166	4717.5	5906		5680
Ras-related protein Rab-4A OS=Homo sapiens OX=9606 GN=RAB4A PE=1 SV=3	5.74	24674.8	4261.14	P20338	6	30.73	0	RAB4A_HUMAN	9832	10302.7	15602.5	5785.33	5963.67	6690.33	6986.33	6667	6090	9021.67	10429.3	10823	9908	8712.67	9843.33	13109.5	13337.5	10341	10839.5	10663.5	10298.5	5188.67	5132.67	4407.33	4824	4170.67	2546	6586.33	6529.67	5582.33	6916.67	6074	6453	8646	7008	7146.33	4284	5808	6595
Troponin C_ skeletal muscle OS=Homo sapiens OX=9606 GN=TNNC2 PE=1 SV=2	3.86	18179.2	4258.15	P02585	2	14.38	0	TNNC2_HUMAN																							6180	7129		1547		4395.74	10882	4370	2458.5	8217	4931	2689	1390.17	2930.87		3654.89	1896.73
Chloride intracellular channel protein 4 OS=Homo sapiens OX=9606 GN=CLIC4 PE=1 SV=4	5.3	29000.3	4252.81	Q9Y696	14	57.71	0	CLIC4_HUMAN	12835	12844.3	13171.7	30459.7	30547.7	51208.3	25727	26428	46987	30040	48175.3	29644	9654	10252.3	17762	6753.67	7190	9644.67	6987.67	7650.67	7630	31126	32700.7	33296	30515	25886.3	27534	36325	37071	33324.7	36743.3	36834	36629	25007	23530.7	26346	16809.7	15908	14930.3	9108.74	10792.3
Eukaryotic peptide chain release factor GTP-binding subunit ERF3A OS=Homo sapiens OX=9606 GN=GSPT1 PE=1 SV=1	5.32	56383.3	4245.42	P15170	22	58.32	0	ERF3A_HUMAN	5003.33	4913.7	4832.08	21899.8	22722.4	24484.6	18503.5	20753.4	20837.3	22942	26928	19852	8157.33	9346.33	10011	1021.89	3125.06	3814	3129.95	3464.56	3735.67	18279.7	17065.5	19207.4	16701.5	15617	16200	18505.8	17089.1	20307.7	24892.4	18467.2	21198.9	12109.6	11248.7	11259.9	8494.74	6527.6	7793.09	6818.16	7741.39
Interleukin enhancer-binding factor 3 OS=Homo sapiens OX=9606 GN=ILF3 PE=1 SV=3	9.05	95737.7	4238.24	Q12906	31	40.16	0	ILF3_HUMAN	29027.3	27657	28109	39454	39387	43138.3	33125.7	31736	36513	28932	35555.7	31064	27225.7	27820	29958.7	14833.3	14190.7	16871.7	14715.7	14621	16982.7	62036.4	64974.6	61660.7	50392.3	49611.7	48811.6	57039.7	55979	59984.3	89068.3	79967.7	74704.3	71162.3	78710.4	73737.7	41751.3	44626.3	46845	28608	32958.2
Small nuclear ribonucleoprotein-associated proteins B and B' OS=Homo sapiens OX=9606 GN=SNRPB PE=1 SV=2	11.74	24781.3	4235.41	P14678	6	26.25	0	RSMB_HUMAN	12441.8	11541.3	12066.2	24795.7	23889	13114	8162.33	8671	4789.67	11016.2	7758.67	12445	6404	6410.5	4750.33	12185.8	11555.5	6827.17	12369.8	12429.2	7534.83	20632.2	20687.7	26677.3	26014.5	19012.8	18769.7	16993.3	20123.8	22878.2	7906.74	20392.4	24731.3	29312.5	22783.5	26643.3	24300.7	25049.5	30301.8	15503.5	17380.2
Small nuclear ribonucleoprotein-associated protein N OS=Homo sapiens OX=9606 GN=SNRPN PE=1 SV=1	11.74	24785.2	4235.41	P63162	6	26.25	0	RSMN_HUMAN	12441.8	11541.3	12066.2				8162.33	8671	4789.67	11016.2	7758.67	12445	6404	6410.5	4750.33	12185.8	11555.5	6827.17	12369.8	12429.2	7534.83	9439.84	9478.92	12382.4	11653.8	8528.16	8413.96	16993.3	20123.8	22878.2	8659.26	22584.6	27390	29312.5	22783.5	26643.3	24300.7	25049.5	30301.8	15503.5	17380.2
Methionine--tRNA ligase_ cytoplasmic OS=Homo sapiens OX=9606 GN=MARS PE=1 SV=2	5.78	102313	4234.19	P56192	24	34.67	0	SYMC_HUMAN				29069	29841.7	33692	9761.67	9181	11894.7	3895	4314	3884	4747	4480.5	7215.33		3137				2956	40015.3	39405.7	38132	29370	22783.3	24023	8595	7877	7563		2811	2952.33	4296	2278.5	3034.67	5162	2699		7663	3758
Aldehyde dehydrogenase X_ mitochondrial OS=Homo sapiens OX=9606 GN=ALDH1B1 PE=1 SV=3	6.39	57662.6	4231.21	P30837	17	37.33	0	AL1B1_HUMAN	8206.24	8030.77	6858.13	20124.3	21638.7	22366	17803.3	18267	19179.3	21802.7	21659.3	20891.7	6001.67	5858.67	5059.33	2985.69	3521.52	2875		2032.4	7415	30944.7	30364	27591	29243.7	26935.7	25627	24905.7	25955.7	25156.7	27446.3	32363.3	30310.7	14662.3	11549	10068.7	4728.33	4806	5405.5
High mobility group nucleosome-binding domain-containing protein 5 OS=Homo sapiens OX=9606 GN=HMGN5 PE=1 SV=1	4.3	31524.6	4226.77	P82970	20	53.9	0	HMGN5_HUMAN	13028.3	11213.7	12286	11976.7	12421.3	20707	14080	13893	22551	11705.7	22389.3	12197.3	14849.3	14864.7	28377.7	22525.3	20484	24934.7	18222	17738	33234.3	12683	10328	12497.3	13692.3	12496.3	11892	15587.7	18109.3	19141.7	22172.3	21556.7	23307	28273	25355	26319.3	30850.3	27733	28807.3	26714.7	27265.3
DNA replication licensing factor MCM2 OS=Homo sapiens OX=9606 GN=MCM2 PE=1 SV=4	5.2	102581	4223.9	P49736	41	57.41	0	MCM2_HUMAN	9603.33	7643	9418.33	40071	38802	40030.7	41904.7	40165.7	43649	18421	21976.3	19762.3	8379	7582	11403.3	5962.33	9077.67	11434.7	8843	9388.33	13395.7	33316.3	34923.7	32896	28620	29495.3	30594	29149	30844	25537.7	14792.7	14713.7	13105	12412.3	12559.7	10772	13310	11773	12115	14368.3	9665
TATA-binding protein-associated factor 2N OS=Homo sapiens OX=9606 GN=TAF15 PE=1 SV=1	8.07	62058.1	4221.37	Q92804	14	33.95	0	RBP56_HUMAN	23014.8	21521.7	20432	16945.1	15163.4	18558.3	14566.2	13950.7	14939.4	17926	20578.6	17171.9	18925.6	17896.5	22064.5	21324.1	20784.3	21795.4	23477.4	24551.4	29719.3	29030.3	29764	31452	26642.1	62101.7	26406.8	33008.5	36658.3	39797.3	28828.3	35203.8	38196.6	48421.4	44172.4	41958.7	55500.2	44496.7	48653.9	47950.3	50887.4
Annexin A1 OS=Homo sapiens OX=9606 GN=ANXA1 PE=1 SV=2	6.67	38942.4	4220.3	P04083	16	53.18	0	ANXA1_HUMAN	8553	13814	15236	24961	24794.3	29345.7	25726.7	27909.7	28791.7	12735.3	15306	12656	11115.5	10035.5	9886.33	14229	17142	12831.5	20138	21746	8275.33	16341.7	16074.7	15800	13872	13196	13660	16700.3	15641.3	15085.3	7267.67	8189	8445	5042		1753	8451.5	7874.5	2768.5		4985
60S ribosomal protein L3 OS=Homo sapiens OX=9606 GN=RPL3 PE=1 SV=2	10.88	46394.1	4215.33	P39023	18	42.18	0	RL3_HUMAN	19017.7	17921.3	19699.3	44427.3	42202.7	49281	35963	48755	54622.3	25172.7	31702	26611.7	16219.3	14441.3	21459.3	11624.7	10096.3	10990	21966.7	22135	24712.7	37655.3	35738.7	35062.3	33506	26809	27885.7	32552.3	28678.3	26469.3	21703.7	21679	20339.3	14456.3	20013.3	18921	22560	37282	16717.7	15679.7	14557
Keratin_ type I cuticular Ha2 OS=Homo sapiens OX=9606 GN=KRT32 PE=2 SV=3	4.59	51825.8	4210.78	Q14532	10	18.97	0	K1H2_HUMAN				3151.68	2985.5	2341.33																3311.91	3091.9	3391.12	6800.93	7128.76	7022.72							4191.34	11374	3375
WD repeat-containing protein 1 OS=Homo sapiens OX=9606 GN=WDR1 PE=1 SV=4	6.21	66877.9	4197.2	O75083	23	49.34	0	WDR1_HUMAN	8669	12759	13373	49640.7	50740.3	53214	45212	48968	52942.7	38117.7	42605.3	41213	5906.33	6301.67	8441			3229	9174	7761	3121	37347.3	35239.7	35842.7	46530	44612	40634.7	37150.7	33849.7	31491	37292.3	28670	27377	13399.7	12942	8187.33	7771	8700	9450.33	8285	6692
Lysozyme C OS=Homo sapiens OX=9606 GN=LYZ PE=1 SV=1	9.34	16993.3	4171.36	P61626	3	14.19	0	LYSC_HUMAN																							4955				1053	4233.5	4233	7310.5	12105.3	11989.5	15303.7	8257	6043	5674	7740	3393	8833	10374.5	8096.5
Glutamine--tRNA ligase OS=Homo sapiens OX=9606 GN=QARS PE=1 SV=1	6.76	88711.3	4164.51	P47897	32	45.55	0	SYQ_HUMAN	5278	4694	5902	20632.7	20464	20455	10294.7	9490	10040	4678.67	5421	5776.67	7936	5227	5396	9570	9344	8495	5821	8425	8395	25045.3	26056	22870.7	18330.7	19225	19994	10847.7	9852.33	9900	5228.67	7287.33	5871.33	6766.33	5541.67	61243.3	7309	5371.67	3578.5
40S ribosomal protein S27 OS=Homo sapiens OX=9606 GN=RPS27 PE=1 SV=3	9.99	9803.3	4163.26	P42677	1	15.48	0	RS27_HUMAN			3958	12278	11130	13614	10746	9823	11223	6705	6489	7195		2735	3060				3875		4062	8157	9409	8601	6214	4668	4899	8943	8582	11075	7337	5809	5584	5624	6587	8427		4031
Creatine kinase U-type_ mitochondrial OS=Homo sapiens OX=9606 GN=CKMT1A PE=1 SV=1	8.37	47436	4161.77	P12532	17	40.77	0	KCRU_HUMAN	46966.7	49847.3	51709.7	24267.3	24683.3	24659	27227	28669.3	27919	39674	38836	39926	55301.3	55855.7	51721	72347.7	66076	69801	71532.7	71981.3	76263.3	36864	35826.3	34105.3	32209.7	32308.3	32365.7	41856.7	40288.3	33627	48658	51571.3	44364.7	50937.3	46538.3	35104	55431.3	56272.7	58324.3	47011	49125
High mobility group protein B3 OS=Homo sapiens OX=9606 GN=HMGB3 PE=1 SV=4	8.73	23151.1	4160.69	O15347	7	25	0	HMGB3_HUMAN	12758.5	9421	10733.5	8535.33	8712.67	10420.3	8979.67	8166.67	8337.67	9303.67	12175	9419.67	10421.3	10740	11627.3	12145.3	10335.3	15128	15886.7	14394.7	21647	12688.7	13233.7	13467	11375.3	10848	9382	16843	18032.3	17264	42146.7	15855	16501	20189.7	20230.3	37400.3	15664	16629	18416	8938	7123.33
Hepatoma-derived growth factor-related protein 2 OS=Homo sapiens OX=9606 GN=HDGFL2 PE=1 SV=1	7.39	74488	4148.55	Q7Z4V5	22	35.77	0	HDGR2_HUMAN	41524.3	44795	47934.3	29604.3	28914.3	29126.1	32270	30794	33915.7	24311.3	34275.3	30947.7	31410.3	32024	35054	28542.7	29655.7	38922.3	42014.7	41757.7	49692.7	28955	28403.6	27028.2	29912.5	29952.4	30542	32918	36921.3	31564.3	25947.7	40095	35375.3	41017.7	46853.3	26892	44708.7	53768.3	55733.3	33543.3	44486
Serpin H1 OS=Homo sapiens OX=9606 GN=SERPINH1 PE=1 SV=2	9.14	46554.7	4142.36	P50454	19	54.78	0	SERPH_HUMAN	29318.7	28045.3	29866	24364	25512.3	26273.7	28328	29535.3	29364.7	33159	33416	36564.3	30108.7	28186	29341.3	32437.7	31166	31788.3	39966.3	38208.7	38933	31162.3	30409.7	35177.7	25676.3	25903.7	25429.3	33445.3	34435.7	33157.3	36042	38122	40836.3	33749	31465.3	28620.7	28644.3	27707	27796	21980	23826.3
6-phosphogluconolactonase OS=Homo sapiens OX=9606 GN=PGLS PE=1 SV=2	5.67	27832	4126.29	O95336	10	50.78	0	6PGL_HUMAN	42099.3	38816.7	38646.7	28410.3	28676	29954	28271.7	28816	29760	34511.3	35533	34149.3	34918	36023	34622	37732.3	34841.3	35955	18252	17603.3	17413.3	21676.7	22556.3	17900	18387	16662.3	16793.3	28199.7	28838	22364	31013.7	31125.3	30422.3	34872	37673.3	33722.3	36204.3	40137.3	44190.7	7289	8086.5
RNA-binding protein EWS OS=Homo sapiens OX=9606 GN=EWSR1 PE=1 SV=1	9.54	68763.5	4117.65	Q01844	14	25.15	0	EWS_HUMAN	57019.7	58112.7	62651	45622	46306.3	55514	45728	46436.7	53817.3	57696.3	65265.3	58111	70913	73017.7	78013.3	83371	81336	84924.3	85934.7	87355	107278	72991.7	71663.3	60105	57791	56191.3	58234.3	82956.3	77232	70996.3	95896.7	94660	82989.7	92549.3	100483	88028	90533.3	97843.3	99063.3	74135.3	80782.7
Na(+)/H(+) exchange regulatory cofactor NHE-RF1 OS=Homo sapiens OX=9606 GN=SLC9A3R1 PE=1 SV=4	5.45	39153.6	4116.59	O14745	19	64.25	0	NHRF1_HUMAN	25258.3	22788.3	21880.3	20234.3	19189.3	18314.3	18424.3	18808.7	15843.3	21766.7	20337	21794	23927.7	24720.3	24953.7	21965	21724.3	23368	26568.7	24809.3	26838	16746	16305.7	13808	15278.3	15898	15445.3	25614.3	23016.3	23838.7	27174	26666.3	23026	29541	33336	28438	30929.7	36485.3	35919	27202.7	32081.7
Phospholipid hydroperoxide glutathione peroxidase OS=Homo sapiens OX=9606 GN=GPX4 PE=1 SV=3	8.37	22537.9	4106.86	P36969	7	38.58	0	GPX4_HUMAN	9372.67	9151.67	10154	30137.7	32321.3	34081.7	26977	25632.7	32127.7	21735	22129.7	21004.7	11374.3	10858.3	12558	9479	10403	11546	14826	13197	14146	40108	38848.3	27006.7	27262	33345.7	32387	34553	38410.7	21589.7	33268.7	37862.7	22652.3	17623.7	29694	27601.3	11128.3	19758.7	20056.3	14640	28467
Ras-related protein Rab-3B OS=Homo sapiens OX=9606 GN=RAB3B PE=1 SV=2	4.65	24986.1	4102.05	P20337	2	13.7	0	RAB3B_HUMAN						26821			13976		20366				9867.5											2598	2744.5
Ras-related protein Rab-3D OS=Homo sapiens OX=9606 GN=RAB3D PE=1 SV=1	4.57	24495.3	4102.05	O95716	3	19.63	0	RAB3D_HUMAN	58375	58629	58680	17065.6	16385.4	10262.4	17957.8	32790	16994	23186.5	11372.2	21255.1	52795	52294	15467.4	53243	57435	24340	51321	61325	21865	14455	12797	10385	6871	5895	8700	12175	10524	13476	18655	12335	15633	21863	21128	15542	26230	21830	21658	18428	16717
Ras-related protein Rab-3A OS=Homo sapiens OX=9606 GN=RAB3A PE=1 SV=1	4.66	25212.1	4102.05	P20336	5	31.36	0	RAB3A_HUMAN				367.739	384.558	997.799	189.488		1227.51	281.953	1329.68	544.756			1391.36	3309		5807	3623		6023	832.071	1349.29					823.953	1851.39		1362.23	991.129	602.531	921.539	1855.39	1858.95		3073	2868
Ras-related protein Rab-3C OS=Homo sapiens OX=9606 GN=RAB3C PE=1 SV=1	4.9	26180.4	4102.05	Q96E17	4	17.62	0	RAB3C_HUMAN	5801	4274	5330	4687.68	4614	3695.58	7381	6591	4352.49	9733	6783.77	5746.15	5113	5017	3847.51							2379.46	2343.71	2961	1375		1340	2383.52	2365.61	4611	2855.55	3985.96	3418.82	3360.73	3128.41	2460.1
Translin OS=Homo sapiens OX=9606 GN=TSN PE=1 SV=1	6.03	26297	4082.02	Q15631	8	29.39	0	TSN_HUMAN	22303	20111.3	21759	19782.3	20385.7	23632.7	23149.7	24236	27769	26935	31275.3	28358.7	33803.7	33103.3	37180.7	23689.3	27957	30357	20536	23247	20622.3	18853	18942.3	16319.7	18390.3	15744	18260	17128.7	17735.3	16971.7	13474.3	19064	16381.7	17573.7	15881.7	10356.3	14457.3	14710	16996	8633	7356
Keratin_ type II cytoskeletal 3 OS=Homo sapiens OX=9606 GN=KRT3 PE=1 SV=3	6.1	64588.2	4076.16	P12035	23	33.76	0	K2C3_HUMAN	4359.87	3915.18	4055.87	6131.25	5190.62	30276.2	7093.54	7123	16780.7	5541.69	22028	5891.15	3530.33	3881	7440.67	7855.3	5371.14	11377.7	5552	4967.33	6754.33	20835.3	22334	19103.3	36868.3	11701.7	41476.9	23713.7	22266.8	13628.7	4573.33	24784.5	14991.3	12243.4	16885.2	5069.09	9632.56	14071.3	14401.6	6388.26	13251.5
Probable serine carboxypeptidase CPVL OS=Homo sapiens OX=9606 GN=CPVL PE=1 SV=2	5.27	54449	4066.66	Q9H3G5	16	38.45	0	CPVL_HUMAN	37305.3	34455	36142.7	24983	25987	30027.3	25415.7	26158.3	32252.3	31370	37522.7	33635.7	33371.3	32718.3	40253	48199.3	43416.3	48472.3	41645.7	43856.3	49840.3	18355.7	20090.3	17191	15855	15408.3	16608.7	20014	20900	22135	27838.3	25723.7	24810	26558	27996	28074.3	27495.7	30302	30125	11604.3	11854.7
Actin-related protein 2 OS=Homo sapiens OX=9606 GN=ACTR2 PE=1 SV=1	6.33	45046	4051.51	P61160	16	39.09	0	ARP2_HUMAN	41424.7	42644.7	43254.7	38400.7	43589.3	45563	39142	42177.3	43514.7	52504.7	56170.7	50037.3	44494.7	48825	46953.7	22902.3	23378.7	22988.7	9816.67	12591.7	11721	32853	32613.3	35323	29431.3	33868.3	39365.7	35916.7	35417.7	39041.7	38454.3	34647.3	41867.3	43325.7	39618.3	36861.3	32537.7	32229	33357.3	8468	7500
Isocitrate dehydrogenase [NADP]_ mitochondrial OS=Homo sapiens OX=9606 GN=IDH2 PE=1 SV=2	8.91	51365.6	4050.31	P48735	16	31.86	0	IDHP_HUMAN	16826.1	15719	23392	25757.7	26353	25910.3	33975	32493	31785.7	25590	27361.3	27583.7	17355.5	17271.5	11103.2	4532	4832	5380			3726	41467.3	42070.3	31676.7	38158.3	40330.3	41893.7	28493.1	29341	23222.1	32053	31430.6	26388.2	16714.1	20483.5	19461.7	8622.19	10174.4	10562.6
Serum albumin OS=Homo sapiens OX=9606 GN=ALB PE=1 SV=2	5.89	71362.7	4043.12	P02768	17	30.05	0	ALBU_HUMAN	142037	110375	196460	166850	113681	294010	173020	158475	194808	94792.7	262476	195404	98730.3	185926	220670	165744	155634	235908	166129	155959	291216	52983	53439	47927	33502.3	29777.7	33309.7	55672	62891	61137.7	45036.7	61939.7	56149.7	64468.7	72966.3	23762.5	78769.3	63691.3	82043.3	80500	77737.7
Clathrin light chain B OS=Homo sapiens OX=9606 GN=CLTB PE=1 SV=1	4.38	25304.6	4025.63	P09497	10	34.06	0	CLCB_HUMAN	26086	25235	25587.7	14210.3	14030	17251	15168.7	14973	16882.7	18820.7	22630	21056.3	28559	27516.3	33257.3	34437.7	34721.7	40042	41853	42530.3	50409.3	11431	11728.7	15771	14908.7	17455.3	16474.3	15658.7	14547.3	19112.7	23388	22714.7	22872	33656.3	29365	29276.3	40324.7	31728.3	36359	50318	42992.3
Glycogen phosphorylase_ liver form OS=Homo sapiens OX=9606 GN=PYGL PE=1 SV=4	6.77	97548	3993.16	P06737	49	50.65	0	PYGL_HUMAN	31600.7	30287.7	28799.7	29433.7	27727	29384.7	35759.3	34294.3	35549.3	35969.3	37083.7	37577.7	28513.7	27648	29780	13058	13245.3	13114	8777.33	9984	8467.33	26207.7	26336.7	25400	26585.7	22465.3	26075	22943.7	23638.7	23752.3	16478.3	23331.7	22912.7	18799.3	20914	10039.7	17979	17338.7	18941.7	7509.22	8971.33
Acetyl-CoA acetyltransferase_ cytosolic OS=Homo sapiens OX=9606 GN=ACAT2 PE=1 SV=2	6.52	41864.2	3992.69	Q9BWD1	15	47.1	0	THIC_HUMAN	39704	35936.7	38357.7	32025.7	32442.3	29331.7	26302.7	27840	26835.7	36364.3	31096.7	36116.7	24135	23359.3	23835	36414.7	33398	27064	11125	11579.3	9642	12679.7	12450	12788.3	12043.7	15989.7	15765.7	13813	15954.7	13463.3	18411.3	12553.7	18234	21706.7	14599	15446	19150.7	19819	21956	8339	6309
LIM and SH3 domain protein 1 OS=Homo sapiens OX=9606 GN=LASP1 PE=1 SV=2	6.7	30116.4	3988.93	Q14847	16	62.45	0	LASP1_HUMAN	24458.3	22252.7	22643.7	17858	17514.3	19954.3	16987.7	17806	19230.3	20881.7	22808.3	20671	27076	26251.7	26608.3	24725.3	26749.3	27853.3	32833	32737.7	37868.7	13249.3	12640.7	11980.3	13147	12267	11235	16062.3	15310.7	14920.7	20209.3	21860.7	18868	21184.7	24551.7	20999	20454.7	23598.3	24212	23755	25861.3
Farnesyl pyrophosphate synthase OS=Homo sapiens OX=9606 GN=FDPS PE=1 SV=4	5.78	48788.8	3967.98	P14324	5	9.07	0	FPPS_HUMAN	9640.67	9347.33	8689.33	76819	73058	82040.3	72495.7	74195.7	80174.7	21248.7	23902.3	20225	9699.67	9553.67	12480.7	6757.33	8720	8455.33	9832	9304	11267.7	48887.7	48242	45241.7	44236.3	70515.3	67470.7	27671.3	29717.7	31700	2573	6048.5	6306.33	7734.33	2326	17144	8278.67	6683		10887.5	9700.67
60S ribosomal protein L35 OS=Homo sapiens OX=9606 GN=RPL35 PE=1 SV=2	11.68	14551.5	3955.15	P42766	3	21.14	0	RL35_HUMAN	14049	13209	13413	26526	31079	26115	22227	22931.5	20899	15052.5	15698.5	16176.5	12646	14154	11555	6735	6489	6368.5	15663.5	13110.3	12874.3	6737	6259	7097	5633	5229	5281	10656	10693	9829		4878	5020	4913						5265	7220
Protein arginine N-methyltransferase 5 OS=Homo sapiens OX=9606 GN=PRMT5 PE=1 SV=4	5.88	73368.3	3953.18	O14744	26	42.23	0	ANM5_HUMAN	23615	22217.3	22556.3	54309.7	50170.3	45902.7	56439.7	53075.3	58115.7	62695.7	65454	63865.3	22338	22007.3	22468	3585	3641.5	5152.33	4652.5	4790	5707.33	59027.3	60465	56300	51268.3	50292.3	50108.7	67400	68044.7	59309	57408.3	59857.7	56543	35136.7	29468	33267	13466.7	11291.7	13988.3	10572.7	10577.3
Ras-related protein Rab-4B OS=Homo sapiens OX=9606 GN=RAB4B PE=1 SV=1	5.72	23871.9	3953.06	P61018	6	31.46	0	RAB4B_HUMAN	5498.51	9519	8437	7499	6500	6081	7241	6609	5574	9444	8126.5	9780	5467.62	10251	7357	9502	9824	10607	12519	12480	13943	2441			2129.5	2530.5	2178.5
COP9 signalosome complex subunit 8 OS=Homo sapiens OX=9606 GN=COPS8 PE=1 SV=1	5.08	23282.7	3943.99	Q99627	6	37.32	0	CSN8_HUMAN	8896	8626.5	8883.5	7564.33	8048.67	8437	5359.33	8183.67	8710.67	8871	10395	8013.67	7099.33	7693.33	8780	10314.5	10005	9398	11413	10533	10207.3	9471.33	9473	7623.67	7409	6887.67	7316.33	8906.67	8534.67	6251.5	9008	10668	8323.67	10433.5	12747		11901	15982	12496	12817	17016
Transcription elongation factor SPT5 OS=Homo sapiens OX=9606 GN=SUPT5H PE=1 SV=1	4.77	121399	3934.84	O00267	43	48.94	0	SPT5H_HUMAN	13980	13782.7	14133.3	28154	29815.7	27620.7	25833	27091.3	29427.7	19748.7	21269.3	19787.7	14921.3	17296	14200	17047	16321.3	13860	18080	17043.3	16690	32016.3	30680	30002.7	27749.7	25465.3	26531.3	29054.7	27994.3	28428	17603.7	19967.3	22478.7	11757.7	10724.7	9377	9868.67	9167.67	9262.67	5883	10252
60S ribosomal protein L27 OS=Homo sapiens OX=9606 GN=RPL27 PE=1 SV=2	11.22	15797.8	3922.74	P61353	4	36.03	0	RL27_HUMAN	7765.5	8899.5	7185.67	22818	15856.5	23290	13557.5	19094	19633	11562.5	12011.5	16505	9886	9442	12380	5028	3819	6361	9665.33	9679.5	11553.5									3491
Gamma-glutamyl hydrolase OS=Homo sapiens OX=9606 GN=GGH PE=1 SV=2	6.76	36363.6	3911.18	Q92820	15	39.31	0	GGH_HUMAN	31653.7	28494.3	28148.3	17701.7	17585	19309.3	20441	19551.7	21538	18616.3	22690.3	21934.7	31547.7	22489.7	26252	36162.3	35707	36047	32766.3	33443.3	36517	16329.7	15799.3	16277.7	17531	15459.7	16040.7	16960.3	18953	18703	22196	25947	22805.7	28055.7	29267.3	21181.3	32085.3	32064	36222.3	16257	17308.3
DnaJ homolog subfamily C member 7 OS=Homo sapiens OX=9606 GN=DNAJC7 PE=1 SV=2	6.59	57239.3	3907.56	Q99615	25	49.19	0	DNJC7_HUMAN	14986.5	13610	11539.3	25978	22761	26319.7	23765	24215	26542	14367.7	18331.7	15109	13515	13285.3	16889	12432	10555.5	5689.5	9461	11873	11911.3	35892.3	26073.3	27285.7	22726.7	18521.7	17434	19084.3	28652	15450	14302	23668	16565.3	17780	22084	20461.7	9319.5	15091.3	22214.7	9014.5	14194
Eukaryotic translation initiation factor 3 subunit C OS=Homo sapiens OX=9606 GN=EIF3C PE=1 SV=1	5.36	106028	3892.95	Q99613	27	31.87	0	EIF3C_HUMAN	6519	5318.67	5975.33	42296.7	43139.7	44598	32628.7	33750.3	38239.7	9638.33	10961.3	9841.33	6872	7558.67	8269	3825	4643.67	6245.67	4794.33	4582	8020	53138.3	53051.3	50547.7	44437.7	44639.3	46053	29992	31945.3	27092.7	7606.67	10104	10281	12366.7	11419.3	7232	11494	9313.67	11800	10699.3	9328.33
Phosphoserine phosphatase OS=Homo sapiens OX=9606 GN=PSPH PE=1 SV=2	5.39	25178.8	3892.2	P78330	6	21.78	0	SERB_HUMAN	20777	21486.7	19669	35147.3	38676	43080.7	34237.3	35792	39724.3	34106	35923.7	34839	19381.3	17864.3	16449.3	21180	21887	19241	19101.3	20482.3	17576.7	10462.3	10767.3	11239	10917.3	8578	8955.33	15144.7	11831.7	15726.7	14814	14030.3	14861	21025.7	16478.3	15541.7	17761	19553.3	17965.3	11252	8105.33
DNA damage-binding protein 1 OS=Homo sapiens OX=9606 GN=DDB1 PE=1 SV=1	4.98	128223	3891.32	Q16531	46	40	0	DDB1_HUMAN	48978.3	45323.7	45469.3	26543	29474.7	31591	28473	30673.3	33170.7	39603.3	43317	41356.3	47075.7	44741.7	52826.7	56756.3	52176	43563.7	19854.3	19247	20345.3	30144.7	30497.3	29046.7	29787.3	25712	27305	37780.3	38786.3	37601	51685	50355	49471.7	60184.7	56819	53766.3	59129.3	57152.3	70969.3	24619	40760.3
CXXC motif containing zinc binding protein OS=Homo sapiens OX=9606 GN=CZIB PE=1 SV=1	4.73	18390.6	3889.82	Q9NWV4	7	68.75	0	CZIB_HUMAN	8833	15597.5	16575.5	15911.7	15950	19097	16448.3	16780	17114.7	19913	21375.3	21507	12337.3	12056.7	13620.3	10345	14082	12208	11903	11458.3	12822.7	17925.3	18614.3	17333.7	14528	13839.3	13057.7	14422.7	12427.7	13569.3	15494.3	25068.7	23771.7	16256	10060.3	9996	6529	4768	5627	6020	7336
Myosin light chain 1/3_ skeletal muscle isoform OS=Homo sapiens OX=9606 GN=MYL1 PE=1 SV=3	4.78	21202.2	3878.98	P05976	4	36.08	0	MYL1_HUMAN	75051	80419	76849	50979	62762	16508.3	49766	56197	23048.5	30912.5	18340.3	52427	40663	40994	20306.5	88612	47643	40040	43548	86444	47703	32027.3	31853	72372	52508	16369	47315.5	98847	99029	87727		56100.5	48051	55747	66181		130664	107939	142818	156428	141315
Developmentally-regulated GTP-binding protein 1 OS=Homo sapiens OX=9606 GN=DRG1 PE=1 SV=1	9.3	40827.3	3872.12	Q9Y295	15	42.51	0	DRG1_HUMAN	6599.67	6032	7545.33	22240.7	21190	25843	23963.7	25193.3	25675.3	20906.7	22809.3	22005.7	10117.3	9593	10478.7	5113		7724.67	6990.67	8085	9670	18087.7	16988	15721.3	23345	16105.7	21665.3	18284.3	17665	15915.7	14458	19521	14388.3	11461.7	17836.7	10883	10517	18659.3	19810	11675.5	14446.7
Eukaryotic translation initiation factor 4B OS=Homo sapiens OX=9606 GN=EIF4B PE=1 SV=2	5.37	69208.3	3870.6	P23588	28	47.14	0	IF4B_HUMAN	30022	28256.7	28428	24113	22968.3	37370.7	22422	22779.7	39021.7	27241	42260	22533	36134.3	32922.3	53594.7	42058.3	38227.7	51380	40334.7	43569	62565.3	25275.3	28779	32604.7	35239.3	29627	30327.3	38599.3	36383	45691	46966.7	43564.3	51059.3	62030.7	56242	54828.3	69703.7	52399.3	58823	74020.7	63559.3
Hexokinase-1 OS=Homo sapiens OX=9606 GN=HK1 PE=1 SV=3	6.38	103627	3869.82	P19367	30	33.7	0	HXK1_HUMAN	4736	4718	4018	17261.7	16460	20215.7	22492.7	24304.7	25440	22102	25882.3	24100.3	5352.33	4759.67	5969.33	9756	10941	3099	10126	11333	2182.02	43136.7	43124	45279.7	44114	35678	40780.7	39175	42787.7	40268	29545.3	27305.7	28900.7	11558.3	10534	9223	9937.67	8591.67	10264	8889.67	9015.33
Protein NipSnap homolog 1 OS=Homo sapiens OX=9606 GN=NIPSNAP1 PE=1 SV=1	9.66	33481.1	3867.53	Q9BPW8	13	51.06	0	NIPS1_HUMAN	6874		5001	12502.3	13775.3	16163.7	7870.33	10427.7	10894	8995	10103.7	7050.67				8255	6189	6174	4851	4261	8015	17249.7	18674.3	16786	13652.3	18191.3	19108	9568.33	8435	8364.08		6838.67	6839	4592.37	5098.67		4819	6468	5141	5807
Ran GTPase-activating protein 1 OS=Homo sapiens OX=9606 GN=RANGAP1 PE=1 SV=1	4.43	63998.3	3862.84	P46060	20	41.57	0	RAGP1_HUMAN	6093.67	6026	5942	16986	18704.3	21044	13067.7	13673.3	14160.3	9215	12135.3	10329	7056	7227.67	8603	6237	10029	10188.3	5127	4677.33	5487.67	38516.3	39575	37340.3	35838.7	32239	33112.7	33657.3	32813.3	31973.7	29846.7	25116	23850.7	17309.3	18680	14746.7	15173.3	15799	15891.3	13574	13399.3
Medium-chain specific acyl-CoA dehydrogenase_ mitochondrial OS=Homo sapiens OX=9606 GN=ACADM PE=1 SV=1	8.42	47044.6	3861.4	P11310	16	40.14	0	ACADM_HUMAN	26065.3	26345.7	27854.7	23512.7	23316	27763.7	24584	24225.7	26912.3	29543.7	32220	29249.3	30742	32135.3	31719	24212.5	29264	25520	23958	28160	18128.3	27047.7	26007	25726.7	24564.7	23884	26175	26841	26487.3	26625	32633.7	30096.7	30517.7	22259	24254	18263.3	13304	12114	12266.7	7677	5054
Myosin light chain 3 OS=Homo sapiens OX=9606 GN=MYL3 PE=1 SV=3	4.84	22103.2	3848.98	P08590	4	25.64	0	MYL3_HUMAN				4663	5024	2046	3994.5	4492.5	2133	5224.5	3053	5583				3869.5	4586.5	4103		4589	4184	14040.7	15946	10048.5		7746.33	8132	14777	15021	20375	10973.7	9160.5	13980	4836	13441.5		27002	25452.5	29414.5	20423	14465.3
Protein S100-A13 OS=Homo sapiens OX=9606 GN=S100A13 PE=1 SV=1	5.84	11471.2	3847.81	Q99584	6	54.08	0	S10AD_HUMAN	19700	18856.3	18574	9414.67	9626.67	12643	14153	14106.3	12991.7	10698	16652.7	12348	21142.3	21504.7	21584.7	18074	18086.7	19623	19703	19993.3	19991.7	8012.5	8592	5594.33	6042.33	7446	6776.5	10413.5	10585.5	7483.33	13084.5	11974	9934.67	11239	12353.7	11632.3	8312.33	11108.3	10319.7	10870.5	8331
26S proteasome non-ATPase regulatory subunit 1 OS=Homo sapiens OX=9606 GN=PSMD1 PE=1 SV=2	5.09	106863	3847.7	Q99460	38	45.96	0	PSMD1_HUMAN	19895.3	17187	18413.3	34825.7	31852.7	34982.3	34693	31755	32744.3	23459.7	27441.7	24985.7	27573.7	22247.3	24838.7	23262	20603	20623	24752.3	24233.3	25567.7	31694.3	31108.3	29557	26863	22570	22806	29990.7	28290.3	27883.3	25496	27119.7	31381	23298.7	17641.3	15208	19585.7	15389	17104.3	18263.7	17143.7
Isoleucine--tRNA ligase_ mitochondrial OS=Homo sapiens OX=9606 GN=IARS2 PE=1 SV=2	6.82	114761	3835.04	Q9NSE4	38	41.01	0	SYIM_HUMAN	16078	15521	13235.3	34457.3	33047	32392.3	36042.7	35038.3	32938.3	28568.7	28739	31443.3	20633.7	16946.3	16313.7	25803.5	18820.5	16485.7	29544.5	22136.5	16130.3	49007.3	48092.7	48392.3	43859.3	41391.3	42688.3	38088.7	37655	35984	24385	26757.7	25518.7	12537.7	10066	9354.67	7290.67	6858.33	7488.33
Ras-related protein Rab-12 OS=Homo sapiens OX=9606 GN=RAB12 PE=1 SV=3	8.51	27590.6	3818.89	Q6IQ22	6	22.13	0	RAB12_HUMAN				1994	2019	2344			2319		1962												3546	2866	3836	4223.33	1961	3276			3823	3055		2868	3072
Protein LZIC OS=Homo sapiens OX=9606 GN=LZIC PE=1 SV=1	4.68	21551.6	3816.93	Q8WZA0	16	62.63	0	LZIC_HUMAN	18471.3	16864.3	18362	13601	11735.3	14557.7	14523.7	12573.7	16829.7	14378.7	18837.7	15784.3	21032.7	20777.7	24179	20929	20014	29728	21222.7	23071.7	26507.7	9569.33	10121.7	11402.7	10638	8262.33	10716	12246	12613	12347.3	11456.3	11893.7	14314.7	18676.7	17457.3	16463.3	14508.3	13453.3	12919.7	13212.3	11842.3
Valine--tRNA ligase OS=Homo sapiens OX=9606 GN=VARS PE=1 SV=4	7.37	141731	3814.16	P26640	41	38.21	0	SYVC_HUMAN	23548.5	43370	23406	34088	31710.7	40951.7	27042	25184.7	32514.7	18114	21173.3	18308.3	12932	12395	16002.7	32083.5	23210	26916.7	31982	28504	29071	48726.7	46651.7	43779	36299.7	35033	37194.7	24245	26591	25356.3	13479.3	15207	17672.3	19013.3	17740	10217.3	22865.3	20137	21137.3	15805.3	16916.3
26S proteasome non-ATPase regulatory subunit 4 OS=Homo sapiens OX=9606 GN=PSMD4 PE=1 SV=1	4.49	40964.9	3812.86	P55036	11	31.3	0	PSMD4_HUMAN	23797	22737.7	22649	35465.3	35242.7	36853	30196.7	30038.7	29572.3	22001	21813	22500.3	17826.3	17937	17151.7	16817.7	16851	15996	21642.3	20426.3	19113.3	29188.3	29318	30570.3	21910.1	20100.1	21074.2	28398.3	28560	27764	30110.3	28291	28623	27871	32926.7	28753	25699.6	27107.5	26451	26718.3	24818.7
High mobility group protein B1 OS=Homo sapiens OX=9606 GN=HMGB1 PE=1 SV=3	5.45	25064.9	3800.28	P09429	7	29.3	0	HMGB1_HUMAN	84720.1	81550.3	78121.5	74585.4	70095	73869.3	84440.9	81694.2	78120	83310	87975.7	83150.6	103772	101784	98482	103885	94172	95807.3	126388	135370	128928	64168	77063.4	70022.2	68454.5	55372.7	55393.7	80026.2	73941	78454.4	76918.3	68244	75977.9	75828.8	73876	54945.6	83828.6	91265.2	95829.6	56118.3	70224.3
Ras-related protein Rab-30 OS=Homo sapiens OX=9606 GN=RAB30 PE=1 SV=2	4.71	23400.4	3798.92	Q15771	4	33.99	0	RAB30_HUMAN				23293	8049.67	2778	12358.5	11947	4119.5	8946	6500	11706										5182	6960		12606	12977	12876				3352	8051
Platelet-activating factor acetylhydrolase IB subunit gamma OS=Homo sapiens OX=9606 GN=PAFAH1B3 PE=1 SV=1	6.4	25848.3	3796.45	Q15102	10	68.83	0	PA1B3_HUMAN	7849.5	7158.5	7741.5	24585.3	23665	20127.7	22243.7	19826.3	16739.7	12386.3	10024.7	11750.3	8597.67	9389.67	9343	5648	6343.5	5578.5	8503.67	7863	7116	22177	20940.3	25973.3	20724.7	15987.7	17705	16567.7	17282	18351.7	7357	12440.7	16489.3	13753.3	10207.3	4668.67	11309.7	6642.67	12360.7		10036
Ubiquitin-conjugating enzyme E2 K OS=Homo sapiens OX=9606 GN=UBE2K PE=1 SV=3	5.16	22520.7	3795.53	P61086	10	57	0	UBE2K_HUMAN	17145	17522.7	17083.7	20802	23632.3	18984	21534.3	23523	14917.3	25820	27809.7	27829.7	20588	18245.3	16560.7	10611	9894	10707.5	10342.3	9441.33	10611.5	11926	13845.3	13009.3	13171	12913.3	11919.7	34584	17729.5	13913.5	27386.3	28847.3	22483.3	19674.3	19484.3	17725.3	5849	10375.5	12316.3	12609
Ras-related protein Rab-39B OS=Homo sapiens OX=9606 GN=RAB39B PE=1 SV=1	7.85	24850.3	3789.82	Q96DA2	4	17.37	0	RB39B_HUMAN	9744	10358.5	9391.5	58762	35901	46481	40829.5	90784	52936	20181	40233	38957	17357	18254.5	20885	6356	6785	12065	9516	10556	11097	28267.7	35356.7	29653.3	80601	43009.3	25513.3	32247.3	28584.7	39318.5	83715	26306	32634	17759.3	17328		20619.7	22965.5	18916.7	18370	17567.5
Caldesmon OS=Homo sapiens OX=9606 GN=CALD1 PE=1 SV=3	5.44	93288.2	3785.7	Q05682	31	35.69	0	CALD1_HUMAN	20111.3	18131.7	20132.3	13744	12868.7	18833.3	15154.3	14788.3	17612.7	16880.7	22958.7	17047.3	26372	26142.3	30010.7	23758	23288.3	27106.3	31599.7	30954	38138	16061	15244.7	15120	13156.7	11902	11884	15620.7	18838	18310.7	18766.7	21616	21466.3	24523.7	22030.3	18044.7	21149	20512	22171.7	25090.7	25581.3
Aldehyde dehydrogenase_ mitochondrial OS=Homo sapiens OX=9606 GN=ALDH2 PE=1 SV=2	6.7	56894.6	3783.71	P05091	19	39.07	0	ALDH2_HUMAN				10841	11020	13268.3	10601	10774.7	13407	12086.7	15919.7	13235.3	3338.18	3285.41	4983.43							20728.3	21171.3	15975.7	16806.3	15685.7	15771.7	16536.7	17403	14504.3	20251	24210	17025	11407.3	11027.3	9167.67	3732.29	4034.91	5069.42	1515.95	3330
60S ribosomal protein L13a OS=Homo sapiens OX=9606 GN=RPL13A PE=1 SV=2	11.56	23634.3	3774.11	P40429	12	40.89	0	RL13A_HUMAN	14996.7	13107.7	14071.3	26899.3	26674.7	29628.7	23862	24360.7	26750.3	17848	20258	19566	11524.3	11507	13199.3	11949.5	8910	7972.67	18910	20466	18373.3	8124	8784.67	7369.67	8904.67	7133.67	9451	7110.33	9627	5663.67	12409	6509.33	6016.67	5917.67	5638.33			4866.5	4927		7386
Pyruvate kinase PKLR OS=Homo sapiens OX=9606 GN=PKLR PE=1 SV=2	7.64	62229.5	3772.66	P30613	11	25.09	0	KPYR_HUMAN	34074.1	36502.4	32561.6	14082.4	13786.8	11839.7	12375.3	12561	11910.8	16986	16897.3	15811.9	6870.92	6804	7729.49	13644.5	18677.5	19646.2	20742.2	19564	22036.8	12314.2	11617.7	10802.1	11814.9	11637.4	12032.7	14533.7	16092.9	12135.9	4810.29	20968.7	16502.1	17625	22994.6	5652.67	23663.4	25048.5	26369.3	14907.7	16358
Thioredoxin-like protein 4A OS=Homo sapiens OX=9606 GN=TXNL4A PE=1 SV=1	5.45	16900.5	3769.79	P83876	8	69.01	0	TXN4A_HUMAN	10565.5	7985.5	8590.67	9401.67	8535	8300.67	10912	9456	8115.33	14130.3	13474	14267.7	9655	9518.33	8518	9122	7220	5794	6072	4407		7124.33	7789.33	7537	10504	11233.7	11419.3	11199	10776	21008	24060	10918.7	10552	18774	17511.5	13933.7	14837.5	13797.5	14538		5034
26S proteasome non-ATPase regulatory subunit 9 OS=Homo sapiens OX=9606 GN=PSMD9 PE=1 SV=3	6.54	24852.9	3766.71	O00233	7	39.01	0	PSMD9_HUMAN	15950.3	17268	15122	11272.7	10436.3	12305	9311	9219.33	10200.7	9935	12271.7	10864.3	15771.7	15575.3	18082.7	16942.3	16575.3	16428.3	20513	20180	21265.7	8913	8576	9486.67	9551.67	10830	7810	9358.33	10122.3	11595	13028	12383	12814.3	16899	16835.7	11610.7	19486.3	17234.3	18233	21950	18611.7
Myeloid-derived growth factor OS=Homo sapiens OX=9606 GN=MYDGF PE=1 SV=1	6.26	18909.3	3765.2	Q969H8	5	26.59	0	MYDGF_HUMAN	10070.3	12375.5	10175.7	11267.7	11064.3	13908	9533.5	7454.67	10719.3	9418.33	12384.7	12080.3	11459.7	11094.3	8744	12964	12207.7	12386.7	11708.7	12122	10459	22166	22210	21470.3	20128	18496.3	17860.7	24771	21524.3	20022.3	30304	27927	30510.7	34953.7	24566.7	26912	18347	21457.3	28016.7	9219	6705.33
Histone H2B type 1-A OS=Homo sapiens OX=9606 GN=H2BC1 PE=1 SV=3	10.99	14167.5	3750.42	Q96A08	3	27.56	0	H2B1A_HUMAN				10711.1	10173.6		20925.6	24054.7		16234.9		14837.4	22630.8	70717.6		9022.2	9746.5		8204.9	13440.1
ATP-dependent RNA helicase DDX3Y OS=Homo sapiens OX=9606 GN=DDX3Y PE=1 SV=2	7.33	73610	3736.26	O15523	23	36.06	0	DDX3Y_HUMAN	6341.93	5359.25	5627.28	13557.4	9453.84	11337.3	14109.2	12840.8	7120.01	10147.5	23778.7	15908.3	14893.9	13396.8	20371.8	7439.29	6868.07	9848.96	1358.77	3123.46	3618.84	7556.99	10713.2	9795.37	9539.04	7636.13	8719.88	9904.99	8455.96	7810.85	11095.5	10677.8	10185	12062.1	7029.36	28567.6	13953.9	17405.7	15889.6	13733	15890
Ras-related protein Rab-37 OS=Homo sapiens OX=9606 GN=RAB37 PE=1 SV=3	5.96	25043.4	3735.98	Q96AX2	4	30.04	0	RAB37_HUMAN	5163	4746	7317	2836	3042.33	3531	4314	2804.5	3159.67	4144.5	4188	4227.33	4887	5278	5313	6195	4775.5	5410.5	10345	10207	7580	5926.5	4405.33	4438.67	9064.67	16018.5	12604	3793.5	4452	2795.5	4121.5	4122	3580.67	4437.5	3728.5	5533	5374	5703.5	5110.5	8530	9417
Ras-related protein Rab-43 OS=Homo sapiens OX=9606 GN=RAB43 PE=1 SV=1	5.31	23567.5	3735.98	Q86YS6	2	7.08	0	RAB43_HUMAN																							3000						2983	5010		2923					7880	4397
Phosphatidylinositol transfer protein beta isoform OS=Homo sapiens OX=9606 GN=PITPNB PE=1 SV=2	6.47	31825.3	3731.52	P48739	14	52.03	0	PIPNB_HUMAN	14334.9	15076.3	14847.4	22549	25969	33909	23578.7	25799.3	22027.3	30856	37563	28923	14143	15726.7	12852	4912	5411	5415.33	4834.33	5159	5599.67	11498.3	14967.7	18902.2	18070.2	9908.5	13845	11967.7	16091.1	31476.6	26903	13980.4	18967	13974	12367	13340	6513.18	6544.33	7259		3762.5
Keratin_ type II cuticular Hb6 OS=Homo sapiens OX=9606 GN=KRT86 PE=1 SV=1	5.41	55154.5	3728.47	O43790	12	24.69	0	KRT86_HUMAN
Adenylosuccinate synthetase isozyme 2 OS=Homo sapiens OX=9606 GN=ADSS2 PE=1 SV=3	6.14	50496.6	3724.12	P30520	20	46.71	0	PURA2_HUMAN	40875.3	38688.7	36812	31264.7	32754.3	31500.3	27702	32096.7	29592.3	40597	43576.7	34940	30832	33522.7	32332	13229	12231.7	12686.7	7777.33	7290	7610.67	31710.7	33024.7	28798.7	26762.3	31625.7	33272.7	34443.3	36261.7	34025	39366.3	38708.7	36198	33491.7	39851.7	27827.7	22309.3	24911.7	28352.7	5006	4550.67
Hydroxymethylglutaryl-CoA synthase_ cytoplasmic OS=Homo sapiens OX=9606 GN=HMGCS1 PE=1 SV=2	5.06	57864	3717.52	Q01581	17	43.85	0	HMCS1_HUMAN	16010.7	15978	16841.3	27384.3	27621.1	25780.7	27086.3	28581.8	26430.1	34423.6	29167.7	35169.8	18042.3	17063	20842	3767	2917.8	4053.6	2951.98	3096.69	5667.33	43075.1	31352.3	30214	33540.3	23669	30930.3	42019	33741.7	46016.3	28323.3	48856.4	35256.3	22564.7	37770.5	17803	15045	12215	10871.7	9834	10091
Heterogeneous nuclear ribonucleoprotein A0 OS=Homo sapiens OX=9606 GN=HNRNPA0 PE=1 SV=1	9.65	31011.7	3705.6	Q13151	7	29.51	0	ROA0_HUMAN		3502	3798	14060	14746.3	20024.3	6181.67	8665.33	8461.67	5628.67	3411.33	5210.33	3136	3608.33	3720.33			2551	3944.5	4103	6065.67	20927.7	20003	24118.7	16224.3	18896.7	19058.3	9231	8415.5	11166	5364	4877.67	6292.5	6571	4547		4494			7169
Glutathione reductase_ mitochondrial OS=Homo sapiens OX=9606 GN=GSR PE=1 SV=2	8.56	56827.4	3703.48	P00390	17	44.44	0	GSHR_HUMAN	72090.7	70970	70999.7	54478	59794.7	62957.3	53857.3	57511.7	62649.7	65538.3	77993.3	67297	62943.7	63899.3	70047	72322	68620.7	61718.3	67370	79904.3	77522.3	52438.7	62156	61705.3	52116.3	30385.7	30453.7	69933	67791.3	68180	82795.7	76938.7	76850.7	79927.7	87949	60682.3	81972.3	82687.3	87071.3	47353.7	51797.3
Eukaryotic translation initiation factor 3 subunit D OS=Homo sapiens OX=9606 GN=EIF3D PE=1 SV=1	5.7	64600.2	3697.07	O15371	19	37.41	0	EIF3D_HUMAN				18896.7	20524	26050.3	10416	15041.3	21998.3	2578	2328										2844	26936.7	27752.7	30207.3	27969.3	21447.3	20113.3	7603.33	9098.67	12616.3				3344	2414				2799
Drebrin OS=Homo sapiens OX=9606 GN=DBN1 PE=1 SV=4	4.2	71885.6	3684.98	Q16643	23	41.91	0	DREB_HUMAN	17088	17148	67420.3	61184.3	24573.3	23074	79189.7	77429	75881.7	80551	72242	84985.7	95949.7	100271	22950.3	64533.7	61459	22920	33550	19198.7	19016.3	97315.3	48889.7	43027	134698	123328	110444	48020.7	80089.3	40006	53210.3	51872.7	47924.7	40568.3	42332.7	40902	28530	34050	34126.7	41949.3	41767.3
Splicing factor 3B subunit 6 OS=Homo sapiens OX=9606 GN=SF3B6 PE=1 SV=1	9.76	14699	3680.72	Q9Y3B4	2	20.8	0	SF3B6_HUMAN				9570	8927	10598	7342	8612	8387.5	6603	7116.5	6607	2389		2409.5							18008.5	16996.5	14895	15237	11629	11175	10507	8170.5	5243	7278	12029	7888
Vacuolar protein sorting-associated protein VTA1 homolog OS=Homo sapiens OX=9606 GN=VTA1 PE=1 SV=1	5.86	34164.4	3679.23	Q9NP79	6	20.85	0	VTA1_HUMAN				16183.3	29023.7	17057.3	16885	16094.3	15646	9928.67	11212	10800	3545.5	3509.33	4337.67			2817				15215.3	15220.3	15398	12336	10890	14211.5	13381.7	12233.3	12097.3	10001.5	11372.3	12394.3	6573	6152		4916.5	4089	4649.5
Keratin_ type I cuticular Ha4 OS=Homo sapiens OX=9606 GN=KRT34 PE=1 SV=2	4.82	50849.3	3676.6	O76011	12	25.69	0	KRT34_HUMAN																																	3573.5	4192.5			2224.64	904.658	2001.11
Phosphoribosylformylglycinamidine synthase OS=Homo sapiens OX=9606 GN=PFAS PE=1 SV=4	5.41	146388	3667.09	O15067	32	33.18	0	PUR4_HUMAN				39645.7	42414.7	48239.3	29686.3	33750	41208.3	8101.33	11332	7251.33		2976	6123.33						3569	44556.3	42065.3	38566	35074.3	37036	37128.7	22701.7	23916.7	25340.3	10123	10222	9043.67	8578.33	8262.33	8943.67	8999.33	9481.67	8549.67		5631
Actin-related protein 2/3 complex subunit 5-like protein OS=Homo sapiens OX=9606 GN=ARPC5L PE=1 SV=1	6.2	16941.2	3656.16	Q9BPX5	8	66.67	0	ARP5L_HUMAN	10647.5	12257.5	10292.7	6744.67	8182	5915	7372.01	6739.82	5884.67	10073.5	7443.33	11949	7903	7580	8798.67	9817.24	7168	6181.33	3117.99		3667.91	7668.33	5574.46	8694.33	8418.67	8194.5	6315.67	9799	9240.33	11580.3	15203.7	10721.7	12795	15611	11617.3	10708	8978.6	7388.67	13510.7
Phenylalanine--tRNA ligase alpha subunit OS=Homo sapiens OX=9606 GN=FARSA PE=1 SV=3	7.74	57620.8	3651.8	Q9Y285	17	42.52	0	SYFA_HUMAN	7199		4839	11008	14571.7	14538	9790.33	10820.7	11708.7	4247.33	6819.67	4002.33	6188	5007	4461		10245	10658	13716	10696	11338	15719.7	15251.7	15300.3	14782	11284.7	12338.3	13581.3	12949.3	14124	9372	10752.3	12646	12580.3	10944.3		35434	11304	16726		37553
Importin-7 OS=Homo sapiens OX=9606 GN=IPO7 PE=1 SV=1	4.51	120828	3647.88	O95373	24	29.29	0	IPO7_HUMAN	6226.5	6238	9076	16797.7	18809.3	21765.7	17674	21131.3	22662.7	17840	18909	17676.7	6490.33	7760	8230			3163			3427	17506	18388.7	18896	20054.3	17598.7	17707	20790	18761	18241.7	18539	12112	12070	9489	8405.67	7554	7764	5578	7274.67		3821
Keratin_ type II cytoskeletal 2 oral OS=Homo sapiens OX=9606 GN=KRT76 PE=1 SV=2	8.11	66411.1	3647.7	Q01546	20	28.68	0	K22O_HUMAN	2492.78	2489.6	2476.55	1554.04	2297.02	4527.61	1479.47	2065.96	2190.33	1920.76	1141.44	1843.08	3061.78	3311.69	2598.43	3720.41	3254.17	1759.59	2391.78	2382.84	443.576	452.079	1493.28	1219.19	1826.76	4015.24	4046.97	6057.67	2805.46	5209.58	381.772	460.307	1719.22	2289.63	5159.23	1290.53	6229.1	6695.01	7110.56	1093.94	1847.75
COP9 signalosome complex subunit 5 OS=Homo sapiens OX=9606 GN=COPS5 PE=1 SV=4	6.12	37807	3647.16	Q92905	16	59.28	0	CSN5_HUMAN	12673.3	10800	12697	26075.3	22642.7	18842.3	24259	23619	16879	21745.3	21144	22347.3	11807.3	13306.7	11259	6752	4553.5	6508				14816.7	14103.3	14512.3	11468.7	13231	12974.7	15099.7	13934.7	17353.3	19146.7	16243.7	20219.3	15787.7	12947.7	11328.3	8564.33	6508.67	7733.33
Peptidyl-prolyl cis-trans isomerase H OS=Homo sapiens OX=9606 GN=PPIH PE=1 SV=1	8.12	19493.3	3631.32	O43447	11	63.28	0	PPIH_HUMAN				5446.46	5231.08	12567.3	5745.32	4070.85	13155.7	5959	7424.5	6367.35	1806.82	1381.76	5113.5	155.366	157.506	2508	174.861	81.1036	2699	10361.7	11393	12324	8529.67	8835	8995.33	12335.3	13365	11503	7468.33	12642	12772.7	7944.67	6490		6600	5362	8492	6096	7956
Cathepsin Z OS=Homo sapiens OX=9606 GN=CTSZ PE=1 SV=1	6.77	34552.3	3631.29	Q9UBR2	5	18.48	0	CATZ_HUMAN	29058	29351	31553.3	22901.3	22900.7	31556.3	22424.7	22626	30027.3	28794.7	37205	27280.3	26387.7	27966.3	33281	28108	26551.3	33922.7	26567.7	26220	31395.7	13902.5	14237.5	15630.3	13151	11514.5	9115.5	17583.7	14297	17127.7	20669	11673.5	18023	17678	14151.5	17981	14760.5	13123.7	14354.7	13129.3	11953.7
Ras-related protein Rab-7a OS=Homo sapiens OX=9606 GN=RAB7A PE=1 SV=1	6.57	23774.9	3605.55	P51149	12	58.45	0	RAB7A_HUMAN	10334.3	9090.33	11526	11719	10466.3	12841	12670	9732.67	13607.7	16344.3	18368	17451.3	10633.7	10541	10506.7	8336.33	32055.3	8797.33	8211.33	6507	10531.7	20906.7	21766.3	21094	20355	18045.7	17313	17677	17424	14973.7	14404.3	16578.7	15930	16096.3	11619	11768.3	12363	14032.7	12479	4516	5055
40S ribosomal protein S15 OS=Homo sapiens OX=9606 GN=RPS15 PE=1 SV=2	11.02	17040.2	3604.89	P62841	3	40.69	0	RS15_HUMAN				8303	8868.33	9740.33	8644	6263.5	10180	6016.5	5407.5	5606		3010	3832						4425	1931	2231			1119	1603.5	1958			1787
SRA stem-loop-interacting RNA-binding protein_ mitochondrial OS=Homo sapiens OX=9606 GN=SLIRP PE=1 SV=1	10.99	12406.1	3595.93	Q9GZT3	3	34.86	0	SLIRP_HUMAN				7656	8605	5371.5		2251	1804													17798	18661	21146	9583	14586	14672	7454	7083	8233	6647	7017	8308	12051	11883	10044	15802	13373	14874	9438	9154
RNA-splicing ligase RtcB homolog OS=Homo sapiens OX=9606 GN=RTCB PE=1 SV=1	6.84	55723.7	3594.1	Q9Y3I0	23	52.67	0	RTCB_HUMAN	16951	16975.7	16703.7	38200.3	39427.7	55198.3	30411	35904.3	45297.7	20822.7	23791.3	19786.7	14635	16685.3	17619.7	12309.7	11217.7	10537	10351	9883.33	9369	34778.3	34717	32361	36888	37929.3	36763.7	39249	37150.3	36158	31181.3	26787.7	27899.7	23080.7	24202.3	21429	15316.7	17076.3	19308.7	6131.5	6833
Lipocalin-1 OS=Homo sapiens OX=9606 GN=LCN1 PE=1 SV=1	5.26	19421.1	3590.33	P31025	4	21.02	0	LCN1_HUMAN																						4026		4815				5646	6124.67	7615		3508	7348	6326	7980.5		15338	6921	11561.5	4817	9110
ATP-dependent RNA helicase A OS=Homo sapiens OX=9606 GN=DHX9 PE=1 SV=4	6.43	142270	3576.38	Q08211	43	38.9	0	DHX9_HUMAN			5164	32845.7	35530	33652.7	26165.7	27896.3	24751.7	15745.7	14754.7	16821.3	5816	5411.67	5604.33			4285	3757.5	3741	4447.67	59363.7	54353.3	50415.3	41765	39068	39556	37521	41651.3	38295.3	35139	30868	28010.3	16306.7	17027	15349	10237.7	9558.67	10921.3	6300.5	7066
60S ribosomal protein L10 OS=Homo sapiens OX=9606 GN=RPL10 PE=1 SV=4	10.73	25060.2	3572.31	P27635	9	33.64	0	RL10_HUMAN	10139	11891	8788.5	10236	8542.67	14473.3	11967.5	7679	12031	13566	9956.33	9610	6954.5	5793.33	6645	7402	8019	7115	14424	10367.7	11188	7447.67	9623.67	7696	10721	7653.67	7312	7140.67	7022.67	3807.33	6466	5150.33	4705.33	6749
Programmed cell death protein 6 OS=Homo sapiens OX=9606 GN=PDCD6 PE=1 SV=1	4.97	21925.5	3568.96	O75340	8	45.55	0	PDCD6_HUMAN	23523	16848.5	18711	30909	28700	27310.3	33935.7	31539.7	28913	31152	26328	33169	16048.7	14972.7	14529.3	18536	13558.5	11087	17279.5	15490.5	13393.7	22654.7	23577.3	26374	24715	20103.7	21358	20294.3	19801.3	21861.7	22368.7	20551.7	24769.7	16495	11642	13326.5	7896.33	5941	8035.33		3472
Mitogen-activated protein kinase 1 OS=Homo sapiens OX=9606 GN=MAPK1 PE=1 SV=3	6.57	41789	3564.35	P28482	18	49.17	0	MK01_HUMAN	12102.3	11440.7	10071.7	11971.8	10879.1	18252	13833.3	12794.9	19663.7	14171.3	19892	15283.7	10285	10710	17387	7576	3940	11926	10935	10512	15793	20455.9	21221.7	18326.7	17902	19484	19837	22779.7	22445.3	19954.7	12605	25253.3	25862.3	27314.3	23546	12350	20653	21089.7	19033	20670	22429
Serpin B6 OS=Homo sapiens OX=9606 GN=SERPINB6 PE=1 SV=3	5.01	42964.2	3561.68	P35237	18	57.71	0	SPB6_HUMAN	25367.5	27236.7	28447.3	18237	17785.3	22044.3	20725	19495	25820.7	25744.7	31911.7	27523	30183.7	25662	31673.7	7465.67	8613.67	9718	5134	4864	6194.67	21786.3	21010.7	21677.7	18266	17470.7	17502.7	22654	21363.1	17547.3	26983.3	27322.7	27711.3	24252.7	18382	13879.1	13311.3	10833.7	13602	2923	3250.5
Eukaryotic translation initiation factor 4H OS=Homo sapiens OX=9606 GN=EIF4H PE=1 SV=5	7.21	27442.1	3551.51	Q15056	17	64.92	0	IF4H_HUMAN	28551.7	27474	25127	41351.3	41417.3	47822.7	39031.3	40832.7	47615	34301	39359.3	36662	37261.7	38210.7	40866.7	31658.3	31778.3	33112	37030	38795.7	38745	56342.7	55091.3	51639.3	57639.7	59733	57742.7	54758	55372.3	52923.3	52478.3	55049.7	51565	48223.3	52585.3	41546	51415.3	55791	50252	32654.7	42584.3
Desmin OS=Homo sapiens OX=9606 GN=DES PE=1 SV=3	5.03	53592.9	3543.71	P17661	18	37.66	0	DESM_HUMAN	8876.61	10617	9595.95	6447.13	8596.03	6715.11	10275.7	10114.7	10350.4	10109.6	10494.1	10373.2	10411.6	10773.1	10872	41975.3	43948.8	19868.5	10842.1	11289.8	12424	6751.41	6798.15	5992.24	5674.62	4396.71	4379.01	6574.54	8569.07	6401.07	2653	7038.72	9607.43	10101.8	6143.69	5139.05	11213.6	8686.1	7974.96	18143.5	13554
Coronin-1C OS=Homo sapiens OX=9606 GN=CORO1C PE=1 SV=1	6.7	53933.5	3538.88	Q9ULV4	11	23.42	0	COR1C_HUMAN	10569	9432	9703	30679.7	29699.3	32208.3	31880.3	28881.7	32985.3	29090	31780	30453	12296	11532	7946.33			2735	3683	4008	5140.33	31929.3	32354	37811.3	37271.3	34043.3	46390.3	40996	40019	46369.7	38881.3	36460.7	42017	22474	21787	18160	11046.3	10555.3	10336.7	6857	6573
26S proteasome non-ATPase regulatory subunit 10 OS=Homo sapiens OX=9606 GN=PSMD10 PE=1 SV=1	5.7	24713	3523.7	O75832	7	37.61	0	PSD10_HUMAN	9216.33	8325.67	8346.67	23297.7	22202.7	27353.7	21696.7	20388	24102	11741.7	14426	13311.7	8530.33	7215.67	8454	9144	8218.67	9883.67	9189.67	7932.67	9217.33	20342.3	20272	18801.3	27439.7	28113	27295.3	15619.3	15704.7	17842.7	17218.7	16795.3	17238.3	15607.7	9829	8735.33	13161	9062.67	14396.7	8437.5	9901
Chromobox protein homolog 5 OS=Homo sapiens OX=9606 GN=CBX5 PE=1 SV=1	5.57	22396.1	3508.01	P45973	9	41.88	0	CBX5_HUMAN	9331	13078	9531.5	9483.67	9310	10449.3	10565.3	9322.67	11200	9971.67	11651.3	10809	9726.33	9483	11619	9493.33	8996	11727	9846.33	10493	14472.7	15111.3	12525.3	15519	18804	17450.7	16743.7	22523	17051	20131.3	20686.3	22609.3	28968	32558.7	24989.3	25154.7	27031	24671	30802	33286.3	35774.3
Proteasome assembly chaperone 1 OS=Homo sapiens OX=9606 GN=PSMG1 PE=1 SV=1	6.92	33652.3	3502.29	O95456	5	18.75	0	PSMG1_HUMAN	14437	12344	8981	10219	10967.7	20018.7	11216.3	10884.7	20265	12464.3	24301.3	13108.7	8951.67	9114.67	19343	6221	6270	9696.67	2978	3805	7999	20683	18707.7	18565	20606.7	17985.3	15954	19193.5	18444.7	18853	17320.7	23125.3	20495.7	26011	23527	24809.5	21152.5	16384.5	19580.5	10144	8295
60S ribosomal protein L23 OS=Homo sapiens OX=9606 GN=RPL23 PE=1 SV=1	11.19	14979.5	3494.77	P62829	5	35.71	0	RL23_HUMAN	7344.5	6885.67	7093.67	13579.3	14167.3	16708	11279	10626	11122.3	8392	9333.67	10546.7	7293	5071	6413	5398	6091.33	6066	9120	10192.3	9231.67	10153.7	9507.33	9142.33	9000.33	5710.67	5605.33	10596.7	10460.7	12486	10763.3	10365.7	10720.3	8481	7667.33	7961.67	5317	6011	4888	4841	4049
Keratin_ type II cytoskeletal 1b OS=Homo sapiens OX=9606 GN=KRT77 PE=2 SV=3	5.64	62186.6	3487.48	Q7Z794	21	31.49	0	K2C1B_HUMAN	30857.2	28499.9	26852.6	25593.4	24980.1	27604.7	27380	25622.4	33301.5	23686.4	28666.1	29919.2	56633	59318.5	71590.4	19830.4	18298.2	24030.2	34826.5	32676	40072.1	13382.9	13722	14876.6	20972.4	16575.8	16379.5	15087.3	14291.4	17604.7	13019.3	11129.3	10492.9	15771.8	13285.8	15577.2	20270.6	16665	16433.1	24218.5	17477.1
Protein NDRG1 OS=Homo sapiens OX=9606 GN=NDRG1 PE=1 SV=1	5.43	43291.8	3487.29	Q92597	10	41.88	0	NDRG1_HUMAN	6486.5	5834	6531	16324.3	14427.7	16895	16560.7	14685.3	17268	15893.7	16723	16929	6688.5	6750	5458.33	4432	4008	5682	5617.5	4882	5992.5	29266.3	28985	29158.7	23249	21486.7	21573.3	36614.7	35569.3	36288.3	34482	35747.3	37412.3	22266	21065	20248	14174.7	13735.3	14943.3	16105	11505.5
116 kDa U5 small nuclear ribonucleoprotein component OS=Homo sapiens OX=9606 GN=EFTUD2 PE=1 SV=1	4.66	110405	3483.34	Q15029	39	53.19	0	U5S1_HUMAN	39321.1	35902	36869	19872	20751.5	19002	23193.7	21448	21251	30395	31919.3	29520.7	39792	37465.3	37899.3	17153	16840.3	15603.5	8634.38	8700.8	9167.37	27820.8	27408.9	29571.3	22831.3	32749	19516	31370.8	33152.6	35585.7	34118.7	36653.9	42411	62399.7	61555.8	49328.7	51551	51359.7	52318.4	24636.4	22994.6
HD domain-containing protein 2 OS=Homo sapiens OX=9606 GN=HDDC2 PE=1 SV=1	5.19	23561.6	3481.52	Q7Z4H3	13	60.78	0	HDDC2_HUMAN	14660.3	12032.3	14301.3	11844	12744	16758	11342.3	11353.7	14397.3	13169.3	18305	13098.7	10717.3	12689.7	15305.7	10382	10357.3	12536.7	8515	8456.67	11006.3	10195.3	10832	11600.7	10405	7952	8676	12918	12331	14221.3	15245.3	13944	17067.7	17114.3	16146	19464	16131.3	15072.7	15718.7	10616.5	9402.5
Keratin_ type I cytoskeletal 18 OS=Homo sapiens OX=9606 GN=KRT18 PE=1 SV=2	5.17	48057.9	3480.65	P05783	22	58.84	0	K1C18_HUMAN	17791.3	15731.3	15835.7	17511.7	16984.3	19749.3	23066.3	22284.7	23831.7	19715.3	21197.7	20675.7	15185.7	14280.7	14153.3	14659	14025.7	13927.7	16768.3	16388	15333.7	33419.7	31104	29714.3	30347.3	23395.3	22942.3	36548.7	34677.3	33804	52312.9	46034.3	42753.3	24361.3	25730.3	23319.5	14327.3	13748.3	14306.7	11188	11503.7
Cyclin-dependent kinase 4 inhibitor B OS=Homo sapiens OX=9606 GN=CDKN2B PE=1 SV=1	6.12	14778.7	3478.13	P42772	2	13.77	0	CDN2B_HUMAN				827.903	1049.14	1797.12	472.684	528.4	1525	794.269	1986.12	811.24										2912.57	2288.75	1927.02	2000.43	1980.96	1992.36	2305	1455.82		1389.16	2408.05	1403.02		3133			2951
Flap endonuclease 1 OS=Homo sapiens OX=9606 GN=FEN1 PE=1 SV=1	8.89	42935.2	3475.65	P39748	13	40	0	FEN1_HUMAN	13000.5	19416	11782.5	26408	25200	31181.7	21108	19460.3	23900.3	13946	18610.3	14925	8260.33	11766.3	3841.33	12002	11722.5	8203.67	8385.33	18111	10307.3	28376.7	28337	25347	22169.7	21159	21516	18006.7	16790.7	17986.3	12379	10030	10650	12541.7	14896.7	4789	13591	13398.3	14946	15820.5	13675.7
Splicing factor 3B subunit 2 OS=Homo sapiens OX=9606 GN=SF3B2 PE=1 SV=2	5.38	100342	3465.01	Q13435	43	47.37	0	SF3B2_HUMAN	22907.7	23119	21342.7	29921.7	28803	33983.3	27634.3	31205.3	28382	27629.7	26948	28890.7	23293	22857.3	16491.3	21650.3	20347.7	16705.7	29060.3	28134	24343.7	56097	50348.3	52041.3	44284.3	43176.3	48933	50898.7	52629	53982.3	55466.3	53047.7	55426.3	29837.7	33964.3	26324.7	24669.7	19531.7	20730.7	27513.3	30597
BRCA2 and CDKN1A-interacting protein OS=Homo sapiens OX=9606 GN=BCCIP PE=1 SV=1	4.31	36321.7	3464.67	Q9P287	10	37.26	0	BCCIP_HUMAN	9223	10151.5	10696	15915.7	17066.3	18841.3	15965.7	15972	18289	19776	16410.3	15028.3	7380.67	8760.5	13597.3	6733.67	7562.33	15009.7	10062.7	8546.67	18663	20130.3	19722	21519	21563.7	16746.3	15426.3	19484.7	17167	19358	18319	18309.3	21304.7	13625.7	7803.5	7573			18381
Survival of motor neuron-related-splicing factor 30 OS=Homo sapiens OX=9606 GN=SMNDC1 PE=1 SV=1	7.12	26882.2	3453	O75940	7	40.76	0	SPF30_HUMAN	24571.3	31009.3	31531.3	19678	19059	17601.3	22825.3	26443.3	21001	32946.7	20586	32096.3	45872	40746.7	33796.3	25527	33964	25821	24709.7	23389	25606	24190	23863.7	22241.7	33264.7	26919	30468	24322.7	22175.7	22086	30183.3	33716.3	32845.7	35180.7	31375	28281.3	32299.3	29097.3	37479.7	50748.5	35935.7
c-Myc-binding protein OS=Homo sapiens OX=9606 GN=MYCBP PE=1 SV=3	5.61	11966.7	3452.83	Q99417	6	37.86	0	MYCBP_HUMAN	7962		8808	3358.5	3824.33	5407.67		3696.67	5425.67	3003.33	3598.67	3629.5	6130	6510	8315.67	14779	10170	10654.7	11317.5	13289	12109	9328.67	8989.33	9355.67	9187.33	8368.5	8356.33	8263.33	10788	10446	10500	12370.7	12008.3	13920	16579	11816.7	24608	21259.7	20852.3	31017	30008.3
Male-enhanced antigen 1 OS=Homo sapiens OX=9606 GN=MEA1 PE=1 SV=2	3.92	19904.7	3447.83	Q16626	2	15.14	0	MEA1_HUMAN	8872	7984	7549	10190	9360	9606	10308	9670	9296	9181	10087	10629	12298	13032	12343	8858	10505	11346	18673	16536	17455	7142	11217	6382.5	6319	11097	10695	7607.5	14266	13087	8390.5	9912.5	9448.5	17642	11081	16688	16344	18402	19747	5375	16590
Succinate dehydrogenase [ubiquinone] flavoprotein subunit_ mitochondrial OS=Homo sapiens OX=9606 GN=SDHA PE=1 SV=2	7.07	73718.1	3443.22	P31040	18	29.37	0	SDHA_HUMAN	25258.3	22814.7	22888	10241.7	10420.3	15067.3	10022	10306.3	16844.7	16591.3	22963	16254	24875.7	24451.7	26830	13290.3	11454.7	15132	6527.67	5892.5	7609.33	42554	45413.7	47093.7	42859.3	34186.7	37777	35743.7	36167.7	38631.7	36614.7	41524.7	45976.3	47061.3	44589.7	31145.7	30460	28562.7	30334	9275.67	7322.33
Coactosin-like protein OS=Homo sapiens OX=9606 GN=COTL1 PE=1 SV=3	5.35	16059.1	3436.45	Q14019	10	47.89	0	COTL1_HUMAN	9714.33	9887.33	10302.3	12752	12366.7	13696.7	12577.7	12858.3	12184.7	13903.3	16311.3	15490.7	11581	11359.7	11297.7	10160.7	9204.67	9126.33	9818.67	10734.7	10809	10907.7	10882.7	11025.3	11309.7	9834.67	9767.33	14726.7	13587	13624	16407.3	14838	15876	12994.3	13458.3	11455.3	12916	12021.3	11887.7	13793.7	12923.3
Hydroxyacyl-coenzyme A dehydrogenase_ mitochondrial OS=Homo sapiens OX=9606 GN=HADH PE=1 SV=3	9.44	34350.6	3432.42	Q16836	13	64.33	0	HCDH_HUMAN	4742			23862.3	25187.7	23858.7	24509.3	23962	23531.3	27880.3	26255.7	27406	12773	12366.3	4132.33							31239	30444.7	29485.3	25704.7	22489	20819	35090	33278.3	31961.7	27254.7	28921	30664.3	12495	10916.3	11423.3	4802.33		6531	3728	4255
Coiled-coil domain-containing protein 58 OS=Homo sapiens OX=9606 GN=CCDC58 PE=1 SV=1	7.85	16848.2	3430.43	Q4VC31	5	42.36	0	CCD58_HUMAN	13706	14017	13897.7	11141.7	10321	11064.3	11118.7	11263.7	10889.3	13874	13272.3	14007.7	17014.3	15990.7	16958.3	17274	16157	16797.3	20561.7	19851	20928.7	12985.3	13157.3	13841.3	11415.7	10088.3	9938	17003.3	16886.7	19360	16466	19410.3	22533	28094.7	24656.7	22019	28986.7	26091.7	27635.7	5853	10679.7
ATP-dependent RNA helicase DDX19A OS=Homo sapiens OX=9606 GN=DDX19A PE=1 SV=1	6.19	54431.4	3424.58	Q9NUU7	16	38.91	0	DD19A_HUMAN	4818.5	6894	4835.5	7299.89	7664.27	11729.7	2799.33	4335.5	5045.17	8671.67	5042.67	8825.33	3871.67	3749.5	1229.5	4310.5	3908		5588	5208.25		7428	7221.33	6911.33	7334.75	6944.08	6849.82	1998.5	2483.5	4508			2775.5	2087	1292.5
Actin-related protein 3 OS=Homo sapiens OX=9606 GN=ACTR3 PE=1 SV=3	5.53	47827.5	3420.74	P61158	14	44.02	0	ARP3_HUMAN	40517	41899.7	46620.7	35001.3	36804.9	39409.4	37682.3	38619.7	42017.7	42785	48603.7	46657.7	48512.7	47876	52980.7	21755.7	19690	21442.7	9072	9668	10228.3	36971	35601.7	33948.7	33651.3	30525.3	28954.3	40249.7	37406.7	33644	35710	44994	43312.3	43878.7	30790	27019.7	32452	32097.7	26107
Succinate--CoA ligase [GDP-forming] subunit beta_ mitochondrial OS=Homo sapiens OX=9606 GN=SUCLG2 PE=1 SV=2	6.07	46852.9	3420.23	Q96I99	22	45.83	0	SUCB2_HUMAN	4628		4216	17654.3	15813.7	21920.7	17224	15538	21233.3	7676.33	11565.7	8195	5250	5728	8694	3843		6883.5	4520	4679	7916	18348.3	19860.3	20629.7	19433.7	14301	18523.3	16198.3	18163	17151.7	7249.67	10550.3	8078.67	7025	7307.67	6515.5	6349.33	8849.33	9878.67	6037	6427.33
Transforming protein RhoA OS=Homo sapiens OX=9606 GN=RHOA PE=1 SV=1	5.75	22110.3	3418.24	P61586	5	33.68	0	RHOA_HUMAN	8221.5	7960	7213	31100	29813	28574	20641	31566	58086	14816	42430.4	18990.8	6729.47	5251.52	7988.72	4541.5		6060	3835.5	3971.5	5481.5																			7404.5	5957
Rho-related GTP-binding protein RhoC OS=Homo sapiens OX=9606 GN=RHOC PE=1 SV=1	6.21	22348.6	3418.24	P08134	5	30.57	0	RHOC_HUMAN	8221.5	7960	7213							7666.52	12068.3	8786.74	4854.06	4421.97	4360.64	4541.5		6060	3835.5	3971.5	5481.5	25506.5	26272	27717.5	10610.3	20559.3	19966	25879	26849.5	25694.5	31605	21809	24652	17829	19553.5	17727.5	13188	12696	14770	7404.5	5957
Peflin OS=Homo sapiens OX=9606 GN=PEF1 PE=1 SV=1	6.14	30666.1	3417.01	Q9UBV8	9	23.94	0	PEF1_HUMAN	8324.67	7937.5	7701	14793.7	16729.3	15988.7	16671.7	17359.7	17799.3	17121.3	18096.7	18267.7	6306	8015	7941	17675.5	16825	21196.5	4428.5	5038	4285	12527.7	12892.3	13793.3	13637	12964.3	10495.7	13828.3	13917.7	14535.7	16296.3	15909	17037.3	15295.7	15277.7	8788.5	8801.67	8264.67	9549.67	10642	16437.7
Early endosome antigen 1 OS=Homo sapiens OX=9606 GN=EEA1 PE=1 SV=2	5.42	163435	3410.95	Q15075	89	59.04	0	EEA1_HUMAN	38230	36183	38408.7	27215.7	30831.7	24342.3	22727.7	21586.7	23653.7	35633	29310.3	38308	35179.7	34816.7	36432.7	47571.7	43590.7	38550.7	43891.7	55966.3	47681.3	20774	19906	17195	18411.3	15886.7	18413.7	22991.7	23404.3	21572	23310.7	23895	24129	29277.7	37501.3	32908.3	34739.7	31358.3	35314	33778.7	38143.7
ATP-dependent RNA helicase DDX19B OS=Homo sapiens OX=9606 GN=DDX19B PE=1 SV=1	5.92	54383.2	3404.16	Q9UMR2	15	38.83	0	DD19B_HUMAN	4818.5	6894	4835.5	2182.77	2291.73	3507.34	2799.33	4335.5	5045.17				3871.67	3749.5	1229.5	4310.5	3908		5588	5208.25					1786.25	1551.98	1585.93	1998.5	2483.5	4508			2775.5	2087	1292.5
Diphosphoinositol polyphosphate phosphohydrolase 1 OS=Homo sapiens OX=9606 GN=NUDT3 PE=1 SV=1	5.97	19642.1	3399.88	O95989	3	23.84	0	NUDT3_HUMAN	7756		9415	13539	14172	17370.5	15324	15670	19316	16888	24425	15534	9590	12328	15398.5	56959	55350	63588	9442	9698	17948	5705	4937.5	5289.5	5819	7245	6717	13111.5	7628	8085	4663.5	6142	5907	31087	17497		4037	5811	4685
Replication protein A 32 kDa subunit OS=Homo sapiens OX=9606 GN=RPA2 PE=1 SV=1	5.73	29361	3377.87	P15927	8	48.52	0	RFA2_HUMAN	26406	28507.7	31919.3	42133.3	44116.7	35447	36547	39047.7	33653	40894.3	32866	38825.7	31306	33663.7	26747.3	11995	14849.3	10301	11967.7	12196.7	12118.7	30440.7	29188.7	34698.3	26323.3	24651.3	26739.7	21752.3	20252.7	19803	21623	28913.3	29016.3	32337	22930.7	17027	26231	14867	16146	11686	7173.67
Ras-related protein Rab-6A OS=Homo sapiens OX=9606 GN=RAB6A PE=1 SV=3	5.23	23706.9	3370.61	P20340	9	36.06	0	RAB6A_HUMAN	8368.33	6612.5	8261	7210.67	7662.33	5535.67	7041	8167	7474	9866	9483	7900.67	9039	9636.67	11010	11673	11044	10211	11590.5	7973	11717.5	5454.67	5564.33	5365	2812	3734	3896.33	6702.67	6813	6648.5	9002.33	9967.33	6861.33	10390.3	10648.7	9216	7909	8820.67	7598.33	12697.5	11847.5
BolA-like protein 2 OS=Homo sapiens OX=9606 GN=BOLA2 PE=1 SV=1	6.11	10287.6	3367.07	Q9H3K6	5	53.49	0	BOLA2_HUMAN					1958	3586		2426	2206		2609		3047					5313				3228.5	4586.5	5724.5	4478.5	6712	7001	7029	7263	4853	23616.5	4634	5098	4338.5	4143	24320	3416	3475	3171	4544	6398
Cold-inducible RNA-binding protein OS=Homo sapiens OX=9606 GN=CIRBP PE=1 SV=1	9.82	18648	3356.57	Q14011	5	30.23	0	CIRBP_HUMAN	3956			3949.33	5744	6316.33	2802	3288	5169.67	2853	6509.5	2571	6987.5	7445.5	8030		6233	6748	3830	8954.5	10097.5	11149	10556.7	10661.7	9895	8836.67	9143.67	15885.5	15087.5	14335.5	12190	15404.3	13020.7	17883	15348.5	18750	12408	13336	13303.5	21576	12324.5
Ribosome maturation protein SBDS OS=Homo sapiens OX=9606 GN=SBDS PE=1 SV=4	9.15	29048.7	3352.82	Q9Y3A5	18	52	0	SBDS_HUMAN	10745.3	9798.33	9973	34120.7	36529.3	40050.3	30231.7	31081.3	31068	17253	19443.3	17526	10390	10557.7	9111.67	7302.67	6905	7820.33	8782.33	7278.33	9268	24985	21636.7	26315.7	19511.7	16214.3	17058.3	22705.3	24227.7	24294	12739	13930.7	15580	16453.7	16211.3	14830	12521	10330	11156.3	7348	6462
Cleavage and polyadenylation specificity factor subunit 5 OS=Homo sapiens OX=9606 GN=NUDT21 PE=1 SV=1	9.22	26284.3	3347.43	O43809	13	51.54	0	CPSF5_HUMAN	13869.7	15015.3	16493.7	13944.3	13913	15343	14400	13775.7	15604.7	16415.7	19036.7	17372.7	14126.7	13228	14662.3	4394		3592.5			3770	29614	29936.3	27787.3	26065.3	26245.7	24682.3	25693.7	24690.7	25953.3	27767	31476	30657	30241.3	30088.3	28037.3	11204.3	11431	12675.3		4124
Glucose-6-phosphate 1-dehydrogenase OS=Homo sapiens OX=9606 GN=G6PD PE=1 SV=4	6.43	59713.1	3344.7	P11413	29	58.45	0	G6PD_HUMAN	13078.7	8450.33	10602.3	21125.3	23861	39044	21390.3	24964	46876.3	21980.3	36194.3	20491	15475.7	23154.3	50250	10386	24008.7	35347	12869	26471.3	32896.7	24868	24822	19611.3	19552.7	22723	26330	25372.7	27476	20420.3	15718	35238	20139	14070.7	22419.7	10009	10545.5	14207	15689.7	8718.67	17438.7
DNA-directed RNA polymerase II subunit RPB4 OS=Homo sapiens OX=9606 GN=POLR2D PE=1 SV=1	4.56	16425.4	3336.63	O15514	7	60.56	0	RPB4_HUMAN	5792.5	4234	4331	2019		4557.33			3852.67	2358	6740	3774.5	5154.33	3161.5	8040.33	5149.33	5314.67	7075.67		3594	3521	7527.67	7550.33	6248	5310.67	8142.67	7859	8325.67	8502	7306	10968	11616.7	10954	13416.7	9825.67	8648	16754	9509.5	12016	13691	11934
Keratin_ type II cuticular Hb5 OS=Homo sapiens OX=9606 GN=KRT85 PE=1 SV=1	6.22	57341.9	3335.97	P78386	9	15.38	0	KRT85_HUMAN	3765.38	3174.53	2784.81
3-hydroxyisobutyrate dehydrogenase_ mitochondrial OS=Homo sapiens OX=9606 GN=HIBADH PE=1 SV=2	8.15	35728.2	3330.58	P31937	9	35.12	0	3HIDH_HUMAN	16928.3	15065	15674.3	8834.33	9203.33	10067	9147.67	8891.33	9614.67	12129.7	14260.7	13287	17947.3	16917	17731.7	15692.7	13910.7	15455			3325	12216.3	12044.3	12147.7	11638.3	11634	11660.3	13243.3	12686	10643.7	16364.3	17861.7	18214	19588.7	20022.3	18886	15294	15536.3	14355
Isoleucine--tRNA ligase_ cytoplasmic OS=Homo sapiens OX=9606 GN=IARS PE=1 SV=2	5.77	145810	3326	P41252	44	40.02	0	SYIC_HUMAN	24291.5	22975.3	22026.3	42428.7	44618.3	49878.7	29118.7	29304.3	34768.7	24184.3	28042.3	16471.3	23063.5	17375.3	27750.7	19317.3	21167.3	29874	25430	28046	35018	34944.3	37042.3	33652.7	29867.7	28229.3	26837.7	16585	13090.7	10328.3	11270.5	9076.33	7895.5	9301.33	12341.7	10236	10258.7	21743.5	16547.3	16180	20147
TAR DNA-binding protein 43 OS=Homo sapiens OX=9606 GN=TARDBP PE=1 SV=1	5.8	45082.1	3323.76	Q13148	12	42.51	0	TADBP_HUMAN		7982	7301	20449	19980.3	23403.7	13925.7	13542.7	15713	8481.33	10598	9882	6290.67	5628.33	7775.5	4738		7959	6340	8680		39179.7	37905	33671.3	37650.7	28590.3	24886.3	16239	15219.3	14910.3	11269.3	12410.7	14794	10883.3	8281.67		11091	11704	10285.5	18022	14228
Serine hydroxymethyltransferase_ cytosolic OS=Homo sapiens OX=9606 GN=SHMT1 PE=1 SV=1	7.55	53653	3319.2	P34896	17	37.27	0	GLYC_HUMAN	15563.7	14889.3	14304.7	10407.7	11391.7	12354	13575.9	14186.3	16272	15282.3	18933.7	15042	15489.3	16114	18927.3	12347	12516.7	14512	8800.33	7136	9630.67	13293.3	13074.2	12511.7	23952.5	21027.4	20701	11145	12494.7	12341.3	17407.3	16085.2	17053	13828.3	13984.7	11705	10136.3	10528.3	10459.7		6705
Dynein light chain Tctex-type 1 OS=Homo sapiens OX=9606 GN=DYNLT1 PE=1 SV=1	4.82	12680.2	3309.67	P63172	2	30.09	0	DYLT1_HUMAN				9949	7760.5	7735.5	9510	6681	9575	4153.5	4650											12063	13359	10560	7782	11761.5	10617.5	10336	10286	10800	5142	9629	8549	6610	6853	4115		2809	6223
Serine/threonine-protein phosphatase 5 OS=Homo sapiens OX=9606 GN=PPP5C PE=1 SV=1	5.87	57449	3299.03	P53041	20	39.28	0	PPP5_HUMAN	34431	37542	39426	60545.7	54148.3	60186.7	37039	63528.7	67605.3	57827.7	58701.3	56211.7	42938.7	41040.3	51198.3	40648	58209	45737.3	63193.5	64220.5	59216.7	28831.7	29561.3	18895.7	33232.3	28827.3	29444	17160.3	15140.3	14761	12634.3	20561.7	13871	10433.7	7859	6680.33	6130.67	6286.67	4990.67	5327	5258
Centrin-2 OS=Homo sapiens OX=9606 GN=CETN2 PE=1 SV=1	4.71	19738.5	3296.15	P41208	9	57.56	0	CETN2_HUMAN						1837.5									2313			4622	4730	4107	5027	3196.5	2348	3224	2682	2603	2984	3147		3546	1174.68	2746	2559.05	6004	5555	4221	7161	6841	7016	11538.3	14254
60S ribosomal protein L4 OS=Homo sapiens OX=9606 GN=RPL4 PE=1 SV=5	11.69	47982.5	3295.77	P36578	16	35.6	0	RL4_HUMAN	25459.7	21476.7	27936.7	36663.7	33624	35963.3	39970.7	36006	33973.7	25462.3	26198.7	31481.3	27225.7	22280	21561.7	14589.7	21526	20324.7	27332	31458	30668.3	6027	7105.33	6577.33	5628	5462	5441.33	8159.67	7859.33	4886.67	4627.33	4574.33	5491	5987	5065	4566	5802	5358	5374.5		6121.5
Coiled-coil domain-containing protein 6 OS=Homo sapiens OX=9606 GN=CCDC6 PE=1 SV=2	7.01	53462.1	3294.07	Q16204	21	39.87	0	CCDC6_HUMAN	10849.7	12555.7	12294.7	10832.3	11751	10986	11525.7	11458.3	10298.7	13932.7	11481	14331.7	12656.3	11847	9938.67	14836.3	11762.7	11408	14693.3	16126	12053.7	8613.67	10966.3	10138.7	8615.33	6932	6855	9689	10139	11559.7	11515.3	11839.3	12890	13582.7	11680.7	7701.67	13199.7	12447	12448.7	13019	13325.7
Lamina-associated polypeptide 2_ isoforms beta/gamma OS=Homo sapiens OX=9606 GN=TMPO PE=1 SV=2	9.96	50727.3	3287.07	P42167	15	38.11	0	LAP2B_HUMAN	11877	14259.4	15873.8	14133.3	13607.3	16681.5	11924.5	11819.5	13688	13729.3	16982.7	12611.7	8827.71	12239.6	11899.7	19575.8	17717.3	17318.9	13115.5	9224.46	16037.9	13182.6	12075.7	11656.8	11491.4	12142	12902.3	16321.8	16239.5	14929.8	17859.5	16367.3	15628.8	17313	19738.3	17432.2	18911.2	20620.4	20053.4	13185.8	13648.2
Ras-related protein Rab-13 OS=Homo sapiens OX=9606 GN=RAB13 PE=1 SV=1	9.72	23002.3	3272.96	P51153	6	33.5	0	RAB13_HUMAN				4650.57	4288.09	5514.67	3750.36	3189.18	5106.81		3403.93	1971.93										2060.45	1598.62	1509.55	1035.36	1548.23	815.728	1966.57	1770.71	2020.99
60S ribosomal protein L38 OS=Homo sapiens OX=9606 GN=RPL38 PE=1 SV=2	10.81	8274.93	3268.87	P63173	4	48.57	0	RL38_HUMAN				2453	3124				3105				2631		2961							3898	4422	5297	7966	4357.67	4634	2718.5	2835.5		2137	2868.67	2548	3597
Ferritin heavy chain OS=Homo sapiens OX=9606 GN=FTH1 PE=1 SV=2	5.2	21396.8	3264.44	P02794	5	30.05	0	FRIH_HUMAN	18508.7	13376	16290	11832	10672	17839.5	11466	10486	17302	11642	20172	12828.3	14945.3	14244	22287.7	22410	22249	28210.7	25734.7	25603	35219.3	6217	6821	7413	6186	5766	3301.5	9857	8633	7576	12037	8595	9913	9205.5	12447	22166	11988	13275	8211.5	14995.5	15125.5
ADP-ribosylation factor 6 OS=Homo sapiens OX=9606 GN=ARF6 PE=1 SV=2	9.35	20196.3	3263.95	P62330	5	33.71	0	ARF6_HUMAN				7235.79	6171	7408	8351.18	7623.67	8235.83	3086.64	5587.33	4777.76	1003.72	907.749	1942.71							8654.17	8411.74	9256.1	4248.19	5873.33	6286	5466.41	5248.22	6032.66	4222.02	4118.95	3790.67	1607.62	2376.47
UDP-N-acetylhexosamine pyrophosphorylase OS=Homo sapiens OX=9606 GN=UAP1 PE=1 SV=3	5.92	59168.3	3257.72	Q16222	21	47.51	0	UAP1_HUMAN				12907.3	17094.3	14245.3	16117.7	17418.3	16045.3	12034	11218.7	12284.3	3353.5	4072	3518							14756.3	14229.3	12008	13747.3	12043	12425.3	13444	13636	11481.7	10376.7	10201.7	10135.3	4980	5075.67	5229.33	4113	3004.5	4358
Presequence protease_ mitochondrial OS=Homo sapiens OX=9606 GN=PITRM1 PE=1 SV=3	6.49	118439	3238.02	Q5JRX3	36	39.54	0	PREP_HUMAN				16131.3	17530.7	20083	11936	11890.3	14692.7	7605.67	10087.7	7639.33	3574		6096			7928			8559	31326.7	34923.7	34527	35248.3	29638.3	29780.7	23221.7	20290	26047.3	13687.7	15245.7	20460.7	12181.3	10194.7	7693.33	8101.67	7297.67	8257		5135
Aconitate hydratase_ mitochondrial OS=Homo sapiens OX=9606 GN=ACO2 PE=1 SV=2	7.35	86166.9	3218.75	Q99798	29	42.05	0	ACON_HUMAN				30303.7	32006.7	30425	25402.3	27632.3	25491.3	4234	4554	5861										27205.7	25354.3	25382.7	23075.3	19644.7	24603.3	19918.3	19641	19663.3	4672	5181.33	6467.67	5123.67	6099.33	3707.67	4666.67	4561.33	4512		4579
WD repeat-containing protein 61 OS=Homo sapiens OX=9606 GN=WDR61 PE=1 SV=1	5.04	33751.7	3214.58	Q9GZS3	12	43.93	0	WDR61_HUMAN	14254	10673	14265	15629.3	14994.3	16693.7	11204.3	9956.33	10003.3	8628	12096.3	11035.7	8972.33	9635	12064.7			2783	3829		3149	14330	11497	10219	13416.3	14596	16174	9272	11820.7	11800.3	9803.67	7158.67	13139.3	14122	14489.7	11534.3	8844		3164
ATP-dependent 6-phosphofructokinase_ liver type OS=Homo sapiens OX=9606 GN=PFKL PE=1 SV=6	7.25	85817	3211.99	P17858	26	37.05	0	PFKAL_HUMAN	23556	24984.7	28000.4	29498.7	29617.7	27351.7	30744	31136.3	29625.3	31746.7	30939.2	35155.3	31850.7	30037.3	28024.7	20906	20598	21117.5	10659.7	10433.1	10658.7	21837.6	20545.2	19820.7	18829.7	17206.3	16736.3	20209.8	19711.4	17752.1	16436.5	18618.5	17385.7	15793.6	16338.5	14194.4	12445.3	13004	11038.3	3852.19	7777.05
Phosphoribosyl pyrophosphate synthase-associated protein 2 OS=Homo sapiens OX=9606 GN=PRPSAP2 PE=1 SV=1	7.22	41325	3206.78	O60256	17	56.1	0	KPRB_HUMAN	18694.2	18669.4	18572.3	11805	11210.3	13085.2	15877	15083.7	13391.7	21043.3	24782.3	21328.7	17021.3	20462.4	16324.7	7807.5	6910.33	8813.67		3779	3706	13461.3	14930.3	7847.21	10479.3	7266	10519.7	6832	7580.33	6161.61	8069.67	17157	8122.65	7663.51	6412.6	9630	9000.34	7892.61	5905.55
60S ribosomal protein L8 OS=Homo sapiens OX=9606 GN=RPL8 PE=1 SV=2	11.63	28252.8	3201.82	P62917	11	38.13	0	RL8_HUMAN	18666.3	18709	19169.7	31724.3	30786	32372.3	32412.3	33634.7	36221.3	26100.7	27386.3	25748.7	22847.3	21960.3	24173.7	12131	12842.7	12978	27549	27648	29117	6047	6050.5	4636.67	5770	7243	5179.67	8930.33	10476	11880	8154.5	8497	9144.5	7810.33	7932.5	5733	7758.67	8706.5	8747	9341.67	8288
Alpha-taxilin OS=Homo sapiens OX=9606 GN=TXLNA PE=1 SV=3	6.13	62233.4	3185.13	P40222	22	46.7	0	TXLNA_HUMAN	15833	14608.7	15199	22117.3	21313	24603.7	20042.3	19962.7	22951	18349	24588	19216	21982.7	19223	25785.7	16412.7	14566.7	15911.7	13690	12671	15419.3	32812.7	34270.7	32203.3	28564.3	25555.3	26616	33581.7	40187	32935	29508	32271.7	27514.3	22463.7	36188.7	20426.3	21109.7	25999.3	24963.3	21711.7	28381.7
Leucine-rich repeat flightless-interacting protein 1 OS=Homo sapiens OX=9606 GN=LRRFIP1 PE=1 SV=2	4.39	89880.5	3179.66	Q32MZ4	34	40.84	0	LRRF1_HUMAN	22442.7	22887.3	23880.3	16206.3	15896	18440.7	13174.3	13281	16662.3	16052.7	22677.7	18532.7	25783	25161	31734.7	26805	27254.7	33173	31341	30735.7	39334.7	20119	12853.7	11515.3	15136	13058	12255.7	10637	12291.3	10755.7	16059	17531.7	23275.7	21213.3	21082	20015.3	23963.3	25624	27761.3	38237.7	50468.3
DNA replication licensing factor MCM4 OS=Homo sapiens OX=9606 GN=MCM4 PE=1 SV=5	6.31	97128.4	3173.6	P33991	31	46.23	0	MCM4_HUMAN	6969	7266	5563	38675.3	39157	30480.7	30098.7	31540.3	28553	13129	11160.3	14156	5362.33	4934.33	5342.33	4783.5	4603.5	3985	4617.67	5158	5152	30703	33403.7	29409	25857.7	26748.7	27173.7	15461.7	19747.7	17139	11486	11152.3	9445	8756.67	9985.33	9336	8059	8665.33	8927.67		6255.5
Ras-related protein Rab-33B OS=Homo sapiens OX=9606 GN=RAB33B PE=1 SV=1	6.82	26059.7	3167.1	Q9H082	3	19.65	0	RB33B_HUMAN	10382			3742	2723	5603	2396	2773		3485		3371	4626	4564								18944.5	17989.5	16185	6067	16835.5	33926	17026	4812		25520	40962			8819	12122
Peripherin OS=Homo sapiens OX=9606 GN=PRPH PE=1 SV=2	5.21	53765	3166.56	P41219	17	33.19	0	PERI_HUMAN	161075	175115	158625	103858	101112	103709	131017	121394	131700	145775	168153	164068	168744	169941	190964	42891.5	115072	136339	192273	172885	215868	10033.8	10044.3	8639.58	6527.17	6514.32	6839.27	11542.1	11086.5	6734.9	13750.3	13410.8	13741.5	15686.7	8147.58	8167.38	22241.8	22899.7	19666.9	4549.03	3849.06
T-complex protein 1 subunit zeta-2 OS=Homo sapiens OX=9606 GN=CCT6B PE=1 SV=5	6.92	58391.8	3166.1	Q92526	10	18.49	0	TCPW_HUMAN				5228.62	5982.74	6592.33	4221.22	4307.12	5507.94	4149.85	5752.31	4389.31	20000.4	20359.6	21435.4	11251.1	17771.8	10565.8				6115.12	6292.84	7167.98	6473.34	6626.43	6878.87	5555.76	6321.56	5823.21	3726.91	6885.44	6263.18	27692.7	53872.5	33056.3	28171.7	31816.3	19009.6	3459.43	2726.76
Fascin OS=Homo sapiens OX=9606 GN=FSCN1 PE=1 SV=3	6.9	55157.3	3157.87	Q16658	16	39.96	0	FSCN1_HUMAN	13419.7	11178.3	10849	16487.7	17220	24418.3	15999.7	17159.7	20302.7	18653.3	20848	20384.7	10892	10086	9105.33	7720	4885.5	5607.67	4788	4419	4093	26904	27593.3	26015.3	25046.7	22563.3	21729	33350.3	31944	30199.3	30706.7	30897.7	30465.3	24064.3	25126.7	22594.7	16829.3	13720	18443.7	7019	6954
Platelet-activating factor acetylhydrolase IB subunit beta OS=Homo sapiens OX=9606 GN=PAFAH1B2 PE=1 SV=1	5.52	25740.4	3154.8	P68402	5	29.69	0	PA1B2_HUMAN	9268	7774.5	8076	18848	19464	15541.7	15269.3	16169.3	14439	11813.3	10912.3	12568.3	4328.67	5390	6881	5423.5	9644	7802.33	8078	8801.67	7279.33	12239	13157	12992	17742	14317	14006.7	12518.5	13247	11539	10741	11139.7	11661.5	10093.5	5688	4302	6267		7115	8440	8234
Luc7-like protein 3 OS=Homo sapiens OX=9606 GN=LUC7L3 PE=1 SV=2	10.45	51865.4	3140.66	O95232	17	33.8	0	LC7L3_HUMAN	7781.33	7437.67	8683	11928.7	11682.3	13639	13810	12589.7	15129.7	10713.3	12177.3	11170.3	9268.67	10439.7	11160.7	6107	4784.67	6005.67	5859	4743.33	7531.67	26448	25189	26810	29425.3	24176	25669.3	20013.7	21892.3	19582.3	22464.7	24081.3	21024	20285	22965.3	20979.7	19117	19527.3	20819.3	11660.7	10473
Exosome complex component MTR3 OS=Homo sapiens OX=9606 GN=EXOSC6 PE=1 SV=1	5.99	28520.3	3138.18	Q5RKV6	7	26.84	0	EXOS6_HUMAN	6338.5	4372.67	6163.33	2504	2106	2947		3551.33	4256.67	5838.67	6906	6104.67	6309	6929	7268	3357	4398.33	5073.67		3956	4097	6611.67	7311.33	6468.33	6165	6429	6434.67	10216	9644	10004	10119	11359.3	10638.7	12448	13219	12630.3	14061.3	12723.3	13575.7
60S ribosomal protein L7a OS=Homo sapiens OX=9606 GN=RPL7A PE=1 SV=2	11.31	30166.7	3132.49	P62424	6	21.05	0	RL7A_HUMAN	16053.3	15133.7	15760	16687	15620.7	15543.7	17656.7	17783	15425	12292	14726.7	16534.7	15114	17233.3	16774.3	6734	9709.33	11152.7	14431	13445	13923	5992	5385.5	4911	5255.5	6650.5	6018.5	5007.33	5529.5	4706.5		6712.67	13854	9704	6896.67	17391	5561.33	4261	3552		4082
COP9 signalosome complex subunit 1 OS=Homo sapiens OX=9606 GN=GPS1 PE=1 SV=4	6.33	56107	3132.31	Q13098	15	29.74	0	CSN1_HUMAN	8474.33	9061.67	9731	12675	12901.7	17106.7	12355.3	13449.7	18087.3	18467.3	21814.7	17547.7	8892.33	9437	11705.7	3748	4525	4657	4091	3923	4353.33	16301.7	16398	16121.7	15108.3	12475	11096.7	18237	18113.3	16001	13653.7	15908.3	15226	12764	13251.5	13432	7184	5589.67	7347	4664	3568
Annexin A11 OS=Homo sapiens OX=9606 GN=ANXA11 PE=1 SV=1	7.62	54732	3130.01	P50995	16	32.87	0	ANX11_HUMAN			4382	31558.3	31051.6	34965.3	31663.3	32288.2	35033.6	14361.7	13428.3	16220.3	4048	4871	9576.67			9327			10311	25264.3	26142.3	28360.3	27625.3	20906	20091.7	29497.7	30138	25255	14072.7	17426	15105	9882.33	8794.67	4723.5	10562	9820.33	9610.67	10209.7	9373
ATP synthase subunit d_ mitochondrial OS=Homo sapiens OX=9606 GN=ATP5PD PE=1 SV=3	5.02	18548.3	3125.77	O75947	9	47.83	0	ATP5H_HUMAN	13292	8835.5	12696	9272.33	12479	8540.33	17555.5	18702	14565	19312.5	7479.5	19080	18073	18964.5	8054.5	13266	10708	8087.5	6925.67	7932	7332	9239.5	7642.33	7673	9691	6244.33	15109	5173	8460	11447.5	8045	8068.67	9498.33	11880	9650		7640.67	6011.5	5685	21124.3	9733.33
Ras-related protein Rab-39A OS=Homo sapiens OX=9606 GN=RAB39A PE=1 SV=2	7.59	25405.9	3125.7	Q14964	3	13.36	0	RB39A_HUMAN				6740	3377.5	4036.5	7113	5764	4739		2969	2705										4255	4434.5	3075	4485	6806.5	3764	6612	6369		2476	3615
60S ribosomal protein L27a OS=Homo sapiens OX=9606 GN=RPL27A PE=1 SV=2	11.62	16675.5	3115.36	P46776	3	19.59	0	RL27A_HUMAN	16653.3	13834.7	13363.3	37111	32687.3	37900.3	30900	28885.7	31457.3	23921.5	24806.7	21044.7	8718.67	12259.5	9226	9411.67	10963.5	10177.7	20708.3	20380.3	20048.7	9363	11049	7192.5	6925	6120	8041	7193	7529	10251	4777	4936	7535.5	8320	8176.5	4447	15306	7777		9195.33	12547
Putative peptidyl-tRNA hydrolase PTRHD1 OS=Homo sapiens OX=9606 GN=PTRHD1 PE=1 SV=1	9.55	15919.5	3111.68	Q6GMV3	3	21.43	0	PTRD1_HUMAN	12519	12671	13176			12594		8963	10387	11358	12251	13943	13424	13348	13378	10967	11078	13650			11936	8984.5	9330.5	8901	9755.5	9882.5	8930.5	11154.5	13267	11565	18007.5	13268	15695.5	16688.5	13348	7829	18527.5	15503.5	14974.5	4748.5	12155
Pachytene checkpoint protein 2 homolog OS=Homo sapiens OX=9606 GN=TRIP13 PE=1 SV=2	5.69	48893	3107.89	Q15645	16	42.59	0	PCH2_HUMAN				16931.3	19044.7	20665.3	13012.3	13493	14290.7	6080.33	5784.33	6483	3480	2538	2768			6259			6716	15804	15919.3	16124.7	12831.7	13018.3	13564.7	9209.67	8860.67	9581	3345.5	3019.67	3830	3401	2860	3483
NPC intracellular cholesterol transporter 2 OS=Homo sapiens OX=9606 GN=NPC2 PE=1 SV=1	7.63	16912.4	3100.73	P61916	2	11.92	0	NPC2_HUMAN	22747	17480	19236.5	11227	14463	14073.5	7579	13284	12501.5	31490	23665.5	18069	25579	32247	25762	19172.5	24504	21124.5	23864	29741	26784	8782	9700		8060	6977	8383	11698			15817	14195	12652	16963	18691	24087	19468	22156	20097	20248	19744
Annexin A7 OS=Homo sapiens OX=9606 GN=ANXA7 PE=1 SV=3	5.36	53024.5	3098.62	P20073	17	31.76	0	ANXA7_HUMAN	13504	5915	11042	32368	31145.3	33000.7	30732.7	30710.3	33224.3	24413.3	29243.7	23867	7535	5564.5	7660	9092	5367	5142			3082	23592	24111	21370.7	13951	13845	14321.7	20992.7	22713	22263.3	15619	16469.7	15737.3	6309	6390	5725	5955.33	8416.33	5820.33
Platelet-activating factor acetylhydrolase IB subunit alpha OS=Homo sapiens OX=9606 GN=PAFAH1B1 PE=1 SV=2	7.04	47208.3	3084.91	P43034	21	54.88	0	LIS1_HUMAN	47250.7	46590.3	47252.3	31520.7	26067	34225.3	44433.7	44934.3	56425.3	36519.3	46855	38247	61443	64881.3	71444	43494.3	40864.3	47445.7	37092.3	36057.7	43064.3	41853.3	46749	55136.3	58046.7	38568	55445	39941	35540.3	54364.3	30570	39982	42819	41535.3	40098.7	31760.3	37072.3	34093.3	35848.7	6535.33	11690.7
Histone deacetylase 2 OS=Homo sapiens OX=9606 GN=HDAC2 PE=1 SV=2	5.53	55934.6	3055.69	Q92769	16	41.8	0	HDAC2_HUMAN	5008.46	7267.28	8117.6	23978.5	23805.6	33160.9	23308.3	22916.9	30936.2	16498.5	22002.7	19562.9	7319.41	6995.46	11132.6	3665.91	4235.38	5624.48	5114.37	5008.82	6710.2	38689.2	40608	42811.3	31570.3	29173.1	26618.8	34912.2	33885.3	27170.3	30008.2	30164	29884.9	21066.8	17404.4	15592.9	10671.4	12582.1	9519.62	11040.5	11986.8
Sorting nexin-2 OS=Homo sapiens OX=9606 GN=SNX2 PE=1 SV=2	4.85	58585.3	3054.85	O60749	22	44.89	0	SNX2_HUMAN	7685	7112.67	7920.33	19597.4	20047.8	21652.9	20773.3	22504.2	23430.6	13799.3	15089.7	15111.3	7811.33	7233	9690.33	4422.33	6610	5326	5993.33	6331.33	6555.67	17803.3	16600.3	14585.7	13734.7	14210.7	13847	14403.7	15819.7	15339.7	11765.8	11688.7	9513.55	5837.22	4797.67	3610.67	6341.14	5852.4	5485.77	7041	7428
Carboxymethylenebutenolidase homolog OS=Homo sapiens OX=9606 GN=CMBL PE=1 SV=1	6.82	28390.4	3054.72	Q96DG6	14	46.12	0	CMBL_HUMAN	16116	16988.3	17389.7	29435	29832.7	19695.7	32557	30842.7	25058	33510.7	29384.3	36595	18294.3	17354.7	10970.7	8786.33	8262.33	7258	9409.67	8772	6290.67	17717.7	17404.3	19334	20083.7	19289.3	30748	16398	17523.7	15307.7	17113.7	15148.7	20208	14466.3	9917	4815.5	11976		7557.5		9943
Paraspeckle component 1 OS=Homo sapiens OX=9606 GN=PSPC1 PE=1 SV=1	6.26	58857.8	3052.12	Q8WXF1	22	54.3	0	PSPC1_HUMAN	12138.3	13194	14061.7	16349	18749.3	19718	16327.7	18234.3	14959	13660.7	10223.7	12120.3	16326.7	15523.7	10053.7	7161.33	11676.3	10192	13336.7	12335	10649.7	27927.7	29882.3	26204	27305.7	26797.7	29676.3	19435.3	19691.7	18745.3	21849.7	25597.3	21196.7	22793	22474.3	28154.7	23586.7	19154.3	21972.3	24521	24758.7
NudC domain-containing protein 2 OS=Homo sapiens OX=9606 GN=NUDCD2 PE=1 SV=1	4.8	17847	3043.01	Q8WVJ2	4	28.66	0	NUDC2_HUMAN	9107	8938	8665	9947.33	12203	16812	9877	11391.5	9316.33	6607	6267	6873.5	6526.5	5986	8391.5	7277	7445	7371.5	9363	9304	8246	12052.7	12809.3	10856	13083.7	13408	13117.5	7522	6769	8992	5617.5	7521	7393	7708.33	7864.5	8829	10399	8216.5	9702.5	14722.7	14350.3
Histone acetyltransferase type B catalytic subunit OS=Homo sapiens OX=9606 GN=HAT1 PE=1 SV=1	5.38	49911.9	3041.28	O14929	12	33.65	0	HAT1_HUMAN	7214	8444	9548	23223	21894.3	19565.7	22744.3	24253.7	26197	16551.7	19701	15448.3	7224	6980	6499.67	7960	7089.5	5379.5	5664	7466	4225.5	14267	13480	17792.7	14887.7	16117.7	16589.7	7764.67	7881.67	12038	6160.67	8684.33	6173	3242	2543			2702	2824
Kinetochore protein Spc24 OS=Homo sapiens OX=9606 GN=SPC24 PE=1 SV=2	4.46	22535.3	3037.68	Q8NBT2	7	60.91	0	SPC24_HUMAN				11407.3	13983	14009	10315.5	8576.33	9098.33	5954	4665.33	6703.5		2905	2344							9970	7371	6853.33	12488.3	12106.3	11336.7	12272	10379	10960	8868	4824	9622	4333				4549	3852
Coatomer subunit delta OS=Homo sapiens OX=9606 GN=ARCN1 PE=1 SV=1	5.85	57666.7	3030.3	P48444	21	40.31	0	COPD_HUMAN	84133	97709.3	89151.3	112313	128874	114114	112948	116081	129499	113859	134839	112041	83087.7	100796	107163	59669	66890	75533	76197.3	80617	96670.3	117403	103455	94247.7	88808	78865.3	103106	119131	137749	85115.7	134373	122839	92813.3	83607.3	120535	17052	80320	114517	75050.7	50532.7	67446
RRP15-like protein OS=Homo sapiens OX=9606 GN=RRP15 PE=1 SV=2	5.21	31655.3	3027.07	Q9Y3B9	11	38.3	0	RRP15_HUMAN	9721.67	8845.33	8381.33	2433	2616	2934.67	2320		2636	4133.67	4724.67	4241.67	7675.67	6835	5522	12680.7	12545.3	9704.33	15020.3	14586	14220.7			3577				8106	7763	9650.33	19940.3	19097	22323	40224.7	37667	34797.3	48244.7	45775.7	53113.3	45536	57047
Immunoglobulin kappa constant OS=Homo sapiens OX=9606 GN=IGKC PE=1 SV=2	6.13	11936.1	3025.91	P01834	2	35.51	0	IGKC_HUMAN																												2173	2492		3763	3502	3567				4595	4172	3878	7345	8006
GTP-binding protein SAR1a OS=Homo sapiens OX=9606 GN=SAR1A PE=1 SV=1	6.27	22480.9	3012.91	Q9NR31	7	50	0	SAR1A_HUMAN				1606.23	2147	2208.23	6890.5	6767	9990.5	1827	2264	2029.25										13621	18335.7	20915.2	13517.3	8614	11874.7	8114.82	6487.45	12901.4				2119.25	1315	3064.5
3-mercaptopyruvate sulfurtransferase OS=Homo sapiens OX=9606 GN=MPST PE=1 SV=3	6.17	33463.6	3011.66	P25325	10	50.84	0	THTM_HUMAN				7308.33	7066.67	8990	5318.33	5622	6088.33	3718.33	4551.67	3024.5										9843.67	10935.3	9410	10674.3	12100.3	11755.7	9525	9036	12534	6714	6022.33	6633.67	2928	1959			3642
Cyclin-dependent kinase 4 OS=Homo sapiens OX=9606 GN=CDK4 PE=1 SV=2	6.59	33958	3008.19	P11802	10	45.21	0	CDK4_HUMAN		5692	6862	13564.7	15278.3	12944	13256.7	4439.67	12124.3	9508.67	9758.67	7605.67	6916.5	7052.5	4924.67							15219.3	17059.3	15953	14028.7	14027	14362	15834.7	16200	13519.7	9728	13055.3	12431	7824.33	8735	6131	3930	6673	7035.5		6801
Short/branched chain specific acyl-CoA dehydrogenase_ mitochondrial OS=Homo sapiens OX=9606 GN=ACADSB PE=1 SV=1	6.6	47827.7	3005.42	P45954	16	41.67	0	ACDSB_HUMAN	12325	11049	11453.7	18978.3	19149.7	19837	18817.3	19826.7	20417.7	21117	21701.3	22066.7	12007	11553.3	12572.7	6708	5890	6142	6675		6482.5	27297.7	27973	27263	23989.7	23007.7	24305.3	31588.3	44751	23928.7	25892	23149	22610.3	19552	17239.7	15218	14849.3	15695	14616.7	17543	9981
U6 snRNA-associated Sm-like protein LSm5 OS=Homo sapiens OX=9606 GN=LSM5 PE=1 SV=3	4.21	9994.54	3004.92	Q9Y4Y9	2	31.87	0	LSM5_HUMAN	7005	8112	7182	6053	4586	4634.5	5253	5473	6814	6207	5990.5	8389	3597	3356	5331	8694	10244	10567	12453	12836	15308	7976	8322	10422	6897	4180	4025	9855		12156			12621	16828	12381	11526	14081	9718		17857	13662
Methionine adenosyltransferase 2 subunit beta OS=Homo sapiens OX=9606 GN=MAT2B PE=1 SV=1	7.02	37894	2955.15	Q9NZL9	15	45.81	0	MAT2B_HUMAN	18313.7	18382.3	17996.3	17246	17456.3	17266.7	16933	16398	16691.3	19936.3	17657.7	20973.7	12521.7	13127	12952	3703.33	3850	3840	3607	3861	3862.67	15196	16271.3	15547.3	13775	12409.7	12189	16903.7	18630	17796.7	16969.3	16512.7	16860.3	16379.3	16269.3	15595.7	10254.3	11542.3	10811.7
Calpain small subunit 1 OS=Homo sapiens OX=9606 GN=CAPNS1 PE=1 SV=1	4.87	28486.9	2955.06	P04632	8	39.18	0	CPNS1_HUMAN	22653.6	21224.7	21977.4	18357.1	18419.3	21333.9	21383.6	20915.7	25450.8	23656.6	30446.9	21406	27909	24843.3	28559.3	11473.7	10305.9	10343	7740	7081.67	7835.33	11466.3	12767.3	14314.6	9553.85	8205.62	9186.97	13713.6	14044.1	15692.5	16544.4	17883.5	18770.9	19284.3	17327.1	15560.1	12048.3	9579.02	11174.3	9928	6830.5
Cytosolic iron-sulfur assembly component 2B OS=Homo sapiens OX=9606 GN=CIAO2B PE=1 SV=1	4.9	17777.1	2953.81	Q9Y3D0	6	55.21	0	CIA2B_HUMAN				6994.33	7462	7676.67	6038.33	5070.67	5767.67	2411	3250.5	3959	3473	3519	3313			3255			4351	8049.33	7625.33	7017.67	7014	7821	7834.33	5788.67	5675.33	6302	4908.67	5072	6153	7177	4956	6907		9427	8053		4061
Eukaryotic translation initiation factor 2 subunit 3 OS=Homo sapiens OX=9606 GN=EIF2S3 PE=1 SV=3	8.43	51679.8	2942.04	P41091	15	41.95	0	IF2G_HUMAN	43983.3	36909.3	40615.3	40195.3	35826.3	38417.7	34016	31822	25906.3	37889	31750.7	42428	18174.3	17625	11394	29039.7	25838.3	23232.3	26810	26199	22842.3	35480.7	27017	38044	35918	32160.7	24863.7	28273.3	21356	35191.3	30538	27995	38021.3	30468.7	21885	22508.3	17440	17248.3	21309.7	15187.5	18369.5
Keratin_ type II cytoskeletal 7 OS=Homo sapiens OX=9606 GN=KRT7 PE=1 SV=5	5.22	51442.8	2933.16	P08729	16	30.92	0	K2C7_HUMAN	4881.8	4143.98	2541.35	3176	3035.94	2302.25	2691.64	2610.02	2602.33	2877.29	2989.69	2926.55	3878.35	3713.98	6427.52	2475.88	2857.08	2986.66				2921.88	1721.35	1814.59	4028.6	3713.25	3569.28	686.638	1487.17	813.029	1759.43	1863.59	2828.67	3827.73	2238.62	3909.96	5902.58	5360.99	4050.72
Ubiquitin carboxyl-terminal hydrolase 5 OS=Homo sapiens OX=9606 GN=USP5 PE=1 SV=2	4.72	96698.9	2928.84	P45974	34	47.67	0	UBP5_HUMAN	14474	14361	14726	27267.7	26630	30307.7	29072.3	28561.3	28571.7	23907.3	27398.7	28956.7	16557	16475.3	14353	11955.3	11293.3	11315.3	11015	12403	12736	19563.3	19998.7	18919.7	18551.7	17279	18528.3	20457.3	20606.3	21770.7	20214	20964.3	20870.3	17602.7	17334.7	15417.3	13002.3	11769	15290.7	8559.67	9779.67
Tubulin beta-1 chain OS=Homo sapiens OX=9606 GN=TUBB1 PE=1 SV=1	4.89	50897.3	2925.99	Q9H4B7	9	21.29	0	TBB1_HUMAN				1579.11	1855.02	2289	1569.17	639.156	1843.85	1625.63	1687.62	2261.93	1913.41	1852.81	2662.94	4595.49	3774.15	4726.39	2762.63	2821.55	3591.68	1865.09	1904.9	2598.71	1557.11	1321.1	3420.22				535.318	1183.15	1969.98	3528.27	1351.01	258.106
V-type proton ATPase subunit G 1 OS=Homo sapiens OX=9606 GN=ATP6V1G1 PE=1 SV=3	9.24	13871.6	2920.55	O75348	5	44.92	0	VATG1_HUMAN	7734	7272	8098	9645	9979	11538	9747	10517	12755	11085	14242	11133	11257	12108	8090	4165	3860	5528	5973	5957	8175	6829.3	7164.49	7055.51	7326.39	6948.64	7056.54	8124.91	8110.4	7390	7373.94	10024.3	15476	14514.5	9665.5	7942.33	10007	7641.33	8955.67	14580	16440
Tyrosine--tRNA ligase_ mitochondrial OS=Homo sapiens OX=9606 GN=YARS2 PE=1 SV=2	9.33	53427.2	2916.5	Q9Y2Z4	16	43.4	0	SYYM_HUMAN				8398.67	8294.33	8220.33	4247	3750	4591													23145	22932.7	24070.7	18408.3	15560.3	15594.7	3371.5	3647.5			1588			2131
Serine/threonine-protein phosphatase 2A 55 kDa regulatory subunit B alpha isoform OS=Homo sapiens OX=9606 GN=PPP2R2A PE=1 SV=1	5.79	52205.4	2911.79	P63151	15	50.34	0	2ABA_HUMAN	12017.2	8869.31	11767	13179.8	13149.2	13023.8	13405.6	14394.2	8527.89	16692.2	9806.53	16798	10806.7	7886.43	11937.3			1689.45			3143	12422.3	11571.7	10884.6	10531.7	10375.3	11643.9	10650.5	11531	10123.5	14959	13506.8	10941.1	10675.6	11693.7	17239.9	8545.67	3612	8429
Ganglioside GM2 activator OS=Homo sapiens OX=9606 GN=GM2A PE=1 SV=4	5	21294.6	2911.42	P17900	5	17.62	0	SAP3_HUMAN	16584.7	20128.5	16963	11891	7958.5	10548.5	11010.5	11846	14784.5	15213	18732	16619	21624	20138	25226.5	25922.5	20029.3	26779.5	22880	27143	30642	6743	6863.5	7690	5330	5790	5592	10068	8419	10464.5		10502.5	13550	17010.5	15242.5	16651.5	20441	12557	19154.5	17929.5	20889.5
Lactotransferrin OS=Homo sapiens OX=9606 GN=LTF PE=1 SV=6	8.02	80063.9	2899.41	P02788	11	19.15	0	TRFL_HUMAN	75471.5	76404.5	80759.5	84000	106081	68776.5	48979	58512	37064.5	52917	60911.5	115315	10010.5	10157	10120	79759.5	77713.5	86706.5	82508.5	89044.5	102983	6701	6761.5	7862	6983.5	5616	6230	7336	6892.5	9627	7571	7795	9574	11218	9739		14189.5	7943	11062.5	6632	6525.67
Ubiquitin-conjugating enzyme E2 S OS=Homo sapiens OX=9606 GN=UBE2S PE=1 SV=2	8.71	23959.4	2897.33	Q16763	5	31.53	0	UBE2S_HUMAN				5191.5	4619	2953	4121	5279	5382	4012	3609.5	4853.5	3020	3282.5	4404			3910			4121	9141.33	9031.5	8250	8757	7222	7706.67	8014.67	6908.33	6639.67	6520	7440	8571.33	5529.5	4973.33	4150.33	6462	5923	5147
Beta-hexosaminidase subunit beta OS=Homo sapiens OX=9606 GN=HEXB PE=1 SV=3	6.33	63567.6	2894.14	P07686	22	37.77	0	HEXB_HUMAN	49040.7	56989.7	55223	40246.7	45754	53478	38850.7	49370.7	51016	56871.3	63323	58955	66923	76032.7	75399.3	46201.7	47756.7	62349.3	40656.7	50747	55898	39998.7	43008.7	39388.3	40898	38543	35767	49510	51299.7	46232.7	53593	57058.7	55129.3	57867.3	63245.3	49400.3	53951	62000	59585.7	32290.7	29501.7
Thymidylate kinase OS=Homo sapiens OX=9606 GN=DTYMK PE=1 SV=4	8.46	23990.4	2893.86	P23919	12	59.91	0	KTHY_HUMAN	4529			8030.67	7693.33	8387	6400	6118.33	7185	4585.5	5359.33	5223	4429	3681	4525.5							14672.7	13895.7	14956.7	12756	10786.3	12250	8894	10154.3	10839	6133	8250.67	8713.33	6781.33	7368	4352.67	3363	6085	4960.5
Nuclear pore complex protein Nup50 OS=Homo sapiens OX=9606 GN=NUP50 PE=1 SV=2	6.72	50543.4	2891.09	Q9UKX7	16	46.79	0	NUP50_HUMAN	6375.33	6328	6778.33	10123.3	9596.33	11333.3	9764.67	9971	10400.3	11424.7	12332.7	11371.3	7352.33	8077	7427.33	4081.5	5363.5	4523	5617	6327	5736.5	15344.7	15557.7	15335.3	14221.3	11107	11597	20662.7	17836.7	20361.7	31165	23346	27298.7	27813.7	31891.7	27720.7	23378.3	20441	24736.3	18141.3	19795
CAD protein OS=Homo sapiens OX=9606 GN=CAD PE=1 SV=3	6.03	245322	2883.54	P27708	70	39.73	0	PYR1_HUMAN	43801	30021.7	43284.5	57654	58345.7	54420.3	46836	47575	41985.7	52118.3	45327	55376.3	27153.3	29264.7	17239.7	29922	27608.3	14915	13223.3	19758.3	16202.3	38494.7	36849	35136	25557	24246.7	23594.3	43003.3	44864.7	37929.7	9187.67	25538.3	27028	29226.3	28245.3	7377.33	27400.7	20853.7	22685.3	29871	31342.7
Galectin-7 OS=Homo sapiens OX=9606 GN=LGALS7 PE=1 SV=2	7.57	15132.1	2882.47	P47929	4	33.09	0	LEG7_HUMAN																																								4906	5344
Phosphoribosyl pyrophosphate synthase-associated protein 1 OS=Homo sapiens OX=9606 GN=PRPSAP1 PE=1 SV=2	6.84	39678.9	2869.17	Q14558	12	44.94	0	KPRA_HUMAN	5837.69	5489.83	6326.28	9750.38	9279.36	9997.5	9677.72	10343.6	9983.2	10263.5	10978.4	10948.3	6680.62	7822.24	7262.66							9050.67	9044	8080.33	8995	8683	8286.67	8752.33	8921.67	6586.73	7936.33	8984	8532.02	6423.83	6416.4	8251	3663.99	4491.59	4680.18
Crk-like protein OS=Homo sapiens OX=9606 GN=CRKL PE=1 SV=1	6.31	33891.1	2868.66	P46109	15	74.59	0	CRKL_HUMAN	15631.7	14178.3	14117.3	20538	20357.7	20644	16770	20091	19278.7	18872.7	17531.3	19486.3	14488.3	15327.3	12838	10761.3	9437.33	10079.3	9521	9957	10694.3	18678.7	17941.3	19367.7	19935.7	19454.3	19952.7	22862.3	22197	21700.3	24358.3	23809.7	28916	31790.3	11048.3	9482.33	9411.33	9777.67	31716.7	4740	5818
Zinc finger CCCH domain-containing protein 15 OS=Homo sapiens OX=9606 GN=ZC3H15 PE=1 SV=1	5.03	49001.7	2865.53	Q8WU90	21	48.83	0	ZC3HF_HUMAN	12806	11933.7	13284	17141.7	17835.3	25454.7	18060	17530	25403	18789.3	27170.3	19688.7	13900.3	13683.7	19588	11885.3	11783	14489	13211.3	13433.7	17274	25926	20084.7	15194.7	18109.7	19214	21700.7	17139	17164.3	13967	21503	20131.7	19030	13153	17789.7	10696	11034.3	13573.3	12668.3	9433.5	10249
Protein SEC13 homolog OS=Homo sapiens OX=9606 GN=SEC13 PE=1 SV=3	5.1	36053.8	2853.87	P55735	8	18.01	0	SEC13_HUMAN	9424	8588	9041	11814.7	11242	16112.7	10986.7	12045	15391	8428.33	11359	8967	4329	4663.67	7080	4838	4339	5613	4814.5	4870	4937	10338	10445	13361	11816	9780.67	6959	11565	12635.7	16010.7	11498.7	11145.7	17808.3	18335.3	12327	10851.5	12758	9920.33	10811	10477.3	8771.5
Succinyl-CoA:3-ketoacid coenzyme A transferase 1_ mitochondrial OS=Homo sapiens OX=9606 GN=OXCT1 PE=1 SV=1	7.24	56614	2852.24	P55809	17	49.62	0	SCOT1_HUMAN				15808	15612.7	15509.3	14794.3	14609	14635.3	13368.7	15373	14275										18703	16328	16875.3	13753	13471.3	13982.3	14390.7	15554.3	16326.3	10455.3	15158.3	16037.7	6978.33	4180.67	5249		2612	3277.5		4961
Inositol-3-phosphate synthase 1 OS=Homo sapiens OX=9606 GN=ISYNA1 PE=1 SV=1	5.41	61581.2	2849.91	Q9NPH2	14	30.82	0	INO1_HUMAN	36639.7	34051.7	36847.3	25109.3	26173.3	23804.7	23905.7	22744.7	24971.3	35644	34350.3	37457.3	41424.3	44236.3	41727.7	53511.7	50023.3	45917.3	46695.3	46840.7	45172.3	23610	23437.3	21007.3	23626	20005.3	22167	23687.7	22892.7	17193.3	28757.7	28642.7	24285	26208.3	24435	16883.3	28788.7	30578.7	29277	24867.7	28184
Adenylosuccinate lyase OS=Homo sapiens OX=9606 GN=ADSL PE=1 SV=2	6.73	55630.7	2848.11	P30566	17	47.31	0	PUR8_HUMAN	55718.7	49959.7	47239.7	34192	32373.7	30606.7	37342.3	37314.3	34739.3	41665.3	41777	44627.3	58215.3	46565	48715	33855.7	31595.3	27988.3	16005	14774	7199	26411	27830	24407.7	22931.3	21458.7	21391.7	29993.7	29575.7	29568	23831	29890	27918	34437	36638.7	27481	35627.7	29044.3	30261	9034.5	13726.5
Isocitrate dehydrogenase [NAD] subunit beta_ mitochondrial OS=Homo sapiens OX=9606 GN=IDH3B PE=1 SV=2	8.61	42468.9	2846.38	O43837	15	43.9	0	IDH3B_HUMAN	7189.33	7095	7555	23644.3	22137.3	29303.3	21847.7	21248.7	27176.3	17334.7	22394.3	18461.7	8445	9032.33	9947		5140				2653	31408	32329.3	35459.3	32145	32419.3	27421.3	29324.3	28308.3	29173.7	23093.7	22942	24072.7	16580.3	16264	14115.7	12821.7	11571.7	12281.7	5839	5755
Palmitoyl-protein thioesterase 1 OS=Homo sapiens OX=9606 GN=PPT1 PE=1 SV=1	6.1	34649.8	2837.28	P50897	7	29.74	0	PPT1_HUMAN	11270	16731	15663	16170.7	17226.3	18824.3	17234	18465	18952.3	19212.7	14086.7	19463	13858.3	13816.3	13161	12052	8714.67	9547	5529	6363	8029.5	48772.7	44600	42443.3	47163	44246.3	45231.3	38467.7	35950.7	28338.3	34106	37688.7	36834.7	21172.7	18953	18349.3	13193	9933.33	11808
ATP synthase subunit e_ mitochondrial OS=Homo sapiens OX=9606 GN=ATP5ME PE=1 SV=2	9.84	7933.22	2832.2	P56385	2	24.64	0	ATP5I_HUMAN																																5952		2815	4943		7304.5	7567.5	8722	50980	44804.5
Regulator of chromosome condensation OS=Homo sapiens OX=9606 GN=RCC1 PE=1 SV=1	7.28	45425.3	2829.15	P18754	10	33.02	0	RCC1_HUMAN	16894.5	19195	19605.5	40465.7	43303.7	36768.7	54440.3	51532	49655	34905.3	27171.7	32423.7	45616	42611	22394	12546.5	9519	12287	8145	11746		80398	86265.3	72276.7	65588.3	58560.3	63476	78270.7	81506.7	73568	74599.3	75004.7	60150.7	52527	64793.3	11975	44903.7	41274	48685.7	47327.7	41531.7
60S ribosomal protein L18a OS=Homo sapiens OX=9606 GN=RPL18A PE=1 SV=2	11.32	21047.5	2813.4	Q02543	4	18.18	0	RL18A_HUMAN			4640	5363	6760	9231	5607.33	4516.5	5691.33	5479.5	6905	5241.33						3102	4358.5	6124.5	6512.5	1556			1805	1500	1954
Exosome complex component RRP4 OS=Homo sapiens OX=9606 GN=EXOSC2 PE=1 SV=2	7.31	33017.2	2812.27	Q13868	11	54.61	0	EXOS2_HUMAN	5113.67	8839.33	9791.33	3131.67	3074.67	7319.67	4301	4468	11573.7	7743.33	10061.3	7182.33	8133.67	9626.33	10627	9447.33	10864.7	13508			4245	31558.3	30833	28585.7	37910.3	34721	33602.3	29763	30426.7	23799	35474	48313.3	43822.7	35573.7	27194.3	27398	7272.67	12996.7	14921.5	3636
Clathrin heavy chain 2 OS=Homo sapiens OX=9606 GN=CLTCL1 PE=1 SV=2	5.49	189140	2810.18	P53675	32	24.15	0	CLH2_HUMAN	25439.2	108609	35312.8	14123.4	35967	27672.3	22911.1	42426	54698	58316.2	57529.1	39861.7	23559.3	46740.3	41353.7	90063.7	39664.3	67567	9265.33	36219	33341.7	11096.8	13020.1	20201.3	13794.6	10108.8	9427.57	14099	16341.8	21883.2	9990.5	12892.5	21572.3	18990.1	26642.8	10300.9	33395.6	21760.5	13259.3	36113.5	30098.7
Dihydropyrimidinase-related protein 1 OS=Homo sapiens OX=9606 GN=CRMP1 PE=1 SV=1	6.62	62526.1	2806.44	Q14194	11	21.5	0	DPYL1_HUMAN				1955.59	1946.5	2106.95	2075.06	1865.3	2101.92	2314.85	2947.18	2224.89	1913.32	1543.74	2274.49	1020.09	1304.03	1741.14				9402.01	7976.49	6947.68	11221.4	9272.47	9480.75	3290.96	3190.45	2588.28	6178.95	9404.48	6020.95	3179.61	3155.6	3660.54
Alcohol dehydrogenase class-3 OS=Homo sapiens OX=9606 GN=ADH5 PE=1 SV=4	7.33	40579.7	2803.73	P11766	9	25.67	0	ADHX_HUMAN	35965	35757.7	40991	26809.7	27543	28495.3	34292	36073.7	29338	38527.3	37016.7	40580.3	47770.7	47742.3	44866	24083.7	22099.7	22742	14422.3	14766	13899.7	21194.3	20930.3	17499	20130	21504	21428.3	18876.7	19016	19145.7	20811.3	25527.7	24543	27842.3	28013.3	15830	26497.3	23949.7	23774.3	13724.3	13312.3
Quinone oxidoreductase OS=Homo sapiens OX=9606 GN=CRYZ PE=1 SV=1	8.69	35377.8	2794.89	Q08257	16	54.41	0	QOR_HUMAN	63252	71363	70230.7	50665.3	51442.3	58166.3	53636.7	58636.7	64262.3	65337	63708	69314.3	71802	73476.7	86163.7	77774	83829	88017.5	89166	101927	112306	24085.7	24049.7	22509	32549.7	29141.7	45972.3	23519	23918.7	21678.7	23943.7	26452	24909.3	18888.7	21515.7	22404.3	12320.7	10651.3	12296.3	13618.5	10988.3
Cell cycle and apoptosis regulator protein 2 OS=Homo sapiens OX=9606 GN=CCAR2 PE=1 SV=2	4.97	103529	2789.79	Q8N163	30	45.18	0	CCAR2_HUMAN	4956.67	5302.33	4616	14171	13314.3	13852	13296.3	12715.7	12544.3	8026	8052	8280.67	6426.67	4776	6996	5708	6413.67	6875.33	5386.67	6536.33	8117	28843	29753	29186.7	21678	20370.3	20139.3	23527.3	23504	21845	10616.7	12214	11827.3	8829.33	10395.7	7297.33	12908	8678.33	11874.7	8121.33	9518.67
Beta-centractin OS=Homo sapiens OX=9606 GN=ACTR1B PE=1 SV=1	5.99	42407.5	2789.24	P42025	12	36.7	0	ACTY_HUMAN	13829.4	14318.2	14764.8	15593.1	14313.1	20130.7	26292.1	24838	32094.3	13956	16580.3	14343.1	15350	14021.3	16371.6	12394.7	11996	13884.5	11723.7	11631.3	12777.2	39435.4	35304.2	34604.9	20889.4	19260.7	18322.4	31239.6	31880.4	32695.4	30981.5	31223.9	31176.4	29074	29546.3	18039.6	19096.9	22739.5	22607.9	16309	19993
[truncated: 1,845 more rows]
[truncated: 71 more columns]

## Sheet: correlation
									QC	QC	QC	QC	QC	QC	QC	QC	QC	QC	QC	QC	QC	QC	QC	QC	QC	QC	QC	QC	QC	Standard	Standard	QC	QC	Standard	Standard	Standard	Standard	QC	Standard	Standard	QC	QC	Standard	Standard	QC	Standard	Standard	QC	Standard
[truncated: 85 more rows]
[truncated: 43 more columns]

## Sheet: sum of inten for peptide types
peptide type	37 1	37 2	37 3	42 1	42 2	42 3	47 1	47 2	47 3	52 1	52 2	52 3	57 1	57 2	57 3	62 1	62 2	62 3	67 1	67 2	67 3	37 1	37 2	37 3	42 1	42 2	42 3	47 1	47 2	47 3	52 1	52 2	52 3	57 1	57 2	57 3	62 1	62 2	62 3	67 1	67 2	67 3	37 1	37 2	37 3	42 1	42 2	42 3	47 1
[truncated: 7 more rows]
[truncated: 36 more columns]

[truncated: 7 more sheets: project details, config, absqng, ppm, fmolug, absqfmol, protein homology]
