# Supplementary material for: Label-Free Quantitative Thermal Proteome Profiling Reveals Target Transcription Factors with Activities Modulated by MC3R Signaling
Source: Anal Chem. 2023 Oct 7;95(41):15400–8. doi: 10.1021/acs.analchem.3c03643 (PMC10585664; doi:10.1021/acs.analchem.3c03643)
Supplement: Supplementary file 5 — ac3c03643_si_004.xlsx [file ac3c03643_si_004.xlsx]

## Sheet: TOP3 quantification
									QC	QC	QC	QC	QC	QC	QC	QC	QC	QC	QC	QC	QC	QC	QC	QC	QC	QC	QC	QC	QC	QC	QC	QC	QC	QC	QC	QC	QC	QC	QC	QC	QC	QC	QC	QC	QC	QC	QC	QC	QC
description	IEP	mw	max score	accession	reported peptides	sequence coverage	FDR level	entry	DMSO_37 1	DMSO_37 2	DMSO_37 3	DMSO_42 1	DMSO_42 2	DMSO_42 3	DMSO_47 1	DMSO_47 2	DMSO_47 3	DMSO_52 1	DMSO_52 2	DMSO_52 3	DMSO_57 1	DMSO_57 2	DMSO_57 3	DMSO_62 1	DMSO_62 2	DMSO_62 3	DMSO_67 1	DMSO_67 2	DMSO_67 3	20gamma_37 1	20gamma_37 2	20gamma_37 3	20gamma_42 1	20gamma_42 2	20gamma_42 3	20gamma_47 1	20gamma_47 2	20gamma_47 3	20gamma_52 1	20gamma_52 2	20gamma_52 3	20gamma_57 1	20gamma_57 2	20gamma_57 3	20gamma_62 1	20gamma_62 2	20gamma_62 3	20gamma_67 1	20gamma_67 2
Alpha-enolase OS=Homo sapiens OX=9606 GN=ENO1 PE=1 SV=2	7.19	47511.2	63222.2	P06733	33	75.81	0	ENOA_HUMAN	264260	240344	266364	269619	268831	272762	255878	249737	281385	264508	260721	287315	227420	249487	259921	179036	174844	197352	138076	143745	176278	288197	288663	306373	251963	256930	255622	258335	256501	261773	288116	290454	289363	279099	277300	264669	300265	300992	291853	179808	173818
Nucleoside diphosphate kinase A OS=Homo sapiens OX=9606 GN=NME1 PE=1 SV=1	5.79	17319.8	55981.8	P15531	10	64.47	0	NDKA_HUMAN	230286	226524	231935	195414	181870	195936	180023	162207	184614	202354	198510	215521	188080	195148	199830	188015	176657	193399	182160	182871	237372	233707	232149	225044	220191	201793	219376	229635	208255	217814	259847	274773	251132	272298	282670	279653	309827	297893	322345	245692	251075
Glyceraldehyde-3-phosphate dehydrogenase OS=Homo sapiens OX=9606 GN=GAPDH PE=1 SV=3	8.73	36224.4	53303.8	P04406	21	84.18	0	G3P_HUMAN	237874	268264	293291	307353	288603	304891	273574	268896	272588	306517	279027	319258	240740	230411	269261	213502	195111	234827	178716	177457	215408	300980	283615	284092	293417	287033	298632	298879	302203	285118	323978	314722	337386	258498	272252	262714	281002	281749	287119	155499	160158
Actin_ cytoplasmic 1 OS=Homo sapiens OX=9606 GN=ACTB PE=1 SV=1	5.15	42079	53074.9	P60709	24	72.53	0	ACTB_HUMAN	192896	183466	200578	311922	315887	317323	249255	273046	334905	253363	289725	324467	183418	220324	263645	144620	150144	171926	175714	156552	214849	271135	281030	261938	320229	205705	286203	295197	214273	234246	195067	258402	201031	192904	247517	233146	363339	362862	367521	321380	322691
14-3-3 protein epsilon OS=Homo sapiens OX=9606 GN=YWHAE PE=1 SV=1	4.44	29345	46914.6	P62258	19	67.06	0	1433E_HUMAN	224867	206816	231593	179256	205529	219991	195902	197388	207048	214282	225906	241446	210574	244532	243689	141623	137631	160807	134148	128869	147745	191913	187197	185898	184597	192251	180020	187805	197148	185874	242220	233159	238261	233880	226572	220813	188711	184132	173656	133051	125754
Cofilin-1 OS=Homo sapiens OX=9606 GN=CFL1 PE=1 SV=3	8.23	18730.6	46362	P23528	9	54.82	0	COF1_HUMAN	83377.2	94851.9	96152.9	131387	130185	120666	125280	134544	130196	142204	146162	138529	124665	132574	132829	66631.5	88535.1	91949.2	87419.5	109740	121460	83916.3	77210.9	78926.2	128952	122446	125470	112729	108239	103092	94985.8	97237.8	93737.6	70163	69678.9	70981.1	63280.7	62737.6	60340.5	87382	87184.6
Profilin-1 OS=Homo sapiens OX=9606 GN=PFN1 PE=1 SV=2	8.45	15225.3	45612.8	P07737	9	65	0	PROF1_HUMAN	120111	120106	125562	181892	174077	196862	175633	176463	202287	190421	184698	205186	117615	130308	135910	86559.3	82363.7	90537.3	92174.7	96245	109023	185266	188085	196899	203815	203711	197857	206373	200206	216671	202059	199979	196660	161486	160426	158846	131558	125264	123726	133446	132016
Transgelin-2 OS=Homo sapiens OX=9606 GN=TAGLN2 PE=1 SV=3	8.44	22562.6	41974.8	P37802	13	61.31	0	TAGL2_HUMAN	119237	106309	113726	144006	145033	156380	149242	130730	143002	141003	136763	141923	101147	99129.3	98767	95789.3	85319	95871	91990.7	92476	105777	160677	148382	156846	154456	154429	149563	157926	154132	151360	140833	143936	147385	118474	118480	112439	112887	120439	109378	107162	109708
Tubulin-specific chaperone A OS=Homo sapiens OX=9606 GN=TBCA PE=1 SV=3	5.05	12911.9	39724.8	O75347	9	50.93	0	TBCA_HUMAN	66397	63538.3	65363.7	43757.3	41191.3	52304.7	44005.7	40904.3	49357	54881.3	55858	63705.3	77071.7	77652	82831.3	72619.7	69498.7	69869.3	82388.7	82983.3	92648	45691.7	45638.7	46558.3	56606.3	59563.3	57903.3	62729	63470.3	62693.7	74286.7	75204	74776	71613.3	72213.3	72310.7	73620	72958.7	72956	98124.3	96623.3
Phosphoglycerate mutase 1 OS=Homo sapiens OX=9606 GN=PGAM1 PE=1 SV=2	6.82	28918	38675.9	P18669	13	62.99	0	PGAM1_HUMAN	178135	174444	189338	161188	156623	191708	161572	159087	173562	183803	176609	194959	174452	185543	205547	131352	124655	162809	100958	95540.3	118930	206943	202009	194894	190513	177489	183480	195352	190154	179832	226343	219306	207140	218597	210699	196585	133198	126368	116212	42166	41349.7
14-3-3 protein zeta/delta OS=Homo sapiens OX=9606 GN=YWHAZ PE=1 SV=1	4.53	27916.2	38424.2	P63104	15	60	0	1433Z_HUMAN	208255	203342	207899	210679	172231	196903	207224	180953	216115	218520	224933	257475	227146	235244	235178	125464	133039	153203	98140.7	108807	124771	169659	167676	171978	166493	159483	164239	173059	166862	158760	190398	195352	184681	189109	190250	195045	149926	152224	151899	104306	101422
L-lactate dehydrogenase B chain OS=Homo sapiens OX=9606 GN=LDHB PE=1 SV=2	5.66	36923.7	36913.7	P07195	20	51.5	0	LDHB_HUMAN	285608	281301	287211	331346	281631	296147	313187	302039	315855	332742	302312	343866	305432	304664	348738	220433	229865	274288	271618	261883	319794	301329	281625	280997	284827	280923	279465	283565	259130	262477	309779	312332	311646	320461	316946	306306	372571	374717	375758	277819	282976
Nucleoside diphosphate kinase B OS=Homo sapiens OX=9606 GN=NME2 PE=1 SV=1	8.75	17412.1	36874.8	P22392	10	67.76	0	NDKB_HUMAN	47065.8	44637.9	47236	75563.1	81869	87251	88441.1	88968.4	94475.4	98475.3	105333	105095	81640.7	96935.6	83545.7	60204.8	60654.2	62563.9	47925.5	50330.6	57166.1	97617.5	96084.9	96818.3	72848.4	67978.3	66416.3	28889.4	27559.2	27522.1
Tubulin beta chain OS=Homo sapiens OX=9606 GN=TUBB PE=1 SV=2	4.59	50127.2	36143.9	P07437	20	47.07	0	TBB5_HUMAN	109792	122622	125755	156583	145058	151817	153684	143947	158034	140127	129939	133601	108265	117189	120120	56574.5	53555.1	58596.4	57876.9	60670.3	63433.5	135416	130046	127393	117870	116393	115364	125408	124266	122525	135663	127570	131197	106759	104684	97344.6	53797.3	51308.8	48050.1	75117.7	71602.8
Tubulin beta-4B chain OS=Homo sapiens OX=9606 GN=TUBB4B PE=1 SV=1	4.6	50287.4	36061.9	P68371	20	53.03	0	TBB4B_HUMAN	88515.1	87090.9	94041.8	96038.7	93827.8	97282	89853.6	87555.8	66972.3	87826.5	85002.5	86012.8	80381.3	86678.2	81383.1	44573.7	29178.9	45667.9	22119.5	29273.6	32691.4				49309.8	65163.7	48635.7	67134.3	49381.1	47575.4	88184.4	85685.8	84301.9	85112.8	81202.7	77228.2	46849.3	45193.9	43491.1	33874.1	32019.6
Creatine kinase B-type OS=Homo sapiens OX=9606 GN=CKB PE=1 SV=1	5.23	42929.5	35973.5	P12277	18	62.2	0	KCRB_HUMAN	109941	98613.7	107068	267042	243054	262091	249621	243414	266659	167295	164710	171304	109845	113762	111836	72757.7	68472	67147.7	65213.7	70879.3	71889.3	293655	267982	272345	274658	272291	269581	283806	269412	270840	162065	158517	161529	116176	113830	111294	103395	99821	95699	69846.7	66323.7
Calmodulin-1 OS=Homo sapiens OX=9606 GN=CALM1 PE=1 SV=1	3.88	16837.7	35669.5	P0DP23	14	68.46	0	CALM1_HUMAN	191258	188101	192530	157703	139665	168454	152363	136200	175267	149207	155030	199414	171794	167307	214859	172129	169278	201416	210407	191480	251915	154364	148153	144901	121786	130894	119962	128941	129457	123560	156773	160952	166283	195855	193883	186525	237740	220465	222318	213690	210476
Heat shock protein HSP 90-alpha OS=Homo sapiens OX=9606 GN=HSP90AA1 PE=1 SV=5	4.75	85059.1	35597.9	P07900	48	56.28	0	HS90A_HUMAN	115932	121048	128262	236209	228941	258694	225055	217187	253829	174012	168969	188083	120274	129269	129854	99048.7	95063	103541	123556	118433	130739	230738	224049	229176	210802	211832	216876	212905	213863	209582	153259	149868	149152	128766	123422	122188	130822	132429	135830	128613	129266
Tubulin alpha-1C chain OS=Homo sapiens OX=9606 GN=TUBA1C PE=1 SV=1	4.79	50579.7	35578.8	Q9BQE3	22	61.02	0	TBA1C_HUMAN	187258	185585	194683	234942	232970	266641	164556	170099	177051	172041	147504	174203	87064.3	88011.5	94180.9	57852.8	57979	65281.7	57017.2	59574.8	62382.7	122848	117179	116857	48343.2	48457.3	47578.6	61081.9	59675.9	56451.3	124790	116537	116493	107104	100816	95869.3	62728.5	62472.5	60447.2	59016.2	58248.3
Peroxiredoxin-1 OS=Homo sapiens OX=9606 GN=PRDX1 PE=1 SV=1	8.24	22338.5	35148.6	Q06830	14	65.33	0	PRDX1_HUMAN	187183	184825	198687	183687	181927	221815	190622	185858	220737	217986	211482	225567	155585	172363	199963	139856	138962	144476	146522	145397	170547	217795	213308	214730	213654	213585	216285	212024	222483	219232	252110	244096	254014	241572	227460	206575	198751	201744	193337	204569	206884
Heat shock protein HSP 90-beta OS=Homo sapiens OX=9606 GN=HSP90AB1 PE=1 SV=4	4.77	83606.5	34991.5	P08238	38	52.76	0	HS90B_HUMAN	116327	117223	124826	269283	247287	290736	244768	241666	275400	183145	171510	198298	126358	126690	137797	99730.7	95449.3	111531	123433	115352	133228	290749	258277	262138	251303	232123	239868	262174	241859	232493	166664	163525	154451	132284	129639	117108	120949	117210	118284	130270	128012
Pyruvate kinase PKM OS=Homo sapiens OX=9606 GN=PKM PE=1 SV=4	7.76	58507.3	34865.8	P14618	28	64.41	0	KPYM_HUMAN	193713	208409	222345	253188	236597	244481	232796	230821	247959	246225	235017	265584	209254	213380	232782	32814.1	37326.8	38500.5	32426.3	37667.3	38195.7	246517	247884	251059	243194	256006	254397	234943	243528	244863	252471	260870	261300	233614	238321	241167	86593.7	85855.7	106036	79759.7	82108.3
Tubulin alpha-1A chain OS=Homo sapiens OX=9606 GN=TUBA1A PE=1 SV=1	4.76	50820	34829.1	Q71U36	22	61.2	0	TBA1A_HUMAN	8360.16	8306.72	8982.28	42846	43179.8	47197.8	82516.4	85296	88781.8	82036.8	70336.6	83067.7	125202	126564	135436	57852.8	57979	65281.7	57017.2	59574.8	62382.7	56869.9	54245.5	53930.2	151615	151973	149217	147843	144440	136635	116062	108387	108345	107104	100816	95869.3	62728.5	62472.5	60447.2	59016.2	58248.3
Tubulin beta-2B chain OS=Homo sapiens OX=9606 GN=TUBB2B PE=1 SV=1	4.59	50409.4	34540.4	Q9BVA1	18	44.27	0	TBB2B_HUMAN	40452.4	45319.8	45711.2	35677.1	35896.6	40411.9	39653.6	38809	42136.5	40937.8	38989	40633.2	46892.5	50183.2	54163.6	17126.9	16496.2	18742.2	12788.6	12260.5	13772.6	30136.4	31572.6	30187.5	27588.2	26600.3	26881.6	30239.4	28191.5	28190.8	40978	39070.1	39827.7	47580	45256.9	46216.1	31645	31542.8	29822.5	13519.2	12803.9
Tubulin beta-2A chain OS=Homo sapiens OX=9606 GN=TUBB2A PE=1 SV=1	4.59	50306.3	34149.6	Q13885	18	44.27	0	TBB2A_HUMAN	10424.1	9812.05	10339.2	10330.3	10222	10093.4	11533.9	11798.9	11168.4	10743.4	10450.7	11390.6	10887.3	11552.4	12141.1	2758.57	2571.98	2998.55	2572.84	2821.8	4012.92	8661.39	8816.83	8575.79	7400.32	7300.77	7172.53	7715.71	7947.97	7617.82	9861.28	9273.68	9281.87	9588.65	9199.34	9503.19	7239.44	7094.92	7047.55	3232.7	3072.28
Heat shock 70 kDa protein 1A OS=Homo sapiens OX=9606 GN=HSPA1A PE=1 SV=1	5.33	70337.5	33524.5	P0DMV8	32	54.45	0	HS71A_HUMAN	174322	180561	195165	352795	353371	392091	366547	317333	388998	314695	302323	342758	178859	184020	194181	108583	106371	109586	138233	129036	153025	356796	342898	346464	344234	357552	344370	328297	335464	335612	308918	311358	310390	229960	221223	216605	140946	136308	137435	109375	112173
Heat shock cognate 71 kDa protein OS=Homo sapiens OX=9606 GN=HSPA8 PE=1 SV=1	5.2	71126.3	33388.3	P11142	34	61.76	0	HSP7C_HUMAN	128808	112532	120250	244332	234622	270704	254843	222860	262089	213814	204743	238106	123000	113426	145069	79794.9	71633.9	82151.8	77712.3	78999.5	103072	290959	291381	296893	297557	263214	269159	286018	270546	272143	253075	253688	253288	203682	204281	188728	137995	130564	122632	115235	113680
Eukaryotic initiation factor 4A-I OS=Homo sapiens OX=9606 GN=EIF4A1 PE=1 SV=1	5.16	46382.2	32901.4	P60842	29	61.08	0	IF4A1_HUMAN	16837.7	15313.1	15474.5	117888	113298	125633	104048	99944.5	109473	70720.2	69890.8	68907.2	14665.9	14182.9	15681.4	10792	10331	10541	14546.6	14645.2	14573	138590	137732	138133	136521	124889	127565	123510	123266	119489	61809.2	62205.9	64834.7	35970.6	35315.6	33953.7	28211.7	25886	24688.7	32386.7	31752.7
Peroxiredoxin-6 OS=Homo sapiens OX=9606 GN=PRDX6 PE=1 SV=3	5.98	25149.1	31977.6	P30041	21	78.57	0	PRDX6_HUMAN	139066	122786	131866	118149	125808	121332	115185	115478	121446	132044	136379	149604	103548	111429	111769	70468.3	61786.7	56314.3	51975.7	54005	50288.3	136505	141947	143250	125365	131726	128820	130181	133283	142985	156495	164854	155666	129795	135500	130155	92951	95075	93116.3	75449.7	78490.7
Tubulin alpha-3C chain OS=Homo sapiens OX=9606 GN=TUBA3C PE=1 SV=1	4.8	50644	31958.8	P0DPH7	18	51.56	0	TBA3C_HUMAN	19989.1	20766.8	21928.9	16453.2	17349.9	18434.8	21329.9	21813.4	22780.4	11393	9763.61	11826.4	6851.75	7088.36	7573.07							39292.8	37479.6	37261.8	7412.84	7430.33	7295.6	6938.77	6779.05	6412.75
Nascent polypeptide-associated complex subunit alpha_ muscle-specific form OS=Homo sapiens OX=9606 GN=NACA PE=1 SV=1	10.31	206106	31232.4	E9PAV3	30	18.24	0	NACAM_HUMAN	130045	137373	148545	137645	132542	146589	137481	136371	147403	157759	147350	157107	152794	147916	160973	150097	138503	164945	188041	170695	208475	134016	141120	137952	149957	155049	153415	150023	152970	143530	169791	176036	171990	158303	149967	152846	194276	186666	175782	179206	175414
T-complex protein 1 subunit beta OS=Homo sapiens OX=9606 GN=CCT2 PE=1 SV=4	6.02	57830.5	30298.3	P78371	28	62.99	0	TCPB_HUMAN	77961.3	76873	77169	114867	113304	121372	111792	115289	126787	127230	128952	141492	88082	89665.3	92245.7	25184	25699.7	23272.7	26046	26417.7	23586	117689	121813	121417	117233	115859	121497	115603	114642	111691	129801	132500	130454	99175	97709	98548.7	35245.7	32270	30361.7	24094.7	23278.7
60 kDa heat shock protein_ mitochondrial OS=Homo sapiens OX=9606 GN=HSPD1 PE=1 SV=2	5.56	61225.9	29465.8	P10809	43	75.92	0	CH60_HUMAN	239015	245722	252617	190461	194777	193998	205801	197039	190817	232368	218152	207500	206431	254343	272865	161832	159341	186501	142940	144418	157274	176254	182409	177151	175625	176039	179616	173944	182624	188534	245339	241111	241140	242287	253790	242575	233070	237571	240975	113302	118539
L-lactate dehydrogenase A chain OS=Homo sapiens OX=9606 GN=LDHA PE=1 SV=2	8.38	36973.9	29458.7	P00338	23	67.77	0	LDHA_HUMAN	243003	217003	235972	222315	212927	202313	214804	216359	226524	242246	243843	262388	239499	247866	251048	174228	178708	199472	186886	179039	197719	263744	245773	258230	224205	227350	225746	228024	234594	226209	281478	276929	272436	278495	268564	270555	292875	283384	283782	190386	180139
Keratin_ type I cytoskeletal 9 OS=Homo sapiens OX=9606 GN=KRT9 PE=1 SV=3	4.96	62292.5	29030.6	P35527	32	70.14	0	K1C9_HUMAN	158467	154897	157367	64465	58054.7	104792	93708.7	83961	134801	92937.7	84975.7	147980	72834.7	66006	122171	301455	271203	333661	101325	99415.7	163442	142684	138559	134910	206708	190691	200905	229413	227576	216946	255303	241535	239684	352170	361230	341236	218004	209673	210619	211349	203424
Carbonic anhydrase 2 OS=Homo sapiens OX=9606 GN=CA2 PE=1 SV=2	7.06	29303.1	28510.9	P00918	15	74.62	0	CAH2_HUMAN	82998.3	78896	81975	164101	154843	187824	153167	163760	188946	160477	164116	183675	85944.7	84462.3	87045.3	27352.7	44750	45069.3	57444.3	57902.3	59017.3	195262	177027	170533	199589	185340	166857	179844	173211	163256	174440	169680	170244	99539.3	100154	102822	70598.7	69244.3	72194.3	55695	57220.7
Keratin_ type II cytoskeletal 1 OS=Homo sapiens OX=9606 GN=KRT1 PE=1 SV=6	8.29	66209.9	28337.3	P04264	32	53.88	0	K2C1_HUMAN	196224	184368	191975	93933.8	90293.9	101172	107696	99999.9	130851	115777	106357	135782	115235	113767	130672	293696	291993	367032	134702	128407	150082	141086	138979	212163	224416	216909	222650	253798	242106	234593	255090	257707	244923	406614	417088	383447	190668	185794	180686	211754	224870
Glutathione S-transferase P OS=Homo sapiens OX=9606 GN=GSTP1 PE=1 SV=2	5.29	23584	28272.3	P09211	11	56.19	0	GSTP1_HUMAN	4945	5803.5	5860	80895	79961.7	74036	71573.3	69579	62540.3	44558	46033.3	46108.7	6833	6977	7675.67	3901	4969	5154.33	5242.33	5262.67	8238.67	75383	81352.7	72370.7	74640.3	67641.3	76458	77965.3	79273	77853	37250.3	37238.3	35224.3	11622.7	10752.7	9884	6342.5	7378	6198	10451	9064
Triosephosphate isomerase OS=Homo sapiens OX=9606 GN=TPI1 PE=1 SV=3	5.56	31076.2	27877.5	P60174	13	58.04	0	TPIS_HUMAN	220522	219460	228675	195498	195144	214299	209947	194909	214494	226752	213528	231655	203026	216262	233918	169499	156336	183665	159076	145029	151750	217349	207069	205309	219724	212177	219697	216752	223717	225053	243378	243602	220125	202890	208147	199673	173545	175498	166277	125962	126770
Prothymosin alpha OS=Homo sapiens OX=9606 GN=PTMA PE=1 SV=2	3.45	12203	26989.2	P06454	4	22.52	0	PTMA_HUMAN	189493	180335	176482	149712	174771	229134	152961	190630	235698	159579	186281	250096	214792	201092	249063	167434	174501	203838	167868	165382	228423	206215	219257	204323	220706	234546	238051	218864	233734	241936	285345	286704	287060	259518	258255	253838	274367	286428	291204	264265	252166
Phosphatidylethanolamine-binding protein 1 OS=Homo sapiens OX=9606 GN=PEBP1 PE=1 SV=3	7.41	21170.9	26796.7	P30086	11	78.61	0	PEBP1_HUMAN	96922	96714.3	103347	80820.7	75860.3	83326.7	77415.7	70611.3	82210	88926	86870.3	97768	121475	116281	131385	100455	89670.3	107894	82204.7	78984.7	100269	95270.3	96054.7	94458.3	100699	93757.7	99392	105980	99171.7	98368.3	121382	120854	112797	138413	136217	133623	127813	118226	120095	75385.3	72794
Putative nucleoside diphosphate kinase OS=Homo sapiens OX=9606 GN=NME2P1 PE=5 SV=1	8.86	15700.2	26242.8	O60361	7	60.58	0	NDK8_HUMAN	109953	104281	110350	37043.6	36917.9	42773.4	24276.5	24452.8	25932.9	35824.9	35039.7	36089.4	58917.3	59519.7	59157	74559	75076.5	77440.4	83370.5	87554.4	99445.5	39996.5	38058.5	38604.5	72556.3	67705.7	66150	115670	114854	111029	143254	155589	141270	154468	161556	154217	182254	188274	189977	159966	167208
Peptidyl-prolyl cis-trans isomerase A OS=Homo sapiens OX=9606 GN=PPIA PE=1 SV=2	7.85	18240.6	26223.5	P62937	12	66.06	0	PPIA_HUMAN	157155	146657	164000	211945	206849	224460	181089	208668	233159	169130	195218	216214	130273	150733	162424	126200	110580	125973	123764	135969	149663	240948	251104	252906	251960	266028	268852	251700	266900	273572	225977	228083	240878	178659	194229	188799	178508	167993	155737	200151	207182
Tubulin beta-4A chain OS=Homo sapiens OX=9606 GN=TUBB4A PE=1 SV=2	4.59	50042.1	25704.4	P04350	18	52.93	0	TBB4A_HUMAN	2908.7	2880.34	2797.46	2782.57	3498.06	4480.29	2699.51	3023.42	3163.57	2040.42	2730.82	3233.02	2131.94	1843.15	2548.78	3463.28	3320.31	2112.63				19780.6	19909	18520.1	816.174	479.982	558.073	1561.32	1199.59	1089.94	2345.04	2291.84	2183.67
T-complex protein 1 subunit theta OS=Homo sapiens OX=9606 GN=CCT8 PE=1 SV=4	5.28	60191	25633.2	P50990	39	61.13	0	TCPQ_HUMAN	102116	97186	102747	112663	114981	113531	112163	111979	113010	126414	121893	125326	98601	97518.7	99513	58011.7	53068.3	47702	37991	36913	37958.3	112241	111273	111139	106811	104858	108702	108828	109589	110664	123935	121556	124008	102870	103223	100328	68306.7	68262.3	68700	45119.3	44166.7
Histone H4 OS=Homo sapiens OX=9606 GN=H4C1 PE=1 SV=2	11.89	11367.4	25506.3	P62805	8	54.37	0	H4_HUMAN	38929.3	34168.3	34790	47996	47533.7	55122	35990.7	35449.3	38565.7	38297	34724	41421.3	27590.7	28018.3	31848.7	17763	17073	18310.3	31745	31546.3	37797	85092	81985.3	81711	83813.7	81375.3	81047.3	83934.7	79962.3	78319	89861.7	94696	89029	79850.3	79994.7	78373	63895.7	62849.3	58330.3	114128	112390
Peptidyl-prolyl cis-trans isomerase FKBP1A OS=Homo sapiens OX=9606 GN=FKBP1A PE=1 SV=2	8.61	12007.8	25430.6	P62942	2	25	0	FKB1A_HUMAN	35857	37852.5	35127	24803	24819.5	25817	23973.5	24632	27306.5	32978	31257	34423	36690.5	40861	42611	31863.5	29795	29149	28792	31964	33305	33191.5	38987.5	36430	44698	41349	44582.5	45487.5	44637.5	41755	46660.5	46428.5	45573	53261	53029	49520	52111.5	47614.5	48514	52882.5	53311
14-3-3 protein theta OS=Homo sapiens OX=9606 GN=YWHAQ PE=1 SV=1	4.48	28049.4	25421.8	P27348	12	44.9	0	1433T_HUMAN	56100	59324.3	56865.7	109099	116466	112251	109088	111044	116487	106988	125375	126381	73300	74652	73282	34901.3	32398.7	35573.7	37968	40410.7	47781.3	120577	128284	130749	133169	113974	133587	139772	135411	128139	137600	116194	109059	84975	83207.3	83535.3	47904.3	55797.9	55026.1	47002	46846.4
Protein disulfide-isomerase OS=Homo sapiens OX=9606 GN=P4HB PE=1 SV=3	4.57	57515.6	25073.6	P07237	35	60.43	0	PDIA1_HUMAN	169137	152067	156268	131911	126729	148194	134050	129500	140626	154632	149255	177732	159197	172340	191871	145084	141026	160729	167520	163388	199364	138582	132476	134453	133266	124043	126108	136544	144795	124688	165627	164584	159183	165526	172337	168390	184341	174347	162435	177655	176095
Malate dehydrogenase_ mitochondrial OS=Homo sapiens OX=9606 GN=MDH2 PE=1 SV=3	8.86	35959.6	24421	P40926	15	49.11	0	MDHM_HUMAN	157203	159342	175528	158605	167439	169622	161565	172890	165873	190852	182233	189269	173116	197175	202571	96380	113408	108777	14638.7	22148.7	15067	133533	138726	139319	159589	144344	151658	153436	143131	136622	166554	167377	173691	168016	172592	158212	127375	126711	113942	25979.7	13454
Eukaryotic translation initiation factor 5A-1 OS=Homo sapiens OX=9606 GN=EIF5A PE=1 SV=2	4.9	17060.4	24316.7	P63241	7	53.25	0	IF5A1_HUMAN	87354.3	103392	100656	109822	120689	109145	121534	126015	95410	107174	108327	105783	85222.5	96081.3	99452.3	93515.7	93766.7	92203	97506	110614	105973	139956	141110	130173	144433	145731	146216	138854	135186	140450	105705	105265	107710	89873.7	82792	85431.7	86658.3	88118.7	83605.7	100626	101544
10 kDa heat shock protein_ mitochondrial OS=Homo sapiens OX=9606 GN=HSPE1 PE=1 SV=2	9.55	10931.7	23938.3	P61604	8	66.67	0	CH10_HUMAN	119815	120357	122493	57935	61176	59657	60046	62418.3	54989.3	84944.3	85684.3	79617.3	109093	108705	104880	101376	107897	100009	109954	117933	122480	54273	53581	52149.7	59882	60476.3	56859	72575.7	70550.7	67226.3	79846.7	82842.3	82417.7	102948	106311	104948	132193	135381	134221	159136	159804
Endoplasmin OS=Homo sapiens OX=9606 GN=HSP90B1 PE=1 SV=1	4.56	92754.2	23494.2	P14625	56	55.67	0	ENPL_HUMAN	154946	156012	164425	168035	161002	182658	159717	158523	181263	178218	169461	197179	163006	169550	186996	153736	146036	169002	184428	172711	213563	150565	142054	140157	138777	135709	132710	140990	139564	131173	156525	151713	155690	147191	139751	137902	171803	172444	164225	165632	164064
Peroxiredoxin-2 OS=Homo sapiens OX=9606 GN=PRDX2 PE=1 SV=5	5.58	22063	23259.6	P32119	11	42.42	0	PRDX2_HUMAN	147176	136487	148342	140238	137512	147223	139935	140328	148624	164100	165720	168493	140020	162733	170026	105944	97591.7	121808	102046	106467	139194	137308	137028	135898	138500	147804	150501	144418	150177	154963	177453	168873	180570	167453	172910	162669	141932	141686	140224	146351	147087
Fructose-bisphosphate aldolase A OS=Homo sapiens OX=9606 GN=ALDOA PE=1 SV=2	8.07	39876.3	23199.2	P04075	22	63.19	0	ALDOA_HUMAN	204476	202085	204157	175038	166870	185507	171772	163934	184363	199082	191951	196648	198792	205195	229759	166708	159332	188527	154400	153637	181202	202994	209394	212333	195285	190394	194569	194986	192348	190833	233540	240054	235595	252599	265037	255688	283850	289945	289805	160051	166286
GTP-binding nuclear protein Ran OS=Homo sapiens OX=9606 GN=RAN PE=1 SV=3	7.33	24594.2	22623	P62826	12	45.83	0	RAN_HUMAN	157619	161857	174871	197539	183274	210852	194331	182548	193145	198056	195660	208403	153367	158273	165577	77972.3	72045.7	73308.3	42924.7	44179	42154.7	214213	223507	221699	212372	198440	214069	214722	208328	208815	217580	225001	220570	203817	203702	194193	126230	118568	110306	73310.3	69708.3
Protein disulfide-isomerase A3 OS=Homo sapiens OX=9606 GN=PDIA3 PE=1 SV=4	5.96	57181.6	22598.5	P30101	31	62.38	0	PDIA3_HUMAN	75023.7	78914.7	76435.3	98496.3	97952.3	103882	97041	87518.3	94220	80775	76854.7	84236.3	77880.7	76642	82241	82882.7	77587.7	85390.7	89131.7	93482	103825	113060	107344	107519	114784	115194	114187	109077	109434	108765	86069.7	82145	85696	87275.3	90532.3	87833.3	93080	89340.7	90972.3	97045.7	96555.3
ADP-sugar pyrophosphatase OS=Homo sapiens OX=9606 GN=NUDT5 PE=1 SV=1	4.67	24612.8	22496.8	Q9UKK9	12	50.23	0	NUDT5_HUMAN	86793.3	97042.3	99830.3	58987.3	62165.7	63793.3	59708.7	61303	69470	80757	80764.3	90218.3	98627.3	103760	106546	116914	108783	120998	130361	129069	147175	52729.7	50074.3	50359.7	58533.7	59424.3	57025.7	61843	62837	59962.7	87603.7	88796	85600.7	86705.3	85004.7	82250.7	106206	105691	105862	132243	131427
Ran-specific GTPase-activating protein OS=Homo sapiens OX=9606 GN=RANBP1 PE=1 SV=1	5.03	23481.2	22455.4	P43487	7	41.79	0	RANG_HUMAN	70242.3	81142.3	80141.7	109005	104638	111487	101422	103556	109573	89086.7	84868	91171	91298.3	94543	95582	82473	75766.7	76582.3	92490	87414.7	107386	145707	146368	143371	157094	153617	156030	148252	152162	148357	131036	130624	126360	114804	113743	108855	117126	108066	97042	123149	114750
Elongation factor 1-beta OS=Homo sapiens OX=9606 GN=EEF1B2 PE=1 SV=3	4.3	24934.8	22397.3	P24534	9	45.33	0	EF1B_HUMAN	49710.3	70763.3	73858.3	128820	134874	134006	133791	130711	134434	96856.3	91910	101542	76047	73384.3	82580	85503.3	84166.7	92653.3	114286	113865	124046	132051	132837	118947	150496	128655	148530	156552	154037	135260	101058	95585.3	93841	73372.3	69251	66174.3	50097	52290.3	50372.7	84212.3	83863.7
Keratin_ type II cytoskeletal 2 epidermal OS=Homo sapiens OX=9606 GN=KRT2 PE=1 SV=2	8.07	65718.1	22236.3	P35908	39	63.07	0	K22E_HUMAN	57686.7	55255.3	58356.5	34340.1	34659	41001.9	29608.9	31534.8	33382.3	41227.4	39889.3	44570.7	45924	47045.4	54107.7	98929	98808	111599	55028.5	56631.1	63668.9	116615	120075	120777	73126	74059	74804	89040.3	81856.3	83569.7	80959	80252.7	85169.7	182609	194201	190684	83126.9	81212.7	79450.4	138469	142042
Single-stranded DNA-binding protein_ mitochondrial OS=Homo sapiens OX=9606 GN=SSBP1 PE=1 SV=1	10.04	17259.7	22183.8	Q04837	7	55.41	0	SSBP_HUMAN	44291.7	42274	41286.3	23083.3	25312.3	26658.7	21579.7	23473.7	24251.7	28228.7	28800	27977	49767.3	50929	52454	76428	70392.7	73666.3	93260.7	100304	108911	30409.7	29457.3	30574	19192	19011.3	18465.7	17013.7	17205	17173.7	24490.3	24539	23860.3	42464	40468	40176.3	51934	46583	45255.7	93117.7	93922
Myosin regulatory light chain 12A OS=Homo sapiens OX=9606 GN=MYL12A PE=1 SV=2	4.45	19851.2	22102	P19105	11	54.39	0	ML12A_HUMAN	17722.3	15691	16911.3	71395.7	69462	78042.3	60690	65701	71588.3	42993.3	48662	58999	14606.7	15388.7	16711.7	11930	12974.3	13197	17476.7	16756.3	17646	64895.3	65539	64820.7	63218	63285.3	65142.7	63784.7	66192.7	62629.7	38062	37450.3	38221.3	21182.7	20791.3	20608	27157.3	26819	26687.7	27028.7	27099.3
Phosphoglycerate kinase 1 OS=Homo sapiens OX=9606 GN=PGK1 PE=1 SV=3	8.16	45014	21985.1	P00558	24	65.23	0	PGK1_HUMAN	51334	51521.7	48449.3	138288	135998	152506	141040	138695	155342	149973	150755	157285	47746.4	45542.1	35217.1	40119.4	39525.5	31922.4	37771.8	39924.3	32450.8	161426	156549	165538	142232	146387	159559	147113	152581	162726	163929	159378	159808	52057.2	55457.3	52556.9	30610.1	28557.7	28956.3	23280.6	25369.8
Histone H2A type 1-H OS=Homo sapiens OX=9606 GN=HIST1H2AH PE=1 SV=3	11.51	13906.3	21934.8	Q96KK5	3	27.34	0	H2A1H_HUMAN	68682.8	55353.5	51724.5	41964.6	44248.3	45447.3	23048.6	24117	22949.1	28281.1	27115.5	25441	3661.35	3720.24	3994.6	22470.5	16904.3	16241.9	25032.9	28747.4	23924.7	40455.2	53410.5	52967.6	63879.8	57077.6	62389.1	50763.3	48009.3	47119.4	33842	33063.5	34951.4
Inorganic pyrophosphatase OS=Homo sapiens OX=9606 GN=PPA1 PE=1 SV=2	5.46	33116.3	21887.5	Q15181	19	59.17	0	IPYR_HUMAN	73252.3	79562.7	84338	118199	116243	128082	116411	113780	121135	124896	122630	133429	84112.3	83627.7	89299.3	48115	47020.7	47092.3	44408.7	44053	45523	123272	122667	128134	133943	129705	122915	132561	126615	126327	135847	136335	138732	120427	126718	115585	78254	82069	75959.3	48043.3	50317.7
Protein S100-A11 OS=Homo sapiens OX=9606 GN=S100A11 PE=1 SV=2	7.03	11854.5	21778.5	P31949	6	52.38	0	S10AB_HUMAN	80540.3	81611.7	84886.7	68921.7	63924	67017	67031.7	70035.3	72579.3	78929.7	80632.7	87436.7	90908	88907	96387.3	71699.7	67950.3	93098	61905.7	62904	72249.7	51436.3	50713.7	50235.3	52860.7	66431	51712	55319.3	56687.3	55204.7	69702	70838.3	71817.3	80691	83303	80752	75378	72335.7	72875.3	63585.3	61377.7
Alpha-actinin-4 OS=Homo sapiens OX=9606 GN=ACTN4 PE=1 SV=2	5.13	105310	21743.5	O43707	56	65.42	0	ACTN4_HUMAN	115100	123702	124996	84483.1	87105.7	90404.7	86713.5	88899.7	95566	115067	117137	123233	116515	119497	127208	76413	72843.7	66956	23257.3	22533.3	22124.3	86644.3	96866.3	93174	94231	78597.7	88462.3	94728.7	87321.3	86648.5	121109	124660	110144	126390	123381	107438	61197.7	58692	59824.7	27852.7	26751.7
Small nuclear ribonucleoprotein F OS=Homo sapiens OX=9606 GN=SNRPF PE=1 SV=1	4.43	9782.26	21716.8	P62306	3	22.09	0	RUXF_HUMAN	23892.7	21550	19612.7	17019.3	16058	24516	17717.7	15932	22505.7	23090.7	21934	34214.7	23875	20850	31478	31589.3	26723	33470.3	28997.3	27636.7	38442.3	38320.7	39159	38323	37616.7	30893	35378	42706.3	42380	38839.7	55000.3	50988.7	48748	58651.3	55218.3	54535	60130	56001	48825.7	61880.7	57909
Purine nucleoside phosphorylase OS=Homo sapiens OX=9606 GN=PNP PE=1 SV=2	6.53	32346.1	21678	P00491	17	67.13	0	PNPH_HUMAN	84240.7	76014	79391.3	43257.3	47664.7	48316	46280.3	46542	47429.7	64470	71587	63434.7	80464.3	79566.3	73434	102905	95006.7	102256	104164	99568.3	108654	55820	57831.3	55924.7	53020	50584.7	53454.7	59526.7	58295.7	56596.7	84125	81302.3	80367.3	92637.7	92313	88023.3	113871	100070	89957	102960	92775.3
Elongation factor 1-alpha 1 OS=Homo sapiens OX=9606 GN=EEF1A1 PE=1 SV=1	9.49	50483.1	21485.1	P68104	23	55.19	0	EF1A1_HUMAN	143572	141860	142131	247011	278147	256874	285111	269600	233817	241196	235352	210389	119359	124810	138298	103256	94200.7	100940	110178	115257	127085	297964	272240	270202	279303	284354	261232	257580	269669	241353	282490	215193	219923	201755	158271	197575	141695	138004	138651	151939	141243
Heterogeneous nuclear ribonucleoprotein K OS=Homo sapiens OX=9606 GN=HNRNPK PE=1 SV=1	5.22	51261.5	21398.2	P61978	23	55.29	0	HNRPK_HUMAN	75835	86392.3	84324	135156	138519	137671	141851	131344	131689	111029	103219	97729	100386	98303.7	89775.3	82176.7	75206.3	84356.7	94592.7	91047	91624.7	111700	109801	107390	109231	111404	112660	105563	106708	101999	66195.7	64371.7	69422.7	49891.7	51114	50516.7	48430.7	48866.7	45719.7	55079.3	53089
Rab GDP dissociation inhibitor beta OS=Homo sapiens OX=9606 GN=GDI2 PE=1 SV=2	6.08	51119.6	21281	P50395	28	62.92	0	GDIB_HUMAN	86765.5	86917	89531.6	92324	87382.7	85204.3	98701.3	96881.7	100428	125513	114666	120658	92157	88376.7	87270	10946	11507.3	11032.3	14532.2	13814.7	10338.9	118774	108686	105724	100375	92239.2	97055.7	102007	102023	98380	121596	115254	116208	101693	95752.3	83723.7	14359.1	12609.9	10862.2	13092	11805.8
Parathymosin OS=Homo sapiens OX=9606 GN=PTMS PE=1 SV=2	3.93	11529.9	21078.7	P20962	4	25.49	0	PTMS_HUMAN	83581.7	78779.3	81860.3	62689	58576.3	47665.5	67731.3	60438.3	52907	72641	74505.3	63543.5	94039.3	89444.3	152301	85525	78138.3	136894	95821.7	98375	165538	43183	40310.5	38939	79226	80134	82937	90513	88794	87443	112632	100987	108282	117960	113196	114825	137389	137145	136967	139432	137637
Ubiquitin-60S ribosomal protein L40 OS=Homo sapiens OX=9606 GN=UBA52 PE=1 SV=2	10.5	15013.5	21063.6	P62987	8	53.13	0	RL40_HUMAN	130216	154816	162841	130691	114838	135612	119171	98799.3	118320	146921	147651	142046	134030	145608	127038	125352	132792	148887	156751	157381	184298	125047	139166	138956	148084	125420	155023	134913	141209	131682	127167	137583	132732	127402	123266	126734	161094	115561	165313	179477	172100
Nucleophosmin OS=Homo sapiens OX=9606 GN=NPM1 PE=1 SV=2	4.45	32746.2	20818	P06748	14	44.9	0	NPM_HUMAN	118008	130360	133340	137535	144759	168992	121776	130984	133880	135108	137099	145398	121231	129574	145914	115664	116588	120826	134651	146794	163720	102846	103190	103063	126296	116236	125614	122590	112990	118395	144579	146345	143716	135397	136446	132442	157342	158752	159186	183402	175807
Heterogeneous nuclear ribonucleoprotein A1 OS=Homo sapiens OX=9606 GN=HNRNPA1 PE=1 SV=5	9.45	38860.8	20662.9	P09651	20	54.3	0	ROA1_HUMAN	46399	49386.7	48907.7	108599	116796	128340	97098.5	99913.2	119011	71305.3	81603.3	82978	70034	67729	81228.7	41276.3	48838.7	44621	56919	61533.7	59730.3	131230	127017	123183	143901	133093	127735	128021	129196	108566	98031	94476.3	98947.7	59141.3	58158.3	59635	35132	33829.3	34954.7	45714.3	36534.3
Keratin_ type I cytoskeletal 10 OS=Homo sapiens OX=9606 GN=KRT10 PE=1 SV=6	4.96	59055.3	20596.7	P13645	27	46.4	0	K1C10_HUMAN	162608	161903	171284	100278	106097	115253	90258.7	93360.3	106598	111410	111658	119249	122820	127315	125596	163451	175557	193179	136191	137010	151327	176645	170315	170809	171943	168833	163635	179354	171198	165549	172653	173997	176098	311901	314326	301700	185393	183961	181164	212866	216968
Endoplasmic reticulum chaperone BiP OS=Homo sapiens OX=9606 GN=HSPA5 PE=1 SV=2	4.88	72447.1	20551.3	P11021	35	58.87	0	BIP_HUMAN	124039	115795	122823	106821	106905	124509	108262	106196	121326	121088	116834	136096	118743	125132	129340	117961	111556	125133	131412	126738	148573	121169	117896	115454	123949	124613	125578	128739	125848	122713	140116	139437	139946	137392	132764	138981	141617	145869	146050	142375	134983
Rho GDP-dissociation inhibitor 1 OS=Homo sapiens OX=9606 GN=ARHGDIA PE=1 SV=3	4.82	23264.2	20361.7	P52565	11	38.73	0	GDIR1_HUMAN	64698.7	64587.7	65300.3	128787	119507	128600	119174	110713	130885	121022	113402	135230	65806	64373.3	68165.7	36299	35731.7	35914	36580.3	36685.3	41089	118904	115957	111530	128182	118993	122328	132410	128876	125582	137420	134720	132635	95958	94536.7	91771.3	37764.7	35097.3	34475.3	25405	24194.3
Peptidyl-prolyl cis-trans isomerase FKBP4 OS=Homo sapiens OX=9606 GN=FKBP4 PE=1 SV=3	5.19	52089.8	20100.8	Q02790	30	63.4	0	FKBP4_HUMAN	26140.7	25533	25755.7	97440.7	89882	119690	96428.3	89629.7	122353	52731.3	49392.3	62085	26328.3	26128.3	29566.7	19052	17778	19711.3	21570.3	21829	26449.3	162734	163724	157400	154563	154993	159173	152683	148039	147876	70024.7	79202	67935	58592	64645.3	61724.7	53737.7	52835.3	53870	42748	39488.7
Ubiquitin carboxyl-terminal hydrolase isozyme L1 OS=Homo sapiens OX=9606 GN=UCHL1 PE=1 SV=2	5.19	25166.6	20043.3	P09936	9	39.01	0	UCHL1_HUMAN	96951.7	98190	102236	129444	125293	130816	120963	109883	110778	136629	131032	143166	88034	82455	82477.3	96268.3	92284	91343	101619	97151	102078	140046	141750	135761	147094	114533	136585	147528	141965	140051	162674	150248	145640	118963	113736	104009	116578	114635	98864.3	123024	113282
14-3-3 protein beta/alpha OS=Homo sapiens OX=9606 GN=YWHAB PE=1 SV=3	4.57	28196.5	20006.2	P31946	12	52.44	0	1433B_HUMAN	81511.9	86294.3	82478	101215	92264	100173	98156.3	96143.3	118537	109163	117083	139151	93554.7	96485	122266	38640.7	39363	49088.8	43218	42270.7	56095.7	106454	108724	103962	102359	98752.3	104812	107257	105172	103986	131914	134603	134892	104036	101558	104317	68476.9	71839.8	70529.4	62430.9	60094.7
40S ribosomal protein S3 OS=Homo sapiens OX=9606 GN=RPS3 PE=1 SV=2	10.24	26859.4	19933	P23396	16	57.61	0	RS3_HUMAN	24942.7	24049.3	24627.3	59353.3	58814.7	60676.3	48177.3	45811	52286	34019.7	32179	38067.7	20061	18927.3	24961	11031.3	11183.7	12947	22420	22519.7	22762	60884.3	62037.7	61597.3	55601	61131	57163.7	45814	48428	46487.3	52214.3	48781.7	50665.7	37058	36109	36157	10229	10268	10192.3	29699.7	27798.3
Serine-threonine kinase receptor-associated protein OS=Homo sapiens OX=9606 GN=STRAP PE=1 SV=1	4.81	38780.5	19711.3	Q9Y3F4	16	53.43	0	STRAP_HUMAN	37351.7	41761.3	42701	58270.3	58045.3	68117.7	49463.7	52470.7	56137.3	57383.3	53247.3	59704.7	54351.3	51022.7	61400.3	23812.7	23365	25417.3	17317.7	16040	18106.3	74081.7	71674.3	66398	69959.3	59380.3	66182.3	63698.3	64090.3	56363	61737.7	56149	50405	57022	51285.7	49992.7	31419	34533.7	27814.3	19276	17399
Transitional endoplasmic reticulum ATPase OS=Homo sapiens OX=9606 GN=VCP PE=1 SV=4	4.96	90006.3	19505.3	P55072	43	57.44	0	TERA_HUMAN	164033	161432	169349	121088	116923	142069	130920	121647	140636	151623	138355	162094	171404	166443	185520	162458	149332	182448	180993	165599	194439	126392	121308	119867	131783	129378	128552	129672	127225	126778	164774	168748	174274	165925	168977	161190	214865	211158	199120	169419	160427
Carbonyl reductase [NADPH] 1 OS=Homo sapiens OX=9606 GN=CBR1 PE=1 SV=3	8.42	30660.1	19427.1	P16152	13	57.04	0	CBR1_HUMAN	6619.46	9840.05	10185.9	33445.4	34835.7	40816.9	33024.8	35421.7	38476.1	42954.6	38285.2	41368.8	10936.9	10251.9	10564.6	2579.72	2776.69	3480.41	3215.14	4103	4580.67	46702.3	45831.2	42010.4	40697.2	34548.9	39487.7	43999	41541.1	35986.3	46362	43008.5	36993.2	21086.8	19622.6	19937.7	4585.16	4703.37	4347.18	4983.49	4604.42
Calreticulin OS=Homo sapiens OX=9606 GN=CALR PE=1 SV=1	4.09	48312.7	19170.8	P27797	33	56.83	0	CALR_HUMAN	214243	222073	208622	179804	222570	222874	203764	201253	252175	170300	204724	245206	249511	211244	207929	150939	173267	191797	247992	186574	235243	212373	259032	251613	276175	225865	259443	262266	252669	233305	251283	242152	217849	191755	225882	211619	228299	214552	196491	217582	204547
14-3-3 protein gamma OS=Homo sapiens OX=9606 GN=YWHAG PE=1 SV=2	4.61	28473.7	19131.1	P61981	13	59.51	0	1433G_HUMAN	89382.8	75341.1	81858.1	70121	110768	68815	76400.8	110488	117455	76814	85608.7	123221	92716.7	96284.3	149764	62827.3	57156.7	68331.2	53336.4	51161	62208.4	57672.8	57743	58035.4	61698.1	113107	62509.1	67106.3	65049.3	63613.6	127154	126294	130557	128560	130798	131736	76462.4	141377	81699.5	44582.4	47796.7
Annexin A5 OS=Homo sapiens OX=9606 GN=ANXA5 PE=1 SV=2	4.73	35993.9	19087.7	P08758	18	67.19	0	ANXA5_HUMAN	23693.7	20893.7	21307	88277.3	88453	89632.3	82460.3	88802.7	93336.7	50575.3	48702	48969	16669	17726.3	18981	15794.7	14619.7	14071.3	18780.7	18696.3	18833.7	68838.3	74311.3	72254	65506.7	67472.3	67696	68058.7	67779.3	71742	31203.3	30351.3	30507.7	18532	17432.7	18481	18411.7	18023	17265.7	20247.3	20410.3
ADP-ribosylation factor 1 OS=Homo sapiens OX=9606 GN=ARF1 PE=1 SV=2	6.41	20753.8	18871.7	P84077	14	72.93	0	ARF1_HUMAN	57843.7	55526.8	63521.3	60245	60881.7	58561.5	71564.6	71600.8	63784.6	78824.4	74360.7	79655.7	59447.9	57060.6	50605.4	37269.8	31184.1	28979.2	24005.2	22753	21051	97796	90302.7	84311	83070.7	69282	77539.7	79591	77092.1	71930	88259.3	84504.6	84283.9	86803.2	77639.6	73283.5	62385.7	51900.8	41236.3	38648.2	36912.8
60S acidic ribosomal protein P2 OS=Homo sapiens OX=9606 GN=RPLP2 PE=1 SV=1	4.18	11665	18770	P05387	7	89.57	0	RLA2_HUMAN	58299.3	51395	55956.3	36167.7	38942	40670.3	41507.3	40139.7	41019	45746	43656.3	49693.7	66573.3	66436.3	60787.3	79525.7	74998	86161	112337	113974	121014	46991	47384.3	53469.3	53419.3	56377.3	56119.7	64935.3	69286.7	69417	90292.3	91517.7	88156.3	82991	83038.3	82802.3	121323	123698	124629	175051	169330
Protein/nucleic acid deglycase DJ-1 OS=Homo sapiens OX=9606 GN=PARK7 PE=1 SV=2	6.4	20062.2	18720.3	Q99497	12	61.9	0	PARK7_HUMAN	116029	114820	113048	95011.7	95345.7	105381	83715	85714.3	99955.3	119446	117813	137078	112484	118839	138667	106191	102175	116405	90044.7	97669.7	104597	93660	96852	90606.7	96091	83670.7	95637	104603	102383	104748	130639	134032	123739	136301	130174	117174	101157	109362	98215.3	88157.7	87586.3
Heat shock 70 kDa protein 1-like OS=Homo sapiens OX=9606 GN=HSPA1L PE=1 SV=2	5.66	70774.3	18707.2	P34931	17	29.49	0	HS71L_HUMAN				2571.7	3111.49	3375.31	3893.04	3062.05	3997.47	1906.51	2256.39	2296.93										3164.03	2815.48	2788.45	2855.53	3008.94	3092.71
T-complex protein 1 subunit alpha OS=Homo sapiens OX=9606 GN=TCP1 PE=1 SV=1	5.73	60856.9	18686.8	P17987	21	45.32	0	TCPA_HUMAN	69521.3	68906	71060	87246.7	81380.7	92323.3	84624.3	81030.7	98061	94698.3	101252	112082	59735.7	62573.7	69289.7	23088	23110.7	22153.7	19808.3	18987.3	22087.3	89466.7	89413.7	93463	85311.7	90436.3	90850.7	86922.7	90242.7	90894	109114	109359	109058	80536	86949	86355.7	33923.7	33004	34267.7	25351.7	23832
Glucose-6-phosphate isomerase OS=Homo sapiens OX=9606 GN=GPI PE=1 SV=4	8.49	63375.4	18356.3	P06744	34	65.95	0	G6PI_HUMAN	147123	140836	149931	199431	193123	214186	224282	205115	223034	229774	210191	238900	157672	155144	168169	30826.3	27283.7	29005	27494	26366.3	29898.3	206759	201598	196689	201626	188708	190296	200040	197402	178640	225054	216760	214667	163757	169942	162492	35964.7	34236	31737	42609.3	39256.3
Superoxide dismutase [Cu-Zn] OS=Homo sapiens OX=9606 GN=SOD1 PE=1 SV=2	5.7	16163.9	18346.4	P00441	7	49.35	0	SODC_HUMAN	177490	175448	196610	134784	142355	156019	137402	148090	144061	170367	179392	169829	167251	184059	178029	157455	160688	158344	169179	178481	197283	110477	114007	115788	132927	138440	138743	134666	136884	140037	169961	174175	166147	175066	174402	177880	194256	196418	197199	208692	212947
Peroxiredoxin-4 OS=Homo sapiens OX=9606 GN=PRDX4 PE=1 SV=1	5.87	30768	18222.6	Q13162	12	52.03	0	PRDX4_HUMAN	120276	117850	130878	97993.3	96305.7	98057.3	93875.3	93925.7	97628.3	111063	108160	113832	114563	115239	126291	137318	129443	149027	151855	137895	168257	100257	95507	92813.7	93251	91012	86597.3	95422.3	94201.3	85876.3	135017	107543	111707	148906	137391	132970	177360	161855	161646	154535	160692
Actin_ alpha cardiac muscle 1 OS=Homo sapiens OX=9606 GN=ACTC1 PE=1 SV=1	5.08	42361.2	18215.3	P68032	19	54.91	0	ACTC_HUMAN	170435	173317	189175	246737	216621	286647	219275	199955	267945	198274	178333	222235	153874	154866	193803	128182	112773	145329	135491	123884	167338	333647	324030	296722	323106	299610	311230	323533	311130	291436	295349	291186	251328	234567	236032	187011	39221.3	35992.6	34011.6	18709.8	19652.7
T-complex protein 1 subunit epsilon OS=Homo sapiens OX=9606 GN=CCT5 PE=1 SV=1	5.31	60127.4	17894.2	P48643	29	50.09	0	TCPE_HUMAN	82168	81018	81507.3	100906	96533.3	102488	99197.3	92413.3	108160	103999	106692	118962	84864	84787.7	99032	42057	33316.7	46051.3	25464.7	25945.3	30588.7	93177.7	91116.7	93787.3	90841	94834.3	95244.7	95919.7	102347	94163.3	110576	110935	112554	94950	90405.3	95499.3	58732	57431	57360.7	28783.7	27625
Elongation factor 2 OS=Homo sapiens OX=9606 GN=EEF2 PE=1 SV=4	6.43	96307.8	17894.1	P13639	37	37.3	0	EF2_HUMAN	171912	160857	170136	170209	157780	160514	172969	158908	175436	186198	182221	205582	157317	159602	184441	65883.3	57523.3	61744.7	30276.7	32172	36146.7	200776	211693	222793	198212	205386	219264	207080	206772	214369	232015	244301	240893	227585	225179	224224	123687	118574	122454	96184	93044
Proliferating cell nuclear antigen OS=Homo sapiens OX=9606 GN=PCNA PE=1 SV=1	4.38	29111	17887.4	P12004	13	57.47	0	PCNA_HUMAN	97285.3	89520.7	99922	88198	93478	100113	95468	90137	101182	105937	102541	116111	92628.3	89666.7	108072	54393	51036	54479.7	39975	37327	48467.7	119582	118858	123378	118837	122596	115356	123652	126964	124001	145840	138269	142702	131455	127918	124680	86670.7	87212.3	81503.7	58856.7	58561
Stathmin OS=Homo sapiens OX=9606 GN=STMN1 PE=1 SV=3	5.67	17302.5	17796	P16949	13	59.73	0	STMN1_HUMAN	45889.7	52442.7	50394	51738.3	56776.7	52599.7	49014	51473.3	49725.3	66994	62337.3	56779.3	88703.3	87982.7	74857.6	68131.3	64411	56583.7	80545.3	90666	78603.7	40434	41973.7	39680	49940.6	50740.3	51578.2	50983.1	55798.5	51437.9	54113.6	55035.9	58632.1	58818.1	58909.8	59133.4	47484	47443.7	49630.2	60913	63971.7
40S ribosomal protein S21 OS=Homo sapiens OX=9606 GN=RPS21 PE=1 SV=1	8.84	9225.45	17700	P63220	3	37.35	0	RS21_HUMAN	38566	35530	38127	21743.5	21246.5	16425	41812	35931	10243	30263	28770	31496	29181	26743	25398	30325	23801	21404	47361	37160	16746	23959.7	22217	20955	31297.7	18131	26070.7	28709	27016	24789.3	44978.5	46805.5	37886	43462.5	42100	39053.5	49701.5	45381.5	42155.5	65085	66419.5
Vimentin OS=Homo sapiens OX=9606 GN=VIM PE=1 SV=4	4.86	53708.8	17654.6	P08670	31	65.24	0	VIME_HUMAN	128091	124549	135056	44542	46312	46078	64794.7	64914.3	69133.3	126683	127769	148372	126714	126148	135060	114397	110278	119781	130975	130048	144081	36112	34784.3	33517.3	38958	37523.7	38483	44555.3	42224	41925.8	145528	144198	144797	126644	122440	121769	130512	132439	123840	137859	133750
Cofilin-2 OS=Homo sapiens OX=9606 GN=CFL2 PE=1 SV=1	8.16	18850.7	17642.2	Q9Y281	10	62.65	0	COF2_HUMAN	31925.2	31442.1	31668.8	41925.8	39337.1	41381.3	38233.9	39057.5	38056.8	47456.2	44514.7	42430.7	39750.8	37958.6	33616	20631.8	19606.9	19008.4	17862.9	17984.9	18256.8	36062.7	36227.1	35394.1	32759.1	27380.5	29953.1	34196.6	33200.5	32258	46302.9	45614.2	43990.7	46227.3	45105.5	44142.5	28368.3	26270.1	23627.8	20394.4	18969.1
Proteasome subunit beta type-5 OS=Homo sapiens OX=9606 GN=PSMB5 PE=1 SV=3	6.54	28651.4	17516	P28074	12	43.35	0	PSB5_HUMAN	68723	72417.7	72005.7	36777.3	37034	43873	35530.7	38299	41923.7	58293.7	57478.7	61891.7	52885	57182	64928.7	86170	82800	86979	89302.3	92971.3	106360	55268	56324.3	52413.3	50767	48410.3	47408.3	50702.7	49079.3	46805	77148	73913	74667.7	94711.7	92290.3	86466.3	130621	122221	119808	119658	117638
Lupus La protein OS=Homo sapiens OX=9606 GN=SSB PE=1 SV=2	6.78	47008.2	17336.5	P05455	33	62.25	0	LA_HUMAN	75835.3	83871	85529.7	115803	119057	124998	116368	125240	123585	130206	124579	132733	105922	106963	106644	22771.7	25784.7	29458.3	24333.7	24456.7	26602	91107	92667	88824.7	96885.7	89925.7	94884	101091	99709.3	92869.7	95428.3	90662	87888.7	61583.7	62373	62875	22304	23242.3	22777	14494	14001
Stress-70 protein_ mitochondrial OS=Homo sapiens OX=9606 GN=HSPA9 PE=1 SV=2	5.8	73965.8	17308.2	P38646	39	56.41	0	GRP75_HUMAN	44022.7	42504	44029.3	113944	110276	114012	98664.3	97885.3	106918	98953.7	90046	99416.7	44628	40464	39379	40128.3	38214.3	39941.7	36597.7	33366	39123.7	126393	125944	127313	121700	131583	129998	121344	121195	126455	107218	118770	110341	63227.7	65303.7	62168.3	87494.3	84539.7	84037.7	46620.7	46307
Mitochondrial import inner membrane translocase subunit Tim13 OS=Homo sapiens OX=9606 GN=TIMM13 PE=1 SV=1	8.27	10728.2	17288.1	Q9Y5L4	4	53.68	0	TIM13_HUMAN	24468.3	27317.7	26396	17013.3	18311.7	16908.7	17733.3	16613.7	15863.3	27067.3	24831.3	23350	23251	22054	20975.3	19987.7	20228.3	19294.7	24808.7	23068	22035	16658.3	17111.7	16371.7	22652.7	18730.3	20901.3	24099	22481.3	21865.7	34133.3	33251.3	29714	34276.3	31928.3	29260.7	21318.3	18789.7	14559.3	19608.7	17935
Peptidyl-prolyl cis-trans isomerase B OS=Homo sapiens OX=9606 GN=PPIB PE=1 SV=2	10.06	23799.6	17167.6	P23284	13	50.93	0	PPIB_HUMAN	57753.7	56046.7	55083.3	55321.3	63028.7	61953.3	56247.3	60880.7	63764.7	64363.7	57195.7	64133.3	58178.3	57389.3	58183.3	75406.3	65475	69107.7	86011.7	83723	87170.7	83396.7	81519.7	83373	76216	83773.7	79986.7	76238.3	77580.3	76935	71420.3	70817	73151.7	58115.3	58760.7	58849	71030.7	69876.3	65836.7	76965	76040.7
Cytochrome c OS=Homo sapiens OX=9606 GN=CYCS PE=1 SV=2	10.15	11862.8	17111.4	P99999	10	68.57	0	CYC_HUMAN	41770	40471	41085.3	35002.7	33791.7	39448	28067	29691	35731	37341	35636.7	46502.3	50038	46755.3	54251	57083	55544	68210.3	49147.3	50491	62296.3	21614.7	22312.3	22496	22967.3	24439	22934.7	24483	24615.3	24947.3	26968.7	26145	26465.7	27901.7	28173.7	27731.3	47028.3	46986.3	44939.3	44967.7	45348.3
Protein SET OS=Homo sapiens OX=9606 GN=SET PE=1 SV=3	4.02	33488.9	16957.5	Q01105	9	35.17	0	SET_HUMAN	214318	223082	234082	169979	164376	189095	185566	170258	206998	202760	202236	228022	211044	224036	237480	169349	177292	208851	173620	183367	212240	172265	177307	178772	177766	176639	180575	187028	189358	178427	225431	244354	221247	237189	237085	228043	238446	236792	239904	194299	177998
POTE ankyrin domain family member E OS=Homo sapiens OX=9606 GN=POTEE PE=2 SV=3	5.8	122961	16950	Q6S8J3	24	25.95	0	POTEE_HUMAN				2458.85	2239.25	2513.68	3188.44	2505.71	3000.96	2250.99	2236.86	2875.83	3769.95	2864.45	3873.88	2827.29	1851.5	3583.52	2302.43	2269.63	3947.08	4195.96	4418.09	4378.46	2325.72	2553.67	2145.02	2356.64	2243.33	2396.09	3912.82	3069.02	3039.65	2750.35	3457.97	3597.51	3130.22	4994.43	3166.74	1210.93	3200.78
Complement component 1 Q subcomponent-binding protein_ mitochondrial OS=Homo sapiens OX=9606 GN=C1QBP PE=1 SV=1	4.55	31761.5	16905.4	Q07021	7	41.84	0	C1QBP_HUMAN	12737.7	32356	28335.3	147380	137598	156863	139149	134111	152612	126368	118055	137236	42131.3	42741	50795	21258.3	32478	33778	30689.3	36188	35206	119804	115847	111585	137740	124614	135247	132786	127942	118332	106152	103926	92716.3	37985	33662.7	26840.3	25827	15243	9436	14738	9824
Thioredoxin OS=Homo sapiens OX=9606 GN=TXN PE=1 SV=3	4.62	12022.7	16869.9	P10599	5	42.86	0	THIO_HUMAN	146483	133295	147389	105133	98100.7	75039	109481	106361	73723.7	121657	119608	89915.3	142863	147761	87129.3	133146	127605	99394	96870.3	145300	105263	62718	61028.3	59772	61942	61298.7	62526	68034.7	67092.3	62629.3	72149.7	74228.3	77419.7	74046.3	76791.3	113760	86922	88278.3	125513	84396	83673.3
Serine/arginine-rich splicing factor 2 OS=Homo sapiens OX=9606 GN=SRSF2 PE=1 SV=4	12.34	25476.4	16829.8	Q01130	11	39.37	0	SRSF2_HUMAN	35788	34924.7	37161	40461.1	36602.4	34584.1	41067.3	41726.3	39997.3	41301	41545.7	42622.7	31631.7	30026.7	32640.3	40235.5	39428.9	32262.9	58458.3	59309.3	59380.3	49386.9	47610.5	45459.8	49715	43726.9	48451.2	53049	50870.7	50648	51309	51144.7	50878.3	52768.3	48329.3	44351	28504	26999.3	25056.7	44268	47963.7
T-complex protein 1 subunit gamma OS=Homo sapiens OX=9606 GN=CCT3 PE=1 SV=4	6.09	61104.3	16807	P49368	34	54.13	0	TCPG_HUMAN	115903	126945	137401	141886	171989	160409	140637	159847	128253	154335	153800	152524	155184	160885	122873	88603	82562	78968.3	98470.7	95962.7	89541.7	91380.7	90881	89965.3	79247	77971.7	81569.3	82131.7	83808.3	84972	97619	102178	94558	75165.7	76466.7	75637	71168.3	72852	70020.7	64224	62018.3
Enhancer of rudimentary homolog OS=Homo sapiens OX=9606 GN=ERH PE=1 SV=1	5.55	12430	16793	P84090	4	24.04	0	ERH_HUMAN	37571	37840.7	35363	26221	20545.7	25573.7	19037.7	17604.3	23421	31274.5	26519.3	33439.3	41943.5	40718	57793.5	54375.3	52483.7	58877.3	55340.7	55936.7	62394.7	27542.7	25704.3	24911.7	29450	28583	28061.7	29740	30369	28079.7	39077.3	40792.7	43627.3	53465.3	53116	58771.7	74627	74424.3	69337.3	75090	75704.7
Programmed cell death protein 5 OS=Homo sapiens OX=9606 GN=PDCD5 PE=1 SV=3	5.69	14285.1	16783.5	O14737	9	67.2	0	PDCD5_HUMAN	42288	45568.7	43664	35261.3	33434.7	35096.3	34396.7	32256.3	31926.3	45445.7	39217.3	40637.7	53544.7	52997	44279.7	57409.7	53952	50977	62547.3	60579	64092.7	45945.7	48102	44856.7	51581.3	46893.3	50517	50878.7	51770.3	50128.7	60560	62570.7	59931.3	60489.3	58919.3	56008.3	51436	46134	37928.3	53813.7	50920.3
Tropomyosin alpha-4 chain OS=Homo sapiens OX=9606 GN=TPM4 PE=1 SV=3	4.47	28635.9	16760.3	P67936	11	33.87	0	TPM4_HUMAN	81752.2	86369.5	88948.9	56158.2	57495.4	58207.7	61608	61003.6	69205.8	74668.7	75413.7	79119.3	89629.3	89468.5	92141.3	96304.9	99832.9	102756	112271	113879	114975	50523.5	49949.4	51579	57463.9	57131.8	57979	58112.5	59408.3	58637.1	80299.1	80477.3	77210.8	89873.3	89465.4	89250.9	113267	117361	115842	125571	133514
Enoyl-CoA hydratase_ mitochondrial OS=Homo sapiens OX=9606 GN=ECHS1 PE=1 SV=4	8.07	31843.7	16711.6	P30084	10	34.48	0	ECHM_HUMAN				50735.7	51905.3	52341.7	46088	46117.7	49645.3	63448	59648.3	64537.7			2253.5							51291	46174.3	48587.7	44005.7	45420.7	47050.7	48098	47450.7	45495.3	54230.3	54031.7	54610	4486.67	4322	3808.67	3811.33	3601.33	5825	4000.5	3752.5
Y-box-binding protein 1 OS=Homo sapiens OX=9606 GN=YBX1 PE=1 SV=3	10.29	35924.2	16669	P67809	16	56.48	0	YBOX1_HUMAN	27342.5	24830.1	23443.7	46697.1	44335.6	58947.4	39035.9	37499.6	57257.5	33129.4	34582.8	53040.3	28924.1	27243.8	50845.3	41534.8	37882.6	56711.5	58341.9	60325.9	91944.4	64452.4	66895.7	61809.6	77505.8	81260.3	79386.3	73885.3	73341.5	72902.3	97208	99859	95250	81043.5	85624.1	82137.3	111575	107903	107103	126295	124329
Histone H2B type 1-C/E/F/G/I OS=Homo sapiens OX=9606 GN=H2BC4 PE=1 SV=4	10.99	13906.2	16615.7	P62807	5	34.13	0	H2B1C_HUMAN	14468.2	13256.5	11176.2	22802.6	24278.7	19680.2	13832.6	13377.8	8241.59	13195.2	13466.9	10307.5	8544.17	8232.87	6055.62	7724.75	7278.49	7781	14573.9	15112.2	15187.5	35202.5	23112.3	22811.7	33918.4	37867.5	30818.1	26119.8	23112.1	32953.5	33719	34044	31278	20022.5	19848.5	19040	16493.5	15103.5	14919	25172	23943.5
Adenosylhomocysteinase OS=Homo sapiens OX=9606 GN=AHCY PE=1 SV=4	5.92	48286.5	16575.5	P23526	15	38.19	0	SAHH_HUMAN	120807	117813	132714	123481	124877	130731	128814	127813	139412	150289	146779	164860	131162	130433	140253	69788.7	68429.3	72487	23148.7	22351.3	24634	146124	144280	142522	145042	138492	138772	152909	158809	140894	179154	163909	170829	154609	154584	145332	86684.7	86661	83810.7	24672.3	22937.7
Histone H2B type 1-B OS=Homo sapiens OX=9606 GN=HIST1H2BB PE=1 SV=2	10.99	13950.2	16511.1	P33778	5	34.13	0	H2B1B_HUMAN	7506.15	6897.52	5126.44	12024.5	13211.4	9961.85	8150.03	8181.01	5204.6	7927.78	8095.43	5383.86	7828.24	6533.05	4701.57	6813.37	5937.26	6474	7593.43	7905.14	7220.5	15170.5	10096.4	10056.9	13386.9	12222	11482.6	11741.6	11444.6	14675.5	14240.5	13961	13853	9049	7700.5	7902.5	6966.5	7118.5	6308	10593.5	9864
Proteasome subunit alpha type-7 OS=Homo sapiens OX=9606 GN=PSMA7 PE=1 SV=1	8.74	28058	16379.6	O14818	15	50.81	0	PSA7_HUMAN	83082.7	87106	93603	48739.4	52312.2	60265.1	51166.8	53436.7	54690.4	73178.7	72045	78807.7	85936.3	90069.3	90258	99138.7	100025	109282	117876	115015	130738	65688.5	63065.5	60123.6	59171.8	51221.7	50217.3	62437.7	60981.2	55429.6	90095.7	82519.3	82337.3	93133.4	88367.6	86122.4	126910	130339	116575	127262	123798
40S ribosomal protein S20 OS=Homo sapiens OX=9606 GN=RPS20 PE=1 SV=1	10.71	13486.8	16339	P60866	4	42.02	0	RS20_HUMAN	28009.5	28001	28321	31679	34535.7	29653	41118.5	31423	26385.3	21586	22823.7	19485.3	31589.5	31211.5	26699	17706.5	18449	10976.7	28296.5	25741	22258	50949.5	34915.3	51476	42133.7	61658.5	53561.5	57306	59118	56817	50205	49186.5	52333	39922	37442	39104.5	17366.5	16561.5	14983.5	32095.5	30328.5
Tubulin beta-3 chain OS=Homo sapiens OX=9606 GN=TUBB3 PE=1 SV=2	4.64	50889	16157.5	Q13509	15	36.89	0	TBB3_HUMAN	3868.39	4412.94	3920.42	3815.7	4161.22	5309.61	5818.61	6587.36	9929.55	4335.37	4352.98	5172.75	5262.21	6424.71	8265.73	3192.12	3610.98	4976.22				9351.19	9336.41	8996.2	3289.97	5606.66	4361.21	2074.81	2294.19	2785.77	2298.37	2185.83	3570.4	1410.34	1459.81	1268.73
T-complex protein 1 subunit eta OS=Homo sapiens OX=9606 GN=CCT7 PE=1 SV=2	7.53	59880	16140.1	Q99832	26	51.38	0	TCPH_HUMAN	66329.7	81050	83289.3	94998.3	94213.3	98522	89615.3	90583	91335.7	118588	112116	119153	69968.3	67035.3	71174.3	33949	33710.7	33735.7	20857	20287.7	20406	101606	99999.3	99218.7	94090.3	87324.3	90124	91772.3	89324.3	91046	109047	109046	109810	88083.3	86198	83711	47758.7	46842	43894.3	21687	21423.7
Ubiquitin-like modifier-activating enzyme 1 OS=Homo sapiens OX=9606 GN=UBA1 PE=1 SV=3	5.39	118933	16118.3	P22314	39	47.92	0	UBA1_HUMAN	25751.3	25632.3	24666	163935	161076	163165	158268	150899	162716	67932.3	59472.7	67460.7	26155.3	25823.3	27679.7	25755.7	22493	25805.3	21995.7	20459.3	23508.3	166248	162728	162098	149619	157884	147983	152137	149766	150077	59392.3	59344.7	61069.3	30113.3	30260.3	30233	26044	25292.7	23977.7	24746	22862.7
Proteasome subunit alpha type-5 OS=Homo sapiens OX=9606 GN=PSMA5 PE=1 SV=3	4.54	26582.2	15954.1	P28066	10	46.47	0	PSA5_HUMAN	85664.3	86099.7	88855	59779	63575.7	74111	69026.7	64393	60640.7	79746	74148.7	72310	94397.3	97157	108324	104969	101337	112509	113424	119806	132868	57088	56879.7	55291.7	57272	55913.3	55938	60444	58241	56455.3	89589	68762	74865	93473.3	77862.7	73546	123552	119354	99299.7	126698	108712
Peptidyl-prolyl cis-trans isomerase FKBP3 OS=Homo sapiens OX=9606 GN=FKBP3 PE=1 SV=1	9.95	25233.9	15747.8	Q00688	11	42.41	0	FKBP3_HUMAN	31579	32466.7	31709	55729	57420	62825.7	50216	55164.7	56290.3	39101	36647	39518.3	39247.3	38751	36548	29806.3	25863.3	24921	45763.3	46076.7	42881.7	78365.3	74479.7	72239.3	90170.3	84918	88490	90268	85473.7	78883.3	69760.3	66476.3	66881	62799	57206.7	53676	44157	40102.3	36178.7	58417.7	56116
Transketolase OS=Homo sapiens OX=9606 GN=TKT PE=1 SV=3	7.49	68562.1	15652.6	P29401	28	48.15	0	TKT_HUMAN	153048	161852	167410	134115	126443	131257	137075	127151	144083	163472	157261	172774	171634	176974	188262	164073	157987	181261	186670	170717	203266	116478	117276	112930	112137	94328	106681	113834	105004	100033	136883	135854	126632	147787	144484	135126	149858	166354	151449	138731	139256
Keratin_ type II cuticular Hb6 OS=Homo sapiens OX=9606 GN=KRT86 PE=1 SV=1	5.41	55154.5	15623.5	O43790	16	30.45	0	KRT86_HUMAN				4935.89	3414.63	5252	5062.44	4908.12	5013.5	4024.52	4065.36	5019.67	686.91	665.639					1290.92	1323.25	1634	4754	4671	4867.5	5338	3955	4320.33	4240	4889.33	4934.67							1584.5	2258.5	1480
Eukaryotic initiation factor 4A-II OS=Homo sapiens OX=9606 GN=EIF4A2 PE=1 SV=2	5.17	46630.5	15572.5	Q14240	21	46.93	0	IF4A2_HUMAN	27774.5	27368.4	27056	29819.3	29446.3	28282.3	33493.5	32889.5	32540	35918.1	35345.9	32383.3	19182.2	19418.4	16742.9	14896.9	15850.3	13820.4	10760.9	11105.6	10160.7	23964.4	26059.3	25572.6	9581.13	9226.67	9884.52	22048.9	11382.6	11376.4	10013.5	9925.69	10028.9	9123.71	8813.37	8651.17				3478.36	3250.34
Malate dehydrogenase_ cytoplasmic OS=Homo sapiens OX=9606 GN=MDH1 PE=1 SV=4	7.19	36654.3	15554.2	P40925	23	44.31	0	MDHC_HUMAN	152932	140701	153213	122882	120477	131556	123094	122814	135215	158345	144033	161871	146778	147808	160483	44015	42264	37985.3	22344	22811	23511.7	132419	122749	124805	118711	105466	109967	119248	120045	109763	153807	153602	151017	138811	139802	135179	34284	32803.3	31193.3	18829.7	18753
Putative heat shock protein HSP 90-beta-3 OS=Homo sapiens OX=9606 GN=HSP90AB3P PE=5 SV=1	4.51	68667.1	15455.4	Q58FF7	20	25.8	0	H90B3_HUMAN				16859.8	15174.6	14492.1	18636.3	15321	18358.6	30071.1	30897.2	27808.2	22391.3	22795.1	19607.2	18271.5	13530.3	18901.7	4513.75	4476.72	3911.89	21846	17388.2	19433.1	18658.5	25673.6	18619.2	20981.5	21984.1	22133.4	26148.8	25923.4	27724.5	26907.8	29810.2	29317.7	54198.2	56652.8	58325	7112.08	6822.76
Proteasome subunit alpha type-1 OS=Homo sapiens OX=9606 GN=PSMA1 PE=1 SV=1	6.19	29840.8	15360.1	P25786	15	53.61	0	PSA1_HUMAN	62165.7	65136.7	65059	38638.7	39256.3	41747.7	34318.7	33365.7	38756.3	49100	47292.3	49182.7	54698.3	55532.7	61419.3	77454.7	76519.3	73639.3	81138	87386	86411.3	43674.7	45258.7	44165	45358.3	44533	44307	45329	43664.7	45438	60522.3	59351	60878.3	65174.3	70038	66058.7	89909.7	90443.7	93022.7	96263.7	101922
Heat shock-related 70 kDa protein 2 OS=Homo sapiens OX=9606 GN=HSPA2 PE=1 SV=1	5.42	70306.2	15285.4	P54652	29	53.99	0	HSP72_HUMAN	9511.46	8626.15	9311.74	12914	12090	11618	9116.33	8324.79	9318.37	6900.46	6761.78	8023.88	7551.98	7506.5	8649.74	6589.89	6051.65	6675.51	10287.6	10184.1	15756.7	13874.1	13703.8	14328.2	14458.5	17752	14720.7	13030.6	13587.3	12610.7	12638.3	13181.5	13101.4	10081.9	10179.8	10091.2	8909.91	9288.56	9808.93	13626.1	13440.9
40S ribosomal protein S16 OS=Homo sapiens OX=9606 GN=RPS16 PE=1 SV=2	10.79	16559.4	15284.9	P62249	9	47.26	0	RS16_HUMAN	17590.5	11943	12485.5	22991.3	23846	20867	21708.3	20467	18148.7	15779.3	18462.5	10009.7	13958.5	11405.5	7628	6715	10170	5317	14700.5	13326	7234.33	25722.7	23437.7	23592.3	21790	25716	22894	18122.7	18675.7	19377	19095	18877.7	20797.3	11846.3	12239.3	11972.7	5374	5159	3272.5	17453.5	16843.5
Lactoylglutathione lyase OS=Homo sapiens OX=9606 GN=GLO1 PE=1 SV=4	4.94	21005.9	15269.3	Q04760	10	63.04	0	LGUL_HUMAN	131716	119965	135344	118750	104695	112953	113985	101151	106750	118377	121341	136746	113092	111403	117971	104646	91157.7	95588.3	82881.7	81333.3	85664	105765	101177	104216	109410	99464.3	103363	121602	113086	109307	139520	141704	128869	127650	124880	121092	102214	82906	82496.3	57081.3	53210.3
Elongation factor 1-alpha 2 OS=Homo sapiens OX=9606 GN=EEF1A2 PE=1 SV=1	9.49	50812.4	15179.1	Q05639	20	55.72	0	EF1A2_HUMAN	11413.4	11273.2	11118.9	25164.4	23916.3	26617.1	16329.4	18478.6	18223.5	16008.6	18971.7	18234.8	8765.79	9270.43	8663.1							25427.2	25804.2	25611.1	16129.9	15086.2	15277.6	16731.7	17981.4	16994.8	8137.22	8330.21	8434.31	8527.81	8605.61	8754.42	4404.91	4453.69	4440.59
Adenine phosphoribosyltransferase OS=Homo sapiens OX=9606 GN=APRT PE=1 SV=2	5.67	19778.9	15081.4	P07741	10	44.44	0	APT_HUMAN	69656	69112.7	72154	53157	53506.3	56499.7	54537.3	54461	61646.7	65062.7	67618	78716.7	71033.3	64739.3	63317.7	57415.7	53201	57811	50957	50224.3	54280	75948.7	73302.7	74870.7	61113.3	63605.3	61922.7	66270	70803.3	64635.7	77794.3	76712	78539.3	89382.7	88420	85305.3	85007	81167.7	80975	53612.3	49154.7
Thioredoxin-dependent peroxide reductase_ mitochondrial OS=Homo sapiens OX=9606 GN=PRDX3 PE=1 SV=3	7.7	28034.8	15067	P30048	9	39.06	0	PRDX3_HUMAN	163900	157546	158730	105295	105590	108755	111886	106575	113780	131695	127012	130144	148441	150565	177354	142439	129048	142626	122073	128668	128639	117907	111597	115084	102308	109632	103768	109868	109065	114833	153416	152576	154006	165227	164848	163862	159239	157325	157097	112166	112662
T-complex protein 1 subunit zeta OS=Homo sapiens OX=9606 GN=CCT6A PE=1 SV=3	6.26	58480.5	15054.7	P40227	20	37.66	0	TCPZ_HUMAN	79719.7	76300.3	85528	98185.8	104971	101342	101285	105536	106815	116080	115813	121767	82098.1	84672.7	82446.7	23036.7	23484.5	22197	20058	21656.3	20312.3	84290	83549.7	82523	80675.3	83176.5	83120.7	85778.1	83200.1	81399.9	100427	102900	105486	81276.6	76483.7	75608.5	30075	29708.7	26905	19706	18725.7
Myristoylated alanine-rich C-kinase substrate OS=Homo sapiens OX=9606 GN=MARCKS PE=1 SV=4	4.26	31725.8	15011	P29966	12	68.07	0	MARCS_HUMAN	39807.7	37352.3	35378.7	37282.7	33993.7	54877	37755	34293.3	58073	35853.7	33829.3	56568.3	46094.7	46459.7	69888.7	52610.7	46727	67927	57537.7	60573.3	92355	59765.7	61270	61918.7	61841.7	64511.7	67489.3	61675.3	68404.7	65502.7	72445	75944.3	85237.7	79093	86899	84564.7	93282.3	95344	97349.7	105520	98473.3
D-dopachrome decarboxylase OS=Homo sapiens OX=9606 GN=DDT PE=1 SV=3	7.19	12825.8	14993.9	P30046	9	51.69	0	DOPD_HUMAN	75735	91207.7	76935	67538.3	52590.3	51018.7	55397	53070	41816.7	80682	62937	49259.3	104421	98307	47976.3	109921	78440.7	68325	106426	97004.7	63729	52561	47020.3	42194.3	47669	39864.3	42518.7	53505	52543.3	48137.3	61741.3	57906	59769.3	62166.3	55953.7	50984.3	59960.7	54951.7	48544.7	59811.7	55349
Heat shock 70 kDa protein 6 OS=Homo sapiens OX=9606 GN=HSPA6 PE=1 SV=2	5.75	71484.5	14766.3	P17066	18	30.79	0	HSP76_HUMAN	1788.49	1534.4	1720.98	8692.98	9518.75	10303.6	9027.53	8140.75	10811.2	10471.7	10712.8	11931.4	9452.55	10162.2	11184.5	7751.35	7654.2	8147.77	2370.69	2606.25	3733.22	7520.52	7691.98	10468	10741.8	21444.3	13495.6	7162.6	7348.19	8586.59				20997.6	20716	25222.3	7555.44	7467.62	7552.36	6527.87	6557.96
Myosin light polypeptide 6 OS=Homo sapiens OX=9606 GN=MYL6 PE=1 SV=2	4.36	17101.2	14716.2	P60660	7	49.01	0	MYL6_HUMAN	44679.3	46488.2	47754.6	71764.6	73724.5	74629	70831.7	71036.5	75589.6	62332.8	58582.5	55418.2	56061.2	57884.5	56547	51648.7	47388.2	46318.1	58837.8	66039.8	62306.4	71904.9	69562.2	70059.1	64900	64451.2	64405.8	72407	69452.4	72142	55009.1	51246.7	52928.8	47345.9	45871.3	45842.1	62199.9	59129.6	57250.9	80432.3	81717.2
Protein SETSIP OS=Homo sapiens OX=9606 GN=SETSIP PE=1 SV=1	3.99	34882.4	14661.7	P0DME0	8	25.83	0	SETLP_HUMAN				4446.05	4284.44	5015.42																3929.92	4020.5	4051.62	4041.64	4021.17	4054.72	3342.19	3438.05	3151.41
Keratin_ type I cytoskeletal 16 OS=Homo sapiens OX=9606 GN=KRT16 PE=1 SV=4	4.79	51610.1	14536.3	P08779	28	60.04	0	K1C16_HUMAN	27256	26985.8	27301.5	14195.4	13676.6	20491	19453.7	20407.2	27460	22444.5	22281.1	27862.6	16140.1	16199.2	16113.4	70974.7	70944.3	76412.7	26730.1	27084.9	34381.1	23742	21630.9	22145.7	18986	19100.6	18685.4	24882.3	22772.4	22422.8	31954.9	32412.5	30865.4	32308.7	33268.3	29646	37219.2	36992.8	36160	38009.9	35773.8
Keratin_ type I cytoskeletal 14 OS=Homo sapiens OX=9606 GN=KRT14 PE=1 SV=4	4.9	51903.7	14518.6	P02533	27	53.18	0	K1C14_HUMAN	34780.4	34506.7	35238.9	11436.4	10928.9	12191.7	14144.1	14637.4	15297.6	19262.3	18516.5	20013.8	10073.1	10500.1	11239.5	104242	95223.8	107834	28392.9	25712.2	28152.3	11887.6	11788.2	11946.1	28735.2	26798	30880.8	36320.2	35910.2	38462.1	45607.1	45501.5	46180.5	120334	111709	110693	38010.2	39697.4	38006.1	53795.9	53336.2
Translationally-controlled tumor protein OS=Homo sapiens OX=9606 GN=TPT1 PE=1 SV=1	4.64	19709.5	14411.1	P13693	8	66.86	0	TCTP_HUMAN	20611	32519.5	34044.5	46221.7	43797.7	49539.3	46600.7	44258.7	47587.2	56504.8	52370	61999.2	24263	21136.3	28092.5	29016.5	28734	29388	34086.5	36015	37087	73486.7	66147.7	61644	66381.9	56760	65466.4	72438.3	69891.7	60620.3	73240.3	64394.7	56795.3	45141	42270.3	32061.3	18998.3	18857	17955.3	29505	31429.5
Elongation factor 1-delta OS=Homo sapiens OX=9606 GN=EEF1D PE=1 SV=5	4.71	31235.9	14397.3	P29692	10	44.84	0	EF1D_HUMAN	25384.3	23253.7	24566	68580	68929	76531	68810.3	69548	70349.7	37717.3	34797.3	35844	22887	22045.7	20967	22502.3	21697.7	24618.3	32288	29326.3	31911	77016	83479	81955.3	88017.7	86720.3	88608	87154.3	87955	83277	37267	36918.3	33345.3	30354.7	31497.3	29897	47917.7	44812.3	43215	47832	43627
40S ribosomal protein SA OS=Homo sapiens OX=9606 GN=RPSA PE=1 SV=4	4.81	32968.2	14307.9	P08865	16	52.88	0	RSSA_HUMAN	42753.3	44168.3	43223.7	126308	130263	127977	114039	113970	120843	80632	80138.7	85809.3	34963	33965.7	38157	18089.3	17733.3	18591.7	21603.3	21594	23181	125111	127097	125393	117656	132466	122827	120644	124045	118991	99314.7	96251.7	100776	78939	78470.7	79130.3	30025.7	30309	30304.3	28146.7	27816
40S ribosomal protein S28 OS=Homo sapiens OX=9606 GN=RPS28 PE=1 SV=1	11.31	7898.07	14276.5	P62857	2	30.43	0	RS28_HUMAN	21940.5	24458.5	24066	9403.5	8710	9979	12184.5	10338.5	10733	10966.5	8262.5	10152.5	19757.5	15962	16345.5	17630	15978	18737.5	27869.5	27415	27675.5	29354	28574	28403.5	30100.5	32333	32396.5	36067	35383.5	34292	42519.5	39635	45568	49486.5	45429.5	44644.5	39230.5	36171.5	35905.5	59657.5	61688.5
Cystatin-B OS=Homo sapiens OX=9606 GN=CSTB PE=1 SV=2	7.52	11196.6	14217.7	P04080	4	53.06	0	CYTB_HUMAN	22381.7	22420.7	21310	29869.7	29436.7	31506.7	25785.3	26794.7	27684.3	36871.3	35176.3	34740	25317.3	27560.3	26192.3	15084.3	15604.7	13685.7	16912.7	17704.7	16715	31058	25118.3	28166.3	38598.7	32306.3	37475	44094.3	39564.7	38003.3	34077	34129	30440.7	19162	20505	18807.3	11625.3	11259.3	10517.7	16081	15654
Elongation factor 1-gamma OS=Homo sapiens OX=9606 GN=EEF1G PE=1 SV=3	6.27	50461	14178.1	P26641	22	53.32	0	EF1G_HUMAN	19616.3	18674	17874	124228	117744	133702	107596	108556	115877	61772.3	57198.3	58902.3	16880.3	15752.3	18645	11264.7	12517.3	11074.3	13087.3	14865	13296.7	162582	155699	143355	156449	139877	138442	146660	136120	124299	44825	42686.3	44047.3	39956.7	38689	38398	33534	32697	32562	31064.7	29869.3
Putative keratin-87 protein OS=Homo sapiens OX=9606 GN=KRT87P PE=5 SV=4	5.52	29573.3	14090.2	A6NCN2	12	45.49	0	KR87P_HUMAN				4978.25	4935.25	5252	5075	5283.75	5013.5	4665.67	4442.33	5019.67	734.667	733.333							1634	4754	4671	4867.5	5338	3955	4320.33	4240	4889.33	4934.67							1584.5	2258.5	1480
X-ray repair cross-complementing protein 6 OS=Homo sapiens OX=9606 GN=XRCC6 PE=1 SV=2	6.23	70128.3	14050.5	P12956	35	57.31	0	XRCC6_HUMAN	38257.7	34901.3	36353	102610	97418.7	104082	86275.3	85332	88910.3	58865	55932	60383.7	37464	32917	36978	35915	31806	34755.7	41848	40212.3	46881.7	91332.7	89989	91999	80217	78980	81608	73110	70827.7	74062	42680.3	43187.7	42721.7	41493.7	41383.3	41707	44418	43824	40175	42939.3	44207.3
Heat shock 70 kDa protein 4 OS=Homo sapiens OX=9606 GN=HSPA4 PE=1 SV=4	4.91	95186.5	14011.2	P34932	49	58.1	0	HSP74_HUMAN	18372	18392.3	17623	84031.7	82603.3	94863.3	85226.3	82041.3	88398.3	81788.7	74406.3	87250.3	17646	17750.3	18609	16666.7	15755	16627	19092.3	19756.7	18200	86541.3	83406	78618	86955	81921	86830.7	90605.3	93930	82461.3	68025	67094	67828.7	22558.3	22903.3	21823.7	19940	19177.3	17534	18083.3	17694.3
40S ribosomal protein S8 OS=Homo sapiens OX=9606 GN=RPS8 PE=1 SV=2	10.96	24490.3	13838.7	P62241	7	36.54	0	RS8_HUMAN	23413.3	21137.3	22034.7	51536.7	52959	45580.7	48224	46397.3	42795.3	33634	35083	32243.3	24477	23454.7	22041.7	12374.7	12125	11859	25622	25139	26574.7	26197.7	23238.7	22719	27284.3	26931.3	28973	23475.3	21323	19892.7	26165	26222.3	24776.3	18911.7	19326.3	19236.7	6058.5	9309	8189	20015.7	18603.7
14-3-3 protein eta OS=Homo sapiens OX=9606 GN=YWHAH PE=1 SV=4	4.56	28389.9	13735.2	Q04917	14	47.56	0	1433F_HUMAN	38038.7	38847.3	38115.7	38183.3	42150.3	47704.3	43453.7	46423	45951.4	58460.3	53850	57481	44197	45818.3	40162.7	11772.2	11524	16845.3	12090.2	12835.8	17888.3	41906.3	42757	43682	40040.7	43408	41161.7	42779.7	44993.3	43564.7	52924	53700.3	55367	47031	46110.7	44978	20119.3	20337.7	18363	15635.7	15179.3
Hsc70-interacting protein OS=Homo sapiens OX=9606 GN=ST13 PE=1 SV=2	5	41502.9	13733.1	P50502	15	42.55	0	F10A1_HUMAN	57272.3	49528	51338.7	71867.2	73532.5	83934.2	74588.7	79566.8	86482.5	87973	83065	80628.9	43978.8	40966.1	44127.9	49506.4	43146.9	44442	48448.6	50735.8	52683.9	71694.1	78810.7	78626.8	75363	84094.4	81415.4	84240.2	84468.5	79978.3	75180.9	73825.9	69748.4	47627	47615.4	46575.8	70336.3	67056.3	64329.3	77939.7	76369
Small nuclear ribonucleoprotein Sm D1 OS=Homo sapiens OX=9606 GN=SNRPD1 PE=1 SV=1	12.07	13281.6	13724.3	P62314	5	54.62	0	SMD1_HUMAN	40887.7	48362	47115.3	32454.3	32740.7	37889.3	31176.3	37286.7	36219	47188.7	46723.3	55807	55807.7	57744	55972.3	54664.3	60197.3	56325.3	56608.7	65483.3	69088.7	41812.7	39562.3	37430	36848.3	32174	34832.7	40319	37584.7	32474.7	56346	53192.7	51831.7	54354.3	52881.3	50214	57614.3	50762.3	50388.7	46452	46696.7
T-complex protein 1 subunit delta OS=Homo sapiens OX=9606 GN=CCT4 PE=1 SV=4	7.79	58437.6	13653.9	P50991	24	54.92	0	TCPD_HUMAN	63843	64125.7	64746	96599	99536.3	97208.3	99711	104191	103938	117444	116658	119438	74499	80419	72853.7	18335.3	18032	17402.7	16748.3	18371.7	19727.7	90032	85152	79520.7	92582.3	93873	95521.3	92938.7	88619	82608	107524	102137	103530	76930.3	74820.3	78952.7	20871.7	22613.3	21925.3	21886.3	19660
Nuclear migration protein nudC OS=Homo sapiens OX=9606 GN=NUDC PE=1 SV=1	5.1	38300	13525.2	Q9Y266	23	61.93	0	NUDC_HUMAN	31056.3	30422	32087.3	95609.3	88816.7	90122.7	88120.7	84828	87778.3	84800.3	84987.7	85404.3	33367.7	32350.7	32670.7	19024.7	18747	19316.7	24093	24289.7	24533.3	106882	103813	106675	108870	107317	106467	105777	103177	101082	98034	92750.3	95763.3	54338	50886	50850	37946.7	38327.3	37328.7	34053.7	34245.3
Ornithine aminotransferase_ mitochondrial OS=Homo sapiens OX=9606 GN=OAT PE=1 SV=1	6.65	48877.1	13477.3	P04181	22	52.85	0	OAT_HUMAN	66700	62577.3	61644	58319	59211.7	62108.3	58678	59096.3	58111.7	72532	68334	61636.3	55429.7	49265.7	51235.7	23456.7	20508.3	21265.7	10496.7	9648	10188.3	74052	76422.7	75320.7	72028.3	65426.7	70879.7	73134.3	69816.3	69121.3	90698.3	92402.7	84860.7	80882	79517	75549.7	35592.3	34642.7	34950	14239.3	13828
Protein disulfide-isomerase A6 OS=Homo sapiens OX=9606 GN=PDIA6 PE=1 SV=1	4.76	48520.6	13459.9	Q15084	21	50	0	PDIA6_HUMAN	86617	98231.7	104752	91498	93393	90313.7	87729	92208.7	92494	114028	108541	110169	90815.3	91576	90378.3	95442.3	88645	87042.7	106295	100208	106342	96964.7	92974.3	91387	84120.3	81451	82262	86614.7	84698.7	82813.7	103748	109809	104242	87215	84701.7	81867.7	64875	63634	63077	68740.7	67731.3
6-phosphogluconate dehydrogenase_ decarboxylating OS=Homo sapiens OX=9606 GN=PGD PE=1 SV=3	6.89	53653.3	13420.6	P52209	17	33.54	0	6PGD_HUMAN	27880	27574.7	27216.7	91087.7	87226.7	95936.7	100258	93806.3	103751	114110	111673	119170	29473.7	29508	28258.3	10671	10283.7	9959.67	12183.7	12599	10592	91000	88991.3	89919	86140.3	89407	83069.7	87769.3	89939.7	88610	105672	104383	104212	30268.7	32209	31955.3	18132	18190.7	17271.3	13358.3	13180.3
ADP-ribosylation factor 4 OS=Homo sapiens OX=9606 GN=ARF4 PE=1 SV=3	7.05	20624.9	13412.9	P18085	10	60	0	ARF4_HUMAN	4101.55	3682.44	2962.05	10321.5	10335.8	9274.56	10773.8	10404	9899.13	6696.24	6537.34	5517.26	2495.93	3814.9	2631.55	2191.26	2075.96	3032.26	4263.17	4223.6	9562.01	17687.6	18270.9	17094.8	14450	13029.2	14192.5	11699	12599	11353.9	6767.56	7100.01	10054.1	6582.2	7798.94	9655.24	5558.57	5042.36	5586.92	8028.98	8506.21
Elongation factor Tu_ mitochondrial OS=Homo sapiens OX=9606 GN=TUFM PE=1 SV=2	7.39	49883.8	13273	P49411	22	51.55	0	EFTU_HUMAN	4376	3790	4556	67902	68235.7	70455.7	52595	51237.7	50277.3	21387	21039.3	19972.7	4533	4838	3255.67	5724	5040	6204	5565	6760	4153	63518	65965	64767.3	54757.3	53403.3	54784.7	43068.7	41639	41809.7	7992.33	7958.33	8105.67	4765.33	4707	5258.33	5000.67	4680.33	4767	9108.67	9255.67
Heterogeneous nuclear ribonucleoprotein A1-like 2 OS=Homo sapiens OX=9606 GN=HNRNPA1L2 PE=2 SV=2	9.36	34396.5	13254.3	Q32P51	14	41.25	0	RA1L2_HUMAN				10404.6	11190	12296	12888.2	13261.8	15796.7	10144	11609	11804.6										3619.82	3645.39	3464.63	7432.3	6910.15	6677.79	4969.94	4970.17	4197.11
60S ribosomal protein L5 OS=Homo sapiens OX=9606 GN=RPL5 PE=1 SV=3	10.19	34590.8	13154.8	P46777	18	44.78	0	RL5_HUMAN	27105.7	28014.7	26019.7	85744.3	100113	125005	92839.7	90587.3	113964	48174	46697.7	54257.7	29940.7	27592.7	27688.7	9124	8670.67	9898	16449.3	14998.3	19226.3	122050	123930	123000	121710	111804	120995	117275	113927	110690	93019	95040	92878.3	81616.3	84299.7	80455.7	16331.3	15901	14558.7	21850.7	17475
Tropomyosin alpha-3 chain OS=Homo sapiens OX=9606 GN=TPM3 PE=1 SV=2	4.49	33007.1	13090.7	P06753	11	28.42	0	TPM3_HUMAN	92341.7	103267	110056	60719.4	64494.3	63312.5	59599.1	69803.9	66104.9	83175.5	87229.4	81882.5	95568.2	109537	92845.1	84505.9	95530.9	93271.8	118177	118506	125488	45126.8	45361.5	44474.8	59700.4	50721	54295.5	63267.3	61317.4	62469.3	79461.8	81438.7	80020.9	76056.5	74962.1	74796.2	95338.2	98029.8	100831	103632	103157
Acidic leucine-rich nuclear phosphoprotein 32 family member A OS=Homo sapiens OX=9606 GN=ANP32A PE=1 SV=1	3.78	28699.5	13039.4	P39687	8	32.53	0	AN32A_HUMAN	131717	145695	161641	126816	118869	112400	127643	123302	113135	136967	131245	130430	136450	153180	150068	127869	128490	136593	159533	154889	173774	85949	83925.6	86217	86163.1	86727.8	95417.6	87933.5	89336.7	89165.4	109356	108931	116950	106733	107457	113332	101320	110177	101255	111865	102625
ADP-ribosylation factor 5 OS=Homo sapiens OX=9606 GN=ARF5 PE=1 SV=2	6.39	20643.8	12943.5	P84085	11	60	0	ARF5_HUMAN	9181.5	8891.34	9512.37	14629.2	14410.4	15594	18610.5	18939.3	20121.5	15909	16032.6	16125.5	10807.3	10384.4	10271	3586.02	3225.98	2805.89	4298.3	4176.55	4576.34	25901.1	27609.9	26234.6	23241.5	22598.2	23858.7	23069.9	22998.2	22911.4	19196.8	19861.4	20354.7	13684.9	12974.8	12536.6	5577.25	4974.84	4668.3	5244.45	5919.63
Eukaryotic translation initiation factor 3 subunit I OS=Homo sapiens OX=9606 GN=EIF3I PE=1 SV=1	5.28	36901.1	12856.1	Q13347	12	48.92	0	EIF3I_HUMAN	5076.33	4510.33	3788	49378.3	47696	52328.7	31292.7	30731.3	36262.3	9082	8629	9422.67	3846	5996	6543.67	5815	5342	6603	4237	3536	6022.33	59324	62542.3	61187.7	65466.3	60865	62323.7	57520	51901	54290.7	12706	13346.3	11809	12337.3	12466	11874.3	11492.3	11113.7	10348.7	7327.67	9302
Leukotriene A-4 hydrolase OS=Homo sapiens OX=9606 GN=LTA4H PE=1 SV=2	5.77	69912.7	12841.3	P09960	34	54.99	0	LKHA4_HUMAN	56243.7	55136.3	53776.7	53763	53378.7	61317.7	59333.3	55785.7	65922.3	72434.3	75140.3	80369.3	63667	63430	61322.3	12320.3	11464.7	11560.7	11247.7	10672.7	10073.7	59292.3	57622.7	59538.7	52570.7	52493	52849.3	53607	55928	55211.3	73146	73380.3	70105.7	61529.7	62863.7	57436.7	14811.3	13762	12266	11798.3	10974.3
Jupiter microtubule associated homolog 1 OS=Homo sapiens OX=9606 GN=JPT1 PE=1 SV=3	5.31	16014.5	12834.2	Q9UK76	9	78.57	0	JUPI1_HUMAN	36826.7	39005.3	37752	22182.3	22554.7	22941.7	20012	19388.7	19496.3	35507.7	32209.7	37582.3	43193.3	43978.3	47760.7	48946	46000.7	49459	59290	59511.7	59692	27933	29388.7	29234	34815.3	29546.3	34411.7	38335	39077.3	37685	50825.3	51433.3	48188.7	52502	52840.3	47399.3	71591	68951	67747	70500	70649
Plasminogen activator inhibitor 1 RNA-binding protein OS=Homo sapiens OX=9606 GN=SERBP1 PE=1 SV=2	9.26	45022.5	12824.3	Q8NC51	30	64.46	0	PAIRB_HUMAN	48060	45958	41184	66848	58112	52384.7	63620	55156.7	50067	53648	52080.7	57204.3	63367.3	59746.3	60686.3	64715.7	62404.7	57446.3	73792.7	74983	79844.3	58462.3	56920.3	54037.3	77089	74862.7	71054.3	77799.3	75341.3	72536.7	92747.3	88807.7	82548	92660.7	87581	86100	91825	85107	78325.3	122286	117828
Clathrin heavy chain 1 OS=Homo sapiens OX=9606 GN=CLTC PE=1 SV=5	5.36	193383	12812.1	Q00610	67	50.21	0	CLH1_HUMAN	26990.3	27681.7	27959.7	105166	109319	115952	123625	125515	143769	90394	82966.3	94558.7	24603	22159.3	24176	14413	16681	17295.7	15246	16078.7	19613.3	121733	117941	116813	109981	108239	108368	106286	111469	103714	59350.8	60533.9	57745.7	37357	36112.8	37358.7	12681	12016.7	11409.7	13168	11336.7
Heterogeneous nuclear ribonucleoproteins A2/B1 OS=Homo sapiens OX=9606 GN=HNRNPA2B1 PE=1 SV=2	9.27	37486.8	12791.3	P22626	21	68.56	0	ROA2_HUMAN	37250.3	39544.3	36518.3	89502.7	84146	88700	69124	65292.7	72500.7	52509.7	50323.7	53194.3	51515	49426.3	49950.7	39515	35467.3	34382	44594	46288	45096.3	93670.3	94515.3	92567	96299	95921.3	95712.3	82929.3	76898	83088.7	51831.3	52945.7	55260.7	44982.3	48677	45933.3	33605.7	34749	36004.3	47650.7	48917
Proteasome subunit beta type-3 OS=Homo sapiens OX=9606 GN=PSMB3 PE=1 SV=2	6.16	23234.1	12780.4	P49720	8	47.32	0	PSB3_HUMAN	28651.5	36359.3	34717.7	31953.7	31910.3	30889	29283.7	30681	29096.3	39569	41014.7	43419	46950	49269.3	46344.3	43500.7	51246.3	52706	56541.3	66885.3	55950	27305.3	25458.7	21118	27601.7	20915.7	25402	27540.7	24063.7	20045.3	28341.3	25538	25281	25440.7	23446.7	21960.7	8635.5	9859	8294.5	8863.5	14390
Small acidic protein OS=Homo sapiens OX=9606 GN=SMAP PE=1 SV=1	4.37	20389.6	12741.2	O00193	5	36.61	0	SMAP_HUMAN	38194.7	38029.7	36950.7	23226	23490.7	19024	24779.3	25370.7	17673	33981	30981.3	25594.7	44292	43254.3	42620.7	55493	49732	52358.7	64005.7	63025.3	69314.3	17445.7	16952.7	16129	20868.7	17165	21089	21805.3	21780.7	19109.7	33300.7	33392.7	29735.7	34197	33020.3	28429.7	32601.7	27402	21780.3	51493.5	44083
ATP synthase subunit beta_ mitochondrial OS=Homo sapiens OX=9606 GN=ATP5F1B PE=1 SV=3	5.1	56560	12648.8	P06576	22	56.71	0	ATPB_HUMAN	79590	84825.3	87564	47823.7	46006.3	46788.7	40631.3	43055.3	40612.7	46395.3	46575.7	46379.7	86180	89918.7	90908.3	113067	108983	117368	80733.3	84766.7	84136.3	67383	65194	64612	63563	59567	61432.7	65570.7	65357.3	59753	85132	84063	81620.7	108252	105353	104304	148993	141108	130613	55583.3	50708.7
ATP-citrate synthase OS=Homo sapiens OX=9606 GN=ACLY PE=1 SV=3	6.98	121752	12587.2	P53396	50	49.32	0	ACLY_HUMAN	12383.3	12827.7	13454.7	68672	66591	68337	71359.7	66892.7	69221.3	47830.3	43825.3	43946.3	12331	13181.7	12564	7150.67	9020	13994	11860.3	22385.3	28594.3	79258.3	78726	75766.3	67107.3	61461	68891.3	70409.3	74506.7	70563.7	32325.3	32491.3	28055	11749	11533.3	11915	7800.33	11997.7	17269.7	9395.67	11347.7
Receptor of activated protein C kinase 1 OS=Homo sapiens OX=9606 GN=RACK1 PE=1 SV=3	7.57	35533	12569.9	P63244	11	35.65	0	RACK1_HUMAN	22422.7	20235.7	19781	80416.7	80204	88245.7	73856	71204	76799.7	43247.3	42492.7	43548.7	19888.3	20443.3	19946.3	9589	9029.67	10281.3	12253.3	12654.3	11402	99263	103298	103016	102893	100747	102224	95701.3	100625	97418	76932	75121.7	75293.7	60255.3	56720.7	51866	23872	21343.3	22444.3	27546	23763.7
Keratin_ type II cytoskeletal 5 OS=Homo sapiens OX=9606 GN=KRT5 PE=1 SV=3	7.8	62606.6	12565.3	P13647	25	36.27	0	K2C5_HUMAN	41495.9	44048.4	43973.6	15937.6	14419	16092.7	14796.8	10294.5	13954.3	19162.3	19373.8	17761.6	21055.2	17620.6	17479.8	125289	119810	121165	29931.4	29740.4	26868.7	17977.8	18091.4	18178.3	33298.3	31911.4	33981	38905	36126.7	39499.9	46368	49477.4	46465.1	119175	115730	119639	38702.4	39925.9	39586.1	54193.3	53888.8
Activated RNA polymerase II transcriptional coactivator p15 OS=Homo sapiens OX=9606 GN=SUB1 PE=1 SV=3	10.31	14395.4	12436.7	P53999	10	65.35	0	TCP4_HUMAN	57418.3	58719.7	62248.3	74356	70497.3	72726.3	77080	72477.7	72922.7	74223.7	71077.3	68424.3	60389.3	58209.7	54699	51126.3	42950.7	35781.7	58703.7	55429.7	55704.3	87447	88146.3	80276	95874	91831.3	91012	97276	94186	96526	96142.3	91009.3	86508.3	91725.7	81162	77069.7	80031.7	73431.7	64578.3	89554	81938
3-hydroxyacyl-CoA dehydrogenase type-2 OS=Homo sapiens OX=9606 GN=HSD17B10 PE=1 SV=3	7.83	27151.2	12423.3	Q99714	10	61.3	0	HCD2_HUMAN	10775	9993.67	8891.67	24532	26481.7	20538.3	24151.7	24872.3	21675.7	33719	33871.3	28809	10284	9921	11164	18125	17130	24256	19113	20014	27084	25934.3	24791.7	25414.3	24879	26390.7	23054.7	26710	28965.7	27460.7	35023	34718.3	36748.7	15313	15232.3	14929.3	3053	3116	2723.5	3730.33	5294.33
Peptidyl-prolyl cis-trans isomerase NIMA-interacting 4 OS=Homo sapiens OX=9606 GN=PIN4 PE=1 SV=1	10.48	13867	12327.9	Q9Y237	5	53.44	0	PIN4_HUMAN	8318.33	8863	7345.33	13687	14399.3	16212.7	16721	16226.7	18718.7	13187	13163.7	14248	9203.33	9681.67	10856.3	7713	5923	5406.67	12110	7932.5	8934.33	18163.3	18224.7	19384.3	23065.7	22969.7	23158	26783.3	25706.3	25811.7	16825	16662.3	16703	12756	13596.3	12751	11675	10830.3	9956.67	21044.7	19896.3
Spliceosome RNA helicase DDX39B OS=Homo sapiens OX=9606 GN=DDX39B PE=1 SV=1	5.32	49447.7	12310.5	Q13838	19	42.06	0	DX39B_HUMAN	27263	28170.6	23244	74768.5	74292.4	78996.7	68846.8	69322.7	70361.5	91085.9	93566.4	97434	55228.2	49316.2	50564.8	22457.6	11207.9	20892.3	12427.9	11266.5	13737.7	56624.7	57763.7	55724.1	55923	52692.1	56209.5	55001.9	52212.7	56628.9	41395.3	44520.3	42117.3	19556	17739.7	16624.7
Acyl-CoA-binding protein OS=Homo sapiens OX=9606 GN=DBI PE=1 SV=2	6.17	10044.4	12282.1	P07108	4	47.13	0	ACBP_HUMAN	6391.5	10399	10244.7	9530	5119	15023	5568	8164		6288	8463		10208.5	10287.7	13551	9487	10612	10410.5	12071.3	12020.5	12048.5				16898				16352		8686			6765	7225	6916
Stress-induced-phosphoprotein 1 OS=Homo sapiens OX=9606 GN=STIP1 PE=1 SV=1	6.42	63266.7	12273.7	P31948	37	51.2	0	STIP1_HUMAN	73409.3	75793	75756.7	89207.7	78134.3	82736.7	82894.3	74463.7	85422.7	77678	77312	76206.3	71946	74099.7	70095.3	49959.3	49135.7	45868.3	51980	54201.7	52167.3	94373	90525.7	90675	91627	95293.3	93576	91275.3	91937.3	91567.3	101027	103897	103600	103334	102809	104678	77656.7	80820.3	81257	85859.3	82508
Aspartate aminotransferase_ mitochondrial OS=Homo sapiens OX=9606 GN=GOT2 PE=1 SV=3	9.36	47916.9	12199.1	P00505	20	48.6	0	AATM_HUMAN	96215.3	92308	95861.3	48974.7	49446.3	47632	46577	46062.3	51441.7	76072	72909.7	80727	76342	74631	80155.7	107306	107083	115734	116716	119097	132307	56639.3	56102	57098	52339	56420.7	52636.3	55218.7	56930.3	55703	94374	95360.7	93654.3	101913	106163	100167	138539	134605	132184	136394	135583
Ezrin OS=Homo sapiens OX=9606 GN=EZR PE=1 SV=4	5.9	69527	12069.6	P15311	42	57.68	0	EZRI_HUMAN	15028.1	14404.5	13801.4	37821	42425	44937	42098.3	40478.3	42525	47182.3	44402.7	49244.7	16420.5	14540	16082.3	9628.33	8980.67	12618.3	9790.33	9417	15499	46367	49529	47996.3	46573	42232.7	45444.7	49537	49229.8	46330	52452.3	51557	58236.7	14643.2	15554.3	16285.3	10808.7	10613	10748.3	9362.33	9135.33
Glutathione S-transferase omega-1 OS=Homo sapiens OX=9606 GN=GSTO1 PE=1 SV=2	6.25	27851	12038.3	P78417	15	45.64	0	GSTO1_HUMAN	96649	93250.3	98180	89978	90104.3	93714.3	92220.3	98169	100693	113923	107848	112236	95819.3	95737	94587	77773	69675.3	64124	64986.7	65290.7	60974.3	91880.7	90440.7	90942.7	76270	82661	79830.7	81495.3	82045.3	83023	99711.3	101905	100387	102998	96902.7	97263.7	109454	106498	103755	82397	77459.3
Eukaryotic translation initiation factor 1A_ Y-chromosomal OS=Homo sapiens OX=9606 GN=EIF1AY PE=1 SV=4	4.88	16556.4	12020.6	O14602	5	32.64	0	IF1AY_HUMAN	28488.7	30126	33213.3	39255	47588	50852.3	37408	46194.7	49691.3	46467.7	46763	52331.7	33651	36014	52972	10453.3	9757.33	12682.3	12504.7	12907.7	15976.7	52880.7	78561	77211	64941.7	95408	92608	63629	93370.5	91050.5	88697.5	88801	88169.5	49733.3	55567	50145	50119	47585	45326	34240	34568
Tubulin beta-6 chain OS=Homo sapiens OX=9606 GN=TUBB6 PE=1 SV=1	4.58	50313.5	12004.4	Q9BUF5	14	44.62	0	TBB6_HUMAN				4751.8	5964.42	9223.37	5328.68	5242.91	8761.31	5468.13	6187.62	8297.97	3913.18	4530.7	7022.3				2079.58	2143.63	2195.08	5283.22	5406.63	5629.75	4539.17	4466.47	4755.12	5940.56	5888.12	5807.05	6912.47	6614.83	5936.7	4666.7	4291.34	4429.82				1152.04	1686.55
RNA-binding protein 8A OS=Homo sapiens OX=9606 GN=RBM8A PE=1 SV=1	5.38	19946.1	11961.5	Q9Y5S9	8	45.98	0	RBM8A_HUMAN	33518	31981	37742.3	28322.7	35124	32915	31329.7	37556.3	38077.7	32035	31575.7	39077.7	42572.7	42371	44255.7	35782	34842.3	37117.3	42635.3	43074	43280	30336.7	29366	29002.3	29886.7	20495	28610.3	30255	28600.3	27790.3	32384.7	33619.3	32375.3	34933.7	35062	33432.3	42193	38891.3	36639.7	37496	36185
Myosin-9 OS=Homo sapiens OX=9606 GN=MYH9 PE=1 SV=4	5.34	227787	11907.1	P35579	98	50.2	0	MYH9_HUMAN	12741.3	12123	11970.7	61187.3	61019.3	57887.7	59700.7	67159.7	68104.7	53043.7	57379	58227.7	14202.7	16096.3	18876.7	11834.3	11330.7	12365.7	13388.3	14310	15079.3	58889	61193.3	61022.7	52897.7	51814.7	55917.3	55781	53275.7	55257.7	36006.3	37687.3	36887	14163	14451.9	14727	20228.4	33586.7	37151.3	15407	18203.7
Pterin-4-alpha-carbinolamine dehydratase OS=Homo sapiens OX=9606 GN=PCBD1 PE=1 SV=2	6.37	12056.7	11907.1	P61457	6	50.96	0	PHS_HUMAN	38546	36430	36662.3	18029.7	19398	18494.7	19675.3	20714.3	21567.7	26028	27199.3	28829.3	33667.7	32240.3	36759.7	46970.3	44513	43195.7	44362.7	46940.3	49851	19673.7	19571	20564	20947.7	20282.3	20975.7	21663.3	23704.7	21725	30193.3	29770.7	29262	36587.7	36535.3	36963.3	54300	49703	42256	65562.7	58258.7
Proteasome activator complex subunit 1 OS=Homo sapiens OX=9606 GN=PSME1 PE=1 SV=1	5.69	28894.2	11891.4	Q06323	14	46.59	0	PSME1_HUMAN	17244	16667.3	17311.7	23780.3	22825	32635.3	25255.3	24602.3	34561.7	30394.3	27117.3	33716.7	17064.3	15849	21762.3	15735.3	14706.7	16113	18518	18811.7	20760.3	27515.3	25873.3	25000.3	25542	26067	24100.7	26635.7	25901.3	24231.3	29933.3	28650	28270.7	16451.7	16684.7	15634.7	17077.3	17070.7	15248.7	18510.3	17526.7
Phosphoserine aminotransferase OS=Homo sapiens OX=9606 GN=PSAT1 PE=1 SV=2	7.6	40821.9	11872.1	Q9Y617	15	39.19	0	SERC_HUMAN	66719.7	69725.3	70926.3	47196.3	50993	49399.3	49069.7	52333	45982.3	67322.7	64702.7	60609.7	52496.7	54142.3	50102	46147.7	39937	36872.7	19017.7	18455.7	17135	54778.3	55132	56734	48977.3	50005.7	50411.7	52738	53163.3	53144	74073.3	72090.3	73159	74478	74222	72029	54292	52861.3	50180	18547.3	18335
Heterogeneous nuclear ribonucleoprotein H OS=Homo sapiens OX=9606 GN=HNRNPH1 PE=1 SV=4	5.88	49514.7	11863.6	P31943	15	45.21	0	HNRH1_HUMAN	12907.1	13601.8	13433.6	50821.9	47511.3	58034.5	31576.6	28956.9	32613.1	23276.9	21775.5	24005.4	12848.5	12212.8	13617.2	11307.9	11163.9	9704.91	13419.7	14643.8	12422.3	53828.5	50630.2	48734.4	53979.6	51401.2	46821.7	38050	36517.4	33921.9	11533	10021.6	9092.8	8353.8	7500.95	6789.26	2815.38	3261.09	2719.83	2154.4	2592.93
Protein disulfide-isomerase A4 OS=Homo sapiens OX=9606 GN=PDIA4 PE=1 SV=2	4.77	73274.7	11827.1	P13667	38	62.02	0	PDIA4_HUMAN	59516.7	67584.3	68738	72912.7	74189	83928.3	71153	73958	79622.3	70757	72179	74301	73560	71219.3	72698	82831.7	79976.3	85118	87586.3	86438.7	96261.7	68585.7	68597	68569.7	68227.7	65780.7	62902.7	67237.3	69780.3	65776.3	54003	53589.3	53187.7	56484.7	55441.7	54167.3	66046	66785.7	59498.7	76454	71591.3
Plastin-3 OS=Homo sapiens OX=9606 GN=PLS3 PE=1 SV=4	5.27	71324.4	11825.9	P13797	33	50.63	0	PLST_HUMAN	34298.6	33711.7	33621.3	39757.7	42132.7	40154.3	38294.4	43690.8	40810	56955.3	53900.5	59136.3	33769.8	33433.3	37838.7	19623.2	20553.3	24160.4	22173	24306.7	23167.3	43078.5	39667.5	39121.1	40999.3	39631.7	35404.7	42378.3	42827.7	42513	55063	54489	56175.3	40990.6	42278.3	42878.3	16591	16498.7	15983	17599.3	17451.7
Protein canopy homolog 2 OS=Homo sapiens OX=9606 GN=CNPY2 PE=1 SV=1	4.62	20994.4	11799.6	Q9Y2B0	7	42.31	0	CNPY2_HUMAN	52640.7	53477	54545.7	26008	27836.3	27893.7	33075.3	24644.7	29106.7	44128	44954.3	37866	53607	49969	62828.7	64192.3	61754.7	72753.3	67804.3	69569.7	86490.3	28696	28288.3	26215	32943.7	31426.3	31353.3	34270	33620.7	31798.3	47680.3	59699	44116.3	63065.7	65241.7	62645	80730.3	77398.7	77545.7	89287	85264.3
Proliferation-associated protein 2G4 OS=Homo sapiens OX=9606 GN=PA2G4 PE=1 SV=3	6.14	44129.1	11775.1	Q9UQ80	20	55.58	0	PA2G4_HUMAN	20990.7	20457.3	20571	76983.3	85587.3	90928.3	73696.7	73069	80758	46141.7	44388	44135	19036.3	20015.3	19240.7	15271.3	14771.7	14918.7	19130.3	19528.3	23309	79100.7	79737.7	81920.7	82366.3	82934	82797.7	83182.3	77951.3	82995.3	33179	35354.3	34660.7	20795	21410.3	21068	17014.7	17568.7	16809.3	20547.3	20577.3
dCTP pyrophosphatase 1 OS=Homo sapiens OX=9606 GN=DCTPP1 PE=1 SV=1	4.74	18794.9	11762.5	Q9H773	10	47.65	0	DCTP1_HUMAN	31309.7	27894.7	28712.7	23686	21816	22370.3	23078.3	23324	20922.3	28671.3	25804	25651.3	28400.7	26191.3	26658	27817.7	27301.7	24774	28352.3	29789	26907.7	30196	28594.7	29679.7	31169.3	31433.7	29603.7	33943	31456.3	33112.7	43674.7	40720.3	41360.3	43124.3	41311.7	39141.7	55803.7	52332.3	46644	50220	48341
Acidic leucine-rich nuclear phosphoprotein 32 family member B OS=Homo sapiens OX=9606 GN=ANP32B PE=1 SV=1	3.73	28958.8	11742.6	Q92688	6	27.89	0	AN32B_HUMAN	52175.7	48977.2	54484.8	60005.4	63512.4	63768.1	64692.2	64514.9	60629.3	74447.6	63806.9	62781.6	43640.2	42969.3	39905.6	47204.6	43503.5	44558.4	43665.6	41023.9	40425.4	66015	64925.7	66238	59285.2	57910.2	61043.1	61173.2	61068.9	60166.3	68392.1	65211.7	67445.7	41815.2	39728.9	36574.9	17713	12256.2	8883.97	17673	14419.3
Heat shock protein HSP 90-alpha A2 OS=Homo sapiens OX=9606 GN=HSP90AA2P PE=1 SV=2	4.38	39478.9	11697.4	Q14568	12	36.15	0	HS902_HUMAN	7132.28	7333.14	7647.72	7401.74	8055.62	7590	27725.4	23669.6	20097.8	8164.74	8186.87	7372.9	56967.1	50781.5	46187	23897	21890.9	31508.8	3640.84	3969.9	4027.96	6719.73	6610.55	6660.07	13253	13259.4	12699.8	12923.2	12464	12405.4	12543.7	13411.4	13339.1	18888.8	18921.5	18907.3	9203.3	9241.63	9409.85	11768.8	11596.9
Keratin_ type II cytoskeletal 6A OS=Homo sapiens OX=9606 GN=KRT6A PE=1 SV=3	8.07	60330.2	11685.6	P02538	29	44.33	0	K2C6A_HUMAN	39653.4	40908.9	42838.9	13967.9	15058.8	13805.2	26087.1	24921.9	25936.9	40339.7	43915.8	42720.7	25355.5	22335.2	22297.9	67006.5	65037.9	69241.3	28036.8	27495.7	26343	16824	16311.6	15766.4	20986.9	20177.7	20392.5	26659.3	23059.4	17750.1	30704.6	29987.5	28926.7	37515.6	20774	26623.2	39023.7	39468.6	39336.7	30010.7	29305.7
Calcyclin-binding protein OS=Homo sapiens OX=9606 GN=CACYBP PE=1 SV=2	8.63	26324	11661.9	Q9HB71	13	57.46	0	CYBP_HUMAN	17498.3	16176.7	15913.7	38452.3	38707	46947	35884.7	37515	42754.7	38445	34956	43006	18625.7	17420	19205.3	11707	10954	12864.7	13340.3	12217	14222	62479	59065	57002.7	61915.3	54725	58948.7	62443	61470.7	59154.7	53769	52280	49827.7	33800.3	34259.7	32752.7	18554	18041.7	15914.3	16954.7	15633
Proteasome subunit beta type-1 OS=Homo sapiens OX=9606 GN=PSMB1 PE=1 SV=2	8.22	26717.5	11647.4	P20618	13	59.75	0	PSB1_HUMAN	71604	71169.3	68342.3	47494	44315.7	47611	45563	44217.3	46273.3	65455.7	61081.3	68137.3	60130.3	54973.7	62143.3	96484.3	87082.3	96054.7	95451	95431	108933	56791.7	56841.3	56110.7	51930	46354	52284	53031.3	58537	49861	75159.7	76958	73589.7	88817.7	85743.3	85055.7	111888	109146	108865	101753	102578
Hepatoma-derived growth factor OS=Homo sapiens OX=9606 GN=HDGF PE=1 SV=1	4.5	26902.4	11639.8	P51858	20	70	0	HDGF_HUMAN	47310.7	47993.3	47839	42566.7	42770.3	47538.3	42467.7	41611.7	45297.7	55583.3	49415.7	56989.3	52781.3	50657.7	56390.7	60453	50956	60014	64561.3	66268.3	75021.3	41655.3	42770.3	41617	51106.3	45707	47709.3	54379.3	50880.7	51765.3	60423	59033	57764.3	58076.7	57686.7	53487.3	53851	47390	45844.7	61799.3	64715
Small nuclear ribonucleoprotein G OS=Homo sapiens OX=9606 GN=SNRPG PE=1 SV=1	9.58	8553.13	11635.6	P62308	3	26.32	0	RUXG_HUMAN	29519	33063	32830	14450	17228	21670	18790.5	18207.5	23130	27091	23891.5	33427	36379	32344.5	46052	36146	32720.5	47129	41158	42018	59698	37321	37647	31033	36295	20067	31756	45186	42150	31164	58485	50529	39327	45467	22497	13580	10776	4169		14570	11461
Cyclin-dependent kinase 1 OS=Homo sapiens OX=9606 GN=CDK1 PE=1 SV=3	8.81	34152.5	11508.9	P06493	15	68.01	0	CDK1_HUMAN	9922	9018	9865.33	26888.7	30966.7	28472.3	19249	22009	19596	12811.7	11849.7	9657.33	7693	8665.67	9187.67	6964	8331.67	9239	9327.33	9864.33	10436	53292.7	49617.7	48851	50294.7	49527	49430.3	40600	39752.3	39413.3	11455.7	14515.3	15442.7	12777	15179	13487	10447.7	11845	11197.5	15419.3	18785.3
Phosphoglycerate mutase 2 OS=Homo sapiens OX=9606 GN=PGAM2 PE=1 SV=3	9.34	28937.3	11455.6	P15259	5	22.53	0	PGAM2_HUMAN																									3387.57	2068.88	3373.61
Proteasome subunit alpha type-6 OS=Homo sapiens OX=9606 GN=PSMA6 PE=1 SV=1	6.39	27855.7	11446.2	P60900	8	28.46	0	PSA6_HUMAN	91274.7	91663	97858	58790.7	65031	65265.7	53640.7	58550.7	53842	77355.3	72170.3	76603.3	71779.7	77583.3	70684.3	102375	94686.3	108944	105250	111694	118944	68279	66159.3	66531.7	63162.7	67101	62826.3	65760.3	66916.7	66785	86802.7	83698.7	87876.3	93392	94660.3	90918	115447	118679	114722	117259	118608
40S ribosomal protein S2 OS=Homo sapiens OX=9606 GN=RPS2 PE=1 SV=2	10.89	31609.6	11359.4	P15880	17	54.95	0	RS2_HUMAN	25800.3	23559.3	22853	48022.3	50054.3	52566.7	46806	44468.3	46142.7	35630.3	31974	33992	22476.3	21362	22074	11097.3	11063.3	10476	20047.3	19592.3	20288	47425	47476.7	47618	46590	42629.7	46394	42496	41625	38552	41637.3	39267.7	36575	29283.3	27613.3	26339	6734.67	6386.33	6515.67	21552	21074.3
Keratin_ type II cytoskeletal 6B OS=Homo sapiens OX=9606 GN=KRT6B PE=1 SV=5	8.07	60352.2	11308.3	P04259	29	44.33	0	K2C6B_HUMAN	37731.9	39774.7	40811.1	19225.7	20549.6	16675.4	26442.9	25795.7	26466.8	26705.3	28909.8	28372.4	31336.7	29099.7	29319.3	58770.9	54761.8	62504.8	19959.9	20437.8	21622.3	13779.9	12650.6	12128.9	14061.4	13509.3	13617.6	18997.7	16272.2	12691.1	19872.9	18459.6	18487.3	26332.4	16774.9	18725.7	33714.2	32915.5	31724.8	25027.4	23982.5
Puromycin-sensitive aminopeptidase OS=Homo sapiens OX=9606 GN=NPEPPS PE=1 SV=2	5.37	103961	11271.7	P55786	39	48.31	0	PSA_HUMAN	58010.3	60158.7	60425.3	49138	49564	49606.3	53387.7	51734.3	55196	67388.7	58663	63256	67201.7	60937.7	60644.7	64695	55518	55741.7	34076.3	32761.7	34012	45776.3	44813.3	45401.7	38926	43332	42552	42906.7	44397.7	43597	53322.7	56128	57616.3	50879.3	52954.3	53491.7	55975.7	53925	54929.3	26341.3	25305.7
Proteasome subunit beta type-2 OS=Homo sapiens OX=9606 GN=PSMB2 PE=1 SV=1	6.64	23007.4	11260.1	P49721	10	47.26	0	PSB2_HUMAN	56384	56037.7	52913	32962	34666.7	38449	31095	31688.7	36286	46745.7	43300.7	50486	44927.3	45913.7	45205.7	78044.3	71030.7	76856	77362.7	81928	92467.7	44993.3	46132.3	44798	42560.3	40736.3	41814.3	44037	41943	41628.3	60312.3	61028.7	61540	61222.7	60604.7	59591.3	96372.7	93053.3	89316.7	88862.7	81358.7
Prefoldin subunit 2 OS=Homo sapiens OX=9606 GN=PFDN2 PE=1 SV=1	6.23	16704.9	11232.1	Q9UHV9	8	57.14	0	PFD2_HUMAN	18329	18452	17603	21991.7	20898	23890	18546.7	18144.3	21337	22035.3	20184	23351	21721.7	21742.7	21641.3	16938.7	16635.7	18400.3	18889.3	17781	22037	25128	23286.3	23278.3	28213.7	28654.3	27102	28818	27870	25979.3	30083	29229.3	30196.7	30654.3	29824	30059	21124.3	20066.3	18788.3	21777.3	20544.7
Ras-related protein Rab-1B OS=Homo sapiens OX=9606 GN=RAB1B PE=1 SV=1	5.4	22342.3	11231.4	Q9H0U4	10	63.68	0	RAB1B_HUMAN	4639.26	5477.53	4592.94	12653.4	12570.9	12333.8	12042.8	12192.5	10982.9	11208.8	10607.5	9478.45	3598.87	4282.91	3241.08				1423.1	1457.46	1508.26	1686.92	1581.7	1677.96	10401.7	9995.29	10243.2	10291.6	10238.1	8861.33	26603.8	25588.2	24477	20134.3	19216.9	18519.1	2923.13	2842.27	2653.84	5765.61	5844.65
40S ribosomal protein S24 OS=Homo sapiens OX=9606 GN=RPS24 PE=1 SV=1	11.47	15423.2	11223.1	P62847	6	39.1	0	RS24_HUMAN		6982.5	5501	12889.3	12436.7	14513	11637.7	10975.3	11179.7	8796.67	8401.33	8373	6545	5627	6907	4156	3450	4965.5	8186.5	9213.5	8268.5	13640.5	13705.5	12877.5	12295	14243	16652.5	15556	15917.5	11072	12683.5	10606	11025.5	10513.5	9749.5	12107	4733	4152	3397	13520	10485
Histone-binding protein RBBP7 OS=Homo sapiens OX=9606 GN=RBBP7 PE=1 SV=1	4.72	48162.3	11216.8	Q16576	12	37.88	0	RBBP7_HUMAN	48346.4	46284.2	48166.1	67483.1	68086.2	77342.4	62276.3	62081.9	70036.5	71983.6	68703.6	74893.3	39452.8	40740.3	41605.7	22567	19493	22211.3	24480.2	23963.5	24368.2	73339.6	75008.6	77658.9	71825.6	70388.4	75098	65248.5	65345	68603.2	76896.8	79650.3	77475.2	63301	64723	63134.2	26005.2	22130.2	19061.8	22087.3	19682
Ras-related protein Rab-1A OS=Homo sapiens OX=9606 GN=RAB1A PE=1 SV=3	5.86	22905.9	11187.4	P62820	11	63.9	0	RAB1A_HUMAN	7265.61	7628.14	7095.38	14062.6	13573.6	13601	15039.5	14389.8	13780	16424.4	14884.7	13935.6	8653.32	9480.68	7969.03	3798.33	4285.33	3253.98	1587.06	1829.2	1766.39	21961.7	23040.2	22395.5	15273.4	14634.9	14996.6	16330	16255.2	14130.8	3865.05	3390.17	3123.98	4721.14	3997.45	3140.84	2923.13	2842.27	2653.84	5765.61	5844.65
Importin subunit alpha-1 OS=Homo sapiens OX=9606 GN=KPNA2 PE=1 SV=1	5.09	58204.2	11168	P52292	13	33.84	0	IMA1_HUMAN				25171.7	21741	26720.3	14705.3	15211.7	13523.7	5329.67	4884	5070.33	6490.33	6401	3846.5	2665		4740		3565	4240.33	49764.7	46869.3	44263.3	43665.7	39991.7	43587.7	30396.7	31485	28616.7	7524.67	7539	7248	6666	6629	6020.33	4461	4671.5	4569	4783	5797.5
40S ribosomal protein S9 OS=Homo sapiens OX=9606 GN=RPS9 PE=1 SV=3	11.3	22648.5	11143.2	P46781	12	46.91	0	RS9_HUMAN	21355.3	18632.3	19656.3	37320.7	37782.7	37403.7	29401.7	27342.7	31014.3	20885	20467.3	26629.3	17798.3	18629.3	19478.7	14005.3	12936.3	11137.7	20392.7	19998.7	18649.7	29914.7	28666.7	28756	29075	31074.7	30469.7	26201.7	28119.3	26988.3	27985.7	28391.7	29460.7	25458.3	25112	25741	7817.33	8233.67	8461.67	28175	26918.7
Putative heat shock protein HSP 90-alpha A5 OS=Homo sapiens OX=9606 GN=HSP90AA5P PE=2 SV=1	6.15	38966.2	11028.9	Q58FG0	11	28.44	0	HS905_HUMAN	23042.5	48920.2	24071.3	35183	25563	37480.3	18969	31075.6	18213.9	39215.9	19090.1	37745.2	47994	47498	44253.7	46007.6	18717.5	40635.4	19411.7	49683.9	50923.1	5840.32	5844.98	5865.72	5191.92	5593.24	5535.17	4743.59	4738.99	4935.2	6190.81	6332.89	6705.56	6948.67	7139	7091.67	8499.64	8795.01	8555.31	10281.8	10486.9
POTE ankyrin domain family member F OS=Homo sapiens OX=9606 GN=POTEF PE=1 SV=2	5.8	123099	10967.6	A5A3E0	24	23.81	0	POTEF_HUMAN	8218.63	8601.72	8943.86	3963.44	3675.2	4462.3	4843.02	3975.55	4608.39	6437.2	6713.38	7887.03	18389.9	15555.1	17112.9	7354.6	7266.26	8585.33	27820.8	28187.3	30009				6765.89	6804.89	6581.98	9242.6	9009.93	8296.64	14195.9	13770.5	13506.1	10855.7	10942.6	11011	6468.56	6417.19	6005.63	12392.4	11336.9
ATP synthase subunit alpha_ mitochondrial OS=Homo sapiens OX=9606 GN=ATP5F1A PE=1 SV=1	9.55	59864.8	10957.8	P25705	23	48.64	0	ATPA_HUMAN	76399	84359.7	92941.3	26472	25955.7	26304.7	27349	27430.7	25724.3	31535.3	31084	32472.7	86977.7	83203.7	87137.7	91141.3	82545.3	89639.3	64842	66695.7	70167.7	41434.7	42330.7	47965	39669.3	40818.7	39186.3	45004.7	43656.7	45697.7	60716.3	61221.7	61797.3	87984	83624.7	83094.3	117065	111302	113689	47986	49515.7
Putative heat shock protein HSP 90-beta 2 OS=Homo sapiens OX=9606 GN=HSP90AB2P PE=1 SV=2	4.59	44520.1	10948.7	Q58FF8	13	27.82	0	H90B2_HUMAN	11520.9	10813	10065.2	8343.02	7705.1	11355.8	9241.67	9263.83	10598.1	8594.15	8787.14	10019.8	7922.02	7577.67	7682.23	5563.02	5070.93	5738.44	8714.82	8779.75	9841.89	7246.88	7116.89	5388.02	10966.5	15991.5	11921.8	6179.79	6389.84	6063.83	8790.87	8596.92	8772.35	5289.26	5082.51	5838.09	3858.97	3767.22	3921.72	12492.6	13407.1
Annexin A2 OS=Homo sapiens OX=9606 GN=ANXA2 PE=1 SV=2	7.8	38832.2	10935.4	P07355	26	63.13	0	ANXA2_HUMAN	9518.8	8760.83	7983.49	61634.7	61748.3	55875	59563	57689	55925	62058.8	57589.5	62567.1	6972.1	7143.74	7393.72	8865.24	8058.19	8137.64	6973.34	7553.84	7475.6	42115.7	39471.3	37821.7	38866.7	35205.7	36631.3	38895	37841.7	38064.3	47429.7	47701	46981.3	17553.7	17939	17746.1	8626.89	7870.5	7800.5	35481	34921
Multifunctional protein ADE2 OS=Homo sapiens OX=9606 GN=PAICS PE=1 SV=3	6.99	47820.6	10905.6	P22234	21	39.29	0	PUR6_HUMAN	79392.7	80013	75082.3	59016.7	57200.3	58163	61174.3	57529	56486	75968.7	73024	86955.7	86743	87431.3	89680.3	93960	89405.3	94168	96151.7	97303	105573	63795.3	68631.7	67495	76275.3	71495.3	78682.7	82295.7	79616	82198.7	98441	106687	97379.3	102366	107738	105156	117611	114032	118529	119127	118458
Alpha-actinin-1 OS=Homo sapiens OX=9606 GN=ACTN1 PE=1 SV=2	5.11	103628	10887	P12814	48	60.65	0	ACTN1_HUMAN	49118.3	43145.7	45019	37755.3	36070	26854.4	39833.3	36739.3	25846.4	43886.7	44796	40231.1	53320.7	47544	39896.5	13306.6	12699.2	10515.1	12017.7	11119.7	7784.56	24112.9	24045.1	23184.6	21916.5	17199.3	20327.2	24139.2	23444.2	22972.5	33407.8	33035.2	30545.2	62847.7	63192	61037.3	100993	98822.5	91811.5	63763.1	59397.7
Putative heat shock protein HSP 90-beta 4 OS=Homo sapiens OX=9606 GN=HSP90AB4P PE=5 SV=1	4.45	58891.8	10864.2	Q58FF6	14	25.54	0	H90B4_HUMAN	13296.7	13800.5	13612.1	28041.3	34151.7	35085.6	29695	33320.6	30956.4	20223.6	19052	18060	13028.3	14201.4	13731.9	14738.4	14523.1	15434.9	18337.1	19183.4	19857.2	25382.9	25484.8	25463.7	41854	43844.8	42766.7	48761.2	49310.7	45763.8	21493	20402.3	21288.8	19573.4	18037.8	18974.8	24633.4	23050.2	23427	25289.5	26987.3
40S ribosomal protein S29 OS=Homo sapiens OX=9606 GN=RPS29 PE=1 SV=2	10.62	6904.89	10859.9	P62273	2	30.36	0	RS29_HUMAN				5131	6318.5	4958	7939	4766	3882	3014.5	3271.5	3253			1883							4509.33	4572.67	4469	4926.67	5225.33	4839.33	4530.67	4819.33	4738.33	4707.33	4840.33	5089.33	3566	5184	4149.5				7858	8498
Aspartate aminotransferase_ cytoplasmic OS=Homo sapiens OX=9606 GN=GOT1 PE=1 SV=3	6.6	46475.7	10843.9	P17174	25	66.83	0	AATC_HUMAN	67581.7	68457	69643.3	38836.3	37717.7	38007.7	39524	39246.3	39265.7	55102.7	52217	50098.3	63976.3	65687.3	64873	86764.7	83650.7	79204.3	87300.7	93935	92681	48350.7	46725	47502	46271	45721.3	46720.7	47609	47285.7	47698.3	62434	65588	65929	71254.3	73915.7	74347.3	101534	99725.7	100910	99203.7	99727.7
RuvB-like 2 OS=Homo sapiens OX=9606 GN=RUVBL2 PE=1 SV=3	5.34	51327.8	10659.1	Q9Y230	25	60.91	0	RUVB2_HUMAN	48904.7	46298.7	47002.7	42678.7	46541.3	41611.3	41315.7	44818.3	39710	51058.7	51341.7	44901	51333	52448.3	46542	22948	21523.7	14923.3	18651.3	22616.7	10438.7	40812.3	40148.3	39670.7	41845.7	43479.7	43411.7	40269.3	42281.3	40381	54448	50772.7	55756.7	47409	47432.3	46046.3	24900.3	25133	23298.3	13145.3	12584.7
Dermcidin OS=Homo sapiens OX=9606 GN=DCD PE=1 SV=2	6.14	11397.9	10641.4	P81605	6	40.91	0	DCD_HUMAN	22999.7	21373.3	21955.7	6095.33	6166.33	6570	5787.5	5238	5960	6939.33	6662.33	5054.67	11669	13951.7	10747	22182.7	20701.3	22434.3	12612.7	13154.7	13030	23693	13889.5	13638.5	15799.3	16407.3	17090.7	14878	16119.3	14879	20034	21991.3	22070	25023.7	25691.3	25911.7	25534.7	25447.7	25245.7	25805	25502
Transaldolase OS=Homo sapiens OX=9606 GN=TALDO1 PE=1 SV=2	6.41	37711.3	10626.2	P37837	18	58.16	0	TALDO_HUMAN	39563.7	37449.7	39152.7	57330	67907	69419	63607	67087.3	69532	58811.7	58317.3	63320.7	41796	39768	40065.7	36629	35762.7	32571.3	38158.3	36771.3	37292.7	58707.3	59839.7	61444.3	55119.7	57862	54751	59623.7	59061.3	58982.3	63320	64498.3	63497.3	46874	45934.7	46312.7	37171.3	37976.7	33791.7	32698.3	32242.7
Reticulocalbin-1 OS=Homo sapiens OX=9606 GN=RCN1 PE=1 SV=1	4.67	38890	10565.7	Q15293	21	75.83	0	RCN1_HUMAN	51564.3	49346.7	49514.3	38465.3	35551	37465	36157.7	35670.3	40372.7	47561	48657.3	50910	56990	57162.7	71201.7	67457	63456.7	72091.3	75324.7	85137	93029	40634	37093.3	33703.7	41693.7	37196.7	38649	40409.3	39321.3	39569.7	47873.3	47829.7	48677	56356.3	55990	56406.7	77039.7	78688.3	78314.7	99320.7	96755.3
Hypoxanthine-guanine phosphoribosyltransferase OS=Homo sapiens OX=9606 GN=HPRT1 PE=1 SV=2	6.27	24807.5	10546.3	P00492	10	53.67	0	HPRT_HUMAN	78822.7	91900.3	93483	57708	64254	62775	61064	64118.3	64431.7	79439	85303	79566.7	100063	99571	94130.7	98321.3	106982	108507	119720	122542	131279	67925	64572.3	65327.7	59656.3	55372	56422.7	60865	59815	59012.3	82260.7	79473.7	79955.7	91163.7	88907.3	84941.7	105554	95929	85684.7	103093	97416.3
Probable phosphoglycerate mutase 4 OS=Homo sapiens OX=9606 GN=PGAM4 PE=3 SV=1	6.23	28948	10543.2	Q8N0Y7	8	37.8	0	PGAM4_HUMAN	4771.39	8600.7	8297.42	6825.62	5808.84	6122.26	7572.94	6807.19	6883.24	10033.3	9043.94	9654.3	6590.96	6492.4	6132.14	5742.33	8038.02	6635.88	3281.7	4138.3	5299.89	5247.36	5175.71	4366.85	6184.36	4944.69	5352.98	6027.15	5392.52	4831.69	8215.57	7960.82	9531.08	6409.48	8350.68	7996.49
Importin subunit beta-1 OS=Homo sapiens OX=9606 GN=KPNB1 PE=1 SV=2	4.49	98482	10540	Q14974	23	29	0	IMB1_HUMAN	31386.3	32118.7	31607.3	109174	105770	99230.7	91040.3	90335.3	87571.7	60947	56596	53479.7	25052	22994.3	21884.3	20480	20509.3	21356.7	23632.7	24002.7	20995	105550	105762	95634	100311	98035.7	100600	90806.3	88926.3	82368	36205	36559	35839	28348	27708	27901.3	25831.7	25519.3	24365.3	29504	27793
X-ray repair cross-complementing protein 5 OS=Homo sapiens OX=9606 GN=XRCC5 PE=1 SV=3	5.45	83275	10516	P13010	31	53.83	0	XRCC5_HUMAN	27062.7	23758	24692	79375	79246	94151.3	61732	58936	76910.3	41063	40520.3	50517.3	29224	34764	43690.7	18406	15578.3	22337.3	21514.7	20717	29755.7	86378.7	81220.7	88342	86525	87841	89509.3	71592.3	68328.7	72810.7	32282	32310.3	32982.3	26062.3	27228.3	29023.3	18146.7	17487.7	17892.3	22742	23630.3
Putative heat shock 70 kDa protein 7 OS=Homo sapiens OX=9606 GN=HSPA7 PE=5 SV=2	7.87	40472.6	10415	P48741	8	23.16	0	HSP77_HUMAN	3546.9	3512.24	3826.12	2155.75	2402.88	2607.07	2863.87	2734.46	3781.99										3789.5	3777.72	5271.3							4134.18	4327.51	5079.67	16652.8	19344.4	31536
Glia maturation factor beta OS=Homo sapiens OX=9606 GN=GMFB PE=1 SV=2	5.01	16884.3	10372	P60983	7	36.62	0	GMFB_HUMAN	28235.3	26562	26485.7	15609	14566.3	17091	16434.7	15918.3	17056	21425	19612	24433.3	21494.3	22279	23729.3	32308.7	28344	33602	28014.3	26445.3	30098	15151.7	15718.3	15857.3	15266.7	15264.7	16199	16289.3	18155	16416.7	23727.7	23966	22530.7	26519	25072.3	22931	29069	27261.3	20352	24487	22889
Putative protein FAM10A4 OS=Homo sapiens OX=9606 GN=ST13P4 PE=5 SV=1	4.8	27577.9	10289.4	Q8IZP2	9	49.58	0	ST134_HUMAN				14303.8	15516.5	16544.1	16251.3	17088.9	18176.8	10003	9388.98	9620.09	8313.89	7923.59	8783.09	3716.64	3295.91	3678.03	5035.82	5365.55	5630.39	10158.4	10304.6	10479.5	9131.53	10142.6	8972.87	8377.92	8811.61	8639.33	9313.63	9128.67	9076.9	9111.98	9336.92	9220.22				4739.21	4624.34
Ubiquitin-conjugating enzyme E2 N OS=Homo sapiens OX=9606 GN=UBE2N PE=1 SV=1	6.18	17194.9	10271.9	P61088	7	51.97	0	UBE2N_HUMAN	17075.7	16126	15598.7	29033	28514.7	46415	26698	25043.3	46073	29291	28684.7	46307.3	15222.3	15156.3	32189	14985.3	13472.3	21890	11147.3	11126	18722.3	45845.7	47933.7	48360.3	47727.3	43785.3	45803	50354	48503	46227.3	47183.7	47969	48439.7	32521.3	35732.3	34276	34364.7	31972.3	30825.3	24583.7	23113.3
Synapse-associated protein 1 OS=Homo sapiens OX=9606 GN=SYAP1 PE=1 SV=1	4.25	39990.5	10257.8	Q96A49	21	46.88	0	SYAP1_HUMAN	15686	15692.7	14544.7	21704.3	19711.7	22069.3	24455.7	24464.3	28039.3	22078.3	21564.3	25019.3	15929.3	16205.3	17250.3	10878.7	11218	11611.3	12355.3	13086.3	12385	40433.3	40046.3	37427	37177.7	37072.7	37017.7	41185.7	40621	39590.7	48043.3	45620.7	45880.7	29624.7	29060.7	28213.7	27099.3	26831.3	25256	28527	25580.7
Adenylate kinase 2_ mitochondrial OS=Homo sapiens OX=9606 GN=AK2 PE=1 SV=2	7.85	26705.9	10197.1	P54819	18	66.95	0	KAD2_HUMAN	35498.3	37474.7	34826	31149.3	30665	30085	29669.7	28992.7	24243	40347.7	42020.7	35572	31960	33465	31027	24690.3	23316.7	19594.3	15486.3	14346.3	13118	42825.7	44144.7	43086.7	45900.7	39739.7	43303	45957.3	44145.7	43479.7	56968	58200	50973.3	50570	53891.7	53443.7	26887	24165.7	21324.3	12269	11952.7
40S ribosomal protein S3a OS=Homo sapiens OX=9606 GN=RPS3A PE=1 SV=2	10.43	30173.1	10170.9	P61247	17	51.14	0	RS3A_HUMAN	19107.7	18796	19276.7	42960.3	42937	35180.3	38259.3	38213	28201	24991.7	25995.3	21673.3	20420	17093.3	15052.7	9426	8747.67	5148.67	19356	19850	18214	24256	24916.7	26039.7	31593.7	28100	33284	29981.3	31389.7	31378.7	32341.7	32994.7	35121	18826.3	20477.7	19155.3	6584.5	6787.5	7167.5	20352.3	19483.7
Peroxiredoxin-5_ mitochondrial OS=Homo sapiens OX=9606 GN=PRDX5 PE=1 SV=4	8.98	22314.6	10134.5	P30044	9	47.2	0	PRDX5_HUMAN	58655.3	54339	57197.3	33913.3	36783.3	33823.7	35759.3	37362	32206.7	47777	49115	39397.3	52465.3	51328	47999.7	30463.7	29398.3	27505	20778.3	20818.3	19636.3	22703.3	22481	21988.7	22829.7	24256.7	24024.7	26613	25173.7	27259.3	36757.3	32860.3	38008	41689.7	39357.7	40118.3	25101.7	23220.3	21368.7	17960.3	16621.3
Nucleolin OS=Homo sapiens OX=9606 GN=NCL PE=1 SV=3	4.4	76671.5	10118.5	P19338	26	34.79	0	NUCL_HUMAN	97358	94991	101975	129782	120591	130522	129373	122192	138369	112497	113203	120403	102197	104534	107325	91569	86241.7	93429	112970	114607	131924	81292.7	77267	78830.7	100753	103300	105883	98916.7	98138.7	102672	103897	109943	105241	80292	85739.3	84712	77117	75907	77687	93441.7	95941
Calbindin OS=Homo sapiens OX=9606 GN=CALB1 PE=1 SV=2	4.51	30310.3	10060.2	P05937	14	55.17	0	CALB1_HUMAN	84183.7	84063.2	84003.2	75214.2	67606.7	75728.5	79334.6	72187.3	79141	90397.1	79164.7	98266.3	82272.3	81431.9	87681.4	89204.3	92815.4	98488.5	100932	106502	103915	67711.2	70795.5	73033.3	71028.8	79022.7	78486.5	78496.2	78690.4	77783	92718.2	95242.1	95455.2	90790.8	87024.1	89125.3	94839.3	99719.3	97788.7	104300	100942
ATP-dependent RNA helicase DDX39A OS=Homo sapiens OX=9606 GN=DDX39A PE=1 SV=2	5.34	49642.9	10054.4	O00148	18	38.17	0	DX39A_HUMAN	29337	30313.7	25012.3	28783.5	28600.2	29685.8	21572.5	21721.6	22047.1	17181.4	17385.8	16772.8	15575.4	13908.1	14260.2	35313.7	15246.2	32324.2	18272.5	19335.7	21641.6	47580.6	48537.7	46823.9	39243	36975.9	39444.1	30697.1	29140.3	31605.1	38658.1	41576.4	39332.4	43094.4	39092	40534.6	27636	28186.3	27123.3	26949.7	29191
Carbonyl reductase [NADPH] 3 OS=Homo sapiens OX=9606 GN=CBR3 PE=1 SV=3	5.78	31249.5	10051.5	O75828	10	48.38	0	CBR3_HUMAN	9420.3	9961.61	9796.76	6583.25	6712.97	8002.47	7129.87	7792.58	7999.53	9563.7	8728.52	8788.22	8711.39	8537.05	7835.38	3227.57	3752.47	4703.32	6609.79	6990.77	15554.7	6859	6807.1	6259.64	6012.49	5682.42	5857.6	7126.69	6851.59	5877.66	6190.99	5882.13	5441.85	4809.89	5306.57	4779.67	3833.67	3104.95	3044.15	3487.76	3733.88
Acetyl-CoA acetyltransferase_ mitochondrial OS=Homo sapiens OX=9606 GN=ACAT1 PE=1 SV=1	9.21	45484.8	10035.7	P24752	17	46.6	0	THIL_HUMAN	10533.3	11371.3	11220.7	37451.7	36089.3	44519.3	35880	35064.7	41732	41856.3	41202	49671.7	9585.67	10397.7	10622	6839	9749	3096.33	11532	12746		33469.7	34551	32792.7	29975.3	28724	30555.7	30696.3	29189.7	27820	32884	30330.7	30220	10370.7	10692.3	10294.7	3426.5	3316.5	2906.33		3158.5
Tubulin-folding cofactor B OS=Homo sapiens OX=9606 GN=TBCB PE=1 SV=2	4.87	27610.7	10002.4	Q99426	9	40.16	0	TBCB_HUMAN	28221.7	27062.7	26857	67167	60952.3	72373.3	64481.3	60354.7	75291.7	43290	42888.3	55321.7	28387.3	30151	37203.7	18677.7	19747.3	24543.3	20237.7	20055.7	24215.3	64505	67782.3	66716.7	67858.3	68080	68906.7	66423.7	68824.3	67159.7	39292.7	43956.3	41142.3	33722	33448.3	33506.3	22882	22918.3	21960	16559.3	15383.7
Cytosolic acyl coenzyme A thioester hydrolase OS=Homo sapiens OX=9606 GN=ACOT7 PE=1 SV=3	8.55	42480.4	9827.97	O00154	13	42.11	0	BACH_HUMAN	53853.3	65651.3	64543.7	50776	50836	49580.7	48559.3	49059.7	45882.7	63911	59771.3	59283	62831.7	59998.7	59398.7	73223	68993.3	61873.3	49297.7	49296.7	48071.3	57972	55673.3	52400.3	54344	43300.7	49568.3	55200.7	53599.3	49579	69528.7	66778.7	64979.7	75202	71965.7	70033	55884.7	45877.7	34675	10030.3	10194
Annexin A6 OS=Homo sapiens OX=9606 GN=ANXA6 PE=1 SV=3	5.27	76215.6	9815.18	P08133	46	64.34	0	ANXA6_HUMAN	9100	10524.7	8976.33	51273.7	58937	53868.3	45491.3	58606.7	53317.3	34761.3	37589.7	35657.7	12958.3	14680	19383.7	9081.67	8690	12173	10584	9582.67	13045	34844.3	34803.3	31796.7	34779	33170.7	30960	33000.7	32644.3	28745.7	14192.3	12944.3	14410.7	9963.67	9867.33	10139.3	8752.67	8968	8192	9667	9400
Proteasome activator complex subunit 3 OS=Homo sapiens OX=9606 GN=PSME3 PE=1 SV=1	5.6	29620.2	9798.98	P61289	16	64.57	0	PSME3_HUMAN	53817.3	53100.7	54808	33695	33428.7	37304.7	34883	35772.3	39030	53541.3	50620.7	51937.3	65382	62869.7	58009.7	72503	70916.3	76258	76686.3	77331.7	85241	40070	40833.3	39972.7	39716	38949.3	39830.7	40096.7	40386.7	39331	58196.7	56780.7	57015.7	60290.7	57061	55240.3	70789.3	68682.7	62738	65456.3	64896
Serum albumin OS=Homo sapiens OX=9606 GN=ALB PE=1 SV=2	5.89	71362.7	9778.73	P02768	19	29.89	0	ALBU_HUMAN	127202	203955	101386	194727	134880	212513	194617	169454	153543	215555	87537	218801	85572	175680	125292	146300	140603	203383	130678	124166	231367	62517.7	58321	57431	86881.7	85014.7	81742.3	160931	158769	166675	77241.3	72162.7	78365	47348.3	80859.3	75770	109169	109276	110490	121110	123776
Nucleosome assembly protein 1-like 1 OS=Homo sapiens OX=9606 GN=NAP1L1 PE=1 SV=1	4.16	45659.3	9774.24	P55209	9	24.04	0	NP1L1_HUMAN	32464.8	39672.8	39732.6	105163	105010	99716.7	111843	105933	102998	87645.4	79302.5	71442	39158.5	35268.1	28871.7	28688.9	30435	27603	41216.3	43505.8	32528.7	101954	105735	108951	110755	106711	110942	108639	104083	101241	69888.3	69323.7	60592	31548	29515	23501.3	35235	29293	31898	16707.1	30332
Keratin_ type II cytoskeletal 8 OS=Homo sapiens OX=9606 GN=KRT8 PE=1 SV=7	5.34	53704.4	9715.05	P05787	23	43.89	0	K2C8_HUMAN	37412.7	42630.7	38690.7	45347	40972	45633.3	49579	45719.7	51771	50185.3	45940.3	45221.7	37687	35865.7	35690	34459.3	39355.3	38605.3	41362.3	43299	40777	22086.3	23244	23441	22939.7	20155.3	25509.7	23631.7	23795.7	24237.7	17405	16116.7	15122.7	8699.54	8249	8504.67	7782	7461.67	7577.67	14359.7	13823
Septin-2 OS=Homo sapiens OX=9606 GN=SEPTIN2 PE=1 SV=1	6.17	41715.7	9693.81	Q15019	17	58.45	0	SEPT2_HUMAN	37173.7	40718	40795	30402.3	33212.3	30332.7	27850	33803.3	34530.3	38852	43218.3	42151.3	44437.7	44372	48443	40063.3	40503.7	31537.3	23248.3	25479.7	24692.3	30531.7	28432	28960.3	28260.3	27286.3	28344	28298.3	27900	29624.7	40934	42603.7	42781.7	42051	43789.3	42628	36446	35791.7	44085	19120.7	18503
Putative beta-actin-like protein 3 OS=Homo sapiens OX=9606 GN=POTEKP PE=5 SV=1	5.92	42358.5	9613.61	Q9BYX7	9	33.33	0	ACTBM_HUMAN	5337.44	7622.85	7647.68	4806.67	4550.69	5838.86	6095.54	6285.27	7296.39	5154.97	5239.34	8702.62	14040.7	12677.4	16424.9	8736.07	8625.65	12786.1	7637.29	9160	12994.1	2562.72	2795.77	2695.39	2943.57	2790.44	2890.8	4098.92	4231.97	3886.2	5221.66	5221.97	5164.83	4185.82	4256.08	4171.78	1932.91	1555.15	1609.07	5512.89	5043.45
Serine hydroxymethyltransferase_ mitochondrial OS=Homo sapiens OX=9606 GN=SHMT2 PE=1 SV=3	8.59	56449.3	9607.75	P34897	24	52.78	0	GLYM_HUMAN	74772	83469.3	80376	47461.7	45753.7	46694.7	44701.7	42926.7	44440	58445	59034.3	64477.3	64730	64449.7	74002.7	74915	74530.3	75954.7	45660	51412	52615.3	63233.7	62532.3	55414.3	63592.3	52864	58119.3	65206.7	61795	56277.3	90408.3	89029.3	89575.3	94930.3	90690	92941.7	114218	111462	109289	48444.7	48437.7
D-3-phosphoglycerate dehydrogenase OS=Homo sapiens OX=9606 GN=PHGDH PE=1 SV=4	6.31	57392	9580.04	O43175	19	36.96	0	SERA_HUMAN	123601	114954	118739	111115	107091	124567	112026	105244	120415	100794	116527	132654	98538.3	82683.3	120006	49049.7	11344.3	67188	51271	11334.3	80830	128790	128080	126360	114587	112973	116721	110813	108567	114478	125923	131951	128868	110688	130576	133233	107199	105938	105777	97174.3	97460.3
Prefoldin subunit 4 OS=Homo sapiens OX=9606 GN=PFDN4 PE=1 SV=1	4.22	15428.3	9566.73	Q9NQP4	4	37.31	0	PFD4_HUMAN	19495.7	32797.3	30642.7	16971.7	18323	18560	20014	20539.3	19983	27555.7	28352.3	30082.3	38251	36483.3	40348.3	29845.3	39001.7	37599.7	37762	39442.3	39118	15192.7	14905.3	13759.3	14348.7	12699	14176.7	17257	16721.3	15130	21601	21949.3	20550	24087.7	21943.3	19517.7	10582	9249.33	8962.67	6543	5406.67
Putative Ras-related protein Rab-1C OS=Homo sapiens OX=9606 GN=RAB1C PE=5 SV=2	5.08	22245.1	9538.46	Q92928	6	40.3	0	RAB1C_HUMAN	9462.7	6053.48	5887.77	3939.27	2897.77	4047.52	4747.4	5066.28	5236.78	5063	4355.64	5169.98	7326.8	6796.47	7171.56	16768.1	18732.2	18731.6	7367.84	7193	6782.09	3671.76	3668.42	3768.56	4087.72	3974.1	4037.75	3507.81	3424.73	2996.92	2536.7	2101.44	2539.69	4800.18	4453.68	3836.47	4756.24	4630.45	3816.33	6552.58	6223.4
Proteasome subunit alpha type-3 OS=Homo sapiens OX=9606 GN=PSMA3 PE=1 SV=2	5.02	28661.4	9530.52	P25788	17	51.37	0	PSA3_HUMAN	71895	70795	74513.3	45459.7	43982	43824.7	41671.7	47084.7	49099	60506.3	60620	58259	65210.3	67317.3	63845.3	91680.7	88030.3	89251.7	90277.3	96887.7	101128	50009.3	51714.7	53991.3	54953	55549	52494	52965.7	56738	57776	72546	72362	74219	81986.7	80385.7	80958.7	117068	115372	110071	116577	113344
Histone-binding protein RBBP4 OS=Homo sapiens OX=9606 GN=RBBP4 PE=1 SV=3	4.56	47940.9	9510.53	Q09028	14	40	0	RBBP4_HUMAN	37988.6	35776.5	37846.9	23738.2	23870.2	25954.4	24670.2	24217	25275.7	33420.1	29802.5	32724.1	35797.2	36883.6	37785.6	26917.7	22517.6	24481.9	17481	17412.7	17301.4	36861.8	38818.5	40271.8	38874.9	39547.6	41312.5	45498.4	45652.5	48449	56997.5	56906.1	58387.1	57729	58471.3	56621.1	30456.5	24986.2	24172.6	21177.7	17415.3
Protein-L-isoaspartate(D-aspartate) O-methyltransferase OS=Homo sapiens OX=9606 GN=PCMT1 PE=1 SV=4	6.85	24807.5	9471.09	P22061	8	48.46	0	PIMT_HUMAN	18059	15653.7	14802	34623.7	36972.3	31803	29257.3	29205.3	24703	40241	41585	35574.7	9777.33	10253.7	9448	6942.5	6101.67	5614.33	7546.67	7436.33	6322.67	34112.7	33870.7	34888	35931.7	34949.7	35357.3	36807.7	36838	34351.7	39829.3	37838	36810.7	24098.7	23994.7	22972.3	9503.5	9272.5	9529.5	9453	9119.5
Ras-related protein Rab-5C OS=Homo sapiens OX=9606 GN=RAB5C PE=1 SV=2	8.58	23710.7	9418.95	P51148	12	68.06	0	RAB5C_HUMAN	27993.6	23948.1	25251.5	22278.7	23037.5	24793.4	26041.2	24671.9	27168.5	32559.5	31965.3	33164.3	24128.2	23738.7	25228	7903.67	6044	6892	7091.33	7428.33	7967.33	27787.5	27763.1	28749.7	25754.1	23843.6	24023.2	25867.9	25540.2	25378.9	38412.3	37363.4	35186.4	31573.7	31963.5	30995	10148	9631.33	9231.67	12321.7	11272
Delta(3_5)-Delta(2_4)-dienoyl-CoA isomerase_ mitochondrial OS=Homo sapiens OX=9606 GN=ECH1 PE=1 SV=2	8	36158.4	9412.65	Q13011	14	60.98	0	ECH1_HUMAN	9079.33	9101.67	8664	26856	32255.7	27309.7	25584	31434	24250.3	40207.3	40208	34734	8316.33	9118.33	9262.67		4630	4639		4035	4213	35003.7	36806.3	34776.3	35640.3	26987.7	33279	37917.7	38405.7	35829.3	50563.3	50496.3	45945.3	26190.7	25951.7	24235	3239	3438		4684	3993
Rab GDP dissociation inhibitor alpha OS=Homo sapiens OX=9606 GN=GDI1 PE=1 SV=2	4.81	51210.1	9400.27	P31150	21	55.03	0	GDIA_HUMAN	12897.1	12994.6	13355.3	20892.7	20291.3	22475	20032.4	19582.8	21794.4	26057	24829.6	29212.3	10241	9033.67	10462	3117.62	3173.7	3960.93	4083.19	3972.22	4549.39	23916.5	24058.4	23838.4	24619.3	20745.7	23217.4	28285.2	28021.3	26465	36890.5	34178.4	32353.7	20745.5	19524.4	17875.5	6801.95	5910.1	5534.42	6723.19	6072.28
Transcription factor BTF3 OS=Homo sapiens OX=9606 GN=BTF3 PE=1 SV=1	10.16	22225	9364.79	P20290	10	67.96	0	BTF3_HUMAN	6587	13118.7	11689.7	18852.7	18965.3	21746.3	15751.7	15932	16654.7	18248.3	20749.3	20800	18693.3	19708.7	19964.7	12352	17710	18417	15742.7	22366.7	21801.7	17892.7	15496.7	16200.7	23674.3	22024.7	22691.3	25293.3	23708.3	19050.3	17739.7	16822.7	17100.3	12464.3	12527.7	10844.7	16913	19474	22801	18051.5	20394
Proteasome subunit beta type-4 OS=Homo sapiens OX=9606 GN=PSMB4 PE=1 SV=4	5.62	29261.4	9354.21	P28070	9	48.86	0	PSB4_HUMAN	77389.3	73690	74605.7	50610	50283.7	46024.7	49816.3	53443.3	45973	67340.7	63098.3	58005.3	69924	67324.3	65028	93385	85626.3	90247.7	91469.7	89074.7	95304.3	49881.7	51378.3	52700	48497	49477.3	50146	51786	51549.7	53721	70978	72816.3	71573.3	80030.3	79939.7	79161.3	115312	114478	111434	120138	113812
40S ribosomal protein S15a OS=Homo sapiens OX=9606 GN=RPS15A PE=1 SV=2	10.88	14953.6	9312.78	P62244	10	64.62	0	RS15A_HUMAN	9399.33	9117.33	9560	20771.3	21620.3	18418.3	17537.7	20258.7	14538	15771.3	15054.7	13720.3	8486.67	8907.67	7983.33	6409.67	6937.33	6726.67	11873.7	12484.7	10247.3	13380.3	13699.3	12893	14214	9845	12742.7	13108.7	12218	11719.7	13588.3	13070.3	12310.3	11662.3	11012.7	10481.3	8022.33	7806	7684.33	22796.3	21032.7
Keratin_ type I cytoskeletal 19 OS=Homo sapiens OX=9606 GN=KRT19 PE=1 SV=4	4.86	44106.1	9303.28	P08727	31	77.25	0	K1C19_HUMAN	29037.6	28723.9	29940.9	29257.6	30796.8	31324.5	31372.7	31695.7	36262	32180.7	31364.7	32433.5	23211	24552.8	24620.1	24229.3	27425.3	38154.7	32450.2	32876.3	32001.4	9676.27	10084.1	9906.33	10636.3	11138.6	10931	9191.12	9270.2	9677.31	7903.05	7889.4	8031.85	6074.41	7695.33	9603.37	8346.02	9717.84	10505.4	9667.27	9669.57
Diablo homolog_ mitochondrial OS=Homo sapiens OX=9606 GN=DIABLO PE=1 SV=1	5.59	27359	9289.29	Q9NR28	12	53.14	0	DBLOH_HUMAN	44265.3	42468.3	42724.3	25513.3	23514	25092	25225.7	25220.7	26756	33888.7	34463.3	34905.3	40022	37205.7	42135.7	50324	48217.7	43671.3	46169.7	49585.7	46260.3	19211.3	18125.3	18386.3	16033.3	16350.7	16883.3	17311	17701.7	16564.3	30541.7	27442.3	29865.3	32010	32908.3	33979	48674.3	47560	45741	38166.7	35847.7
ATP-dependent 6-phosphofructokinase_ platelet type OS=Homo sapiens OX=9606 GN=PFKP PE=1 SV=2	7.37	86508.7	9266.63	Q01813	31	38.78	0	PFKAP_HUMAN	81925.7	83140	83511.7	75753.7	75303.7	58176	75081	77367	74186	92985	91141.7	81696.3	95587	93966.3	85078.3	80776.3	79352.3	73572.3	50887.7	51821	47468.7	49142.8	50265.6	48881.1	46074.6	45669.7	46918	48915.4	50693.8	51620	65340	65008	64808	67216.7	70059.3	67935	64924.7	65815	64630	34951	36981.7
Dynactin subunit 2 OS=Homo sapiens OX=9606 GN=DCTN2 PE=1 SV=4	4.93	44345.1	9252.41	Q13561	16	48.38	0	DCTN2_HUMAN	12002.7	11175.3	11202.3	24007	24013	22511	24783	24656	22854	15586.3	15528.7	14541.7	12104.3	10983.3	10640	12231.7	12037	11590.3	14571	15918.7	14535.3	22834.7	22311.3	22222.3	24572.7	24755.3	23211.3	24919.7	25882.3	25521.3	14993	15058.7	14846.7	13068.7	12543.7	12964.3	18597.7	18172	17976.3	22530.7	22112
26S proteasome regulatory subunit 8 OS=Homo sapiens OX=9606 GN=PSMC5 PE=1 SV=1	7.41	45797.2	9241.88	P62195	18	48.03	0	PRS8_HUMAN	7160	7665	7688.67	32942	29169.3	37777	26318.7	27223	36558	17132	15501	22103.7	10546.7	9474.33	14523	3474.67	4144.33	6686	5043.67	4621	9241.33	31790.3	33269	27449.3	34555.3	32170	32550	29074.3	29341	28598.3	17663.7	19193	18417	12600.3	13050.3	11765.7	7426.67	7462	6370.33	7675.67	7663.33
S-phase kinase-associated protein 1 OS=Homo sapiens OX=9606 GN=SKP1 PE=1 SV=2	4.2	18829.1	9237.58	P63208	9	57.06	0	SKP1_HUMAN	39537.3	41771.7	38322	20943.3	23472	27129.7	37638.5	25302	29716.3	47824	31512.3	41608	40789.3	42043.7	51955	45845.7	38676	49492.7	44310	43287.7	51345	34382.7	28979.7	31360.7	30372	26376	39664	33687.3	32089.7	30414	52262.3	47459.7	38698.3	47878.3	47033.3	40319.3	49360.3	46303.3	43838.3	55162.5	35407.7
Superoxide dismutase [Mn]_ mitochondrial OS=Homo sapiens OX=9606 GN=SOD2 PE=1 SV=3	8.41	24921.3	9222.39	P04179	12	62.61	0	SODM_HUMAN	25147.7	24833	25158.3	48854	51360.7	56163	41244	41181	40447.3	42654.3	48611.7	53105.7	28627	29974	32367.3	29383	31136	22675.7	35255.7	36403	43709.7	26091	27036.7	22795	56262.7	27925.3	48667.3	50565	49133.7	34761	22239.3	22836.3	22570	16924.3	16720.3	15650.3	41511.7	43272	43696.3	42286.3	44861.7
Glucosidase 2 subunit beta OS=Homo sapiens OX=9606 GN=PRKCSH PE=1 SV=2	4.13	60395	9200.37	P14314	18	31.63	0	GLU2B_HUMAN	109360	106898	114386	98095	95781.3	107228	103096	98050.7	108732	113650	106464	123546	116753	118187	127342	119693	110007	126918	129819	123953	147784	89184	90030.3	88679	90118	82918.7	89207.7	92540.3	94901.7	92673	103648	109002	106529	107219	109977	108107	128821	122069	119455	139463	133689
Low molecular weight phosphotyrosine protein phosphatase OS=Homo sapiens OX=9606 GN=ACP1 PE=1 SV=3	6.37	18498.7	9183.08	P24666	6	42.41	0	PPAC_HUMAN	17666.7	16321.3	16273	50286.7	51417.7	43262.3	45920.3	45707.3	38043	30079	28397.3	25125.7	13671.3	13607.7	9995.33	11096.3	10108.3	9697.33	12874.7	12606	10253.7	36889.7	37574	38742.3	40049.3	42837	43357	42645	43549.3	42618.3	25566.3	24900.7	24591.7	17703.3	17788.7	17263.3	13194.7	14217.7	12663.3	17699.7	16593.7
Calumenin OS=Homo sapiens OX=9606 GN=CALU PE=1 SV=2	4.28	37220.9	9176.72	O43852	27	70.79	0	CALU_HUMAN	43565	48940	47262	32339.7	31203	33011	32926.7	30949	29341.3	39999	39790.3	40855	55302.7	51316.7	50096	68495.3	61008.7	56980	76269.3	73722	72536.7	36203	34906.3	34102.3	37157.3	26559	32475.7	38226	36092	34510	46718.3	46410.7	39566	51153	52529.3	44067	70431	71305	62636.7	93146	94022.3
Bifunctional purine biosynthesis protein PURH OS=Homo sapiens OX=9606 GN=ATIC PE=1 SV=3	6.3	65129.2	9176.27	P31939	31	54.73	0	PUR9_HUMAN	4634.33	3564	4178	41714.7	41916	44208.3	37922	38294.7	38623.3	19335.3	19235.7	19112.7	4067.67	4587.67	5914.33	8219	118063	15690			3124	48438.7	49361.7	51018.7	42170.7	44433.7	44113	42716.3	43466.7	43135.3	29025.3	27665.7	29044.3	30206.7	29113	31521	50137	49014.3	48489.3	22232.3	20561
Adenylyl cyclase-associated protein 1 OS=Homo sapiens OX=9606 GN=CAP1 PE=1 SV=5	8.07	52357.8	9122.89	Q01518	20	45.68	0	CAP1_HUMAN	13311.7	13269.7	13148	50048	49485	53700.7	51180	50630.3	52691.3	59637.7	53666.3	60319.7	14208.7	12906.3	13835.3	6282	6315.67	7306.67	7405.67	7363	8135	60228.3	62347.7	58447.3	50336.7	51457	54006.3	53241	57174	54268.3	68176.3	66632.7	73392.7	22856.7	22013	22857.3	8671.33	8404.33	8196.67	8973	8641.67
Keratin_ type I cytoskeletal 17 OS=Homo sapiens OX=9606 GN=KRT17 PE=1 SV=2	4.78	48390.9	9091.3	Q04695	30	63.89	0	K1C17_HUMAN	17876.6	13995.5	16545	21724.5	21527	22673.4	20870.9	20938.1	20319	18076.8	18309.8	18803.4	15797.9	15751.2	19364	32813.6	31937.8	34077.2	8054.15	7840.95	8652.02	20549.7	22467	22455.5	18810.7	17596.3	19049	20435.7	21245	19098	21133.3	21469.4	22181.8	26678.2	27224	27102.6	15312.3	15964.5	15159.3	19112.9	19185.1
40S ribosomal protein S18 OS=Homo sapiens OX=9606 GN=RPS18 PE=1 SV=3	11.59	17718.7	9084.79	P62269	9	48.68	0	RS18_HUMAN	13747	13484.7	13342	41199.3	42804	44317	32699	30918.7	32571	20845.7	19197	20810.3	12227.3	11306	18951	5001.67	5021.67	6900.33	13481	13386	11939	36770	37068.7	35950.7	40684	39308.7	39051.3	33677.3	34038.7	32613	34996	31334	34114.3	22838.7	20987.7	22572.7	4530	5095	4959	11499.7	11685.7
14-3-3 protein sigma OS=Homo sapiens OX=9606 GN=SFN PE=1 SV=1	4.48	27888.2	9082.48	P31947	10	37.1	0	1433S_HUMAN	9894.48	9180.17	9810.88	4264.33	4033.67	3888	5143	4633.01	3286.07	7636.67	7675.67	5593.45	13734.6	12972.5	10290.2	11714.1	10292.1	8397.71	12258.5	10663.2	10271.2	2611.85	2706.07	2620.5	2651.29	3807.06	2619.24	2947.29	3369.94	3238.67	5055.08	4972.5	4770.33	6573.91	6696.41	7419.48	6551.67	7480.07	7009.27	7999.33	7563.33
Keratin_ type I cuticular Ha3-II OS=Homo sapiens OX=9606 GN=KRT33B PE=1 SV=3	4.61	47354.2	9075.55	Q14525	18	39.36	0	KT33B_HUMAN				7057.28	5203.91	8370.69	6873.63	6836.89	7173.37	7347	9953	8378.33										8781.2	9382.61	9408	8558.21	7968.87	5655.92	11620.5	9418.16	9342.09	7439.29	7264.17	7004.24	4321.02	4211	4181.19	1286.72	1867.85	1421.75
Heterogeneous nuclear ribonucleoprotein U OS=Homo sapiens OX=9606 GN=HNRNPU PE=1 SV=6	5.66	91325.9	9046.6	Q00839	25	31.88	0	HNRPU_HUMAN	20159	18735	18625	117658	115275	116525	47793.7	51508.7	55755.7	31251.7	32888.3	27211.3	18623.3	18419.7	18012.3	16152	14695	15896	23548.3	22756.7	23902	125139	125594	122843	110362	103776	110999	68918.7	70773.3	64574	22924.3	21765	22017	20269.7	19017.7	18981.7	14833	14926	14822	29188.7	29191.3
Dihydrolipoyl dehydrogenase_ mitochondrial OS=Homo sapiens OX=9606 GN=DLD PE=1 SV=2	7.77	54747.6	9002.83	P09622	17	34.18	0	DLDH_HUMAN	98746.7	101154	105631	52220.3	53881.3	59154.7	51287.3	53014.3	60733.7	70661.3	73010.7	81911.3	103019	103350	121485	105226	104264	124749	119784	125086	150566	56078.7	55098	55342.3	50121	49752.3	48954.3	54791.3	53728	50798	77267.3	80328.7	78513.7	97122.3	101214	101376	130837	133989	137085	125830	132300
40S ribosomal protein S17 OS=Homo sapiens OX=9606 GN=RPS17 PE=1 SV=2	10.45	15607.2	8952.41	P08708	4	34.07	0	RS17_HUMAN				5385.5	5835.67	8090	5452	5481	5422	5112	4046	4323										10872	10420	10338	13679	11806	11869	11052	10489	10261	7534	7559	7331
SUMO-activating enzyme subunit 1 OS=Homo sapiens OX=9606 GN=SAE1 PE=1 SV=1	5	38906.1	8944.28	Q9UBE0	19	63.87	0	SAE1_HUMAN	23310.7	22928.7	19490.7	39508	40085	46888	39837.3	44323	42135.7	49322	45831	49327.7	25591	23883.3	24008.7	12661	11860.7	12521.3	12291	12966	14555	44549.7	44470	44285.7	43223.3	40925.7	43052.3	48562	48205.3	45621	45054	44353	41625.7	20115.7	19255	19325.3	12547.7	12455	11326.3	13257.3	12999.7
SAP domain-containing ribonucleoprotein OS=Homo sapiens OX=9606 GN=SARNP PE=1 SV=3	6.07	23727.9	8940.42	P82979	9	58.57	0	SARNP_HUMAN	21849	21286	21649.3	9895.33	10268	11145.7	10876.3	12378.5	11034.7	18006	14579.7	17335.7	30401	29327	25322.3	28467.3	26263.3	24095.3	31425.7	33249.7	32583.7	26384.3	28131	27646.7	31610.3	32554.7	33626	30957.3	30572.3	30995.3	38489.3	38382	40757.3	39523.3	39161.3	38972.7	51951	52296	52776	67188	66746.7
Nuclear autoantigenic sperm protein OS=Homo sapiens OX=9606 GN=NASP PE=1 SV=2	4.06	85523	8931.62	P49321	40	69.04	0	NASP_HUMAN	80903	87730.3	86720.7	101635	90857.7	110770	96685	92004.3	111325	103547	99059	121722	82318	84163.3	87520.7	90412.3	84396.7	89968	91534.7	98136.7	110369	78229.7	72417.3	72111.7	76215.7	67928.3	72695.3	74582.3	71073.3	72625	75061	74621.3	72610.3	58399.7	58567.7	57689.7	75699.3	67471.7	65047.3	86645.7	84654.7
Poly(rC)-binding protein 2 OS=Homo sapiens OX=9606 GN=PCBP2 PE=1 SV=1	6.38	38979.4	8884.36	Q15366	12	38.63	0	PCBP2_HUMAN	22294.2	22767.2	22261.5	55949.3	53158.2	51871.4	44492	44721.3	42870.1	30928	26812.2	25999.3	18112.4	16349.2	16244.9	17631.6	16290.3	15409.7	19448.2	18819.7	18082.9	68232.7	64627.5	64604.3	54057.7	54732.1	55200.1	52605.1	54610.3	49807.7	23528.1	22139.7	22600.9	17306.8	15812.7	15675	13707.7	13543	13075.3	14221	14040
Septin-7 OS=Homo sapiens OX=9606 GN=SEPTIN7 PE=1 SV=2	8.97	50965.2	8835.46	Q16181	18	42.79	0	SEPT7_HUMAN	18496	17992	15847.3	27027.3	29488	29187	28492.3	29675	31297.3	34083.3	34036.3	41132	15856.3	16367.7	17830.3	2945	4319.5	3475.33	6183	6471	4851.67	30983	29663.7	28904.3	26187.3	24568.3	25651.7	28408	27558.3	25946	38780.7	36611.7	33932.3	25161.3	23301.3	23056	5165	5141.5	6249	5088	5271.67
2'-deoxynucleoside 5'-phosphate N-hydrolase 1 OS=Homo sapiens OX=9606 GN=DNPH1 PE=1 SV=1	4.78	19222.5	8833.71	O43598	8	47.13	0	DNPH1_HUMAN	27342.7	40536.7	37061.3	26618.7	25571.3	21675	26911.7	27502	31813	37891.7	38505.3	46155	45973.7	45022.3	38029	43095.7	46692.7	54851.5	42113.3	45225.7	53979.5	18870.7	17256	16444.7	19366	16841.3	18633.3	21439.7	21066	17639	26903	24628.3	21670	29196	24555	21576.3	16960	16855.7	15203.3	17057	16566
40S ribosomal protein S7 OS=Homo sapiens OX=9606 GN=RPS7 PE=1 SV=1	10.85	22126.9	8819.44	P62081	11	58.76	0	RS7_HUMAN	6826	4630	6845	12816.3	23392	19683.7	3442.33	5051.33	6549	5235	7717.33	6245.33	12379	3888	3077.67			6242			6104	10514	11994.3	11585.5	7421.33	10575	10736.3	4089.33	5046.67	3631	7917	6539	10504.3	3707.67	10825	9429.5	5840	6169	6412	4337	4529
26S proteasome non-ATPase regulatory subunit 11 OS=Homo sapiens OX=9606 GN=PSMD11 PE=1 SV=3	6.07	47749	8784.85	O00231	27	66.59	0	PSD11_HUMAN	7090	7780.33	7913.67	38781.7	38608	42403	37809.3	34290.3	38351	23172.3	19380.7	21048.3	8470.67	7529	7571.67	4164.33	4693.67	5768.67	5681.67	5845.33	5607.67	44031.7	41234	41134	34357.7	34213	35960.3	32149	31793.3	29846	16478	16840.3	17030.3	10480.3	10926.3	10774.3	6022	6487.67	5778.33	5343	3646.67
Heterogeneous nuclear ribonucleoprotein F OS=Homo sapiens OX=9606 GN=HNRNPF PE=1 SV=3	5.25	46014.1	8765.67	P52597	12	43.86	0	HNRPF_HUMAN	23413.3	21926.7	22844	53100.5	51170.3	53865.1	32914.4	40262.6	40032.4	27053.7	29929.3	29216.4	24128.7	26027.7	26635.7	20448	18795.1	22170.9	21690.3	21042.2	25048.5	47769.3	48409.3	47281.3	58467.9	53255.9	59234.2	46835.1	44532.9	40203.7	23005.7	21544	19649.7	20387.3	19150.3	17738.3	13010.3	10781.7	9765	13421	12464.7
Tropomyosin beta chain OS=Homo sapiens OX=9606 GN=TPM2 PE=1 SV=1	4.46	32964.8	8734.82	P07951	3	10.21	0	TPM2_HUMAN	8294.27	9100.91	8738.45	8853.04	9091.45	14825.6	11353.3	11462.1	20814.7	10623.9	10498.1	18716.6	15028.2	17922	26056.4	3659.01	4254.76	7140.41	3176.18	2519.45	4429.91	8593.82	8798.3	8970.46	7067.95	7235.67	7308.45	5856.01	5932.76	6006.1	6953.67	7297.42	7045.38	8850.11	9232.15	9227.04	5584.95	5065.62	5405.91
Poly(rC)-binding protein 1 OS=Homo sapiens OX=9606 GN=PCBP1 PE=1 SV=2	6.75	38011.1	8728.21	Q15365	14	51.12	0	PCBP1_HUMAN	35842.3	31058.5	30795	61347.3	62296.8	56038.9	56958.6	54335.7	53236.6	45973.7	42430.8	42083.4	28167.3	25885.3	24920.1	32475.7	31455.4	28616	36919.3	34644.3	31305.1	60252.3	57999.9	59964.7	53210.3	52245.2	52250.9	51376.9	53296	51111.9	38878	40552	37797.7	27000.3	25680.7	26145.3	30759.3	31861.3	30719	33266.7	31204.7
Phosphoglycerate kinase 2 OS=Homo sapiens OX=9606 GN=PGK2 PE=1 SV=3	8.76	45195.4	8719.2	P07205	14	34.29	0	PGK2_HUMAN				11476.6	12210.2	12474.5	6777.48	6497.6	7327.8	3497.27	3644.68	3756.87	7188.63	6792.06	5107.28	7607.29	7683.77	8905.33	12199.4	13975.4	15305.3	7265.27	7150.68	7254.93	19401	18227.8	19919.3	16505.9	15343.9	15182	5936.89	5321.34	5295.37	9976.56	9063.7	8255.81	4724.61	4352.55	4164.02	4413.96	3822.95
Keratin_ type I cuticular Ha1 OS=Homo sapiens OX=9606 GN=KRT31 PE=1 SV=3	4.64	48662.8	8695.78	Q15323	19	41.83	0	K1H1_HUMAN				507.395	349.19	804.195	2158.84	3063.25	4288.67					4201.46	7029	9385.48	10539.3	13262		9325	9973.65	989.204	1123.49	1185.29	1763.58	4681.25	2151	1691	1388.75	1275.19	2375.17	2436.84	4111.5	2182.67	1995.76	2895.23
Moesin OS=Homo sapiens OX=9606 GN=MSN PE=1 SV=3	6.03	67934.2	8677.86	P26038	46	65.16	0	MOES_HUMAN	7385.38	7384.69	7146.92	27415	28713	27239.3	28077.7	28811.7	29538.3	26091	32623.3	26869.7	7043.06	4977.1	6491.25	6049.71	4717.53	2691.36	6229.13	5399.37	5783.33	28777.8	28809.1	27581	28902.3	26514	31122	30139.7	32270.8	34303.3	30760	31642	27523	10765.8	18137.1	18574.9	6543.06	6509.99	12103.2	20497	21530.7
Vinculin OS=Homo sapiens OX=9606 GN=VCL PE=1 SV=4	5.35	124370	8670.96	P18206	66	61.9	0	VINC_HUMAN	89550.3	78713	79035.3	49777.3	45163.7	55180.3	51074.3	49311.3	53515.7	68473.7	66580.7	73668.7	81927.3	80551	85123.7	88244.3	82611	84207	63363	64820.3	66356.3	46192	51477	52360.3	48159.3	49792	49368.7	44679	42934.3	43196.3	64170	61201	63338.3	68151.7	68842	67316.7	99271	101125	94811.7	62799.3	61651
MARCKS-related protein OS=Homo sapiens OX=9606 GN=MARCKSL1 PE=1 SV=2	4.45	19585.8	8602.8	P49006	6	59.49	0	MRP_HUMAN	21106.3	20731.7	19028	18451	16900.7	17954.3	18455	16661	16110	16876	17969.3	13185.7	24653.3	24681	16672.3	33293.7	32776	23803.3	41012.3	43774.3	30544	16216.7	17448.7	18435.3	20005	20357.7	20657.3	19757	20053.7	20660.7	24098	26728.3	26662	27954.3	27661.7	27763	37166	39502	37319.3	34932	34661.7
Src substrate cortactin OS=Homo sapiens OX=9606 GN=CTTN PE=1 SV=2	5.08	61757.3	8584.18	Q14247	27	45.45	0	SRC8_HUMAN	16864	17970.7	17382.3	15120.3	14541	17105.3	16318.7	15492.7	18088	18665.3	16101	15995.3	18217	18647.7	21832	22443.3	22708.3	25750.7	30613	30666.3	34044	24081.7	23674	26248	26083.7	26656.3	28606.3	24433	23002	22697.7	25472.7	25741	26251	27354	30375.7	29603	34713.7	33224.7	33226	45509.7	42250.7
F-actin-capping protein subunit alpha-1 OS=Homo sapiens OX=9606 GN=CAPZA1 PE=1 SV=3	5.34	33093.9	8551.26	P52907	12	52.45	0	CAZA1_HUMAN	37943.5	38263.9	36602.5	37983.7	36661.4	41844.5	33801.8	35503.7	40742.6	42352.3	41356.9	48982.8	36268.3	37924.3	45299.3	27134.2	27964.8	26544.7	16831.6	17242.8	17661.2	33066.1	33233.2	34096.8	34932.4	36987.9	36815.3	36977.9	35855.9	38252	37477.7	40034.8	39786	39313.5	41197.4	41173.2	23079.7	23046.2	22719.6	11109.4	11093
Macrophage migration inhibitory factor OS=Homo sapiens OX=9606 GN=MIF PE=1 SV=4	7.98	12647.4	8474.64	P14174	3	28.7	0	MIF_HUMAN	11665	11880	9086	9714	17645	9919.5	4005	5448.5	3105	6793	11866	6098	8436	12492.5	7092	7184	12482	7627.5	20417	19524	11195.5	4858	7865	8356	4035.5		2837	5531	6074	6942	6973.5	12825	11162	9165	9982	9300	14262	12520	11415	12020	11418
60S ribosomal protein L11 OS=Homo sapiens OX=9606 GN=RPL11 PE=1 SV=2	10.13	20480.5	8400.32	P62913	4	21.35	0	RL11_HUMAN	19753	16262.5	16466.5	32705.3	33270.3	35875.3	20523	20258.3	22237	21230	21064	16153.7	16493.5	14957	17831	9919.5	8777.5	9801.5	17927	17255.5	18920.5	34423.3	36267.7	36345.7	41527.5	46540.5	44972	29316	29550.5	29300	27709.5	29086.5	30432.5	26187.5	25812.5	25238.5	9637.5	9282.5	8645	22510.5	22442.5
ATP synthase subunit delta_ mitochondrial OS=Homo sapiens OX=9606 GN=ATP5F1D PE=1 SV=2	5.2	17490	8352.03	P30049	2	13.69	0	ATPD_HUMAN	17168	16476	15305	3821	3275	4587	4511	4294	5838	6188	5887	7490	16955	15409	21664	48546	43088	52045.5	68125	75407.5	78792.5	8940							12249	11198	16421	18300	19798	29143	28460	24830	70490.5	71603	72258	83274	84642.5
Putative nascent polypeptide-associated complex subunit alpha-like protein OS=Homo sapiens OX=9606 GN=NACA4P PE=5 SV=1	4.33	23306.1	8345.25	Q9BZK3	2	12.68	0	NACP4_HUMAN	4104.12	5441.21	5117.46	7114.06	6661.47	6638.24	7082.52	6637.88	11169.4	8237.81	7956.05	7889.52	6288.75	6249.19	7586.52	4579.48	4437.17	4962.86				3611.9	4991.27	3156.33	5655.04	8881.57	5377.81	9880.6	6464.9	6275.74	6590.57	6296.53	6441.82	5301.77	4611.6	4270.6
Protein arginine N-methyltransferase 1 OS=Homo sapiens OX=9606 GN=PRMT1 PE=1 SV=3	5.02	43089	8331.48	Q99873	14	42.86	0	ANM1_HUMAN	7301.5	6525.5	6974	42358	43423.7	45728.3	42940	46933.3	48290.3	41127.7	38694.3	41158.3	7035.5	8063	10709	4043.67	4019.67	5926.33	5267	4934.33	7660	54954.3	49178.3	45142	53117	43006	50646.7	57272.7	52086.7	48481.3	40884.7	40180.7	40386.3	15105.3	14270.3	12865.3	8386	7642	6123.33	8766.33	7846
60S acidic ribosomal protein P1 OS=Homo sapiens OX=9606 GN=RPLP1 PE=1 SV=1	4	11628	8306.9	P05386	2	28.95	0	RLA1_HUMAN		10869.6	8652.93	32757.7	31343.2	29343.6	29194.3	29353.5	25284.3	27022.6	27681.9	29531.8	23127.5	24731.2	25028	15034.5	29755	19225.9	29633.5	37152.6	17225.8	13770.2	12034.9	10154.5	32962.3	10627.3	22027.2	30245.8	24429.3	16897.7	8811.57	6591.01	3933.82
Plastin-2 OS=Homo sapiens OX=9606 GN=LCP1 PE=1 SV=6	5.12	70858.8	8306.89	P13796	29	53.43	0	PLSL_HUMAN	53047	50392	50572	31563	32155.7	34913.7	34015.2	37295.3	38707.7	51669.7	46991.3	45756.3	61641.7	56155.3	61514.3	50007.1	46711	50875.3	37364.3	44173.7	66292	25581.2	25323.2	25583.6	23103.7	26472	22939.7	27041	27341.3	27974.7	40017.6	42739.3	42317.3	43659.4	43945.3	42762.3	37111.3	38308.3	35050.7	25723.7	25860.3
Eukaryotic translation initiation factor 1b OS=Homo sapiens OX=9606 GN=EIF1B PE=1 SV=2	7.27	12937.7	8305.29	O60739	1	13.27	0	EIF1B_HUMAN	4117	3782		3026	2392	3842	2979	2963	3820	2761	2553	3483	5724	5118	6387	4191	3951	5334	4335	4794	5991	3559	3920	3563	3775	4488	4125	5070	4642	4601	5164	5502	5305	7301	6086	5624	5171	5485	4808	5466	5427
Far upstream element-binding protein 2 OS=Homo sapiens OX=9606 GN=KHSRP PE=1 SV=4	6.97	73400.6	8293.42	Q92945	32	55.84	0	FUBP2_HUMAN	112124	118798	121479	105091	92453.7	95221	101685	91864.3	94758	109227	106164	104581	103256	108431	107060	112926	112852	114329	122587	121523	134658	82854.7	81897	83874.7	89292.3	78465.7	88651	88876.3	94341.7	85023.3	106473	103796	98006.7	111964	113087	110966	126375	121368	118186	118350	112983
Jupiter microtubule associated homolog 2 OS=Homo sapiens OX=9606 GN=JPT2 PE=1 SV=1	9.97	20120.4	8273.75	Q9H910	9	64.74	0	JUPI2_HUMAN	4377.5	4502	4319.5	4879	4186	5236.67	3644.33	3947	3305.33	4558.33	4514.33	5014	5846.67	6279.67	6668.67	4721.67	5561	5487	8213.33	8488	10498.7	9510.67	9122.67	8943	13447.3	13742.3	12850.7	14005.7	14600	14367.7	13519	13619.3	13996.3	13790.7	14705.7	14721.3	16019	16896.3	14689	25612.3	23049.7
Endoplasmic reticulum resident protein 29 OS=Homo sapiens OX=9606 GN=ERP29 PE=1 SV=4	7.31	29050.5	8253.43	P30040	10	31.8	0	ERP29_HUMAN	39090.3	36552	33672	40620.3	39967	39329	41014.3	38193	39882.3	45783	38711	42641.3	35367	30289.7	35674.7	40803.7	35454.3	40665	43723.7	41765	45227.3	41215	41200.7	41840	37755.7	38440	39565.3	38663.7	38920	39703.7	44176.7	45048.7	42457.3	42828	44928.7	39906	34324.7	31583	30173.7	32824.7	32802
Exportin-2 OS=Homo sapiens OX=9606 GN=CSE1L PE=1 SV=3	5.42	111215	8244.18	P55060	40	44.08	0	XPO2_HUMAN	12204.3	11610	11532.3	40827.7	39650.3	46045.3	38646	45211.3	58556.3	24592.7	25510.3	28407	18510	22935	32329.7	11241	12048	13211.7	4930.33	8905	9122.67	45214.7	44658.7	45784	38512.7	37176	42084	39832.7	38925.3	38414.3	17475.3	17047.7	16737	13252	12294	12525	13323.3	12752	11735.3	11476.7	10716
Serine/threonine-protein phosphatase 2A 65 kDa regulatory subunit A alpha isoform OS=Homo sapiens OX=9606 GN=PPP2R1A PE=1 SV=4	4.82	66107.1	8190.32	P30153	24	45.5	0	2AAA_HUMAN	12388.7	20111.7	17888	59076.3	58929.3	48037	60647	61716.7	60342.7	70775.7	68292	55593	19854	19927.3	14575.7	7441	9043.33	8189	10232	10912.3	9812.33	55857.3	58995.7	57614.7	60598.7	56678.7	58248.3	57753	58082.3	52375.3	56152.7	54744.3	53683.3	16458	16988.3	16347.3	10221.7	9076.33	8332	10698.3	10353.3
Tropomyosin alpha-1 chain OS=Homo sapiens OX=9606 GN=TPM1 PE=1 SV=2	4.49	32765.6	8175.1	P09493	6	17.25	0	TPM1_HUMAN	9496.05	10134.9	10181.1	9882.65	10365.3	9352.69	9852.09	10032.1	8946.83	10170.2	10209.6	8933.72	7077.03	9905.38	7900.16	12436.2	11719.5	13150.4	14581.2	12824.8	10646.1	6986.13	8279.18	8083.38	6612.77	6114.53	6980.8	6437.59	6535.1	7338.47	7767.64	8100.67	7671.36	7779.13	7792.05	7898.86	17743	17936.3	17997.1	12759.6	16775.8
Glutaredoxin-3 OS=Homo sapiens OX=9606 GN=GLRX3 PE=1 SV=2	5.15	37717.2	8133.25	O76003	13	47.16	0	GLRX3_HUMAN	26687	23178	23108.7	46778.7	48977	51620.7	41825.3	45807.3	48949.7	31626	28914.7	27942.7	24176	25176	23470.7	19609	16255	17742.7	15875	16517	16488.7	45905.7	46327	48406.7	42358	50747.3	46520	45164.3	46848	51184.7	26744.3	27738	28543.3	25334	25795.7	25586.7	23463	23256.7	22167.3	21990.3	21915
40S ribosomal protein S10 OS=Homo sapiens OX=9606 GN=RPS10 PE=1 SV=1	10.72	18897.8	8123.57	P46783	8	44.24	0	RS10_HUMAN	4238.5	5077	4575.67	19130.7	21194	17726.7	14246	16197.3	17577	9983.67	9325	8116	5439.33	6012.67	5659.67		3061	4448	4112.33	6202.5	5715.5	19161.3	18791.3	17961.7	24685	23246	25784	20917.7	21256	17339	15728.3	16334.3	15675.3	10076.5	6789.33	6553.33	2984		2333	4616	5149
Microtubule-associated protein RP/EB family member 1 OS=Homo sapiens OX=9606 GN=MAPRE1 PE=1 SV=3	4.83	30170.2	8094.98	Q15691	17	68.28	0	MARE1_HUMAN	13830	12249.7	12250.7	33796	34459	37140.3	34208.7	34660	33788.7	57430.3	28095	27672	12777.3	12717.3	12194	9268.33	8839	8136	8899	8889	8533	49948	47743.7	43883.3	37910.4	49133	45794.6	46674.7	45232.7	44513.7	34458.3	65406	62210	18665	22048	20185	15706	13329.7	13084	12207	11545
Threonine--tRNA ligase 1_ cytoplasmic OS=Homo sapiens OX=9606 GN=TARS1 PE=1 SV=3	6.25	84347.7	8087.12	P26639	36	49.93	0	SYTC_HUMAN	11689	12095.7	11865.3	46250.3	48174	54425	48636.7	49170	56998.7	41925.7	40222.7	52236.3	11293.7	10273	13610	12811.3	13790.7	18012	8031	6957	8362.33	79972	78517.3	80758.7	73871.7	73379.7	72315	77297.3	73944	72865.7	49129	50096.7	48941	26359	27188.3	26970.7	16360.7	16687	15528.3	20932.7	19939
Histone H1.3 OS=Homo sapiens OX=9606 GN=H1-3 PE=1 SV=2	11.78	22349.9	8015.16	P16402	9	32.58	0	H13_HUMAN	25010.7	25075.9	26414.9	70401	67694	70908.3	63229.7	64177.7	72815.3	49374	50205.4	56305	51574.2	52997.2	56812.4	60744.9	57323.6	60984.9	94426.4	99843.3	102210	44953.8	43980.4	44742.5	63167.5	68728.9	65915.2	59832.8	61550.3	61931.4	66268.7	63653.6	68853.3	69495.5	69450	70204.2	39740.9	39566.9	26276.6	52036.5	50917.6
Serine/arginine-rich splicing factor 1 OS=Homo sapiens OX=9606 GN=SRSF1 PE=1 SV=2	10.75	27858.7	8005.92	Q07955	12	35.08	0	SRSF1_HUMAN	16674.7	15667	15034.7	20064.3	20897	28709.7	15369	15214	22833.3	13947.3	13898.7	20486	14150	12349.7	14504	20939.3	20413.7	22914	33067.3	34307.3	47950	21067	19395.3	18322.3	31703.7	24501.7	29108	24821.7	25680.3	25760	29318.3	28268.7	28823.3	27609.3	27117.7	28063	48796.7	48619.7	45800.7	82730.3	83972
Histone H1.2 OS=Homo sapiens OX=9606 GN=H1-2 PE=1 SV=2	11.7	21364.8	7977.4	P16403	8	30.52	0	H12_HUMAN	25010.7	25075.9	26414.9																												17780.7	17025.5	18540.9				39740.9	39566.9	26276.6	52036.5	50917.6
DNA-(apurinic or apyrimidinic site) lyase OS=Homo sapiens OX=9606 GN=APEX1 PE=1 SV=2	8.14	35953.7	7975.28	P27695	11	37.11	0	APEX1_HUMAN	6472.67	6750.33	7134.5	47682.7	50488.7	52467	45292.7	46739.7	50272	16056	15549.7	16657	5491.67	5839.33	6271	5259	5664	4784	6979.33	7491.67	9135	53346.7	54329.3	54140.7	53112.7	51934.3	51039	51230.7	49203.7	48911.3	9098	8976.67	8627.67	5542	5875.33	5756.67	4587	5001.33	4868.33	7439	7084
Transcription factor BTF3 homolog 4 OS=Homo sapiens OX=9606 GN=BTF3L4 PE=1 SV=1	5.95	17270.6	7967.78	Q96K17	6	42.41	0	BT3L4_HUMAN	17692.7	23215.3	22935	27074	26670.3	26968	17989	22072.7	24012.7	22894.7	30079.7	33077.7	25530	30390	33740.3	25610.7	32166.3	41315	36250	39645.7	49695.3	12834.3	10483	9737	21768	22334.7	22542.3	24925	25602.7	23512	32034	31395	30233.3	26870.7	27106	26379.3	38722.5	27968	26911.7	53183	37483.7
U6 snRNA-associated Sm-like protein LSm3 OS=Homo sapiens OX=9606 GN=LSM3 PE=1 SV=2	4.38	11845.4	7946.73	P62310	2	28.43	0	LSM3_HUMAN	12116	10725	8715	7135	6175	4733.5	5106	3352	5829	9553	7930	9450				17367	13282	16356	14851	15708	17804	15817	15271	16957	12342	14547	13877	13843	15390	16881	18083	19050	18812	12643	12795	13092	15820	11671	8969	22079	17071
Eukaryotic translation initiation factor 3 subunit L OS=Homo sapiens OX=9606 GN=EIF3L PE=1 SV=1	5.92	66955.2	7907.41	Q9Y262	27	52.13	0	EIF3L_HUMAN				26507	26578.7	28327.7	22275	22880.7	21231	25531.3	23353.3	22469	6151	6623.67	8196.67			2142.5			2607.5	32211	35615.7	36766	31266.7	35838.3	33860.3	28386.7	30419	29554.3	19331.7	20065.3	19193	6692.33	7459.67	7225	3816	4381.67	4041.33	7702.33	7526.67
Eukaryotic initiation factor 4A-III OS=Homo sapiens OX=9606 GN=EIF4A3 PE=1 SV=4	6.32	47156.3	7895.42	P38919	23	50.61	0	IF4A3_HUMAN	13213	14508.7	16390.7	28631.3	26525.3	28358.7	24191.7	22054.3	24376	16377.3	15995.7	18393	11193.7	14363.3	14429.3	9775	11949.7	18975	11698.3	14765.7	22002	36216	34118	34501.7	33602	30570.7	30931	33112.7	33538	29958.3	17706.7	16981.7	18685.7	13215.3	13766.7	14434.7	12743	14084.3	14351	13204	13548
Biliverdin reductase A OS=Homo sapiens OX=9606 GN=BLVRA PE=1 SV=2	6.05	33713.7	7888.06	P53004	15	47.97	0	BIEA_HUMAN	12164.7	11581	12668.3	29306	29800.7	30869.3	30382	32163.3	32686	37354	34573.7	35590.3	10924.3	11091	9991.67	3034	8959.67	12168	3834.5	8845.67	12070.3	24642	25611.7	24965.3	21897.7	27616.3	22911.3	23940.3	24650	24566	26137.3	25724.3	32496	11774.3	14381.7	20000.7	6432	5075.5	6999.5	6608	7162
Proteasome subunit alpha type-4 OS=Homo sapiens OX=9606 GN=PSMA4 PE=1 SV=1	7.72	29769	7883.23	P25789	11	37.16	0	PSA4_HUMAN	61538.3	62924	63629	37119.7	36364.3	34501.7	40590.7	38763.7	36171	51943	48903.7	49938	65462.3	60943.3	66153.7	74010	74506.3	53683.3	77969.3	87970.3	86002	48601.3	38553.3	44954	35030.3	38300.3	34393.7	37407.3	37863.3	36756.7	51813.3	50135	51478.7	58841.3	58874	56477.3	73409.7	74409	64893.7	80557.7	82850.7
Glutamine amidotransferase-like class 1 domain-containing protein 3A_ mitochondrial OS=Homo sapiens OX=9606 GN=GATD3A PE=1 SV=1	8.29	28512.6	7861.52	P0DPI2	8	40.3	0	GAL3A_HUMAN	39059	39196.7	38447.3	26991	26809.3	32090	25764	25648	31814	34741	34786.7	42886.7	52130.3	51620	59362.3	54140	53110.3	56891.3	56698	68851.7	71259	25270	23075	24304.3	27896.7	26255.7	25680.7	31089	28484.3	29377.3	40921	43477.7	39022.7	48036.3	46308	46028.7	56926	57226.3	57469	79260	73110
Histone H2A.V OS=Homo sapiens OX=9606 GN=H2AFV PE=1 SV=3	11.28	13508.7	7859.42	Q71UI9	4	31.25	0	H2AV_HUMAN	19967.9	19736.5	18861.8	22566.1	24552.4	24475.3	17473.8	17988.6	17007.5	21872.9	20790.1	18696.6	12392	12468.4	11012.1	21813.3	20095.3	19014.8	31298.7	33239.6	29949	35839.1	37194.2	37486.7	35172.2	35596.4	35065.6	33885	33618.7	36403.9	43216.3	42903.2	44553.9	59821.7	62746	61039.3	56003.7	55146	54488.3	71195.3	72013.3
Protein phosphatase inhibitor 2 OS=Homo sapiens OX=9606 GN=PPP1R2 PE=1 SV=2	4.44	23072.3	7813.45	P41236	10	60	0	IPP2_HUMAN	10575.3	10765.3	9660	8253	8149.78	8876.34	8510.67	6769.02	8414.5	8546.52	7556.33	8962.68	10013.7	8690.33	9453.2	10862.1	10201.6	9985.46	13150.3	13473.8	15520.8	8843.67	8823.33	9185.67	7594.41	7909.93	8272.68	7681.74	7593.04	7803.19	9809.97	9932.27	10760.5	13329.3	13566	14189.7	19258.7	19286.3	17336.7	25487	25078
Cullin-associated NEDD8-dissociated protein 1 OS=Homo sapiens OX=9606 GN=CAND1 PE=1 SV=2	5.42	138087	7806.13	Q86VP6	43	37.48	0	CAND1_HUMAN	69387	73444.7	76959	53689.3	56843.3	54544.7	57396.7	58894.7	57296	78237	69085.7	68768	79113	80540.7	77655.7	25115.7	23614.3	18580.3	20670	22317.3	11200	49210.7	47081	46732	45131	42781.3	41331.7	45738.7	47088.3	42925.7	61858.3	58580.7	61406.3	60325.7	56252	57413.7	18880.7	18695.3	18535.3	12969.7	13359
Myotrophin OS=Homo sapiens OX=9606 GN=MTPN PE=1 SV=2	5.14	13065.9	7803.16	P58546	4	31.36	0	MTPN_HUMAN	15670	13173.3	12567.7	18839.3	17847.7	17184	18570.7	19188.3	14578.7	21265	21474.7	21584	16933	16849.7	17531.5	12428	12256	9153	15056.7	15544.3	14270.3	15278.7	15410	17075.7	18619.3	18119	17641	22141.3	20969.7	21229	19501.3	19856.7	19464.7	13417.3	13940	13136.7	12110.3	17989.3	16045.5	17140	16430.3
Beta-actin-like protein 2 OS=Homo sapiens OX=9606 GN=ACTBL2 PE=1 SV=2	5.26	42345.5	7798.23	Q562R1	10	23.94	0	ACTBL_HUMAN	14913.3	14149.7	15145.2	4286.16	4200.57	4688.6	4698.3	5007.72	5497.06	8084.27	7723.72	8588.63	6884.72	7170.95	8018.71	9947.82	9203.71	11280.9	9054.96	8534.75	10867.3	1809.79	1704.18	1771.3	1910.29	1868.93	1770.23	4031.81	4243.4	3725.24				6144.28	6218.69	6047.17	16478.9	15345.9	13870.3
Heterogeneous nuclear ribonucleoprotein H2 OS=Homo sapiens OX=9606 GN=HNRNPH2 PE=1 SV=1	5.88	49548.8	7771.16	P55795	13	28.51	0	HNRH2_HUMAN	18732.2	16910.5	17153.6	9385.03	8963.08	10856.8	18878.1	18225.2	20246.9	13572.6	13430.5	15149.2	18027.6	17447.8	18998.6	19684.8	17158.6	20086.1	20363.1	19110.8	22108.9	15275.3	14917.6	14981.5	18191	19654.4	16578.5	23848.2	23650.6	23772.9	21632	20650.1	21270.2	15124.5	14866.7	14346.4	10045.5	10172.6	9016.65	15790.4	14929.1
Putative ubiquitin-conjugating enzyme E2 N-like OS=Homo sapiens OX=9606 GN=UBE2NL PE=1 SV=1	5.58	17377	7761.15	Q5JXB2	5	37.91	0	UE2NL_HUMAN
POTE ankyrin domain family member J OS=Homo sapiens OX=9606 GN=POTEJ PE=3 SV=1	5.6	118816	7680.06	P0CG39	23	22.35	0	POTEJ_HUMAN	6715.77	7237.96	8161.98	4833.1	3997.96	5522.11	6936.82	5856.37	6024.3	4135.11	4293.58	5556.93				9474.61	8571.61	10622.6				5201	4723.33	4667.44	5058.06	4561.41	4332	6025.5	5710.99	4954.47	7473.72	7213.1	7092.83	4691.32	4908.14	5020.88	6468.56	6417.19	6005.63	12710.1	11642.6
Proteasome subunit alpha-type 8 OS=Homo sapiens OX=9606 GN=PSMA8 PE=2 SV=3	9.44	28700.9	7679.6	Q8TAA3	8	37.11	0	PSMA8_HUMAN				4170.27	4447.13	4478.63	3782.91	3949.01	3915.6													3371.16	3472.47	3338.09	6845.64	6188.14	6553.76	3545.86	3341.23	3044.76				3287.86	3214.44	3104.87
Ribose-phosphate pyrophosphokinase 2 OS=Homo sapiens OX=9606 GN=PRPS2 PE=1 SV=2	6.18	35168.4	7654.83	P11908	12	39.94	0	PRPS2_HUMAN	11449.4	18712.3	15073.6	47030.6	41929.6	48655.4	41809.8	38745.8	38895.3	49024.4	47745.6	49101.7	24301.8	22825	21819.3	28299.3	30420.9	25366.4	22748.8	21763.6	15605.2	46104	40785.2	36029.4	41277	28711.7	35802	38356.8	34544.6	26144.7	30936.7	26374.3	20221.4	17093.7	15844.2	14930.5
Cyclin-dependent kinase inhibitor 2A OS=Homo sapiens OX=9606 GN=CDKN2A PE=1 SV=2	5.43	16589.7	7607.37	P42771	7	61.54	0	CDN2A_HUMAN	15092	9222.5	8908	8802.72	9936.2	11411.8	7886.52	9360.96	9255.35	9755.68	8935.95	8497.82	8676	9271.67	8943	11772	12570	5569.33	14528	14815	7906.5	17704.1	18535.3	17687.3	20284	19542.9	21662.5	18436.2	18256.8	17546.4	16335.7	16767	16619.7	15323.3	16617.3	15946	15399	13607	13166.3	12325.3	12417.7
Small nuclear ribonucleoprotein Sm D3 OS=Homo sapiens OX=9606 GN=SNRPD3 PE=1 SV=1	10.97	14030.4	7570.01	P62318	3	16.67	0	SMD3_HUMAN	28249	29609	28778	18302	20161	16934	18446.5	35046	26387	48864	33985	26381	43484	37209	24931	27571	25799	21870	38441	32539	17057	52035	43506	22881	46051	36739	44542	50918	47184	46888	50369	44376	37820	36018	27369	18725	7262			8868	6752
Heterogeneous nuclear ribonucleoprotein D0 OS=Homo sapiens OX=9606 GN=HNRNPD PE=1 SV=1	7.92	38605.3	7543.72	Q14103	14	32.11	0	HNRPD_HUMAN	40849.7	46555	47499.4	63952.1	63585.6	69773.3	48380.1	49886.1	51143.8	58348.2	55317.6	58366.2	59902.3	59856.7	54173.7	58117.6	57530.7	56357.8	62632.9	63996.2	59474.2	44693.7	41941.6	41374.7	51762.6	46965.7	51144.9	52427.9	52257.6	45301.3	61415.7	52975.9	50110.9	51218.3	44855	44838.3	54071.7	54008	50209.7	50702	48193
Eukaryotic translation initiation factor 3 subunit M OS=Homo sapiens OX=9606 GN=EIF3M PE=1 SV=1	5.29	42959.2	7536.93	Q7L2H7	11	29.95	0	EIF3M_HUMAN				33481.3	32762	29917	27005	28067	24899	12771	12375	11256.3	4353.67	3772.33	4980.67		3663	4360.33		3571	5201	27354.3	30151.7	25039.7	36212	27709.3	32914.7	31767	31211.7	23289.7	6242	5919	4946	4372.67	4195.5	4154		2929	3503	4491	4108
40S ribosomal protein S14 OS=Homo sapiens OX=9606 GN=RPS14 PE=1 SV=3	10.78	16443.8	7526.93	P62263	6	37.09	0	RS14_HUMAN	9891	8886	9242.67	19146	18551.7	19848.7	13259.3	12892.7	14068	9722.33	9169	9987	7590.33	7053	8139.33	4758	6243	6966.67	13662.7	10010	12212.7	22125.7	22847.3	22680.7	27666.3	28859.7	26859.7	23807.3	24265.3	23560	20695	20079.3	19752	14536.3	14981.3	14844.7	5090.67	5277	5385.33	19029.7	16259
RuvB-like 1 OS=Homo sapiens OX=9606 GN=RUVBL1 PE=1 SV=1	6.02	50570.3	7476.49	Q9Y265	18	50.22	0	RUVB1_HUMAN	62093.7	59687.7	62655	52448.3	54771.3	50684.7	49659	52350.7	50166.3	63754	59892.7	59303.7	55520.7	52809	52466	37367.7	36035	35897.3	20508.3	21199	20189	77803.7	70205.3	72941.7	66030.3	66953	67606.7	68136.7	67666.7	66061	84176.3	85563.7	95149.7	81919	83783.3	77060	68192.7	68497	68531.3	24092.7	22930.7
Putative annexin A2-like protein OS=Homo sapiens OX=9606 GN=ANXA2P2 PE=5 SV=2	6.58	38830.2	7472.84	A6NMY6	19	52.21	0	AXA2L_HUMAN	6822.2	6453.18	6629.64							7841.6	7335.79	7994.59	4969.32	5206.73	5277.31	3308.54	4094.4	3610.44	2984.56	3308.49	3233.86													4871.99	4963	5032.39	2546.96	2532.67	2869.79
Ubiquitin-conjugating enzyme E2 L3 OS=Homo sapiens OX=9606 GN=UBE2L3 PE=1 SV=1	8.82	18032.7	7453.85	P68036	6	53.25	0	UB2L3_HUMAN	26507	21648.7	21239.3	31677.7	36048.7	38962.3	26648.7	28952.3	35254	27603.7	33345.3	38735.7	30574	35305	43484.3	17380	19483.7	22853.3	20331.7	21312.3	25270.3	31191	32083.3	32961	37692.3	39045	37825.7	39683.7	38034.3	38139.3	34584.7	34649.7	36461.3	31331.3	31616.3	30641	29582	31483.5	29811.5	35415.5	32824.5
Prostaglandin E synthase 3 OS=Homo sapiens OX=9606 GN=PTGES3 PE=1 SV=1	4.12	18982.6	7439.2	Q15185	5	32.5	0	TEBP_HUMAN	31490	35377	30755	41920.7	40381	42987.7	36494	35457.3	37846	26447.3	28860.3	28535.3	28027.7	28620.3	30490.3	32205.5	20136	24330.7	32487.5	32947	30702	29164.7	30260.7	29625.3	41235	37710.7	39196.3	40139.3	40982.3	41531	27754	28877.7	27310	26267	28424.3	26735.7	22555	22288.7	22447	31778.7	32386.3
Mitotic checkpoint protein BUB3 OS=Homo sapiens OX=9606 GN=BUB3 PE=1 SV=1	6.42	37611.1	7438.69	O43684	13	43.29	0	BUB3_HUMAN	24927	23750	25234	26338.7	26639	24471.7	25024.7	24950.7	19964.7	28187.7	25537	25038	20204.7	18792.7	15358.7	16373.3	14684.3	19217.3	15573.7	15352.3	18184.3	36884.3	34674	33035.7	38026.3	30328.3	34167.3	38040.3	38681	31960	37310	34465.7	32770.3	31353.7	29742.3	28310.7	25286	24676	24872.3	18161.3	21810
RNA transcription_ translation and transport factor protein OS=Homo sapiens OX=9606 GN=RTRAF PE=1 SV=1	6.23	28182.2	7419.76	Q9Y224	17	75.41	0	RTRAF_HUMAN	45067.7	45497.7	49760.3	43522.3	48288.3	43217.7	39985.3	44365.3	38942.7	43748.3	40717.3	42510	34068	33716.7	28242	48962	42716.7	45386	50912.3	50213.3	52568.7	19346	19208	18865.3	17861.3	18120.3	18683.7	18641	20428.3	18865.7	8503	8828.67	11061.3	7422.67	7306	7042	12512.7	12801	10384	11817	11408.3
U2 small nuclear ribonucleoprotein A' OS=Homo sapiens OX=9606 GN=SNRPA1 PE=1 SV=2	9.05	28529.7	7382.56	P09661	11	41.57	0	RU2A_HUMAN	42978.7	44036.7	43326.7	42266.3	52678.7	21004.3	40553	46883.3	17195.3	18880.3	22755.3	21601.3	29851	31535	19824.3	30516.3	30001.7	10566	30394	32997.7	10307	21699.7	21873.3	21497.3	21073	22258.3	22410	22660	24029.3	22193	30941.3	30869.3	31287.3	99978.3	98361.3	102829	127944	127593	125204	81108	81032
Asparagine synthetase [glutamine-hydrolyzing] OS=Homo sapiens OX=9606 GN=ASNS PE=1 SV=4	6.43	64940.3	7371.36	P08243	23	45.1	0	ASNS_HUMAN				33763.3	31348.3	32888	32142	32354.3	33463	23164	22203.3	23462.7	2307	2237.5	3187.5						2298	63624.3	57616.3	56332.3	51153.7	45513	49388.3	52722.3	52428.7	50906	22679	20095	20398.7	6497.33	5748	5577	6902	4254	4700.5	7409	4594
Actin-related protein 2/3 complex subunit 4 OS=Homo sapiens OX=9606 GN=ARPC4 PE=1 SV=3	8.78	19781.1	7324.39	P59998	8	52.38	0	ARPC4_HUMAN	46682	45149.3	47597	29945	29638	32701.3	32604.7	32569.3	31975.3	45525	40915	42818.3	40403.7	41996	39196.7	24608.3	23066	24135.3	10171.7	10757.3	10991	37748.7	38586.3	38755.7	33262.7	33170.7	35876.3	35172.3	37829.7	39573	49058.7	49673.3	50679.7	48789.3	49794.3	48006.3	37828.7	36263.7	33976.3	12221.7	12669
Heterogeneous nuclear ribonucleoprotein A/B OS=Homo sapiens OX=9606 GN=HNRNPAB PE=1 SV=2	8.49	36339	7310.95	Q99729	10	32.23	0	ROAA_HUMAN	15267	18121.3	17267.3	33262.7	32287.7	36303	22996.7	22063.3	31112.3	23178.7	21516.3	28614	27428.3	26285	42339	23229	23709	31342.3	29896.7	26686	37235.7	29419	30016.7	28955.7	37319.3	37618	38502.7	32439.7	32380.3	32621.3	34047	35915.3	33255.3	34625	28505.3	42450.5	77412	84933	86760	88697	86959
S-formylglutathione hydrolase OS=Homo sapiens OX=9606 GN=ESD PE=1 SV=2	6.62	31976.1	7291.8	P10768	9	43.62	0	ESTD_HUMAN	19835	18025.7	17869.3	29959.3	20529.3	38465.7	31141.3	27798.7	36310.3	40862.7	33442.7	46044.7	24992	17057.3	28256.7	5223	4784	6727	5302	5128	5607.33	46775	36245.3	35585	31984.3	33215	39403.7	35940.7	34337.7	38332	59890.7	56323.7	54535	34423	44701.7	40317.3	7109.33	7317.33	7233	5736.5	6130.5
Prelamin-A/C OS=Homo sapiens OX=9606 GN=LMNA PE=1 SV=1	6.61	74424.7	7242.8	P02545	39	56.48	0	LMNA_HUMAN	29981.3	28918.3	28915	21377.7	17576	15776.7	26587	14774.7	19938.3	42750	40348.7	31540.3	31594.7	30562.3	27539	12028.3	12155.7	10860.7	11014.7	10208.7	9446.33	25099	23737	23647	20521.7	19331.3	20418.3	20131.7	20187	20824.3	27008.7	26619.7	22779.7	21259.3	19761.7	19174	9609.33	10116	10275	13724.7	13317.7
Chloride intracellular channel protein 1 OS=Homo sapiens OX=9606 GN=CLIC1 PE=1 SV=4	4.9	27264.9	7228.52	O00299	8	38.59	0	CLIC1_HUMAN	24768.7	24839.3	25009.3	64293.3	65724.7	63306.3	65397.3	64882	62324	69648	67434	65292.3	26709.3	26185	22933.3	14479.3	13872	12018.3	20001.3	19418.3	14337.7	65474.3	66731.7	64982.3	62058.3	59887.3	62692.3	67029.3	66381.3	60689	64843.3	65200.3	65200	27825.7	25959.3	26712	14383.3	14110.3	14031.3	18893.3	17254
Gamma-enolase OS=Homo sapiens OX=9606 GN=ENO2 PE=1 SV=3	4.72	47610.8	7218.06	P09104	15	55.99	0	ENOG_HUMAN	12124.7	16506.3	14487.2	11959	12110.8	13066.9	11771.9	13256.2	13867.2	16761.4	16361.2	19284.8	15338	15802	16822	12201.6	15563.2	14545.5	7960.92	8669.5	9249.92	10190.3	10256.9	8455.56	11659.8	8752.49	10920.4	12922.6	10953.4	9775.81	16903.1	15027.9	13994.6	13001.5	11845	9168	13149.3	11908	11097.7	7377	6869.5
Neudesin OS=Homo sapiens OX=9606 GN=NENF PE=1 SV=1	5.37	18856.4	7193.17	Q9UMX5	7	51.74	0	NENF_HUMAN	21756.7	22246.7	22228	12517	13448.3	12654	13594	13314	12172.3	19354.7	12161.3	14084	27085.7	36691.3	25686.7	28516.7	36562	28476	45727.3	44702.7	36163	12732.7	12712	12551.3	12729.7	13864.3	13970	16075	15541.7	15595	19536.7	19941	18026.7	20692	21755.3	19701.3	22003.7	22212.3	21612	23522.7	22583.3
40S ribosomal protein S19 OS=Homo sapiens OX=9606 GN=RPS19 PE=1 SV=2	10.98	16060.5	7191.58	P39019	9	51.72	0	RS19_HUMAN	5080	4508	5147.33	11588.3	11645.3	10823.3	10017.3	9297.33	9028.67	7057.33	7284.67	8106	4844	5370.33	5997.33	18362	15563	5898	3975	3632	4915.33	15613	15844	15352	20620	20863.3	21090.7	18931.3	18954	18312.3	12327	12516	13550.3	12833	13151.3	13314	6406	6073.5	6259.33	16377.7	15131.3
Tumor protein D52 OS=Homo sapiens OX=9606 GN=TPD52 PE=1 SV=2	4.59	24384.1	7191.22	P55327	9	57.14	0	TPD52_HUMAN	35666	30587	29875.7	45373.7	45759	37564.7	41200.7	42248.7	36449.3	37966.3	37722.7	31554	32357	28679.3	28635	38645.3	36152	36865.3	44335	43133.3	39825.7	33067	33968.3	33310.3	28483.7	33350.3	28945.7	23770.7	23086	22763.7	22088	23942.7	23842.3	27670.3	25444	27489	38667	34079	33544.3	38869.3	35762.3
Heat shock protein 75 kDa_ mitochondrial OS=Homo sapiens OX=9606 GN=TRAP1 PE=1 SV=3	8.31	80395.3	7186.31	Q12931	37	56.25	0	TRAP1_HUMAN	9773	8591.5	7232.67	33289	28133.7	33111	34438	30791.7	46731	20071	19277	23183	9764	10254.5	16254	8498	7697	14950.3	9091.67	10497	17019.7	32071	32727.3	33160.3	30500.3	29276.7	31187.3	30330.3	29346	29682	16287.3	17225.7	16285.3	2698	3154.33	2467	7547.67	8033	7499.33	11219.3	11097.3
Heme-binding protein 2 OS=Homo sapiens OX=9606 GN=HEBP2 PE=1 SV=1	4.35	22875.5	7186.03	Q9Y5Z4	7	39.02	0	HEBP2_HUMAN	16832	16792.7	15263.3	20334.3	18452.3	21599	20201	19586	22932.7	22706	20996.3	24886.3	17157.3	16583.7	19189	14252	13597.3	17630	17688	19009	21299.7	16222.7	15742.7	14917.7	17359.3	16141.7	17880.7	18211.3	18399.3	17399.7	17917	18414.7	17833.3	14506	15352.3	14134	14383	11738	10783	20473.5	20117.3
Ubiquitin thioesterase OTUB1 OS=Homo sapiens OX=9606 GN=OTUB1 PE=1 SV=2	4.66	31512.2	7160.77	Q96FW1	10	40.22	0	OTUB1_HUMAN	7803.33	9839	6889	28382.3	28729	33359	28559.7	29747.3	34281.7	30798.3	32076.3	37067.3	12781.7	14042.3	14364.7	7213.33	6950	8948.67	7559	7425	10887.7	29259	28551	28606.7	27916	27575.3	26737.7	28374.3	26269.7	25202.7	24239.7	24644	25670	12778.3	13387.7	12362	10087	9642	10013.3	9897	9859.67
C-1-tetrahydrofolate synthase_ cytoplasmic OS=Homo sapiens OX=9606 GN=MTHFD1 PE=1 SV=3	6.94	102244	7138.56	P11586	39	49.41	0	C1TC_HUMAN	11061.3	10324	10297.7	58343.3	60540	59892.7	49054.3	52701.7	49968.3	15659.7	14902.3	16351.3	9468	9174.67	9704	5103.5	6339.5	4439.67	3446.33	3077.33	4572.67	63366	63321.7	62568.3	55653.7	63049	57338.3	52786	53695	53333.7	25158.3	25793.7	25401	23801.3	22891	20279.3	8680.67	8369.67	8070.33	8420.67	8761.33
Chromobox protein homolog 3 OS=Homo sapiens OX=9606 GN=CBX3 PE=1 SV=4	5.04	20982.5	7112.29	Q13185	7	34.97	0	CBX3_HUMAN	23408	22485.3	21500.7	26845.2	27779.1	23121.3	30597	25525.3	18425.8	23149	23536.7	21247.1	26405.7	25439.7	20950.7	23777	22351.3	21805.3	25130	26257	26583.3	22950	21387	20686.7	27867.8	24280	26307.3	23760.7	27074.7	27197	21588.7	21895.7	21133.7	20144.7	16537	15839	22536.7	19277	16798	32451	30221.3
UV excision repair protein RAD23 homolog B OS=Homo sapiens OX=9606 GN=RAD23B PE=1 SV=1	4.58	43228.3	7111.08	P54727	15	50.12	0	RD23B_HUMAN	51972.9	52331.2	49115	28534.7	28689.2	33465.2	31105.1	29356.8	34652.4	38412	37730.9	45979.8	56083.1	54914.2	59364.4	68149.8	60684.7	68326.5	68627.9	71411.4	78080.9	34757.1	35963.1	35582.6	39049.5	38375.5	39397	39422.3	38747.7	39435.9	55694.2	56287.3	55413.9	62478.9	59517.3	60193.4	85222.3	82057.1	80791.3	90888.7	85632.7
Neutral alpha-glucosidase AB OS=Homo sapiens OX=9606 GN=GANAB PE=1 SV=3	5.72	107330	7107.15	Q14697	40	52.12	0	GANAB_HUMAN	36732.7	34058.7	32504.3	50575.7	47142.7	58668	52708.7	46290	59272.7	42117.3	39656.3	52568	29383	28390.3	31492.7	43841	38176.3	41058.3	43045	45519	48198.3	54888.3	61974.7	60406	53298.3	47219	53908	55743	53927	55130.7	39470.7	40116.3	38430	38415.7	40354.3	37407.7	46356	42778	42786	49891.7	49717.7
Putative heat shock protein HSP 90-alpha A4 OS=Homo sapiens OX=9606 GN=HSP90AA4P PE=5 SV=1	4.89	47826	7086.98	Q58FG1	13	32.3	0	HS904_HUMAN	6130.95	7714.45	7756.7	16072.3	15157.3	17154.3	15111.3	14789.4	16682.7	12190.7	12469.7	13696.7	7201	7333.67	8713	3256.67	2995.44	5798.67	4883	3673.87	6093	15538	15026.3	15033.7	17610	16621.3	16985.7	18017	17254.7	15931	13272.7	13081.3	12537.7	28789.7	18868.3	10776.7	13416.3	8956	8930.33	12658.1	11851.1
Nicotinamide phosphoribosyltransferase OS=Homo sapiens OX=9606 GN=NAMPT PE=1 SV=1	6.78	55806.3	7085.44	P43490	29	63.54	0	NAMPT_HUMAN	37143	40445.7	38613.7	33917.7	31150.7	33901.3	37464	36119.7	37127	46892	43325.3	43855.7	46222	42765	45333	6645.33	6840.33	7745	4144.33	4345	6324.33	31943.7	31109.3	30063.7	30677.3	29944	30117.7	32349.7	31922.3	32451	45943	44247.7	44200	39785.3	40176	40068	8234	8385.67	8330.67	8724	9526.67
Prefoldin subunit 6 OS=Homo sapiens OX=9606 GN=PFDN6 PE=1 SV=1	9.52	14582.7	7081.84	O15212	6	46.51	0	PFD6_HUMAN	11967	10979.3	9893.67	9672.67	9539.33	8413.67	8874.67	9625.33	8116.67	11803	10859	10732	9766	10080	10569	12293	12791.7	12313	14015	13830.7	13799.3	7772.33	8215.33	7893	11131.3	11135.7	11456.7	11718	11347	12916	13357	12776.7	12056.7	11554.3	11544.3	11183.3	15473	17159.5	16322	19527	19262
Transcription intermediary factor 1-beta OS=Homo sapiens OX=9606 GN=TRIM28 PE=1 SV=5	5.43	90317.6	7078.57	Q13263	26	44.79	0	TIF1B_HUMAN	31980.7	27897	28917.3	52633	55749.7	58074	40192	42699	47233	31156.7	29957.7	36305	23006.7	24219.3	28602.7	28862.3	24759.3	31821.3	31801	33328	41033.3	59081.7	57193.3	56180.7	64334	64368.7	61390	58091	58558.7	56151	30588.3	29106	29794.3	26089	25114.3	25672	23484	25119.7	22722	26596.3	26904.7
Signal recognition particle 14 kDa protein OS=Homo sapiens OX=9606 GN=SRP14 PE=1 SV=2	10.74	14684	7069.14	P37108	2	17.65	0	SRP14_HUMAN	26574	25072	26018	10727	10552.5	11675.5	12239	12106	14586	11562.5	12596.5	15163.5	27907	30256	31561	10266	10134.5	8769.5	7296	14369	4878	4677	4566	2866	10849.5	8632.5	11835	9764	8480	7654	11814	11499	12437	13910	13843	15102	8627	8301	8456
Activator of 90 kDa heat shock protein ATPase homolog 1 OS=Homo sapiens OX=9606 GN=AHSA1 PE=1 SV=1	5.26	38445.5	7032.04	O95433	16	61.24	0	AHSA1_HUMAN	11047.7	10953.3	9853.67	25641	30546	28685.3	19684.3	28288	25569.7	18167	20762.3	21133	11023.7	11645.7	11933.3	6789	7217.33	9100.33	8574.67	11921	8987.33	26942	27921.3	27035	25696.3	24765	25472.3	24680	24431	23959.7	16491.3	17025.3	16707.3	10917.7	9757.33	10807	9865.33	9235.67	7368	9129.67	8796
Sorcin OS=Homo sapiens OX=9606 GN=SRI PE=1 SV=1	5.17	21961.6	7020.7	P30626	10	39.39	0	SORCN_HUMAN	34918	34682	33425.3	35265.3	35070.3	37727.3	35083	33899	36821.3	45408.7	44636	43219	33000	32369.3	33821	14924	14894.7	15218	13812.3	14370	15545.7	36244	35859.7	36949.3	34448.3	32628	35209	36818	36131.7	36562	44216.3	45012.7	44710.3	40830.7	41665.7	40082.7	21785	21056	20316.7	19848.3	19914.7
Keratin_ type II cuticular Hb5 OS=Homo sapiens OX=9606 GN=KRT85 PE=1 SV=1	6.22	57341.9	7013.84	P78386	17	28.4	0	KRT85_HUMAN										4024.52	4065.36	5019.67	686.91	665.639					1290.92	1323.25	1634				5338	3955	4320.33	4240	4889.33	4934.67
Tumor protein D54 OS=Homo sapiens OX=9606 GN=TPD52L2 PE=1 SV=2	5.08	22294.8	6974.96	O43399	11	59.71	0	TPD54_HUMAN	49982.7	47338.7	52170.7	22894	23022	21530	26608	24854	26761.3	33081.7	34627	35335.3	44520.3	45367.7	47294	50444.3	50870.3	52281	56339	58294.3	65364.3	11556.3	12185.3	11465	14016.7	15322	14607.7	16125.3	15548	16091	26861.3	26832	26819	30049	26771.7	29447.7	38837	39464.7	35955	51763.3	51671
Brain acid soluble protein 1 OS=Homo sapiens OX=9606 GN=BASP1 PE=1 SV=2	4.42	22693.4	6920.72	P80723	15	78.41	0	BASP1_HUMAN	36181.7	34057	31891.3	28837.7	26659.7	49301.3	29269.7	27491	49901.7	29822	30213.3	54193	38511.3	40063	73510.7	49424.3	47158.3	73776	60484	63338.3	97207	60439.3	60331.3	59431.3	63853	62248.7	65044.7	68731.3	67658	67006	86367.3	91045	80149.3	88169.3	95381.3	90899.3	107479	104721	107730	109493	110662
Protein phosphatase inhibitor 2 family member B OS=Homo sapiens OX=9606 GN=PPP1R2B PE=1 SV=2	4.58	23163.5	6906.74	Q6NXS1	6	52.2	0	IPP2B_HUMAN				1429.96	1658.89	1998.05	1930.97	2005.4	2392.39	2699.23	2606.24	2793.99	2738.09	2832.18	3410.91	4102.11	3896.52	4241.08	4982.21	5207.7	5995.48				1735.56	1920.57	2080.66	2210.93	2063.88	2202.81	3148.48	3148.65	3340.09
Eukaryotic translation initiation factor 3 subunit B OS=Homo sapiens OX=9606 GN=EIF3B PE=1 SV=3	4.7	92880.9	6894.7	P55884	31	42.26	0	EIF3B_HUMAN	9442.67	7456.67	7410.33	34004.3	31955.3	39893.3	25516.3	24625	29219.3	10245.3	9331.33	11968.3	8746.67	8514	8908.67	10580.3	10110	11179	10193.7	9788.67	11292.7	42550.3	46354.7	50733.3	42965	41586	38707.3	39171.7	37586.3	40359.7	15345.7	14420.3	14229.3	16506.7	14968.3	14804.3	16500.3	16468.7	12905.3	16311.7	15566.3
Small ubiquitin-related modifier 2 OS=Homo sapiens OX=9606 GN=SUMO2 PE=1 SV=3	5.17	10928.3	6892.31	P61956	2	18.95	0	SUMO2_HUMAN	99743	105460	102144	75946.5	79058	174280	70833	72865	147866	90121.5	86835	169595	164852	196542	210476	88141	85392.5	165766	90495.5	100711	225309	175304	149837	145428	179926	172947	169773	188249	176826	172882	184044	190623	172712	189815	202808	184477	216458	205666	221285	233056	243889
Thioredoxin domain-containing protein 17 OS=Homo sapiens OX=9606 GN=TXNDC17 PE=1 SV=1	5.24	14226	6863.45	Q9BRA2	4	33.33	0	TXD17_HUMAN	23792.5	16388	22739.5	25205.3	25432.3	22047.7	21393.3	25219.7	22104.3	24606.3	27870.3	25423	17572	18935	17017.3	14277.3	20785	15359.3	15520.3	18249.7	15178.7	16709.3	15686	14982.7	17717.3	18243	17581.7	19755	19060	17008	16855	15228.3	22294.5	11476.3	14608	16314	20868	35952	18434.5	25728.5	25818
Endothelial differentiation-related factor 1 OS=Homo sapiens OX=9606 GN=EDF1 PE=1 SV=1	10.71	16368.7	6845.26	O60869	7	42.57	0	EDF1_HUMAN	5817	7317	5965	4366.33	5317.33	7088.33	6214	5889.67	8591.5	6102.5	6500.5	8319	6487	6054	6893.5	5197	6993	11447.5	8258	11306.5	10978	13241.7	13074	12137.3	14419	13125.3	13981	16593.7	16955.3	15920.7	10409.7	11137.7	11324.3	9708	10171.7	10496.7	12309	12845	13410.3	21148.7	23080.7
Protein phosphatase 1 regulatory subunit 7 OS=Homo sapiens OX=9606 GN=PPP1R7 PE=1 SV=1	4.65	41678.3	6826.93	Q15435	21	59.17	0	PP1R7_HUMAN	10512.7	9373	9430	27722.3	27965	35628.7	27066	27344	32359.7	18824	17973.3	24160.7	9815.67	10561.3	11807.3	6267	5338.67	8039.33	6338.67	7288.5	8660	37303.7	38384.7	38052	39420	41147	42197.3	38406.7	38337.7	40048.7	25782.3	26848.7	26636.3	12710.3	12438.3	12746.7	13410	14331.3	15115	11091	14682
Calmodulin-like protein 3 OS=Homo sapiens OX=9606 GN=CALML3 PE=1 SV=2	4.1	16947.8	6808.11	P27482	7	42.95	0	CALL3_HUMAN	3759.79	3346.14	3622.55	3819.62	3556.82	3785.73	3420.87	4219.43	4052.33	3639.88	3497.5	2893.5	5146.71	4960.95	5079.58	6149.15	5819.41	5550	6801.18	5810.8	6425.33	20961.5	6608.1	6928.43	20899.3	6811.25	6158.26	32855.5	13345.3	13311.8	24972	7569.85	7422.16	4542.14	4198.43	4002.24	7241.62	6761.71	6506.32	4123.4	4699.67
Dynein light chain 1_ cytoplasmic OS=Homo sapiens OX=9606 GN=DYNLL1 PE=1 SV=1	7.24	10537	6802.72	P63167	4	26.97	0	DYL1_HUMAN	15821.5	16618	15514	21131.3	22432.2	21950.2	21181.8	22609	24962.3	17292.3	18436.1	19078.6	13962.3	13602.8	13832.1	9449.36	9355.91	10453.1	13201.3	12564.8	14243.9	30777.5	27758.6	28347.8	24558.2	22760.6	23080.2	29332.1	27652.4	27505.2	23808	22959.5	25726.5	25613	25577.5	25059.5	19875.5	20139	18249.5	19112	19384.5
Radixin OS=Homo sapiens OX=9606 GN=RDX PE=1 SV=1	5.99	68678.1	6790.52	P35241	38	56.95	0	RADI_HUMAN	30919	29633.3	28819.3	22438.9	20803.3	20928.2	23460.1	24003	25118.5	26988	25720	27553.7	32212.7	30221	28546	9758	9818	9556.33	6516	6278.67	6163.33	21249.7	20427.7	20940.7	19982.3	18772	19160.7	20910.7	21290.3	18739.3	26042.7	26109.7	25663.7	29290.7	28878	28698.7	10870.7	10702.3	10196.3	5730.8	4939.02
SUMO-activating enzyme subunit 2 OS=Homo sapiens OX=9606 GN=UBA2 PE=1 SV=2	4.97	71794	6787.34	Q9UBT2	27	46.25	0	SAE2_HUMAN	21117.7	20798.3	20267.7	37837	36116	40749.7	42141.7	37783.7	44031	46378.7	42688.7	51991.3	19412.3	19904.3	21652.7	16882.7	16171	14707.3	19291.7	18921.3	17871.3	41361.3	40495.3	39766	36550.7	39168	37425	38505.7	33827	35613.7	36174.3	31515.3	31684	17204.7	15862.3	18990	14747	15102	14264	21094.7	19391
Proteasome subunit alpha type-2 OS=Homo sapiens OX=9606 GN=PSMA2 PE=1 SV=2	7.32	26012.7	6778.4	P25787	12	54.7	0	PSA2_HUMAN	40620.7	40852.3	39148.7	21365	29192.3	31102.7	20842	19857	22232	27901.7	38933	36092	36806.7	43030.7	36741.3	48107.3	41321.3	42260	49491.3	51499.7	52225.3	28788.3	27714.3	27727.7	25143	29483	26775	28524.3	30139	29928.7	41756.3	45166	45365.7	52949.3	57340.7	55980.3	81256	84589	86320.3	88143.3	88060.3
Apoptosis regulator BAX OS=Homo sapiens OX=9606 GN=BAX PE=1 SV=1	4.89	21298.5	6751.75	Q07812	10	51.04	0	BAX_HUMAN	14067	15550	16298.7	13645	13228.3	13505	13872.7	13845.3	12654.7	19139.7	17140.3	18276.3	19680	18872.7	18297	18190.7	18411.7	18376	19506.7	19238.7	16971	4010	3936.67	3558.33	3981	3545	3812.67	4055.33	4246.67	3703.33	5455.67	5471.67	4969.33	5576.33	5757	5468.67	8615	5748.5	5608	6197.5	5898.5
Ras-related protein Rab-11B OS=Homo sapiens OX=9606 GN=RAB11B PE=1 SV=4	5.56	24602.6	6727.97	Q15907	11	51.83	0	RB11B_HUMAN	14743.3	18032.7	16002.7	18434	18107.3	14816	18872.3	18852.3	16217.7	27570	24912	21300.3	14403.7	11658.7	13266.7	5021	5639	6355.67	4055	5196.5	5203	14222	15374	12404	13761.7	12575	13123	13567	13089.3	13513.3	20271.3	19796	19552.3	16477	16371.3	16170	5029	5683	6714	6314	6163.67
Chromobox protein homolog 1 OS=Homo sapiens OX=9606 GN=CBX1 PE=1 SV=1	4.66	21531.9	6724.36	P83916	5	27.57	0	CBX1_HUMAN	23369.5	16766.8	16117.8	17936.5	17512.9	17008.1	21874.7	17613.7	16960.9	16695.2	20824.3	20607.5	18865.2	19811.1	21490.5	16032.5	19202.6	17982.9	19094.1	20441.3	21928	13365.5	11845.2	10764.2	17298.2	14178.5	15943.5	16110.4	15102.7	14482.6	20904.4	19786.5	30560.5	27146.5	18598.3	28270	27743	27550	29481	34763	35260
60S ribosomal protein L17 OS=Homo sapiens OX=9606 GN=RPL17 PE=1 SV=3	10.85	21625.2	6669.76	P18621	8	40.22	0	RL17_HUMAN	8934.67	8429.67	7981.33	23441.7	27775.7	24321.7	16046	21690.3	19854.3	14094.3	16889.7	15977.3	13866.3	14937.7	14114.7	6060.67	6646	7264.33	13781	17597.3	14642	13533.3	15460.7	13756.7	19745	15885	17490	14233	14491.3	14505.3	14491	14957.7	12076.3	11824.3	12199	11451	4475.5	4165	4933.5	12285.3	12284.3
Actin-related protein 2/3 complex subunit 5 OS=Homo sapiens OX=9606 GN=ARPC5 PE=1 SV=3	5.31	16377.5	6663.11	O15511	5	37.75	0	ARPC5_HUMAN	9775.67	12094.3	11254.7	8934.67	8759.33	10170	9298.25	8727.82	8959.54	12669	14033.5	12445.3	9622	9258.67	9210.33	9195.39	7457.67	8203.33	5430.46	5924.5	6189.91	13207.7	13716.9	13269.5	14682	11894.9	12688.6	14542.4	14070.8	13692.9	17065.6	14949.7	13394.9	15688.7	14148.3	13784	11393.3	10898.2	9413.78	6702	6015.5
Aspartate--tRNA ligase_ cytoplasmic OS=Homo sapiens OX=9606 GN=DARS PE=1 SV=2	6.13	57535.5	6660.98	P14868	31	64.47	0	SYDC_HUMAN	13495	11728	12207	50546.3	48740	49576	35735.7	34609	35876.3	25021	25773.3	25787.7	11737	12279	11714.3	9264.5	8598.5	6678.33	13689	13029	10901.7	41853.7	41336.3	39226	37916.7	32907.7	35006	20452.7	18887.7	18049	10544.7	10475	10152	8512.67	9221	8510.33	4897.67	4823	4608.33	5168	4551.67
Tyrosine--tRNA ligase_ cytoplasmic OS=Homo sapiens OX=9606 GN=YARS PE=1 SV=4	6.67	59485.7	6655	P54577	35	59.66	0	SYYC_HUMAN	7037.33	6364	6572.67	36677.3	37652	42224	23502.3	23293.3	25025.7	10699.3	10572	10522.3	7146.67	7465.67	8753.67	3848.33	4941.67	6460	6133	5690.67	7075.67	44192.7	41016.7	40218	39704.7	38507.3	37526.3	28427.3	27583	27532	11430.7	10851.7	10693.3	9651.67	9806	10082	9376.33	9282.67	8395.33	8913.67	9424
Electron transfer flavoprotein subunit beta OS=Homo sapiens OX=9606 GN=ETFB PE=1 SV=3	8.25	28071.8	6643.03	P38117	14	50.98	0	ETFB_HUMAN	25872.7	29661.3	30886.7	40953.3	40257	37164.7	40388.7	40052.7	35047.7	49728.7	46190.3	42449	31043.3	28545.3	26639.7	4442	5074.67	5857.33				29642.3	29258.3	30088.7	28291.7	30055.3	30216	29811.3	29713	31586	33651.7	34254.7	34525.7	27211	28678	29868.3	11972	11689.3	11280	5280.67	5293
Keratin_ type I cytoskeletal 13 OS=Homo sapiens OX=9606 GN=KRT13 PE=1 SV=4	4.71	49930.5	6537.35	P13646	25	59.61	0	K1C13_HUMAN	9256.31	6033.05	9940.87	9413.55	8776.54	13879.3	10037.3	10536.5	14214.3	4326.99	6613.21	7835.66	8933.29	9768.57	8599.45	6873.89	8345.02	7596.74	8237.08	7012.34	7131.27	12224.3	10681.7	10567.3	10803.1	10983.2	10380.7	10463.8	10370.7	9904.25	7355.44	7053.62	7076.1	5004.03	4988.51	5032.43	3422.04	3312.83	3381.61	6122.96	6361.69
60S ribosomal protein L31 OS=Homo sapiens OX=9606 GN=RPL31 PE=1 SV=1	11.21	14462.9	6526.12	P62899	5	39.2	0	RL31_HUMAN	16408		10558.5	15040.7	13826.3	11088	11205.3	10900.3	9648.33	7152	18680	4033.5	3096	3483	3619.5				13239	4447	9304	8952.5	7847	7555	11077.3	11502.7	11537.3	10137	9988	10967.3	10250.7	10942	10498	9187.5	5655.5	8560				3631	4148.5
Actin-related protein 2/3 complex subunit 2 OS=Homo sapiens OX=9606 GN=ARPC2 PE=1 SV=1	7.01	34447.1	6523.8	O15144	22	75.33	0	ARPC2_HUMAN	42706.3	45531	42427.3	27307	28107.7	31420.3	29804.7	30648.3	30809.3	44635.7	43396.7	43209.7	41834.3	43081.7	39569.3	21918.3	22202.3	21649	10699.3	11430	10483.3	37759.7	34888.3	35051	34907	34325.7	33236	36056.7	35465.7	33795.3	45788.7	42986.7	46138.3	47348.7	44319.7	46086.3	29174.3	27799.3	30652	8968	9345.33
Hsp90 co-chaperone Cdc37 OS=Homo sapiens OX=9606 GN=CDC37 PE=1 SV=1	4.99	44981.6	6523.51	Q16543	22	45.5	0	CDC37_HUMAN	31317	32658.3	30758.7	42580	40536.3	43960.7	47793.7	46047	53540.3	49628.7	46820.3	53299	38218	38707.7	42175.7	23710.3	21832	23854	20824	20042.3	24031.3	53204	52990.7	52641.7	52781.7	54505.7	51532.7	51526.3	51076.7	51103	56324.7	55633.7	54115	43798	44506	43366.3	35905.3	35381.3	36227.3	28983.3	30511
Keratin_ type I cuticular Ha4 OS=Homo sapiens OX=9606 GN=KRT34 PE=1 SV=2	4.82	50849.3	6521.86	O76011	12	26.83	0	KRT34_HUMAN
BolA-like protein 2 OS=Homo sapiens OX=9606 GN=BOLA2 PE=1 SV=1	6.11	10287.6	6473.99	Q9H3K6	6	55.81	0	BOLA2_HUMAN	12951	9683	8703.67	8184	7156.67	8912	8609	7380.67	8839	7990.67	9340	10499	6821	4728	9390.5	8555.5	8085.5	9681	9934	6684	11787.7	10476.3	9703	11640.7	13910.7	12623.3	12261.7	13957.3	14092	14841	14766.3	13972.3	14158.7	8858	8644	8084.33	9807	10865	10470	14152	12583.7
1_2-dihydroxy-3-keto-5-methylthiopentene dioxygenase OS=Homo sapiens OX=9606 GN=ADI1 PE=1 SV=1	5.32	21555.5	6456.42	Q9BV57	10	63.13	0	MTND_HUMAN	17293.7	38531	25321.5	17403.7	18562	17021	15003.7	16070	15810	18129.7	18350	18414.7	19949	19400.7	20206.7	24047	15974	17101.7	29751.5	27675	20952.7	10987.7	10436.3	10475	11396.7	11865	11496	10894.3	11167	10947.3	12137.3	11953.3	12049.7	10507.3	10880	10815.3	15572.5	16413.5	16428	27631	27897
26S proteasome regulatory subunit 6A OS=Homo sapiens OX=9606 GN=PSMC3 PE=1 SV=3	4.94	49488.8	6436.07	P17980	26	64.24	0	PRS6A_HUMAN	12298	11164	12255	42641	38535	36153.3	36891.7	33116.3	29990	23760	19007.7	19223.3	8830.33	8766.33	7221.33	8866.33	6659.33	6039	9894.67	7616	7101.67	27988.3	27312	25861	31513	26334.3	29487.7	28706	26402.7	25284	18048.3	15157.3	13717	14696.3	13577	13146.3	8791.33	8476.33	8452	6723.33	7787.67
Myosin-10 OS=Homo sapiens OX=9606 GN=MYH10 PE=1 SV=3	5.28	229969	6434.6	P35580	102	50.4	0	MYH10_HUMAN	16382.7	15545	15511.7	31637	31714.3	35637.7	31200.7	30714.3	37021	23450.3	22769.7	20948.3	17897.7	16257	16341.7	16024.7	15348	10508.7	20025.3	20295	19190.3	37918	36094.7	36042.7	39448	39676	39350.7	40557	42347.3	38913	30552.7	30166.3	29533	23123.5	22229.1	21791.6	29620.9	28287.6	25933.7	25911	24845
Beta-enolase OS=Homo sapiens OX=9606 GN=ENO3 PE=1 SV=5	7.67	47329.1	6434.32	P13929	11	32.03	0	ENOB_HUMAN	23446.7	40092.7	32730.6	30419	33682.8	35205.7	26292.6	34138.6	36867.4	46723.4	47191.9	47881.4	19149.9	25144.4	16823	21931.8	28566.7	30055.7	13098.2	17373.1	16130.1	37298.8	36847.9	34205.8	41530.3	46973.3	43793.2	35585	34746.5	31182.1	39362.3	37344	40078.2	18622.9	16769.8	15030.8	23894.7	24418.2	23815.1	10615.4	10730.3
DNA fragmentation factor subunit alpha OS=Homo sapiens OX=9606 GN=DFFA PE=1 SV=1	4.48	36921.1	6379.14	O00273	14	52.57	0	DFFA_HUMAN	25640	27509.7	27402.3	18385.3	17871.3	17065.3	19009.7	18772	17050.3	25461	25155	23032.3	28160.3	29232.7	26675.7	26340.3	28267.3	27242.7	29518	29130	28862	11402.3	10656	9819.33	13408	9977.33	11036	13798.3	12475.7	10690.3	16032.7	14624	14637.7	17134.3	15619	15478.7	14717	15031	14444.7	14042.3	14497.3
Serine/threonine-protein phosphatase 2A catalytic subunit beta isoform OS=Homo sapiens OX=9606 GN=PPP2CB PE=1 SV=1	5.07	36145.4	6339.04	P62714	10	27.83	0	PP2AB_HUMAN	4111.9	3899.89	3572.78	5786.27	5782.58	6334.69	5612.17	5527.76	6103.76	7124.37	6504.52	7260.88	3934.09	3832.56	3539.8	3741.04	3496.29	3535.03				21502.5	21483.7	19180.8	19009.5	13485.3	14792.7	16902.2	16412.2	14672.8	23777.5	22231.8	20414.2	17678	16367.2	14609.2	9593.33	9305.17	9206.33	3668.67	3864.17
Serine/threonine-protein phosphatase 2A catalytic subunit alpha isoform OS=Homo sapiens OX=9606 GN=PPP2CA PE=1 SV=1	5.18	36164.5	6339.04	P67775	11	32.04	0	PP2AA_HUMAN	21025.4	19440.8	19555.9	24329.1	22651.1	25724.6	24496.8	24713.6	26963.2	31607.6	28666.5	32111.5	21862.9	20317.4	19224.5	16843.3	16675.4	16372	13743.3	13351.3	13160.7	21502.5	21483.7	19180.8	19009.5	13485.3	14792.7	16902.2	16412.2	14672.8	23777.5	22231.8	20414.2	17678	16367.2	14609.2	9593.33	9305.17	9206.33	3668.67	3864.17
Clathrin light chain A OS=Homo sapiens OX=9606 GN=CLTA PE=1 SV=1	4.23	27190.8	6337.93	P09496	10	24.19	0	CLCA_HUMAN	69686.3	72905.3	73771.7	49906.3	50062.7	46731.7	48239.3	48139.3	47198	57550.7	59502.3	60979.7	81148.3	78863.7	81798.7	84587.3	81053.7	83223.3	95751.3	99974	105539	29076.3	28364	27984.7	32838.7	31164.7	32182.7	37011.3	36851.7	37545	55279.7	54508	54094.3	53149.3	53672.3	52287.3	81248.3	82850.7	74957.7	99848	99371
60S ribosomal protein L15 OS=Homo sapiens OX=9606 GN=RPL15 PE=1 SV=2	12.11	24260.2	6294.18	P61313	8	39.22	0	RL15_HUMAN	21251.3	21466.7	20678	33349.7	31754.7	27456.7	34236.7	33189.3	30376	31383.3	32581	28457.3	16232.3	16285.7	16232.7	10472	10390.3	9376.33	20135.7	21655.7	18822	8416.33	10857.7	10458.3	12161.3	10385.7	12671.3	11023	10855.7	10858	16045	15903.7	15877.7	12433	12626.7	12265	3705	4627.5	3539	23366.3	21764
Ubiquitin-conjugating enzyme E2 variant 1 OS=Homo sapiens OX=9606 GN=UBE2V1 PE=1 SV=2	8.18	16609.1	6279.28	Q13404	7	40.82	0	UB2V1_HUMAN	23561.7	21523	23897	15574	16982.1	16523	22377	23928.3	20900.3	21697.8	20605.6	18833	25221.7	25653.7	24242	16093	16793	13700.3	6173.17	7683	14114	18735.8	16892	15734.6	16833.1	16142	14445.9	14943.1	16716.8	16386.8	22565	20492	23509.5	27647	27519.7	27171	22136	20262.3	20013.3	19614	18444.7
Methylosome protein 50 OS=Homo sapiens OX=9606 GN=WDR77 PE=1 SV=1	4.84	37465.8	6270.23	Q9BQA1	6	37.43	0	MEP50_HUMAN	21813.5	14577	14622.3	30420.3	28233.7	28443.7	29829.7	25460.3	26442.3	33220.7	29257.7	30804.7	11879.7	11908.7	12679.7	3980	4974.5	3718	7222	4875	4440.67	32057.7	31778.7	31242.3	34551	36512.3	34112	33307.3	35749	33675.3	40631.3	38130.3	39036.7	23100.7	22184.3	21147.7	8883.5	8504	7115.5	9310.5	7257.5
40S ribosomal protein S6 OS=Homo sapiens OX=9606 GN=RPS6 PE=1 SV=1	11.5	28851.8	6266.14	P62753	10	36.14	0	RS6_HUMAN	15687	14231	12839.7	24918.7	25280.3	16500.7	26272.3	25884	21444	18110.7	18275.3	16799.7	21165.3	20545.7	31399.3	44046	44345.7	51775.7	18800.3	17068	16745.3	9752.33	13174	11985	23261.3	17247	19552.7	25093.7	24414.3	21885	24487	24948.3	26418.3	41839	45247.3	46898	13832	13340	14914	25295.3	25857
Flavin reductase (NADPH) OS=Homo sapiens OX=9606 GN=BLVRB PE=1 SV=3	7.51	22233.4	6251.63	P30043	7	50.49	0	BLVRB_HUMAN	3887	3941	3960	27040.7	27326.7	28322.7	23438.3	23645	25263.3	11469.7	10937.7	11624	3325.5	3920	5078	2922	3134	2883.5	3349.5	4132	4077.5	14971	15350	15926.3	16529.7	16485	16960	16728.7	17055.3	16749.7	5362.67	6043	5399.33	4293.5	4030.5	5105.5	4314.5	3020		3237.5	3364
LIM and SH3 domain protein 1 OS=Homo sapiens OX=9606 GN=LASP1 PE=1 SV=2	6.7	30116.4	6246.51	Q14847	12	51.72	0	LASP1_HUMAN	21153	19615.3	19241.7	15049.3	14850	15654.3	14053	14784.3	14911	17459	17803	18487.7	22685.3	22202.7	21291	24509	23336.7	23385.7	28681	28356.3	32913.7	12790.7	14058.7	13144	15331	15519.3	15733	16059.7	16039.7	15393.3	18038	18985.3	18814.3	20000.3	21558	20981.3	26284.7	26090	26284.3	34583.3	37671.7
40S ribosomal protein S4_ X isoform OS=Homo sapiens OX=9606 GN=RPS4X PE=1 SV=2	10.84	29825.9	6236.16	P62701	16	49.05	0	RS4X_HUMAN	10722.7	9196.33	10407	19460.7	20335.3	23113.3	18165	18911	19787.7	13401	12413	13657.3	8804.67	9299.33	10026.7	6422	5561	6556.33	12974.3	13002	12414.3	18398.7	19338.7	19977	20697.7	22610.7	22403.3	21024	21215.7	21976.7	18804	19390.3	20866.3	15747.3	15568.7	15826	5227	6774	4549	21614	21877.7
Thioredoxin-like protein 1 OS=Homo sapiens OX=9606 GN=TXNL1 PE=1 SV=3	4.64	32650.6	6221.78	O43396	12	58.48	0	TXNL1_HUMAN	9724	9599.67	9123.33	27371.7	27307	30853	24494.3	24167.7	26362.3	12890.7	13988.3	14464	10598.7	9972	10742.3	8057.33	8384.67	9395	12097	12076	12047.3	27180.7	26620.3	26063.3	31680.3	27328.3	30720.7	28148.3	27332.3	26054.7	11669.7	12048.7	11522.3	9986	9995.67	9648.33	11267.7	11300	10259.7	11865	10968.7
F-actin-capping protein subunit beta OS=Homo sapiens OX=9606 GN=CAPZB PE=1 SV=4	5.21	31635.7	6181.27	P47756	12	49.46	0	CAPZB_HUMAN	37579	38759	36927	42249.3	44965	41817.7	35291.7	37488.3	36566	43813.7	41556	41983.3	29637.7	29600.3	26388.3	22254.3	20560.7	20926.3	14587	15745	16134.7	46347	49672.7	41917.7	43871	44657.7	43953.3	50914.3	50699	53241	53494.3	49222	53398	47692	48031.3	47274.3	28296.3	28580.3	24664.3	15088.7	14994
Eukaryotic translation initiation factor 3 subunit E OS=Homo sapiens OX=9606 GN=EIF3E PE=1 SV=1	5.65	52620.1	6170.89	P60228	22	51.46	0	EIF3E_HUMAN	5695	8057	7276.5	29390.3	28899.7	29759.7	21639.3	20981.7	20972.3	9840	8642.33	10457	8037.67	8018.67	9165.33	7581	5788	6562	3245	7136	4790	38819.7	36184	36117.3	35175	33110	33428	29321	28293.3	26942.3	9564	9506	8362	11348.7	10738.3	10158.3	4940.67	4362	5179.67	8095.33	7840
Prefoldin subunit 1 OS=Homo sapiens OX=9606 GN=PFDN1 PE=1 SV=2	6.42	14210.5	6157.01	O60925	9	69.67	0	PFD1_HUMAN	17550	39991.7	17615	20003.3	21807	25226.3	30129.3	26441.7	27825.3	47032	26696.7	28095.7	51451.3	34296.7	55458.3	28632.3	12358	12270.7	13625.7	13445.3	13472.3	15345.3	15711.7	15532	17002.3	17821.3	17544	17914	17595	16961.7	17592	32144.3	16912.3	16305	16030.7	32989.7	10805	9674.67	37652.7	14478.3	14176.3
Eukaryotic translation initiation factor 6 OS=Homo sapiens OX=9606 GN=EIF6 PE=1 SV=1	4.37	27112.4	6155.97	P56537	6	40	0	IF6_HUMAN	34986	34012	32707.7	15453.3	15373	15684	18209.3	17821.3	18760	33165.7	30417.3	29922.3	37746.7	35550	33810.7	26272.3	23643	24026.3	10761	11062	12570.7	27266.7	27427.3	27126.7	25032.7	26016.7	26168.3	27576.7	27618.7	26319.3	46382.7	46531.7	45237	45431.3	47524	43618.7	23700.7	22424	21136.3	9092.33	9445.33
Isocitrate dehydrogenase [NADP] cytoplasmic OS=Homo sapiens OX=9606 GN=IDH1 PE=1 SV=2	6.6	46944.5	6146.46	O75874	17	49.52	0	IDHC_HUMAN	31820	33518	32082.3	34733	38023.7	48533.7	33879.7	36495.7	49500.3	44622.7	42633	53737.3	23193.3	23704.7	27251.3	89952	90574	38744	110582	120479	49364.3	27035	26345	25805.7	25241.3	25771.3	25955.3	27112.7	27106.7	27194.7	23726.3	25444.7	25909	18315	18742	18376.3	4738	5234	5501.33	6677.33	6516.67
Alpha-aminoadipic semialdehyde dehydrogenase OS=Homo sapiens OX=9606 GN=ALDH7A1 PE=1 SV=5	7.94	59057.5	6145.38	P49419	24	46.75	0	AL7A1_HUMAN	19011.3	19040.7	18416	41580	43817	43152.3	43103.3	39057.3	42274	40511	39455.7	40925.7	16362	13054.7	13942.7	13140.5	11992.5	7899	19994	22465	9119.33	47790.3	47406.7	47037.3	40579.7	38517.7	40083	40750	43827.3	40669	32808.7	31938.3	29937.7	17479	17011	17650	10580.7	10024.7	10239.7	14140.7	13910
Tryptophan--tRNA ligase_ cytoplasmic OS=Homo sapiens OX=9606 GN=WARS PE=1 SV=2	5.81	53507.7	6138.17	P23381	22	46.07	0	SYWC_HUMAN	27935.7	32295.3	30775.3	27794.7	27408.3	23050.7	30196	29137.3	24085	36928.7	34364.3	32625.7	34121.3	32267.3	28222	32051	31541.7	29659.7	32373.7	31012	28699	33324.7	32785.3	31847.3	30186	24086	28240.7	30826.3	31243	30216	39282.7	39463	36200.7	39962.7	42325.3	38107.7	45020.3	42313.7	32875.3	36183.7	36485.7
Destrin OS=Homo sapiens OX=9606 GN=DSTN PE=1 SV=3	7.84	18962	6125.38	P60981	7	47.27	0	DEST_HUMAN	10050.2	10356.2	9136.96	14904.2	18341.9	22684.3	15295.7	17804.8	20230	19183.5	16067.7	22353.3	10372.9	10583	9031.33	1184.22	1020.48	2807	4489.14	3432.86	5587.33	20170.3	18349.3	18865.3	19796.3	19732	19055.7	23236.7	20803.3	21957.3	20313.3	19854.3	20011.3	14316.3	14213.3	13052.3	5241	5197	3009	6343	7411.67
Deoxyuridine 5'-triphosphate nucleotidohydrolase_ mitochondrial OS=Homo sapiens OX=9606 GN=DUT PE=1 SV=4	9.73	26848.4	6114.35	P33316	8	45.24	0	DUT_HUMAN	4786	5613.67	5335	10474.3	10702.3	10813	9133.67	10124.3	9737	8710	9857.33	9498	6559.33	7107	7324	3568.5	6939.33	8008	4845.67	8263	9035.5	9126	9436.67	8883	13428.7	12514.7	13729.7	13183.3	13006.7	11429.3	6910.33	12211	7127.33	5094.5	5055	4879	4195	3366	3255	5185	5543
40S ribosomal protein S13 OS=Homo sapiens OX=9606 GN=RPS13 PE=1 SV=2	11.18	17222.3	6087.26	P62277	11	56.29	0	RS13_HUMAN	5751.33	5678.67	5503.67	10440.3	11008.7	10895.3	5609.67	7312.33	5203.5	8535	7878.67	6643.67	4065	4578	3204	3221.67	3492.5	4549	7106.33	7734	7069.33	6682.67	9606.33	9505.67	10822.3	12319.3	11139.7	9477.33	9968.33	7700.33	9596.67	10012	10640.3	8113	8748.67	8757.67	4217			9403	9594
Probable ATP-dependent RNA helicase DDX17 OS=Homo sapiens OX=9606 GN=DDX17 PE=1 SV=2	8.25	80956.9	6075.13	Q92841	26	38.68	0	DDX17_HUMAN	5298	2744.83	8108	23987.3	25755.7	24302	21884.7	23978.3	22870.7	11027	10373	11163	4260	4094	6925	4068		4231.67	5282.67	5688	5455.67	26643.3	27331	27150	28270.7	31618.7	30331	25925.3	27556	27018	7301	8355.33	7789.67	17043	15049.3	15948.3	3969	5032.33	4072	9265.67	8888
Glutamate dehydrogenase 1_ mitochondrial OS=Homo sapiens OX=9606 GN=GLUD1 PE=1 SV=2	7.72	61740.1	6058.66	P00367	25	46.77	0	DHE3_HUMAN	22534	23858.3	22842.3	16961.7	16515.3	19527.5	16852.3	16743.7	19026	26210	21539	26322.1	20019.6	20075	24138.9	26462.2	24641.7	27154.8				25211.9	24553.8	24241	21713.5	22408.1	22460.8	26919.4	26659.2	26951.6	53413.3	54665.7	54321.3	33061.7	34462	35584.2	22140.7	21708.7	19681	4185.33	3612.33
Polyadenylate-binding protein 1 OS=Homo sapiens OX=9606 GN=PABPC1 PE=1 SV=2	9.98	70899.1	6038.61	P11940	30	56.13	0	PABP1_HUMAN	2151.04	1143.35	3703.5	23061.6	22676.1	29248.7	17839.3	18493.5	20431.9	12368	11250.4	14630.7	4082.88	3878.2	5199				3326.84	3028.09	3757.27	33560.8	30973.8	29872.9	37606.5	38130.5	37700.8	34454.2	35405.9	34431.4	23379.8	23852.4	23179.9	7895.49	8454.55	8153.93	2449	2156.33	1571.5	1028.03	1018.67
Eukaryotic translation initiation factor 3 subunit A OS=Homo sapiens OX=9606 GN=EIF3A PE=1 SV=1	6.37	166969	6006.93	Q14152	71	43.49	0	EIF3A_HUMAN	48819.3	49499	48035.7	40250	39998.7	38140.3	46976.3	47689.3	41968.7	36502.7	35502.3	33442	41524	43626	43729.7	36583	33773.3	34755	28668.3	29047	29847.3	67902.3	67747.3	65550	60730	59005.7	61376.7	54570	52739	53475.3	53394.7	54808.3	55319.7	80806.3	86344	82906.3	120762	125874	125049	69260	65586
26S proteasome non-ATPase regulatory subunit 3 OS=Homo sapiens OX=9606 GN=PSMD3 PE=1 SV=2	8.76	61091.7	5989.74	O43242	34	62.92	0	PSMD3_HUMAN	10643	10133.7	9107.33	35299	37167	35640.7	33487.7	32921.7	34636.3	21416.3	22036.3	22615	10777.7	10510.3	11010.7	6295.33	5550	5327.33	7477.67	5214	6260.33	32440	33519	31845	31239	29735.7	31488	28598.7	28023.7	27465	16024	17113	16979.3	12496.3	12373.7	12773.3	5764	5900.67	7955	10232.3	9894.33
26S proteasome regulatory subunit 7 OS=Homo sapiens OX=9606 GN=PSMC2 PE=1 SV=3	5.59	49033.1	5986.66	P35998	24	52.66	0	PRS7_HUMAN	6321	6629.33	5117.67	34959.7	31840.7	39059.7	30012.7	27273	35158.7	16026.3	14192	14527.3	21693.7	20103.7	21636.3	3962.67	3869.33	3708.33	5206.33	4673.5	4683.67	32825.7	32051	31227	33234.7	30837.3	33383	32300.3	32100.3	30934.3	12735	12091.7	12108	8490.67	8987.33	8675	6195.5	5184	5218.67	5430	6281.33
Obg-like ATPase 1 OS=Homo sapiens OX=9606 GN=OLA1 PE=1 SV=2	7.85	44971.7	5975.7	Q9NTK5	19	52.53	0	OLA1_HUMAN	8293	7005.67	9628.5	39407.3	43678	50877	37578	41295.3	52337.7	13439.7	14373.3	16475	6170.33	5184	5659.67	18081	16275	7232.67	11122	8619	10106	59816.7	57565	57052	49069.3	42766	46524.3	51111.3	53520	45784	12589.3	10291.3	10424	10714.7	10026	8497.33	11328.7	11341.3	10863.7	9456.33	9816
Inosine-5'-monophosphate dehydrogenase 2 OS=Homo sapiens OX=9606 GN=IMPDH2 PE=1 SV=2	6.49	56261.3	5966.08	P12268	17	31.32	0	IMDH2_HUMAN	14740.7	15793.3	15425	42417.3	42423	41769.3	31493	31648.3	34232.3	21451.3	21581	19468.7	13635	12449.3	12827.7	13405.7	12913	12361.7	16848.3	16109.3	15631.7	62372	62546	61436.3	54692.3	57431.3	55332.7	50317	54837.3	49617.7	29656.7	29881.7	30729.3	25576.7	26113.7	26050	25165.3	26521.3	23420.7	23871	22264.7
Prefoldin subunit 5 OS=Homo sapiens OX=9606 GN=PFDN5 PE=1 SV=2	5.93	17385.2	5950.04	Q99471	7	60.39	0	PFD5_HUMAN	12752.7	12021.3	12285	8862.67	11107	13601.3	11812.7	10269.7	13248.3	13408	14989.7	16731	10097.3	11124	11770	11932.3	11119	11737.7	8129.33	7244.33	8067	18453.3	17439.3	17134	17426.3	19059.3	17732.3	17358.7	16637.7	18844.3	18809.3	17930.7	18209	18286.3	16959.3	15988.3	14631.3	15041	16034.5	13035	13511
RNA-binding protein FUS OS=Homo sapiens OX=9606 GN=FUS PE=1 SV=1	9.57	53654	5930.66	P35637	13	29.09	0	FUS_HUMAN	75802.4	72827.6	75475.7	73438.3	73504.8	84821.2	81865.4	80031.5	92098.7	79981	76103.3	88935	109366	104478	122059	76460.3	70827.2	82830.5	74538.4	79149.8	89667.5	58117.5	58630.2	56493.6	70878.1	66947.9	69356.6	68059.6	69641.4	66919.4	87570.9	84772.1	84646.1	88275	83156.7	86700.7	94806.1	89523.7	80746.9	119217	112195
26S proteasome non-ATPase regulatory subunit 2 OS=Homo sapiens OX=9606 GN=PSMD2 PE=1 SV=3	4.9	100941	5917.26	Q13200	42	51.1	0	PSMD2_HUMAN	10187	9971	10233.3	43883.7	41853.3	39119	38336	37071.3	36809.3	25374	24208.3	22493.3	10270.3	14722.3	14591.7	8103.67	8201.67	7089.67	12122	11500	10369	30942.3	31277	31368	30673.3	29544.3	29218.7	27661	27249.3	25405	16483	16175	15485.3	11149.7	11129.7	11313.3	9320.33	9670	9802	12244.3	11843.7
39S ribosomal protein L12_ mitochondrial OS=Homo sapiens OX=9606 GN=MRPL12 PE=1 SV=2	9.3	21576.3	5879.94	P52815	5	25.25	0	RM12_HUMAN	34264.3	29237	30080.7	21989.3	24759.7	28145.5	20058.3	22203.7	24687.5	25239.3	25308	21776.7	27487.3	26570.7	24566	36376.7	32724.7	31577.7	36375	35347.3	35512.3	21707	23830	23939.3	24473	27796.7	27164	25533.7	26855.7	25816.3	51333.5	43580.7	41319.3	38332.7	35963.3	37897.3	71598	67951	66887.5	78480	75019
Heterogeneous nuclear ribonucleoproteins C1/C2 OS=Homo sapiens OX=9606 GN=HNRNPC PE=1 SV=4	4.76	33727.1	5870.04	P07910	10	30.39	0	HNRPC_HUMAN	9137.33	9121	5637.67	35536.7	34916.3	39104.3	20939.7	21552.3	22808.7	10763.7	10180	11230.7	11570.3	9217	10427.3	8581.67	7422	8363.67	10994	11856.7	10697.3	25340.7	25092.3	24373.7	38640.7	36045.7	38462	24598	22883.3	20976	10927.7	10851.3	10890.7	8822	8247	8809.33	6122.67	5604	5639.33	8938	8714.67
Thioredoxin domain-containing protein 12 OS=Homo sapiens OX=9606 GN=TXNDC12 PE=1 SV=1	5.11	19376.9	5864.93	O95881	8	51.16	0	TXD12_HUMAN	19493.7	15762.3	17586	15294	14304.3	16132.3	16930	15743.3	15958.3	18444	17046.7	16076.3	19457.3	17534	17378	20204.3	18855.7	17820	23562	23014	20791.3	22577	22242.3	22873.3	24661.3	24514	24394.7	26116.3	25124.7	25886.7	23436	21906	23226	20681.7	19142.7	19095	19843	19607.7	18874.7	28601	27959
Trifunctional purine biosynthetic protein adenosine-3 OS=Homo sapiens OX=9606 GN=GART PE=1 SV=1	6.28	109022	5863.08	P22102	41	46.04	0	PUR2_HUMAN	10631.3	9455.67	9953.67	52388	55550.7	55182	39859	41443.7	44653.3	25252	25113.7	27907	7112.33	6927.33	8516.67	4493.33	6232.67	7422.33	6139.67	5903.33	6741.33	52922	55821.3	55490.7	48957.3	50464.7	49026.7	48231.3	48261.7	49868.7	23825.7	24084.3	23703.7	18000	16051.3	17947	10711.3	10781.3	10439.3	9523.33	10136.7
60S acidic ribosomal protein P0 OS=Homo sapiens OX=9606 GN=RPLP0 PE=1 SV=1	5.62	34444.7	5862.46	P05388	16	48.58	0	RLA0_HUMAN	37650.7	36404.3	34189	29559.3	30451.7	33586	29880.7	31704.3	35103.7	37000.7	33893	39360.7	34643.3	34519.7	42530.3	26777	25808	31635.7	31431.7	31173.3	33406.3	31048.3	31433.3	30032.3	28007	27627.3	29262.3	27792.3	26888.3	27182	39230.7	38579.3	40161	39724	39512.3	40192.3	29762.3	31705.7	32025.3	38031	39485.3
Mitochondrial import inner membrane translocase subunit Tim8 A OS=Homo sapiens OX=9606 GN=TIMM8A PE=1 SV=1	4.86	11226.5	5861	O60220	1	11.34	0	TIM8A_HUMAN	23336	27099	26431	13672	13821		15131	16653	15618	23672	22155	23108	19194	16481	17773	26937	32594	30122	36265	40265	35801	13271	12350	12101		12282	13045	14395	12859	12395	18496	17088	17394	17745	19250	16794	10244	9656	9192	5668	5297
Transgelin-3 OS=Homo sapiens OX=9606 GN=TAGLN3 PE=1 SV=2	7.19	22643.8	5859.64	Q9UI15	7	37.69	0	TAGL3_HUMAN	7211.35	7659.24	11580.3	2633.47	2641.22	6824.28	3201.4	3058.36	7528.33	3519.26	3275.67	9201	4790.01	10035.3	11716.3	17778.5	18590.7	25730.1	11265.4	15287.8	15313	3451	3175.84	2900.02	3560.67	3719.33	3462	4438.33	4026.33	3611.67	5721.33	4954	5553	9841.65	9226.02	9405.68				1602.85	1965.56
Glutaredoxin-related protein 5_ mitochondrial OS=Homo sapiens OX=9606 GN=GLRX5 PE=1 SV=2	6.38	16741.9	5859.64	Q86SX6	2	12.74	0	GLRX5_HUMAN	7622	6850	6837	8252	8035	10102	8011	8575	10215	9135	7952	11554	7752	6983	9621	5071	5337	8847	5208	4570	8258	6474	6562	10241	10482	6219	5854	10278	5959	6987.5	7294.5	7826.5	6384	11691	12196	10254	3258		3470
Keratin_ type I cytoskeletal 15 OS=Homo sapiens OX=9606 GN=KRT15 PE=1 SV=3	4.51	49439.9	5846.99	P19012	16	42.98	0	K1C15_HUMAN	28343.6	27205.4	29683	10860.4	11153.5	11722.1	33277.6	35451.1	36280.2	21422.9	21645.5	22290.9	36772.3	37992.7	40321.5	12802.3	12403.4	14121.4	10383.4	10330.7	10387.7	19656.2	20084.7	19375.5	14997.7	15466.7	15491.9	12566	12281.8	12870.1	16940.1	16833.6	17478.9	19579.9	20336.4	19652.2	25912.2	26257.8	25344.1	10329.5	10490.9
NHP2-like protein 1 OS=Homo sapiens OX=9606 GN=SNU13 PE=1 SV=3	8.62	14401.7	5835.97	P55769	4	31.25	0	NH2L1_HUMAN	19718.7	18499.3	17488	16661.5	15882.5	18445.5	13730	15061.5	14974	18416	17510	21081.3	19196	17331.3	20304	14346	13214	15582.7	14384.7	13642	20301.5	25516	26940.5	26857	25498	25665.5	26001	25765.5	25414.5	24450.5	29535.5	27957.5	28594.5	31024.5	31047.5	30478.5	13344.7	13652	12674.7	15564	15826
Thymidylate synthase OS=Homo sapiens OX=9606 GN=TYMS PE=1 SV=3	6.59	36001.2	5833.77	P04818	12	40.89	0	TYSY_HUMAN				4968	5107	5639.67	3422.33	3598.67	9175.33			1985			8290		2601	16492		9777	16314	21270.3	18961.7	17591.7	21781	24251	20615.7	20711.3	20139.3	18039.7	4048	4068	4094.33	3137	2856	2569
NAD(P)H-hydrate epimerase OS=Homo sapiens OX=9606 GN=NAXE PE=1 SV=2	7.63	32016.8	5814.86	Q8NCW5	11	37.15	0	NNRE_HUMAN	40396.7	52672.7	54570	33101.3	35100	37977.7	35167.7	36279.3	40712.3	45958.3	44775	47940.3	55080.7	49191.3	54910.7	59659.3	65275.3	69735.3	50870	50990.7	53391.7	33151	31831.7	30458.7	28749.3	28738.3	29123	32377.7	31885.3	29182.7	40466.3	39632.7	39396	35676.7	34328.3	32324.3	36120	26672	33610	23361	25498
60S ribosomal protein L7 OS=Homo sapiens OX=9606 GN=RPL7 PE=1 SV=1	11.3	29282.9	5769.78	P18124	11	39.52	0	RL7_HUMAN	18529.3	17811.3	17905.3	42434	37118	40970	30921	27546.7	31224	23412	21684.3	23752.7	13935	12884.7	10773.3	10122	9281.33	7523	22597.3	21673	20833.3	18172.7	18764	18775.3	18973	15101.7	19402.3	12482.3	12237.3	11363	15283	15031	13948.3	12205.3	11636.7	10614	8216	6611.5	9387	14384.3	16361.3
DNA replication licensing factor MCM3 OS=Homo sapiens OX=9606 GN=MCM3 PE=1 SV=3	5.41	91608.3	5759.49	P25205	41	54.58	0	MCM3_HUMAN	16337.3	14609.7	12838.3	35780.7	35348	32349	29082	30129.3	27931.7	23522.7	21326.7	19790.7	12239.3	11408.7	11451.7	10616	10093	8442	12821.7	13276	9936	27489.3	27668.7	27594.7	23892	24582.7	25213	20746	20643.3	22071.7	12066	13080	12616.3	9872.33	9829.33	8974.33	8317.33	7922	8140	8018.33	8377.67
26S proteasome non-ATPase regulatory subunit 6 OS=Homo sapiens OX=9606 GN=PSMD6 PE=1 SV=1	5.3	45816.6	5754.99	Q15008	24	55.01	0	PSMD6_HUMAN	6075.67	5605.33	6145	23502	22853.3	24841.3	23012	21909.3	25271	14768.3	13946	16117.3	8503.33	6975.33	9046.33	2877.5	2920	3762.67	3660	4195	6996.33	21297.3	21357.3	20613.3	25029.3	23621	25213.3	23518.3	25344	22761	15107.7	15112	14850.7	9961	9644	9917.67	5024.67	6045	5777.33	7125	7185.67
NEDD8-conjugating enzyme Ubc12 OS=Homo sapiens OX=9606 GN=UBE2M PE=1 SV=1	7.71	21185.1	5754.07	P61081	7	30.6	0	UBC12_HUMAN	26167.3	22131	23748.3	24577.3	23891.7	24334	26387.7	27271	24149.3	23454	25901.7	29159	23993.3	20992	22186.3	22612.3	17884.7	24077.3	24703.7	22022.7	20665.7	25236	23027	23077	22130	19913.7	20850.7	22381	20025.3	20981.3	13973.7	15109.7	14859	6304.33	9435.33	8940	5325.67	5977.67	5103	6333.33	6122.67
Ubiquitin-conjugating enzyme E2 variant 2 OS=Homo sapiens OX=9606 GN=UBE2V2 PE=1 SV=4	8.55	16419.8	5743.1	Q15819	4	24.14	0	UB2V2_HUMAN				6480.63	7066.56	6839.02				8684.89	8247.73	7577.67							6173.17	7683	14114	6180.75	5669.4	5295.33	6111.54	5946.84	5244.81	5869.58	6671.16	6290.2	6957.98	6429.67	7285.86
Histidine triad nucleotide-binding protein 1 OS=Homo sapiens OX=9606 GN=HINT1 PE=1 SV=2	6.52	13916	5713.93	P49773	6	65.87	0	HINT1_HUMAN	20779	25970	18224.7	18589.3	20627.3	19185.7	22001	18037.7	17956.3	26113	23970.3	18943	37543.5	28791.3	24314	24751	23577.5	19677.5	20271	18704.5	31988	20268.3	21268	20774.7	22770.3	23864	21824.3	22521.3	21522.3	7241	21017.7	20554	28457.5	24124	25844.3	25641	34573.5	35684.5	24226	31865	29004
COP9 signalosome complex subunit 4 OS=Homo sapiens OX=9606 GN=COPS4 PE=1 SV=1	5.49	46554	5679.31	Q9BT78	23	65.52	0	CSN4_HUMAN	22612.3	20196.7	20519.7	22565.3	23960.3	17720.7	20398.3	20329.7	17599	22530.7	20764.3	23098	13332	12933.7	14065.7	17200	17029.7	5919.33	17019.3	16405.3	4679.33	15970.3	17659.3	18028	14073.3	15042.7	15401.3	15389	15723	16231.3	19221	18951	20619	13129.3	11089.3	11341.7	5869.67	5576.33	5203	3696	3346.33
Heterogeneous nuclear ribonucleoprotein Q OS=Homo sapiens OX=9606 GN=SYNCRIP PE=1 SV=2	8.86	69830.8	5665.24	O60506	28	46.55	0	HNRPQ_HUMAN	6297.74	37761.3	36480.3	44389.4	29771	49239	41078.2	22458.6	47751.6	44532.1	45102.1	16514.5	34813.3	33354.8	38684	35526.5	35080.9	39758.4	7959.98	23010.4	26702.1	53287.2	55799.6	56211.6	68839	24740.1	25853.3	21237	21434.2	21960	15579.7	16432	16631.7	70602.9	8553.5	8376.49	52746.7	55325.7	52975	39645.1	38918.8
Alpha-endosulfine OS=Homo sapiens OX=9606 GN=ENSA PE=1 SV=1	7.54	13389	5617.47	O43768	8	59.5	0	ENSA_HUMAN	5624	5513	4269	3181.33	3434	2710.33	3697	4488	3648.33	4780	4371.19	4159.33	4294.67	4312	3740.67	3869	3649.5	4291	5169.33	5818	7477.5	10598.3	10257.3	10099.3	13435.3	11716.8	11895.1	16439.2	15685.1	14568.7	16948.4	16529.6	16328.8	18370.7	18449.7	17034.3	15602.3	15112.3	13896	21305.7	19581.5
Septin-11 OS=Homo sapiens OX=9606 GN=SEPTIN11 PE=1 SV=3	6.4	49683.5	5610.44	Q9NVA2	17	44.29	0	SEP11_HUMAN	20148	18525	19686.7	13769.8	13813	15613.7	13577.8	13984.3	19467.3	17607	17979.7	19709.7	22334.3	20649.7	24263.7	18339.8	18009	21091.7	17947.7	17964.7	19618	18887.3	18196.3	17959	18398.3	18504	18711.3	20015.3	19329.3	19251.7	26659	25039.7	24798.3	27351	26458	26207.3	32129.3	31002.7	30710	16004.6	14754.3
Ras-related protein Rab-10 OS=Homo sapiens OX=9606 GN=RAB10 PE=1 SV=1	8.58	22769.1	5607.31	P61026	9	46	0	RAB10_HUMAN	7214	9866	9299.5	8171.33	7504.67	8335.33	12008	12289.7	11337	9040.33	11814	10482.3	10539	11887.7	10735.7	9294.5	7160.67	8589	8503.5	12779	6697.67	7569.33	7754	6966.33	8192	7480	7908.33	8091.67	7552	7697.67	7453.67	7305.33	7709	7830.33	7406.67	7755.33	3383	4325	3522.5	3557	3690.5
Eukaryotic translation initiation factor 3 subunit F OS=Homo sapiens OX=9606 GN=EIF3F PE=1 SV=1	5.1	37678	5590.68	O00303	12	37.82	0	EIF3F_HUMAN				25293.3	21585.3	27950.7	17263	15839.3	20793.3	5826	6172.67	7477.33	2886	3548.33	4255			3354.67		2750	4544.67	33188	35822	34898.7	32618.3	34473.3	34505.7	29973	30118.7	31189.7	7933	8673	8511	7578.33	7460.33	7445	6085.67	5403.33	6764.67	8840.67	8751
Citrate synthase_ mitochondrial OS=Homo sapiens OX=9606 GN=CS PE=1 SV=2	8.47	51940.7	5577.89	O75390	17	41.2	0	CISY_HUMAN	37179.7	38391.3	36118.3	73682.7	72968.3	67473.7	78303	70022.7	72971.7	79540.7	76600	79574.3	44272	41977.3	36564	4404	5067.33	3007.67	3206	7655		72891.7	73426.3	71931.7	60798	55876.7	61783.7	62440	60916.7	59638	64207	60537.7	56195.3	36112.3	34134	31951	8775.33	9286.33	8885.67	9099.67	9035.33
Exportin-1 OS=Homo sapiens OX=9606 GN=XPO1 PE=1 SV=1	5.67	124527	5574.11	O14980	40	38.94	0	XPO1_HUMAN				28191.7	29387.3	29973.7	27862	31038	32089.3	10950.3	11931.3	11353	3800.33	3998.33	4918			2080.5			2612.67	23631	24889.7	22912.3	23257.7	19361	21032.3	20920	20676.3	19821.7	7614	6733	6339.67	6587.67	5575.67	5745	4010	3410	4913	11803.7	9234.33
60S ribosomal protein L22 OS=Homo sapiens OX=9606 GN=RPL22 PE=1 SV=2	9.76	14844	5562.76	P35268	4	35.16	0	RL22_HUMAN	26704	24120	24435	34607	33121	33653.7	31176	31211.7	31956.3	24076.3	26520.3	29799	18362.7	18474	19902.3	14497.5	13497.5	11124.3	20757	20653.5	21069	24887.7	27348.7	27850.3	29227.3	31554.7	31699	29441	28308	30223.3	33241	36955	36857.3	29458.7	29953.3	30663.3	21685	14481.3	13932.7	28515.5	20018.7
DNA replication licensing factor MCM7 OS=Homo sapiens OX=9606 GN=MCM7 PE=1 SV=4	6.06	81935.4	5554.89	P33993	43	57.58	0	MCM7_HUMAN	16228	8909	14894	25173.7	26421.3	37060	24586	24712	34244	11774	11381.3	21019.3	8247.67	7849.67	16317.7	6373.5	10104	10318	3757	5761	11888.7	41333.7	39186.7	36270.3	36491	33542.7	32704	27585.7	26891	24926.7	13874.7	13894	13461.3	18580.7	17760.7	17377.3	25048.3	28630.7	26060	22378.7	19031
Nucleosome assembly protein 1-like 4 OS=Homo sapiens OX=9606 GN=NAP1L4 PE=1 SV=1	4.4	42994.6	5539.24	Q99733	13	39.2	0	NP1L4_HUMAN	12365.2	13385.9	11553.1	24769.3	25273.6	14563.2	27586.1	26783.3	21535.3	26059.3	24211.8	14760.2	12942.8	11177.9	9559.33	9150.16	7003.33	4425.36	9061.02	12762.6	10177.3	24439.3	23806.7	22415.7	15291.1	21684.7	20387.3	14162.7	22705.7	21674.3	14504.7	23431	22442	11236.5	11554.5	12949	8788.67	8875	8314.67	8560.28	12264.5
Replication protein A 14 kDa subunit OS=Homo sapiens OX=9606 GN=RPA3 PE=1 SV=1	4.75	13682.8	5501.65	P35244	3	35.54	0	RFA3_HUMAN	27136	24294	23368.7	30146.7	31179.5	28647.3	28139	29543.3	27046.7	33063	31872.5	29003	31312	30954.3	27633	12971	10946.5	10673	11016	10371.5	7446	18573.7	19600.7	18865.3	23190	21109	22236	23154.7	22413.7	20323.3	16761.3	15331.7	15745.7	26423	25850	23253.5	9611	9395	8669	10470	11458
Lysozyme C OS=Homo sapiens OX=9606 GN=LYZ PE=1 SV=1	9.34	16993.3	5488.41	P61626	4	21.62	0	LYSC_HUMAN																						1718	1843	1391	2262	1668		3091.5	2955.5	3088	3742	3681	2694	3053		3680				3545	2222
Phosphoglucomutase-1 OS=Homo sapiens OX=9606 GN=PGM1 PE=1 SV=3	6.33	61734.4	5479.72	P36871	29	54.09	0	PGM1_HUMAN	20701.3	21725.3	19672.7	20239.3	19201.3	24675	20842.3	19497	23517.3	25589	24268	28622	18778	18869.7	20023	10351	9907.67	14373.3	3962	5275	5620.67	22985	22957.7	22449	21920.7	20416.7	21767	23028.7	22743.3	21843.3	30759.7	28845	29435.3	31901	30509.7	30960.3	23698.3	21963	21731.7	11479.3	10404.7
26S proteasome regulatory subunit 10B OS=Homo sapiens OX=9606 GN=PSMC6 PE=1 SV=1	7.29	44458.2	5461.34	P62333	17	50.64	0	PRS10_HUMAN	4281.33	4565.33	4884.33	26223.3	26737.7	23577	23038.3	23371.7	20723.7	14254	14683.7	12227	6083.33	5681.33	5634	3253	3249.33	3724.67	3371	4513.5	3277.33	19496	17631.3	16694.3	19751.7	16039.3	18369.7	18023	15888.7	13845.3	7584.67	8390.33	7075	5602.67	5745.67	4658.33	2956.5	3394.5	3232.5	3536	3612
Putative high mobility group protein B1-like 1 OS=Homo sapiens OX=9606 GN=HMGB1P1 PE=5 SV=1	5.85	24409.1	5455.38	B2RPK0	8	33.65	0	HGB1A_HUMAN	50532.1	44536.8	46753.9	36474.1	33942.6	28715.3	41538.2	37670.8	29898	43797	43078.8	34107.3	56915.7	53074.5	40267.3	52578.4	46415.1	33713	64268.7	66326.1	47917.3	31287.7	31521	30090.7	37460.3	38925.3	37748.7	43774	44604	41411.3	51878.3	45203.7	47554.3	41854.3	44972	42239	57947.5	59929	58365	74127.5	73967
Cytochrome c oxidase assembly factor 6 homolog OS=Homo sapiens OX=9606 GN=COA6 PE=1 SV=1	8.28	14458.3	5444.77	Q5JTJ3	1	9.6	0	COA6_HUMAN						1292																1324		1229		1296
26S proteasome non-ATPase regulatory subunit 13 OS=Homo sapiens OX=9606 GN=PSMD13 PE=1 SV=2	5.45	43230.7	5430.9	Q9UNM6	19	60.37	0	PSD13_HUMAN	6383.67	6342	6245.33	39049.7	37623	32165	37160.3	36749.7	32471.7	19702.7	18102.3	17368.7	7360.67	6946.67	8035	3808.67	4314.33	6230	5459	5832	5806.33	44125.7	46789.7	46614	38439.7	39307	41040	39757.3	40992.3	40941	16103	16704	14419.7	12966.3	12531.3	12019.7	9535	10533.3	10465.7	8291.33	8838.67
BTB/POZ domain-containing protein KCTD12 OS=Homo sapiens OX=9606 GN=KCTD12 PE=1 SV=1	5.33	35986	5423.5	Q96CX2	14	54.46	0	KCD12_HUMAN	14278	17626	16171	12756	12761	11367.7	13788.3	12911.3	12876.3	17188.7	14365.7	15054	16856.7	15428.3	16871.7	18982.7	18169	19695	17987.7	17076	14725.3	15419.3	15414.7	14766.3	13162.3	12357.3	13229.3	15225.7	15694.3	13821.7	18696.3	17769	17023.3	16163.3	16365.7	15679	17394.7	16331.7	14225	11594.7	11144.7
Proteasome subunit beta type-6 OS=Homo sapiens OX=9606 GN=PSMB6 PE=1 SV=4	4.61	25585.9	5416.81	P28072	8	54.39	0	PSB6_HUMAN	93368	91074	94498.3	55301	56788.7	53898.7	57930.7	59582.7	63984.7	74576.3	76725	85183.3	89484.7	87762.7	87396.3	111349	105820	113958	113557	119723	130242	56470	55494	56444.3	60015	61864.3	61778.7	61520.7	66803.3	63735	86600	87104	90143.7	95713.7	96041.3	94631.7	121773	121276	119890	131401	131076
Serine/arginine-rich splicing factor 8 OS=Homo sapiens OX=9606 GN=SRSF8 PE=1 SV=1	12.2	32401.6	5391.63	Q9BRL6	5	17.73	0	SRSF8_HUMAN				4494	4590.87	4583.82										3515.47	4328.47	4333.6				6284.4	6026.16	6449.88	5588.01	5667.39	3482.15										27239.5	28095.1	27449
Far upstream element-binding protein 1 OS=Homo sapiens OX=9606 GN=FUBP1 PE=1 SV=3	7.45	67731.6	5390.56	Q96AE4	30	53.26	0	FUBP1_HUMAN	60003	61342.7	59836.7	40662.7	39996	46108.3	42340	39019.7	43859	47906.3	46814	48642.7	63972	62296.3	65079.8	78414.7	74582.3	72529.3	75647.3	81353.7	88992	36885.3	35564.3	36480.7	39854.7	38595.3	37679.3	38976.3	38186	37785.3	52111	52900	52691	61758	62241.7	61010	89079.3	87567.3	89391	93239.7	90071.7
Phosphoribosyl pyrophosphate synthase-associated protein 2 OS=Homo sapiens OX=9606 GN=PRPSAP2 PE=1 SV=1	7.22	41325	5387.15	O60256	16	49.05	0	KPRB_HUMAN	10695.8	11197.9	10755.2	9961	9495.34	10072.3	10170.7	10353	10326	13860.8	13444.4	13449.3	13309	14855.6	14843.7	5124	4132.67	5808.67			1443.5	6154.33	6246	6166.67	7134.6	6822.67	7230.54	6891	7079.67	6759.67	7940.67	8235.33	7902	6793.48	6928.36	7101.84	3339.94	3383.86	3342.27	1465.5	1792.5
Profilin-2 OS=Homo sapiens OX=9606 GN=PFN2 PE=1 SV=3	6.79	15388.4	5379.24	P35080	6	53.57	0	PROF2_HUMAN	6315	5652	5405	15596	15661.3	16476.3	12838	12888.3	14379.3	11068.7	9776.67	11235.3	6395	7337	5248.5	28590	25339	25921.5			5018	15993.3	15775	15137.3	15805	16516.7	16048.3	16424.3	16998.7	15928.7	10296	10327.3	10782.3	23206	23233	22546	4693	4427	4431.5	4780.5	5742.5
Elongin-B OS=Homo sapiens OX=9606 GN=ELOB PE=1 SV=1	4.53	13246.9	5354.53	Q15370	5	25.42	0	ELOB_HUMAN	21549.3	21148.3	21228.3	25465.7	24212.7	20175.3	29234.3	26968	30646.3	33795	32941	40459.7	21710.7	21269.7	17369	14751	12835	13449.5	14249.7	17195	20100.5	18567	18678.7	9782	17919	21398	12649.3	20853.7	21217.3	30836.3	33392.3	36766	36797.7	25685.3	25507.3	26406	25736	25589	25850	29792.3	28640
Aldo-keto reductase family 1 member B1 OS=Homo sapiens OX=9606 GN=AKR1B1 PE=1 SV=3	6.59	36252.6	5329.74	P15121	12	46.84	0	ALDR_HUMAN	25767.3	24298	26339.7	39427	42012	39328	36367.7	39930	38380.3	49561.4	57300.8	53976.8	19824	20497.7	19442.7	3674	3521		3955.5	4192	5213	39878.5	39753.5	40306.2	38638.9	40999.6	38909.8	40770.2	40962.2	40638	55720.9	54371.6	58897.3	34983.3	34873.2	36323	3542.46	5502.41	3656	3302.43	4104.23
Ribonucleoside-diphosphate reductase subunit M2 OS=Homo sapiens OX=9606 GN=RRM2 PE=1 SV=1	5.12	45162.9	5326.87	P31350	19	52.96	0	RIR2_HUMAN	19366.7	18376	17403	13459	14186.7	14911.3	16949.7	17373	18295.7	19803.3	18574.3	19213.7	22698.3	21642.3	22292.3	21574	19809.7	22515.7	24041.7	20556.7	25132	26811	24816	25227.3	25195.7	23500	22542	23382	24662.7	22154	29291	27988	27524.3	31938	30919.7	30180	32132.3	27587	26857	21685	20338.3
3-ketoacyl-CoA thiolase_ mitochondrial OS=Homo sapiens OX=9606 GN=ACAA2 PE=1 SV=2	8.08	42380.4	5316.19	P42765	16	47.36	0	THIM_HUMAN	41923.3	39214.7	39471	22504.7	22824.3	19154.3	20944.7	20788.7	17396.3	27518	26373.3	25960	32180	32322	36095.3	50432.3	47905	50739	41331.3	40562.3	43231.7	23061	22200.3	21314.3	15736	14805	15140.7	15656.3	15412.3	14566	32579	30840	24741.7	37469	36457	36684.7	57208.7	55735.7	53454.7	41870.3	42709.7
High mobility group protein B2 OS=Homo sapiens OX=9606 GN=HMGB2 PE=1 SV=2	7.96	24204.9	5315.3	P26583	9	29.67	0	HMGB2_HUMAN	42190	40336.5	40103	28429.7	28908	29544	30602.3	30559.7	31833	31415	31459.7	37733.7	58961	58567	42598	55558	53385	41840	74545	72883.5	60333.3	32040.3	30253.3	30454.7	34020	34614	33943.7	39369	40088	38208	35030	35855.7	33626	34729.7	31365	34793.7	40842	41888.7	39638.3	46580.7	47705
Small nuclear ribonucleoprotein Sm D2 OS=Homo sapiens OX=9606 GN=SNRPD2 PE=1 SV=1	10.65	13641	5309.2	P62316	6	44.92	0	SMD2_HUMAN	6966.67	6992.67	6405.33	8942.33	8857	11035	8948.67	9245	9985.67	10046	8418.67	9949	7018.67	7563	7083	10175.7	10302.3	11103.7	13864.3	15312.7	16664.3	15542.3	15260.7	15551.3	17071.7	17713.7	17124	18903.7	19255.3	19735.3	16471.7	16024	16976.3	13558.3	14787	13952.7	14055.3	14727	11710	23145.3	21725
Serine/arginine-rich splicing factor 3 OS=Homo sapiens OX=9606 GN=SRSF3 PE=1 SV=1	12.13	19557.7	5301.16	P84103	8	42.07	0	SRSF3_HUMAN	13007.1	13831.8	11643.1	10710.2	14815.2	17941.6	12029.8	14340.9	13839.1	12614.3	12797	13234.3	12366.8	12957.9	9970.43	13908.6	13952	14804.3	22292.7	23856.5	25488	19384.1	19331.6	19891.8	24566.2	25089.5	26598.1	22650.3	22186.1	21454.2	21474.5	22123.5	20939.3	19071.5	18878	19592	32245	33261	31772.5	34287.7	31482.3
Tubulin beta-8 chain OS=Homo sapiens OX=9606 GN=TUBB8 PE=1 SV=2	4.6	50289.4	5292.18	Q3ZCM7	10	25.68	0	TBB8_HUMAN	7711.81	6574.23	6770.84	7838.37	5892.27	7330.76	6839.82	7297.83	6997.66	8256.44	7935.84	9463.4	4373.69	3828.29	4252.05	2653.1	2839.31	3994.78				20956.6	22011.9	21483.1	6875.64	5550.03	6005.79	6096.66	6820.88	3951.62	5610.51	5384.99	2787.82	5593.67	3970.36	2071.34	8644.12	4397.91	2596.37	1258.37	2786.32
Methylosome subunit pICln OS=Homo sapiens OX=9606 GN=CLNS1A PE=1 SV=1	3.77	26386.4	5281.93	P54105	6	35.86	0	ICLN_HUMAN	17917	30099	27548.5	29022.7	30928	31756.3	25583.7	28959.7	32232.3	34528	36036.7	40250.3	36335	28228.7	30833.3	21580	30991.5	22106	30766	36157.5	26797.7	27024	26375	21333.3	27997.3	21731.7	25117.7	30640.3	26344	19787.3	25808.7	22396.3	19863	18084	15120.3	13739.3	22915	21631	22096	18595	9429.5
Actin-related protein 2/3 complex subunit 3 OS=Homo sapiens OX=9606 GN=ARPC3 PE=1 SV=3	8.83	20774.8	5279.49	O15145	8	36.52	0	ARPC3_HUMAN	13591	13132	12353	17336.3	16233	15604.7	14521.7	16681.7	16470.7	18738.7	19794.3	19572.3	15627.7	21037.3	19052.3	8350	7452.5	6061		3703	4634	20557.7	20544.3	19465	18123	16834.7	18142	17776.7	16945	15937.7	18044.7	17829.3	19955.3	18501	18419.3	17077.3	7814.5	3041	5919	7617	6648
Protein phosphatase 1G OS=Homo sapiens OX=9606 GN=PPM1G PE=1 SV=1	4.07	59956.1	5270.94	O15355	20	37	0	PPM1G_HUMAN	17677.7	18169.3	15801.3	45619.7	46077.3	46498	25280	23434.7	25329.3	16451	16287.3	19224.3	21091.3	19941.7	23121.3	20534.7	18572.7	21437	26583	27009.7	26496.7	48534.7	43179.3	42576.7	43094	34061.3	38436	29213.7	29226	21875	12401.3	12319.3	13549.7	15246	14690.7	14319.7	19015.3	17543	17062.7	20796.7	20034
Glucosamine-6-phosphate isomerase 1 OS=Homo sapiens OX=9606 GN=GNPDA1 PE=1 SV=1	6.49	32839.7	5270.74	P46926	14	61.25	0	GNPI1_HUMAN	33817.3	32068.7	32245.3	21179.6	17297.3	21689.9	20663.1	17940.7	28358.4	27656.7	24788.7	22879	30057	29004.3	27040.7	46467.3	41190.3	35687.4	41453.7	42331	40745.3	40828.4	42769.4	26966	22140.1	12517.3	31320.9	25566.2	32143.5	40995.2	30250.9	37971.7	23621.3	26078.3	26537.1	31829.4	37615	34068.3	33125.3	26480.3	26091
N(G)_N(G)-dimethylarginine dimethylaminohydrolase 1 OS=Homo sapiens OX=9606 GN=DDAH1 PE=1 SV=3	5.45	31464	5254.4	O94760	15	49.82	0	DDAH1_HUMAN	44143.3	46010.3	43198.3	37688	31558.3	36739.3	39522.3	34222.3	49858.3	44856.3	47337	49302.7	32919.3	32494	49390.3	16784.7	15839.3	16077.3	12543	11606	12722.3	29834.3	29448.7	31782.7	36013	21674	24122	38647.7	31344.3	35967.7	54353	47721.3	45577.7	49961	48882.3	45264	24250	24239	24430.7	19460	24205.7
Eukaryotic translation initiation factor 3 subunit G OS=Homo sapiens OX=9606 GN=EIF3G PE=1 SV=2	5.78	35896.2	5233.64	O75821	14	40.94	0	EIF3G_HUMAN	12699.3	12665.7	12345	36335	37817	41306.7	24757.3	26763	30103	17216.7	17060.3	20204.7	14523.7	14188.7	15731.7	11150.7	10884.7	14131	13237	13933.7	16620	46463	47882	46330	55510.7	52849.3	55768.7	48216	50334.7	48110.7	30953.3	32760.3	34038.3	27088	28315	28990	28809	27515.7	27789	30698.7	30637.7
Dihydrolipoyllysine-residue succinyltransferase component of 2-oxoglutarate dehydrogenase complex_ mitochondrial OS=Homo sapiens OX=9606 GN=DLST PE=1 SV=4	9.38	49097.6	5228.01	P36957	16	37.97	0	ODO2_HUMAN	54962	44823.7	46090.7	27358.3	25182.3	22892.7	27791.3	26036.7	21416.7	33325.7	23947.7	26373	43623	39348.7	35224	75837.3	62994	64229.3	73528	69139.7	68538.3	19770.3	16922.7	16997.3	14779.7	20781	14494	14545	17827.7	17794.7	31925	34086.7	35722.3	41481.7	40012.7	39507	49997.7	47766	38564.3	50504.3	47140.7
Gamma-glutamylcyclotransferase OS=Homo sapiens OX=9606 GN=GGCT PE=1 SV=1	4.88	21235.9	5188.64	O75223	10	60.11	0	GGCT_HUMAN	34042	33300	32633.7	28345.3	30075.3	29534.3	29036.7	32233.3	32161.7	43085.3	40488	43486.3	36957.7	39395.3	41367.3	15896.7	15382.3	16021.3	12627.3	13018.3	12485.7	22674	24159.3	25661.3	24223	27159.3	26124.3	28142.7	27872	29826.3	35864.3	37585.3	39805.7	35815.3	37039.3	37426.3	14759.3	13925	14401.7	10466.7	10894.7
Small nuclear ribonucleoprotein E OS=Homo sapiens OX=9606 GN=SNRPE PE=1 SV=1	9.87	10860.7	5165.32	P62304	3	38.04	0	RUXE_HUMAN	28438.5	29312.5	29048	29245	20961	23891.5	20089.5	19576	16352	37024	31869.5	26782	23590	21334.5	23523	33132.5	31886.5	31895.5	30172	27505	26714.5	52220	47379.5	45731	46400.5	38171	48638	52734	53913	49544	65318	64883	55885	41535	34361.5	30341.5	21291.5	35042	37236	26680	24418
DNA replication licensing factor MCM6 OS=Homo sapiens OX=9606 GN=MCM6 PE=1 SV=1	5.13	93858.9	5152.63	Q14566	41	47.14	0	MCM6_HUMAN	9925.67	10206.7	9241.67	30551.3	32062.7	36334	30663.3	32815	37321	15619	15019	17419.7	11998.3	13334	14429.7	8753.67	9974.67	10346	11961	12525.3	13279.3	27089.7	27706	26652.7	27033	26168.7	26935.3	26515.3	26192.3	25132	10992	10632	9361.33	8273	8270.33	8275	7280	7538	7366.67	7513.33	7603.33
Ras-related protein Rab-8A OS=Homo sapiens OX=9606 GN=RAB8A PE=1 SV=1	9.55	23839.3	5144.9	P61006	7	29.47	0	RAB8A_HUMAN	3648			7727.33	7246	7211.64	7703	7703.67	6859.27	7648.67	7425.33	6595.65	3734.22	3984.58	3170.66							7553.36	7323.06	7750.04	7234.13	6383.71	6816.9	6687.48	6509.35	5656.33	4709.53	4296.04	4426.14	1598.95	2054.22	1565.14					2260
Growth factor receptor-bound protein 2 OS=Homo sapiens OX=9606 GN=GRB2 PE=1 SV=1	5.89	25320.4	5143.32	P62993	11	45.16	0	GRB2_HUMAN	13471.3	14084.7	12334	17453.3	18414.3	18218	16224.3	19083	15045.3	21870.7	19033	17239.3	12770	13509.3	10380.3	10669	11475.3	10478.7	10490.3	11380.3	9343.33	22164.7	25126.3	22887	25095.3	21096.7	22742.3	26351.7	24004.7	24062.3	26315.7	26262.3	24918	18898.3	19769.3	18069.3	16237.7	16710	16496	17390.7	16542.3
26S proteasome regulatory subunit 4 OS=Homo sapiens OX=9606 GN=PSMC1 PE=1 SV=1	5.82	49355.7	5140.5	P62191	17	43.64	0	PRS4_HUMAN	5613	5617.5	5577	24216	26095.7	26897.7	16296.3	17773	17870.3	10742.3	10988.3	11190.7	3461	4977.5	4401.67	6690	4037	5755	4565	4469	4205.5	17984.7	17726.3	18083.3	19304	19387.3	19244	15104.7	15476.3	15438.7	8067.33	8261.33	8391.67	6996.33	7645.33	7523.67	4019.67	3896	4365	5547	5868
Protein HEXIM1 OS=Homo sapiens OX=9606 GN=HEXIM1 PE=1 SV=1	4.64	40908.7	5139.07	O94992	9	37.6	0	HEXI1_HUMAN	16973	17175.3	16193.7	11832.7	11907.7	12919.7	11773	11605.7	13376.3	14284	13654.7	15777.7	18362	17665.7	18868.3	23337.3	22055.7	24369.7	26855	26905	30727	25913.3	25614.3	22824.3	28618.3	24035.3	26774.3	28754.7	27863.3	25203.3	35517.3	33840.7	32086.3	39554.7	39629.3	35562	46167.3	44322	39475	49538.3	46166
Asparagine--tRNA ligase_ cytoplasmic OS=Homo sapiens OX=9606 GN=NARS1 PE=1 SV=1	5.87	63798.4	5113.83	O43776	28	41.24	0	SYNC_HUMAN	6565	5030	5646	31793	32453.7	31083.7	32681.3	35362	34651.7	15304.3	15777	14277.3	3972	5174.67	5372.67	7087	4659.5	4903.67	3134	3453.33	4900	35770.7	32857	31074.3	29479	30498	28415	33577.7	32249.7	30270	9262	9343	8965.67	8674.33	9062.67	8836.33	5260	4412.67	5182.5	5599.33	7745
cAMP-regulated phosphoprotein 19 OS=Homo sapiens OX=9606 GN=ARPP19 PE=1 SV=2	9.73	12323	5112.16	P56211	4	44.64	0	ARP19_HUMAN				3786	3026	3409	4348		4069.42		2035.44	2847										6967.74	8667.62	8621.56	10316.1	9658.25	9850.34	9875.65	9236.4	8806.93	5817.43	4644.09	5342.37							11334.5	10694.7
Ras-related protein Rab-8B OS=Homo sapiens OX=9606 GN=RAB8B PE=1 SV=2	9.55	23755.2	5104.68	Q92930	5	22.22	0	RAB8B_HUMAN				1782.88	1672.12	2260.36	1769.45	1636.16	2321.4	1430.37	1668.54	848.338	1243.35	1459.25	1885.17			2537			3266	2663.31	2300.61	2886.62	2301.21	1779.59	2523.1	2602.85	2588.99	2517.67	2668.81	3123.29	3311.86	3211.01	3408.78	3439.98		2478	2315	2972	3773
NSFL1 cofactor p47 OS=Homo sapiens OX=9606 GN=NSFL1C PE=1 SV=2	4.81	40572.9	5104.32	Q9UNZ2	16	54.05	0	NSF1C_HUMAN	15081.3	14325.3	14585	20993	18673.7	23144.3	21530.3	18129	23408.3	20256.3	18519.3	22584.7	13846	13057	16574.7	12973	12254	14543.3	15110	13872.7	16508	22590	23313.7	24027	25736.3	26487.3	25299	25373.3	25545	26411.7	26101.3	25146.3	23956.3	18811.3	19447.3	17999	21257.7	21666	20688.3	25128.3	23085.7
Heterogeneous nuclear ribonucleoprotein R OS=Homo sapiens OX=9606 GN=HNRNPR PE=1 SV=1	8.24	71228.3	5103.23	O43390	25	40.92	0	HNRPR_HUMAN	1525.39	2438.32	1357.36	33140.9	32187	29383.4	20470.8	21234.4	20306.1	7853.88	7911.56	6847.32	4985.97	5097.56	5636.82	1773.74	3356.56	2191.09	4429.35	6189.56	2866.78	21220.8	23076.7	22468.4	30291.8	30422.3	32062	25046.4	24094	23319.2	6864.34	7323.06	5495.41	1166.2	1669.17	1145.77				894.41	1328.16
60S ribosomal protein L38 OS=Homo sapiens OX=9606 GN=RPL38 PE=1 SV=2	10.81	8274.93	5098.02	P63173	5	48.57	0	RL38_HUMAN				2231	2524	3209	2644	2417	2350		2014		2134		2327							4508.67	4404.33	4474.33	4368.67	4171.33	4666.67	4793.67	4660.33	3914.33	2839.67	2854.67	3114	4240	3641	4222
Isochorismatase domain-containing protein 1 OS=Homo sapiens OX=9606 GN=ISOC1 PE=1 SV=3	7.19	32521.9	5096.39	Q96CN7	14	50	0	ISOC1_HUMAN	22783.7	23293	25637	16712	14400.7	13492.3	15976.3	12781.3	12826.3	18492.7	23322	16618.3	24678	22685	15735.3			4188			2740.5	16698.7	16267.7	15467.7	16221.7	15327	15556	18261	17701	16725.7	22627	22260	23641	24677.3	23702	23865.3		4389	3394.5
Keratin_ type II cytoskeletal 75 OS=Homo sapiens OX=9606 GN=KRT75 PE=1 SV=2	7.73	59845.6	5085.18	O95678	16	23.96	0	K2C75_HUMAN	24464.1	25702.2	24502.1	11664.2	10734.4	16613.7	22545.9	24746.2	26109.3	17694.1	17195.7	17777.8	29537.6	29953.4	28070.4	29437.5	29239.1	30161.4	21669.7	21740.9	22829.7	11894.7	11805	11794.8	11093.4	10588.6	11474.8	15148.3	14281.1	14701.9	8962.04	8810.89	8614.68	8466.38	9005.4	8657.68	6592.55	6277	6522.66	4334.45	5836.23
Heat shock 70 kDa protein 4L OS=Homo sapiens OX=9606 GN=HSPA4L PE=1 SV=3	5.53	95539.2	5082.78	O95757	39	52.56	0	HS74L_HUMAN	3759.33	4900	5056	21888.7	20702	19309.7	20500.3	20258	17604	8234	7888.67	7952	3044.67	3540.33	4910.33	3592.5	4195	3592.33	2978	4102.5	3220.67	15358	16042	15615.3	14020.7	13611.3	13737.7	14698.7	15907	13561.7	5127	6079.33	4975	4107.33	4773	4394	2829	3624.67	3224	4940	5381
Spermidine synthase OS=Homo sapiens OX=9606 GN=SRM PE=1 SV=1	5.16	34395	5078.71	P19623	9	30.13	0	SPEE_HUMAN	10155.5	11259	11599	49738.3	51899.7	45875	43263.3	42507.7	39533.7	28441.7	25519	21780.3	3937.5	5983	3450.33	4644.5	3803	4352.67	6495.5	4380	5510	50276	52794.3	53372	48579	50673	52343	48226	48165.3	51315	16709.3	16544.7	16785	9996.67	10280.3	10054	7586	6404.5	7218.33	8345	8541.5
Glyoxylate reductase/hydroxypyruvate reductase OS=Homo sapiens OX=9606 GN=GRHPR PE=1 SV=1	7.16	36067.5	5067.61	Q9UBQ7	12	41.77	0	GRHPR_HUMAN	6466.67	6735	7560	19070	18548.7	19074.7	19135	18298.3	20575.7	22475	21295.3	23559.7	7203.67	7111.67	7554	4812.5	5050	5415.33			3682.67	13605.7	13176.3	13228.3	13282.7	12533.3	12784	13235.3	12722.3	11848.3	12359	11739.3	11807	9092	9553	8825	3082	3158.5	2940	4623.5	4575
Alpha-centractin OS=Homo sapiens OX=9606 GN=ACTR1A PE=1 SV=1	6.22	42727.9	5065.96	P61163	17	50.27	0	ACTZ_HUMAN	12839.9	25215	25232.6	21697	19861.1	22709.8	20876	20391	24043.3	24485.3	22969.3	25724.7	26617.6	24120.7	28977.3	11090	13321	14371.3	6490.04	7455	7904.67	21345.6	23782.8	21089.9	21348	20309.3	21521	21541.3	20406	20675	24415.7	24659.5	25165.6	21597.8	20599.5	21001.6	7495.33	7712.34	7408.66
Galectin-3-binding protein OS=Homo sapiens OX=9606 GN=LGALS3BP PE=1 SV=1	4.95	66243.5	5056.1	Q08380	19	33.5	0	LG3BP_HUMAN	67286	76520	77526.7	45795.7	44261.3	46599.3	51492	48405	50825.7	69948.3	58514.3	68760	85667	82762.7	88595.7	96729.3	89694.3	104690	109140	112642	118195	44038.7	34481.3	42044.3	39994	41845	41259	39011.7	43927.3	43890.7	66095	64192.3	65998	76871.3	73302	71211	80281.7	71526	65435.7	78600	75583.7
U6 snRNA-associated Sm-like protein LSm8 OS=Homo sapiens OX=9606 GN=LSM8 PE=1 SV=3	4.13	10402.7	5041.87	O95777	5	70.83	0	LSM8_HUMAN	15590.5	14611	11489.7	12555	14075.3	13177.3	13370.7	13994.7	14118.3	15442.7	18877	17866	21629.3	25199	22781.7	11791.3	18584.7	13297	22550.5	22406.3	24628.5	10250.7	9605.33	9104	13645.7	9359	11013.3	13207.7	11788.3	9492	11588	16419.5	15786.5	14285	14389.5	14000	22863	22535	21979.5	39354	26636
Y-box-binding protein 3 OS=Homo sapiens OX=9606 GN=YBX3 PE=1 SV=4	10.16	40090	5025.29	P16989	16	59.41	0	YBOX3_HUMAN	25138.2	23386.2	21368.9	15220.2	15596.4	16457.8	16499.3	17431	20915.7	18036.3	19293.5	34574.4	39831.1	36412.2	44072.9	26833.2	25910.4	30953.3	26865.7	24728.7	30955.3	13309.9	13426.6	12929.8	15481.9	14220.7	13963	13828.4	12531.5	13494.1	30129.7	30741	18238	29979.5	29912.6	28544.7	40345.1	39900.2	39860.9	50252	49088.1
Peptidyl-prolyl cis-trans isomerase NIMA-interacting 1 OS=Homo sapiens OX=9606 GN=PIN1 PE=1 SV=1	9.26	18357.4	5009.83	Q13526	7	53.99	0	PIN1_HUMAN	5485	5992.5	4607	14819.7	15270.3	15503.3	9333.67	9966.67	10494.7	8656.67	9362.67	9503.33	7219	5452	4221.33	5519	5696.5	5558.67	8141	6593	7232	16305	17545.7	16307.3	22464.3	15983	19378.7	19328.3	17880.3	15323.7	13527	8555.33	8165.33	8164.67	8852.67	8467	6011	5290.5	4522	5349	5857
Proteasome subunit beta type-7 OS=Homo sapiens OX=9606 GN=PSMB7 PE=1 SV=1	7.65	30307.7	4996.94	Q99436	8	44.4	0	PSB7_HUMAN	48793.3	49703.3	49376	32128	31032.3	38534.7	32422.3	31243.3	37651.3	44144	42377.3	49183.3	53430.3	52306.7	60422.3	72924.3	67235	74254	71539.3	71922	81905.3	41948.7	42544.3	44376.3	46073	43289.7	44989.7	49170	49333	49940.3	70653.7	67904	66796.3	81915.3	79848	79955.3	108253	112830	107338	121145	118992
Staphylococcal nuclease domain-containing protein 1 OS=Homo sapiens OX=9606 GN=SND1 PE=1 SV=1	6.78	102681	4980.61	Q7KZF4	38	48.02	0	SND1_HUMAN			20406	28915.7	27468.3	29443	11833.3	12281.7	12415	5371	5251.33	5026.33	4084	4304.67	4526.67			2784.5			3292	36179.7	35657.3	32956.7	34131.3	31202	33229.7	21398.3	19921.7	20063	5419	5490.67	5545.33	5418	5243	5213.67	3252	3601	3537	8366.33	9143
Eukaryotic translation initiation factor 3 subunit K OS=Homo sapiens OX=9606 GN=EIF3K PE=1 SV=1	4.62	25344.9	4980.4	Q9UBQ5	4	20.64	0	EIF3K_HUMAN				17157	17334	19766	13583	15122	17504	16324	17508	19193	4677	5529	6418			3056			3733	6211.5	13590	9148	14760	10461	12747	11732	9043	7955	6960	7066	6682
Fatty acid-binding protein 5 OS=Homo sapiens OX=9606 GN=FABP5 PE=1 SV=3	6.82	15506.6	4978.63	Q01469	5	34.81	0	FABP5_HUMAN	22881.7	21488.7	21337	16155	17693.7	22810.3	15593	16377	20641.7	23353	22418.7	26352.7	24598	22884.7	26800.7	21852.7	22032.3	23339.7	19825.5	21991	20599.3	20207.3	18302	20552.3	25291	22796	25030.3	28071.3	27323.7	29181	32832.3	34390.3	35132.3	35971	40013	37610.3	17965.7	19424	19486.3	25496.3	24116
Glutathione peroxidase 1 OS=Homo sapiens OX=9606 GN=GPX1 PE=1 SV=4	6.18	22223.3	4976.51	P07203	6	38.92	0	GPX1_HUMAN	28563	28797	27592.7	19629	19567.7	18582.7	17319.7	18030.3	17470.7	22906	22943.3	24188	29397.3	19477	30476.7	33921	33319.3	31594.3	28323.3	29921	27881	20030.7	19854.7	20289.3	19025.3	20279	20255	18241	20734.3	19197.7	27666.7	28871	29456.7	36684.3	33349.7	34001.7	44470	46488.3	38616.3	36545	37384
26S proteasome non-ATPase regulatory subunit 12 OS=Homo sapiens OX=9606 GN=PSMD12 PE=1 SV=3	7.59	53303.7	4953.72	O00232	23	51.97	0	PSD12_HUMAN	9691.67	8837.33	8277.67	25984	24959.7	26393.3	23125	22133.3	23715.3	15348	15372.7	15821.3	6331	7390.67	8481.33	5931.67	7223	6006.33	6655	5775	4457.33	24585	24583.7	25951	23236.3	22963	22699.7	21685.3	21116	21463.7	12488.3	12821.3	14677.7	10332.7	10698	9906.33	6727.33	7076.67	7078.67	5204	5521.67
ATP-dependent RNA helicase DDX3X OS=Homo sapiens OX=9606 GN=DDX3X PE=1 SV=3	6.8	73642.7	4953.67	O00571	33	51.36	0	DDX3X_HUMAN	15617.2	14709.5	22482.2	31728.7	30531.4	36706.6	38480.3	36179.3	40373	20996.4	19945.2	24888.2	19564.2	19890.8	22942.3	11927.6	10385.9	15069.6	6555.04	4633.17	7841.53	30229	29272.7	29923.3	30623	26816.3	28070	17116.9	17468	17562	9144.22	9113.58	9179.32	6078.83	6171.78	5967.81				4674.09	5194
Myosin-11 OS=Homo sapiens OX=9606 GN=MYH11 PE=1 SV=3	5.25	228195	4879.94	P35749	49	27.64	0	MYH11_HUMAN	14267.9	15324	13693	14272.7	18591.3	14575.6	13775	11775.3	13152.6	12728	15620.3	13154.6	13334	13171	10533	13481.3	12670.7	12134.7	23032.7	17666.7	15264.7	11429	11613.9	11953.1	15517.4	15579.1	15908.8	15037.7	15229.1	15114.7	16791.8	16157.5	16503.3	11575.7	12236.3	11553.4	12221.5	12386.6	11210	15999.1	15108.8
Serpin B6 OS=Homo sapiens OX=9606 GN=SERPINB6 PE=1 SV=3	5.01	42964.2	4860.62	P35237	18	56.91	0	SPB6_HUMAN	21551	23480.3	23605.1	15222.3	14768.3	16609.3	16234	15831.7	19124	22208	20801.3	24820.3	24491	20716.3	24915.7	6271.33	7091	7897	4256.5	4029	4976.33	18415.7	18686.7	17701	14890	14807.7	15126.3	16429	16322.3	15660.3	23669.3	24078.7	22012	24861.7	24511.7	21942.7	5449.93	5338.27	4767.82	6005	5633.81
DNA-directed RNA polymerases I_ II_ and III subunit RPABC3 OS=Homo sapiens OX=9606 GN=POLR2H PE=1 SV=4	4.3	17200.4	4859.12	P52434	6	57.33	0	RPAB3_HUMAN	7637.33	6820.5	7638.33	12207.7	12406.3	17120	11344.3	11759.7	15279.7	10805.3	10115	13076.3	9335.67	9305	8675	8097.33	8114.33	10746	6200.33	6200.67	8247	24402.3	24555.7	24007	21723.3	20998	21152.3	20934.7	20740	20039.7	15700.7	15564.3	16293.3	14811.7	14821.3	14530.7	16425.7	15911.7	14836.3	11535.7	10329.3
Protein RCC2 OS=Homo sapiens OX=9606 GN=RCC2 PE=1 SV=2	8.92	56826	4858.15	Q9P258	20	46.17	0	RCC2_HUMAN	6409.67	6767.67	6540.67	34953.7	34209.3	34256	33255	35236	38068.3	33765.7	34588.7	36209.7	7335.33	7363.33	8160.33	5804	6504.5	7292.5	6525	6546.67	6061.33	46254.7	46540.3	47545	41934.3	41919	44673	44790.3	45771	44524.3	36595.3	37400.7	37158.7	8551	9235	8924	7927	7954.5	12429	5048	9559.5
60S ribosomal protein L13 OS=Homo sapiens OX=9606 GN=RPL13 PE=1 SV=4	12.16	24318.5	4851.24	P26373	9	35.07	0	RL13_HUMAN	10945	9895.67	9790.67	15010	14138.7	15949.7	13462.7	13692	16076.7	11409.7	11924.7	13065	9723.67	9326.67	10556.3	7593	8114.67	9361	17467	17042	20088.3	12195.3	12078.7	11685.3	17846.7	18336.7	17322.7	15605.7	16074	16302	18065.7	19382.3	18346.7	15535.7	16579.3	15863	5928	6066.67	5947.33	17286.7	17515.3
Heterogeneous nuclear ribonucleoprotein L OS=Homo sapiens OX=9606 GN=HNRNPL PE=1 SV=2	8.19	64760.2	4846.84	P14866	13	34.8	0	HNRPL_HUMAN	4579.5	3371.5	3721.5	29084.3	30183	45230.7	15908	14021	24985.3	8168.33	5995.67	13900.7	4596.67	4335.33	11027.7	3289	2951.5	6479	3641	3297	9222.67	41438	38757	31392.7	54790.7	46454.7	52642.3	43931.3	41743.7	36358.7	13005	12284.3	11437.3	10544.7	10320.3	9499.67	5875.33	4788.67	4928.33	13345.3	14181
Nuclear transport factor 2 OS=Homo sapiens OX=9606 GN=NUTF2 PE=1 SV=1	4.96	14649.6	4846.26	P61970	3	24.41	0	NTF2_HUMAN	53802	57603.5	57360	26237	26701.7	23442	24669.7	25940	22481	33725	37163.7	34917.3	35264.3	35750	32677	66141	44212.3	37645.3	54510	45731.7	39592.3	27463.3	24457.3	22188.3	28617.7	24373.7	24492.7	28776.3	26105.3	36628	46009	46520	49811	51252	51710	51627	78218	84569.5	77723	69696.5	71687.5
Calponin-3 OS=Homo sapiens OX=9606 GN=CNN3 PE=1 SV=1	5.64	36584.9	4822.05	Q15417	14	44.38	0	CNN3_HUMAN	8618	8483.5	8848.33	16279.3	16215.3	19389	14940	13556	17354.3	10923	10413.3	11756.3	10507	10571.3	10473.3	8651	8513.33	8473	9349	9765	10241	29175	29766.7	28497.7	30725.7	29589.3	31561.3	32105	30433.3	29811.3	16315.7	16617.7	16219.7	14684.3	14878.3	14549.7	18979.7	18444	16149.7	18848	17331.3
26S proteasome regulatory subunit 6B OS=Homo sapiens OX=9606 GN=PSMC4 PE=1 SV=2	4.91	47480.4	4814.26	P43686	25	69.86	0	PRS6B_HUMAN	15321	13796	9535.33	34266.7	34788	31937	29976.7	30066.7	29618	21292.7	20331.3	18143.7	12128.3	11038.3	8375.33	6560	5080.33	6212.33	5947.67	6280.67	6173.67	27100.7	26409.3	26542.7	28991.3	26796.7	27880.3	23762.7	23655	23957.7	13880	14114.3	13141.7	9403	9698	9417.67	5236	6722	6656	3800	4882
26S proteasome non-ATPase regulatory subunit 7 OS=Homo sapiens OX=9606 GN=PSMD7 PE=1 SV=2	6.34	37082.5	4807.09	P51665	12	46.3	0	PSMD7_HUMAN	5250	6287.67	4732	20070	21134.7	18957	16779	19526.7	17633.7	12478.7	13628	11910.7	3220	6180	5161.33	2863	3257	3622	4025	4150	5240	18388	18233.7	17936	16697.7	16880.3	17967	15761.7	16028.3	17240.3	10008.7	11154.7	10393.7	6131.5	7298	5673			5391	7813	6677
Dihydropyrimidinase-related protein 2 OS=Homo sapiens OX=9606 GN=DPYSL2 PE=1 SV=1	5.95	62749.9	4802.48	Q16555	24	54.37	0	DPYL2_HUMAN	14800.7	16240.7	15831.7	22128	21635	21353.7	21796	22572.3	22107.7	25167.3	23946.7	22738.3	17558	17460	24690	11633.3	12487.7	16077.7	11153.3	13558.3	11866.3	17553.7	17371.3	16657.3	19808.7	16389	18064.3	20091.7	19287	17161	18532	20112	18188	15418.7	14416	13405	14592	14890.3	15280	11264.5	11722.2
Heterogeneous nuclear ribonucleoprotein A3 OS=Homo sapiens OX=9606 GN=HNRNPA3 PE=1 SV=2	9.3	39823.1	4790.88	P51991	12	33.6	0	ROA3_HUMAN	13749.6	12999.5	13228.3	48173.7	50735.7	52453.3	30868.7	31579.7	30656.7	19594.7	19450	18835.3	14069.7	14492.3	15552.7	12392.7	11971	14498.3	18749.3	20372.7	21199.3	41789.7	38551.3	37883.3	52153.3	50877	52396.3	43545	45521.3	39775.3	21150.3	20350.7	21298	16392.3	15209	15248.7	12363.3	12198.3	11366.3	21431.3	20079
Annexin A4 OS=Homo sapiens OX=9606 GN=ANXA4 PE=1 SV=4	5.74	36110.9	4779.28	P09525	18	50.16	0	ANXA4_HUMAN	3722			17000.7	16030.7	19201.3	15396.7	15961.3	16252	7882.67	8077.67	8864	4790	3265	4072			2635			3987	13107.7	13037	13375	13003	13025	12939.7	13155.7	13505.3	13602.3	5122.33	5187.33	5314	3975.33	3997	3955	3319	3490.5	3813.5	4559	4339.67
Non-POU domain-containing octamer-binding protein OS=Homo sapiens OX=9606 GN=NONO PE=1 SV=4	9.51	54345.8	4775.1	Q15233	22	46.07	0	NONO_HUMAN	19645	18385.3	18724	47288.3	50133.7	48178.3	34290	36236	32375.7	24007.7	24444.3	21645	13387.5	12620.7	10294.6	12023.3	12630.7	11353	17481.7	17791	16012.3	53803.7	52878.3	50148.7	56026	49721	52111.3	43934	45063.3	44137	18045.3	17309.3	18725.3	15468.7	15870	17745.7	16263.7	20260.7	24311.7	20224	23712.3
Alpha-galactosidase A OS=Homo sapiens OX=9606 GN=GLA PE=1 SV=1	5.22	49508.2	4767.86	P06280	12	27.27	0	AGAL_HUMAN	19982	25309.7	22255	29633	28272.3	27599.7	29027	27637.3	25065	35669.7	31301.7	31115	27017	25746.3	19948.3	19334	16448	14126.7	14553.7	14423.7	12275.3	50280.7	51265.3	44960.7	48812.7	32028.3	43590.7	50313.7	47113.7	42658.3	55881.3	51019	41001.7	42224	37864	32705.7	16516.3	17251.3	12919	6747	6587.33
Charged multivesicular body protein 4b OS=Homo sapiens OX=9606 GN=CHMP4B PE=1 SV=1	4.57	24950.2	4765.3	Q9H444	10	53.13	0	CHM4B_HUMAN	37267	45371.3	43051	24495	24554	36430.3	30747.3	31973	30009	40473.7	39829.7	44926.7	46170	48092	55567	46210.3	47391.3	36748.3	37481.3	40594	38206	20002	20925.7	27523.3	28163.7	29165.7	21188.3	28326	19900.3	18657.3	25083.3	27643.3	25070.3	31349	33368.7	32315	44876	45649	44957.3	35503.3	35590.1
Putative endoplasmin-like protein OS=Homo sapiens OX=9606 GN=HSP90B2P PE=5 SV=1	4.97	46372.3	4760.49	Q58FF3	13	24.56	0	ENPLL_HUMAN	14929.3	13970.2	15272.2	9841.97	10485.4	11889.7	15894.4	15026.4	20554.4	13652.4	14622.6	18009.8	10296.2	9856.14	12937.2	83900.7	81225.4	101265	11038.8	11587.9	12691.3	14203	13748.8	14205.3	40463.5	43257.5	40011.1	42391.9	43724.1	42345.3	44118.6	40800.2	38391.2	84768.2	75154	71300.7	44313.7	42686.5	40022.1	47707.4	46651.9
Histone H1t OS=Homo sapiens OX=9606 GN=HIST1H1T PE=2 SV=4	12.27	22019	4758.69	P22492	5	24.64	0	H1T_HUMAN	2428.4	2727.2	2382.17				5111.96	3936.96	9063.02	9198.87	4077.24	5910.5	7600.73	7692.97	8611.9	5349.92	4531.3	5726.12	3780.99	7123.09	3619.39	12154.6	7573.92	11769.6	8478.77	8746.17	13093.3	13405.5	9421.08	13408.9	11251	11252.4	11631.7	8346.19	8736.03	8621.74	11375.2	11549.4	11466.3	15410.6	14761.1
Leucine-rich PPR motif-containing protein_ mitochondrial OS=Homo sapiens OX=9606 GN=LRPPRC PE=1 SV=3	5.75	159103	4744.33	P42704	69	50.5	0	LPPRC_HUMAN	32384.7	30458	30346.3	45652.7	38799	53855	32074.3	33995.7	36947.3	36422	36147.3	30465	30008	31147.7	36719	27117.3	25240.3	40754	23584	28409.7	41611	52275.7	54006	52360	45698.7	45000.7	47018	35093	33715.7	34327.7	34500.7	36621	33151	56875	57577	54324.3	47952.3	46598.7	48867.7	42949	45436.7
Myeloid-derived growth factor OS=Homo sapiens OX=9606 GN=MYDGF PE=1 SV=1	6.26	18909.3	4736.22	Q969H8	5	26.59	0	MYDGF_HUMAN	8550.67	8356.33	10323	9667	9495.33	10841.7	6456.33	6194.67	8316.33	10023.3	8300.67	9868	9278.67	8949.33	6836	11056.7	10233.3	10418.3	10398.7	10831	9417.67	14006.3	13130.3	14233.3	14851.3	13577.3	12897.7	15923	15088	14114	15081.7	14303	15193.3	13426.7	13060	12383	8627	8564.33	8647	8216.33	7701.67
Enoyl-CoA delta isomerase 1_ mitochondrial OS=Homo sapiens OX=9606 GN=ECI1 PE=1 SV=1	8.68	33101.2	4735.39	P42126	8	23.84	0	ECI1_HUMAN	48437	38477	46682	36575.3	36599.3	41722	35500.3	36992	41289.3	45526	43444.3	49006.7	43664.3	40095.3	41575.3	50377.7	60577.7	62812.3	60625	65065	64731	36827.3	36342.3	36772.7	35452.3	37229	38302.3	35345.7	35307.7	37696.7	38366	37040	38165.7	39631.7	42594.3	40259	57494.7	54719.7	53759.3	59906.3	54645.7
WD repeat-containing protein 1 OS=Homo sapiens OX=9606 GN=WDR1 PE=1 SV=4	6.21	66877.9	4734.88	O75083	25	49.34	0	WDR1_HUMAN	7146	10881	10503	38543.7	39183.3	40604.3	34972.3	37201	39760	32970.7	30587.7	33075.7	4774.33	5263.67	6591			2577	7648	6468	2487	33733	34451	33999.3	36271.7	28651.3	29471.3	35984.7	32262.7	31269.3	17050.7	20315.3	21480.7	8634	8022.33	7296	3540	2894	3386.33	3321.5	3519
Eukaryotic translation elongation factor 1 epsilon-1 OS=Homo sapiens OX=9606 GN=EEF1E1 PE=1 SV=1	8.92	19867.6	4732.45	O43324	10	57.47	0	MCA3_HUMAN				17879.7	15859	14954.7	4182.67	5387.33	5376.67	1990	2437.5	2398									2447.5	20855.7	21666.7	21240.3	17574.3	18015	18180.3	8301	8120.67	8076.67	1942	2207.67	2748	2776.5	2582	3579		2500	2748	4004.5	4416
Ras-related protein Rab-35 OS=Homo sapiens OX=9606 GN=RAB35 PE=1 SV=1	8.39	23310.4	4731.01	Q15286	4	23.38	0	RAB35_HUMAN				4407	3953		4025	5103		4208.5	3994.5	3126														3427				12817	7914	7679	8609	6468	6561	6596					3276
Ribose-phosphate pyrophosphokinase 1 OS=Homo sapiens OX=9606 GN=PRPS1 PE=1 SV=2	6.57	35347.5	4730.75	P60891	11	28.62	0	PRPS1_HUMAN	28057.3	28056.3	27216.4	18069.7	19908.1	20473.8	20376.5	20163.8	18717.4	26347.2	26550.4	22933	25237.6	23697.6	25707.2	14324.7	13684.7	14853	7026.19	7267.12	7577.33	29343.9	31910.1	30405.6	28273.4	26999.7	29143.5	27716.7	31033.8	29990.6	41421.6	44337	40654.6	41522	42160.1	43370.2	23263	22160.7	22173	13059	10719.7
60S ribosomal protein L6 OS=Homo sapiens OX=9606 GN=RPL6 PE=1 SV=3	11.28	32785	4720.95	Q02878	14	44.44	0	RL6_HUMAN	16641.3	15753.7	14587.7	40596.7	36905.7	42717.7	36919.3	36933.3	36651.7	25890	26528.7	26094.7	16736	16978.3	18028.3	9273.33	9646.33	10223	21972	23062	24668	17240.7	19483.7	18875.3	24571.3	22507.3	24176	17748	18234.3	20438	21157.3	21808.3	18718.3	13145	15979.3	15020.7	4694.33	3996.33	5260.67	14840.3	14181.3
Ras-related protein Rab-15 OS=Homo sapiens OX=9606 GN=RAB15 PE=1 SV=1	5.4	24675.8	4699.69	P59190	1	3.77	0	RAB15_HUMAN				4598	4954													3732																						3389	3834
ATP-dependent Clp protease proteolytic subunit_ mitochondrial OS=Homo sapiens OX=9606 GN=CLPP PE=1 SV=1	8.11	30465.3	4689.53	Q16740	9	39.71	0	CLPP_HUMAN	18140.3	18518.7	17654	12216	11847	14244	11438	10743	13041.3	16064.3	15351	19471.7	14584.7	14643.3	16884.7	5248	6008.33	5752			2236	15985.7	17131.7	13811	15727	12153	14289	15965	15907	13877	23853.7	20863	18175.7	19666.3	16753.3	16341.7	6401	7418	6494.67	2424	3270
TPT1-like protein OS=Homo sapiens OX=9606 PE=2 SV=2	5.8	15814	4663.35	Q56UQ5	4	51.43	0	TPT1L_HUMAN				16031.5	17813.7	19368	6993.62	9517.92	7779.47	3305.83	5187.96	4142.38													1692.42	2131.56	1760.75
Ubiquitin-conjugating enzyme E2 K OS=Homo sapiens OX=9606 GN=UBE2K PE=1 SV=3	5.16	22520.7	4652.53	P61086	12	66	0	UBE2K_HUMAN	14153.7	13971.3	14646	16489.7	18706.3	14413.7	16828	18271.3	11151.7	22308.7	20799.7	21665.3	12095.3	14656.7	14094.7	10139.3	9580.33	10753.3	10469.3	10030.7	14832	15893	13925.7	13314.7	12201.3	15706	13549	13931.3	14544.7	11568	21962	20752	22964.7	17046.7	14289	18970	13476.3	15392	17786.7	5614.67	8338
Zinc finger Ran-binding domain-containing protein 2 OS=Homo sapiens OX=9606 GN=ZRANB2 PE=1 SV=2	10.66	37860.7	4639.22	O95218	12	29.09	0	ZRAB2_HUMAN	17160	15544	14210.3	8532.67	8739.33	11545.7	9928.33	9183.33	13610.7	11803	11330	17178.7	17448.7	16295	27297.3	20040.7	18964.3	27354.3	22539.7	22902.3	33549.3	9209.67	9576.67	10144.3	12803.7	13073.7	13594.7	13104.3	13326	13365.3	20419.3	20992	21229.3	21929.7	21167.7	22146.7	27833.3	27989.7	26000.3	31256.3	31274
Eukaryotic translation initiation factor 2 subunit 1 OS=Homo sapiens OX=9606 GN=EIF2S1 PE=1 SV=3	4.82	36397.4	4638.55	P05198	18	54.92	0	IF2A_HUMAN	12234.7	12572.3	12690.7	29903.3	29129	35804.7	25731	26232.7	31152.3	35367	29350	32859.7	12829.7	12076	12481.3	5442	5405	6718	7773.33	7918.67	9120.67	38653	38472.7	37891	38982.3	40223	39879.7	40546.7	40712.7	38924	33368.7	33784.3	34341.7	16319.3	16883.7	15651.3	5559.33	5602.67	6436.33	9067.33	8749
Protein mago nashi homolog OS=Homo sapiens OX=9606 GN=MAGOH PE=1 SV=1	5.71	17220.7	4623.47	P61326	10	50.68	0	MGN_HUMAN	13606	13017	10516.3	17523.3	22478	21532.3	18634	21438.7	20485	17210	16368.3	21889.7	9227.33	8464.67	11697.7	6639.5	6577	6154.67	6844.5	7111	8276.5	16581	15033.3	15996.7	17145.7	16178	16511	15722	15961.7	21160	21012.3	16787.7	16324.7	14017.7	13586.3	13879.3	10706.7	10578.3	10124	12066	10914.5
Glycylpeptide N-tetradecanoyltransferase 1 OS=Homo sapiens OX=9606 GN=NMT1 PE=1 SV=2	7.72	57148.5	4622.84	P30419	20	45.36	0	NMT1_HUMAN	10926	6251	5758.5	26741.3	30009.7	33118.3	26619.3	31097	34594.7	15742	15223.7	26082	6892.33	6694.33	4178.33	4177.5	3927.33	3682.5	5622		4451.67	33831.7	33756	33449	33257.3	32410.3	34216.7	33168	33969.7	32447	24076.3	15350.3	22346.7	6045	8320	5789.67	6483	5051.5	2755	4212	3738
Serine/threonine-protein phosphatase PP1-alpha catalytic subunit OS=Homo sapiens OX=9606 GN=PPP1CA PE=1 SV=1	5.92	38253.5	4609.19	P62136	9	30.3	0	PP1A_HUMAN	9096.26	8720.96	8348.17	14695.9	15412	17873.8	15276.5	15713.9	18187.2	15626.2	13877.5	15585.8	9133.67	8745.08	10861.2	3190.85	3596.69	3966.61	3117.31	2968.6	4106.6	17300.6	16990	16380	18816.6	18409.7	17067.5	17667.7	17308.6	16448.3	16942.4	16240.6	16917.7	13169.5	12907.7	12931	5268.33	5374.67	5451.67	4950.67	5092.33
Ras-related protein Rab-14 OS=Homo sapiens OX=9606 GN=RAB14 PE=1 SV=4	5.82	24125.1	4601.4	P61106	11	64.65	0	RAB14_HUMAN	5169.5	6054	7301	8959.33	9460	9166.33	8995.67	9546.33	9524	12406.7	11942.7	12024.7	8576.33	7829.33	8204	3950	3473	2939.33			2158	9365	9273.33	8403.67	8845	6603.33	8048.33	8608.33	8305.67	7983.67	10847	9324	8227.67	7757.33	7200	6883	2501	2609	3005		3462
Phosphoribosyl pyrophosphate synthase-associated protein 1 OS=Homo sapiens OX=9606 GN=PRPSAP1 PE=1 SV=2	6.84	39678.9	4595.92	Q14558	11	39.61	0	KPRA_HUMAN	5314.35	5953.24	5000.65	7969.96	7662.99	7616.05	7870.48	8470.7	7701.24	9511.2	8909.63	8982	5491.34	6471.75	5769.29						1443.5	9098	8668.33	9137.33	7743.4	8584.33	8294.13	8247.41	8350.56	8272	8755.92	8980.02	9712.03	6999.52	6653.98	6621.49	2607.17	2651.43	2563.6	1465.5	1792.5
Arginine--tRNA ligase_ cytoplasmic OS=Homo sapiens OX=9606 GN=RARS PE=1 SV=2	6.27	76177.5	4593.81	P54136	28	45	0	SYRC_HUMAN	19557	18352	17132	22269.7	22032	22574	12222	11190	13331.7	6595.67	6875.33	10727	11975	13633	12638	52833	52879.5	66254.5	17312	16745	16936	26833.7	27204	27723.3	23775	24788	24250.3	15362.3	16307	15479	10975.3	10557.3	10099.3	41483.7	38577.7	35195.3	14618.7	13827.7	13078.3	24524	23973.3
Small ubiquitin-related modifier 1 OS=Homo sapiens OX=9606 GN=SUMO1 PE=1 SV=1	5.22	11614	4588.4	P63165	6	81.19	0	SUMO1_HUMAN	22560	23968	23582.7	17563.2	19033.3	19279.4	16610.3	16703.3	16600	20622	19824.3	21622.3	26591.5	31522.5	20926	20581.5	18545.5	23078	25242	26155.3	26651.7	23126.3	24771	24706	24077.5	22388.4	23403.8	28355.5	25427.3	26381.7	22182.3	22431.7	21456.7	15947.5	15963.5	16099.1	25788	23410	24494	29711.7	29590
Isopentenyl-diphosphate Delta-isomerase 1 OS=Homo sapiens OX=9606 GN=IDI1 PE=1 SV=2	5.94	26661.4	4575.77	Q13907	10	52.42	0	IDI1_HUMAN	14097.7	15471	15400	21283	21008.7	22452.7	19101	19340.7	19627.7	22730.3	23375.3	25049.3	23458.3	21063.3	22621	11931.7	13406.3	14660	12764	13371	14262.3	10903.3	11031	11101	10980.7	9727.33	9400	10549.3	10231.3	10028.7	11167	11072.7	11343.3	9502.67	9388.67	9456	13921	9414.5	10130.5	8332.5	15286
N-alpha-acetyltransferase 10 OS=Homo sapiens OX=9606 GN=NAA10 PE=1 SV=1	5.31	26629.6	4569.54	P41227	16	59.57	0	NAA10_HUMAN	2529	1837.5	1928	16512.7	16651	18113.7	22419	22066.7	25501.7	16167	15098.3	17131.3	4550	4055.67	4292.67			2167.5			3266	21612.7	21905	21619.3	23209.7	21586.7	21893.7	21194.3	21918	21284	19458.7	20014	18845	6568.67	6432.67	6449.67	3850	3944	4241.33	4256.67	4215.33
Sulfotransferase 1A1 OS=Homo sapiens OX=9606 GN=SULT1A1 PE=1 SV=3	6.2	34279.5	4563.41	P50225	13	50.51	0	ST1A1_HUMAN	1740	1806.67	1775	19138.9	19306.8	15628	19477.6	18365.2	17087.3	8822.65	7870.73	5350.99	749.461	714.008	1095.68					1964.5	3359.5	6900.96	7251.6	7263.07	6987.49	6405.51	6890.19	7708.93	7918.04	7751.21	2230.35	1606.65	2467.7	3207.85	2619.79	3458.98	3664	3883.33	3501	4569.33	4468.33
Glutamine--fructose-6-phosphate aminotransferase [isomerizing] 1 OS=Homo sapiens OX=9606 GN=GFPT1 PE=1 SV=3	6.7	79605	4560.47	Q06210	28	46.07	0	GFPT1_HUMAN				14720.3	13645.7	15398.7	12245.7	12117	13306	8060.33	7511.67	8758	2716.67	2999.33	5503						2118	21192.7	21903.3	21971.3	18464.7	19017.3	19028.7	17587	17814	16882	12260.3	11907	12159.3	8808.33	8598.67	8486.67	5232	4743	4037	4873	4518
Serpin H1 OS=Homo sapiens OX=9606 GN=SERPINH1 PE=1 SV=2	9.14	46554.7	4560.45	P50454	19	52.63	0	SERPH_HUMAN	24353	24644	23638	19194.7	20095.7	19843.7	22133.7	22493	21802	29313.7	26831.3	25947.7	24147.7	22523.3	22940.3	27300.3	26453.3	26300	33895	32059	32643.3	21770.3	22990.3	22196.7	21882.3	21025.3	21352	22239.3	21958	21452	28433.3	26464.7	27025.3	24370.7	22725.3	22968	22805.7	22092	19815	26767	28181
Importin-5 OS=Homo sapiens OX=9606 GN=IPO5 PE=1 SV=4	4.65	125113	4559.76	O00410	28	29.44	0	IPO5_HUMAN	13524.7	13619.7	13025	28742	26601.7	29881.5	29084.4	29999.6	30577.6	35113	34132.7	33095.4	15715.9	15807.4	16388.6	3428.95	2808.33	3389.48	4551.68	3412.7	4630.63	30992.8	29525.7	28889.5	26404.2	25558.6	26092.1	28101.9	27180.9	25695	31751.8	31455.5	33676.8	17819.3	19651	17329.7	6327.33	6358.67	6938	7830.33	6614.33
Polypyrimidine tract-binding protein 1 OS=Homo sapiens OX=9606 GN=PTBP1 PE=1 SV=1	9.69	57392.5	4535.4	P26599	17	43.69	0	PTBP1_HUMAN	7908.33	13486.7	13061.3	47099.6	46659.6	46567.3	44883.5	42488	41837	28136.7	26865	28540.7	14485.4	15533.7	16078.6	11395.2	16057.4	15056.6	13003.4	16261.2	17349.3	55039	55419.3	51273	47021.7	43389	45059.3	43977	43897	39988.7	12444.3	11943	13077	4004.72	4895.5	6327.65	7422.33	8604.32	9364.5	3691	4238.5
Aldo-keto reductase family 1 member A1 OS=Homo sapiens OX=9606 GN=AKR1A1 PE=1 SV=3	6.37	36915.3	4518.67	P14550	12	42.46	0	AK1A1_HUMAN	8933	6992	6550	16473.7	17172.3	16685.3	17056	17391	16799	10984.7	10949.7	11091	6881.33	8191.5	4852	4598	4647	3307	3793.5		2990.5	15943.3	15948.3	16236.3	13161.3	13406.7	12804.7	13951.3	14794.3	14546	9007.33	9458	8940.67	7846.67	8088.33	7011	4321.5	4040.67	3800.33	3860.5	4157.5
Small ubiquitin-related modifier 5 OS=Homo sapiens OX=9606 GN=SUMO1P1 PE=1 SV=2	5.2	11583.1	4485.45	G2XKQ0	4	33.66	0	SUMO5_HUMAN				3320.69	3710.99	2831.28																			3293.79	2897.28	3192.82							7703.76	7730.18	6933.58
Drebrin-like protein OS=Homo sapiens OX=9606 GN=DBNL PE=1 SV=1	4.82	48492.5	4472.97	Q9UJU6	20	50.7	0	DBNL_HUMAN	19041	21046.3	18156.3	34114	33357	35740.7	28522	30736.3	27171	25212	25713.3	26916.7	22598	20496.3	19608.3	25669	23897.7	22167.3	23850	22525.3	21852	41105.7	37271.7	36548	46861.3	34704	43335.7	43137	43817	42026	27924.3	27986	24701.3	28451.7	28863	27750.7	24430.7	23468.3	20609.3	33349.7	35567
Eukaryotic peptide chain release factor subunit 1 OS=Homo sapiens OX=9606 GN=ETF1 PE=1 SV=3	5.38	49259.1	4469.5	P62495	14	34.1	0	ERF1_HUMAN	20508.5	19954.5	19662.5	22079.3	21897.7	25146	21554.7	20792	22892.3	18451.7	18757.7	20796	17570.3	22593	15560.7	45907	43148	18614	18079	13912	14642.7	33136	32843.7	32316.3	30147	29475.3	30555	30773.3	30627.7	30736.7	22599.7	20775.3	21058.3	9865.33	9914.33	9619	14864.7	14008	12359.3	15041.3	13968.7
U6 snRNA-associated Sm-like protein LSm2 OS=Homo sapiens OX=9606 GN=LSM2 PE=1 SV=1	6.11	10948.6	4447.95	Q9Y333	3	42.11	0	LSM2_HUMAN
UMP-CMP kinase OS=Homo sapiens OX=9606 GN=CMPK1 PE=1 SV=3	5.27	22450.5	4444.08	P30085	12	63.27	0	KCY_HUMAN	11568.7	11775.7	8841.67	27205.3	27660	31907	21097.3	22150.3	25114	18006	17256.7	19475.7	5965.33	8033.67	9617.33	12174.7	12139.7	12519.7	13187.3	13534	15421	27651.3	26871	25427	27808.3	24870	27224	28449.3	28303.7	26319.7	16423.7	15685	14739.7	12246	12996.7	11801	11287	11121.7	10647	13014.7	12570
Kinesin-1 heavy chain OS=Homo sapiens OX=9606 GN=KIF5B PE=1 SV=1	6.1	110426	4438.19	P33176	51	54.93	0	KINH_HUMAN				19269.3	17999.7	26974.7	18454	16339	25607.7	7718	7536	10650.3	2963.42	2937.33	4319.33	10202.5	7544.98	3407.65	2689.39	2364.5	4366.9	30695.7	30012	31922	29846.7	31437	31831.3	27798.3	27403.3	28311.7	9773.67	10119.7	10645.7	5798.67	6067.33	6224.67	3668	3412.67	3930.33	7993.67	7751.33
60S ribosomal protein L24 OS=Homo sapiens OX=9606 GN=RPL24 PE=1 SV=1	11.85	17893	4397.55	P83731	3	19.11	0	RL24_HUMAN	6662	6079	6643	14601	14523	14079.7	13589	10880.3	9626	10820.5	8647.33	7133.33			4794.5	6024	6381	4547	13115.7	11741	9168.33	14990.3	14391.7	14111	15555.3	16181.3	15668.3	14884	14996.7	15178.3	10749.3	9650.33	9477.33	4590.67	5821.5	5472.5				7959	7268.5
Myosin light chain 6B OS=Homo sapiens OX=9606 GN=MYL6B PE=1 SV=1	5.43	22878.1	4386	P14649	5	24.04	0	MYL6B_HUMAN	8832.55	9196.71	9945.54	5936.07	5649.79	7550.35	9637.6	8109.12	11035.7	5079.56	5560.2	5788.1	6447.77	6531.12	7603.32	6567.35	5853.44	6777.23	6070.58	5673.82	7421.57	7039.47	6446.11	6713.89	6956.28	6640.1	6717.82	6559.37	6156.89	6372.66	5396.22	5146.31	5173.58	5042.45	4680	4617.61	5163.8	4210.77	4323.4	6742.4	9146.71
Splicing factor 3A subunit 3 OS=Homo sapiens OX=9606 GN=SF3A3 PE=1 SV=1	5.11	59191.2	4385.95	Q12874	20	38.92	0	SF3A3_HUMAN	8489.33	8377.67	8523	33463.3	36101.3	40828.7	30522.3	31732.3	32084	26081.3	23563.3	23768.3	16957.7	15851.3	13737.7	11822.3	12344	12161	11963.3	11310.7	13929	39068.7	37201.3	39000.3	39880.7	36866	38966.7	36047	34912.7	33351.3	20934.7	20939.3	20928.7	13197.3	12241	12447	14758.7	15245	14217.7	16918.3	16771
60S ribosomal protein L19 OS=Homo sapiens OX=9606 GN=RPL19 PE=1 SV=1	12.01	23580.1	4384.35	P84098	6	23.47	0	RL19_HUMAN	22659	18864.7	23237.5	37507.3	37696.7	37662	37166.7	39035.7	39751.3	31096.7	29741	41964.5	19875	19696.7	20100.7	11153	10269.3	11066	19704	19962.3	21642	24700.7	26163.7	24449.3	31150.7	27723.3	30316	27882.7	27054.7	26317	31267.3	31138.7	28957	23114.3	24192	22203.7	7028.33	7810.67	7843.67	11844.7	11079
Myosin light chain 3 OS=Homo sapiens OX=9606 GN=MYL3 PE=1 SV=3	4.84	22103.2	4382.32	P08590	2	7.69	0	MYL3_HUMAN				3764	3703	1648.67	2307	2786	1523.5	4514	4028	2337				3072	4475	3337		3860	3407.5	2981	3467	2805.67	2657.33	2474.67	2672	3000.67	2720.67	2963.5	5623	5472	3731	5710	3846	2589
Annexin A1 OS=Homo sapiens OX=9606 GN=ANXA1 PE=1 SV=2	6.67	38942.4	4375.62	P04083	18	58.09	0	ANXA1_HUMAN	5082.5	12293	9330.5	19916.3	19747.3	22064.3	20066.7	21891.3	23049.7	11873	12049.7	12080.3	7109.33	6255.33	8261.33	11541	14360	9172	16799	18135	6848	19732.7	23202.7	23807	16602.7	18545	20099.3	18076.7	21950	21768.7	12692.7	14914.7	14849.3	6017.67	3674	7512	4295	3118		10022.7	10465.7
Acyl-coenzyme A thioesterase 13 OS=Homo sapiens OX=9606 GN=ACOT13 PE=1 SV=1	9.77	15074.6	4375.05	Q9NPJ3	5	47.14	0	ACO13_HUMAN	27575	28224	26871	11884.7	13921.3	13412.3	13236	13850.5	10849.7	18733.5	19697.7	19936.7	21904	20267.3	23446.7	29310	21251	18970.3	31438	22688.3	21955.7	11006	9129	9725.5	7882.67	9227.5	9101	9752	9731.5	10560.5	13998	15024	14487	16753.5	17658.5	16538	21830	21273	19465	20818.5	20114
Eukaryotic translation initiation factor 4 gamma 1 OS=Homo sapiens OX=9606 GN=EIF4G1 PE=1 SV=4	5.07	176233	4372.14	Q04637	58	36.59	0	IF4G1_HUMAN	15266	17607.3	18421	28514	30670.7	31842.3	18233.7	18754	23574	13851.4	13924.2	13928.7	13609.8	13871.3	14872.4	16621.7	14838.3	13268	22592	22829	17516.7	39750	38266	37687.7	32972	32676	32463.3	26360.7	28165.3	25040	13051	14108.7	12437.7	13586.8	12535.8	12950.9	15227.3	13013.3	11456.7	14061	13268.7
Splicing factor 3A subunit 1 OS=Homo sapiens OX=9606 GN=SF3A1 PE=1 SV=1	4.97	88943.4	4355.29	Q15459	33	54.1	0	SF3A1_HUMAN	12609.7	11916.7	10930	36649.3	36708	39458.7	34022.3	36367.3	37580	31368	29765	31439.3	14332.3	14889.7	17027.7	9941	11480.3	13176	12243.7	13422	13690.7	41064.3	40974.3	40686	41145.3	42609	42661.3	37915.3	38618	37825.7	23276	24219.3	24769.3	11264	10691	10405.3	9275.67	9329.33	8521	7966	8419.67
ERO1-like protein alpha OS=Homo sapiens OX=9606 GN=ERO1A PE=1 SV=2	5.37	55248.1	4353.61	Q96HE7	22	48.72	0	ERO1A_HUMAN	23057.7	24342.3	25128.3	27535.3	26979.7	28022.3	29885.3	28498	29088.3	35000	31215.7	32734.7	26237.3	26000	28758.3	23043.3	21498.3	23192.7	25488	27759.7	29142.3	24469	22243	21505	22579	24172.3	22135.7	22861.7	23006.3	20792.7	19432	18230	17034.3	14973.3	13673	13977.3	14175.3	15597	16114.3	19789.3	21121
U1 small nuclear ribonucleoprotein A OS=Homo sapiens OX=9606 GN=SNRPA PE=1 SV=3	10.49	31279.6	4331.94	P09012	9	35.82	0	SNRPA_HUMAN	31478.1	31565.2	39477.5	18027.7	17164	21485.5	16045	17118.3	18885.2	20099.6	21071	27886	19165.2	23446.5	32879.3	30390.1	27865.6	28649.8	23882.7	26046.1	26604.9	27727.9	26841.4	28419.5	28863.5	30300.4	28800.7	28614	29170.2	29995.4	45264.1	47047.9	46007.3	50057.3	49921.5	49985.1	46909.7	45824.9	47232.4	29534.5	28410.2
Electron transfer flavoprotein subunit alpha_ mitochondrial OS=Homo sapiens OX=9606 GN=ETFA PE=1 SV=1	8.5	35421.8	4310.58	P13804	10	37.54	0	ETFA_HUMAN	87746	69058.7	87999	68310	75338.7	61689	74130.3	87264	87246	76114	91335.7	80410	66851	71670.7	86956.7	50812	50487	50348	65450.7	52898	75143.5	80070	67883	67112.3	57852.3	65249.7	57406	52011	53295	50939.7	64893	62416.7	64039	70186	60664.3	67310.7	99196.3	77532.7	88203	55443	46620.3
60S ribosomal protein L18 OS=Homo sapiens OX=9606 GN=RPL18 PE=1 SV=2	12.22	21748.6	4308.18	Q07020	5	28.19	0	RL18_HUMAN	13274.7	15947	13209.3	27897	28061.3	36598.3	24645.3	34961.7	38760.3	19256	17386	26666	15264.5	14964.5	14807	9735	7901	7066	27947.7	28163.3	26222	10207.5	15766	10467	12766.3	18323.5	13081.7	15997	11929.7	12134.3	20041.5	18531.5	14432	16662	15923	15674				20742.3	20195
Serine--tRNA ligase_ cytoplasmic OS=Homo sapiens OX=9606 GN=SARS PE=1 SV=3	6.04	59290.6	4302.67	P49591	20	49.42	0	SYSC_HUMAN	7897.67	8593	7327	34838	34027	30995.7	34356	35628	32845.7	33133.7	31324	28235.3	5539.33	5502	5097.67	3056	2756.33	3056.67	3809.67	3230.33	3317	32691	33506	33590	30301	31048.7	31269.3	30971	31856.3	32626.3	27636.7	27554.3	26947.3	10642.7	10619.7	10605	4816	4937	5080.33	4498	5147
Ras-related C3 botulinum toxin substrate 1 OS=Homo sapiens OX=9606 GN=RAC1 PE=1 SV=1	8.58	21849.3	4298.6	P63000	4	16.67	0	RAC1_HUMAN	6720.5	9696	8170	14759.1	15279.2	17676.5	13746.4	13989.8	16962.8	16012.8	14572.3	17577.4	3321	2316	3390.67	3242		3972				34586	34178	25447.4	22422	20140.5	22478	24292	22497.5	22257	19626.5	18476.8	18016.5	8024.33	10087	7268.33	4491	4288	3826.5
DnaJ homolog subfamily A member 1 OS=Homo sapiens OX=9606 GN=DNAJA1 PE=1 SV=2	6.7	45609.6	4296.51	P31689	14	42.32	0	DNJA1_HUMAN	4678.33	4571.33	4045.5	13425	13291	13308.7	10903	10789.7	10096	8977	8201.33	7807.67	5420	5093	4802.67		2594	2630	3177	2829	2537	32582	28517	33075.7	28182.3	26680	27218	24861.3	23161	21199	17200.7	17034.7	16156.3	13024.3	12739	13103.3	5799	6559	7418.5	7450	8434.5
Alpha-actinin-2 OS=Homo sapiens OX=9606 GN=ACTN2 PE=1 SV=1	5.16	104424	4285.84	P35609	28	32.44	0	ACTN2_HUMAN	11148.9	11432.2	11617.2	19611	19619.7	17732.7	16323.3	15480.7	14717.7	19224.7	16971.7	15272.9	9176.9	9178.94	10718	12706.2	35002.3	11905.5	6617	7942	8932.33	40048.3	39176.3	37637.1	34928.3	33421.3	33615.7	33363.8	32818	32647.6	29941	29880	28112.5	18686.7	18295.1	17169.8	8384.01	7911	9241.67	3864.25	4544.67
Heat shock protein 105 kDa OS=Homo sapiens OX=9606 GN=HSPH1 PE=1 SV=1	5.11	97777.6	4281.84	Q92598	32	43.47	0	HS105_HUMAN	18925.3	12818.3	17944.7	22129.7	22270.3	21417.7	23343.3	23970.3	31224.7	19842	26953.3	27692.3	31859	33775	24202.7	7307.5	6205	5322.67	3383.33	3370	4127.33	38104.3	38314	38695.3	37652.3	36942.3	36854.3	38171	39474	36585	13848	14829.3	13929	11971.7	12057	11542.7	11096	7111.67	6390.67	6897	9941
Reticulocalbin-2 OS=Homo sapiens OX=9606 GN=RCN2 PE=1 SV=1	4.06	36933.5	4281.11	Q14257	15	53	0	RCN2_HUMAN	17488.7	18400.3	16553.3	15131.3	16317.3	17570.3	12884.3	14035.7	15799	18521	19365	21172.7	24513.3	25178	25313	19272.7	19318	21346	23944	25164	26877.3	18169	18217.7	17200	15481	13772.3	15018.3	13885	13863.3	12663.7	17814.7	16081.3	15559	30197.3	30304.7	28469	23641.3	25907.7	24846.3	24889	22227
Glutamate dehydrogenase 2_ mitochondrial OS=Homo sapiens OX=9606 GN=GLUD2 PE=1 SV=2	8.61	61776.3	4277.78	P49448	22	37.81	0	DHE4_HUMAN	32255.5	33319.4	34574.1	13099.7	21037.3	16682.3	21807.6	21980.2	19871.6	28516.9	21534.7	25136.7	21288	22157.8	24425.1	11964	11083.6	12157.8			3666.5	6353.07	6496.76	6610.73	9478.23	9882.65	10027.5	6767.62	6468.62	6913.38				3881.3	4045.69	4177.43				4185.33	3612.33
Cytosol aminopeptidase OS=Homo sapiens OX=9606 GN=LAP3 PE=1 SV=3	7.92	56565.6	4266.19	P28838	29	56.07	0	AMPL_HUMAN	26425.7	26012.7	25430	17974.3	16678.7	16794	17653.3	19210.7	16815	19806	20873	23068	27319.3	27674	30652.3	33027.3	33134.7	35438.3	35335.3	35136.3	38446.3	17743.3	17157.3	16952	16164.7	17402.7	15993.3	17510	19186	18097	24454.7	26062.7	25613.3	33079.3	35172.7	36340.7	37983	39573	38003	36097	31812
Mesencephalic astrocyte-derived neurotrophic factor OS=Homo sapiens OX=9606 GN=MANF PE=1 SV=3	8.83	21156.4	4257.38	P55145	6	28.02	0	MANF_HUMAN	13866	14465.3	13970.3	16230.3	19184	13495	15183.7	18000.7	13357.3	18431.7	15950.3	13482.3	27037.7	27797.7	20543.3	27797.7	25113.7	21933	37540.3	39089.7	32054.7	14913.7	14346.7	14602.3	17061.3	17316.3	16529.7	17354.3	17026.7	15921.3	14920.3	14525	14769.3	16733.3	16912	16809.7	24180	24051.7	22039.7	37797	36099.7
PDZ and LIM domain protein 1 OS=Homo sapiens OX=9606 GN=PDLIM1 PE=1 SV=4	6.63	36528	4231.55	O00151	16	60.49	0	PDLI1_HUMAN	36454.7	36254.3	36848	28600	28477.7	24318	27378.3	26452	21315	34496	32530.7	30138.3	33199.3	32372.7	26754	43586	39273.3	31749	44047.3	39822.7	37566	24966.3	26011	24764.3	26355.7	22716.7	24964.3	25860.7	26476	24948	31847.3	29066.7	28148	37711.7	35869	34783.7	49355.3	42912.7	42006.3	50051.7	48092.3
Pyridoxal kinase OS=Homo sapiens OX=9606 GN=PDXK PE=1 SV=1	5.72	35330.5	4217.65	O00764	8	30.13	0	PDXK_HUMAN				6838.67	8039.33	6748.67	4976.33	7040.33	5784	5502	8193.33	7391.33	3779	5605	4055		2922		3910	2887		2564.5	3740	2363	9222	4883	5255.5	7300	3920	2446.5	1928	1698	3178	9973
Serine/threonine-protein phosphatase PP1-beta catalytic subunit OS=Homo sapiens OX=9606 GN=PPP1CB PE=1 SV=3	5.79	37985.3	4217.06	P62140	11	37.92	0	PP1B_HUMAN				3676.58	4113.13	5514.88	2277.95	2384.37	4281.36	1136.74	1411.3	2223.06										3893.13	4136.46	4040.1	5195.5	4473.79	5801.39	2798.31	2674.67	2397.27	2143.88	1934.53	1850.21	3135.18	2614.52	2458.54
Putative RNA-binding protein Luc7-like 2 OS=Homo sapiens OX=9606 GN=LUC7L2 PE=1 SV=2	10.69	46970.2	4198.21	Q9Y383	11	28.83	0	LC7L2_HUMAN	8434.67	7591	7830.67	18073.7	16215	22366.6	19401.1	17671.9	23066.4	11868.8	11102.7	15175.1	9044.47	8316.97	11861.2	7215.33	6903	7607.16	9523.67	9567.01	11443.4	27180.6	27483.4	28602.1	26844.5	30625.1	27583.6	24769.6	27202	25652.4	16415.2	16357.9	16048	15697.5	16124.2	15743.6	17458.2	16426.2	16211.2	20612	19742.2
Heterogeneous nuclear ribonucleoprotein A0 OS=Homo sapiens OX=9606 GN=HNRNPA0 PE=1 SV=1	9.65	31011.7	4194.92	Q13151	9	36.72	0	ROA0_HUMAN		3639	3305	11859.7	12389.3	15503	6398.33	8114	6561.67	5054	5282	2615.33	2902.67	4052.67	2979		3367	2070.5	3310	3820.67	4992.33	17287.3	16927.3	16248	23476.7	22274.7	22986.7	12809.7	13053	11426.7	4457	5647	5958.5	4593.5	4490	4607.5		2785	2432	8107	7336
Histidine--tRNA ligase_ cytoplasmic OS=Homo sapiens OX=9606 GN=HARS PE=1 SV=2	5.58	57980.9	4191.93	P12081	17	31.43	0	SYHC_HUMAN	17271.7	17790.3	25356	26120.3	25751.7	20635.7	23274	24477.3	21558.7	14994.8	15929.7	14893.7	11568	12153.8	11325.1	21466	21655	18524.3	28463.5	29246	17994	19057.9	17896.8	17102.5	16763.4	16060	14284	16057.5	16261.1	15939.8	4897.33	4861.33	4575.33	6355.33	7142.33	6363.33	4557	4182	4492.67	3934.21	3887.05
Platelet-activating factor acetylhydrolase IB subunit gamma OS=Homo sapiens OX=9606 GN=PAFAH1B3 PE=1 SV=1	6.4	25848.3	4187.68	Q15102	11	71.86	0	PA1B3_HUMAN	6566.5	6387	5952	20125	19415	15360.3	17853.7	15641.7	12571.7	9821.33	10414.3	7784	7055	7712.67	7277	4034	4374.33	4448	7198.67	6656.33	5691.5	22367	22205.7	21015.7	16942.3	18575	17406.3	17218.7	16758	17626.7	8676.67	9250.33	8719.67	6696.67	7501.67	7834.33	5836.67	6810.33	5407	6999	8353
Serine/threonine-protein phosphatase PP1-gamma catalytic subunit OS=Homo sapiens OX=9606 GN=PPP1CC PE=1 SV=1	6.13	37725.2	4182.08	P36873	6	19.2	0	PP1G_HUMAN	11661.2	12239	12179.9	17492	18690.6	21256.8	15520.9	16962.6	18063.8	18752.8	18921.5	19978	10160.4	12783.1	11914.8	5883.81	5949.94	6926.59	3982.63	4138.4	4802.23	27847.5	26055.3	24310.6	20582.3	19731	18814.9	22571	21548.8	19629.5	20172.4	19219.5	19547.3	16748.6	15792.9	15368.3	5737.42	5835.12	5158.42	7999	7694
Leucine--tRNA ligase_ cytoplasmic OS=Homo sapiens OX=9606 GN=LARS PE=1 SV=2	6.96	135664	4170.22	Q9P2J5	44	43.62	0	SYLC_HUMAN				26784.3	27730.7	25607	10390.7	10414.7	9356.33	3161.67	2817	2804.33			2051.67						2320	31814	33866.3	29909.3	24829	26350.7	26251.7	12493	12479.7	12858	2670.33	2924.67	3066	3346.33	3438.67	3446.67	2588	2780		5857.67	5906.67
Actin-related protein 2 OS=Homo sapiens OX=9606 GN=ACTR2 PE=1 SV=1	6.33	45046	4156.27	P61160	15	37.56	0	ARP2_HUMAN	34310	35739	36441.3	30961	30003.7	32246.3	32437	33541.7	34594.7	40120.7	41797	43463.3	35767.3	37869.7	35930.7	19307	19679	19050.7	8121.67	7546	8062.33	37360.3	36368.3	35727	33980.3	30687.3	34321	35509	36364.3	35366	46964	45536.3	45292.3	48875.3	46053.3	44311.3	29796.3	27211	23649.7	8602.67	8198.67
Dynein light chain 2_ cytoplasmic OS=Homo sapiens OX=9606 GN=DYNLL2 PE=1 SV=1	7.26	10463.9	4154.39	Q96FJ2	3	25.84	0	DYL2_HUMAN				8026.16	9077.56	7645.89	5465.18	6013.99	4634.78	8204.69	8376.39	9984.88	6779.2	6617.23	7506.9	4866.64	4247.09	6333.89	4416.69	3691.2	5278.06	13278	11830.4	11742.7	10833.3	10428.9	10193.3	3704.95	4614.61	3970.82
Histone acetyltransferase type B catalytic subunit OS=Homo sapiens OX=9606 GN=HAT1 PE=1 SV=1	5.38	49911.9	4138.48	O14929	11	31.03	0	HAT1_HUMAN	5906	7738	6918	18546.3	17511	14706	19196.7	18997	19596.7	12461.7	13484	15270	5828.67	5641.33	4846.33	6580	5836	4320.5	4704	6199	2339	16720.7	16215	14619.7	16626.3	14758	15989.7	16919	16327	13131.3	6806	6749.33	6332	5360.5	3587	4419.33	2761	2808	3049	2613
Pachytene checkpoint protein 2 homolog OS=Homo sapiens OX=9606 GN=TRIP13 PE=1 SV=2	5.69	48893	4133.9	Q15645	17	45.14	0	PCH2_HUMAN				13614.3	15219	15648	10289.3	10771.3	10739.3	5259.67	4961.67	4436	3303	2578	2200.5			4915			5269	14680.3	15257.3	15455	12472.3	12704.3	12086	8774	10347	9909.33	2485.33	2922.67	2906.33	4009	2672.33	2422.67	7041	7161	5194.5	8566.67	9258.33
Pyruvate kinase PKLR OS=Homo sapiens OX=9606 GN=PKLR PE=1 SV=2	7.64	62229.5	4129.93	P30613	9	18.82	0	KPYR_HUMAN				2718.16	2751.53	2696.62	2407.55	2372.88	2513.01	2395.91	2968.93	3627.68	1927.77	1982.8	2022.72	5711.1	5443.24	6767.54				2700.07	2472.79	2778.05	3045.13	3672.06	3303.07	3352.69	3356.69	3450.18	5773.5	5859.49	6045.78	4996.87	5089.1	5197.22
ADP-ribosylation factor-like protein 3 OS=Homo sapiens OX=9606 GN=ARL3 PE=1 SV=2	7.1	20626.6	4117.56	P36405	9	55.49	0	ARL3_HUMAN	20854	19465.7	21016.3	20422.7	21677	14653.3	20021	22634	14512.7	25599.7	23186.7	16995	18058.3	16956	14724.7	11663.7	10934	8566	8525.33	9557.67	7658	15385.7	16047.7	17083.7	15286.7	15802.3	15988.7	15476.7	16897.3	16905.3	19527.3	18633.3	20516.7	18382.3	16936.7	16420	13416.5	11453.5	15068	12116	10508.5
Ras-related protein Rab-13 OS=Homo sapiens OX=9606 GN=RAB13 PE=1 SV=1	9.72	23002.3	4102.19	P51153	5	24.14	0	RAB13_HUMAN				3409.74	3000.47	4175.33	2856.07	2703.3	3523.46	1636.42	1444.68	2320.76										4813.67	4514.33	4247.67	3561	3311.67	3607	3899.33	3625.33	3628.67	2741.99	2694.42	2703.42	5051.24	3886.64	5030.35	14620	14651	14259
Protein CDV3 homolog OS=Homo sapiens OX=9606 GN=CDV3 PE=1 SV=1	6.04	27334.9	4100.91	Q9UKY7	14	67.83	0	CDV3_HUMAN	9532.67	9111.33	8182.67	7512.67	7081.33	7446	7482.67	7312.67	7688.67	8786.67	8640.67	11128.3	9920.33	8814.67	11401.7	12841.7	12599.3	16107.3	17017	15580.7	19470.3	12848.7	12164.3	11430.3	13652.7	10664.7	12025.7	13960	13519.7	12284.7	18819.7	17814.7	16185.3	19627	25988.3	26697.3	40292.7	38548.7	35515.7	52450.7	50538.7
U2 small nuclear ribonucleoprotein B'' OS=Homo sapiens OX=9606 GN=SNRPB2 PE=1 SV=1	10.33	25486.4	4092.33	P08579	7	31.11	0	RU2B_HUMAN	34127	28798.3	28685.7	32280.7	28567.7	18028.9	28030.3	26092	16681.3	30653.3	29261.3	18854.4	36707.7	34806	18649.2	17781.2	18418.1	10950	12305.9	17307.9	17944.3	12387	15913.2	16561.8	14756.2	16385.8	15773.8	15885.7	15665.5	15805.6	20131.2	19354.4	15842.5	21441	19416.1	18699.9	10810.7	11475.5	12847.9	7669.65	8756.85
ATP-binding cassette sub-family E member 1 OS=Homo sapiens OX=9606 GN=ABCE1 PE=1 SV=1	8.32	68283.9	4089.52	P61221	22	41.24	0	ABCE1_HUMAN	80549.7	71876.7	72347.3	48103	47768.7	57221	57576.3	56642	62092.3	65652.3	62340.7	68493.7	65134	62162	65428.3	57731.7	54639.7	56069.7	60325.3	54972.7	68625	60576.7	55702	55348.3	56482	57486.3	58155.3	54684.3	58195	60155	69987.3	75556	74266	60759.3	64450	67920.3	77122	75526.3	79619	68021	70355
Dihydropyrimidinase-related protein 3 OS=Homo sapiens OX=9606 GN=DPYSL3 PE=1 SV=1	6.06	62362.6	4087.57	Q14195	15	38.25	0	DPYL3_HUMAN	13446	13106	13228.7	12436.7	11951	12391.3	12553.3	12188.3	12364	14398	14152.7	13830.7	10848.7	10756	11639.7	9708.33	9821.67	9464.67	3247.32	3067.4	5046.67	15118	15305.3	14655.7	14891.8	13433	14643	15904.2	15869	14953.7	15862.7	16340.6	15417	16021.3	15907	15246.7	11962.7	11654	9621	1928.04	1969.83
TATA-binding protein-associated factor 2N OS=Homo sapiens OX=9606 GN=TAF15 PE=1 SV=1	8.07	62058.1	4086.03	Q92804	12	19.93	0	RBP56_HUMAN	19180.9	20776.4	17908	14704	13295.2	15435.1	12444.3	11877.2	12256	14411.6	14973	16083	16362.1	15410.6	18831.6	43007.2	43790.6	60177.7	20946.9	21548.9	26553	16549.5	17750.2	17668.6	17820	19099.4	18456.8	14447.1	15601.5	15999	16890.1	16750.9	17044.6	17089.4	17458.9	20427.9	21233.3	20009.6	18230.1	26644.5	24513.8
Cytosolic non-specific dipeptidase OS=Homo sapiens OX=9606 GN=CNDP2 PE=1 SV=2	5.59	53220.7	4083.15	Q96KP4	18	45.26	0	CNDP2_HUMAN	21907	19585.7	17178.3	25161.3	21979	24994.3	22845.3	21844.7	23258	23560	23657.3	25319.7	20029.3	22737.3	22618.3	19693.7	19122.3	19716.3	17069	17738.3	18660.7	24155.7	22584.7	23891.7	26563	25260	25745	24953.7	26089.3	24947	31970.3	31378.3	31733.3	34888.3	33061.7	29621.7	46624	43364.7	38858.7	43277	41104
Keratin_ type II cytoskeletal 3 OS=Homo sapiens OX=9606 GN=KRT3 PE=1 SV=3	6.1	64588.2	4076.16	P12035	22	27.71	0	K2C3_HUMAN				3630	3530	2756	6019.64	5629.45	9283.33	4030.21	3456.75	5218.58	1748.8	1622.18	3452.67	7389.9	7237.39	10069.6	2344.78	1927.07	2835.21	5848	5242.67	4511	4769.67	6031.33	4729.67	5159	5071.33	5521.67	3049.67	3334.33	3841.67	12441.6	13564.7	13502	4096.39	3861.84	3120.91	3201.04	2840.24
Bleomycin hydrolase OS=Homo sapiens OX=9606 GN=BLMH PE=1 SV=1	5.85	53189.7	4071.33	Q13867	16	36.04	0	BLMH_HUMAN	50287	43221	45411.7	37103.3	37076.7	36198.3	36192.7	36386	29691	49705.3	45655	38027	43211.7	42367.3	30809	68016.7	60764.7	56901.3	50186.7	51880.3	46053	36664	35509	35882	31488.3	31591.3	30971	33358.7	32615	31520.7	44069	41701.7	41845.3	50847.3	47918	45339.7	44547.7	44432	40115.7	26569.7	26712.7
Peptidyl-prolyl cis-trans isomerase F_ mitochondrial OS=Homo sapiens OX=9606 GN=PPIF PE=1 SV=1	9.94	22382.4	4069.27	P30405	8	35.75	0	PPIF_HUMAN	4947	1707.61	2838.85	9746.52	11463.1	12658.8	8267.67	9029.57	10490.9	8427	9251.42	10487.8	2576.37	2777.28	4055.19	557.479	475.116	1887.99				8935.14	9329.39	7521.54	12073.5	9785.28	10818.7	12342.2	11136.4	11948.5	7935.68	7660.18	8183	5729.42	5667.97	5744.34	1999.85	2321.84	2816.2	3438.18	3507.13
Probable serine carboxypeptidase CPVL OS=Homo sapiens OX=9606 GN=CPVL PE=1 SV=2	5.27	54449	4066.66	Q9H3G5	13	32.35	0	CPVL_HUMAN	29377	28549.3	27568.3	19414	20157.3	25349.7	19964.3	20206.7	26445	27144.7	23929.3	30720.3	25813	25328.7	29742	38956	35429	37537	35417.3	36149.3	38839.3	15733.3	16915.7	16921.3	15667.7	15329.3	16354.7	16186.7	15949.7	17633.7	18087.7	18549	18476.7	14583.3	15349	14861.3	19630.7	18025	18412	16314.3	14966.7
40S ribosomal protein S23 OS=Homo sapiens OX=9606 GN=RPS23 PE=1 SV=3	11.22	15978.7	4063.69	P62266	3	23.08	0	RS23_HUMAN	4528.67	4723.5	4252	11808.3	11341.7	9480.5	9416.67	8930.67	8176.5	7329.33	7104.67	6403	3967.5	3536	5032	2814.5	2980	3406	5813	6313	7239.5	8851	9414	9027.5	10438.5	10925.5	10314	8689	8867.5	9231.5	9049.5	9293	9457.5	5697	5748	3156	2518		2586	9069	8829
Valine--tRNA ligase OS=Homo sapiens OX=9606 GN=VARS PE=1 SV=4	7.37	141731	4052.71	P26640	45	39.32	0	SYVC_HUMAN	18501.7	17808.7	16972.7	27840.7	25979.3	32216.3	23915	21713.7	26673.3	19020.3	17744.3	18650.7	19218.3	21533	19788.3	11005.3	11073.7	10692.7	11409.3	11647	10158	45518.7	46037.3	45595.3	41311	42499.7	41731.3	32313.3	32540.7	33382.7	15240.3	14726.7	13862.7	15623	16517.7	15486.7	13160.3	13539	12483	10230	10819.3
116 kDa U5 small nuclear ribonucleoprotein component OS=Homo sapiens OX=9606 GN=EFTUD2 PE=1 SV=1	4.66	110405	4041.3	Q15029	39	53.19	0	U5S1_HUMAN	32638.3	30713	30066.3	15732	16693.3	14933	18054.7	17310	15726	23663.7	24799	24659.7	33510	32829.7	29656.3	13887.2	13704.8	12538.8	7031.06	7307.5	7227.23	20635.7	20514.7	20218.3	18061	17829.3	18145.3	17373	19228.7	17275	31581.7	31267.7	31554	40981.7	37895	40282.3	19218.4	19333.2	19221.7	12349.2	12092.5
Developmentally-regulated GTP-binding protein 1 OS=Homo sapiens OX=9606 GN=DRG1 PE=1 SV=1	9.3	40827.3	4032.93	Q9Y295	16	44.96	0	DRG1_HUMAN	5510.67	6169.33	5608	18202.7	17235.3	17107.7	18911.7	20013.3	16549.7	18057	17280	14382.3	8145	7799	7314.33	4800		5067	6068	7075	7634	12707.7	12713.3	13331.7	11699	12534.7	13436	12069.3	12407	11623.3	11313	11481.3	11640.3	7837.67	7749	8483.67	3072	3490	5872	2621	2822
Acetyl-CoA acetyltransferase_ cytosolic OS=Homo sapiens OX=9606 GN=ACAT2 PE=1 SV=2	6.52	41864.2	4025.24	Q9BWD1	13	39.29	0	THIC_HUMAN	29310.7	24965	25026.3	26257.7	25638.3	19763.3	20570.7	21297.7	17303	27430.3	25038	19646.3	17708.7	17239.3	17001	26295	22412.7	18336.7	7700.33	7994.67	6963.67	11629	12359	13007	11342	13161.7	12779.7	12586	12577.3	14438.7	16712.7	18797.7	18977	17158.3	18765	18854.3	18772.7	14894.7	14850.7	7489	6004.67
Ras GTPase-activating-like protein IQGAP1 OS=Homo sapiens OX=9606 GN=IQGAP1 PE=1 SV=1	6.07	189880	4020.49	P46940	61	46.71	0	IQGA1_HUMAN	8699.5	13050	12795	22081	21934.3	19221.7	21930.3	23483.7	20654	12177.3	12747	12173.3	5862.67	6358.67	9873.67	6418.5	6636	5662.67	7370.5	6107.33	7013	13795.3	13574	12797.3	12320.3	12267	11725.3	11447	11371.3	11302.3	6485.67	7032.67	7468.33	9022.67	9115.33	7084.67	5640	5320.5	4315.67	7624	7911.67
Nuclear ubiquitous casein and cyclin-dependent kinase substrate 1 OS=Homo sapiens OX=9606 GN=NUCKS1 PE=1 SV=1	4.79	27296.4	4020.45	Q9H1E3	12	51.44	0	NUCKS_HUMAN	36302	42504.3	35192.3	29167.3	26200.3	18313.7	27972	28115.7	17357.3	35926.3	33604	22234	48612	47489.3	27112	57910	58649.3	35362.7	63577.7	67446.7	49923	13207.7	12931.7	15873.7	37930.7	37874.7	41553.3	75332.3	68804.7	74690.7	37381.7	35025.7	29115.3	44056.7	40360.7	36316	24608.3	26362	24194	29525.3	43688
Keratin_ type II cytoskeletal 1b OS=Homo sapiens OX=9606 GN=KRT77 PE=2 SV=3	5.64	62186.6	4016.34	Q7Z794	23	35.99	0	K2C1B_HUMAN	15356.5	8830.66	13259.8	17500.3	17052.2	17811.8	18373	17634.3	18318	16578.3	15176.6	11225.4	28515.4	28700	30364.9	9902.73	8426.84	9872.33	12179.2	11748	13714.8	12978.8	13308.8	13346.3	9086.16	9403.92	10029	9405.32	9322.46	9398.05	4389.07	4825.17	6420.11	4009.79	4679.96	4915.27	8795.39	14274.5	10754.4	3620.96	3485.45
Leucine-rich repeat flightless-interacting protein 1 OS=Homo sapiens OX=9606 GN=LRRFIP1 PE=1 SV=2	4.39	89880.5	4010.52	Q32MZ4	29	36.76	0	LRRF1_HUMAN	19458	18680	15334.3	13251.7	12323.3	13923	10617.3	10574.3	11878.7	13962.7	11549	16329.3	18623.3	19446	22666.7	21383.7	21546	24758	24404.7	23074.3	28381	11912.7	11716.7	11770.7	11199	9655.38	10668	10654.3	10830.3	10907.7	14289.2	14526.5	14077.1	18606.3	20207	17476.3	29866.7	29272	27645.3	28157.6	29254.7
Prefoldin subunit 3 OS=Homo sapiens OX=9606 GN=VBP1 PE=1 SV=4	6.98	22797	3998.28	P61758	11	53.3	0	PFD3_HUMAN	24499.3	23898.3	23387	16872	20321.3	21441.3	12065.7	18277.7	18756.7	21537	22936	25108	20794.3	26061	25297.7	20628.3	19836	20959.7	13344	14069.7	14458.3	17372	16051.7	24877.7	22024.7	19746.7	20115	19814.7	20130.3	18919.7	32554	30877.3	31388.7	32696.7	33937.7	33555.7	32646.7	30421	28881.3	24164.3	23221.7
Glycogen phosphorylase_ liver form OS=Homo sapiens OX=9606 GN=PYGL PE=1 SV=4	6.77	97548	3993.16	P06737	47	54.07	0	PYGL_HUMAN	26046.7	24030.3	26160	20015	19797	19649.7	27113	24255.3	25061	30095	28951	28591.3	22901.3	22641.7	23196	11546.7	11173	10737.3	8596.33	7531.67	7878	15393	14054.3	13606.7	12788.3	12873.7	12425.7	13235.7	12642	12233	16374.3	15364.7	15901	13404.3	13837	12551.3	6107.33	9902	7507	3210.73	1971.32
Eukaryotic translation initiation factor 3 subunit C OS=Homo sapiens OX=9606 GN=EIF3C PE=1 SV=1	5.36	106028	3991.39	Q99613	27	32.64	0	EIF3C_HUMAN	5457	4924.67	4412	31094.3	33126.3	32637.7	23760.3	23729.3	25483	8103	7467.33	7913	5016.67	5688.67	5682.33	3190.5	3709	5532.67	4106.5	3989	5976	42254.3	44909.7	42098.3	37708.7	40862	40305	33607.7	32587.7	34467.7	15335	9076.33	8910.67	14631.7	9725	9705.67	7996.67	8256.33	7940.33	9632.67	9899
Acidic leucine-rich nuclear phosphoprotein 32 family member E OS=Homo sapiens OX=9606 GN=ANP32E PE=1 SV=1	3.55	30920.6	3985.5	Q9BTT0	6	24.63	0	AN32E_HUMAN	21612.3	20438	20640.3	27980	29308.3	28508	18778.7	20106.7	18231.3	20904.3	18562.3	18158.3	20507.7	19708.3	18254	28684.3	25379.7	24214.3	29958.3	29444.3	27880	21054.7	21345.3	21092.3	19158.3	20433.7	19522	15794.7	15275	14705.7	11577.3	11901.3	11685	11552	11513.7	11210.3	11265.7	11565	10950	13465	13374.7
Annexin A7 OS=Homo sapiens OX=9606 GN=ANXA7 PE=1 SV=3	5.36	53024.5	3984.89	P20073	21	36.68	0	ANXA7_HUMAN	10971	14139	11937.5	25960.7	25496.3	25467.7	26143.3	26508.7	26256.7	21297.7	20807.3	23274.7	4598	6516.67	8558.67	5304	14292	10490.3	3002	8267	5260.67	21220.7	20158.3	19473.7	19505	19737	20027	19964	19942.7	20388.3	13763	13152	14333.7	5400.33	7784.33	12556.7	3411.5	9375.33	13172	4160.33	3093.5
F-actin-capping protein subunit alpha-2 OS=Homo sapiens OX=9606 GN=CAPZA2 PE=1 SV=3	5.49	33177.2	3979.95	P47755	13	63.29	0	CAZA2_HUMAN	17465.5	20385.1	17974.5	21283.6	21482.3	23374.5	22413.2	22797	24641.4	26339	25596.4	27574.8	16019.3	15177.7	16908	9674.44	10199.5	11006.9	9152.41	8890.49	10696.2	22847.9	23142.5	23458.5	20909.9	22542.7	20519.3	20751.8	20527.8	21033.4	23480.3	23433.9	22764	19915.8	22253.6	22527.8	18467.2	20811.5	23099.4	14316.3	14833.3
Histone H3.1t OS=Homo sapiens OX=9606 GN=HIST3H3 PE=1 SV=3	11.69	15622.3	3973.97	Q16695	4	15.44	0	H31T_HUMAN	37436	34420	32383	15755	14605.7	16769.3	12477.3	11466.5	12249.3	10163.7	12366	10444.3	11478.5	8091	14341.5	19553	17859	20065	30805	21651.5	19726.5	35027	31175.3	31858	36921.7	40689	36284	36265.3	36508.3	37154.7	43338.3	42679.7	44950.3	36052.7	36567.7	39234	26755.7	28820	29447.7	70314.7	72682
E3 ubiquitin-protein ligase CHIP OS=Homo sapiens OX=9606 GN=STUB1 PE=1 SV=2	5.53	35312.5	3971.75	Q9UNE7	9	30.03	0	CHIP_HUMAN				10985	11269.5	12919.7	4923	4976.33	4959	2577.5	2173	2514		2427	2083			2369			2982	16673.3	17202.7	15776.7	16072	15899	16407	11690.7	11348.7	11717.7	3407.33	3480.33	3464.67	3558	3211.5	4071	4841	3727	3113	7827	6586
D-aminoacyl-tRNA deacylase 1 OS=Homo sapiens OX=9606 GN=DTD1 PE=1 SV=2	8.44	23594.7	3971.57	Q8TEA8	6	23.92	0	DTD1_HUMAN	18154	19731	19687.3	9516	8865	10480.7	10362.3	9383.67	7830.33	15432.7	13601.7	15017.7	18621.7	18418	18558.7	25376	25876.7	23871.7	27240.3	27540.7	27627	10006.3	10878.3	10214.7	11922.3	12688.7	12514.7	13787.3	13633.7	13174.3	19291.3	19816.3	19984.7	21246.3	20264	20921	26199.3	25573.3	24952	23684.7	22535
PEST proteolytic signal-containing nuclear protein OS=Homo sapiens OX=9606 GN=PCNP PE=1 SV=2	7.79	18924.9	3970.23	Q8WW12	7	42.7	0	PCNP_HUMAN	9517	16046	11134.5	5713.67	5114	5660.67	6853.67	2653	4619	6421.67	6503.67	6418.33	5449	4908.67	7289.33	8299	8435.67	12256.7	11590	10474.5	11829.3	11028.3	10738.3	11127	12921	13331.7	13360	13239.3	13680	11719.7	17076	15095.3	17968.7	17311.7	18893.3	17635.3	18552	20284.7	18759.7	27438.3	24643
Farnesyl pyrophosphate synthase OS=Homo sapiens OX=9606 GN=FDPS PE=1 SV=4	5.78	48788.8	3967.98	P14324	5	11.93	0	FPPS_HUMAN	8866	8482.33	9025	73992.7	74520.3	81421.3	69137	68763.7	75566.3	19983.3	21112	22238	8223	8309.67	10385.7	6234.33	6985	7227.33	9714	9182.33	9760.67	51784	53684.3	50658	51383	49113	50482.7	46289	45202.3	44639	6481	6770.33	6153	6532.67	5990	6285	5628.33	5496.67	5137	10093.3	14265.7
Protein arginine N-methyltransferase 5 OS=Homo sapiens OX=9606 GN=PRMT5 PE=1 SV=4	5.88	73368.3	3927.93	O14744	20	31.71	0	ANM5_HUMAN	19453.7	18515.7	18456.3	42000.3	38671.7	34672	43592	40163.3	43493	50824	49957.3	50893.3	17859.7	17658.7	16777.3	2900.5	2980.5	3733.67	4531	3951.5	3692	63561	61643.7	58515	56770	53702.7	54802.3	57567	53665	53462.3	63717.7	61143	60656.3	36359	36018.7	35653	7928.33	7750	7821.33	8150.67	7969.33
28 kDa heat- and acid-stable phosphoprotein OS=Homo sapiens OX=9606 GN=PDAP1 PE=1 SV=1	9.56	20630	3923.66	Q13442	9	48.62	0	HAP28_HUMAN	12418.3	12737.7	11679	10744	10437.3	13209	11129	10851	14122.7	12205.3	11672.7	13770.3	19150	18445.7	19673.7	16728.3	16305.7	16042.7	25241.3	23591.3	26920.7	16691.3	17867.3	17410	17976	16523.3	18311.3	19873	21124	20761	18974	21029	19216	19925	20705.3	20449.3	27242.3	26750.7	25669.7	36239.3	35152.3
Extracellular glycoprotein lacritin OS=Homo sapiens OX=9606 GN=LACRT PE=1 SV=1	5.28	14246.1	3911.56	Q9GZZ8	3	22.46	0	LACRT_HUMAN									1384						2633							2247		1827	4610	5237	2545	5100	5377	4670	1942	1794	1792	2814	2429	2661
Gamma-glutamyl hydrolase OS=Homo sapiens OX=9606 GN=GGH PE=1 SV=2	6.76	36363.6	3911.18	Q92820	15	39.31	0	GGH_HUMAN	26544.7	23416.3	24279.3	14294.3	14244.7	14918.7	16071	15394	16368.7	17796.7	15253.3	17675	26534.7	18170	20599.7	30517.3	30369.3	29878.7	27887	28457.3	31032	8163.67	7720	7799	8394.67	8667	8540.33	8394	8368.33	8782.33	12337.3	12504.3	12369.7	14495.7	14979.3	15052.7	21348.7	21229.7	20926	14648	15605.3
Chloride intracellular channel protein 4 OS=Homo sapiens OX=9606 GN=CLIC4 PE=1 SV=4	5.3	29000.3	3891.86	Q9Y696	13	54.94	0	CLIC4_HUMAN	16943.7	16402.3	15622.3	22597.3	22236.7	28803.3	21347.3	23197.7	28967.7	27079.3	25424	30905.3	20626.3	18596.7	22713	21966	17957.3	13865	17677.7	15356.7	13146	24458.3	23178	22280.7	30295.7	27019.7	25097.7	27361.3	33266	30134.3	27864	26627.7	26280.3	44064	44566	37226	33559	23201	17725.7	18906.3	16158.3
Density-regulated protein OS=Homo sapiens OX=9606 GN=DENR PE=1 SV=2	5.01	22491.2	3887.46	O43583	5	22.22	0	DENR_HUMAN	25731.3	29579.7	24940.3	19565.3	17713.3	17043	19725.3	17760	15727.3	25518.3	23253.7	19855.7	31150.3	28993.7	23887	23596	22321.7	15719.3	22272.3	20667	16439.7	15226.7	14149.7	13607	19867.3	19252.3	19384.3	22332.7	22212.7	19960.3	28819	27601.7	27226	27572	25956.7	30146.3	21868.5	16954.3	21771	51824	25920.5
Huntingtin-interacting protein K OS=Homo sapiens OX=9606 GN=HYPK PE=1 SV=2	4.71	14665.5	3866.47	Q9NX55	3	42.64	0	HYPK_HUMAN				3309.5	4943.5	4359		3547		2871	7154.5	7758	2685	4775	2241										4071
Basic leucine zipper and W2 domain-containing protein 1 OS=Homo sapiens OX=9606 GN=BZW1 PE=1 SV=1	5.62	48214.4	3862.32	Q7L1Q6	23	43.44	0	BZW1_HUMAN	3519			17139.7	17142.7	21955.3	15349.7	15631.7	19594.3	6688.33	6110	8565	2930.67	3666.5	4589	2511	2957	2577	3173	4435	3805.67	31142.3	33422.3	32587	28638.3	28754.7	29375.7	25077.7	26968.3	26270.3	8169	8251.33	8150.67	6859.33	6552.67	7332	6775.67	6118.67	7280.67	11203.7	10990
Poly [ADP-ribose] polymerase 1 OS=Homo sapiens OX=9606 GN=PARP1 PE=1 SV=4	9.31	113882	3862.31	P09874	41	44.77	0	PARP1_HUMAN	11911.3	12183	9862.33	52612.3	46813.7	56971.3	40296	40437	42077	22882	20150.3	23225.3	12928.7	12947.3	13324	9412	9858.67	10644.3	17938	17204.3	17654	38488	38461.7	37674.3	33058.3	30222.3	31578.7	28576	28198.7	27925.3	11153	10928.7	9853.67	10589	10768.7	9730	7295.33	6918.67	6490	13592	12882.7
Protein S100-A13 OS=Homo sapiens OX=9606 GN=S100A13 PE=1 SV=1	5.84	11471.2	3847.81	Q99584	4	40.82	0	S10AD_HUMAN	12400	12731.7	13031.7	5550.5	6105	8412	11463.5	8982.67	9917.5	8333.5	9330	10475.7	14182	14314.7	15092.5	10703	13757.5	10071	11633.3	11278	10211.7	4312.67	4200.67	4506.67	4868.67	5262.67	5129	4382.33	5400.5	5007.33	6086.67	6244.67	6464.67	6819	6299.33	6559.33	5750	5820	8399.5	10317	9960
Probable ATP-dependent RNA helicase DDX5 OS=Homo sapiens OX=9606 GN=DDX5 PE=1 SV=1	9.18	69661.4	3841.73	P17844	29	42.83	0	DDX5_HUMAN	10491.5	7062.65	9713	13866.3	14478	15057.7	15152.3	13668	13908.7	9166.33	7752.67	11026	4986.33	5525.67	9355.67	4082	3958	3948.67	7991	7862	7045	20930	22101.7	23116	20138.3	22314	26023.7	18771	18450	19930.3	12411.7	13518	13624.7	12933.3	17720.7	13173.7	13634.7	13974.3	13716.7	16825	17355
HD domain-containing protein 2 OS=Homo sapiens OX=9606 GN=HDDC2 PE=1 SV=1	5.19	23561.6	3840.35	Q7Z4H3	11	53.92	0	HDDC2_HUMAN	16920.7	16101.3	15601.3	11698.7	12263.3	17407.3	11398.3	11226.3	14822.3	14092.7	13389.7	18347.3	13409.3	14605.3	16178.7	13069.7	12349.7	14197	9749	10757	13523.3	13869.3	13870.3	13083.3	14633	14169.3	14440.3	15067.7	15139.7	14346.3	17566.3	17838.3	17519.7	19834	18607.7	19042.3	19543.7	18596.7	17617	12950.7	12380.7
Keratin_ type II cytoskeletal 2 oral OS=Homo sapiens OX=9606 GN=KRT76 PE=1 SV=2	8.11	66411.1	3839.57	Q01546	20	29.47	0	K22O_HUMAN	3172.71	3117.94	3183.89	6057	6294.67	6558	4988.33	5438.67	4448	4066.79	3826	3977.42	3125.76	3211.04	2520.1	5338.09	4560.7	4665.11	3480.77	3488.23	3330.35	5527.61	5633.25	5335.45	6040.04	6196.21	6547.9	6044.37	6348.85	6587.19	5337.56	5481.5	5927.29	4882.46	5650.92	5515.79	405.926	1445.32	1239.75	5241.79	5303.52
Ras-related protein Rab-4A OS=Homo sapiens OX=9606 GN=RAB4A PE=1 SV=3	5.74	24674.8	3838	P20338	11	49.08	0	RAB4A_HUMAN	4611.41	9141	7286	4510.33	4151.33	4613.67	6648	5664	5899	6567	5445.67	5978.67	9237.5	5674	6280.33			2625.5				4395	4504.33	4541.67	5181.67	5533.33	5270.33	6716	6063.33	6667.33	6498	5946	6082	5946	6295.67	6904	4024	7546.5	10500	3204	4052
60S ribosomal protein L12 OS=Homo sapiens OX=9606 GN=RPL12 PE=1 SV=1	10.11	17989.7	3836.01	P30050	5	35.15	0	RL12_HUMAN	21460.5	19387.5	19280	17070.3	16719.3	17262.7	15845.7	16005	15901.7	16746.3	16342.3	16240.3	13047	13672	13170.7	14086	9958	9048	19064	13500.3	12451.3	7810.67	9176.67	8022	11112.3	10032.3	10758.7	11625.3	11815.7	11111.7	14597.3	14045.3	14582	12148	11998.7	12252	8486.5	8896.5	9205.5	27323	28814
Protein LZIC OS=Homo sapiens OX=9606 GN=LZIC PE=1 SV=1	4.68	21551.6	3816.93	Q8WZA0	15	61.05	0	LZIC_HUMAN	22015.7	21580.3	21607.7	21242	20078.3	14501.3	21017	21508	14163	24387.7	22135	16020.3	22683.3	20774.3	16623.7	19107	18176.3	18168.3	17705.7	19337.3	21214.3	17646.7	17187.3	16675.3	14807	15397.3	14962.7	15842.7	18069.7	16121	15857.7	17295	17959.3	14916.7	15722.3	15000.3	16635	18243	18262.7	21662.3	21083
L-xylulose reductase OS=Homo sapiens OX=9606 GN=DCXR PE=1 SV=2	8.13	26198.2	3812.43	Q7Z4W1	7	31.97	0	DCXR_HUMAN	14336	14663	15818.3	15048.3	16763	16222.7	14643.7	16752.3	15039	20117.7	20507.7	20785	9707.33	9784.67	10037.7	5682	5721	4515.5	3000	2845		28719.3	30487.3	27451.7	24261.3	25211.7	24121	24666	24369.7	25375.3	31434	31482	34409.3	23252.7	23286.3	23875	5871	6565	6011	6952	7273
40S ribosomal protein S25 OS=Homo sapiens OX=9606 GN=RPS25 PE=1 SV=1	10.84	13799.2	3806.18	P62851	3	22.4	0	RS25_HUMAN	10657	11775	10844	10456	10113	11976	8686	15292	11155	12029	11057	7802	10607	11029	8177	6899	8014	6376	13727	14266	10393	11172.5	12396	12379	14231.5	18689	18304	12352	12594	13538	12080	12634.5	15463	8967.5	11538	11620	6525	8219	8498	12056.5	15378
Delta-1-pyrroline-5-carboxylate synthase OS=Homo sapiens OX=9606 GN=ALDH18A1 PE=1 SV=2	6.71	88043.8	3805.96	P54886	36	48.55	0	P5CS_HUMAN	4407	4044		29185	29495.3	27151.3	31747.3	29013.3	29330	20581.3	19530	19209.7				2821	2693	2892		3573	3729	34016	34587.7	35744.3	28726.7	29606.7	30225.7	28435.7	28314.7	30904.3	12574.3	13379.7	13064.3	3418	3184.33	3315.33	3518.5	3256	3596.67	6200.67	6913.67
Adenylosuccinate synthetase isozyme 2 OS=Homo sapiens OX=9606 GN=ADSS2 PE=1 SV=3	6.14	50496.6	3796.47	P30520	23	46.71	0	PURA2_HUMAN	35754	30647	35245.7	44018.3	45335.7	49539.3	45939	44099.3	45410.3	46250.7	45802.7	48005.3	28799.3	27090.3	26590.3	14288	11969	12148.7	10771.3	10702	9946.67	40787.3	40097.7	39378.3	41039.7	41230	42453.7	42517.7	40380	26602.7	49135	44940.3	47650.7	34595.7	38323.7	38715.3	13784	15609.3	17208.3	10079.7	6665.33
Glucosamine 6-phosphate N-acetyltransferase OS=Homo sapiens OX=9606 GN=GNPNAT1 PE=1 SV=1	8	21091.3	3786.1	Q96EK6	5	39.67	0	GNA1_HUMAN	25167.5	18688.3	25677	9669	9969.67	10530	9200.33	10669.7	11536.7	12182.3	12728.3	14172	24065.3	15996.3	28495.7	27637.5	27982	31289.5	43706.5	46406.5	48330.5	14221.5	13194	23023	17811	13719.5	15759.5	18950	16072	25268	17760	17343	14205.5	32835	29250	16507	20777	18221	17912	11509	11769
26S proteasome non-ATPase regulatory subunit 10 OS=Homo sapiens OX=9606 GN=PSMD10 PE=1 SV=1	5.7	24713	3778.68	O75832	6	27.88	0	PSD10_HUMAN	7188	6540.67	6135.33	17991	17142.7	21105	16553.7	15310.3	18581.7	11367.7	10089	11683.3	7183.33	6108	6618	6861	4902.67	5942.33	8512	6918.67	7613	15118.3	15862.7	17728	16120	11374.3	11477.3	15046	13371.3	14342.7	11324.7	9724	10055	9519	8900.33	7827	7417	11478	11526	12789	14303
Keratin_ type I cuticular Ha2 OS=Homo sapiens OX=9606 GN=KRT32 PE=2 SV=3	4.59	51825.8	3777.32	Q14532	9	18.08	0	K1H2_HUMAN	28838	23068	27685	6523.3	6843.67	5929.31	11649.9	12122.9	15582	14652.3	17539	16875	37340	29229.9	32776	24171.7	23584.7	30081	23981	25566	23519.6	4996.5	4353.23	4375.21	3854.47	6072.25	4014.05	3994.5	3495.15	5268.1	8205.69	8664.48	8837.76	6355.45	8875.84	8759.77	17542	19248.1	18515.8	15206.1	19068
Ubiquilin-2 OS=Homo sapiens OX=9606 GN=UBQLN2 PE=1 SV=2	4.97	65696.3	3776.07	Q9UHD9	13	31.73	0	UBQL2_HUMAN	14583.2	17543	17359	16601.4	15689.7	19187.4	16126	14731.5	20207.9	18432.1	16874.8	21680.8	19831.7	19655.4	24054.7	19751.9	19571.7	26055.8	20687	20776.3	26690.7	18024.7	17636.3	17201.4	19635.1	17310.3	18316.6	17292.2	16723.4	16077.6	21841	21994.7	21256.1	24989.2	25022.8	23980.5	44044.7	43877.6	36535.7	39388.2	38517.5
S-adenosylmethionine synthase isoform type-2 OS=Homo sapiens OX=9606 GN=MAT2A PE=1 SV=1	6.05	44002.9	3769.33	P31153	22	44.3	0	METK2_HUMAN	32584.3	32543.3	32435.7	35555.3	35690.3	40779	34372.3	32557.3	36934.7	40636.3	38066.7	41520	33929	35743.3	30742.7	18297.7	17365	19223.7	17330.3	17631.3	18725.3	45075.3	45645.3	46167.7	42329.7	41569	43601.7	41764	43245.7	38294	51020	47638.3	47679	43848	42242.7	40860	17650	16334	14889.7	12261.3	11464.7
GMP synthase [glutamine-hydrolyzing] OS=Homo sapiens OX=9606 GN=GMPS PE=1 SV=1	6.45	77456.9	3762.73	P49915	35	58.01	0	GUAA_HUMAN	8370	7473.67	7177.33	26504.7	25780.3	27617	26234.3	26452.3	27947.7	18516.3	17047.7	18340.7	7122.67	6412.33	6188.33	10125.7	8643	7685.67	8843.33	9896.33	8724.33	28836.3	27588.7	28489.7	23451	23674.7	24120	22596	23850.7	23527.7	10161.7	10423.7	10379.3	5716.67	5763.33	6123.33	6390	7661.33	10444.3	6917.33	9542.67
Ras-related protein Rab-3B OS=Homo sapiens OX=9606 GN=RAB3B PE=1 SV=2	4.65	24986.1	3750.7	P20337	4	23.74	0	RAB3B_HUMAN						20286			6354			15935			7926.5											3469	1228			2595		2085		2096	2748	2813
Ras GTPase-activating protein-binding protein 1 OS=Homo sapiens OX=9606 GN=G3BP1 PE=1 SV=1	5.23	52221.4	3747.78	Q13283	16	51.5	0	G3BP1_HUMAN	7645	8539.33	7185.67	26593.7	28037.7	28451	21381	21971.3	22209.7	19657	18380.3	20535	6985.67	6041.67	7090	7949.33	7884.33	8256.33	9889	10143.3	10600.7	38425.3	36747	34540	39466.7	31110	36670.7	37195.7	32992.3	30153	21066	19356.7	17234.7	6980.33	6979	6398	6238	6232	7880	12700	7587.5
Alanine--tRNA ligase_ cytoplasmic OS=Homo sapiens OX=9606 GN=AARS PE=1 SV=2	5.19	107552	3742.01	P49588	36	44.42	0	SYAC_HUMAN	4225.33	3906.67	4010	30943	29170.3	29874.3	31586.7	30398.3	30338	13893.3	13237	13302	5233.33	5057.67	5668	2892	3096	3040		3571.33	4641.33	27385.7	28886.3	26570	26293	23735.3	25650.7	28035	27204	26297	8681.67	8765.67	9013.33	6134.67	6689	6112.33	6909	5337.67	5116	11132	10762
Polyadenylate-binding protein 4 OS=Homo sapiens OX=9606 GN=PABPC4 PE=1 SV=1	9.73	71125.2	3740.01	Q13310	23	31.68	0	PABP4_HUMAN	3068	3188	3703.5	16975.5	18080.1	19593.6	13309.8	14766.5	14065.2	8671.53	7980.15	7976.18	2696.11	2789.27	3086.63	4281	3497	2851.67	3603.74	3496.27	2863.83	13551.3	13956.5	14399.4	18264.4	19490.5	18604.1	16881.6	17618	17220	7672.95	7658.29	8027.79	4528.84	4970.35	4847.07	2396.83	1644.24	1058.69	6992	7597
Cold shock domain-containing protein E1 OS=Homo sapiens OX=9606 GN=CSDE1 PE=1 SV=2	5.85	89740.2	3728.13	O75534	31	37.72	0	CSDE1_HUMAN				11492.3	12355	12662.3	8147.67	7913.67	7330	2598.67	2626.67	3597.33	2703.5	3159	3105.67	4333	3788	4275		4001	4196	22183	22453	22648.7	23890.3	23182	23668.7	17383.3	18543.3	17389.7	5559.33	5278.67	5731.67	5634.67	5373.67	5598	4145.33	3733	3785.67	4279	3612.67
60S ribosomal protein L23a OS=Homo sapiens OX=9606 GN=RPL23A PE=1 SV=1	11.15	17695.1	3725.95	P62750	7	41.67	0	RL23A_HUMAN	17521	16702	15871	31591	31592.7	32161	33273.7	33506.7	32462.7	23084.3	23610.7	20454	16630.7	16579.7	14565.7	10088.7	9531	8781.67	19232.3	18924.3	18298	19680.7	20972	20618	27413.7	28922.7	29619.3	26177.7	25216.3	26197	27958	30089	31029	18978	20713.3	21054.3	12877.7	12937.7	12930.7	18996.3	19396.3
Phosphatidylinositol transfer protein beta isoform OS=Homo sapiens OX=9606 GN=PITPNB PE=1 SV=2	6.47	31825.3	3713.07	P48739	14	47.6	0	PIPNB_HUMAN	11645	11469.3	12237.3	17784.3	20351	25672.3	18296.3	19968.7	17190	23241	24859.3	29100.7	11436.7	12543.3	10261.3	10120.3	12127.7	11417.7	4292.67	4761.67	4951.67	29440	27535	27812.3	27521	26722.3	27851.7	28401.3	29598.3	28556.7	31883	31549.3	30659.3	17967.7	18219	18555.2	4732.67	6667.58	8619.33	6026	8011.33
Glutathione reductase_ mitochondrial OS=Homo sapiens OX=9606 GN=GSR PE=1 SV=2	8.56	56827.4	3703.48	P00390	16	40.04	0	GSHR_HUMAN	49954	45364	47422	26516.3	27812.3	23633.3	25805.3	27747.3	26185	33732.7	33995.3	35538.3	41785	40387	40994.7	59825	57381	50593.7	59030	66852.3	63348	31216.7	29646.3	29067	27481	28683.7	26726.7	29551.7	29638	27048	40810.3	39739.3	43005.7	49975	47559	48100.3	77145	73740	69911.3	74115	69745.3
Eukaryotic translation initiation factor 4H OS=Homo sapiens OX=9606 GN=EIF4H PE=1 SV=5	7.21	27442.1	3702.96	Q15056	15	50	0	IF4H_HUMAN	22474	20900.3	22974.3	34108	32665.7	39476.7	30901.3	32098	40210	29409	27339.3	32764.7	30381.3	30965.7	35587.7	26161.7	26871	27341.3	30363	30506.3	33247	43082.3	44515.7	44867	47711	48968	49297	47434.3	49502.7	48282	42644.7	43401	45016.3	39571.7	41444.7	40711.3	45380	44909.7	43474.3	55195.7	55237
Translin OS=Homo sapiens OX=9606 GN=TSN PE=1 SV=1	6.03	26297	3701.9	Q15631	8	38.6	0	TSN_HUMAN	17434.7	16558.3	15481.7	18599.7	18109.7	20315.3	17847	18381	20698.3	22872.3	21067.7	24220	27634	26784.7	29470.3	18231.3	23773.7	25563.3	16039.3	19654.3	17231.3	14686	15666.3	14804	16622.3	16453	16674.7	15741	15728.3	14131.3	18028.3	18253.3	17463.3	19979.7	19197	19465.7	19199.7	18988.7	17918	9180	8327
GTP-binding protein SAR1a OS=Homo sapiens OX=9606 GN=SAR1A PE=1 SV=1	6.27	22480.9	3698.93	Q9NR31	9	57.58	0	SAR1A_HUMAN				1485.91	2383.01	1800.2	2694.49	2928.94	5210.82													20420	21280.7	22354.2	13141	13995.2	13454.5	12029.1	12495	13255.2	6923.27	6715.35	6962.43	1539.6	1455.37	1419.65				5959.43	6692.31
RNA cytosine C(5)-methyltransferase NSUN2 OS=Homo sapiens OX=9606 GN=NSUN2 PE=1 SV=2	6.36	87269.3	3693.72	Q08J23	33	51.63	0	NSUN2_HUMAN	12013.7	11184	10826.7	19675	20052	23341	18047.7	18325.7	22410.3	19609	18576.7	21793.7	11500.7	10546.3	13405.3	3813	4442	4738.33	4268.33	4472.33	5852.67	32759.3	31639	30341	29052.3	29240	29983.7	28655.7	28205.3	27431	21333	21314	22923.3	11820	12490.7	12632.3	7241.67	7456	6481.67	12408.3	12918.3
Early endosome antigen 1 OS=Homo sapiens OX=9606 GN=EEA1 PE=1 SV=2	5.42	163435	3682.29	Q15075	89	55.85	0	EEA1_HUMAN	25635.7	24683	34381.7	19309.3	25847.3	17887.3	18041.3	22499.3	18000.3	25875.7	31221	23484	28857.7	32700.3	29295.7	31295.3	29889	33876	39544.7	39877.3	42147	12563.3	12285.3	11383	14274.7	15874.7	15861	16250.7	18428	16279.3	20115	20360	20932	30960.3	30257.3	31915.7	28764.7	27178.3	26978	30218.3	28551
SRA stem-loop-interacting RNA-binding protein_ mitochondrial OS=Homo sapiens OX=9606 GN=SLIRP PE=1 SV=1	10.99	12406.1	3660.96	Q9GZT3	3	31.19	0	SLIRP_HUMAN				2570	2451	2177					2688											4797	4184	4080	4787	4637	4499	3845.5	3600.5	2690	6050	6347	5762	3686	3426
Ras-related protein Rab-5B OS=Homo sapiens OX=9606 GN=RAB5B PE=1 SV=1	8.24	23935	3656.05	P61020	11	67.91	0	RAB5B_HUMAN	8232.25	7578.86	7022.42	6266.46	5750.95	5734.35	7553.7	7111.17	7204.18	9508.25	9991.16	9387.03	9494.88	9338.87	8407.93							5433.09	5862.39	5619.52	5145.06	4212.37	5138.7	5956.49	5612.43	5242.19	7369.86	7319.75	6169.91	4894.29	4882.01	4890.11
Ras-related protein Rab-5A OS=Homo sapiens OX=9606 GN=RAB5A PE=1 SV=2	8.25	23886.8	3656.05	P20339	11	65.58	0	RAB5A_HUMAN				5169.2	4706	6217.84	6123.81	5698.62	8018.29	5462.48	5698.3	8054.24	2299.65	2265.74	2493.6							4995.32	5069.27	6601.02	6874.71	6817.06	7021.89	7184.95	5394.93	7524.66	8674.28	6303.43	7964.11	7767.55	7697.12	7699.18				3378.49	2209.79
Peptidyl-prolyl cis-trans isomerase H OS=Homo sapiens OX=9606 GN=PPIH PE=1 SV=1	8.12	19493.3	3650.99	O43447	11	63.28	0	PPIH_HUMAN				9500.47	10105.7	9601.67	5089.29	3436.36	9938.67	3441.39	4212.33	5842.5	2468.82	2616.72	3956	141.44	150.742	2045.5	157.692	72.898	2185	8908	9148	8859.67	9051.67	10272	9462.67	9644.67	9762.67	10589	6976.33	6777.33	7397.33	3970.33	3641	3951					3034
Charged multivesicular body protein 4a OS=Homo sapiens OX=9606 GN=CHMP4A PE=1 SV=3	4.45	25098.3	3632.67	Q9BY43	9	44.59	0	CHM4A_HUMAN	35532	34763.3	35474.7	19794.3	19682	23387.7	20796	21926.3	23135.3	29106.3	29516.7	26821.7	35811	33705.3	35801	42192.7	40688.3	38578	46824.7	47429.7	51541	23672.7	22399.7	22031	23405.3	24255.7	24353.3	23148.3	22275	23330.3	28317.3	28900.7	28769.3	33379.3	33172	33363.3	43631.3	45996	42663.3	47930.7	47605
Cathepsin Z OS=Homo sapiens OX=9606 GN=CTSZ PE=1 SV=1	6.77	34552.3	3631.29	Q9UBR2	8	35.97	0	CATZ_HUMAN	19379.7	21509.7	15655.7	11196.3	12819.3	21237	10728.7	12248	19360.5	18407.7	15288.7	24957.5	14857	15398.3	21046	19335.3	18225	23884	14878.7	17817.7	22608.5	3537	3648	3015	4068	2743	5508.5	8890.5	8294.5	4382	9652	9488	8900	7144	7148	6671	6571	5949	6276	6728	7295.5
Platelet-activating factor acetylhydrolase IB subunit alpha OS=Homo sapiens OX=9606 GN=PAFAH1B1 PE=1 SV=2	7.04	47208.3	3623.67	P43034	18	46.1	0	LIS1_HUMAN	25643.3	23277	22900.7	25948.7	23852.7	26746.3	23492	22082	27015	19821.3	18841.3	23433.3	26914.3	27300.3	31081.7	19179.3	19262	20200	15675.3	16464.3	14952	28369.7	28927.7	28635	27781.7	29432	28973.7	28573	28741	28373.7	27295	28343	26764	31817.7	33192.3	33665	30473	27851.3	27815	10691.7	10662.7
DNA damage-binding protein 1 OS=Homo sapiens OX=9606 GN=DDB1 PE=1 SV=1	4.98	128223	3620.16	Q16531	48	40.7	0	DDB1_HUMAN	41792.3	42018.7	42022.7	29011	27121.3	26325	31568.3	31733.7	29618.3	44682.7	41802.3	40574	54411.3	54973.7	54641.3	44351	42214.3	42694.3	19079	19416	20691	29356.7	27178.3	27056.3	26719.7	28045.3	27385.3	30246	29303.3	28054.3	42417	39068.7	40744.7	57413.7	42522	42799	47101.7	46068	43943	17335.3	16655.7
Keratin_ type I cuticular Ha5 OS=Homo sapiens OX=9606 GN=KRT35 PE=2 SV=5	4.65	51672.4	3608.42	Q92764	10	19.78	0	KRT35_HUMAN				2299.84	1876.82	2090.54	918.412	1487.17	1496.95	707.055		2253
Na(+)/H(+) exchange regulatory cofactor NHE-RF1 OS=Homo sapiens OX=9606 GN=SLC9A3R1 PE=1 SV=4	5.45	39153.6	3594.74	O14745	15	45.53	0	NHRF1_HUMAN	21398.3	18548.3	19417	16681.3	15947.7	14284	14891.3	15245.7	12139.7	18105.7	18292.3	16062	19269.7	19919.3	19443.3	18465.7	18360	19373	22394.7	20963.3	22587	10928	11315.7	11359	13502.7	13977.3	13692	12752.7	12760	13561.7	18529.3	18463	19322.3	22503.3	21875.7	21958	29388.7	29112.3	28063.7	29487.7	30847.7
Ras-related protein Rab-3A OS=Homo sapiens OX=9606 GN=RAB3A PE=1 SV=1	4.66	25212.1	3588.25	P20336	5	33.18	0	RAB3A_HUMAN				156.629	949.178	2668.67	1060.28	2157	5113	495.908	413.4	4858	17003	15367	10651.7	4353	3223	9355.5	4012.5	3409	11796	1489.33	326.291	1424	2026.21	2381	2244.21	2463.73	2317.32	2545.28	3829.28	3636.28	3138.77	2562.26	2661.93	3707	4910	6442		6719.5	7087
Glutamine--tRNA ligase OS=Homo sapiens OX=9606 GN=QARS PE=1 SV=1	6.76	88711.3	3586.22	P47897	32	45.55	0	SYQ_HUMAN				16405	16260.3	15731	8192.67	7596.33	7766	3536	2992.5	3664.33		2218	2362.5			2135				22835.3	22856.3	22557.7	18772.3	18534.7	18287	11379.7	11922.7	10797	2887.33	3119	2690	2584.33	2767.67	2402.26				3628.33	3452
60S ribosomal protein L28 OS=Homo sapiens OX=9606 GN=RPL28 PE=1 SV=3	12.5	15804.6	3586.06	P46779	8	45.26	0	RL28_HUMAN	5697	5494	4549	10367.7	10055.3	9557.33	7143.67	6935.33	8380	7564.67	6782	9354.33	6594	7143	9718.5	3424	3457	4960.33	6511	7022.67	7840	7596.67	6921.33	7541.33	9378.67	10430.7	10630.7	10198.3	9400.33	9425.33	10500.3	10110.3	10658.7	11184.3	11085	10606.7	4038	3960	3844	9654.67	9472.67
Ras-related protein Rab-3D OS=Homo sapiens OX=9606 GN=RAB3D PE=1 SV=1	4.57	24495.3	3585.03	O95716	3	15.07	0	RAB3D_HUMAN	53790	53769	53913	14878.7	14420.8	8112.92	15527.2	28496	13546	18531	20452.8	9132.04	46095	45912	12567.4	46931	51247	20919	47088	53408	19554	12906	8186.85	11605	8153.29	12208	8279.19	9567.27	9385.18	8005.22	11429.2	9485.22	8621.73	13171.1	10108.6	19259	31806	29605	29149	23303	21940
ATP-dependent 6-phosphofructokinase_ liver type OS=Homo sapiens OX=9606 GN=PFKL PE=1 SV=6	7.25	85817	3577.58	P17858	32	43.21	0	PFKAL_HUMAN	19776	23467.6	21717	22029.3	22142.3	20972	22703.3	22647.7	20543.7	28062	25258.3	24111	25533	24163.3	21922.3	17820.3	18097	18415.3	9539.33	11308.3	13344.7	21455.9	20365.4	19288.6	17964.7	15807.6	16467.4	17289.9	16307.2	15921.7	19575.9	18678.6	18847	18565.6	18827.9	18277.8	15574.3	15451.3	14945.3	8112.67	8585.33
Myosin-14 OS=Homo sapiens OX=9606 GN=MYH14 PE=1 SV=2	5.36	228840	3577.49	Q7Z406	43	23.61	0	MYH14_HUMAN	10883.5	7669.67	9501.27	18145.8	17199.6	22546.1	19525.7	17465.1	24282.1	8661.53	8226.35	12616.4	8376.67	7655.67	12034.7	11011	10921.3	15499.7	8823	13106.7	18833.7	19111.5	18111.9	18455	25886.7	26656.7	25133	26788.3	27094	26819.7	13095	12400.3	12312.7	15068	14674.7	16428	19998.5	22021.1	19188.3	17564.3	18289.7
Cell division control protein 42 homolog OS=Homo sapiens OX=9606 GN=CDC42 PE=1 SV=2	6.18	21600.8	3570.54	P60953	3	19.9	0	CDC42_HUMAN				5871.5	6628.67	5268.67	6021	7222.5	6029	4777	9727.5	8132.5		3339	5669								2021		7558	6032	8062		3029
Hemoglobin subunit beta OS=Homo sapiens OX=9606 GN=HBB PE=1 SV=2	6.91	16112.5	3565.78	P68871	5	44.9	0	HBB_HUMAN										7969		5890										1818.67	2053.67	1793	6029.67	3464.1	6150.92	9236.44	8676.95	9017.38	4109	2565.55	620.561	5900	4285.5	3881	3394			5219.2	4635.46
60S ribosomal protein L26 OS=Homo sapiens OX=9606 GN=RPL26 PE=1 SV=1	11.23	17258.2	3550.97	P61254	7	37.93	0	RL26_HUMAN	20160.3	20049.7	17721	20923.3	18691.7	16263.3	20203.3	19003.7	16604.3	19129	20168	20131.7	23680.7	22142.3	25498.3	27132.7	27148.3	26629.7	26741	29150	31210.7	7780	11208.3	11993.7	13406.3	14642.3	14289.7	11578.3	11715.3	11988.7	8653.33	8943.67	6603.92	6449.33	6670	6646.33	4326.84	4469.65	4703.79	8036.5	6037.86
26S proteasome non-ATPase regulatory subunit 1 OS=Homo sapiens OX=9606 GN=PSMD1 PE=1 SV=2	5.09	106863	3541.21	Q99460	38	42.81	0	PSMD1_HUMAN	7996	8540.33	9040.33	27128.7	25094	26384	26813	23694.3	24307.7	16457.3	15694.3	16469.3	9301.33	8891.67	9287	10847.7	8953.33	10090.7	12311	11795.7	12135.7	24667.7	25153.7	25437.7	22131.7	25813.3	22926.3	21966	22596.3	22719.7	15137	15210	14720.3	11135.7	10934	10981.7	12030.7	11540.7	11181.7	13532.3	13517.7
Sulfotransferase 1A2 OS=Homo sapiens OX=9606 GN=SULT1A2 PE=1 SV=2	8.13	34423.9	3538.12	P50226	11	39.32	0	ST1A2_HUMAN	1740	1806.67	1775	4419.5	4350.76	2682.38	4042.86	3908.12	3197.88				930.675	889.742	1292.36					1964.5	3359.5	1646.14	1821.08	1845.37	1140.15	1530.86	1533.67	1294.89	1330.28	1394.71	2668.55	2787.85	2221.25				3664	3883.33	3501	4569.33	4468.33
CXXC motif containing zinc binding protein OS=Homo sapiens OX=9606 GN=CZIB PE=1 SV=1	4.73	18390.6	3534.7	Q9NWV4	4	35	0	CZIB_HUMAN	5173.5	8174	8364.5	12146.3	11155.7	13630	15282.3	15789.7	16631.3	13682.7	15261.3	18033.7	12392	11950.7	14762	6032	6743.5	7088.67	11141	11855	10513.3	15049.7	14427.3	11095.7	15603.7	14371.3	14521.7	16437.7	16443.3	16575.7	19564.7	19171	19806.3	14658.3	14096	13938	13896	14872.5	13998.5	25497	27785
Actin-related protein 3 OS=Homo sapiens OX=9606 GN=ACTR3 PE=1 SV=3	5.53	47827.5	3528.75	P61158	15	39.23	0	ARP3_HUMAN	34678.3	39843	36733.3	27822	30095.7	31002.7	29459.3	30378	31735.3	38046.3	35213.3	38262	39921.3	39432.7	42236.7	18725	16948.3	18053	7672.67	8197	8335.33	33910.7	35503.7	37120.7	34367.7	34865.7	36564.7	36241	34781.7	37781.3	40848.7	42860	42369.7	37631	38820.3	37687.3	24049.7	23730.7	23801.7	8541.67	8576
Ubiquitin carboxyl-terminal hydrolase 14 OS=Homo sapiens OX=9606 GN=USP14 PE=1 SV=3	5.02	56525.4	3521.07	P54578	16	36.84	0	UBP14_HUMAN	4979.33	5104.5	4516.33	18901.7	19567	20702.7	16848.7	16468	19208.3	13691	15418	16220	4009.33	3717.33	5649	3812	3596.33	5568	4185.33	3811.33	5826	21725.7	22707.7	23279.7	20877.7	22225.3	20692.3	19995	21737.7	21333.7	12144.7	11575.7	12751.3	6848	6970	6517.67	7358	7298.67	6868.33	7226.33	6978.67
Glutathione synthetase OS=Homo sapiens OX=9606 GN=GSS PE=1 SV=1	5.58	52556	3515.42	P48637	20	47.05	0	GSHB_HUMAN	30934	29184.7	29265	16822.7	16640.3	15602	16503	15521.3	12431	19624.3	18253	17331	22108	21293.3	18283.3	25132	22390.3	19340	10257.3	11079	8869.33	16434.3	15550.7	15454.3	15654	15773.7	15675.3	16726.3	17155.3	16696	16113.3	15714.3	15661	17972	17049	17152	22633.3	22539.3	19360.7	7750.67	7558.33
Peptidyl-prolyl cis-trans isomerase FKBP10 OS=Homo sapiens OX=9606 GN=FKBP10 PE=1 SV=1	5.25	64758.4	3511.73	Q96AY3	17	31.27	0	FKB10_HUMAN	29917.3	30302.3	29098	27075.3	25559	24945	25340	23232.7	21054.3	29871.7	26673.3	28623	27898	26033.7	22469.7	39566.3	34155.7	40589	44469	40529	44698.3	22162	22003.3	22509.7	19701.3	17203.7	18536.7	19708.7	19506.7	19540.7	23735.3	23944	25336.3	26172.3	26862.7	25446	46927	46880.3	40316.3	56274.3	54065.3
Vacuolar protein sorting-associated protein 29 OS=Homo sapiens OX=9606 GN=VPS29 PE=1 SV=1	6.36	20676.8	3502.44	Q9UBQ0	9	57.14	0	VPS29_HUMAN	11140.7	10668.3	10561	11422	11185.7	10222.3	12857.3	12800.7	10672	16143.3	14328	14783	13291	13952	12449.7	3804.5	6159	5624.5	3278.5	2940	3586.5	10684.3	10103	10101.7	10114.7	10412	9501.67	10613	10853.7	10823.7	14959.3	13834.7	13942.7	12625	10865	10636.3	6372.67	6216.33	6127.67		2734
Importin-4 OS=Homo sapiens OX=9606 GN=IPO4 PE=1 SV=2	4.7	120255	3500.18	Q8TEX9	28	37	0	IPO4_HUMAN	5265.33	6042	7979	9838.67	9908.33	11255	9047.67	9402	8435.33	7242.67	7160.33	6921.67	7538.67	7551.67	9381			5661			6920.33	12079.3	12072.3	12646.3	10532.7	11293.3	10154	9250.67	9580	10184.3	7550	7963.33	7561.33	8145	9151	8998.33	9242.33	8853	9205	10667	10679
Annexin A11 OS=Homo sapiens OX=9606 GN=ANXA11 PE=1 SV=1	7.62	54732	3500.1	P50995	15	29.7	0	ANX11_HUMAN	66593	33212	60766	34663.3	30172.3	39444.3	36224.3	34512	40912.7	31788.7	25555.7	32308	33555.5	30587.5	26357	68393	50360	23900.7	68891	73490	40025	35527.3	34085.7	34401	44002.7	43611.7	41623.3	44702.3	43532	45090.7	44424	43008.7	42939	38685.3	38208.7	35914.3	59969.5	60069.5	58561.5	29115	31750
Thioredoxin domain-containing protein 5 OS=Homo sapiens OX=9606 GN=TXNDC5 PE=1 SV=2	5.59	48313.2	3487.19	Q8NBS9	16	33.8	0	TXND5_HUMAN	50260.7	48015.7	45444.3	45649.3	42883.7	47795.7	40809.3	40959.3	48458	52273.7	53979.3	59339.3	56155.3	56519	64109.3	55813.7	55356	49310.3	49463.3	51454.3	49968	34555	34715.3	34134.7	37802	34983.3	35480	36118.3	36785.3	37129.3	48001.7	46355	46242	48502.3	48712.3	49071.7	52209	46141.7	45715.7	54278.3	48768.7
60S ribosomal protein L29 OS=Homo sapiens OX=9606 GN=RPL29 PE=1 SV=2	12.21	17809.1	3482.71	P47914	2	15.09	0	RL29_HUMAN	9083	13297	13952	4557	2184	4865.33	1920		6687		3203	7108	2597	6710.5	8887	19297.5	17128	13574	10213	10380	11809	7380	5260.5	5168	5403	5734.5	7974	4971	5799.5	6643	6841	11763	11574	15461	14252	14044	22037	20390	18320	15691	7504.5
26S proteasome non-ATPase regulatory subunit 4 OS=Homo sapiens OX=9606 GN=PSMD4 PE=1 SV=1	4.49	40964.9	3477.56	P55036	11	31.3	0	PSMD4_HUMAN	19678.3	18722.3	19035.3	27661	27531	27823	23645	23204.3	21942	18140.3	17901.3	17006	14310.7	14389.3	13395	13968.7	14097	13149.7	17998.7	17121.7	15792	21501	21728.3	21172.7	18381.3	17467.7	18138.3	18388.3	19050	17865.7	15396.3	14736.3	15485.3	13720	13477.7	13661.7	17032.3	16522	15204.3	18839.7	17286.3
Peptidyl-prolyl cis-trans isomerase-like 1 OS=Homo sapiens OX=9606 GN=PPIL1 PE=1 SV=1	8.19	18350.9	3463.85	Q9Y3C6	6	37.95	0	PPIL1_HUMAN	13378.7	12549	12060	24172.3	21984.3	24174.3	18793.7	17059.7	17797.7	15128	15192.7	14498	12326.3	11159.3	11108.7	11253.3	16173	11035.7	10914.7	11783	10224	26701.7	27224	26676	26774.3	25496.7	27395.7	24687.7	25625.3	24332	14249	13589	13959.3	12599.7	11882	11602	12443.7	11802.3	10592.3	9287	8730.67
Eukaryotic peptide chain release factor GTP-binding subunit ERF3A OS=Homo sapiens OX=9606 GN=GSPT1 PE=1 SV=1	5.32	56383.3	3460.28	P15170	21	47.49	0	ERF3A_HUMAN	4269.81	4033.69	4185.22	17183.1	17657	18411.4	15622.9	17327.6	15700.1	17540.1	20089.5	20856	6595	7570	7822	1888.92	2491.44	3049	2748.76	3032.62	2968.67	21308	21263.1	21003.2	22498.1	14762.5	19226.2	22333.6	21991.8	20176	20058.1	19274.8	17251.3	11652.5	10770.3	10635.9	8431.92	8104.56	7270.12	9244.02	8874.17
60S ribosomal protein L23 OS=Homo sapiens OX=9606 GN=RPL23 PE=1 SV=1	11.19	14979.5	3457.09	P62829	4	29.29	0	RL23_HUMAN	22739	23921.7	22533.3	31041	29411.3	33354.3	20952	19199.7	21396.3	27048.7	27142.3	25619.7	4977.67	4449	5774.67	19077.7	18160.7	13788.3	20268	21025.3	21661.3	31829.3	31567.3	30674.7	36421	38713.3	36980.3	36819	37271.3	38292	32742.3	33048.7	32811.3	29078.7	29524.7	29075	23618.3	23947.3	24492.3	25075.3	25277.3
High mobility group protein B3 OS=Homo sapiens OX=9606 GN=HMGB3 PE=1 SV=4	8.73	23151.1	3449.39	O15347	10	35.5	0	HMGB3_HUMAN	19240.7	16870	16605	17066.3	15645	18482.7	17238.3	16362.3	19026.3	18832.7	17715.3	22129.7	23491	23016	26312.3	23700	21530.7	23413.3	28215.3	29217	32707.7	27053.7	26589.7	26902	25785.3	24625	26002.3	30535.7	29507	30200.3	26686	26495.7	26843.7	27688	28803	26826.3	33972.7	31917	28938.3	35991.3	33732.3
Interleukin enhancer-binding factor 2 OS=Homo sapiens OX=9606 GN=ILF2 PE=1 SV=2	5.01	43290.3	3448.97	Q12905	12	40.26	0	ILF2_HUMAN	21641.7	24895	22214.7	37270.3	34257.7	35496.3	32504.3	31262.3	32824	34393	28815	30647.3	30906	27397	27325.3	12275.7	11472	17837	10376.7	8691	14814	38499	40522.3	40126.3	41591	36861.7	41417.7	38312.3	36293.3	36536.3	41655.7	42089.3	39150	33118.7	33019.7	30371.3	16227.3	15962.7	16058.3	16699	16355.3
ATP-dependent RNA helicase DDX3Y OS=Homo sapiens OX=9606 GN=DDX3Y PE=1 SV=2	7.33	73610	3440.01	O15523	21	34.7	0	DDX3Y_HUMAN	15617.2	14709.5	22482.2	5989.67	5763.64	6929.39				9091.47	8678.13	10828.8	22577	22822.7	26077.9	7453.89	6457.05	9476.74	4171.99	3809.22	6004.82							3508.75	3580.71	3599.99	8053.45	8218.42	8143.01	8460.62	8888.48	8341.84	13510.3	13534.7	10831	5736.28	5789.31
Phosphoserine phosphatase OS=Homo sapiens OX=9606 GN=PSPH PE=1 SV=2	5.39	25178.8	3433.98	P78330	10	41.78	0	SERB_HUMAN	18212	16490.3	18360.3	31378.7	34669.7	36195.3	30018.7	31005	32559	30719.3	30188	30014.3	16533	15328	13402.3	18180.3	18750.3	16087.3	16245.7	17356.7	14853.7	11194.3	11756.3	15416	18852.7	11422	10809.3	20094	11059	14091	24118	15984.3	16058.7	21253.3	16024	16374.3	22958.7	22058	21741.3	13411.3	15015.3
Glycine--tRNA ligase OS=Homo sapiens OX=9606 GN=GARS1 PE=1 SV=3	6.65	83907.1	3430.32	P41250	35	44.79	0	GARS_HUMAN	41391.7	41636.3	42143.3	29971.7	30255	30000.7	31648.3	31497	31211.3	38224.3	38618	38032	42641.7	42845	43299.3	37417.3	33782.7	33373.3	17088.3	17786	16500.7	33697.3	32255.3	33365.7	29520	30723.3	30601	29707.3	30243	30373.7	37580.7	38925.3	40625.3	41414.7	42000	42355.3	46935	46793.3	45451	11645	11070.7
Clathrin heavy chain 2 OS=Homo sapiens OX=9606 GN=CLTCL1 PE=1 SV=2	5.49	189140	3429.95	P53675	31	19.57	0	CLH2_HUMAN	18173.7	38666	115803	12944.6	33555.3	16272.7	13612.6	45390.3	34093.3	43381.7	50776.7	36629.7	35914	35392.3	29648.7	88698	38670.7	41052.3	7976.73	38494.3	32534.7	14562.7	14091.3	10194.3	11915.7	14020.7	17236.3	16132.3	8123.5	14728.3	13214.3	17375.7	12170.7	13337.7	16032.3	13499.3	14860	17892	23594	20411.7	24259
Succinate--CoA ligase [GDP-forming] subunit beta_ mitochondrial OS=Homo sapiens OX=9606 GN=SUCLG2 PE=1 SV=2	6.07	46852.9	3420.23	Q96I99	23	50.93	0	SUCB2_HUMAN				15313.7	13914.3	18069.3	14638.3	13191	17072.7	7133.67	6571	9107										12476.3	12713.3	10782.3	12719.7	12226.7	12445.7	12110	12056	12605.7	2940.33	3135	3056.67
Dynein light chain roadblock-type 1 OS=Homo sapiens OX=9606 GN=DYNLRB1 PE=1 SV=3	7.57	10921.6	3416.28	Q9NP97	4	59.38	0	DLRB1_HUMAN	30921	35879	30141	5737	4737.5	8208.33	9169.5	6158.67	6979.33	9977.67	8658	9304.67	17202	16009	11180.7	33682	13439	14891.3	38147	15803.7	24029.5	9530.5	8904.5	8314.5	7607.33	10381.5	7371	7593	10276	9854.5	28374	28065	28199	36678	35840	32899	12859	12872	8646.5	7010	7035
Ras-related protein Rab-4B OS=Homo sapiens OX=9606 GN=RAB4B PE=1 SV=1	5.72	23871.9	3415.49	P61018	6	24.88	0	RAB4B_HUMAN	4521.89	6798	7732	6072	5234	5770.33	4575.5	4871.5	8376	5257.5	7653	5866.67	7335	8173	6183	7746	5532.5	6347	10349	10390	11285	6238	5538	5602	1230	9430	4887.5	7461	5167.5	7455	1957.5	2057	2216	1982	2109	4030	2519		2577	2650
Ubiquitin carboxyl-terminal hydrolase isozyme L3 OS=Homo sapiens OX=9606 GN=UCHL3 PE=1 SV=1	4.66	26353.7	3408.39	P15374	8	40.43	0	UCHL3_HUMAN	5068.33	5729.33	4852.33	12053	11620.7	13059.7	11546.3	10791.7	13473.7	11752	12295.7	15417	6490	6601	8610.33	6756.67	5840.33	9237.67	6708.67	6611	10020.7	11532.3	11029.3	10571.7	12355.3	10622.3	11717.3	13703.7	12791.3	12181.3	13463	13201.3	12004	7847	8615.33	8751	9302	8826	8260.33	9547.67	9328.67
Fructose-bisphosphate aldolase C OS=Homo sapiens OX=9606 GN=ALDOC PE=1 SV=2	6.47	39855.1	3403.82	P09972	13	33.79	0	ALDOC_HUMAN	4287.1	5803.29	5385.49	5250.87	5249.07	5843.33	4651.67	5010	5855.33	5271.97	4845.95	6174.67	4334.85	4994.33	5504.33	5231.7	5059.9	4899.18	3472.81	3226.81	4157.07	3422.67	3189.04	3640.67	4178.67	3460.67	3568	5779.33	5333.33	4893	3704.33	3503.09	4014.67	4373.17	5108.34	5108	4734	3745.69	4001.9
L-lactate dehydrogenase A-like 6B OS=Homo sapiens OX=9606 GN=LDHAL6B PE=1 SV=3	8.83	42399.2	3401.58	Q9BYZ2	2	3.15	0	LDH6B_HUMAN				2439	1947.04	2940	1848	684.512	1445.43													2475.29	2474.3	2477.74	2480.66	2459.8	2548.59	2447.54	2336.03	2537.71	1637.42	2449	446.341
Sorting nexin-2 OS=Homo sapiens OX=9606 GN=SNX2 PE=1 SV=2	4.85	58585.3	3401.19	O60749	26	53.95	0	SNX2_HUMAN	3223.37	3178.23	2676.36	28505.3	27368.1	29684.3	25681.4	26654.7	28149.7	20675	19096	20622.4	3954.37	3588.73	4844.67	1934.58	2764	2955.67	2326.69	1832.38	2993.19	16459.7	17253.7	16643.3	23659	20495.7	22716.3	22226	21411	18226.3	7559.33	7253.67	7535.67	5502.67	5157	5249.67	4171.67	4410.33	4302.33	4825.33	5341.33
Apoptosis-inducing factor 1_ mitochondrial OS=Homo sapiens OX=9606 GN=AIFM1 PE=1 SV=1	9.39	67185.8	3389.23	O95831	15	27.41	0	AIFM1_HUMAN	21076.3	18893.3	19721.3	4477.67	4734.67	5539.67	3958.67	3415.67	6487.33	7024.67	6528	8520.33	20348.7	19505	22310.7	13668.7	13031.3	13679.7	3727.33	5246.67	6437.67	8121.67	7419	8177.33	9502.67	8388	9153	10576.7	11011.3	9884	20173.7	19407	20752.7	32616.3	33184.3	33167.3	25416	24261	25086.3	8579	9222
Ras-related protein Rab-6A OS=Homo sapiens OX=9606 GN=RAB6A PE=1 SV=3	5.23	23706.9	3370.61	P20340	9	34.13	0	RAB6A_HUMAN	13813.4	13051.4	11350.9	14229	13807.3	18774.3	14639.7	18578	18356	18901.4	17243.3	20396.3	12222.3	19771	13103	11092	10029	7612.33	11024.5	7471.67	11822	12418.7	11945.7	12233	15059.3	14656	15744.3	16096.7	16748.3	16696	19763	20619.3	21156.7	28328.3	28010.7	26771.7	26505	27499	31369	29223.3	27797.7
CAD protein OS=Homo sapiens OX=9606 GN=CAD PE=1 SV=3	6.03	245322	3368.12	P27708	70	41.48	0	PYR1_HUMAN	47216	47869	25566	24316.7	26691.7	23615.7	22719	23965.7	18140	25135.3	22166.3	11316.7	16908	17289	9154.67	32212	29501.3	15608.3	8996	8520.33	4882.33	27312.3	27420.3	28121.3	22901	25023.3	22742.3	21130.3	21888	19971.3	12299.3	10700.7	8580	8773.67	11231.7	8302.33	3977.33	4128.33	4298.67	3947.21	3786.47
Ran GTPase-activating protein 1 OS=Homo sapiens OX=9606 GN=RANGAP1 PE=1 SV=1	4.43	63998.3	3365.39	P46060	23	44.63	0	RAGP1_HUMAN	9235	9158.67	9093.67	15632.7	16076.7	17395.3	12258.7	12533	14281	11518.3	11802.3	12952.3	8149	7700.33	9261.33	7601.67	8989.5	8540.67	6090.67	5780.67	6201	33615	33125.7	33835	30666.7	30649.7	30644	28136	29357.3	28264.7	19649.7	19143.7	19524.3	14904.3	16480	16472	10608.7	12618.7	10289	13224.3	12150.3
Aflatoxin B1 aldehyde reductase member 2 OS=Homo sapiens OX=9606 GN=AKR7A2 PE=1 SV=3	6.78	40045.3	3364.88	O43488	9	28.97	0	ARK72_HUMAN	4914	4401.5	4081	18059.3	18115	18690.7	18061.3	18809.7	18844	18029	17692.7	17315.7	5921	5358.67	6646	6465	5008	6403	4161		3402	18906.7	18888.3	18451.7	14864	14518.3	15282.3	16882.3	19625.3	16686.7	14297.3	14491	13593.3	5685.33	5592.33	5131.67	4409	4178		2663
Nucleolar RNA helicase 2 OS=Homo sapiens OX=9606 GN=DDX21 PE=1 SV=5	9.9	87857.8	3357.98	Q9NR30	30	40.49	0	DDX21_HUMAN				15739.7	14863.7	16619.3	13181.7	13081.7	12577.7	2472	2341	2199.5	2391.5	2534	4791	3494	3672.5	6246	5364	12165	3152	18457.3	18992	18366.3	19754.3	22467.7	21394.7	16964.3	16930.7	18339.3	3204.67	5336.67	5783.33	5668.33	5919.67	3050			9580	9735.67	8460.33
Splicing factor_ proline- and glutamine-rich OS=Homo sapiens OX=9606 GN=SFPQ PE=1 SV=2	9.95	76263.6	3340.14	P23246	27	33.66	0	SFPQ_HUMAN	12469.7	11486	11409	33762.3	31469.7	38807.3	33421.3	29720.7	39302.7	19372	18451.7	25606.7	13974.5	13205	20142.4	8199	8633	8614.33	12111.3	12324.3	11380	38764.7	38595	39390.3	47842.3	47524.3	46390.7	48289.3	47772.3	46964.7	22725.3	23094.7	22791	17862.7	17451.3	16733.7	14395.7	8344.87	13795.7	18435	18069.7
Thioredoxin-like protein 4A OS=Homo sapiens OX=9606 GN=TXNL4A PE=1 SV=1	5.45	16900.5	3336.07	P83876	5	35.92	0	TXN4A_HUMAN	15911.5	11064.3	9904	9972	8511	8772	10968.3	9873.33	5831	14045.7	13813.7	13049.3	11326.7	11004.3	9672.67	22588	19601	10228	5073	15772	9762	9680	9475.33	9353	11729.7	7674.33	10471	13069	12486.7	11300.7	14729.7	14488.7	12316.3	10748	8016.33	9805.67	12140.5	11060	9162.5	4263	5933
40S ribosomal protein S11 OS=Homo sapiens OX=9606 GN=RPS11 PE=1 SV=3	10.95	18601.8	3327.73	P62280	9	32.91	0	RS11_HUMAN	5469.33	5411	4663.33	10798	11213	12755.3	9506.67	9790	12036.7	7439.33	7064	9324.33	6400.33	7174.5	8707.33	3976.5	4318.5	5304.67	9803.33	9608	11635.7	10605	10787.3	11135.7	11875	12287	12646.7	10114.7	10185.7	10886	11260.7	11120	11226	9593.33	9848.67	9626.33	4345.5	4433.5	4367	15244.7	14781.3
Creatine kinase U-type_ mitochondrial OS=Homo sapiens OX=9606 GN=CKMT1A PE=1 SV=1	8.37	47436	3327.16	P12532	16	39.09	0	KCRU_HUMAN	35365	31644	33587.3	16740.7	17772.7	13842.3	17639	19385.7	15384.3	26821	28018	25607.3	35516.7	37147.3	31751	43809	43089.7	36463.7	43352.3	44959	41250.7	11622.7	11297.7	10971.3	12891.7	10189.7	11174.7	12138.3	11942	10851	20494.3	18318	21908.3	23977.3	25123	24498.7	41024	40951.3	41957.3	35812	35919.3
Ras-related protein Rab-43 OS=Homo sapiens OX=9606 GN=RAB43 PE=1 SV=1	5.31	23567.5	3324.5	Q86YS6	4	22.64	0	RAB43_HUMAN	14206	13130	12013	5141	6187	4221	9518.5	6276.67	4224.67	9198.5	6404	5419	17581	16290	11515.5	7805	21597	7233.5	12287	11790	7459.5	4146	4979	4858	3344	3760.5	3890	3797	4210.5	3583	5285	5334	3774.67	7779	6818.5	8269.5	12048	7259	7198.5	11287	10085.5
Ras-related protein Rab-12 OS=Homo sapiens OX=9606 GN=RAB12 PE=1 SV=3	8.51	27590.6	3324.5	Q6IQ22	4	14.75	0	RAB12_HUMAN				4140	2811.67	4939	4179	4647	2872			1492										5016.67	3238.67	4617	5031.33	4303.67	3654.67	4129.5	4660.33	4386.5	2341.67	2530	3252
Ras-related protein Rab-30 OS=Homo sapiens OX=9606 GN=RAB30 PE=1 SV=2	4.71	23400.4	3324.5	Q15771	4	28.08	0	RAB30_HUMAN				21046	7280.33	2974	10826.5	10522	4011	10651	7923.5	4958
Ras-related protein Rab-39B OS=Homo sapiens OX=9606 GN=RAB39B PE=1 SV=1	7.85	24850.3	3324.5	Q96DA2	6	25.35	0	RB39B_HUMAN	11890	9012.67	10155	20139.7	24786	35688	25260	28041.3	42438	15998	15057.3	25223	12836	13251	17688.7	7792.33	7548.67	8981.33	7978	9556.33	9159.67	15449	16684	16108.7	17136	20131	15947	19684	15674	19156	9131.33	8030	8637.33	7455	7112	7516.5	8995.33	9698	9313.33	8198.33	8875.67
Ras-related protein Rab-37 OS=Homo sapiens OX=9606 GN=RAB37 PE=1 SV=3	5.96	25043.4	3324.5	Q96AX2	4	22.42	0	RAB37_HUMAN	12694.5	12932	12430	2158	1908	2477	3652	2730	3262	4021	3387	6231.33	5524	6001	5937	12330	11522	9242.67	12185.5	8602.67	8695.67	2099		1700	2748	2594.5	2612	2863.5	2943.5	3780	10463.7	10183.3	8116.67	18759	12872.7	13312.7	18648.3	17889.7	20947	13930.7	12952
Small glutamine-rich tetratricopeptide repeat-containing protein alpha OS=Homo sapiens OX=9606 GN=SGTA PE=1 SV=1	4.59	34291.3	3320.75	O43765	7	23.32	0	SGTA_HUMAN	16281.3	14453.3	15933.3	31810	33687	37628.7	42184	43777	46579	26718	28669.3	29388	13347.3	14626	14458.7	14219	12461.3	13257	16154.3	15665.7	16150.3	40091.7	37495	38270.7	38949.7	36570	37225.7	37062.3	34930.3	37468	24324.7	24197.7	24230	16073.7	15966.7	15889	22297	20718.3	18722.7	26847.3	25590.3
Arginase-2_ mitochondrial OS=Homo sapiens OX=9606 GN=ARG2 PE=1 SV=1	6.03	38863.1	3318.47	P78540	10	35.59	0	ARGI2_HUMAN	5023	5044	6018	1695.67	1880.5	7028	2031.5	1964	7410	3160.33	2820	9504.67	5190.67	4744.67	10296	4167.5	3485	9192.33			13822.5	2557.67	3369.33	3418	4195.33	4418.33	4246.67	3994.33	3936.67	4132.33	5739.33	5617	6313.67	6809.33	6523.33	6962	4934.33	4863	5918.5	12986	12321
Eukaryotic translation initiation factor 3 subunit H OS=Homo sapiens OX=9606 GN=EIF3H PE=1 SV=1	6.12	40101.5	3281.85	O15372	16	59.09	0	EIF3H_HUMAN	7850.67	8021	6325.33	25664	22693	17972.3	17443	16045.7	13029.7	9482.33	8900	7877.67	7694	7657.33	6805.67	6418.67	5982	6494	7102.67	6849	7246.33	21253	19442	20069.7	23666.3	22362	23250.3	21638.3	20940.7	21205.3	11646.3	11489.7	11514.7	8799.67	8985.33	11047.5	11700.7	12214	11444.7	11526	11810
DnaJ homolog subfamily C member 7 OS=Homo sapiens OX=9606 GN=DNAJC7 PE=1 SV=2	6.59	57239.3	3277.61	Q99615	26	43.93	0	DNJC7_HUMAN				15295.3	14423	15867.7	13753.3	13204.7	14332	4238.33	3403.33	3711		3273	3441.5					2536	2476	18844	19347.3	19291.3	19190.7	17298	19312.7	15604.3	17256	17695	3151	3100.67	3390.33	2786	3193	2736	3161.5	2473		4281	3297.5
Ferritin heavy chain OS=Homo sapiens OX=9606 GN=FTH1 PE=1 SV=2	5.2	21396.8	3264.44	P02794	5	30.05	0	FRIH_HUMAN	18299.7	14332.7	14343.5	15581	14252	20119	11841.5	10803	15802.5	13111.3	14751.3	14495	18916	19101.7	21204.5	19698	19653	27740	22827.3	22477.7	29638	1386			1369	1477	1321	2228	1820		5378	4931	5418	50246	46057	50371	41160	39951	38937	28653	30088
U6 snRNA-associated Sm-like protein LSm6 OS=Homo sapiens OX=9606 GN=LSM6 PE=1 SV=1	10	9184.62	3259.6	P62312	3	32.5	0	LSM6_HUMAN	6343	6825.5	7815	3095.5	2092	3602			4113	4480.33	5005	4642.33	4403.5	4376.67	5111.33	6149.33	6778	7797	6887.33	7334.33	8514.33	3387	3693	3651	3784	4425	4592.5	4544		5161	5925.67	6107.67	6375.67	7019	7254.67	7100.5	9145.5	9425	9196.5	10381.5	10839.7
ADP-ribosylation factor 6 OS=Homo sapiens OX=9606 GN=ARF6 PE=1 SV=2	9.35	20196.3	3257.3	P62330	5	36.57	0	ARF6_HUMAN				6891.67	5106.52	5922.33	8154.33	6344.22	6741	5551.67	3898.14	4895	941.77	860.108	1556.47							8883.5	7794.67	7360.33	5987	5436.67	6093.33	5459.13	6010.5	4736.92	4334.67	3547.87	3740.33	2391.69	2372.91	2126.27				1953.64	1246.28
40S ribosomal protein S27-like OS=Homo sapiens OX=9606 GN=RPS27L PE=1 SV=3	9.99	9819.35	3251.5	Q71UM5	2	28.57	0	RS27L_HUMAN		3235	4212	9133	8628	9994.5	8496	7701	9007	5986	5446	5876	4779	3749	4245				3519.5	3663	4281	9334.5	9208	9544	7298	7198	7687	6423.5	6393	6599	5420	4921	5572	5427	6560	5507				6299	6452
Proteasome activator complex subunit 2 OS=Homo sapiens OX=9606 GN=PSME2 PE=1 SV=4	5.42	27572.8	3251.16	Q9UL46	11	56.07	0	PSME2_HUMAN	17145	15575	15308.5	4955	8865	8744	3058	11313.3	5533.33	13149.3	14649.3	10798.7	6992	4410	7156	8029	6737	7270	12380	8558.5	12379	6775	7089.67	10168.5	10976.5	7997.67	11386	11993.7	12499	13074.3	21496.7	23960	34442	158588	163242	155487	221528	225538	230330	162586	163275
Heterogeneous nuclear ribonucleoprotein M OS=Homo sapiens OX=9606 GN=HNRNPM PE=1 SV=3	9.1	77801.1	3250.93	P52272	31	50	0	HNRPM_HUMAN	15481.3	14808	14776.3	10777.3	12415.3	9839.67	13825.3	13590	10912.3	11759.3	11756.3	10316.3	16222.3	13788.7	15462.7	42223.3	37493.3	42934.3	8239.33	8865.33	7868	17295.3	18219.7	17060.3	18647.7	14264.3	17122	18612	18599.3	17587.3	19786.3	19193.3	19256.3	72453.7	71533	72832.3	20251	21876.3	17537.7	12441	15420
6-phosphogluconolactonase OS=Homo sapiens OX=9606 GN=PGLS PE=1 SV=2	5.67	27832	3245.62	O95336	11	56.98	0	6PGL_HUMAN	35056.7	31950.7	33267	22187.7	22358.3	22548.7	21797.3	22094.3	22003.3	27300.7	27710.3	27473	28016	28967.3	27155	31537.7	29436.3	29679	15283	14898.7	14590.3	18899	18859	20347	17582.7	19427.3	17882	18831.7	18942.3	20203.3	26105	25887	26356.7	27693.3	29392.7	29545	27310.7	27628	26592.3	8724.67	8980
Vacuolar protein sorting-associated protein 26A OS=Homo sapiens OX=9606 GN=VPS26A PE=1 SV=2	6.15	38284	3244.62	O75436	15	55.96	0	VP26A_HUMAN	11012.7	10235.3	10799	17343.3	16600	13348	19665.7	17968	14498.7	21135	18751.3	16492	11669.7	12336.7	9823.67	3694.5	4203	4304.33	5317	3774	3092.33	14103.3	14167.3	14338.7	15606.7	15122.3	15680.7	15311.3	15143	15537.7	16828.3	16651.3	16172.7	12499.7	11721.3	11677.3	3697.67	4735	4016.5	5246.33	5298
RNA-splicing ligase RtcB homolog OS=Homo sapiens OX=9606 GN=RTCB PE=1 SV=1	6.84	55723.7	3225.12	Q9Y3I0	21	46.93	0	RTCB_HUMAN	13507	12685.3	12465.7	29955	30870	42024.3	23736.7	27834	33878	15225.3	15990.3	18467.7	11558.7	12474	13885	8564.33	8257.33	8422	5604.67	5279	7565	26276.7	26024.7	26310.3	29055.3	28615.7	30185.3	30564	29562	29394.7	18750.7	18483.7	19628.7	18465	18647	17765.3	9977.33	10285	10007.7	7632.67	6916
Keratin_ type I cytoskeletal 24 OS=Homo sapiens OX=9606 GN=KRT24 PE=1 SV=1	4.7	55600.7	3223.76	Q2M2I5	11	22.29	0	K1C24_HUMAN	11664.1	11765.1	11419.7	5966.94	7976.47	9606	6408.28	7195.33	9777.67	9321.33	8603.67	9540.33	7512.92	7145.43	6148.67	11553.3	11151.3	9600.33	7156.49	6868.79	10148	9267.67	9320.67	9327.67	6565.67	7422.67	7088.67	8002	7480	8071.33	5030.33	4541.67	5530	7613.54	7288.87	8267.84	18463.1	19635.2	20870.6	6134.67	5787.33
Small nuclear ribonucleoprotein-associated protein N OS=Homo sapiens OX=9606 GN=SNRPN PE=1 SV=1	11.74	24785.2	3216.34	P63162	7	24.58	0	RSMN_HUMAN	11101	13183.5	10432.7	12216	15064	10242.3	6843	7130	6432	11336.7	9602.33	12126.7	3272.33	3381.5	6020.67	9998.67	10608.3	11161.3	11884.3	11558.3	11993.7	22487.7	21507.7	22141.3	20608.3	21590.7	21362.3	20979.3	22669.7	22584	29865	24629.7	24408.3	18510.3	18935	18073	23184.5	21606.7	15435.3	23951.7	20888.3
COP9 signalosome complex subunit 5 OS=Homo sapiens OX=9606 GN=COPS5 PE=1 SV=4	6.12	37807	3214.16	Q92905	15	52.99	0	CSN5_HUMAN	10809.3	10774	9615.67	20999.3	18455.7	14482.7	19396	18827.7	12950.3	18586.7	18136.7	16690	9867.67	10973	9092	5831	5148	5621.33	9094	7173	7081	14018.3	13420.3	16092	12244.3	12166.7	14425.3	12012.7	13463.3	15061	16030.7	16039.7	15081.7	9560.33	9827.67	10275	4259.67	3419	6177	4072.5	3533
Signal recognition particle 9 kDa protein OS=Homo sapiens OX=9606 GN=SRP9 PE=1 SV=2	8.2	10225.8	3211.6	P49458	3	31.4	0	SRP09_HUMAN	3809.5	4434	4397	4752.5	4318.5	5307	3235	2818.5	4403.5	3683	3039.5	5005	3101	3514	4331.5	5351	5748.5	6848.5	4856	5935	6675	6162	7679.5	7794	8671	9105.5	9474.5	8563	9101	9137	8832	9761	9869.5	10576.5	10831.5	10560	11808.5	11258.5	10610.5	17726.5	16376.5
Pyruvate dehydrogenase E1 component subunit beta_ mitochondrial OS=Homo sapiens OX=9606 GN=PDHB PE=1 SV=3	6.23	39575.7	3211.18	P11177	13	42.34	0	ODPB_HUMAN				15627	13774.7	13942	9725	12032.7	11268.3	6678.67	6378	7374			2280.33							10896.7	12746.3	11783	11923.3	12488.3	11850.3	10659	10475	10707.3	6486.33	6285	6420.33	3170.67	3157.67	3164				3330	3280
RNA-binding protein EWS OS=Homo sapiens OX=9606 GN=EWSR1 PE=1 SV=1	9.54	68763.5	3210.86	Q01844	12	19.21	0	EWS_HUMAN	48065.7	52211	49812.3	35604.3	35974.7	42446.7	35686.7	35429.3	40447.7	46389	46229.3	50882.7	57099.3	58832	61877.3	69187	68325.7	69485.7	72384.7	71441.3	87736.7	30572	30348	29398.3	34340.7	32109	34353.7	37367.3	38841	36239.7	51689.3	47362.7	44261	52712.3	50232	46699	61365.3	54764.3	46473.3	62246.3	60043.7
Aconitate hydratase_ mitochondrial OS=Homo sapiens OX=9606 GN=ACO2 PE=1 SV=2	7.35	86166.9	3204.83	Q99798	29	41.54	0	ACON_HUMAN				24459	25682	22807.3	21323	21967	19624.3	4902	3589	4346.33	2277	3225	2711							12346	11462	11103	11313.7	10221.3	10760	11160.7	10668.7	10525.7	3322	3395.33	3613.33	2875	2226	2380				3283.33	3364
ATP-dependent RNA helicase A OS=Homo sapiens OX=9606 GN=DHX9 PE=1 SV=4	6.43	142270	3194.18	Q08211	41	42.13	0	DHX9_HUMAN		3173		23898	26526	25324.3	19225.7	21223.7	18426.3	13508.3	12878.7	11337.7	4234.67	3681.67	4631			3445.5	3148.5	3136	3133	25134.3	26452.7	25299	25372	23836	26038.3	21724.7	21382.7	20709.7	14237.7	13155.7	13559.7	7476	7236.67	7300	3825	3422.33	3486.67	10176.7	9511.33
Coatomer subunit zeta-1 OS=Homo sapiens OX=9606 GN=COPZ1 PE=1 SV=1	4.5	20255.3	3187.79	P61923	3	25.99	0	COPZ1_HUMAN	13164	8353	9005	10729.7	11081.7	9582.33	12270	12295.3	9939.33	12074	11354	10377.7	7338.33	7516.67	6772	12406	7591	5737	7325	6952	5699	8535	8520.33	8628.67	8589.67	9263.33	9287.33	9122.67	9078	9660	8646.33	9729.67	10293.7	5378	6771.5	6933	15644	18741	22003	16775	18128
ATP-dependent RNA helicase DDX1 OS=Homo sapiens OX=9606 GN=DDX1 PE=1 SV=2	6.84	83401.7	3187.38	Q92499	26	39.46	0	DDX1_HUMAN		7661	6816	25705	25204.3	26787	24968.7	25599.3	27728	12102	12235	11819	4380	4708	8037	7714	19120	15983	7540	11298.7	21296	22497.3	23776.7	24107.7	24448.7	23730	24409.3	21886.3	21458.3	21457	6702.67	7123.67	9744.67	3952.67	4804.67	7407.67					3329
c-Myc-binding protein OS=Homo sapiens OX=9606 GN=MYCBP PE=1 SV=3	5.61	11966.7	3174.4	Q99417	5	65.05	0	MYCBP_HUMAN				2323	3113	3844.33		2856.67	3688	2309	2451	2734.33	3607.5	2615	4417.67			3600	3163		4719	4826.33	4650.67	4849.67	5825	7850.5	5481.67	6853	5622.33	6844.5	4156	4289.33	5864	4996.67	4553.33	5040	5958.5	5786	6234	8980.5	8959.5
Eukaryotic translation initiation factor 4B OS=Homo sapiens OX=9606 GN=EIF4B PE=1 SV=2	5.37	69208.3	3172.17	P23588	27	38.95	0	IF4B_HUMAN	27415.7	26706.3	26624	21475.7	21417	30181.7	20437.3	20988.3	31288.7	21286.7	25476.7	35296.7	32254.3	30105.7	45467	37395.3	34732.7	44078.7	37330.3	38770.7	56279	42705	41402	41970.7	37854.3	40778.3	40188	38627.3	37406.7	38032.7	45725	45730.3	48305.7	56550	57192	60797.7	74771.3	73578	74179.3	77835.7	69963.7
Hydroxymethylglutaryl-CoA synthase_ cytoplasmic OS=Homo sapiens OX=9606 GN=HMGCS1 PE=1 SV=2	5.06	57864	3167.05	Q01581	17	43.27	0	HMCS1_HUMAN	5727	6617.67	6785.67	18126.7	17689	16103.7	17920	17124.3	17247.2	19558.3	18318.8	20388.2	6532.33	6360	8072.67		1650.28	1349.15	3013	4560	4400.33	30877.3	30812	29503.7	29262.3	31405	30374.7	32128	31861.3	31512.7	27023	26253.7	25190.7	14307.3	13689.3	14175.7	6519.33	6593.67	5335	7437	7321.5
Peripherin OS=Homo sapiens OX=9606 GN=PRPH PE=1 SV=2	5.21	53765	3166.56	P41219	13	31.49	0	PERI_HUMAN	145131	145058	160541	85719.9	82996.7	85457	106166	98420.7	109497	128919	114089	133453	140104	139378	159245	124493	109781	134643	156943	142524	180662	12567.5	12581.6	12713	18009.4	19057.6	18641.8	22667.7	23039.5	21914.2	38291.6	36051	40518.6	25294.3	24445.9	22955.4	2274.91	1989.77	1840.07	2621.52	2637.02
T-complex protein 1 subunit zeta-2 OS=Homo sapiens OX=9606 GN=CCT6B PE=1 SV=5	6.92	58391.8	3166.1	Q92526	7	13.02	0	TCPW_HUMAN				5310.53	5615.41	4766.3	3983.15	3855.4	3642.02	4101.18	4327.4	4066.74	10387.3	9933.39	11970.2	7072.43	8516.18	6853.55				3786.39	3290.99	2837.79	3165.54	2610.28	2826.82	3530.8	2970.54	2878.34	3623.3	3927.5	3279.28	4129.3	3996.96	3853.13
Replication protein A 70 kDa DNA-binding subunit OS=Homo sapiens OX=9606 GN=RPA1 PE=1 SV=2	6.98	68765.6	3154.99	P27694	21	45.13	0	RFA1_HUMAN	9838	11285.7	11261	22780.7	19915.3	20863.3	20567	18217.3	18943.7	16678.3	15310.3	16846	9650.33	9245.33	9070	5942	7083.33	8744.33	5767	5927	9155.67	20808.7	21740.3	22080.3	20441.7	21449	21783.7	21555.7	20697.3	20621.7	12236	12682	13165.3	9448.33	9166.67	9651.67	4511.33	4835	4375	4294	4487
Hepatoma-derived growth factor-related protein 2 OS=Homo sapiens OX=9606 GN=HDGFL2 PE=1 SV=1	7.39	74488	3154.82	Q7Z4V5	27	40.54	0	HDGR2_HUMAN	39037.7	39670.3	37624.3	23295.3	22885.3	21076.7	25383.3	23831	25290	25006	24630	26685	25211	25926	27349.3	30149.3	30526.3	31622.7	35497.3	34556.7	41022.3	22599	23567	22832.3	23107	23768.7	23961	24373.7	24069.3	23710.7	29547.7	29762.7	29250	28439.7	28677.7	29463	35002.3	34314.3	33267.7	39659.3	37997.7
DNA replication licensing factor MCM4 OS=Homo sapiens OX=9606 GN=MCM4 PE=1 SV=5	6.31	97128.4	3148.58	P33991	30	41.6	0	MCM4_HUMAN	5771	4559	6025	30099	30460.3	22988	23385.3	24315.3	21297.7	11483	11197.7	9544.67	4304.67	3791.33	4197.67	3979	3810.5	3776.5	4288.5	4196.67	4150.67	17450	16893.3	17293	16459	17790	16561.7	16092.7	16121	15628.3	4500	4270.33	5014.33	4007	4406.67	4029	3976.33	3611.5	3070	4726	4832
Ninein OS=Homo sapiens OX=9606 GN=NIN PE=1 SV=4	4.81	245359	3146.84	Q8N4C6	23	11.1	0	NIN_HUMAN	4646	4375	4085	9895	8406	8170	19679	19675	15946.3	11066.3	11842	12397.7	11599	11170.7	13305.7	4334	4247.67	4682	5273.33	5362	6489.67	7064.33	6944	5244.67	7130.33	10120.3	7207.33	10362	12607.3	8350.33	12098.3	12071.7	13899	13146.3	13970	14687.7	9683	11575.7	12176	4155.33	5422.33
GTP-binding protein SAR1b OS=Homo sapiens OX=9606 GN=SAR1B PE=1 SV=1	5.72	22524	3143.37	Q9Y6B6	8	43.94	0	SAR1B_HUMAN	19302	15423	18083	7795.56	7946.32	8103.2	9790.84	10234.1	9934.85	9502.67	9824.67	9749	10148	9489.5	10052	5080	4195	5320			2427	9536.48	10156.5	10532.3	8191.75	9008.06	8573.22	7916.47	8010.36	8852.51	8495.73	8643.65	8679.24	9686.9	7799.96	7720.68	4347.5	4265	4470	2351.24	2326.36
Amidophosphoribosyltransferase OS=Homo sapiens OX=9606 GN=PPAT PE=1 SV=1	6.33	58197.4	3126.66	Q06203	19	40.81	0	PUR1_HUMAN	77529	79142.3	79673.3	67661	67968	73795.7	81445	82505	91572.7	77530.7	76547	84302.3	95116	98357.3	101127	74289.7	72001	76608.7	61895.7	63662.3	73213.7	47521.3	49734.7	49953	44819.7	46180	46875.3	41513.3	42487.3	44822.3	41855.7	42710.7	44855	42083.7	43011.7	43640.7	53451.3	54293.3	57335	30092.7	33006.7
Casein kinase II subunit alpha OS=Homo sapiens OX=9606 GN=CSNK2A1 PE=1 SV=1	7.61	45257.7	3119.01	P68400	16	51.15	0	CSK21_HUMAN	6583.67	7316.33	6958.67	18914.7	18131.7	23033	16869	18065.3	22514	18282	15771.3	19588.7	8012.33	8365.33	8825.67	4597	3760	2492.33	4092	3076	3237.5	33431	32138	30243.7	30166.7	30402.7	30055.3	30731.3	29851.3	28814	34162	34391.3	34253	21275	21208	21779.7	2612
60S ribosomal protein L27 OS=Homo sapiens OX=9606 GN=RPL27 PE=1 SV=2	11.22	15797.8	3116.51	P61353	4	36.03	0	RL27_HUMAN	6297.5	5786	7224.5	10536	9534	17484	10589	14850	14535	7672	9384.5	9205.5	7894	7525	9612	4096	3089	5002.5	7933.33	6687	9267	9847	8803	4508.5	9774.5	6467	10064	8576.5	8159	7629	6588	7011	6384	7594	5053	4795.5				3164	3210
Ras-related protein Rab-7a OS=Homo sapiens OX=9606 GN=RAB7A PE=1 SV=1	6.57	23774.9	3113.77	P51149	10	50.24	0	RAB7A_HUMAN	7780	8926	8807	10888.3	11200.3	12878	11840.3	10258	12526.7	14002.7	12946.3	13206.3	8393.67	8458	8227	6910.33	5820.33	7176	6640.33	5147.33	7574	11761.3	11963.3	11152.3	11552.3	11280.7	11820	12132.7	11675.3	11948.3	14277	14302.7	14000.3	9406.67	10648.7	10456.7	2793	3238	2834	9146	9088.5
Methionine adenosyltransferase 2 subunit beta OS=Homo sapiens OX=9606 GN=MAT2B PE=1 SV=1	7.02	37894	3100.81	Q9NZL9	13	38.02	0	MAT2B_HUMAN	16852	16596	16503	14911	14473.7	14012.3	14807.3	14740	13822.3	19287.7	18471.7	17015.7	10610.3	10504.7	10531	5632.67	5537.67	5404.33	5089	6834.5	5513	15038.3	13992.3	13351.3	14884.3	15586.3	15122.3	16423	16170.3	16250.3	18739	18700.3	19326.7	15020.7	17070	16351	6882.67	8618	6714	4752	7728.33
NPC intracellular cholesterol transporter 2 OS=Homo sapiens OX=9606 GN=NPC2 PE=1 SV=1	7.63	16912.4	3100.73	P61916	3	23.18	0	NPC2_HUMAN	19195	16113	14702.5	9111	11750	10794.5	6050	10590	9531.5	14554	25326	18486	20718.5	26221.5	20262.5	16240	20976.5	17637.5	20297	25354.5	22704					5309	5425					7652	7606	8241		8127	12862	12925	11777	12293	12344
DNA replication licensing factor MCM5 OS=Homo sapiens OX=9606 GN=MCM5 PE=1 SV=5	8.38	83084.1	3090.26	P33992	35	52.04	0	MCM5_HUMAN	6694.67	7222	6824.33	27447.7	26663	31810.3	26024.3	27369	33951.3	15927.3	14686.3	19593.7	9788.33	8218.67	8807	12290	5850	5990.67	5876.67	6063.33	6763.33	23890	22498	22609.3	25518	22524.3	25590.7	21899.3	20823.7	19455.3	10219	10286.7	10440.7	8223.67	8668.67	8314	13042	6958.33	8870.5	5968.5	8560
Keratin_ type I cytoskeletal 18 OS=Homo sapiens OX=9606 GN=KRT18 PE=1 SV=2	5.17	48057.9	3089.95	P05783	20	47.44	0	K1C18_HUMAN	14628.7	14451.7	14199	13149.3	12884	13836.7	13708.3	13902.3	14906.7	14942	14596.7	15597.3	11634.7	11394	10517.7	14329.3	13655.3	11208.7	18388.7	18910.3	12444	11403.7	12530.7	12222.3	12396	13238	12960	12879.3	12972	12985	10784.3	11010.7	10742.3	6612.33	5888	6630.33	8743.33	6262.33	8132.33	11376.7	10403
U1 small nuclear ribonucleoprotein 70 kDa OS=Homo sapiens OX=9606 GN=SNRNP70 PE=1 SV=2	10.46	51613.8	3088.3	P08621	15	40.96	0	RU17_HUMAN	4249.5	3858	4440.5	22665.3	21491	21116.3	23042.7	22565	19400.7	13712.7	13115.3	12263.7	5668.67	6318	6311	4778	4761	4253	5682.67	5680.67	6930.67	27482.3	28316	26766	31104	25043	27579.7	27179.3	27947	26665	14347.3	14640	13411.7	7173.33	7209	6807	4232	4511.5	4413.5	4258.33	4353.5
Histone deacetylase 2 OS=Homo sapiens OX=9606 GN=HDAC2 PE=1 SV=2	5.53	55934.6	3079.16	Q92769	11	28.69	0	HDAC2_HUMAN	9097.33	9627.67	9000.67	19862.4	19829.4	26006.7	18964.8	18540	24033.6	17110	14602.8	18477.8	7448.9	6919.61	9289.47	2935.82	3378.35	4445.97	4383.15	4295.31	5508.33	30557.3	31365.5	28737.2	25165.2	26909.5	25643.9	24423	25411	24682.4	14897.3	15168.4	15184.7	10127.3	9834.79	9594.23	10331.7	10511.3	10432	6855.85	6732.67
Interleukin enhancer-binding factor 3 OS=Homo sapiens OX=9606 GN=ILF3 PE=1 SV=3	9.05	95737.7	3065.93	Q12906	28	42.62	0	ILF3_HUMAN	22081	21889.7	21559.3	30739.7	30454.1	31028.6	23736.7	22322	21111.1	23452	22242.7	21673.3	17955.3	18359	18077.7	7057	7192	7402	6846.67	6480.67	7252	27334.9	31420.6	30209.7	32273	27064	32979.7	30516	29635	30213.3	36711	37997	37261.3	35897	35334.3	35837.7	9276.67	9001.67	8472.33	12113.3	11753
ATP synthase-coupling factor 6_ mitochondrial OS=Homo sapiens OX=9606 GN=ATP5PF PE=1 SV=1	10.17	12587.5	3064.23	P18859	2	20.37	0	ATP5J_HUMAN																2899	2456	3597	10389	5505	9046.5																			20439	20006
ADP/ATP translocase 2 OS=Homo sapiens OX=9606 GN=SLC25A5 PE=1 SV=7	10.16	33080.4	3058.68	P05141	9	29.53	0	ADT2_HUMAN						1218				2191		2624			2101	4638	4411	5436.67	9602.67	8918	9728.33		2142	1960	1595		2511.5	1659	2282	2574.5	7086.67	6393.33	6288.67	8083.33	7554.33	7612.5	7394.33	7220.33	7170.33	51138	50828
Protein FAM50A OS=Homo sapiens OX=9606 GN=FAM50A PE=1 SV=2	6.43	40241.7	3030.38	Q14320	13	36.28	0	FA50A_HUMAN	5263.03	5857.84	4920.48	14860	15883.7	16292.3	14040.2	14692.1	14913.3	10922.3	10741.6	10830	7740.03	10776.5	7909	4336	5503.62	6870.33	4422.67	6243.71	6317.33	15157.7	15938.7	15276.7	13163.3	8055.42	13615.7	8940	9217.67	8712	6420.67	5898	5346.67	7316.33	6319.33	6174.01	6468.74	6434.67	6154.33	8078	4538.98
Cathepsin D OS=Homo sapiens OX=9606 GN=CTSD PE=1 SV=1	6.12	45065.5	3027.9	P07339	13	31.8	0	CATD_HUMAN	26524.7	25669.7	24780	21272.3	22279	23190	20065	20760.7	20636	28083.3	23479.3	24013.7	19832.7	19257.7	19709.7	21474.3	20738	21370	15064.3	16094	16390	23268.7	24723	22704.3	21598	22400	22541.7	23818	23061	25684	31541	30217	30671.7	35781	32684.7	31003.7	19094	20281.3	18477	8181.33	8052.33
Calpain small subunit 1 OS=Homo sapiens OX=9606 GN=CAPNS1 PE=1 SV=1	4.87	28486.9	3016.75	P04632	6	24.63	0	CPNS1_HUMAN	19779.3	18706	18559	10329.7	10217.5	10192.9	12464.1	12116.4	12338.6	14586.6	14777.6	14842.7	19451.7	17878.7	17891.7	10490.3	9567.33	8746.33	6009	5444.67	4920.5	13489.3	13703.9	14291.7	11735.8	12252.7	12280.7	13334.7	12827.8	13932.5	19991	18615	20858.3	16937.7	16730.7	15899.3	9062	9111	8379.67	6871.67	7632.67
Vacuolar protein sorting-associated protein 35 OS=Homo sapiens OX=9606 GN=VPS35 PE=1 SV=2	5.18	92505.6	3014.32	Q96QK1	25	33.54	0	VPS35_HUMAN	4228.67	4204.67	3929	18763	18205.3	18763.7	22512	20728.3	22426	24392.7	22732.3	24624	4687	4901	5575.67			3179.67	3025	3383	3692	19024	18837	18737	17298.3	18587	17458.3	18502.3	17588	17579.7	17161.3	17088	17545	6202.67	5904.33	6278.67	4872.33	4954.33	6041.33	8680.67	8575.67
Transportin-1 OS=Homo sapiens OX=9606 GN=TNPO1 PE=1 SV=2	4.65	103838	3007.33	Q92973	24	31.4	0	TNPO1_HUMAN	6211	5649	4349.5	18379.6	18077.3	19698.7	17458	18493.3	20061.3	11406.7	11544	12344	8210.67	7977.67	7711.67		3007.67	3649	3042	3704.5	4081.33	20259	21107	20036.3	18425.7	16527.8	16379.8	17767.7	18139.7	17687.5	9233.67	8745.67	9414.33	6891	6669.67	6806	5802	5823	5255.33	7678.74	8169.33
DNA-directed RNA polymerases I_ II_ and III subunit RPABC1 OS=Homo sapiens OX=9606 GN=POLR2E PE=1 SV=4	5.61	24665.3	3006.97	P19388	7	36.19	0	RPAB1_HUMAN	103942	67929	65986	15579.7	14480.7	12408.7	18868	15811.7	11329.3	20109	19084	16847	22620.7	32912	20696.3	55778.5	38356.3	30373	61498.7	81027.5	53371	10983.7	11427	10470	11100.7	12618.3	12070.3	9875.67	9251.67	10157.3	12186	13187.7	12473.3	10016	9966	9890.33	13751.7	12994.3	12484	20249.7	20211.3
LRP chaperone MESD OS=Homo sapiens OX=9606 GN=MESD PE=1 SV=2	7.96	26247.8	2995.66	Q14696	15	51.28	0	MESD_HUMAN	26338	26856.7	25972.7	22119.7	22917.3	19509.7	23018	24381.3	19353.7	28498.7	29055.3	24309	28343.7	28075.7	28647.3	25777.3	25409	25916.7	30154.7	29275.3	31814	18304	17855.7	18471.3	22026.7	21505.3	21768	21360.7	22591	22269.3	25269.3	25277.3	26054.3	22178.3	23776.7	23105	20861.7	19965	19069	25806	25459
Cysteine and glycine-rich protein 2 OS=Homo sapiens OX=9606 GN=CSRP2 PE=1 SV=3	8.59	21866.3	2993.57	Q16527	5	35.75	0	CSRP2_HUMAN	10374	9733.5	9764.5	5907.33	6637.33	7349	5414.67	6540	6707	6750	10065.5	7685.67	7235.5	6118	9549.67	9215	8908.67	12200.3	8742.67	12045	12016.7	8714.33	8764.33	8456	9373.67	9730.67	9946.67	10235.7	10716.3	10220	12642.3	11060.3	11543.7	11521	12082	13606.3	13624.7	14582	14760.7	17272	15840.7
Calcium-regulated heat-stable protein 1 OS=Homo sapiens OX=9606 GN=CARHSP1 PE=1 SV=2	8.27	16120.2	2992.03	Q9Y2V2	4	50.34	0	CHSP1_HUMAN	10301.5	12151	12564.5	19420	23593	16612	17298	21930	14753	12915.5	22520	19028.5	15727	17327	13871	9386.5	9775.5	9594	13026.5	14033	12072.5	12634	12068	12440	14657	15592	14607	13850	13924	13239	13087	13468	13219	11457	8966.33	8810	11790	11103	10435	15931	14878
Coiled-coil domain-containing protein 6 OS=Homo sapiens OX=9606 GN=CCDC6 PE=1 SV=2	7.01	53462.1	2990.33	Q16204	18	39.45	0	CCDC6_HUMAN	7323.33	20264.7	16596	10023	10930	11183.3	10838.7	11289	11224	16259.7	16815	14860.3	15585.7	15304.7	13228	10583	14047.3	13827.3	12522.7	12807.3	9975.67	7781	7763.67	8110.33	8298.33	8812.67	9281.33	7998	10140.3	8830	10945	11054.7	10829	9959	10063.7	9406.67	13217	12259.3	11579.3	14424	12996
Elongin-C OS=Homo sapiens OX=9606 GN=ELOC PE=1 SV=1	4.54	12644.3	2988.55	Q15369	5	46.43	0	ELOC_HUMAN	15870.5	16476.5	15587.5	23684.3	23996.3	35833	23827.3	25023.3	37839	28282	29340.3	41975.3	12523.3	12796.3	21184	9990.5	9605	8923.33	11548.5	12252.5	10168	21182.3	32816	33815	22231.7	30327.7	31364.3	24652.7	34627.7	35034.7	35565	34158.7	36610.7	14256.3	20416.5	19264.5	13859.5	14615	14189.5	14724	15721.5
Retinal dehydrogenase 2 OS=Homo sapiens OX=9606 GN=ALDH1A2 PE=1 SV=3	5.7	57180.3	2984.64	O94788	23	45.17	0	AL1A2_HUMAN	9532.33	9452.33	8831.42	7411	7232	9848	7854	9048.67	9994.67	9788.33	9411.33	11138.7	10224	9855	11856	17234.7	15243.3	19284.3	5532.09	6752.76	8540.52	8596.67	7896	7693	7784.33	7934	8020.67	8891	8619.67	8294.67	11902.1	12363.5	11861.4	13755	14277.7	12923	13607	16154.3	15569.3	8550.33	9378.67
Ras-related protein Rab-6B OS=Homo sapiens OX=9606 GN=RAB6B PE=1 SV=1	5.22	23575.8	2973.29	Q9NRW1	4	18.75	0	RAB6B_HUMAN	2596.35	4862.42	2673.63	4403.81	3337.25	1222.17	6279	4677.42	4155.69	4459.18	6113.22	5374.15	8184	8260		12722	10937	12887	13336.5	12614	12520	2660.9	3273.9	3393.2	2575.48	6338	6280	4247.52	7858	7763	6728.88	12940	12777	11307	11591	11874	12488	12392	12387	18431	17835
V-type proton ATPase subunit G 1 OS=Homo sapiens OX=9606 GN=ATP6V1G1 PE=1 SV=3	9.24	13871.6	2962.4	O75348	4	26.27	0	VATG1_HUMAN	6351	6600	5931	7874	8290	8831	7843	8504	9651	9103	9078	11027	8986	9680	6329.5	3407	3162	4374	4923	4925	6389	5693.67	8412	7476	6366	6616	10930	9669	6605	8809.5	12573	6929.5	6365.5	6515.5	10544	5329.33	7918	7704	4926.5	10330	9427
DNA replication licensing factor MCM2 OS=Homo sapiens OX=9606 GN=MCM2 PE=1 SV=4	5.2	102581	2955.18	P49736	37	47.79	0	MCM2_HUMAN	6367	6364.33	6233.67	25903.3	24911.3	25280.3	26522	24676	25784.7	13475.7	12531.7	14138.7	5122	5878	7333	4115.33	6309.67	8817.67	5843	6487.33	10324.7	16158.7	17109.7	16343.7	16954	17087	17379.3	17841.7	18069.7	16626	6994.67	7041.67	7191.67	5693	5608.33	6007.33	3920	3831	4850.33	4878.67	3893
Beta-centractin OS=Homo sapiens OX=9606 GN=ACTR1B PE=1 SV=1	5.99	42407.5	2953.34	P42025	16	51.33	0	ACTY_HUMAN	11072.5	11678.3	11586.4	12559.7	11586.6	15448.8	19247.3	18354.9	23306.1	11440.7	11040.5	12675.4	11655.1	10718.8	12038	10239.4	9973.03	11374.7	9892	9593.35	10331.7	19803.1	19557	18267.4	24208.8	20471.2	23045.7	25650.1	24236.8	22174.1	16455.7	15559.2	15750.4	11688.2	11867.9	11110.6	9100.33	8738.63	7049.68	8255.67	7719.67
Keratin_ type II cytoskeletal 7 OS=Homo sapiens OX=9606 GN=KRT7 PE=1 SV=5	5.22	51442.8	2933.16	P08729	12	21.32	0	K2C7_HUMAN	10984.8	9461.29	9536.6	5517.47	5811.26	15147	12164	3701.29	12137.9	5079.77	15513.2	16051.4	5001.11	4674.36	10181.4	8255.67	9278.33	10703	3285.57	2867.52	5273	19341.7	18133.3	19057.3	18147.3	18823.8	18261.1	17570.2	17363	17141.7	17944.3	18759	17841.6	12601.7	15772.8	13766.7	6057.62	6065.16	6624.5	5687.95	5948.31
Glyoxalase domain-containing protein 4 OS=Homo sapiens OX=9606 GN=GLOD4 PE=1 SV=1	5.26	35192.7	2932.89	Q9HC38	13	38.98	0	GLOD4_HUMAN	11527.3	11198	10661.3	21679	21794	24149	22182	20476.7	25183.7	20058.7	18228.7	21580	16922.7	16675.7	20493.3	7405	6796.33	9321.67	10013.7	9124	10943.7	27508.7	26619.3	25964.7	25738.3	25084.7	25712.3	27617	26625.7	27370.7	15467.3	16059.3	15436	11421	10529.7	10444	7790	8234.67	6997.67	7601.33	8008.67
Replication protein A 32 kDa subunit OS=Homo sapiens OX=9606 GN=RPA2 PE=1 SV=1	5.73	29361	2929.35	P15927	7	34.81	0	RFA2_HUMAN	12467	20494.3	16938	30749.7	29630.3	27153.3	25320	25559	25332.7	27914.7	28558.3	25963.3	22637.7	24294	21310.7	7385	9721.33	8429.67	7706.33	8013.67	8163	21666.7	21097	19969.3	24838.3	21760.7	23555	23056.7	22533	19455.7	15622.7	14803	13900.3	12538	12627	12953.7	9496	9279.5	8067	6287	6023.5
Splicing factor 3B subunit 3 OS=Homo sapiens OX=9606 GN=SF3B3 PE=1 SV=4	4.96	136661	2924.31	Q15393	39	38.54	0	SF3B3_HUMAN	21853.7	20986	20385.7	25245.7	25883.7	22696.3	24201.3	22828.7	22560.7	25357.7	25032	23496	20791.7	21805	19813.3	38059.7	34631	33994.3	13627.3	12715	11600.3	26273.7	26954	25940.7	24020.7	23426.3	24063.3	22575.3	21351.3	22479.7	25101.3	25081	24469.7	25355	25009.7	25033.7	20131.3	20028	18387.3	14017	14689
SH3 domain-binding glutamic acid-rich-like protein 3 OS=Homo sapiens OX=9606 GN=SH3BGRL3 PE=1 SV=1	4.62	10494.8	2918.75	Q9H299	3	31.18	0	SH3L3_HUMAN	10957	6197	11048	3733.5	5169	3863.5	5873	5319.5	4691.33	5743.33	5718.67	6604.67	6967	6446	7413.67	5772.67	6038.67	6944	6230	8298	8400.33	4714.33	4348	4412.67	5749.67	5749.33	5481	6074.67	6411.33	8090	7806.33	11369.5	10528	9276	9184	9859.5	14850	16400	15047	18529	18234
Heterogeneous nuclear ribonucleoprotein D-like OS=Homo sapiens OX=9606 GN=HNRNPDL PE=1 SV=3	9.96	46608.7	2914.33	O14979	12	27.38	0	HNRDL_HUMAN	13974.3	12735.7	12066.3	17781.2	17923.1	18678.3	13488.7	13160	12531.3	11422.8	10193.7	13145	12330.5	12578.7	13961	19557.4	18464.3	21671.8	23712.8	22693.1	23048.2	15890.3	14440.4	19875.7	19215.8	19609	19282.1	15455.3	20050	14658.4	17099.7	15333.4	15435.7	15144.3	13868.6	18384.3	18277.3	15621.2	15535	26774	24841.3
Ganglioside GM2 activator OS=Homo sapiens OX=9606 GN=GM2A PE=1 SV=4	5	21294.6	2911.42	P17900	5	17.62	0	SAP3_HUMAN	21620.7	20997.3	21522.7	8711	7782.67	9463	9891	10964	12869	15350.3	15250.3	16164	21395.7	20209.3	21993	26363	24846.7	23403.3	28317.7	27792	27591.3	5461.67	5525	5619	4561.5	4932	5046	4564.5	4886.5	4984.5	7646.33	7732	7876.33	10007	10571	10827.3	14587.7	13677.7	13867	16015	14952.7
Ankyrin repeat domain-containing protein 20A4 OS=Homo sapiens OX=9606 GN=ANKRD20A4 PE=4 SV=1	7.87	95061.3	2908.44	Q4UJ75	4	3.77	0	A20A4_HUMAN	7387	5812.5	3972	6337.67	5668.33	5162	5046.33	4971.67	2620.5	5720	4827.67	4068	9979	10085		6475.5	7230	4322	11098	11378		2298	2231	2727	1926	2686	3556	2542	2528	2049	3422	3698	3716	4435	4016	5492
Microtubule-associated tumor suppressor candidate 2 OS=Homo sapiens OX=9606 GN=MTUS2 PE=1 SV=3	6.25	150993	2906.32	Q5JR59	5	4.09	0	MTUS2_HUMAN				3759	3477	2748.79	2418	2423	3357													2393.1	2283.54	2207.78	1836	1792.75	1533.12	1317.32	1384.06	1934	1575	1674	1997
N-alpha-acetyltransferase 15_ NatA auxiliary subunit OS=Homo sapiens OX=9606 GN=NAA15 PE=1 SV=1	7.16	102527	2901.72	Q9BXJ9	40	44.11	0	NAA15_HUMAN	6146.67	126515	105079	66545.3	12240.3	15349.7	123304	13700	17792.3	75187.3	17889.7	17641.7	77052	133071	13171	58179.3	4082	6971.67	4253	4256	6052.33	20010	21354	21260.3	16425.7	20400.3	16071	17412.3	18760.7	18363	19612	19856.3	19234.7	8641.67	9017	8888.67	6300.67	5878.67	6114	5976.33	5767.67
60S ribosomal protein L14 OS=Homo sapiens OX=9606 GN=RPL14 PE=1 SV=4	11.64	23545.9	2898.31	P50914	3	13.95	0	RL14_HUMAN	5361	9143	10422	10076.5	12329	6409.5	8127	10185	6583.67	9009	9742.5	7228.33	13663	14810	9130		7925	3926.5	12676	23256	8372	8798.5	5591.5	5145	8065	7928	6342.5	5444	4673	5355	5232.5	4989	6418	3186	3628					4600	4643.5
Beta-hexosaminidase subunit beta OS=Homo sapiens OX=9606 GN=HEXB PE=1 SV=3	6.33	63567.6	2894.14	P07686	20	34.71	0	HEXB_HUMAN	40556.7	41518.7	41713.7	29362.3	32153.7	31596.3	29426	34475	31074	44428.7	42001.7	40452.7	52387	51490.7	45509	33384	32982.3	33356	23632.3	24043.7	23101.3	17918.7	18239.7	17873.3	17672.3	16280	17180.3	18629.3	18235.7	18929	24310	23786	22275.3	31912	26014	24674.7	20287	19404.3	20013.7	6505.33	7038
Pre-mRNA-processing factor 19 OS=Homo sapiens OX=9606 GN=PRPF19 PE=1 SV=1	6.18	55637.1	2893.28	Q9UMS4	12	35.12	0	PRP19_HUMAN	30889.7	34999	34835.3	18511.3	19160.3	13772	23271	25488.7	19144.7	43392.3	43042	34669.7	37371.7	38633.3	28938.3	8346.67	9546	7894.33	6442.33	8312.33	7555.67	9343.33	9420.67	7795	8199	10642.3	10645.7	12559	12146	12665.3	33971.3	30656	31818	31292.3	30018	30343.7	9085	9233.33	10565.3	8107.33	8497.67
Calcium-dependent secretion activator 1 OS=Homo sapiens OX=9606 GN=CADPS PE=1 SV=3	5.38	153870	2890.24	Q9ULU8	5	5.25	0	CAPS1_HUMAN	4990.5	19346	19349	9355	8904.33	9565.33	9617.33	9329	10094	8461.33	7778	8871	9604.67	11348	11538.7	10710.5	13447.5	14328.5	13351	15511.5	11440.3	7679	7374	7424.33	10933	9901.33	10231.3	9932.33	9913.67	9052.33	8198.67	8700.33	9034	7160	7209.67	6939	6247	6474	5189.5	7684	7788
Copine-3 OS=Homo sapiens OX=9606 GN=CPNE3 PE=1 SV=1	5.48	60986.1	2884.22	O75131	13	22.72	0	CPNE3_HUMAN	13828	13542	14013	21317.3	21767.7	21296	20156.3	19916	20576	14346.3	14577.7	14408	12822	12325	2736.67	15630	13273	1380.64	18006	18333	2453.33	17849.7	19060.3	19231	18837	18549	19092.3	19353.3	19010	19821	8605.33	8492.67	8512	3851.33	2213.7	2345.99	2974	3089.5	2923.5	6393.33	5565.67
Polycystin-2 OS=Homo sapiens OX=9606 GN=PKD2 PE=1 SV=3	5.37	110433	2880.24	Q13563	3	2.79	0	PKD2_HUMAN				2008		2300.5			1766			2929										1491	1449	1297			1556			1679	1893	2236	2019	2129	2131
Proteasome assembly chaperone 1 OS=Homo sapiens OX=9606 GN=PSMG1 PE=1 SV=1	6.92	33652.3	2873.11	O95456	7	27.08	0	PSMG1_HUMAN	13000.7	14942.7	14204.7	11637.3	11028.3	16282.3	10855.7	11241.7	17092.3	14396.7	14739	22541.7	11170	11518.7	20020.7	5826	6659.67	9913.67	11968	13187.5	13048	22290.3	23770.7	22709.7	21976.3	20401	23241	20079.3	22359	19132.3	25079	23091	18653.7	23709	25066	24764.3	16402.7	15750.3	15067.7	10946	8157
Glycerol-3-phosphate phosphatase OS=Homo sapiens OX=9606 GN=PGP PE=1 SV=1	5.77	34462.3	2871.01	A6NDG6	9	27.73	0	PGP_HUMAN	18154.7	18219.3	11422.3	6960.67	7017.33	9463	6632.67	7707.67	9473.67	8857.33	10041	12933	16993.3	17670.3	15073	10840.3	11364.7	11583.3	4252	4642	4897.67	9828	7080.67	6921.33	7151	7068.67	7017.33	8301.67	8211.67	7416.33	11204.3	11187	11130	11497.7	11578	11200.3	10444.7	10668.3	11180	2410.5	2551.5
Bifunctional glutamate/proline--tRNA ligase OS=Homo sapiens OX=9606 GN=EPRS PE=1 SV=5	7	172188	2865.98	P07814	60	46.89	0	SYEP_HUMAN	14388.5	15157.5	25422	31587	30113.3	37486.3	11311	10693.3	18030	7159	6445	11571.7	9832	9814.67	16098.7	65556.5	124525	3395	5443.5	6021.5	8285.67	46290.3	43797.7	47122	36709.3	38721.7	39925.3	18323	18378.7	18832.3	7361.33	7173.67	8397	15851.7	15996	15016.3	7969.67	7721.67	7081.33	13054	12508.7
Zinc finger CCCH domain-containing protein 15 OS=Homo sapiens OX=9606 GN=ZC3H15 PE=1 SV=1	5.03	49001.7	2865.53	Q8WU90	17	38.03	0	ZC3HF_HUMAN	12433.3	11210.3	12446.3	19359.7	13262	18150.3	14226.3	12106.7	17618.7	16215.3	18969	18445.3	12583.7	11447.3	15878.7	9996.33	10012.3	12210.3	11231.3	11692	15005	12934.7	12338.3	12771.7	12966	13805.3	11787.3	12380.3	11217	11085.7	12098.7	11145	12271.3	8811	9375	10944	6669	5350.67	6267.33	3632	4541.33
Dihydropyrimidinase-related protein 1 OS=Homo sapiens OX=9606 GN=CRMP1 PE=1 SV=1	6.62	62526.1	2862.43	Q14194	8	12.94	0	DPYL1_HUMAN	14354.4	16575.1	15945.9	23615.5	21823.1	21333.1	34421.1	22666.2	22342	25681.4	23043.3	23206.7	28312.1	21525.6	15267.7	14222.6	11464	13353.4	12928.4	10643.3	17461.1	8371.41	8074.53	7823.29	11585.8	10026.3	11092.3	9780.48	9610.45	9442.38	9107.96	9417.43	8436.04	8284.93	8219.35	7810.25
Coactosin-like protein OS=Homo sapiens OX=9606 GN=COTL1 PE=1 SV=3	5.35	16059.1	2859.95	Q14019	8	40.85	0	COTL1_HUMAN	6971.67	6865	6278.67	9303	9584.33	8388.67	9276.67	9014.67	7904.67	11307	10402	11639	8360.67	7820	8225	7641	6883	8039.67	7207	7438.33	8389.67	11693.7	11340.7	11611.3	12479	12413.3	10462.7	14635.3	13528.3	13724	14045	14630.3	13945.3	10460.3	10673	10640	11257	11563.7	11720	13975.7	12853.3
Clathrin light chain B OS=Homo sapiens OX=9606 GN=CLTB PE=1 SV=1	4.38	25304.6	2859.5	P09497	11	34.5	0	CLCB_HUMAN	21180.7	21041.7	20695	9562	9155.33	10937.7	10059.3	9942	10969	15130.7	13698	15601	22837.7	22456	26374.3	29326.7	29866.7	33132.7	35988.7	36974	42511	11714.3	11004	10092.7	12052.3	11402.3	11825.3	13189	13701.3	14014.3	22914	23597.3	23229	24257	24447.7	23778.3	39581.7	38986.7	38009.7	53945	54191.3
Thioredoxin reductase 1_ cytoplasmic OS=Homo sapiens OX=9606 GN=TXNRD1 PE=1 SV=3	7.13	71725.6	2849.58	Q16881	18	38.06	0	TRXR1_HUMAN	28460.7	27954	30073.7	19988	21238.7	19171.7	26446.3	21661.7	20553	27061.3	28479	25541.3	24829.3	24591.7	26613.7	36760.3	39795	32316	34199	36365	30215	26247.3	23119.7	21866	22072.3	22846.3	20441	23316	24278.7	23249.3	35407	35776.7	37829.7	35094.7	36687	39666.3	44330.3	46326.7	43842	54232	53963.7
Protein NDRG1 OS=Homo sapiens OX=9606 GN=NDRG1 PE=1 SV=1	5.43	43291.8	2846.42	Q92597	11	42.13	0	NDRG1_HUMAN	7224.67	9332.33	8445	13213.3	11873	12870	13154.3	11810.7	13462	14167	13403.3	14825.7	6153.67	6144.33	7028.67	7148.33	7005.67	8490.33	8353.67	9361.33	9798	25538.7	25717.7	25533.7	24958	23309.7	24043.7	25253.3	24692.7	24239	22236.7	21747	20949	11193	10691	10691.3	8807	8762.33	7778	8634.67	8111
Desmin OS=Homo sapiens OX=9606 GN=DES PE=1 SV=3	5.03	53592.9	2845	P17661	16	31.28	0	DESM_HUMAN	9458.37	8781.38	9463.89	7635.07	7952.54	5622.06	9474.83	8892.49	8202.78	11596	11020.3	8993.67	8206.49	6468.75	6800.63	35863.8	37879.2	16019.8	4667.32	4432.51	5727.79	4439.52	4688.22	4525.77	5187.86	5277.01	5268.07	5691.64	5669.87	5385.88	5618.54	5733.82	4824.97	11521.8	12104.2	11223.9	9175.63	7226.43	9272.23	7998.43	7790.69
Actin-related protein 2/3 complex subunit 5-like protein OS=Homo sapiens OX=9606 GN=ARPC5L PE=1 SV=1	6.2	16941.2	2837.84	Q9BPX5	8	66.67	0	ARP5L_HUMAN	8903	8577.37	10195	11534.7	10317	7088.33	10120.7	9057	6561.67	9441.67	7716.67	6572	6421.67	6277.67	6886	5901.94	5945.5	4984.67	2809.54	3295	3112.09	17129.3	14231.3	12553.7	16607.3	12080.7	13317	15847	14003.8	11038.3	10590	9926.67	8968.67	8445	8951	8665.31	5406.08	5101.42	5346.55		2304
TGF-beta-activated kinase 1 and MAP3K7-binding protein 3 OS=Homo sapiens OX=9606 GN=TAB3 PE=1 SV=3	8.54	79394.4	2834.73	Q8N5C8	1	1.83	0	TAB3_HUMAN				4504	6101	8627	4441	8450	12206	4605	4025	7234			2404			3829		2845	5905	4150	6146	11136	3631	24713	11395	3126	4364	16100	3483	11267	25956	2162	5802	12392		6485	9669		4017
UPF0160 protein MYG1_ mitochondrial OS=Homo sapiens OX=9606 GN=C12orf10 PE=1 SV=2	6.23	42791.5	2820.64	Q9HB07	15	39.63	0	MYG1_HUMAN	15733	14696.3	15675.7	16227.7	15938.3	14586	14587	14402.7	15618.3	18807	16921.3	18600.7	13680	13460	26391	10220	9340.67	13657	8017.67	7398.33	8668.67	19807.3	17739	18132.7	16391.7	14870.7	16270	15467.3	14950.7	15447.3	13800.7	13478	13285.7	13562.3	12872	12515	10391.3	9951	9884.67	5437.33	4509
Tubulin beta-1 chain OS=Homo sapiens OX=9606 GN=TUBB1 PE=1 SV=1	4.89	50897.3	2813.36	Q9H4B7	12	29.27	0	TBB1_HUMAN	5019.18	4567.66	4249.44	5942.96	5822.37	5814.51	3868.29	6946.3	5949.65	5990.86	8866.54	7755.79	4251.54	5862.43	5450.83	8619.48	7575.38	9277.33	2923.37	2683.25	3764.29	4014.03	3917.3	4181.58	4815.92	3890.68	4241.5	4336.22	4644.41	4943.24	5073.11	5546.64	4820.36	5393.66	5375.26	5540.43	3167.58	3757.58	3502.02	2925.68	3202.2
Exportin-5 OS=Homo sapiens OX=9606 GN=XPO5 PE=1 SV=1	5.45	138422	2808	Q9HAV4	33	32.56	0	XPO5_HUMAN				13076.3	14070	14149	14027.3	13859	11916.7	6056.67	4704	4709	2601	2232	2740			3077				14664.7	14452.3	14419.3	12265.3	12169	12368.3	11788.7	10862	12188	4117.67	4275	5143.33	3631.33	3589.67	3769	2623	2658	2573	3051	2657
Programmed cell death protein 6 OS=Homo sapiens OX=9606 GN=PDCD6 PE=1 SV=1	4.97	21925.5	2783.22	O75340	8	45.55	0	PDCD6_HUMAN	13633.5	10212.5	9213.5	19362	18038.3	20021.7	19789.3	19041.7	19681.7	19846.7	18312.7	18558	8728	7283.67	9958.5	13996.5	18354	11983.5	14601	13105.5	15894.5	20238.3	19820.7	20412.7	17739.7	17382.7	17408.7	19076	18497	17579.3	18928	19531.3	18467.7	10127	9968.67	9866	4570	4324	4448	8831.67	7979.33
4-trimethylaminobutyraldehyde dehydrogenase OS=Homo sapiens OX=9606 GN=ALDH9A1 PE=1 SV=3	5.57	54714.5	2780.71	P49189	13	26.72	0	AL9A1_HUMAN	28847.3	27140.7	28415.7	33676.7	33594.7	28441.7	36092	32155.3	29245	32980.3	34567.7	32012	30781.3	27241.7	25368	15587.3	14951	13740.7	7130	7773.67	7434	21299	20507	21040.7	22325.3	22338.7	22119	22629	23163.7	22842.3	28029.7	30196.7	28589.3	22408	22285.7	21786.3	11120	12855.3	11281.3	10316	10511.3
40S ribosomal protein S5 OS=Homo sapiens OX=9606 GN=RPS5 PE=1 SV=4	10.29	23047.5	2779.63	P46782	8	37.25	0	RS5_HUMAN	8499	6773	6075	17788.7	14783.7	3704.67	12752.7	10410.7	4903	9080.33	9112.33	2167	6694	5867		6174.5	4813.67	8570	10306.7	5898	7473	5576.5	5571	5625.67	4955.5	4447	4660.5	4292	3769	4032	4286.5		5426	7221	7125	6285	9063	8637	8123	9440	8787
60S ribosomal protein L35 OS=Homo sapiens OX=9606 GN=RPL35 PE=1 SV=2	11.68	14551.5	2778.24	P42766	3	21.14	0	RL35_HUMAN	7741	10902	10767	20953	24516	19790.5	17627.5	17980.5	15643.5	13110	12335	12226.5	10159	11323	8981	5496.5	5298.5	5046	12980.5	10931.7	10420.7	11993.5	12892	12190.5	15294.7	18423	15794	15661	14332	14165.3	13922.5	13384	15263.5	9144	13718	8443	5660	5610	5024	13287	9539.5
Keratin_ type II cytoskeletal 4 OS=Homo sapiens OX=9606 GN=KRT4 PE=1 SV=4	6.24	57684.5	2771.33	P19013	10	20.04	0	K2C4_HUMAN	4371.5	3410.5	3549	5958	5313.67	2405.33	6566	6768	4253.67	4242	4408	3256	3621.5	4152.5	3497.67	3760	3138	2823					2900.33	2130.51	7491.5		3762	8716	8733	8881	4312.5	5469		2667						4611	5143
L-aminoadipate-semialdehyde dehydrogenase-phosphopantetheinyl transferase OS=Homo sapiens OX=9606 GN=AASDHPPT PE=1 SV=2	6.4	36004.1	2771.05	Q9NRN7	15	40.78	0	ADPPT_HUMAN	5934	27485	29030	15006	15620.3	16819	13301	15711.7	14380.7	15932	20664.7	14561.7	5847.5	16477	8760.33	11102		3268.5		29359	2729.5	10433.7	10578	10033.7	10345.3	9452	9204	10029.7	9799.33	10352.7	12462	9341	9953.33	6219.67	4144	3741.33	3741				3271
Mitogen-activated protein kinase 1 OS=Homo sapiens OX=9606 GN=MAPK1 PE=1 SV=3	6.57	41789	2763.13	P28482	18	51.39	0	MK01_HUMAN	15461.7	15428.7	14798.7	11556.1	10556	12252	12435.3	12203.8	13012	16234.3	16525.3	15466.7	16208.3	15750	14327.7	30029	17225.5	13521	36870	36682	14700	16941	16701.7	16318.7	14796.3	14681.7	14720	15455	15480.3	14786	19851	19464.3	19349	18306.3	17482	16804.7	14794.5	25538	13177	12670	16911
Ribosome biogenesis protein WDR12 OS=Homo sapiens OX=9606 GN=WDR12 PE=1 SV=2	5.51	48221.3	2761.73	Q9GZL7	12	39.48	0	WDR12_HUMAN	17749	17694	18033.3	12967	12928.3	11645.7	13719	15245.7	13344.3	18649.7	18926	17921	18376.3	19398	19437.3	14430	13842	13942.3	12923	12902.7	12320.7	10767.7	10363.7	10818	11341	11358.3	11626	12136	11800	12575.7	16971.3	17704	17525.7	16471.3	16661.3	16781.7	21750.3	21468.3	20908.3	11153.7	10783.7
Protein transport protein Sec23A OS=Homo sapiens OX=9606 GN=SEC23A PE=1 SV=2	6.68	87073.4	2759.88	Q15436	20	36.08	0	SC23A_HUMAN				17024.7	16635.3	16293	15874	14381.3	14159.7	7315	7685.67	7623.67	3260	3671	1744							15740	15148.7	14610.7	12738.3	12050	12419.7	12122.3	11744	12156.3	4300.33	4556.33	4267	2119.67	2075	2202	2900	3269	3087	2474
Selenide_ water dikinase 1 OS=Homo sapiens OX=9606 GN=SEPHS1 PE=1 SV=2	5.59	43424	2751.75	P49903	11	47.7	0	SPS1_HUMAN	19282.7	18954	20293	17433.7	18274.3	19221.7	16764.7	17806.7	17990	21806	23156	22016.3	22626.7	22019	21915.3	26617	30271.7	25558	30509	32397.3	27665.3	15246.3	15223.7	14017.3	15101	12571.7	14061.7	14062.3	14472	12601	15964.7	15244.3	13425	12678.7	11569.3	10391	21111.3	21122	19862.3	19141	18585.3
Inositol-3-phosphate synthase 1 OS=Homo sapiens OX=9606 GN=ISYNA1 PE=1 SV=1	5.41	61581.2	2749.62	Q9NPH2	17	35.3	0	INO1_HUMAN	37828.3	41590	38141.7	22732	21822	20808.3	23521.7	24560	21875.7	34342.3	32323	29918.7	42672.3	45016.3	42416.3	55217.3	48005.7	49124.3	47547.7	49116	47003.7	22406	24161.7	24484	21821.7	20801.3	22929.7	24265.3	24020.3	24464	34811.3	33773.3	33281	41635	42999.7	40497	67128.3	61572	69444.7	56581.3	55652.3
Acylamino-acid-releasing enzyme OS=Homo sapiens OX=9606 GN=APEH PE=1 SV=4	5.15	82194.1	2746.09	P13798	22	31.69	0	ACPH_HUMAN	26184	25843	26396.7	17649.7	17420	22873.3	20134.3	18737.3	24371.3	27357.7	26586.7	26580	27398.3	25773.3	29807.3	25968.7	24251.3	28148.7	23993.3	22271.3	23873.7	15875.3	14652.7	14133	28224.3	13246	28510.7	30167.7	32565	34813	31903.3	18824.7	33277.3	19639.3	72622.7	18841.7	26955.7	26042.3	25851	15019	14156
DnaJ homolog subfamily C member 8 OS=Homo sapiens OX=9606 GN=DNAJC8 PE=1 SV=2	9.71	29841.7	2744.38	O75937	13	55.73	0	DNJC8_HUMAN	10114.3	8698.33	9192.33	17325.3	16678.3	15841	17113	15977	15569.7	11815	12632.7	11232.7	16221.3	15736	16286.7	11976.7	11341.7	8878	15182	15056	12244	20074.3	17351.7	16527	21126.7	19389.7	17970.3	21469	18088	18550.7	15666.7	14947	14481	13513	13267.3	12025.3	14333.3	14466.3	13992.7	16726.3	15674.7
Ras-related protein Rab-33B OS=Homo sapiens OX=9606 GN=RAB33B PE=1 SV=1	6.82	26059.7	2743.66	Q9H082	1	4.37	0	RB33B_HUMAN				3768	4086	3593	5306	4453				1521										2205	2445	2446	1470	1674			2000
Ubiquitin-conjugating enzyme E2 E3 OS=Homo sapiens OX=9606 GN=UBE2E3 PE=1 SV=1	6.99	23197.8	2742.38	Q969T4	2	10.14	0	UB2E3_HUMAN	1451.33			5893.65	6055.51	8005.25	7368	7042.5	9381.5	6184	5519	7662		4042	3918.5			1238.33			1496	10396.8	10318.4	10462	11824.5	11084	11741	12513.5	12150.5	11705	7892	7464.5	7953	6204	6157	4783	2071	2246.33	1217.33	3063.67
Programmed cell death protein 4 OS=Homo sapiens OX=9606 GN=PDCD4 PE=1 SV=2	4.89	52134.5	2740.15	Q53EL6	16	43.92	0	PDCD4_HUMAN	6624.33	5435.33	5841.5	20348.7	19165.7	20739	16354.7	16144	16646.3	9818.67	9163	8829.33	4393.67	6592	6912.33	3365	3294	3741	3916.5	4105	4327.67	8196.33	8647.33	9978.33	8614.33	9601	9433.33	8589.67	7996.33	8974.67	4796	6308.5	4817	5069	5380.5	4804				3022	3376
PRKC apoptosis WT1 regulator protein OS=Homo sapiens OX=9606 GN=PAWR PE=1 SV=1	5.15	36681.6	2730.32	Q96IZ0	12	33.53	0	PAWR_HUMAN	9783.67	9932	9561.67	2994	4267.33	7335.67	6014	3819.67	9810.67	8698.33	7731	9156.33	10711.7	11149	12101	13696	13456	14821.3	16723.3	16162.3	19885	13238.7	12061.3	11704.7	13218.3	13060.7	14406	14054.7	15775	14985.7	17102	16007.7	15422	18482.3	19752.3	18615.3	24709.3	22441.7	18144.3	24699.7	23849
Cyclin-dependent kinase 4 OS=Homo sapiens OX=9606 GN=CDK4 PE=1 SV=2	6.59	33958	2720.29	P11802	8	37.95	0	CDK4_HUMAN		5614	4716	3652.67	3586.67	5437	4215	3565.67	4462	6144.67	8819.67	5638	5549	5671	3277.33							13620.7	13581.7	13421	11113.3	8755.67	11244.7	12785.3	9757.33	12045.7	10915	10005	10311.7	7440	7755.33	7508.67
Xaa-Pro aminopeptidase 1 OS=Homo sapiens OX=9606 GN=XPNPEP1 PE=1 SV=3	5.32	70602.3	2717.08	Q9NQW7	25	44.78	0	XPP1_HUMAN	4453.5	3576	5447	21844.3	20502.3	21642	21450.7	18168.3	17312	13977.3	43945.3	50802.3	2568	3029	2790							21896.3	21526.7	20025.7	20645	63147	18613.3	20252.3	66089.3	19542.7	10140.7	9872.67	9267.33	6465.67	5828	3824.67
Cullin-4B OS=Homo sapiens OX=9606 GN=CUL4B PE=1 SV=4	7.08	104552	2714.48	Q13620	51	53.12	0	CUL4B_HUMAN	9959.33	10733.7	10674.7	13643.7	14628	15493.3	20176.3	19929.7	15520	18825.7	16661	20735	11727	11803.3	13037	2630.07	5445.43	4569.79	6006.06	10952.5	2784.79	20799	19393.7	17991.7	17518.7	15895.3	16608	17347	16327.3	14986.7	16345.7	15722.3	16503.3	11459	11730.7	11433	1719.18	2340.79	3005	3365.58	2417.04
Septin-6 OS=Homo sapiens OX=9606 GN=SEPTIN6 PE=1 SV=4	6.26	50115.9	2707.53	Q14141	14	40.55	0	SEPT6_HUMAN	17867.5	18455.1	18804.2	5564.19	8077.88	5482.86	7321.15	6362.38	8955.07	12663.3	10624.9	13052.3	13860	14300	16488.2	15142.9	15570.3	18464.7	10255.2	11646.7	11460.9	10280.7	10241.9	11060.2	6972.36	10807.6	8143.37	8048.73	5467.54	7886.86	12492.9	13514.8	17448.9	19417.6	20071.1	26182.9	15723.7	17759.3	22496.6
Coatomer subunit beta OS=Homo sapiens OX=9606 GN=COPB1 PE=1 SV=3	5.66	108283	2699.36	P53618	34	43.02	0	COPB_HUMAN	7860	7156	12272	15969.3	17465.3	17580.7	17882.3	19672.7	19450.3	19574.3	17779	18160.3	7881.67	8498.33	8154	2981	3010.5	3243.33	7412.67	7916.33	7941.33	15200.7	14436	15167.3	15131.3	14752	13705	15568.7	14567	13591.7	12564.3	11744	11637.3	7678.33	7227.33	7494.67	6141.33	6014.33	5854.67	8215.33	8212.67
Casein kinase II subunit beta OS=Homo sapiens OX=9606 GN=CSNK2B PE=1 SV=1	5.22	25284.7	2692.7	P67870	5	25.12	0	CSK2B_HUMAN	7723	11642	8006.5	27203.5	23725	20451	20436	22364.5	18722.3	19488.5	20641.5	16780.3	4258	3923.5	6055			2762	2820		3690	19281.3	17603.7	16529.7	17607	13959.3	16212.7	15868.7	14636.7	12553	11517.3	11596.3	11315.3	5818.33	5827.67	5929.67
Serine hydroxymethyltransferase_ cytosolic OS=Homo sapiens OX=9606 GN=SHMT1 PE=1 SV=1	7.55	53653	2689.52	P34896	21	44.72	0	GLYC_HUMAN	11821	11292.7	11256.3	7468	8337	7202.33	7615.67	7463	8077.33	9592.44	9507.33	10900.7	11664.3	10404	12156	16954.3	17042	17689.7	7355	5949.67	7813	6587.33	7667.33	7782.67	6846.35	7439.67	7496.67	8013.33	8029.33	7971	11584	10635	10995.3	12443.3	11524	11253.7	10782.3	10450	10166.7	5142.67	4709
Serine/arginine-rich splicing factor 6 OS=Homo sapiens OX=9606 GN=SRSF6 PE=1 SV=2	11.92	39700.9	2685.72	Q13247	14	29.94	0	SRSF6_HUMAN	15039.7	15459	12635.4	12450	12215.8	13072.6	9057.56	12076.7	12773.4	10755.9	8409.6	14127.7	9976.06	9415.55	10269.8	10125.7	9337.22	10648.1	10827	10783.3	14164.8	16040.4	14440.7	20121	20166	26251.7	25862	15666.5	15542.7	15499.2	12474.3	12847	12828.4	8492.09	9909.31	9820.31	14514.9	14199.2	14584.2	22419	22847
Heterogeneous nuclear ribonucleoprotein H3 OS=Homo sapiens OX=9606 GN=HNRNPH3 PE=1 SV=2	6.44	36983.6	2685.14	P31942	10	43.06	0	HNRH3_HUMAN	6401	6074	4758	10678.7	9254.67	10976.7	4191	3819.67	5633	4512	3891	4532.33	3000	2464	3064.33	47249	45406.5	33040	3627	4101	3656	14022	14218.7	12008.7	16634.7	15414	16133	10604.3	10671.3	10475.3	6420.33	5987	6623	7199.67	7145.33	7011	4349	4300	4246.33	5246	5245.67
Leucine-rich repeat-containing protein 47 OS=Homo sapiens OX=9606 GN=LRRC47 PE=1 SV=1	8.28	64043.3	2684.03	Q8N1G4	21	39.11	0	LRC47_HUMAN	13318	14641.7	13484.3	13037	13243.7	17762	13232.3	12466.3	19690.3	15662.7	16101	17805.3	15296.3	14919.3	15945	19495	13622	10565.3	8143	5883	4405.67	16835.3	16386.3	16543.3	16590	18252	18316.7	16628.3	17561.3	17812.7	17767	19342.7	18799.7	8593	9556	9936	10998.5	20598	11827	9122	9383
S-methyl-5'-thioadenosine phosphorylase OS=Homo sapiens OX=9606 GN=MTAP PE=1 SV=2	6.84	31749.3	2681.64	Q13126	12	53	0	MTAP_HUMAN	9371	13241	11416.3	7849.33	7704.33	7545.67	6657.67	8209.67	8091.67	10773.3	10568.7	10195	11978.3	12097.7	12802.3	15450	15059	15579.7	18751.3	19936	19529.3	8314.33	9030.33	8941.67	6877	7325	7060.33	7030	7199	6689	8896.67	9323	9194.33	11782.7	11833.3	11408	15205	15308	15094.3	18519.7	17861.3
Geminin OS=Homo sapiens OX=9606 GN=GMNN PE=1 SV=1	4.74	23679.2	2675.32	O75496	11	53.59	0	GEMI_HUMAN	9329.67	8626	8360.33	5124.33	5317.33	5764.67	5596	5634.67	7053	7295	7017	7344	9229	8444.67	9595.33	8908.33	10557.7	11443.3	14299	13736.7	17398.7	6508.67	6362	7654	6720.33	11738	7851	7070	7715.67	8287	11911	11941.7	16886	13283.7	14583.7	17232.7	20009.7	19766	18680.3	24153.7	23795
Splicing factor 3B subunit 6 OS=Homo sapiens OX=9606 GN=SF3B6 PE=1 SV=1	9.76	14699	2668.93	Q9Y3B4	2	20.8	0	SF3B6_HUMAN				7915	7513.5	8046.5	5931.5	7018	6368.5	5418.5	5391.5	5448.5	1964		1891.5							6437.5	6552.5	5613	8163.5	6737	7559	7495.5	7029	6429	4434	3929	2616
60S ribosomal protein L13a OS=Homo sapiens OX=9606 GN=RPL13A PE=1 SV=2	11.56	23634.3	2663.35	P40429	11	41.87	0	RL13A_HUMAN	18731	18332	17973	19228.7	20061	19853.3	15612.3	16390.3	17726	13347	12855.3	11763.7	18871	19759	8363.67	10882	9878	10033	25548	26886	13629.7	10502	11948	12183.7	13540.7	12231.3	13044.3	10638.7	11060	9882.33	10793.7	9880.33	10681	7833	7920.67	8366.33	7928	7034	6869	10385	9189
Dual specificity protein phosphatase 3 OS=Homo sapiens OX=9606 GN=DUSP3 PE=1 SV=1	7.83	20706.4	2662.61	P51452	6	40	0	DUS3_HUMAN	5299	5024	6099	11197.7	11122.3	10826	8809	9480.33	9236.33	7579.67	6862.67	8050.67	5956.33	5874.33	5669.33	9435.5	7484.33	8494	4069	3794	4614.5	9195	9819.33	10262.7	10622	10791	11665.7	10284.3	10696	10277	6005	6513	5964.33	5970.67	5780.33	6383.67	4354	4819.5	3703.33	2976	3582
Adenosylhomocysteinase 3 OS=Homo sapiens OX=9606 GN=AHCYL2 PE=1 SV=1	7.1	67747.7	2660.8	Q96HN2	12	16.86	0	SAHH3_HUMAN	8041.83	9541.83	9163	14147.2	15181.3	12363.2	8565.45	9146.67	6098.44	9192.53	9771.33	8050.17	5274.83	7190.82	6217.32	3674.35	3313.54	3685.42				9142.3	12757.1	12579.3	11247.4	9726.62	8819.9	9358.35	8848.01	8466.93	11867.3	12240.3	15597.1	15066.1	15325.5	16568.8	12059.7	12245.1	12296.7	4729.17	4709
S-adenosylhomocysteine hydrolase-like protein 1 OS=Homo sapiens OX=9606 GN=AHCYL1 PE=1 SV=2	6.51	60035.1	2660.8	O43865	19	34.91	0	SAHH2_HUMAN	8041.83	9541.83	9163	9694.76	10403.4	8472.17	11442.6	12219	8146.89	11702.8	12439.7	10248.5	4684.48	6132.51	5331.68	9727.31	9619.21	11750.2	7318.33	7982.33	8049	8551.24	11520.9	11360.3	13152	11373.7	10313.4	10314.7	9597.71	9256.93	11182.7	11302.4	14370.6	9657.87	9824.15	10621.2	11794.3	11975.6	12026	4729.17	4709
ATP-dependent 6-phosphofructokinase_ muscle type OS=Homo sapiens OX=9606 GN=PFKM PE=1 SV=2	7.9	86038.1	2660.47	P08237	28	35.51	0	PFKAM_HUMAN	27861	26000.3	25915.7	19147.7	20627.3	18585.7	20373.7	21147.3	19829.3	27067	27266.7	23344.7	30325.7	30838.7	25383.7	26291.3	25796.3	23836	19169.7	18472.7	16620.3	17201.3	17471	18604.3	15427	16546	15748	15996.7	16442.7	16165.3	21442.3	21175	21093	23096	21385	21579.7	22789	21584.7	20182	15005.3	13827.7
Alcohol dehydrogenase class-3 OS=Homo sapiens OX=9606 GN=ADH5 PE=1 SV=4	7.33	40579.7	2656.9	P11766	8	23.53	0	ADHX_HUMAN	24586	30068.3	27895.7	20934.3	21645	21233	25647.3	27286	21757.7	31935	30824	27939.7	37752.3	37222.3	33171.3	17635	17356.7	17219	10751	10967	10145.7	18752.7	17995.3	18147.7	16940.7	16211.3	16905.7	17673	18320	17239.7	25711.7	24921.7	25646.7	30403.7	31773.3	29461.3	21170.7	21616.3	20982.7	11030.7	11461
Ras-related protein Rab-39A OS=Homo sapiens OX=9606 GN=RAB39A PE=1 SV=2	7.59	25405.9	2655.93	Q14964	1	5.99	0	RB39A_HUMAN				5438	3524	9190	5635	4611	9241	2179		2257										8984	9206	8130	8554	7575	8564	8140	7822	6711
Splicing factor U2AF 65 kDa subunit OS=Homo sapiens OX=9606 GN=U2AF2 PE=1 SV=4	9.47	53843.3	2648.14	P26368	10	33.68	0	U2AF2_HUMAN	11242	11170.7	10207.7	25666	26875	28927	23893	25875	29773.7	20542.7	20185	20952	11759	10988	12241.7	8117	7734	8744	4404.5	6082.67	6761	33111	30076.7	32026.3	33513.7	32335	34606	27362.7	28631.3	27478.3	17326	17435	17672.3	13103.7	14309	13991.7	9634	7505	8373	7367	8181.5
26S proteasome non-ATPase regulatory subunit 9 OS=Homo sapiens OX=9606 GN=PSMD9 PE=1 SV=3	6.54	24852.9	2643.63	O00233	5	26.01	0	PSMD9_HUMAN	14854	12963.3	13311.3	9185.33	8658	10436	8843.33	8294.67	9661.33	10379.7	10866	13002.7	14715	13860	17742.7	14046.7	13787.7	14932.7	17050.7	16894	18072.3	9272	8725.67	9192.33	10227	10470.3	10378	10088.3	9599.33	10024.7	12945.7	13688.7	14082.3	13432.3	14085.3	14187	18669.3	19505.3	18244.3	22174.3	23208.7
60S ribosomal protein L21 OS=Homo sapiens OX=9606 GN=RPL21 PE=1 SV=2	11.16	18621.9	2642.94	P46778	4	31.25	0	RL21_HUMAN	3339	4736	5006	6738.3	6883.01	6508.5	5130.58	4717.76	4478	3900.7	5237.45	4321	3214	3390		3144	2915		6811	5153.5	3801	5554	3687.5	5115	4950.5	6224	4685	3323.5	4085	4038	3655		4102
Phenylalanine--tRNA ligase alpha subunit OS=Homo sapiens OX=9606 GN=FARSA PE=1 SV=3	7.74	57620.8	2640.91	Q9Y285	16	35.83	0	SYFA_HUMAN	5905	3926		11066	12525	11060.3	8646.33	9742.33	9022.33	2647	3521.67	3368	4946	4016	3290	9863	8466	8672	11442	8947	9194	17525.7	17731.3	17721.7	17794	17639	17835	16344.7	16518.7	16364.7	2726.67	4198	4040.33	2964.5	3072.5	2877.5					2811
Glucose-6-phosphate 1-dehydrogenase OS=Homo sapiens OX=9606 GN=G6PD PE=1 SV=4	6.43	59713.1	2636.24	P11413	27	54.37	0	G6PD_HUMAN	8510	6271	5810.33	14220.3	14364.3	18730	15158.3	15332.7	18163	14574.7	13778.7	16763.3	7206	6818.33	7796.67	5576.67	5624.67	7021	6657.33	6690.67	7350	18133	18087.3	17820	16989.3	16016	17102.7	18536.3	17330.3	17307	14238	14187.7	13715.3	9178	9231	9107	5828	5980	6062.67	11469.7	11382.7
Immunoglobulin kappa constant OS=Homo sapiens OX=9606 GN=IGKC PE=1 SV=2	6.13	11936.1	2634.18	P01834	2	31.78	0	IGKC_HUMAN																						1990	2358	2589	4928	9348	8752	18351.5	17902	15851.5	5030	4847	4497	5886	5982	5823				3182	4482
Ubiquitin-conjugating enzyme E2 E1 OS=Homo sapiens OX=9606 GN=UBE2E1 PE=1 SV=1	8.67	21689.3	2633.24	P51965	2	16.06	0	UB2E1_HUMAN	1451.33																	1238.33			1496																2071	2246.33	1217.33	3063.67
Ubiquitin-conjugating enzyme E2 E2 OS=Homo sapiens OX=9606 GN=UBE2E2 PE=1 SV=1	7.72	22540.3	2633.24	Q96LR5	3	11.44	0	UB2E2_HUMAN	1451.33			1479.35	1941.97	2300.5												1238.33			1496	1532.74	1896.27	1908.92													2071	2246.33	1217.33	3063.67
Copper transport protein ATOX1 OS=Homo sapiens OX=9606 GN=ATOX1 PE=1 SV=1	7.09	7572.73	2620.22	O00244	2	23.53	0	ATOX1_HUMAN	13386	11919	10803	5857	5695	5452	7899	7218	7646	7566	7489	8504	10353	10624	12427	15561	13299	10057.5	14908	14326	10739	7472	7828	7953	5050.5	9528	9178	7072	7715	7978	10548	11127	8570	13863	9027.5	14297	20231	19693	21260	21091.5	22112
Flap endonuclease 1 OS=Homo sapiens OX=9606 GN=FEN1 PE=1 SV=1	8.89	42935.2	2618.79	P39748	16	44.47	0	FEN1_HUMAN	4127	4281		19050.3	17911.7	20644	15829.3	14621.3	17138.7	6973	6438.67	6397.33	7166.67	10778.3	3000.33	6421	7346	2637	3241.5		3178.67	19695.7	18816	19920.3	16257.3	17782.3	16747	13298	13784	12858.7	3114.5	2984	3557.5	2824.5	2439	2370.5			2334	6826.33	6432.5
Alpha-actinin-3 OS=Homo sapiens OX=9606 GN=ACTN3 PE=1 SV=2	5.22	103983	2611.07	Q08043	19	22.09	0	ACTN3_HUMAN	4079.55	3591.43	3372.94	18672.1	19340.8	27000	32658.9	33367.6	40852	14284	13814.1	19381.8	7889.06	7924.77	12252.3	3976.55	3283.68	8720.83	4439.22	4168.44	12733.4	17761.3	11622.2	17844	12539.2	21266	18636.1	19211.5	20493.9	21151.9	10664.9	11545	11941.8	9132.67	8213.59	10815	13001	14921	14889.7	13577.7	13899
NEDD8-activating enzyme E1 regulatory subunit OS=Homo sapiens OX=9606 GN=NAE1 PE=1 SV=1	5.09	60702.7	2606.7	Q13564	17	41.57	0	ULA1_HUMAN	3918.5	3783.33	4113.5	15791.7	15869.7	16102	16379	15897	17616.7	14591.7	12705.7	14672.7	6210	6227	6126.67	3674.33	3125	4608.33	4000.67	3943.33	5498.67	13535.3	13450	13160.3	13873.7	12830.3	13701.7	14104.7	14077	12508.7	7612.67	7537	7006	5114.33	5121	5018.33	3350.67	3266	3106	3373.67	2901
COP9 signalosome complex subunit 8 OS=Homo sapiens OX=9606 GN=COPS8 PE=1 SV=1	5.08	23282.7	2599.78	Q99627	9	44.98	0	CSN8_HUMAN	10250.5	9930	9313	8895.33	9247.67	9071	8917.33	9156.67	10709.3	10213.3	10651	12349.7	6369.33	7150.33	8151	12108	10942.3	10370.3	11582.5	10244.3	11196.7	11639	11875.3	11387.7	12091.3	9361.67	10967	12761.3	12559.7	12172.3	12569.3	12656.7	10155.3	11295.7	10315.3	8138.67	12753.5	7852	8373	7125	8413
Protein CutA OS=Homo sapiens OX=9606 GN=CUTA PE=1 SV=2	5.26	19230.4	2598.57	O60888	4	34.08	0	CUTA_HUMAN	40616	27400	50472	11618	9232.33	11803	14283.3	12494	14740	15746.3	17304	16280.3	19947.5	16183.5	14734.3	38998	34850	42422.5	44283	42061	37714.5	17890	16299	15603.7	14514.7	15060.7	16531.3	24274.5	15938	15176.3	53369	31449	31514	30736	50828	52080	9301	7965	8609.5	8800	7543
Ubiquilin-1 OS=Homo sapiens OX=9606 GN=UBQLN1 PE=1 SV=2	4.85	62519.1	2588.59	Q9UMX0	13	30.9	0	UBQL1_HUMAN	14033.4	17702.6	16842.7	9319.96	8564.13	11010.9	8504.98	8307.21	8401.07	11748.1	11286.8	12910.6	12387	12676.6	15648.3	18383.4	17947.3	21366.1	19017.7	18442.6	22846.2	3506.66	3526.4	3474.57	9369.34	7147.47	6563.85	9626.73	8682.52	8181.6	10974	10398.4	10015.4	11108.3	10744.9	9768.33
Tubulin--tyrosine ligase-like protein 12 OS=Homo sapiens OX=9606 GN=TTLL12 PE=1 SV=2	5.22	75202.1	2586.78	Q14166	19	38.2	0	TTL12_HUMAN			3930	24388	24624	23926	12233.3	11666	11727.3	4097.67	3780.67	3218.67		3547	2102	3801	3642	3919	5468	4635	5771	32845.3	31229.3	31612.3	26924.3	25584.3	27314.3	19777.7	19884.3	19123.7	3466	3524.67	3129	4429	4632	4021	2788		2744	3456.5	3097.33
Caldesmon OS=Homo sapiens OX=9606 GN=CALD1 PE=1 SV=3	5.44	93288.2	2583	Q05682	31	36.7	0	CALD1_HUMAN	12480.3	12232.7	11424.7	12444.3	11435.7	15288.7	12109	11876.3	13640.3	12963.7	11971.3	17260	15729.7	15765.7	21375.3	21278	20547.7	20147.3	24683.3	23932.7	28332.7	15933.3	16087.3	16556.3	14525.7	12134.3	14267.7	15560.3	15557.7	15245.3	16391.3	16273.7	14332	23323.3	25112.7	23400.3	30096.7	28365.7	24904	34111	33713.7
60S ribosomal protein L27a OS=Homo sapiens OX=9606 GN=RPL27A PE=1 SV=2	11.62	16675.5	2577.47	P46776	4	26.35	0	RL27A_HUMAN	15605.7	12514	13250	28999.3	25630.3	28811.7	24027.3	22340.7	23513.3	17064.3	15458	19381	11909	11037.3	10406.3	9862.33	9213.33	9503.67	17697.7	17371.7	17151	16680.7	18610.3	19273.3	19076.3	21515.7	19384	15600	16529.7	16828.7	19737.7	19710.7	19355.3	16064.7	15768	15456	6760.33	8482	7789.5	18672.3	17204.3
Hemoglobin subunit delta OS=Homo sapiens OX=9606 GN=HBD PE=1 SV=2	8.23	16169.6	2573.13	P02042	4	31.97	0	HBD_HUMAN	15880	9548.5	10304.5	13268	7784.5	11469	6393.5		6430	7969		5890	4160		4784	10278	9691.5	11009.5	13972.5	12160	13443.5				4068.59	2519.24	2570.95	3238.78	3063.26	4491.95		5013.95	4992.22	8149	10469	8843	9517	9156	21991	18201.3	16610
2-iminobutanoate/2-iminopropanoate deaminase OS=Homo sapiens OX=9606 GN=RIDA PE=1 SV=1	9.13	14550.7	2567.77	P52758	4	35.04	0	RIDA_HUMAN	44486.5	48258.5	45927	15868	16331.7	18044	18841.5	14088	17164.7	29368.5	21475.7	24113.7	18408.7	19353.3	21398.7	33074.3	33254.3	37631.7	34105.3	34564	41803.3	59156	33267	64495	33756.5	33314	34139	39688	38308.5	74184	43332.5	46826	47946.5	41769.7	62849.5	61503.5	57847	39687	42833.3	47410.3	48217
THO complex subunit 4 OS=Homo sapiens OX=9606 GN=ALYREF PE=1 SV=3	11.68	26887.9	2567.25	Q86V81	8	40.86	0	THOC4_HUMAN	4433	6497.33	14154	23124	21748.3	27640.3	25300.3	24514.3	24752.3	20734.3	19398.7	22063.7	18451.3	11320.7	17034.7	6786.33	12864.3	7506.67	12636.7	16665.3	12569.3	21310.7	20710	20346.3	26553	23457.3	25153.7	26070	25455	25254.3	26188	22833	21698	19429.3	17868.7	9512.67	19229.3	17898.7	9137.5	15249.7	15093.3
26S proteasome non-ATPase regulatory subunit 8 OS=Homo sapiens OX=9606 GN=PSMD8 PE=1 SV=2	10.17	39897.1	2564	P48556	14	32.57	0	PSMD8_HUMAN	9640.67	9136	9075.33	24129.7	24945.7	21146	23644	23664.3	21110.3	15875	15849.7	16092.7	8203	7896.33	8650.67	4239.33	4536	5007.33	3885.67	4142	4682.33	20798.7	24256.7	23145.7	19892.7	20135	19481.7	18539	18130	17971.3	12408.3	12140.3	12608.3	10843	10923	10912.3	20644.3	20191.7	21226.3	5209.67	4699.33
Craniofacial development protein 1 OS=Homo sapiens OX=9606 GN=CFDP1 PE=1 SV=1	4.57	33592.9	2552.97	Q9UEE9	13	46.15	0	CFDP1_HUMAN	9585	8138.67	7138.67	7089.33	6195.33	12569.7	6454.67	5597	13287.3	6411.33	6618	13133	12563	12845.7	14264.3	12121.3	12804.7	14860.7	14862.7	14645.3	18614	14672.3	14042	14302	13171.7	16147.7	13923.7	13421	14351.3	13972	12912.3	14046.3	13260	14806	15119.7	15466.3	18523	18500	17740.3	22146.3	20549
Translin-associated protein X OS=Homo sapiens OX=9606 GN=TSNAX PE=1 SV=1	6.13	33226.6	2550	Q99598	14	56.55	0	TSNAX_HUMAN	24007.7	25046.3	22011	28439	28638.7	27507.3	26577.3	27433.7	26131.7	31902	30002.7	31274.3	27222	22751	24548.7	19710.7	17580.7	20239.3	12739	12053.3	12598.3	35677.7	34260.3	34020.7	28566.7	21152.3	26785.3	29922	29211	26328.7	29428.3	28845.7	28038	34535	33126	28650.7	15819	15127.7	13491	10532	10588
Hydroxyacyl-coenzyme A dehydrogenase_ mitochondrial OS=Homo sapiens OX=9606 GN=HADH PE=1 SV=3	9.44	34350.6	2548.6	Q16836	12	53.82	0	HCDH_HUMAN	3935.5			19199	20304.7	20847	19410.7	18941.7	20045.3	22525	23019	20789	10525.3	10210	4285.33	2858	3030	5409	4275	3246	5633	17805.7	16934.3	17274.3	17368.7	15076.7	16000.7	16570.3	15375.7	14758.7	12683.7	13382.3	13045.3	6155.67	6211	6174.67	5666	5404	6252	7889	8032
Glutathione S-transferase Mu 3 OS=Homo sapiens OX=9606 GN=GSTM3 PE=1 SV=3	5.22	27015.9	2548.11	P21266	9	38.67	0	GSTM3_HUMAN				11815	13018.7	13685.7	6799.33	7028	7514.33	5516	5131	5590.33	6123	5248	3655.5		2719	3411				12513	12664	12555	11116	9827	10535.3	7578.33	7838.33	7033.67	2260.5	2553	2434.33	2068	3012	1794				7608	6420
Apoptosis inhibitor 5 OS=Homo sapiens OX=9606 GN=API5 PE=1 SV=3	7.16	59346.8	2546.09	Q9BZZ5	19	30.34	0	API5_HUMAN	14730	15559.7	14347	24497.7	26592.7	25429	26042	28213.3	28534.7	40105	36193	37002	17189.3	17349.7	16377.3	5339	6323.67	5792	7644.67	7466.33	7355	20363.3	20156.7	20028	18639	17730.7	18700	18381.7	17484.7	17827	24577	23682.3	21871.7	9707	10063.3	9712.33	4688.33	5096	4150	6454.67	4880.5
Pre-mRNA-splicing factor ATP-dependent RNA helicase DHX15 OS=Homo sapiens OX=9606 GN=DHX15 PE=1 SV=2	7.15	91731.4	2543.75	O43143	32	40.5	0	DHX15_HUMAN	7630.67	8576.67	7196.67	22167	21763.3	23435	25238	25936.3	28582.3	26573.7	24110.3	22278.3	9197.33	9110.33	8817.33	3547	4014.5	5968.67	2963	2934.5	4958.33	23538.7	25345.7	24268.7	23513.7	24679.7	24253	25054	25331.3	24600.7	23116	21975.3	22611.3	19697.7	24083.7	30370.7	34973	43828.7	85472.5	11484.7	17799.7
U6 snRNA-associated Sm-like protein LSm1 OS=Homo sapiens OX=9606 GN=LSM1 PE=1 SV=1	4.93	15179.4	2535.51	O15116	8	68.42	0	LSM1_HUMAN	5250.5	5529.67	4010.33	8328	8916	7443.33	5791	7217	7101	8419.67	11153.7	9776.33	11388	14714	12958	7240	12354.7	12558.7	8775.33	14385.7	11529.7	4118	4044	3736	6411.67	6467.67	6952	6121.33	5840.33	5420	5035.67	5474.67	5356.33	5167	5597.67	5618.33	6914.33	6889	7452.67	8153	9697
Cyclin-dependent kinase 4 inhibitor B OS=Homo sapiens OX=9606 GN=CDKN2B PE=1 SV=1	6.12	14778.7	2534.91	P42772	3	20.29	0	CDN2B_HUMAN				610.848	791.391	1029.69	294.449	335.118	1064.47	514.955	504.145	1400.26										1367.74	2070	1944	1559.47	1082.34	841.003	1150.17	1000.44	490.79		1854	847.785
Quinone oxidoreductase OS=Homo sapiens OX=9606 GN=CRYZ PE=1 SV=1	8.69	35377.8	2533.11	Q08257	16	57.45	0	QOR_HUMAN	12975.7	12665.7	12055.3	13940	14282.7	20524.3	13775.7	13684.3	19765	20594.7	20189	27836.7	13898.3	13187.3	16411.7			7724			13127	20615.3	21298	21669	17864.7	22928.3	20113	18488	18757.7	17811	20098.7	21332	22448.3	16875.7	17350.7	16539.7		18791	19860
TAR DNA-binding protein 43 OS=Homo sapiens OX=9606 GN=TARDBP PE=1 SV=1	5.8	45082.1	2527	Q13148	7	22.22	0	TADBP_HUMAN		6041	6588	16715.3	17530.7	19659	10977	11364.7	12161.3	7440.33	6893	8226.33	6048	5408.5	4740.67	3944		4466	5296	7259	2705	19351.7	19296	17512.3	19752	16293.7	17229.3	12298.7	11705	10725.3	3585	3485	3509	2431	2610	2033			6907	2438.5	3121
Charged multivesicular body protein 5 OS=Homo sapiens OX=9606 GN=CHMP5 PE=1 SV=1	4.48	24627.8	2525.21	Q9NZZ3	6	25.57	0	CHMP5_HUMAN	20408	10505	13802.5	8928.33	12148	10140.5	10448	11140	10263	9610.33	8946.67	12943.5	11472.3	11038.7	10751.7	12344.7	15624	13732.3	14795	18274.7	15136.7	10225.5	10507	9776	13305.5	13065	13081.5	13813.5	13303.5	11693	14346	13135.5	26271	29480	30080	32130	49498	50519	48209	51853	49217
Synaptic vesicle membrane protein VAT-1 homolog OS=Homo sapiens OX=9606 GN=VAT1 PE=1 SV=2	5.88	42148.5	2519.91	Q99536	14	48.09	0	VAT1_HUMAN	16332.7	17737.7	17477.3	12934.7	12497.7	14365.7	14289.3	14384	14226.3	15578.7	14739.7	14877	20540	19853.7	19010	19405	17819.3	17141	14505.3	13780.7	13477	12503	11828	11385.7	10624.3	9794	9975	11611.3	11240	10437.3	13997.3	13877.3	14386.7	15502.3	14874.3	14012.7	11391.3	11879.7	9953.33	6274	6216.33
Mannose-6-phosphate isomerase OS=Homo sapiens OX=9606 GN=MPI PE=1 SV=2	5.57	47226.3	2519.32	P34949	13	38.53	0	MPI_HUMAN	4038	3942		19310	19177.7	19203.7	18169.3	17349	14134.3	11566.3	11951.3	9348	2511	2429	3351.33			2555	3498		3223	22380.3	20218.3	20099	17614.7	16317.3	17267	17761.7	16777	15794.3	8975	8561	7742.67	4096.33	4873.5	4915	5146	5296	3791
Keratin_ type I cytoskeletal 20 OS=Homo sapiens OX=9606 GN=KRT20 PE=1 SV=1	5.4	48543.7	2515.44	P35900	17	41.27	0	K1C20_HUMAN	43349.2	44878.8	49644.9	36705.3	36393.7	25432.3	39391.3	36459	15750.7	39114.8	42254.5	13218.6	41546.7	41777.2	10989.4	36119	33132.9	8763.34	28707.1	31591.7	9603.07	12536.3	13516.7	13428	13993.3	14110	14342	14005.7	15209.3	14834.7	13618.8	13699.9	12999.3	9462.33	7026.5	7333.68	9672.51	7599.08	6912.9	12880.8	8907.18
Keratin_ type II cytoskeletal 79 OS=Homo sapiens OX=9606 GN=KRT79 PE=1 SV=2	6.86	58120.8	2513.11	Q5XKE5	13	22.24	0	K2C79_HUMAN	9901	12294.7	11258.3	3493.38	2760.55	7902	3616.62	3319.42	8446.4	4704.26	4744.97	10294.5	6579.17	8866.58	15385.5	9147.96	11626.4	17381.2	8343.74	9985.44	15302.4	10160.4	9906.49	10353.9	10054.7	16921.3	12658.3	11775.8	13117.4	13955.7	15804.8	18380.5	23489.7	15223.2	21337.9	26935.5	20801.4	31594.7	40427.2	21058.6	24496.4
Sulfotransferase 1A3 OS=Homo sapiens OX=9606 GN=SULT1A3 PE=1 SV=1	5.63	34310.3	2511.8	P0DMM9	11	44.41	0	ST1A3_HUMAN	1740	1806.67	1775	5231.79	5263.02	4627.69	4883.46	4730.52	7173.76	2778.91	4005.71	3880.32	1845.8	1812.88	3418.04	6406	4550.5	6518				3994.97	4109.65	4227.95	3208.82	3711.29	2899.02	2507.31	2324.74	2551.3	4890.37	3934.73	5251.89	3725.58	4709.42	3201.51	3664	3883.33	3501	4569.33	4468.33
Protein FAM98B OS=Homo sapiens OX=9606 GN=FAM98B PE=1 SV=2	8.9	45946.5	2504.83	Q52LJ0	8	24.94	0	FA98B_HUMAN	3536			17720	17410	18330	17683.7	18388	16163.3	10548.7	10421	10667	3008	3856	4891.67	3225		4537.67	4052	7101	6264	14710	15359.7	13895.7	14202	13008.3	14719	15047.3	14354.7	14686.3	7444.33	7286	6165.33	5794.33	5203.67	5069.33	5821.5	6044.5	5382	9278.5	8612.5
Malignant T-cell-amplified sequence 1 OS=Homo sapiens OX=9606 GN=MCTS1 PE=1 SV=1	9.18	20783.4	2504.06	Q9ULC4	4	38.12	0	MCTS1_HUMAN				7823.33	6618	7109	7240	6655	6229.67	4319	6204	5260.67	2568	4126.5	3589							4512.5	4090	3149	4716.67	3406	3824.5	4621.5	4089.5	3428
Serine/threonine-protein phosphatase 2A 55 kDa regulatory subunit B alpha isoform OS=Homo sapiens OX=9606 GN=PPP2R2A PE=1 SV=1	5.79	52205.4	2497.9	P63151	15	46.53	0	2ABA_HUMAN	13721	9549.5	8148.5	12857	13026.7	12520.7	11781.8	12782	7219.86	17182.5	16603.8	11759.5	8438.49	8168.42	10461.2			4081.5			2550	12579.4	12288	11984	14141.1	12423.3	11469	13740.4	12899.6	12596.5	18108.6	14726	14783	12268.7	12027.7	11251	3244	3189	3216	2708
ADP-ribosylation factor-like protein 2 OS=Homo sapiens OX=9606 GN=ARL2 PE=1 SV=4	5.94	21049.1	2497.38	P36404	9	58.7	0	ARL2_HUMAN				10530.3	10022.3	10352.7	11043.7	10464.7	10317	7048.33	5037	5393.33	2481									11869.7	12207.7	12437	9207	10554	10555.7	9856	9958.33	10687	5991.33	5985.33	5940.33	2896	2883.5	2937
BRCA2 and CDKN1A-interacting protein OS=Homo sapiens OX=9606 GN=BCCIP PE=1 SV=1	4.31	36321.7	2490.96	Q9P287	11	37.26	0	BCCIP_HUMAN	14708.7	14976.3	14404	18172.3	20374.3	21261.7	20026.3	18332	21241.7	19248.7	17303	18032	14544.7	14159.7	14586.7	16196.3	15344.7	18605.7	20165	19893	21695.7	23259.3	24873.3	23870.3	26266.7	27364	25969	26938.7	26964.7	26390.7	23385.3	22147	23466	15687	16883.7	16477	11365	11558	11220.3	16048.7	16049.3
Programmed cell death 6-interacting protein OS=Homo sapiens OX=9606 GN=PDCD6IP PE=1 SV=1	6.11	96650.6	2489.5	Q8WUM4	33	42.28	0	PDC6I_HUMAN		3183		20105.7	19193	23006	18102	17972.7	20084.3	7476	8046.33	8147.33	7245.5	8639	10345			3623.5	4023		2696	17190.7	17300	17277	14467.7	14747.3	14530.3	14528	14031.3	13423.7	4415.67	4648.33	5272.33	4195.67	4604.33	4325.33	2499	2597	4296	3746.67	3741.67
Probable ATP-dependent RNA helicase DDX6 OS=Homo sapiens OX=9606 GN=DDX6 PE=1 SV=2	8.89	54816.1	2478.75	P26196	20	53.42	0	DDX6_HUMAN				14952	13985.7	13850.7	16334.3	14612	14291	12568.3	11420.7	10755.7	2373	2509	1896.33							17840.3	17719.3	17083	16641.3	15245.7	16475.7	15228.3	15553.7	15672	10469.3	10236	10108	3896	2989.33	3246.67
EF-hand domain-containing protein D2 OS=Homo sapiens OX=9606 GN=EFHD2 PE=1 SV=1	4.95	26811.4	2463.84	Q96C19	14	47.08	0	EFHD2_HUMAN	29947.7	29078	33423.7	28032.3	28617.7	29072.7	41806.5	43727.3	39803.7	39176.7	37551.5	35039.7	39225.7	38100.3	39691.8	9319.33	9567.33	9995.67	8654	8524.33	8460.67	39647.5	37428.8	38684	34695	32230.3	32154.4	29166.4	29760.3	27530.2	33070.7	33877	32422	31830.7	31100	29865.3	16789.3	16263	15208.7	12586.3	12203
Cyclin-dependent kinase 2 OS=Homo sapiens OX=9606 GN=CDK2 PE=1 SV=2	9.01	34100.7	2460.96	P24941	12	48.32	0	CDK2_HUMAN				8321	9169.33	8477	9381.67	9883.67	8620.67	5380	5047	5183.67	2693.33	2648	3063.33			2312				7746.67	8006.67	8334.67	8983.38	9664.5	9213.74	8716.18	9577.66	9223.6	5305.67	5341	4960.67	5851.5	5133	4913	4086	4640	4149	3282.69	3008.15
Inorganic pyrophosphatase 2_ mitochondrial OS=Homo sapiens OX=9606 GN=PPA2 PE=1 SV=2	7.16	38433.5	2456.71	Q9H2U2	16	55.09	0	IPYR2_HUMAN	18648.3	15625.7	14694	18557	21654	22178.7	19048.7	22019	23173.7	20492.7	19111.3	20941	15133.7	15365.3	18693	3446	8986.33	14321.3	9431.89	9897.67	6130.33	19300	20604.3	22028.7	20035.3	17980	19137	20000	19687.3	19294.7	13923	13621.7	15214	15875.7	15695	16924.7	6713.67	5967.33	6444	6895.33	6626
Hexokinase-1 OS=Homo sapiens OX=9606 GN=HK1 PE=1 SV=3	6.38	103627	2456.49	P19367	33	35.44	0	HXK1_HUMAN	4487	4884	4138	13993.7	13405.3	15424.7	17280.7	18750.3	18881.7	19559.7	17885.3	20237.7	4123.67	4306.33	4268.67	5732	5722	4323	2955	3002	2620.09	24596.7	23308	22901.3	21276.3	19981.3	20360	21640.3	21285.3	20138	12764.3	12678	12832.3	5552	5316	6435.67	5430.33	5274.33	5491	7613.67	7842.5
Ubiquitin-conjugating enzyme E2 D2 OS=Homo sapiens OX=9606 GN=UBE2D2 PE=1 SV=1	7.84	16963.4	2451.44	P62837	2	11.56	0	UB2D2_HUMAN	33657	30606	28913	39025	19841	20172	39591	36487	40725	36966	36177	41042	24918	26495	26724	18001	16259	17002	16798	15592	16816	69586	70593	73698	53658	54289	55922	57547	56026	60808	56347	53836	54957	28014	50977	47982	25809	24214	17885	25285	22040
Methionine--tRNA ligase_ cytoplasmic OS=Homo sapiens OX=9606 GN=MARS PE=1 SV=2	5.78	102313	2449.8	P56192	23	31.56	0	SYMC_HUMAN				23373.3	24101	25638	7823.33	7446	9147.33	3439.5	3542	3054.33		3012	2615			7248			2407	35493.3	32846.3	32653.7	27799	28298.7	28775	15068.3	15490.7	14833.7	3916	3742.33	3567	3598.67	4156	3312.67	2944			5480.33	5124.33
GrpE protein homolog 1_ mitochondrial OS=Homo sapiens OX=9606 GN=GRPEL1 PE=1 SV=2	8.24	24507.2	2449.09	Q9HAV7	9	43.78	0	GRPE1_HUMAN				14698.3	13499	15218	15823.7	13970.3	16563.7	17906	16407.3	17903		127.191	1046.93							19648	17341.7	16981	19533	17990.3	17965	19833.7	19183	17897	23519.7	22819	22747.7	3181.94	2671.33	2891.46		2989	3003	3928	2117.49
Sorting nexin-3 OS=Homo sapiens OX=9606 GN=SNX3 PE=1 SV=3	9.15	18819.4	2446.15	O60493	7	35.19	0	SNX3_HUMAN				5177.67	4384	5599.33	2046.27	2198.33	2643.1													9959.67	10107.7	9430.33	10231	9094.67	9803.33	7519.67	8001	7801.67	4392	3585.33	3245	4054	3436.5	4290
Keratin_ type II cuticular Hb2 OS=Homo sapiens OX=9606 GN=KRT82 PE=3 SV=3	6.38	58021.4	2445.12	Q9NSB4	4	7.41	0	KRT82_HUMAN																																		3597	3264	3148		2487	2613
Cyclin-dependent kinase 3 OS=Homo sapiens OX=9606 GN=CDK3 PE=1 SV=1	9.16	35159.9	2445.01	Q00526	6	22.62	0	CDK3_HUMAN				1783.7	2071.45	2072	2170.5	2190	2435	2682	2336	2348	2512	2116	3425		3356	4347				2637	2344	1945	3900.72	3211	3264.4	2599.62	2747.88	2821.24	4686	4461.33	4390.33	5847	6067.33	7525
Hypoxia up-regulated protein 1 OS=Homo sapiens OX=9606 GN=HYOU1 PE=1 SV=1	4.97	111564	2444.5	Q9Y4L1	48	57.16	0	HYOU1_HUMAN	31045	28464	29802	32300.7	31324	37429	31382.3	33158.3	37437.3	31015.3	33757	38183.3	30730.3	30136.7	33408.3	21559	21178.3	20824.3	18431	19239.7	18685.7	38986	41843.3	42902.3	37869.7	38453.3	39726.3	39290.7	38040	38832.3	35398.7	40446	38818	34871.3	38706	38645	33486.3	36719	37258.3	23758	22786
Isoleucine--tRNA ligase_ cytoplasmic OS=Homo sapiens OX=9606 GN=IARS PE=1 SV=2	5.77	145810	2443.25	P41252	40	36.29	0	SYIC_HUMAN	25959	22214.5	23716	33321.7	34978	38696	22045.7	21606.7	25034	9015.67	17774	21190	27767	26500	21167	31873	22523.7	24595.3	31416	31404	29231.3	37154.3	34589	33305.7	38984	38676	37413.7	28512.3	29540.7	26119.7	14328	14073.3	14150.3	12297.3	12324.3	11930.7	13210.5	11857.5	12448.5	21310	23334.3
Lamin-B1 OS=Homo sapiens OX=9606 GN=LMNB1 PE=1 SV=2	4.92	66693.6	2440.81	P20700	36	58.53	0	LMNB1_HUMAN	62106.4	56793	60456.9	52654	50644.7	56345.9	48163.3	47312.4	52393.1	55593.8	55526.2	61889.5	68922.4	64837.3	68135.4	71943.5	65307	76434	83172.9	80168.5	70610.7	15145.3	16546.3	18666.7	13978.7	26728	18948.7	13492	16105.7	18036.7	19585.7	23400	31791.3	15090.7	22304.3	29491.7	18640.3	17575	15955.3	19062.3	18880.7
Keratin_ type I cytoskeletal 28 OS=Homo sapiens OX=9606 GN=KRT28 PE=1 SV=2	5.19	51194.8	2439.88	Q7Z3Y7	8	15.95	0	K1C28_HUMAN	2128.38	1425.73	1120.58	6101.41	5979.84	7107.95	5087.44	5237.2	5878.83	3288.8	3232.36	3658.26	4640.32	4944.72	4681.06	4975.83	3806.02	3377.13	2986.32	2798.16	1818.12	7651.21	7621.03	7278.75	7233.18	6557.19	7037.5	6908.77	6539.46	6224.05	2262.5	1890.12	1997.89	1676.84	1776.07	1447.6
Cyclin-dependent kinase 20 OS=Homo sapiens OX=9606 GN=CDK20 PE=1 SV=1	6.32	38923	2432.47	Q8IZL9	2	5.78	0	CDK20_HUMAN	12331.5	9726.5	16373	8626.5	6695.5	6469.5	9218	8161	7693	12986.5	10750.5	10734.5	15480.5	14872	14977.5	11526	9179.5	9737	11472.5	10692	10438.5		1222		1714	2193		1603	1505	1521	2205	2383	2628	4852	3831	4086.5	7317	7744	7943	5300	5281
Ubiquitin carboxyl-terminal hydrolase 5 OS=Homo sapiens OX=9606 GN=USP5 PE=1 SV=2	4.72	96698.9	2429.15	P45974	32	40.56	0	UBP5_HUMAN	12062.3	12089.7	11942.3	21762.3	21331.3	23098.3	22779.7	22344	21591	23557	19590.3	21522	13651.3	13521.7	11302.3	9810.67	9261.67	9165.67	9241	10417.3	10087	19324.7	17006.7	18750.3	17241.3	16042.3	18564.3	18510.7	18750.7	18563	17928.3	15318	15843	13541.7	10912.3	11294.3	9304.33	9446	7371.33	10030.3	8610
Vacuolar protein sorting-associated protein VTA1 homolog OS=Homo sapiens OX=9606 GN=VTA1 PE=1 SV=1	5.86	34164.4	2426.84	Q9NP79	7	18.24	0	VTA1_HUMAN	24284	22732	24537	13452.3	13690	13833.7	13714.7	14097	13322	11725.7	11260	11990.3	7226	7265	8054.33	21612	19410	11604	23084	21719	23299	13099.3	13505	13582.7	13271.7	10966.3	13131.3	13042.3	12995.3	12230.3	6402	6264.33	5916.67	4068.33	3951.33	4640	2888.5	2742		3160	12977
Luc7-like protein 3 OS=Homo sapiens OX=9606 GN=LUC7L3 PE=1 SV=2	10.45	51865.4	2415.71	O95232	12	27.31	0	LC7L3_HUMAN	6468.33	7169	6106	9784	9730	10464	11132.7	10249.7	10682.7	9191	8892.33	9475	7826.33	8044	10950.7	4657	5416.67	5001	5439.67	5056.67	7277.67	15050.7	15099.3	15300.3	14677.3	14453.7	15620	13614.3	13276.3	12477	10787.3	10533.7	11014	9485	9468	9827.67	10170.7	10403.7	10273.3	8575.67	8917
BAG family molecular chaperone regulator 2 OS=Homo sapiens OX=9606 GN=BAG2 PE=1 SV=1	6.29	23943.1	2411.57	O95816	8	36.02	0	BAG2_HUMAN	8447	9488	9439	10272.7	10398.3	8305	8891	8276.67	6611.33	11691	10815.7	8990.67	10584.3	9783.33	8583	7890.33	8095.33	7499	8976	9563	7729	8887.67	9235	8393.33	8848.67	8204	8608.33	7421.33	7814.67	6722.67	9481.67	9770.67	8837.33	10645.3	9929.33	8913	8721	7218	6037.5	7481.5	10253
ADP-ribosylation factor-like protein 1 OS=Homo sapiens OX=9606 GN=ARL1 PE=1 SV=1	5.45	20531.6	2410.22	P40616	4	25.97	0	ARL1_HUMAN				4611.5	5179.5	3622	5526.5	5366	4128	3602	3234.5	3112	2044	2167	1603							8636	9570	9886	6477	7931	5042	4095	4732	7164	3288	3539	3573		2252	2556				5096	4656
Ribosome maturation protein SBDS OS=Homo sapiens OX=9606 GN=SBDS PE=1 SV=4	9.15	29048.7	2399.88	Q9Y3A5	14	48.8	0	SBDS_HUMAN	8837	11332	11667.3	26550	28282.7	30583	23245.3	23705.7	23395	14116	13951.7	15352.7	8505	8663	7095.67	6026.67	5700	6310.67	8539	7759.67	7457	32554.3	33490	33162.3	35205	31747.3	35422	32569	30489.7	26651	12610.7	13699.7	11477.7	10208.7	10523.3	10152	6888.33	6273.33	6280.67	7073.33	7032.67
Inositol monophosphatase 1 OS=Homo sapiens OX=9606 GN=IMPA1 PE=1 SV=1	4.97	30588.1	2394.08	P29218	12	45.85	0	IMPA1_HUMAN	17646	18760.7	20009.3	10605.7	11191	12104.7	9988	11168.7	12078.3	14221	14570	13619.7	17642.3	18115.3	17084	21621.3	19406	19329.7	23521.3	24846.7	21895.7	10298.7	10620.7	10784	9029	12698.3	10618.7	10476.7	10710.7	11544.7	15006	14480.3	16558	15955.7	17279.7	18824	26071	26597.3	26868.7	23961	22068.3
Charged multivesicular body protein 3 OS=Homo sapiens OX=9606 GN=CHMP3 PE=1 SV=3	4.9	25130.2	2393.58	Q9Y3E7	1	4.05	0	CHMP3_HUMAN	4056		3472	10243	9844	20097	7567	6072	10446	7982	8221	9694					4244					18304	18004	19290	18791	18476	19188	14411	13995	11529	11157	10972	10674	7231			9701	9102	9281
Eukaryotic translation initiation factor 4E OS=Homo sapiens OX=9606 GN=EIF4E PE=1 SV=2	5.76	25325.4	2380.82	P06730	7	31.8	0	IF4E_HUMAN	11869.3	10201.3	9456.67	14309	14268	18954.7	17327.3	14829.7	18788.3	18222.7	16196.7	23327	20873	22388.3	13784.7	17894	17487	3835.5	26200	24215	5788.5	21725.7	22500.7	23650.7	23917.7	21774.7	22846.3	24380.7	24907.7	23149	27416	27256	27255.7	13105	14246.7	13276.7	6134	7123	6082	4004.5	4502
60S ribosomal protein L4 OS=Homo sapiens OX=9606 GN=RPL4 PE=1 SV=5	11.69	47982.5	2376.55	P36578	17	39.34	0	RL4_HUMAN	14734	13641.7	14282	24111.3	21961.3	24204	25413.7	21931	20905	20103.7	16949.3	16878.7	15485.7	14029.7	13311.3	10432	9883.67	9042.33	19362	18080	17247	13669.3	13951.3	13438.7	14615.3	12040	16272.7	12411	13165.3	11589.3	17522	15682.7	15985.7	14610.3	12990	12242	6214	6596	6170.33	17258.7	16438
CD109 antigen OS=Homo sapiens OX=9606 GN=CD109 PE=1 SV=2	5.49	162602	2374.04	Q6YHK3	6	5.95	0	CD109_HUMAN					1384	1530		2253	2048		1860.5	2293	2393	2577	2097		4552			5539		2163	2013	1679	2016	1576	1586	2037	1434	1537
40S ribosomal protein S26 OS=Homo sapiens OX=9606 GN=RPS26 PE=1 SV=3	11.6	13300.6	2373.47	P62854	4	33.91	0	RS26_HUMAN	8640	8371	7789	8417.33	5231.5	7108.33	10031.5	10968	10432	7645.5	8099.5	11176	4790.5	5093	5504		5192	4863	13012	8755	5974.5	8410.5	9239	8938	10534.5	8920	10347.5	8488.5	8082	7695.5	13305	11897	12631	10360	10168	9952		5420	5584	17353	17228
DAZ-associated protein 1 OS=Homo sapiens OX=9606 GN=DAZAP1 PE=1 SV=1	8.76	43611.6	2364.81	Q96EP5	6	17.94	0	DAZP1_HUMAN	4890.5	5504.5	4474	3864	5355.67	6535	4075	4482.5	9950	4649	4690	5737	4407.67	4610.33	12109	6695.5	6456	7528	7531	7824.5	7032.33	6290.5	7452	7372.67	7778.67	8491	7691.33	7706.67	7638.67	7808.33	6879	5533.5	7631	7386.33	7628.67	7831.67	9934.5	10239.5	12387	11790.5	14579
COP9 signalosome complex subunit 2 OS=Homo sapiens OX=9606 GN=COPS2 PE=1 SV=1	5.21	51881.9	2362.59	P61201	19	46.05	0	CSN2_HUMAN	16111.3	14707.3	15396.7	17367.3	18217.7	19795.3	21029	20663.3	21478	25499.3	23363.7	24644.7	15859	15024.3	15067	6893.33	6934.67	7828	5258.67	4828	5243.67	18279.3	17748.3	17819	16707.7	16407.3	16067.7	17059.7	16696	15976	21088.3	19687.7	19581	18536.7	18391	16661.3	4370.33	4084.67	3817	6371	5458.5
Histidine triad nucleotide-binding protein 2_ mitochondrial OS=Homo sapiens OX=9606 GN=HINT2 PE=1 SV=1	9.65	17218.8	2362.53	Q9BX68	3	31.29	0	HINT2_HUMAN	14306	10985	11265	18624	16102.5	10943.5	14756.5	15974	23921	20739.5	20432.5	15297	30530	29597	31107	7320	10301.5	12232	3215	8557		6545	6514	10099	14598.5	11002	13832.5	19712	18566	10941	7654	5342	5270.5		4523
[truncated: 1,802 more rows]
[truncated: 71 more columns]

## Sheet: correlation
									QC	QC	QC	QC	QC	QC	QC	QC	QC	QC	QC	QC	QC	QC	QC	QC	QC	QC	QC	QC	QC	QC	QC	QC	QC	QC	QC	QC	QC	QC	QC	QC	QC	QC	QC	QC	QC	QC	QC	QC	QC
[truncated: 85 more rows]
[truncated: 43 more columns]

## Sheet: sum of inten for peptide types
peptide type	DMSO_37 1	DMSO_37 2	DMSO_37 3	DMSO_42 1	DMSO_42 2	DMSO_42 3	DMSO_47 1	DMSO_47 2	DMSO_47 3	DMSO_52 1	DMSO_52 2	DMSO_52 3	DMSO_57 1	DMSO_57 2	DMSO_57 3	DMSO_62 1	DMSO_62 2	DMSO_62 3	DMSO_67 1	DMSO_67 2	DMSO_67 3	20gamma_37 1	20gamma_37 2	20gamma_37 3	20gamma_42 1	20gamma_42 2	20gamma_42 3	20gamma_47 1	20gamma_47 2	20gamma_47 3	20gamma_52 1	20gamma_52 2	20gamma_52 3	20gamma_57 1	20gamma_57 2	20gamma_57 3	20gamma_62 1	20gamma_62 2	20gamma_62 3	20gamma_67 1	20gamma_67 2	20gamma_67 3	100gamma_37 1	100gamma_37 2	100gamma_37 3	100gamma_42 1	100gamma_42 2	100gamma_42 3	100gamma_47 1
[truncated: 7 more rows]
[truncated: 36 more columns]

[truncated: 7 more sheets: project details, config, fmolug, ppm, absqfmol, absqng, protein homology]
