# Supplementary material for: Label-Free Quantitative Thermal Proteome Profiling Reveals Target Transcription Factors with Activities Modulated by MC3R Signaling
Source: Anal Chem. 2023 Oct 7;95(41):15400–8. doi: 10.1021/acs.analchem.3c03643 (PMC10585664; doi:10.1021/acs.analchem.3c03643)
Supplement: Supplementary file 7 — ac3c03643_si_006.xlsx [file ac3c03643_si_006.xlsx]

## Sheet: Pathways
Name

## Sheet: 20gamma_fold_changes
Identifier

## Sheet: 100gamma_fold_changes
Identifier

## Sheet: 500gamma_fold_changes
Identifier

## Sheet: 20alpha_fold_changes
Identifier

## Sheet: 100alpha_fold_changes
Identifier

## Sheet: 500alpha_fold_changes
Identifier

## Sheet: 20ACTH_fold_changes
Identifier

## Sheet: 100ACTH_fold_changes
Identifier

## Sheet: 500ACTH_fold_changes
Identifier
