# Supplementary material for: Label-Free Quantitative Thermal Proteome Profiling Reveals Target Transcription Factors with Activities Modulated by MC3R Signaling
Source: Anal Chem. 2023 Oct 7;95(41):15400–8. doi: 10.1021/acs.analchem.3c03643 (PMC10585664; doi:10.1021/acs.analchem.3c03643)
Supplement: Supplementary file 8 — ac3c03643_si_005.xlsx [file ac3c03643_si_005.xlsx]

## Sheet: TPP_user designed 20220424-1210
cluster	avg_mass	avg_rt	avg_ref_rt	avg_drift_time	intensity in DMSO 1	intensity in DMSO 2	intensity in DMSO 3	intensity in ACTH20 1	intensity in ACTH20 2	intensity in ACTH20 3	intensity in ACTH100 1	intensity in ACTH100 2	intensity in ACTH100 3	intensity in ACTH500 1	intensity in ACTH500 2	intensity in ACTH500 3	intensity in alpha20 1	intensity in alpha20 2	intensity in alpha20 3	intensity in alpha100 1	intensity in alpha100 2	intensity in alpha100 3	intensity in alpha500 1	intensity in alpha500 2	intensity in alpha500 3	intensity in gamma20 1	intensity in gamma20 2	intensity in gamma20 3	intensity in gamma100 1	intensity in gamma100 2	intensity in gamma100 3	intensity in gamma500 1	intensity in gamma500 2	intensity in gamma500 3	workflow_index	sequence	modifier	type	start	end	frag_string	products	peptide_annotated_max_score	peptide_overall_max_score	peptide_fdr_level	peptide_annotated_replication_rate	peptide_overall_replication_rate	signal_mass	signal_intensity
2093	516.3152	46.75	47.67	78.7262						2551			2145											2301						1726					20	AAVAGK		PEP_FRAG_1	369	374	y3y4y6	3	6.6202	6.8458	0.0011	1	6	516.3164	1832.0
2123	516.3159	43.95	45.5	77.8588				90102	78439	69444	83083	84973	62962	58208	56438	53105		58067		85516	76912	77012	81276	92532	80228	85462	86475	85007	88077	86391	89897	5138		5795	16	GVVGGK		PEP_FRAG_1	362	367	b2b3b5b6y1y3y4y6	8	7.4711	7.4711	0.0001	9	13	516.3168	110698.0
2125	516.3163	46.6	45.98	77.5337																												82581	78254	88114	30	GVVGGK		PEP_FRAG_1	362	367	b2b3b5y1y3y4y6	7	7.2587	7.4711	0.0001	3	13	516.3164	73056.0
3628	530.2965	27.89	30.67	77.1157											1345					1924				2199											20	TPGGAK		PEP_FRAG_1	219	224	b6y5	2	5.7895	5.9116	0.0016	1	2	530.298	1804.0
3698	530.3319	46.54	48.22	82.2934	25119				2446					2463		2431				2674			2321		2466	2820	2717								12	AGIAAK		PEP_FRAG_1	2	7	y3y6	2	5.4111	5.4111	0.0024	1	3	530.334	1849.0
3700	530.3321	49.63	49.02	81.3827																												2486	2661	2757	29	AGIAAK		PEP_FRAG_1	2	7	b3	1	5.0727	5.4111	0.0024	1	3	530.3336	1718.0
3768	530.3317	45.94	47.14	82.4948	44978	70878	47397	112132	107369	16841	100945	94733	21946	95243	95555	98702		80466	20551	100732	111217	110098	134094	130047	131837	125707	124991	122647	103380	103675	106968	122687	125848	113633	11	AGIAAK		PEP_FRAG_1	2	7	b3y6	2	5.1296	5.4111	0.0024	1	3	530.3314	18978.0
4636	538.2634	34.84	37.02	78.899																										1462					26	GGYGGK		PEP_FRAG_1	571	576	y3y6	2	6.2402	6.364	0.0013	1	3	538.2634	1462.0
4687	538.2658	32.51	34.8	80.2205				5270	5559		3790	3590	3932	3126		4094		2880	3543	5625	4803		6359			5847	5438		4646		5776				15	GGYGGK		PEP_FRAG_1	571	576	y3y6	2	6.364	6.364	0.0013	1	3	538.2643	2451.0
5494	546.2901	26.12	28.94	77.954														2166		6038			6183		6073					3246					19	SSAGPK		PEP_FRAG_1	469	474	y3y6	2	6.7746	6.7746	0.0011	2	2	546.29	5538.0
5663	547.2599	23.68	25.96	75.8761							2060				2363	2294			2083							5402	4509	4535	1851			2477		2669	12	SGGGGGR		PEP_FRAG_1	39	45	y1y4y7	3	6.6173	6.6173	0.0011	2	2	547.2611	1926.0
6040	550.2753	39.51	41.21	78.2702	67243			123408	126537	119145	104578	110144	101602	142871	126009	126632		79612	103841	108962	122275		97547	102577	88211	118328	113749	116706	106452	110011	112461				6	GGGGFR		PEP_FRAG_1	613	618	b3b5b6y1y3y4y6	7	6.7445	6.7445	0.0011	13	13	550.2754	313002.0
6042	550.2757	42.66	41.83	77.9512		65009	69390																									57007		69812	2	GGFGGR		PEP_FRAG_1	661	666	b4y6	2	5.7032	5.7032	0.0016	2	2	550.2747	21023.0
6883	556.3472	47.71	49.07	87.9756						2049											1741	1634	2090	2052											19	GAPLAK		PEP_FRAG_1	55	60	b3b4y6	3	5.7524	5.7524	0.0016	3	4	556.349	1594.0
7602	558.3626	44.85	43.87	86.4208	5132	4885	4445																									2701	3043	3134	29	GAAVIK		PEP_FRAG_1	231	236	b3y6	2	6.9505	6.9505	0.0008	3	3	558.3634	1950.0
7683	559.313	32.74	34.63	84.115													5434																		13	LGGANK		PEP_FRAG_1	898	903	y5*y6	2	5.4855	6.197	0.0013	1	2	559.313	5434.0
7718	559.3227	32.93	34.83	83.9441	13610	11892	10370		11478	10351	8100	8261			7801	7465		7330	10893	10494	13893	13214	12348	12083	12586	9069	9941	9985	7977	7629	8609				16	LGGANK		PEP_FRAG_1	898	903	b6y5*y6	3	6.197	6.197	0.0013	1	2	559.3241	13134.0
7841	560.271	33.84	35.52	78.1042				5160				5720	5324										6230												4	DPGGSK		PEP_FRAG_1	187	192	b3y6	2	4.5767	4.5767	0.0032	1	2	560.2716	3454.0
7962	560.3421	31.89	33.69	83.184	4410			44303	44663	37266	32122	32099	22204	30065	34136	37070		29103	38226	61191	47312	48335	50220	47300	64930	45455	44184	51114	39654	33460	39246	59265	59585	53518	30	VSGIGK		PEP_FRAG_1	354	359	b2b2∞b4b5b6y1y3y4y5y5∞y6	11	7.1907	7.1907	0.0006	9	9	560.342	43614.0
8130	562.2849	27.33	29.12	79.5225				1614			2605		2782							5568	5243								2511	2066	3375	2929		3043	28	DGSGVK		PEP_FRAG_1	200	205	b3b6y6	3	5.1944	5.6985	0.0022	1	2	562.2865	2074.0
8649	566.2966	34.32	36.26	85.7179				2133	1884	3347										2667			4017	3919	3701		2156			2102		2501			23	TGFGGK		PEP_FRAG_1	267	272	y3y6	2	6.4622	6.4622	0.0012	1	7	566.295	1383.0
8662	566.293	40.81	41.44	82.2332						1828										1244			1435										2119	1995	6	TGFGGK		PEP_FRAG_1	267	272	y3y6	2	6.3183	6.4622	0.0012	1	7	566.293	2502.0
9064	570.3628	31.32	32.83	86.4088						3023					1313	1353				1422	1303				1399	2157					2286	17934	19573	21010	22	AAAPLK		PEP_FRAG_1	2	7	b3y3y6	3	5.963	5.963	0.0015	3	3	570.3635	1482.0
9076	571.3013	32.34	34.25	77.863													5961																		13	ASPPTV		PEP_FRAG_1	914	919	y4y4∞	2	6.5875	7.9379	0.0000	1	29	571.3013	5961.0
9145	571.3104	32.95	34.5	77.8358	7642	8468	6360	10101	8943	6746	7357	8458	6774	5741	7432	7576		6671	6838	9432	7843	7762	9461	9595	9880	9506		8525	7280	7258	7104	6965	7578	7531	6	ASPPTV		PEP_FRAG_1	914	919	y2y3y4y4∞	4	7.9379	7.9379	0.0000	28	29	571.3105	17918.0
9548	572.3424	31.82	30.85	80.8063																												19335	20874	20696	29	TGPVAK		PEP_FRAG_1	210	215	b4b6y2y3y6	5	7.0208	7.0208	0.0007	1	3	572.3429	16660.0
9574	572.3782	35.39	34.53	86.245																												28346	29316	30838	29	GLAAIK		PEP_FRAG_1	406	411	b2b3b4b5y2y3y4y6	8	7.7422	7.7422	0.0000	3	4	572.3784	23085.0
9579	572.342	31.39	33.66	86.6432				18655	17124	12236	17931	18891	12507	3393	4634	4875		16635	22451	28442	24365	25897	24304	23417	28197	21543	20356	22855	20789	18866	20427				19	SALGPK		PEP_FRAG_1	518	523	b6y3y6	3	6.1563	6.1563	0.0014	3	3	572.3424	24373.0
9580	572.3412	30.54	33.14	82.1516							3210	3101			4012	4392				3446			4550		6027			3968	5129	5985					19	TGPVAK		PEP_FRAG_1	210	215	b3b4y4y6	4	6.7797	7.0208	0.0007	2	3	572.3405	3822.0
9588	572.3786	55.02	54.57	89.2315	5189	5528	5926																									3894	3125	3895	1	GLAAIK		PEP_FRAG_1	406	411	b3y6	2	4.2179	7.7422	0.0000	1	4	572.3782	1290.0
9943	575.3198	32.24	31.43	83.959																												2716			28	AGATAGK		PEP_FRAG_1	27	33	b3y7	2	5.7333	5.7663	0.0016	1	3	575.3198	2716.0
10077	574.3576	57.08	58.22	87.8133	9513	7111	8923	17288	16295	13880	15195	18678	14951	17866	21763	23046		23117	26631	22161	16527	15451	23510	22956	22835	19761	17387	16736	17224	15792	16310	18542	17243	20617	17	GSLGIK		PEP_FRAG_1	127	132	b3b3∞b4b4∞y3y4y6	7	6.3558	6.73	0.0011	2	5	574.3563	32790.0
10092	575.3164	35.54	36.85	81.8139				4807	4368	4193			4018					2426					4736		4619		3990	3919	3381	2789	3722	7656	8575	7902	30	AGATAGK		PEP_FRAG_1	27	33	y1y4∞y7	3	5.6739	5.7663	0.0016	1	3	575.314	5584.0
10204	576.3361	42.55	43.38	85.6763				3022																	3527				2232	2304		4797	4868	5311	4	TGGTIK		PEP_FRAG_1	60	65	b3y6	2	4.8616	4.8616	0.0030	2	2	576.3362	1974.0
10213	575.3399	52.81	54.03	84.9508	25353	25816	27190	37318	35031	31280	42372	41550		26451	32074	34987		26684	28945	31205	29347	27558	34837	39311	34687	28536	28558	26779	49853	47343	56442	21075	19438	20908	18	SSLVLG		PEP_FRAG_1	149	154	b2b3b3∞b4y2	5	7.9977	7.9977	0.0000	28	29	575.3401	55642.0
11405	584.379	49.76	49.11	90.2373																												38148	39110	42400	30	AVVPAK		PEP_FRAG_1	229	234	b2b3y1y2y3y4y6	7	7.6731	7.8319	0.0000	2	4	584.3789	33705.0
11410	584.3788	47.03	48.71	90.7241				22329	20993	15059	13674	13984	10359	24263	26580	26942		11052	11771	21462	15310	15504	30288	35482	28439	29119	26595	21775	30511	29103	30270				16	AVVPAK		PEP_FRAG_1	229	234	b2b3b4y1y2y3y4y6	8	7.8319	7.8319	0.0000	2	4	584.3795	25228.0
11490	584.3788	52.02	53.4	93.1018				8194	7990	5497	6799	6628	5555	7823	8905	8462		5798	5722	8721	7513	6723	11338	12724	11276	9886	10167	8433	9864	8736	9924	12980	12380	13267	28	LLPGGK		PEP_FRAG_1	652	657	b2y4y5y6	4	6.0816	6.0816	0.0015	3	3	584.3775	10233.0
11522	586.2962	28.62	27.74	80.9502	5991	5840	7029																									9565	8528	8683	28	EPGAGR		PEP_FRAG_1	1431	1436	b3b5b6y5y6	5	6.3832	6.3832	0.0013	2	2	586.2967	7875.0
11601	586.2968	22.81	23.16	80.9993																												2996	3220	2366	28	DAPAGR		PEP_FRAG_1	228	233	y1y4y6	3	6.5068	6.5068	0.0011	3	3	586.2962	2250.0
11608	586.3937	43.01	42.12	90.89		3382																													2	GLVLGK		PEP_FRAG_1	707	712	b2b3y3y6	4	7.3582	8.2259	0.0000	1	20	586.3937	3382.0
11625	586.3932	51.55	51.12	86.845																												6521	5699	5473	30	GLVLGK		PEP_FRAG_1	707	712	b2y4y6	3	6.9654	8.2259	0.0000	1	20	586.3931	3594.0
11627	586.3943	54.4	54.04	89.3053																												70261	71431	71178	29	LGGVIK		PEP_FRAG_1	94	99	b3b4b5b6y1y5y6	7	6.8756	7.0185	0.0007	2	9	586.3946	58945.0
11629	586.3919	58.19	58.5	92.4557						1861			1846								1994														17	LLVGGK		PEP_FRAG_1	474	479	y3y5	2	6.088	6.088	0.0016	2	2	586.3915	2372.0
11657	586.3938	54.79	56.05	91.3411				7476	7305		6885				3650				8209	10030	9471					10176	10223	9811			6952	8457	8764	9582	17	VAGLVK		PEP_FRAG_1	591	596	b3b4y2y4y6	5	5.9668	6.9096	0.0009	5	16	586.3924	17944.0
11681	586.3929	49.11	50.73	87.4781				6685	6285	4956		3744	3589					2861	3412	9226	6783	7928	5349	4624	5151	3996	3921	3885	4394	4444	6451				6	GLVLGK		PEP_FRAG_1	707	712	b2b3b5y3y4y6	6	8.2259	8.2259	0.0000	9	20	586.3931	13649.0
11708	587.355	27.31	30.16	90.024							1006																								7	GAQLAK		PEP_FRAG_1	167	172	b3y6	2	6.2427	7.3851	0.0003	1	4	587.355	1006.0
11709	586.3943	52.05	53.66	89.6555				58623	51989	38403	42572	39759	35987	55175	54508	56405		34513	37275	56518	48874	49304	61899	64391	58769	61524	59984	53734	56172	53526	54168				6	LGGVIK		PEP_FRAG_1	94	99	b3b4b5y4y5y6	6	7.0185	7.0185	0.0007	7	9	586.394	113591.0
11769	587.3532	31.36	30.63	89.4593	39312	40365	39443			9235																						25333	24031	25476	28	GAQLAK		PEP_FRAG_1	167	172	b3b4b5y2y3y6y6*	7	7.3851	7.3851	0.0003	3	4	587.3524	21447.0
11983	588.3369	27.78	30.23	86.8631				3513	3836	3787					3541	3748				6080	5103	4542	5166	4843			5001	5141	3478	3668					16	AEALGK		PEP_FRAG_1	1253	1258	b3y3y6	3	6.421	6.421	0.0013	8	8	588.3372	7179.0
12167	588.3373	36.77	38.23	86.5825	9807	7371		18472	17242	14922	13443	12980		13569	14571	14181		12694	16466	26376	24375	22563		19137		22897	20351	19897	15045	16238	15448	16587	17484	17143	28	GAEALK		PEP_FRAG_1	1837	1842	b3b4y3y6	4	6.6785	6.6785	0.0011	2	2	588.3376	13097.0
12313	590.2707	38.09	39.7	79.431													9119																		13	DGGDVK		PEP_FRAG_1	88	93	y4y6	2	5.0227	6.2052	0.0013	1	7	590.2707	9119.0
12403	590.2804	38.41	39.73	79.5304	23112	21195	22218	19193		12784	14796	13306		16517	18324	16276		9744	12243		17212	14896	24242	24146	21361	19351	21731	18315	22566	20676	22430	15286	16622	17888	18	DGGDVK		PEP_FRAG_1	88	93	b5b5∞y4y4∞y6	5	6.2052	6.2052	0.0013	6	7	590.2794	24542.0
12419	590.3536	41.9	40.96	89.9907	15309	14911	14499																									17992	19019	19581	30	VTVSGK		PEP_FRAG_1	145	150	b3y2y3y4y5y6	6	6.5709	6.5709	0.0011	2	2	590.3536	15007.0
12440	590.3522	40.79	42.24	84.4274				9561	8026	7220		7854		6267	6767	6884							15633	14313	14279				12790	12049	11959	10112	10633	9860	25	AATVTK		PEP_FRAG_1	1718	1723	b3b4b6y2y3y6	6	6.1242	6.1242	0.0015	2	2	590.3536	8628.0
12803	593.2941	41.8	43.93	83.357																			1251												19	TTAFGP		PEP_FRAG_1	458	463	b3∞	1	5.3778	5.8967	0.0016	1	3	593.2941	1251.0
13320	595.275	28.93	31.33	87.7153					2539		5328	5241	5038					4642		6251		4288	5334	4456		15430	15473	13097		3569	3355				16	SGLMST		PEP_FRAG_1	494	499	y5∞	1	4.3161	5.8369	0.0016	2	6	595.2756	7384.0
13344	595.2779	37.3	39.53	84.383												1635																			12	SGLMST		PEP_FRAG_1	494	499	b3	1	5.7762	5.8369	0.0016	1	6	595.2779	1635.0
13371	595.2745	36.71	38.65	81.7997				9711	9647	9320	18672	20137	17870					11282	14559	13121	15788	14051	13513	14340	14188	25326	26619	27508	8291	9632	9150				14	SGLMST		PEP_FRAG_1	494	499	b3∞y3∞	2	4.9967	5.8369	0.0016	2	6	595.2748	6096.0
13444	596.2698	28.73	27.84	83.864																												5437	4698	5009	28	GDYGGK		PEP_FRAG_1	831	836	y3y4y6	3	6.2029	6.2029	0.0013	3	3	596.27	4109.0
13783	598.3931	53.25	54.67	90.9631				7513	8257	5646	5362	5125	4206	5296	5404	5600					2901		10129	9253	9582	2764	2820	2680	5201	4913	5038	7057		6808	28	APVAIK		PEP_FRAG_1	225	230	b3b4b5y3y6	5	5.7317	5.7317	0.0017	2	2	598.3942	5129.0
13808	598.3933	38.12	39.71	93.1483				12956	12607	10635	14035	12444	9708	8803	12800	12520		10153	9918	11415	9089		12491	13241	12593	10564	10088	9620	10309	9794	10200	14952	13295	17456	11	AGLIPK		PEP_FRAG_1	118	123	b3y3y6	3	7.4295	7.4295	0.0003	16	16	598.3945	13834.0
13941	600.4019	36.14	37.8	93.048													48419																		13	GLVIAK		PEP_FRAG_1	577	582	b4b5y3y4y6	5	7.8218	8.431	0.0000	1	27	600.4019	48419.0
13946	600.4102	30.31	29.4	91.146	4465	5341																										17779	18904	20459	30	LIVAGK		PEP_FRAG_1	580	585	b3b5y3y5y6	5	6.7361	6.7361	0.0011	2	3	600.4105	16859.0
13953	600.4015	57.55	58.71	92.902													6843																		13	LLAVGK		PEP_FRAG_1	355	360	y3y4y5y6	4	5.8299	6.6284	0.0011	1	11	600.4015	6843.0
13954	600.4007	48.99	50.26	92.448													6140																		13	GIGILK		PEP_FRAG_1	120	125	b4y4	2	6.0882	7.4938	0.0001	1	20	600.4007	6140.0
13956	600.4103	39.76	38.76	92.9092	28047	27263	28229																									55215	56873	58567	28	GLVIAK		PEP_FRAG_1	577	582	b2b3b4b5y2y3y4y6	8	8.2681	8.431	0.0000	5	27	600.4103	46017.0
13960	600.4093	51.72	51.17	92.3362	5662	5732	5549																									12155	12378	13578	28	GIGILK		PEP_FRAG_1	120	125	b3b4y1y2y4	5	6.8464	7.4938	0.0001	2	20	600.4091	9529.0
13976	601.3322	26.7	25.9	89.972	13414	9120	13948																									10713	10118	9676	1	QPASAK		PEP_FRAG_1	2	7	b4y5∞	2	5.5652	5.5652	0.0016	1	2	601.3313	3607.0
13989	601.3358	33.4	35.82	90.24												1204																			12	QPASAK		PEP_FRAG_1	2	7	y4y6	2	5.3438	5.5652	0.0016	1	2	601.3358	1204.0
14008	600.4098	44.9	46.57	95.1058				14385	14495	11935	11034	11228	11720	10720	11624	10824		5023	6297	7117	8181		14089	14312	13667			7739	8274	8225	10010				19	LAVGLK		PEP_FRAG_1	339	344	b3b4y1y3y5y6	6	6.7594	6.7594	0.0011	2	2	600.4098	13379.0
14025	600.4091	48.67	50.35	92.6234				13980	12910	9633	9039	9134	8335	10816	9906	10752		7268		10395		10580	10510	10080	10348	11944	12208	11703	9676	10556	9871				11	GIGILK		PEP_FRAG_1	120	125	b3b4y1y2y4y6	6	7.4938	7.4938	0.0001	17	20	600.4095	9868.0
14058	600.4093	57.66	58.8	92.947	7386	6791	6299	12002	9619	6806	9103	9625	7326	10625	11098	10485		7799	8134	13843	11143	10287	11312	11488	11291	13266	13113	12199	11070	10802	10778	11713	12174	12826	17	LLAVGK		PEP_FRAG_1	355	360	b2b5y3y4y5y6	6	6.6284	6.6284	0.0011	10	11	600.4082	21523.0
14062	601.3695	33.42	32.48	90.3407	81915	85398	86610																									59618	60068	62536	28	NLGIGK		PEP_FRAG_1	302	307	b2b2*b3b3*b4b5b6b6*y2y3y4y5y6y6*	14	9.0848	9.0848	0.0000	6	7	601.3689	51262.0
14205	602.3526	35.7	34.91	87.4317	10803	10422	9415			13831																						27406	26381	27463	28	GGDLLK		PEP_FRAG_1	209	214	b3b4b5b6y1y2y3y6	8	7.2656	7.2656	0.0005	6	8	602.3531	22459.0
14231	602.3304	41.28	40.52	88.747																														2767	30	GVEAAR		PEP_FRAG_1	76	81	b3y6	2	6.2822	6.9849	0.0007	1	3	602.3304	2767.0
14234	602.3532	50.33	49.86	90.333																														5380	30	VLAGDK		PEP_FRAG_1	854	859	y4y5y6	3	7.3604	7.7576	0.0000	1	4	602.3532	5380.0
14235	602.3371	36.88	38.93	88.5994				8463	7855	7457					2949			10383	13622	11983			9179	8753	8413	10238	10056	9871	8835	8823	8258				6	GVPMAK		PEP_FRAG_1	94	99	y2y4y6	3	6.2071	6.2071	0.0013	3	3	602.3347	20782.0
14325	603.3483	24.68	24.3	89.1703																												14892	11909	19805	28	GAIGTGK		PEP_FRAG_1	71	77	b3y4y4∞y7	4	6.8318	6.8318	0.0011	2	2	603.3485	13089.0
14331	603.3478	27.22	26.41	86.732																												9382	7813	7948	28	GSALQK		PEP_FRAG_1	515	520	b3y6	2	5.7924	5.7924	0.0016	1	2	603.348	7820.0
14339	603.3477	29.37	31.33	89.7766						15508	2519	4228			2097	3239		4369	1712	3466	2638				2313	12418	8488	9401		2793	18433	51642	50813	50399	23	GSALQK		PEP_FRAG_1	515	520	b4y6	2	5.3803	5.7924	0.0016	1	2	603.3485	4792.0
14432	601.3693	58.0	59.3	92.1806				2070		2810			2942								2945	2964	2087	1774		1943	1859								9	NLGIGK		PEP_FRAG_1	302	307	b6y4y6	3	7.2309	9.0848	0.0000	1	7	601.3685	3503.0
14440	602.3521	47.57	49.27	90.7253				10674	9208		9040	9375	7744	6783				8197	10183	12566	13577			13372	12576	9893	10727	9388		9815	8260				16	VLAGDK		PEP_FRAG_1	854	859	y4y5y6	3	7.7576	7.7576	0.0000	3	4	602.3525	14259.0
14541	604.3316	36.05	38.07	88.3553				4375	4487	3491	5884	5668							1426		3793		8369	8384	7364	5430		4455	7066	6795	7361				4	ADLASK		PEP_FRAG_1	136	141	b3y3y6	3	7.1231	7.1231	0.0006	1	2	604.3319	2865.0
14568	604.3616	41.47	42.94	86.326													1687																		13	GSISLK		PEP_FRAG_1	161	166	b3y3y6	3	6.5725	6.5725	0.0011	1	3	604.3616	1687.0
14571	604.3659	41.5	42.77	86.957															2474																15	GSISLK		PEP_FRAG_1	161	166	b3y3y6	3	6.3207	6.5725	0.0011	1	3	604.3659	2474.0
14574	604.365	44.33	45.81	87.8017				4533						3295									4169	4187	4159	4085		4448	3590		3840		3172	3805	30	GSISLK		PEP_FRAG_1	161	166	y3∞y6	2	6.1814	6.5725	0.0011	1	3	604.3654	2428.0
14581	604.3603	52.29	53.51	90.739													15564																		13	SLGLSK		PEP_FRAG_1	13	18	y4y6	2	6.2668	7.3432	0.0004	1	10	604.3603	15564.0
14793	604.3687	42.71	44.45	93.824				32415	27084	31764	26849	26402	26062	8297	10236	10504		24055	33285	23478	27861	24525	28971	29081	28981	16344	15362	16318	17752	17556	19258				20	LSISGK		PEP_FRAG_1	118	123	b2b3∞b4b6y2y3y3∞y4y5y5∞y6	11	6.9672	6.9672	0.0008	4	4	604.3685	30216.0
14849	606.3632	33.93	33.21	90.4543																												2867	2937	3132	29	APPPPK		PEP_FRAG_1	354	359	y4y6	2	4.7104	4.8053	0.0030	1	3	606.3639	1890.0
14852	605.3502	41.3	42.49	86.4816				4160	3537	3138	2518		3743	3234	3967	3832						3248					3202					2175	1960		9	ITSTAL		PEP_FRAG_1	735	740	b2b2∞b5∞b6y3	5	5.9402	5.9402	0.0016	4	15	605.3511	3531.0
14855	606.3623	33.9	36.28	92.1939							1974				1841	1849			1430	1434	1511		1631												12	AAVAFK		PEP_FRAG_1	41	46	b3	1	5.1661	5.6122	0.0019	1	3	606.3644	1513.0
14856	606.3634	39.58	38.6	91.4697	54674	55297	62479																									110027	104561	113617	29	AFLAGK		PEP_FRAG_1	128	133	b3b5y3y6	4	6.7734	6.9848	0.0007	2	4	606.3637	86303.0
14867	606.3637	35.45	37.47	91.822				96486	95734	116054	86312	87820	70904	79865	89229	93554		61239	81728	110815	104991	91920	101458	107490	103568	109113	92868	90491	99291	90712	94673				21	AFLAGK		PEP_FRAG_1	128	133	b3b5y1y3y6	5	6.9848	6.9848	0.0007	2	4	606.3633	115135.0
14896	606.3375	47.29	48.95	88.3149				8857	8545	7097	7735	6467	7640	7652	8435	8095		5147	7515	8493	11456	8313	7942	7425	6797	6134	7775	5657	7667	7884	6814				6	GGLGFR		PEP_FRAG_1	413	418	b3y4y6	3	6.0938	6.0938	0.0016	5	10	606.3386	20430.0
14900	604.3681	51.73	53.59	90.791				25545	23441		24330	22609		20127	24066	23543		17521		32671				30387		25100			28441	27808					22	SLGLSK		PEP_FRAG_1	13	18	b2b3y2y4y5y6	6	7.3432	7.3432	0.0004	9	10	604.3681	20458.0
14963	606.3623	38.6	40.55	91.8415				15960	16650	15444	11489	10940	12715	10507	10483	11517		9773	12893	13875	24167	16476	22167	20342	15850	18123	19200	19459	16983	15933	16926				17	ALGFAK		PEP_FRAG_1	815	820	y4y6	2	6.1357	6.1357	0.0016	1	2	606.3627	4160.0
15403	611.2695	23.96	23.81	83.0662	10863	12326	11375																									8706	11289	10193	30	YSGSTP		PEP_FRAG_1	258	263	b2b3b3∞b5b5∞b6∞y2	7	7.8289	7.8289	0.0000	4	5	611.2697	8788.0
15571	612.4104	56.55	57.79	97.9103				7091	6148	4830	3525	4669	3516							3576	3038	3272	6246	5585	5713				3327	2681	3273	4846	4712	5298	17	VPVLGK		PEP_FRAG_1	1128	1133	b3	1	5.5994	6.6308	0.0011	1	7	612.4095	4230.0
15610	612.41	52.92	54.39	99.6768				3020	3108	2684	4457	4290	4277					2647		3746	3739	3739		3125	2998										4	VPVLGK		PEP_FRAG_1	1128	1133	y5y6	2	6.6308	6.6308	0.0011	4	7	612.4093	1947.0
15855	614.4185	71.71	72.77	99.341													2420																		13	ALGILK		PEP_FRAG_1	237	242	b4y4y6	3	5.7289	6.8857	0.0010	1	14	614.4185	2420.0
15857	614.4255	52.31	51.75	95.6487																												6836	7286	7749	30	ALGILK		PEP_FRAG_1	237	242	b4y4y6	3	6.3767	6.8857	0.0010	2	14	614.4251	5416.0
15884	614.4255	49.51	51.16	96.2221				6082	6368	4623	4805	4727	4229		2454	2568		5990	6184	5774	5733	5215	6446	6434	6176	6849	7029	6972	3541	3569	3830				23	ALGILK		PEP_FRAG_1	237	242	b2b3b4y2y4y6	6	6.8857	6.8857	0.0010	9	14	614.426	5021.0
15913	615.3452	31.51	33.86	87.4906				2444	2398						2122	2212				3640		3963		3714	4199	2487	2260			1964	2221			2223	16	ANVPSK		PEP_FRAG_1	482	487	y3∞y6	2	6.2546	6.2546	0.0013	2	2	615.346	3656.0
15914	614.425	71.43	72.78	99.5109				2748	2275	3030		1698	1581		2456	2422		3815	5077	2605	3971	3556	2622	2989	2862	2954	2788	2649		2455	2248	3766	3828		19	ALGILK		PEP_FRAG_1	237	242	b3b4y4y6	4	6.2099	6.8857	0.0010	2	14	614.4235	1990.0
15923	615.3816	52.72	53.75	93.2235							2622		3459	2277					2062																10	QAGLVK		PEP_FRAG_1	209	214	y4	1	5.1191	5.247	0.0026	1	2	615.3813	1023.0
15927	615.3356	58.44	60.49	85.933																1133															16	DIASLP		PEP_FRAG_1	145	150	b4	1	5.0283	5.0283	0.0029	1	11	615.3356	1133.0
15940	615.3465	38.37	39.96	88.1812						3221		6150	5583					7986	10764		11005	9884	7222	7149	6984	9701	10458	10353	6058		5423			3080	25	GSNPLK		PEP_FRAG_1	706	711	b3b4y1y3y6	5	6.5414	6.5414	0.0011	4	4	615.3488	3878.0
16065	616.3685	38.8	37.93	92.106																													1501		29	LDGLAK		PEP_FRAG_1	100	105	b3y6	2	5.7275	6.1573	0.0014	1	2	616.3685	1501.0
16078	616.296	38.01	39.46	84.4977				2866					2095		1811	1558			1873	2693	3119	2995	4262	4156	3740	2002	2105	2152				3114	2932	3927	19	GPDEAK		PEP_FRAG_1	118	123	b4b5y2y6	4	6.5729	6.5729	0.0011	6	6	616.2957	3497.0
16080	616.3671	43.49	45.66	90.887																					2008										21	ADAIVK		PEP_FRAG_1	243	248	b4∞	1	5.157	6.2338	0.0013	1	4	616.3671	2008.0
16096	616.3788	52.16	51.66	91.2093																												10366	11157	11167	30	AASIVR		PEP_FRAG_1	2	7	b4∞b6y6	3	4.9364	4.9839	0.0029	1	3	616.3789	8193.0
16104	616.3673	66.59	66.59	93.988						2346																									6	GLDALK		PEP_FRAG_1	850	855	b2y4	2	5.8451	6.5037	0.0011	1	4	616.3673	2346.0
16109	616.3449	37.09	39.03	91.6957				16109	13094	9524	10258	10899	9056	13587	15557	15716		8633	9651	15001	12733	14016	11653	11816	11168	15536	15476	14080	10252	10681	10303				5	GGNIGAK		PEP_FRAG_1	657	663	y2y3y7y7*	4	6.3545	6.3545	0.0013	3	4	616.345	9670.0
16118	616.4069	29.82	29.06	95.744																												1360			28	GSIVLK		PEP_FRAG_1	655	660	b3∞y6	2	5.5655	6.7316	0.0011	1	4	616.4069	1360.0
16125	616.4039	33.21	35.65	94.5735											6257									6659					6486	5196					20	VSIAVK		PEP_FRAG_1	72	77	b3b3∞b4y3y6	5	7.0938	7.0938	0.0006	3	3	616.4039	6395.0
16129	616.3971	39.98	41.49	96.902													16381																		13	ISVLGK		PEP_FRAG_1	195	200	b3y3y5y6	4	7.237	7.5991	0.0000	1	11	616.3971	16381.0
16130	616.4026	35.35	36.4	95.486																	4336	3875												12053	30	GSIVLK		PEP_FRAG_1	655	660	b3b4y2y3y6	5	6.4907	6.7316	0.0011	1	4	616.4022	8994.0
16133	616.4052	35.6	34.73	92.0372	147656	149115	181655																									76658	71775	76925	30	GVITVK		PEP_FRAG_1	197	202	b2b3b4b4∞b5∞y2y3y3∞y4y4∞y6	11	8.4656	8.4656	0.0000	1	3	616.4043	63710.0
16155	616.3661	51.23	52.96	90.0595				1996	1867									2395	2236		3193		3658	3221		3006		2594	2034	2214					24	ADAIVK		PEP_FRAG_1	243	248	b3y3y6	3	5.9399	6.2338	0.0013	1	4	616.368	1725.0
16159	617.3298	28.91	31.06	88.111													3032																		13	TAAQAR		PEP_FRAG_1	298	303	b3b6∞y6	3	5.1204	5.1204	0.0016	1	6	617.3298	3032.0
16175	616.3686	46.75	48.0	91.5231	9459		8662	84675	81217	74427	62806	64167	61820	78176	72737	78407		57445	69814	83546	83454	85854	86483	91310	84175	90962	85617	87850	79212	75129	76722	84194	81129	85893	19	GLDALK		PEP_FRAG_1	850	855	b3b4b5b5∞y3y5y6	7	6.5037	6.5037	0.0011	1	4	616.368	89025.0
16212	616.3787	43.74	45.06	91.4948				10477	10462	7972	6631	6494		6778				5848	7695			11948				9312	9488	8927	10417	11016	9246	9626	10694	12256	5	AASIVR		PEP_FRAG_1	2	7	b3b6y6	3	4.9839	4.9839	0.0029	2	3	616.3788	7578.0
16219	617.3625	30.62	33.21	92.7883							3504	3993						2037																	8	GNISVK		PEP_FRAG_1	627	632	y4	1	5.653	5.653	0.0018	1	2	617.364	2208.0
16270	617.3638	48.4	49.24	92.1999	9576	8787	9498						6275	5963	5636								6444	6864	5518				5587		5479		4367		27	GNISVK		PEP_FRAG_1	627	632	y3∞	1	4.9878	5.653	0.0018	1	2	617.3621	3080.0
16287	617.3597	44.01	45.4	93.7061				3712	4276	4372		2214	4090		3414	2972	2298	2371	4790		4369	4324							2057	2326				4423	8	SIGAAAK		PEP_FRAG_1	47	53	b5∞y7	2	5.4886	5.5821	0.0019	1	2	617.3621	1257.0
16391	618.3123	29.17	28.31	85.403																														7847	30	ALNDVS		PEP_FRAG_1	297	302	b2b3b4b5	4	7.2094	7.2094	0.0005	1	5	618.3123	7847.0
16424	618.3424	35.22	37.73	91.753																6065															16	LGAMAR		PEP_FRAG_1	537	542	b3y6	2	5.6578	5.6578	0.0017	1	2	618.3424	6065.0
16442	618.3496	40.59	42.61	89.9751				4329	3784		3163	4192		4301	4870	4883	2301	2311		4939			10133	8710	9487	5083		4813	8764	8312	8063				19	TEAGIK		PEP_FRAG_1	890	895	y3y6	2	6.2439	6.2439	0.0013	1	2	618.3496	9563.0
16444	618.346	41.23	43.1	90.1145				3576			2508		3770		3128				3879	4839			4451	4855	4648	5391	5095	5122	3753	3840	3912				21	ADTIAK		PEP_FRAG_1	185	190	b4y2y6	3	6.1224	6.1224	0.0015	2	3	618.3456	3946.0
16461	618.3378	39.61	38.61	91.67	45956	43432	42257																												1	MAAAVR		PEP_FRAG_2	1	6	b3y1y6	3	4.9387	4.9387	0.0022	2	2	618.3378	15370.0
16476	618.3119	34.57	36.11	86.3686	5647		5153	6568	6642	7080	9699	9231	11257	3046				5385		8768	8451		9987	10178	9279	13873	13714	14202		4629	5453	4807		5486	24	ADDLGK		PEP_FRAG_1	124	129	b3b3∞b6y2y3y4y6	7	7.8958	7.8958	0.0000	10	11	618.3122	12758.0
16481	618.3078	52.53	54.24	94.5442									2237							2360			2895	2726	2559	3807		2787		1809	2090				9	ALNDVS		PEP_FRAG_1	297	302	b5*	1	5.4492	7.2094	0.0005	1	5	618.3076	2337.0
16502	619.3419	28.9	28.9	89.161						5976																									6	VTGTNK		PEP_FRAG_1	108	113	b2y4y5y6	4	6.4187	6.7654	0.0011	1	14	619.3419	5976.0
16505	618.3415	35.14	37.42	91.7492				6140	5891						5035	5328			6543				6851				6481		8057		8020				27	LGAMAR		PEP_FRAG_1	537	542	b3y6	2	5.5952	5.6578	0.0017	1	2	618.3409	4749.0
16510	618.3122	54.29	55.45	86.5703	5200	5336	4725	11630	10318	7745	11160	12039	8321	10649	8978	9051		8329	8981	10360	10338	8958	15535	15428	15443	15167	15234	11703	10998	11584	12045	11612	11991	12347	29	ALNDVS		PEP_FRAG_1	297	302	b5y6	2	6.6297	7.2094	0.0005	2	5	618.3126	9058.0
16531	619.3428	26.24	28.35	89.4452	4705		4112	11243	9052	16587	7254	6801	8225	4540	5880	5983		6406	10571	13286	14424	13799	18382	19682	17294	14451	13052	15255	11167	10165	10261	7859	8534	8200	20	VTGTNK		PEP_FRAG_1	108	113	b2b2∞b5b6y4y4*y5y6	8	6.7654	6.7654	0.0011	13	14	619.3432	16436.0
16540	618.3115	23.87	23.89	84.734																													1477		29	AEAAEK		PEP_FRAG_1	1293	1298	b3y6	2	5.8213	5.9799	0.0016	1	2	618.3115	1477.0
16563	619.3001	42.52	44.16	89.2692						2783				2427		4017	1935						5263	5282	4831			2959							10	GAVGCR	Carbamidomethyl C(5)	PEP_FRAG_1	51	56	b3b6y6	3	4.1816	4.3379	0.0032	1	2	619.2966	1049.0
16586	619.316	32.25	34.54	88.7066				2516	5197	3171							2339		2811	2689	3660		1677		2034	3546									22	VCVGGK	Carbamidomethyl C(2)	PEP_FRAG_1	393	398	y3	1	5.5959	5.9173	0.0016	1	2	619.323	2421.0
16726	618.3472	42.04	43.59	92.9268							13715	13829	15386	4162		6798		11147																	7	TEAGIK		PEP_FRAG_1	890	895	b4y1y2y4	4	5.8956	6.2439	0.0013	1	2	618.3481	8748.0
16973	620.3266	31.87	33.42	89.1237	18645	17079	17805	12550	12368	11338	9926	10384	6107		9447	10223		7630	10091	14545	10519			11958	14220	12521	12541	12300	9116	9807	10551	13878	13988	13322	24	ADTVSK		PEP_FRAG_1	210	215	b4y2y5y6	4	5.7792	5.7792	0.0016	2	2	620.326	10782.0
16998	620.3117	33.5	35.65	91.9867				12120	10896		9040	7825	8830	10746	13446	14052		8217	10988	15689	16086	13937	17687	17936	19187			13829	17380						25	MASPSK		PEP_FRAG_1	1	6	b6y2y3y3∞y6	5	5.5038	5.5038	0.0020	2	2	620.3126	11384.0
17317	624.2402	52.47	53.67	86.072													6099																		13	SSGWGM		PEP_FRAG_1	409	414	b4b5y3y6	4	6.0822	6.6085	0.0011	1	7	624.2402	6099.0
17359	624.2475	52.0	53.66	86.2655					3805	3851	2091	2116		5762	6803	6834		8174	7548	4336	3315	3144	4576	4240	4295	6343	6408	5781	3903	3634	3706				6	SSGWGM		PEP_FRAG_1	409	414	b3∞b4b5b6y6	5	6.6085	6.6085	0.0011	6	7	624.2474	9909.0
17422	624.4099	59.56	60.94	98.9794				2187	2014	2484	2010	2169		2965		3600			1679	2463		2495	4137	3718	3985		3777	3369	2996	2477	2858	3954	3947	3825	29	GILPPK		PEP_FRAG_1	18	23	y2y4y6	3	5.7032	5.7032	0.0017	3	3	624.4111	2547.0
17521	626.3644	38.84	40.71	93.667				21601	17175	22978	17535	17043	21510	19618	23347	23616		12276	22028	21968	29488	25904	25429	22683	22925	18487	17994	19976	18723	19266	16022				20	GVPTPR		PEP_FRAG_1	241	246	b6y2y4y6	4	6.2813	6.2813	0.0013	2	3	626.3647	23735.0
17529	626.3642	42.19	41.31	93.223	15015																											13109	13990	14892	29	GVPTPR		PEP_FRAG_1	241	246	b6y4∞	2	5.1555	6.2813	0.0013	1	3	626.3648	10587.0
17567	626.4258	47.33	46.65	96.1123																												16960	16328	19931	29	GVPLIK		PEP_FRAG_1	17	22	b3b4b5y2y4y6	6	8.1851	8.1851	0.0000	3	27	626.426	12567.0
17584	626.4238	44.44	46.15	96.7292				10755	10321	9543	8795	8900	7932	6941	8526	9655	7020	5593	6612	6788	5652	5249	9212	10431	9232	6513	6023	6308	7173	8075	7851				6	GVPLIK		PEP_FRAG_1	17	22	b3b4b5y2y3y4y6	7	7.8404	8.1851	0.0000	24	27	626.4251	27948.0
17600	626.4252	54.02	55.36	100.245					3657	2770	2607	2742							2400	6052	5162	5373	3197	3520	3232	1992	1753	1587	3146	3103	2763	4284	4517	4674	25	IPVGIK		PEP_FRAG_1	105	110	y3y6	2	5.1482	5.4671	0.0020	3	5	626.424	2011.0
17695	627.383	36.56	38.62	93.4296				5540	6249	6330	7408	8004			9598	10335	7360	6117		7452		6194	6143		6701	7012		6602	5948	5813	5560				8	VPNGLK		PEP_FRAG_1	306	311	b3b6y6	3	5.2438	6.0052	0.0015	1	4	627.3851	4824.0
17707	626.4249	38.8	40.51	100.404						1472													1513	1422	1265										19	LLVPGK		PEP_FRAG_1	25	30	b2y2y3	3	6.8014	6.8014	0.0011	4	5	626.4262	1194.0
17722	627.3495	46.05	47.35	96.5582						3216	3493	3209	3908	5289		5645		2840		3829				5431	5504	5062	5706		4753	4122	4245	7581	7614	6917	16	SGLHTL		PEP_FRAG_1	888	893	y3y6	2	5.1024	5.4889	0.0020	1	8	627.3504	3396.0
17759	627.3842	38.95	40.51	89.208				1582		2229												2233					1915	3387							23	VPNGLK		PEP_FRAG_1	306	311	y5y6	2	6.0052	6.0052	0.0015	2	4	627.3845	1232.0
17761	627.3865	38.61	40.29	36.178																	1739														17	VPNGLK		PEP_FRAG_1	306	311	y2y4y5	3	5.8109	6.0052	0.0015	1	4	627.3865	1739.0
17769	628.4147	39.09	40.73	98.884																	2764														17	VVAALR		PEP_FRAG_1	180	185	b2b3y6	3	5.1413	5.9292	0.0016	1	6	628.4147	2764.0
17835	628.3661	32.01	32.03	88.4258	4964	5452	4778			5206																				1885	6133	3571	4442	4093	6	ADVVPK		PEP_FRAG_1	68	73	b5y3	2	6.1841	6.1841	0.0013	3	3	628.3662	12925.0
17841	628.4051	61.96	61.82	95.6423																												24273	24442	28929	29	VGLVLQ		PEP_FRAG_1	491	496	b3b4y1y2	4	7.4894	7.5224	0.0001	3	20	628.4047	19287.0
17862	628.4047	54.86	56.34	98.3345				3419	3349	3155	3187	2978		3383	3941	4024		3548	4557	4024	3711	3300	2389	2867	2468	4384	4721	3940	3650	3479	3406	4228		4357	17	VGLVLQ		PEP_FRAG_1	491	496	b3b4	2	6.3529	7.5224	0.0001	1	20	628.4027	5781.0
17876	628.4406	40.24	39.55	96.855																												2610			28	VLVAVK		PEP_FRAG_1	6	11	b2b3b4y2y6	5	6.648	7.6671	0.0000	1	8	628.4406	2610.0
17881	628.4415	36.62	38.9	97.136					4769									8620		7015			6800	6181			6095		4965	5652					14	VLVAVK		PEP_FRAG_1	6	11	b2b3b4y2y3y4y6	7	7.6671	7.6671	0.0000	4	8	628.4414	4463.0
17882	628.4334	52.0	53.23	95.3													1758																		13	VLVAVK		PEP_FRAG_1	6	11	b4	1	5.3851	7.6671	0.0000	1	8	628.4334	1758.0
17889	628.4416	58.77	58.49	99.615			5258																												3	ALLALK		PEP_FRAG_1	28	33	b2b3b4y2y3y6	6	6.0264	6.9518	0.0008	1	10	628.4416	5258.0
17893	628.404	59.8	61.38	95.9678				26841	24083	20163	20760	19639		25479	25595	26018		26362	20222				23023			32884	28909	25249	22092	20866					11	VGLVLQ		PEP_FRAG_1	491	496	b3b4y1y2y2*y3y3*	7	7.5224	7.5224	0.0001	16	20	628.4045	27878.0
17899	627.3484	53.97	54.64	92.8675						2312			2253						1918			2492			1516									1768	9	SGLHTL		PEP_FRAG_2	888	893	b3y6	2	4.6076	5.4889	0.0020	3	8	627.3496	2364.0
17909	628.4157	39.12	41.09	97.8945				2595	2707	2820	2597	3539											3620	3634	3491	2788	2993	4316	2498		2521				20	VVAALR		PEP_FRAG_1	180	185	b3y6	2	5.9292	5.9292	0.0016	5	6	628.4155	2987.0
17981	628.4413	52.04	53.36	95.547				3317	2776	3783			3340		1703	1886				3011			2933	3062	3151	3233		3433	2275	2295	2450	5154	5257	5501	6	VLVAVK		PEP_FRAG_1	6	11	b4y4y6	3	6.6892	7.6671	0.0000	2	8	628.4415	9676.0
18003	629.3755	42.01	41.16	92.0432	105965	111106	125091																									126347	127482	125265	1	NVIGAR		PEP_FRAG_1	51	56	b3b6*y1y3y5y6	6	7.5209	8.372	0.0000	1	2	629.376	40105.0
18034	629.3985	34.6	34.6	90.804						2701																									6	IQLGAK		PEP_FRAG_1	95	100	b6*y3y6	3	6.2119	6.2119	0.0013	1	2	629.3985	2701.0
18035	629.3751	38.77	40.65	92.5407				126775	118347	143968	112108	113080	118842	122490	114523	115621		96869	157518	97151	154902	134864	127523	117175	117303	127165	130262	148625	106243	105976	109370				20	NVIGAR		PEP_FRAG_1	51	56	b3b5b6*y1y3y5	6	8.372	8.372	0.0000	1	2	629.3763	131278.0
18046	629.4005	37.15	39.06	97.6954				5077	4745	2380	6570	6821	6953	4099	7968	8661		5894	6039	5036	4208		5285	5437	4898		4911	5303	3190	2976					17	AQVAIK		PEP_FRAG_1	923	928	y3y6	2	6.162	6.162	0.0014	2	4	629.3997	5753.0
18056	629.3997	41.27	42.77	94.5243				27115	23234	18701	16915	19111	17086	30137	29416	28657		13964	17659	20352	21078	18606	21978	22917	22469	21490	21126	19539	24231	20995	21222	24220	25392	26276	17	AGLLQK		PEP_FRAG_1	340	345	b3b5b6*y3y3*y4y4*y5y6	9	6.8267	6.8267	0.0011	7	7	629.3985	38840.0
18094	629.4002	43.75	45.49	92.8777				103751	100502	99025	97311	97041	83389	62936	63061	59923		62671	84537	103951	110043	103906	95921	106566	98622	106420	114364	109294	97559	96588	103231				9	LAALGGK		PEP_FRAG_1	54	60	b4b6b7y3y6y7	6	6.9557	6.9557	0.0008	6	6	629.3988	128464.0
18126	630.3491	26.35	25.56	90.5888		12710	14682																									9257	7213	9566	29	GSEIPK		PEP_FRAG_2	264	269	b3y3y6	3	6.5553	6.5553	0.0011	2	3	630.3519	5588.0
18130	630.385	29.79	28.92	94.187																														3127	30	GEIIAK		PEP_FRAG_1	383	388	b3b4y2y3	4	7.3055	7.3055	0.0005	1	3	630.385	3127.0
18131	630.3834	29.8	28.74	93.981																													2691		29	AEVIAK		PEP_FRAG_1	913	918	b3	1	5.9675	6.7864	0.0011	1	3	630.3834	2691.0
18133	630.384	28.36	27.39	93.528	13156	15181	14311																											4165	30	GVIVDK		PEP_FRAG_1	227	232	b3y3y4y6	4	7.5578	7.5578	0.0000	4	6	630.3826	2922.0
18181	630.3241	29.94	29.81	89.968									1665																						9	SAPGGGGK		PEP_FRAG_1	198	205	b5y8	2	4.9203	4.9203	0.0029	1	2	630.3241	1665.0
18218	630.2889	33.1	35.18	93.2689				3592	3201	2887	2152		2944				2629	2497		8038	6832	7451		5322		1990	2009	2206	5239	4291	5340				6	DPADGR		PEP_FRAG_1	739	744	y5∞y6	2	5.4923	5.4923	0.0023	2	2	630.2882	5510.0
18224	630.386	38.4	37.49	98.3166		17104	17822																									19076	19399	19109	30	EILAGK		PEP_FRAG_1	1178	1183	b2b3y3y4	4	7.1299	7.1299	0.0006	1	3	630.386	14643.0
18229	630.3933	58.24	59.58	95.7822						2634	2469														1736			2151							7	ASAILR		PEP_FRAG_1	114	119	y5∞y6	2	5.8434	5.8434	0.0016	2	2	630.3925	1382.0
18259	630.3596	50.26	51.64	93.7806				10791	11438	10798	11832	12034	11195		8660	8095		8046	8772	17179	16632	14479	18113	16785	16928	16370	16006	16110	18420	18228	17391	10594	11347	11704	29	VDIAGR		PEP_FRAG_1	183	188	b3∞y4y6	3	5.8834	5.8834	0.0016	1	2	630.3597	8548.0
18261	630.4205	38.38	37.45	96.316		9435																													2	GTVLIK		PEP_FRAG_1	255	260	b3b3∞b4y1y2y3y6	7	7.57	8.7628	0.0000	1	5	630.4205	9435.0
18269	630.4114	43.9	45.28	97.261													13643																		13	GLVTLK		PEP_FRAG_1	163	168	b4b4∞b5∞y3y4y6	6	6.4049	8.259	0.0000	1	22	630.4114	13643.0
18273	630.4192	46.58	45.97	96.566																												23235	22719	24733	30	GLVTLK		PEP_FRAG_1	163	168	b2b4b4∞y1y3y4	6	7.6234	8.259	0.0000	3	22	630.42	19269.0
18290	630.4201	48.08	48.24	97.2269	20391	18025	20539			2221			1426			1393			2764			2029					1855					11903	12178	13891	18	GVLTLK		PEP_FRAG_1	64	69	y3∞	1	6.4573	7.2803	0.0005	1	3	630.4186	2283.0
18302	630.4204	70.93	72.27	99.2932				5159	4986	4184	4252	3540	3354	3684	4707	5043			2690	3939	3941	3538	4552	4356	4237	4642	4493	5121	4015	3764	3836	6252	6147	6841	24	IGLSLK		PEP_FRAG_1	666	671	b4y3y6	3	5.2126	6.4129	0.0013	2	4	630.4201	2999.0
18303	630.4207	38.16	37.11	96.3314	30866		32797																									97693	92309	103898	28	GTVLIK		PEP_FRAG_1	255	260	b2b3b3∞b4b4∞b5b5∞y1y2y3y4y5y6	13	8.7628	8.7628	0.0000	3	5	630.4212	82966.0
18360	630.3852	60.42	61.82	98.7566				1965		2270					2220	2218				2855	3412	3479	2031	2068						2017	1973		2052		17	EILAGK		PEP_FRAG_1	1178	1183	b2y3y4	3	5.8286	7.1299	0.0006	1	3	630.3844	5101.0
18373	631.3796	35.61	36.9	95.5215	4237					4361														4635			6782	5537			1913				1	SGINLK		PEP_FRAG_1	35	40	b3b3∞y6	3	5.2098	5.2098	0.0022	1	2	631.3787	1024.0
18376	631.3805	37.84	36.48	94.98		1056																													2	SGINLK		PEP_FRAG_1	35	40	b3b3∞b6y1y6	5	5.0902	5.2098	0.0022	1	2	631.3805	1056.0
18425	631.3547	26.74	28.99	91.2984				9274	10197	15324	9076	8110	5540	6161	9928	9511		20044	20111	16163	7946	4562	10856	13602	11354	13306	13233	15120	8055	11336	13052		11413	12195	11	AANLSR		PEP_FRAG_1	2	7	b3y5∞y6y6*	4	7.041	7.041	0.0006	4	4	631.3546	10683.0
18428	630.4176	32.84	34.58	96.8727						4662																3398					5059				6	LLAVSK		PEP_FRAG_2	602	607	b2b3y2y2∞y3y3∞y4y4∞y6	9	7.3533	7.8954	0.0000	2	5	630.4163	11651.0
18440	630.4176	36.05	35.24	96.805																												11354	13530	13534	29	LLAVSK		PEP_FRAG_2	602	607	b2b3y2y2∞y3y4y5y6	8	7.8954	7.8954	0.0000	3	5	630.4177	10217.0
18449	630.4186	54.28	55.72	97.3156					6619	5907	6507	5907		2324		3045		6677	9557	7026	9741	8360	6037	6113	5792	7959	6742	6478	5121	5458	5916		4354	4716	21	GVLTLK		PEP_FRAG_1	64	69	y3y6	2	7.0049	7.2803	0.0005	1	3	630.4186	4722.0
18498	632.4005	33.09	32.29	97.3203																												7943	8387	9198	30	AITSLK		PEP_FRAG_1	247	252	b2b4b4∞y1y3y4y6	7	7.9384	7.9384	0.0000	3	3	632.4	6815.0
18588	632.3727	36.15	38.07	93.2359					11120	13236	8484		9263	6378	7318	7581				5124		5569	12609	13641	12796				7284	6328	6296				6	ASSVLR		PEP_FRAG_1	1022	1027	b4b4∞b6y3y6	5	6.1098	6.1098	0.0015	3	3	632.374	37666.0
18596	632.3742	46.62	47.8	93.7102	71039	72532	91265	20066	21676	15096	96591	96488	100198	19612	21956	22463		38544	43879	15226	15831	17678	27594	28491	28726	35689	35556	35821	59167	52102	56149	68856	64675	64836	19	SSLAVR		PEP_FRAG_1	2	7	b3b3∞b5b5∞b6y6	6	5.2839	5.2839	0.0026	2	2	632.3743	26891.0
18665	632.3625	31.41	33.61	93.4999					6217	5730	7272	7550	6046		3901			9866	15604	13532	11722	12821	13210	12697	15587	14316	12173	13372							22	AEATLK		PEP_FRAG_1	419	424	b3b6y3y6	4	6.263	6.263	0.0013	2	3	632.3619	12470.0
18879	634.3081	25.55	25.07	89.074			8925																									11563	11794	9668	29	TEGAEK		PEP_FRAG_1	69	74	b4b5y2y4y4∞y5	6	8.411	8.8036	0.0000	3	15	634.3077	9781.0
18949	634.3875	42.32	43.77	96.705													61835																		13	VFGALK		PEP_FRAG_1	159	164	b4b5y3y4y5y6	6	7.9201	8.8646	0.0000	1	29	634.3875	61835.0
18956	634.3081	34.2	36.29	89.2916				3601	3720									2336		9594	8121	6769	7110	7457	6992	4273		4388		4728	5662		5090		19	TEGAEK		PEP_FRAG_1	69	74	b4y3y4y4∞y6	5	7.8333	8.8036	0.0000	2	15	634.3073	6519.0
18959	634.394	50.86	50.19	98.7885	10137	9688	11650																									3850	3694	3833	1	VFGALK		PEP_FRAG_1	159	164	b2y4y6	3	6.2241	8.8646	0.0000	1	29	634.3956	2511.0
18960	634.3947	42.06	43.84	96.7754				48992	43276	30950	45379	45252	36259	40042	48866	51883		62575	75406	58211	49874	44454	56836	60472	56949	55418	55582	51153	38087	34264	36612				20	VFGALK		PEP_FRAG_1	159	164	b2b3b4b5y1y2y3y4y5y6	10	8.8646	8.8646	0.0000	23	29	634.3948	65015.0
18963	634.3255	52.46	53.62	92.0222	31904	28703	25918	81842	75378	59413	53085	55440	61980	81144	70684	68271		58116	86719	75978	98642	86944	78547	94551	79168	104023	99953	92728	114881	102363	94388	99771	111672	99906	28	VADAMK		PEP_FRAG_1	367	372	b3b3∞b4b4∞b5b5∞b6b6∞y1y2y6	11	6.4197	6.4197	0.0013	1	2	634.3258	84807.0
18988	634.3026	26.69	29.04	89.2441				23319	26713	22633	32669	15935		9505	15897	19870	8982	23425	13338	34212	18489		16569	30920	13516	29017	30014	29919		6975	10636	13380	14468	12645	21	TEGAEK		PEP_FRAG_1	69	74	b2b4b5b6y2∞y4y4∞y5y6	9	8.8036	8.8036	0.0000	10	15	634.3065	13705.0
19037	635.2705	35.09	36.99	87.567				3961	3542	3540		3044	4218	2577	4134	3902			2651	3985		3597	4061	3963	4111	3705	3359	3450	3614	3211	2701		3538		18	AFADDP		PEP_FRAG_1	1127	1132	b2b5	2	6.3474	6.3474	0.0013	5	6	635.2679	4069.0
19047	635.2685	38.52	40.22	90.984																	3462														17	AFADDP		PEP_FRAG_1	1127	1132	b3y6	2	5.3952	6.3474	0.0013	1	6	635.2685	3462.0
19231	636.3375	42.13	41.72	93.5188		26470	23848														2168											66302	75912	74249	28	GFGDLK		PEP_FRAG_1	2	7	b2b3b4b4∞b5b6y1y2y3y3∞y4y4∞y5y6	14	8.8677	9.0177	0.0000	4	28	636.3372	55581.0
19232	636.3367	42.62	41.35	94.149	8639																														1	GFGDLK		PEP_FRAG_1	2	7	b4y4y5y6	4	7.1566	9.0177	0.0000	1	28	636.3367	8639.0
19241	636.3324	40.37	42.48	93.2091							1785				2944	2188				2185			1980	2092	2151	2240		1620							22	GGFDIK		PEP_FRAG_2	540	545	b3y6	2	4.5585	6.6884	0.0011	2	4	636.3299	1468.0
19243	636.3384	31.79	33.7	93.2324				4060	7294	6947	8642	9377			3415	3829				3202		1929	3367	3647	5097	5485	5614	4908	2940		7006	4002	3855	3649	25	GGFDIK		PEP_FRAG_1	540	545	y3∞y6	2	5.3674	6.6884	0.0011	1	4	636.3406	1757.0
19245	634.3942	45.51	44.61	96.0522	4651	4552	4526																									30919	31083	38294	28	VFGALK		PEP_FRAG_1	159	164	b3b4y3y4y5y6	6	8.5821	8.8646	0.0000	4	29	634.3945	25235.0
19277	636.3311	39.22	40.74	93.945													84934																		13	GFGDLK		PEP_FRAG_1	2	7	b4b4∞b6y3y4y4∞y6	7	7.6603	9.0177	0.0000	1	28	636.3311	84934.0
19296	636.3723	34.6	33.73	95.0473																												9330	8293	9345	30	GGYVIK		PEP_FRAG_1	531	536	b3b4y3y6	4	6.5894	6.5894	0.0011	3	5	636.3714	6822.0
19297	636.3728	40.7	39.89	94.266																												25196	26915	28662	29	ATGFLK		PEP_FRAG_1	98	103	b3∞b4b4∞b6y1y2y3y4y5y6	10	8.3349	8.3349	0.0000	3	8	636.3728	21040.0
19303	636.3734	36.64	38.84	94.611																											4595				27	ATGFLK		PEP_FRAG_1	98	103	b4y2y4y6	4	7.6285	8.3349	0.0000	1	8	636.3734	4595.0
19306	636.3737	44.65	46.57	96.404																										2299					26	AATFVK		PEP_FRAG_1	98	103	y1y3	2	5.3997	5.3997	0.0020	1	4	636.3737	2299.0
19309	636.3704	39.01	39.01	94.348						10309																									6	ATGFLK		PEP_FRAG_1	98	103	b3b4y3y4y5y6	6	7.7493	8.3349	0.0000	1	8	636.3704	10309.0
19317	636.3704	65.6	66.2	97.499																	1214														17	ATGFLK		PEP_FRAG_1	98	103	b4∞b6	2	6.1363	8.3349	0.0000	1	8	636.3704	1214.0
19327	636.371	47.18	46.32	95.776	2347																														1	AATFVK		PEP_FRAG_1	98	103	b4	1	5.0163	5.3997	0.0020	1	4	636.371	2347.0
19342	637.3078	35.35	37.54	89.2377																						11647	10550	12125							24	GGFGGSR		PEP_FRAG_1	226	232	y5	1	6.4624	6.5229	0.0011	3	5	637.3077	10624.0
19356	636.3712	40.25	42.08	97.9385						2220										1747	3080	2779	1481			1833	1815		1657						25	ATGFLK		PEP_FRAG_1	98	103	b3	1	6.5798	8.3349	0.0000	2	8	636.3731	1029.0
19372	637.3326	29.84	31.53	95.1563							1792	1859	2820																						7	GAQFSK		PEP_FRAG_1	2	7	b3*y6	2	6.3235	6.4845	0.0011	1	4	637.3331	1002.0
19408	636.371	54.98	56.3	94.5374								4870	4929	5096	6187			4360																	14	AATFVK		PEP_FRAG_1	98	103	b3∞y6	2	4.5782	5.3997	0.0020	1	4	636.3705	2127.0
19481	636.3737	62.2	63.27	98.543						1810	4865	4425	5188	2228		3126																			6	GGYVIK		PEP_FRAG_1	531	536	y3y6	2	5.7064	6.5894	0.0011	1	5	636.3722	2431.0
19582	638.4257	49.22	48.46	100.153	10238	9969	10963																									12303	13200	13241	28	IPPAIK		PEP_FRAG_1	60	65	b2y4y6	3	5.755	6.7705	0.0011	1	11	638.4253	9646.0
19664	639.3138	36.18	38.15	93.5993				2582	2850	3756	2274	2075	3418		2659	2892			4459	4747	5355		4285	3835	3807	4238	3618	3945	2420	2603	2412				23	SGFNSK		PEP_FRAG_1	171	176	y5∞y6	2	5.7518	6.5306	0.0011	2	4	639.3136	2325.0
19676	638.3522	45.84	47.53	92.4454				4914	4871	4172	3666	3333		3580	4575	4558		4423	5889	7236	6876	7404	7425	6700	6979	5871	5936	5618	4325	3613	4046			3131	6	GTGYIK		PEP_FRAG_1	698	703	b3b4y3y6	4	6.2444	6.2444	0.0013	14	14	638.3505	11035.0
19677	639.3831	52.34	51.81	95.239																												6271	6762	7233	30	THGLLV		PEP_FRAG_1	198	203	b2b3b4y6	4	6.7858	7.7708	0.0000	3	21	639.3829	5000.0
19678	639.3836	49.59	51.26	95.7792				11997	11480	8184	9706	9889	8060	6241	8755	10760				3988	4263		12318	11880	11360	5280	5232	4908	5716	5804	6247				9	THGLLV		PEP_FRAG_1	198	203	b2b3b3∞b4b5b5∞b6y5y6	9	7.7708	7.7708	0.0000	18	21	639.3835	12841.0
19698	638.426	46.07	47.77	100.372				11531	11285	9066	10052	8723	8414	8041	7782	8374		15551	17356	13370	12563	13373	14106	14923	13762	14986	14381	13553	12677	11657	12760				6	IPPAIK		PEP_FRAG_1	60	65	b2b3b4b5y3y6	6	6.7705	6.7705	0.0011	10	11	638.4258	26555.0
19717	640.3162	45.62	46.96	95.617													21749																		13	GGFGFR		PEP_FRAG_1	124	129	b4y6	2	6.1266	7.898	0.0000	1	18	640.3162	21749.0
19783	640.4125	63.38	63.39	96.319									1264																						9	AAPILR		PEP_FRAG_1	2	7	b3b4y2y6	4	5.1574	5.1574	0.0028	1	3	640.4125	1264.0
19811	640.4128	62.69	63.43	95.928																	1618														17	AAPILR		PEP_FRAG_1	2	7	y3y6	2	5.1086	5.1574	0.0028	1	3	640.4128	1618.0
19893	641.3942	36.7	38.37	96.977													43677																		13	LPNLGK		PEP_FRAG_1	299	304	b3b4b5b6y3y4y5y5*y6y6*	10	8.718	9.1849	0.0000	1	21	641.3942	43677.0
19897	641.4	39.61	39.25	36.6418	6915	6391	6576														2133											55771			28	LPNLGK		PEP_FRAG_1	299	304	b2b3b4b5b6y2y3y4y4*y5y5*y6*	12	8.9826	9.1849	0.0000	1	21	641.3994	46457.0
19898	641.3992	40.0	39.14	96.412																														47286	30	LPNLGK		PEP_FRAG_1	299	304	b2b3b4b5b6y2y3y4y4*y5y5*y6*	12	8.6772	9.1849	0.0000	1	21	641.3992	47286.0
19925	641.3733	47.34	48.96	94.1156				15298	14210	12977	10096	9924	10507		2264			8311	10532	19025	20488	20507	12636	12455		7241	7171	7396		13267	12705				6	QPLGAR		PEP_FRAG_1	445	450	b3b5y3y6	4	6.1195	6.1195	0.0016	3	4	641.3745	38435.0
19930	642.3259	38.08	39.94	95.8748				4082	4269	3905	8716	7136	6453			3793	52975	44810	62767	96476	108689	94505	13618	13257	13313	24468	23039	23469	21917	21311	21158				9	FSGFGK		PEP_FRAG_1	37	42	b5y5y6	3	6.2816	6.4347	0.0013	1	3	642.3238	7616.0
19953	641.4	59.41	60.84	97.0628				11489	9619	8281	9771	10508	7632					14607	12571	10601	6452	8410	11721	10516	11767			10035		11102					16	GPLLNK		PEP_FRAG_1	1204	1209	b3b5y3	3	6.0581	6.0581	0.0015	2	2	641.4019	11605.0
19964	642.3286	41.36	40.63	95.2673																												4671	4417	5028	30	FSGFGK		PEP_FRAG_1	37	42	y5y6	2	6.4347	6.4347	0.0013	1	3	642.3278	3256.0
19994	641.4004	36.38	38.44	97.1854					80924		116951	106211	67057		40745	40744		77307	54101	98499	94761	45999	93570		86322	87475	84530	87584	65836	69266	66869				16	LPNLGK		PEP_FRAG_1	299	304	b2b3b3*b4b5b6y2y3y4y4*y5y5*y6*	13	9.1849	9.1849	0.0000	18	21	641.401	137390.0
20052	642.4569	39.55	41.42	101.241				5041	4575	3645	6983	6043	4110	5115	5916	6376		7533		6349		5741	4738	5189	4792	5677	5435	5418	10052	8645	9842				25	LVIVAK		PEP_FRAG_1	162	167	b2b3y2y4y6	5	6.9957	6.9957	0.0007	11	12	642.4574	6745.0
20071	642.4507	39.79	41.32	100.876													7253																		13	LVIVAK		PEP_FRAG_1	162	167	b3b4y4y6	4	5.3704	6.9957	0.0007	1	12	642.4507	7253.0
20105	640.3232	45.32	47.02	95.7672				28642	26069	22867	30700	30028	35694	22819	25542	28773		21203	27576	32114	33652	32407	29395	32242	31107	25484	25558	24321	37862	36195	37226				6	GGFGFR		PEP_FRAG_1	124	129	b3b4b5b6y3y4	6	7.898	7.898	0.0000	15	18	640.3227	68316.0
20117	643.3901	38.85	40.72	96.0337				134918	117579	153049	120905	121013	131247	135746	142841	142717		90222	145984	137532	186242	162967	167393	152262	160221	123834	128593	151232	120152	126248	113938				11	GANILR		PEP_FRAG_1	492	497	b3b3*b4b4*b5b5*b6y2y3y6	10	6.76	6.76	0.0011	5	7	643.3909	181119.0
20119	643.391	42.18	41.31	95.399	78823																											88368	93252	98017	28	GANILR		PEP_FRAG_1	492	497	b3b3*b4b4*b5y1y2y3y6y6*	10	6.6438	6.76	0.0011	2	7	643.3907	74662.0
20147	643.4154	35.35	34.43	98.7213	16292	17248	8435																												1	AQIALK		PEP_FRAG_1	165	170	b2b3b4y2y3y4	6	7.4654	8.3579	0.0000	1	3	643.4144	4261.0
20148	643.4156	35.1	34.15	98.334																												20447	20986	21336	28	AQIALK		PEP_FRAG_1	165	170	b2b2*b3b4y2y3y4y5*	8	8.3579	8.3579	0.0000	2	3	643.4155	16456.0
20257	644.3748	29.89	32.61	99.4687												1309							1302		1577										21	AAAAAAAK		PEP_FRAG_1	407	414	b6y8	2	5.3601	5.7744	0.0016	1	3	644.375	1303.0
20274	644.3983	39.36	38.45	96.651																														2604	30	ILGVDK		PEP_FRAG_1	385	390	b3y4	2	6.3652	6.8463	0.0011	1	2	644.3983	2604.0
20275	644.4003	39.39	38.47	97.01																													1799		29	ILGVDK		PEP_FRAG_1	385	390	y4y6	2	6.8463	6.8463	0.0011	1	2	644.4003	1799.0
20284	644.3684	34.31	36.1	100.597													276746																		13	LDGAIR		PEP_FRAG_1	253	258	b3b3∞b4b5b6y4y5y6	8	7.8648	7.8648	0.0000	1	3	644.3684	276746.0
20292	644.3765	39.91	41.5	96.1575							7425	7094	6890	5991		7243		8052																	9	NGGVGIK		PEP_FRAG_1	96	102	b4b4*y7	3	5.7942	6.8617	0.0011	1	3	644.3738	8728.0
20293	644.3707	39.96	41.48	96.081													5943																		13	NGGVGIK		PEP_FRAG_1	96	102	b4y7	2	5.483	6.8617	0.0011	1	3	644.3707	5943.0
20322	644.3738	45.27	46.31	93.227										7932	8149	8334													7583	7365	8185	5883	5427	6032	28	AAAAAAAK		PEP_FRAG_1	407	414	y5y8	2	5.7744	5.7744	0.0016	1	3	644.3735	4143.0
20330	644.3747	54.41	54.07	95.636																												2383	2062	2273	28	DLALGR		PEP_FRAG_1	105	110	b3y6	2	4.9131	5.182	0.0028	1	2	644.3751	1592.0
20331	644.4093	33.6	35.57	94.9958				9937	9749	13637	7165	6142	12742	11843	13230	14277		6473		11560		16252	12183	11051	12065	4373	4273	4917	8975	8019	8703	6858			12	VLVASR		PEP_FRAG_2	6	11	b6y1y3	3	6.686	6.7378	0.0011	3	4	644.4122	15956.0
20337	644.375	42.19	43.48	97.1556	18742		16984	12927	10898	8114	9739	10028	6939	16164	15942	16585		21635	29217	18677	13048	12626	14646	15022	8875	15537	16343	14537	15744	13867	16025	5082	4900	10162	17	AAAAAAAK		PEP_FRAG_1	407	414	b3y4y8	3	5.7616	5.7744	0.0016	1	3	644.3742	23451.0
20344	644.3741	48.65	50.13	94.2841					3826	4374	3324	3300	4304	3685	4688	4895		2525	4282	3885	4187		5037		4983	5251	5060	5121			4172			5137	5	DLALGR		PEP_FRAG_1	105	110	y5y6	2	5.182	5.182	0.0028	1	2	644.3749	2429.0
20359	644.3729	55.8	57.7	36.8886											1727	1763				2145				1455						2724					11	LDGAIR		PEP_FRAG_1	253	258	y4y5	2	7.2896	7.8648	0.0000	2	3	644.3726	1330.0
20369	644.3632	66.92	68.49	93.0018												2891						2735				4273	4305	3558							23	NLDGLL		PEP_FRAG_1	664	669	b4	1	5.4516	5.5653	0.0019	3	6	644.364	2570.0
20384	644.4344	45.93	45.89	100.752																		1833										4129	4668	5846	28	ILTLGK		PEP_FRAG_1	395	400	b2b3y2y3y4y5y6	7	7.8021	8.1119	0.0000	3	14	644.4343	2748.0
20393	644.4359	43.33	45.07	101.303				6040	4266	3601	3954	3901	4204	3823	5215	5064		8925	10287	8121	5291	5737	8076	8431	6757	4471	4322	5775	2160	2290					19	ILTLGK		PEP_FRAG_1	395	400	b2b3b3∞y2y3y4y5	7	8.1119	8.1119	0.0000	10	14	644.436	7386.0
20406	644.3618	73.55	73.55	90.852						1120																									6	NLDGLL		PEP_FRAG_1	664	669	b4b5	2	5.5653	5.5653	0.0019	1	6	644.3618	1120.0
20414	644.4298	53.32	54.51	99.791													556385																		13	GLLLTK		PEP_FRAG_1	630	635	b4b5b5∞b6b6∞y3y3∞y4y4∞y5y5∞y6	12	6.9341	7.9215	0.0000	1	15	644.4298	556385.0
20415	644.436	53.47	54.48	37.499															28465																15	GILTLK		PEP_FRAG_1	63	68	b2y1y2y3y4y4∞	6	8.6804	9.58	0.0000	1	19	644.436	28465.0
20425	644.4338	52.17	53.77	100.198				6769	6264	5537	5701	5247	4054			2859		10394	11104	8140	7146		5562	5649	5460	8014	8045	7733	5359		5736				17	ALSLLK		PEP_FRAG_1	362	367	b3∞b4b4∞y4y6	5	6.7873	6.7873	0.0011	5	7	644.4331	13021.0
20437	645.3218	25.83	25.24	88.942	6765	6939																										8762	11357	10017	30	SLSGPGQ		PEP_FRAG_1	172	178	b7y3y4y5y5∞	5	7.3019	7.3019	0.0005	5	7	645.3216	8411.0
20445	644.3749	42.93	44.21	96.2028	9901	9586	9382	9501	9426		8863	8616		10162	9739	10201		9936	16452	12046	15733		11210	10623	10686	10255	10032	10259	9336	8958		10418	10432	11485	29	NGGVGIK		PEP_FRAG_1	96	102	y3y7y7*	3	6.8617	6.8617	0.0011	1	3	644.3754	7725.0
20502	645.3933	40.97	43.19	91.536																1763						3787	3906								16	TQVLGK		PEP_FRAG_1	327	332	b3y6	2	5.0258	6.2061	0.0013	1	2	645.394	1544.0
20506	645.3677	31.6	32.99	93.1105	16000	13916	13516	10919		11941			7435		9483	9509		11204		12173			14692	15911	16182	9669	9094	10065	7520	8371	9121	7058	7637	6813	14	NVLGSR		PEP_FRAG_1	588	593	b3*y6	2	5.9358	5.9358	0.0015	5	7	645.3696	6128.0
20513	644.4073	34.91	37.18	37.7403											2130			2703					1886	1805	2286	2402		3103		2179	1979				26	LGVTVR		PEP_FRAG_1	389	394	y3y5	2	6.9047	7.1226	0.0006	2	5	644.4082	1249.0
20551	645.3587	39.89	41.42	88.946				19958	18531	13767	11668	12756	11913	17169	14363	14510		24874	32112	18733	19149	20642	25299	26297	24809	24057	22349	20084	20828	21171	19722	12912	12982	14755	9	AGEGALK		PEP_FRAG_1	629	635	b3b4b5b5∞b6∞b7y2y6y7	9	5.9522	5.9522	0.0016	2	2	645.3574	16067.0
20588	645.3951	57.08	58.21	96.6275	28224	22622	26390	58975	54662	55156	52837	59060	44935	63691	73641	75412		72860	96389	66728	53178	54886	72010	70184	75202	63667	57085	53741	53433	50772	52943	60956	53340	63338	28	TQVLGK		PEP_FRAG_1	327	332	b3b3∞b4b4∞b5y2y3y6	8	6.2061	6.2061	0.0013	1	2	645.3942	51374.0
20611	646.3006	42.75	44.16	90.658													4739																		13	NIGLDD		PEP_FRAG_1	364	369	b3	1	5.1614	7.4235	0.0003	1	24	646.3006	4739.0
20639	645.3942	45.42	46.77	96.2852	17453	15418	16902	3227	24102	2914	2384	24312						24112	22749	36826	36069		39027	42383	42001	28993	28551		21250	21313	23177		26868	29521	30	NASLLK		PEP_FRAG_1	161	166	b2b3b3∞b4b4*b4∞b5b5∞b6y2y3y4y6y6*	14	6.8519	6.8519	0.0011	7	7	645.3948	23229.0
20651	645.3739	61.75	63.38	38.3868				9455	16032					12753	15047	15765		6102	6421							8878	8562	8416	6820	8625	8616				12	WAGIAK		PEP_FRAG_1	278	283	y4	1	5.2454	5.2454	0.0026	1	2	645.3758	16252.0
20671	646.412	35.87	37.57	96.1666				17500	16957	12342	11981	10741	10651	10519	10483	11028	8028	9363	13740	18191	18411	14260	19219	20503	18807	15184	13654	13539	14295	10403	13530	16665	17476	18322	6	ISSLVK		PEP_FRAG_1	218	223	b3b4∞b5y3y5y6	6	6.1585	6.4374	0.0013	1	4	646.4122	34931.0
20691	646.3788	31.85	33.41	93.5364	61159	64884	66746	49523	44986	45266	39450	40972	32782	36508	50862	50978		30892		55299			45991	54494	44026	52312	48151	47235	35602	36657	39262	61459	59772	63684	23	ESALVK		PEP_FRAG_1	537	542	b4b4∞b5b6y6	5	6.2296	6.2296	0.0013	2	2	646.3799	41279.0
20696	646.3761	42.41	43.67	93.8525	4884			2796		2769		3174	3705					3804							3748	5424	5959	5722							22	LSTIVN		PEP_FRAG_1	301	306	b3b3∞b4∞y4	4	5.544	5.9205	0.0015	2	7	646.3786	3719.0
20716	646.3425	46.32	47.76	89.4358					19548				14411																22909		22855				25	VGDLDK		PEP_FRAG_1	420	425	b5y4y4∞y5y6	5	5.7131	6.1423	0.0014	1	2	646.3437	15818.0
20717	646.3428	48.6	48.06	88.7587																												29724	30595	31795	29	VGDLDK		PEP_FRAG_1	420	425	b3b5y4y4∞y5y6	6	6.1423	6.1423	0.0014	1	2	646.3436	24373.0
20719	646.4087	46.76	48.09	97.823													35601																		13	TLATIK		PEP_FRAG_1	148	153	b4b4∞b5b5∞b6y3y4y4∞y5y6	10	6.9337	8.2774	0.0000	1	28	646.4087	35601.0
20720	646.308	42.79	44.26	90.8188				7947	7451	5629	7376	6611	6750	6512	8134	8314		5986		8419		8072	11431	11446	10271	7885	7654	7613	7683	7759	6809	8692	9385	10122	6	NIGLDD		PEP_FRAG_1	364	369	b2b3*b4b6y2y4y4∞y5	8	7.4235	7.4235	0.0003	21	24	646.3069	15683.0
20787	646.3955	38.57	40.45	96.247				9541	8257	5258	7877	8385	4068	9313	10820	11625		8545	4511	8491	4742		13805	13132	13135	9108	10254	9717	11963	11714	11665				19	IGMVVK		PEP_FRAG_1	286	291	b3b4y2y3y5	5	7.9129	7.9129	0.0000	15	25	646.3966	13365.0
20788	646.3887	38.79	40.3	96.042													3991																		13	IGMVVK		PEP_FRAG_1	286	291	b3b6y6	3	5.7331	7.9129	0.0000	1	25	646.3887	3991.0
20794	646.4153	35.04	36.75	96.3023				23841	23358	24656	17451	14717	17310	12878	15661	15059		12330	19146	26230	27009	22405	26239	25972	24514	21568	18456	19380	17915	18814	19983	26319	24419	25864	21	ISSLVK		PEP_FRAG_1	218	223	b3b4∞b6y5y5∞y6	6	6.4374	6.4374	0.0013	3	4	646.4152	25578.0
20803	646.3981	42.32	44.18	100.102				8073	7899	5890	7000							9037	9430	9863	7681		7790	8553	8150	11632	12310	12425	11235	11298	11789				17	IGMVVK		PEP_FRAG_1	286	291	b2b4y2y4	4	7.4108	7.9129	0.0000	6	25	646.397	13168.0
20848	646.3177	21.96	25.08	89.2124					3211	12504	2466	2865				1470		2142	1908	1937						3355	3553	4323		2640	4103				5	TTPDGR		PEP_FRAG_1	88	93	b5y4y6	3	6.3896	6.3896	0.0013	2	2	646.3191	1980.0
20931	647.3382	32.36	34.15	92.5287	31820	28543	30280	66375	62041	76732	51264	50948	52291	40853	48482	49699	2523	34634	55433	73709	73867	82972	81061	79209	98574	62913	58033	61081	56886	54365	59499	48671	27907	46266	16	TDLNGK		PEP_FRAG_1	551	556	b2b3b3∞b4b5b5*b6b6*y2y3y3*y4y4*y6y6*	15	7.0168	7.0168	0.0007	5	5	647.3384	61644.0
20970	648.359	27.95	27.17	96.9577																												7312	6672	7473	30	ETSALK		PEP_FRAG_1	2	7	b3b3∞y3y6	4	5.7706	5.7706	0.0016	3	4	648.3594	5853.0
21003	648.3565	33.34	35.43	93.445																	10772														17	VSDSLK		PEP_FRAG_1	865	870	b6y4y5y6	4	6.3747	6.3747	0.0013	1	4	648.3565	10772.0
21027	648.3946	32.15	34.36	100.801				8291	8839		10096	11217	7115	4907	10915	12595		6725	6785	5995	6040			5206	7226	6476	6928		4594	5489	5808			10323	12	LSLSTK		PEP_FRAG_1	1325	1330	b3∞b4b4∞b6b6∞y3y4y5y6	9	8.1705	8.1705	0.0000	19	21	648.3944	14010.0
21028	648.38	44.42	43.53	100.44																												5614	6212	6816	29	SLLMGK		PEP_FRAG_1	439	444	b2b3y1y4y6	5	6.7698	7.4777	0.0001	2	15	648.3794	4228.0
21052	648.3218	32.77	34.69	90.0579																			6324	6357				3689	5478	5710	6760		3615		20	DTGDLK		PEP_FRAG_1	343	348	y4y6	2	6.2541	6.2541	0.0013	3	4	648.3221	6053.0
21066	648.3932	35.38	34.57	36.457																												2593			28	LSLSTK		PEP_FRAG_1	1325	1330	y3y5	2	7.7753	8.1705	0.0000	1	21	648.3932	2593.0
21067	648.3957	35.45	34.58	36.543																													2738		29	LSLSTK		PEP_FRAG_1	1325	1330	b2y3y4y5	4	7.9849	8.1705	0.0000	1	21	648.3957	2738.0
21068	646.3782	38.47	40.18	97.1677					1707		3046	2345			2693	2513				7218	9139	7131	4995	5270	4524	3179	3574	3001	7578	6791	6738	3012	3001	3699	26	TLPSTK		PEP_FRAG_1	568	573	y4y6	2	5.9015	5.9015	0.0015	2	3	646.3801	4114.0
21116	648.4031	45.81	47.15	99.585													192667																		13	LIFAGK		PEP_FRAG_1	43	48	b3b4b5y4y5y6	6	8.1926	9.279	0.0000	1	30	648.4031	192667.0
21121	648.4104	48.9	48.09	99.6957	112476	128083	140040																									108059	118788	132393	28	LIFAGK		PEP_FRAG_1	347	352	b2b3b4b5y1y2y3y4y5y6	10	9.151	9.279	0.0000	6	30	648.4106	91663.0
21124	648.4095	58.14	57.85	99.4897																												3205	3103	3354	30	AFGILK		PEP_FRAG_1	95	100	b3y6	2	5.4295	6.8789	0.0010	1	21	648.4076	2106.0
21125	648.4092	60.13	59.89	101.132																													1032		29	AFGILK		PEP_FRAG_1	95	100	b3y6	2	4.9918	6.8789	0.0010	1	21	648.4092	1032.0
21127	648.3547	33.14	35.69	93.05				6173												7200						6387	6648								23	VSDSLK		PEP_FRAG_1	865	870	y4y5	2	5.7745	6.3747	0.0013	1	4	648.355	4701.0
21128	648.3574	33.51	35.89	93.4313																									4999	3549	4793				27	VSDSLK		PEP_FRAG_1	865	870	y5y6	2	5.7568	6.3747	0.0013	1	4	648.358	2686.0
21145	648.4034	55.98	57.15	99.86													7563																		13	AFGILK		PEP_FRAG_1	95	100	b3b4y4y6	4	6.6041	6.8789	0.0010	1	21	648.4034	7563.0
21147	648.3245	51.04	52.38	93.1703					3190	3237	3350	2873	5022		1791	1682		2791	3407	3671		4111	3632	4007	3147	5331	5379			2684	2506	2587	3370	3314	28	DTGDLK		PEP_FRAG_1	343	348	b3y6	2	4.7881	6.2541	0.0013	1	4	648.3235	1727.0
21166	649.3684	29.74	28.84	92.3857	8419	13228	7799																									6127	5407	6378	29	AVAFNK		PEP_FRAG_1	108	113	b3b6*y1y3y4y6y6*	7	7.51	7.51	0.0001	5	7	649.3684	3810.0
21176	648.3168	55.12	56.29	94.3903						4338	3239	3315									4653	4056	4657		4392		3838			4103		3059		3512	17	GGLMDR		PEP_FRAG_1	576	581	y5∞y6	2	5.1568	5.4065	0.0020	1	8	648.3149	7864.0
21198	648.3367	36.62	38.46	93.7264				6194	5437	5336	6782	7090	5340					3687		16882	13176	12020	12825	12839	13568	7344	7318		9503	9473	11284	1804			7	SGSLER		PEP_FRAG_1	1120	1125	y3y6	2	5.1976	5.1976	0.0022	2	2	648.3372	4021.0
21206	649.3621	43.52	44.91	98.965													3757																		13	AVAFNK		PEP_FRAG_1	108	113	y4	1	6.1081	7.51	0.0001	1	7	649.3621	3757.0
21208	648.3773	41.1	42.94	100.64				7029	6319	5670	4759	5398	4422	6784	7780	7745				6996			6998	6838	6482	7435	7512	7252	8174	7324	7975				6	SLLMGK		PEP_FRAG_1	439	444	b2b3b4∞y2y3y4y5	7	7.4777	7.4777	0.0001	13	15	648.3753	15730.0
21212	648.4102	45.53	47.23	99.7718				178390	170627	139726	187996	196865	207180	74525	85432	88033		174094	224326	122112	107496	97951	126631	136660	117299	183677	189726	194622	261610	242577	269001				21	LIFAGK		PEP_FRAG_1	347	352	b2b3b4b5y1y2y3y4y5	9	9.279	9.279	0.0000	23	30	648.4101	122596.0
21379	650.353	43.43	42.64	95.6717																												12317	12584	14035	28	FLAQTA		PEP_FRAG_1	174	179	b2b3b4y3∞y4∞	5	6.6451	7.2054	0.0005	1	15	650.354	9621.0
21381	650.389	44.31	43.34	99.3885	6164																											29893	35151	36720	28	SVFLGK		PEP_FRAG_1	370	375	b2b3b4b5∞y2y3y4y6	8	8.3492	8.8913	0.0000	4	28	650.3894	24334.0
21383	650.3885	44.56	43.78	99.768		1255																													2	SVFLGK		PEP_FRAG_1	370	375	b3y2y6	3	5.7896	8.8913	0.0000	1	28	650.3885	1255.0
21405	650.3535	40.2	42.06	96.2248				8138	7904	8668	7604	7524	7698	7019	7908	7595		5653		8081			17018	15075	15756	8849		7990	17057	16881	14395				6	FLAQTA		PEP_FRAG_1	174	179	b2b3b4y2y3y3∞y4∞	7	7.2054	7.2054	0.0005	6	15	650.3529	24921.0
21418	650.3887	37.95	36.83	97.1043	6646	5999	6646																									13645	15443	14812	30	ASVFVK		PEP_FRAG_1	155	160	b4y2y3y6	4	7.4569	7.4569	0.0002	3	4	650.3884	11223.0
21419	650.3511	53.39	52.75	93.003																														2191	30	FLAQTA		PEP_FRAG_1	174	179	b6y4y5y6	4	6.9394	7.2054	0.0005	1	15	650.3511	2191.0
21429	650.3511	50.61	52.28	93.7714					1977												3067	2647		3067		2597									20	FLAQTA		PEP_FRAG_1	174	179	y3y4y6	3	6.8643	7.2054	0.0005	3	15	650.3523	2358.0
21449	650.3302	43.52	45.37	95.3833									3504							7018			4331	3399	3148	4415	4351		4315	4362	5799				25	GVGFDR		PEP_FRAG_1	263	268	b3b5y3y4y5	5	6.6997	6.6997	0.0011	2	4	650.3288	2701.0
21459	650.3864	62.1	62.1	98.299									9365																						9	ASVFVK		PEP_FRAG_1	155	160	b3∞b4y1y3y6	5	6.44	7.4569	0.0002	1	4	650.3864	9365.0
21488	650.3177	37.7	37.89	93.9958						2590													3493									2506		3282	6	DYGPAK		PEP_FRAG_1	77	82	y2y3y4y6	4	5.9239	6.0642	0.0015	1	3	650.3189	4523.0
21491	650.3171	35.4	37.65	94.3677																									2377	2222	3200				27	DYGPAK		PEP_FRAG_1	77	82	y4	1	6.0642	6.0642	0.0015	1	3	650.3152	1795.0
21501	650.3531	75.3	76.63	91.8552				11070	11651	10379	8714	7460	9263	11679	13937	13028		5234	6939	10083	8704	8717	11667	11325	12298		4177	4318	9553	9806	9023	13109	12133	12821	8	FLAQTA		PEP_FRAG_1	174	179	b4*y6	2	5.5498	7.2054	0.0005	1	15	650.3533	4617.0
21502	650.3888	43.27	44.48	99.3745	131553	143176	144748	131674	119649	114655	170080	166885	171849	31742	38868	41218	142166	110236	143544	132183	139909	123714	143459	138998	133381	213685	217927	205971	156681	152441	157360	94703	107311	109144	26	GLYGIK		PEP_FRAG_1	279	284	b2b3b4b5y1y2y3y4y5y6	10	9.3757	9.3757	0.0000	30	30	650.3895	117708.0
21515	650.3466	75.57	76.64	91.504													3753																		13	FLAQTA		PEP_FRAG_1	174	179	b4*y6	2	5.4122	7.2054	0.0005	1	15	650.3466	3753.0
21535	650.3505	67.03	68.16	97.4208									2207								1630	1967	2002	1456											17	FLAQTA		PEP_FRAG_1	174	179	b6y4*y6	3	5.3522	7.2054	0.0005	1	15	650.351	1901.0
21544	650.3892	40.86	42.66	99.8256				44546	41194	35204	42038	42124	29329	20203	21689	22783		32301	37777	44492	43780	39038	48080	44209	45735	49184	46656	44376	41175	37767	36209				17	SVFLGK		PEP_FRAG_1	370	375	b2b3b4b4∞b5y1y2y3y4y5y6	11	8.8913	8.8913	0.0000	22	28	650.3882	84613.0
21545	650.3831	41.1	42.55	99.644													29904																		13	SVFLGK		PEP_FRAG_1	370	375	b3b4y3y4y6	5	7.5405	8.8913	0.0000	1	28	650.3831	29904.0
21560	651.3477	29.42	31.81	100.668							1983	1955	4851		2528	2460	5107	3018	3139	3074	2398	1365	2442	2627	2622	1640	1673	1702							17	FSQAAK		PEP_FRAG_1	218	223	y2y3y5∞y6	4	7.2814	7.2814	0.0005	4	8	651.3463	2149.0
21604	650.3638	49.54	51.19	98.8405				7838	7720	7406	8782	8496	9051	11897	13653	11796		10821	13066	8364	8857	8943	12518	11827	11201	10972	11281	10965	10483	10653	10547				18	AFVASR		PEP_FRAG_1	2117	2122	b3b5∞y3y6	4	6.9901	6.9901	0.0007	5	5	650.3626	16067.0
21734	652.332	42.58	44.67	95.42																3265				1731					2484	2279	2816				16	YGLDGK		PEP_FRAG_1	122	127	y3y6	2	5.7456	5.7456	0.0016	1	2	652.3323	2824.0
21789	652.3689	31.36	30.49	99.2123																												4782	4493	5689	29	YSALAK		PEP_FRAG_1	428	433	b2b3y2y6	4	5.4081	5.4081	0.0024	2	2	652.3693	2972.0
21794	652.3684	33.02	35.24	98.8289				11868	11697		14614	14090	12028	10085	16662	17782	8003	9198	9875	17088	12135					11360	12301			9527					16	FGTSLK		PEP_FRAG_1	19	24	b2b3b4∞b6y3y4y5	7	8.3271	8.3271	0.0000	13	19	652.3696	22051.0
21795	652.3683	33.04	35.37	37.04																		5805	5395	5156	5915			7407	4342		4738				18	FGTSLK		PEP_FRAG_1	19	24	y3y4y5y5∞	4	7.8936	8.3271	0.0000	3	19	652.3678	7805.0
21796	652.3677	36.52	35.7	37.118																												8012	7947	8023	28	FGTSLK		PEP_FRAG_1	19	24	b5y2y3y5y5∞	5	7.5795	8.3271	0.0000	2	19	652.3674	5957.0
21797	652.3662	35.56	35.56	98.297						31213																									6	FGTSLK		PEP_FRAG_1	19	24	b2b3∞b4b4∞b6y3y5y5∞	8	7.521	8.3271	0.0000	1	19	652.3662	31213.0
21813	652.4415	39.49	41.51	39.124														1355																	14	VPIPVK		PEP_FRAG_1	1044	1049	y3	1	6.3669	6.3669	0.0013	1	6	652.4415	1355.0
21864	653.3274	28.71	30.63	96.8428				3986	5152	6329	5327	5570	3768		5468	5303	8797	5654		8176	2726		3140	3952	3387	6021	5904	6650		4765	6067	4868	4178	5019	29	NYASAK		PEP_FRAG_1	216	221	y3y6	2	5.8168	5.8168	0.0016	1	2	653.3281	2752.0
21883	653.3273	38.2	37.29	92.4973																												10450	10733	12213	28	NYASAK		PEP_FRAG_1	216	221	y4∞y6	2	4.814	5.8168	0.0016	1	2	653.3267	8040.0
21943	652.3306	30.87	33.21	95.0712				1880	1675				2300		1795	1789	3198			4058	3551		2724	2857	3302	2477		2703			2142				17	AAYAEK		PEP_FRAG_1	75	80	b2y3y6	3	6.0268	6.0268	0.0015	1	2	652.3316	3589.0
21963	654.2943	36.31	35.6	94.1023																												18379	20062	20626	28	GFMDGK		PEP_FRAG_1	732	737	b2y2y3y4y5y6	6	8.4257	8.4257	0.0000	3	14	654.2937	14626.0
21991	654.3465	28.42	27.43	95.5604		13104	11487																									25209	18971	29898	28	GSYSIK		PEP_FRAG_1	173	178	b3b3∞b4b4∞b5∞y2y3y4y5y6	10	8.4175	8.4175	0.0000	5	5	654.3462	22055.0
21999	654.2958	31.84	34.37	94.4644											20366	20447				24816				17804	19897	23135	21100	23434			24023				22	GFMDGK		PEP_FRAG_1	732	737	b2b4y2y3y3∞y4y5y6	8	8.3725	8.4257	0.0000	9	14	654.2945	20675.0
22024	654.3847	42.44	44.8	38.16																2441															16	ALPPEK		PEP_FRAG_1	676	681	y2y4	2	6.8407	6.8407	0.0011	1	2	654.3847	2441.0
22027	652.3312	29.07	31.68	90.6664				10475	12202		8857	9136		10752	16420	17169			6345	14376	6433	5088	11127	14189	12207	15383	16134	15875	14203	14391	18887				16	TEFAGK		PEP_FRAG_1	172	177	b3y3y6	3	6.3895	6.3895	0.0013	3	3	652.3318	18655.0
22046	654.3474	40.97	42.46	36.5568						2705	2425					2366		2221	2388																6	SSYGLK		PEP_FRAG_1	243	248	y4	1	4.6257	4.6257	0.0031	1	3	654.3453	5327.0
22054	654.2944	34.79	34.79	94.143						46470																									6	GFMDGK		PEP_FRAG_1	732	737	b5y3y4y4∞y6	5	8.1626	8.4257	0.0000	1	14	654.2944	46470.0
22056	654.2909	32.24	34.22	94.334													6966																		13	GFMDGK		PEP_FRAG_1	732	737	y3	1	5.9431	8.4257	0.0000	1	14	654.2909	6966.0
22065	654.3591	41.58	43.07	86.7823				2362	2144	2738					2434	2439	2187		2932	2832	2933	3065	3038	3042	2855	3465	2843	2894	2376	1937	2222	2558	2928	3171	6	DGPPLR		PEP_FRAG_1	186	191	y5y6	2	6.8277	6.8776	0.0010	6	12	654.3594	5495.0
22067	654.3588	41.07	43.04	97.1292														3079								4086	3954	4329							22	DGPPLR		PEP_FRAG_1	186	191	y5y6	2	5.7544	6.8776	0.0010	1	12	654.3575	2672.0
22081	654.3627	52.72	54.29	96.8928				11091		9368			9136		15461	17002		29432	28956	19515	17381		17709	17882	15291	17195	16040		12117	12316					16	GFGFVK		PEP_FRAG_1	52	57	b3b4b5y2y3y4y5	7	7.8433	7.8433	0.0000	15	19	654.3628	22641.0
22082	654.3572	53.03	54.23	96.621													29436																		13	GFGFVK		PEP_FRAG_1	52	57	b4b5y3y4y6	5	7.1724	7.8433	0.0000	1	19	654.3572	29436.0
22087	654.3595	38.86	40.71	97.3167				5554	4926	5020	4121	4033	5515	5718	5592	6617	3812	2965	4692	5733	6139	5524	6088	6330	5751	5035	5490	5891	4851	4354	4624				12	DGPPLR		PEP_FRAG_1	186	191	y1y2y3y5y6	5	6.8776	6.8776	0.0010	3	12	654.3607	6340.0
22157	655.3902	39.7	41.13	95.9812						2977					2848	2762				2935			3168	2916	2536			2531	2244				2663	2505	6	AGPGVVR		PEP_FRAG_1	175	181	y6y7	2	6.9291	6.9291	0.0009	1	4	655.3897	6379.0
22176	653.3527	66.1	67.32	97.454	9415		8034	29056	25664	25705	25427	23652	24637	27657	29728	28411		25591	25924	25820	29166	29000	29815	26958	27408	33332	32908	30430	30399	31183	27880	22082	23668	25121	23	SYTIGL		PEP_FRAG_1	632	637	b2b3b3∞b4∞b5∞b6y2y3	8	7.3531	7.3531	0.0004	28	29	653.353	25978.0
22179	653.3471	66.22	67.31	97.287													19819																		13	SYTIGL		PEP_FRAG_1	632	637	b3b3∞b4∞y3	4	6.3026	7.3531	0.0004	1	29	653.3471	19819.0
22210	655.4153	43.37	45.11	97.2436				8274	7654	7279	6961	6693	6385	7779	8114	8846		6114	8895	8923	9901	7970	6171	6042	5941	7344	7927	7595	5823	6132	6354				16	AIPQVK		PEP_FRAG_1	92	97	b4b5y3y5y6	5	5.6996	5.6996	0.0017	4	4	655.4162	9937.0
22261	656.4001	36.76	38.93	39.3581				2992	2752		4856	5080														5594	3044	5310	4433	4388					4	LPLGEK		PEP_FRAG_1	1421	1426	y3y3∞	2	5.3223	5.5122	0.0020	1	3	656.3997	1961.0
22263	656.3982	37.18	39.0	98.1417									2878			2225						3261	3114	3269	3104						5401				20	LPLGEK		PEP_FRAG_1	1421	1426	y3∞y6	2	5.4736	5.5122	0.0020	1	3	656.3979	2703.0
22282	656.4474	47.67	47.11	107.68																												21535	22606	25663	29	LLLAAR		PEP_FRAG_1	58	63	b2b3y6	3	6.9548	7.6918	0.0000	2	16	656.4482	17721.0
22290	656.4469	48.09	47.52	104.421																												12552	13547	16163	29	ILALAR		PEP_FRAG_1	176	181	b2b3y6	3	6.8022	7.8156	0.0000	3	24	656.4479	10349.0
22308	656.4722	50.0	49.23	104.179	6000	6341	6231																									2999	2975	3452	30	ILLVAK		PEP_FRAG_1	763	768	b2b3y3y6	4	6.9591	6.9591	0.0008	4	10	656.4723	2196.0
22313	656.472	60.61	60.45	103.17																												1541	1998	4206	30	ILILGK		PEP_FRAG_1	62	67	y3y4	2	6.6646	6.6646	0.0011	1	13	656.4736	2639.0
22354	656.4113	52.54	53.7	97.3113	29721	23671	30576	56143	51057	56434	47594	45476	54618	52761	52586	54824		35430	50180	59749	63186	62270	60206	61077	56929	62417	63175	53356	62645	56066	56060	64190	61874	61658	17	GILTPR		PEP_FRAG_1	388	393	b5b6y3y4∞	4	6.9055	6.9055	0.0009	1	6	656.4113	132569.0
22433	657.4059	32.83	35.21	98.792												6402																			12	AGLLQR		PEP_FRAG_1	620	625	b3b4y4y5y6*	5	7.0768	7.8402	0.0000	1	6	657.4059	6402.0
22434	657.405	33.08	35.46	99.192																											5083				27	AGLLQR		PEP_FRAG_1	620	625	b3y3y5	3	7.5935	7.8402	0.0000	1	6	657.405	5083.0
22441	657.4057	35.88	36.17	97.2842	24198	23149	22245													16402	13120														16	ALQLGR		PEP_FRAG_1	2	7	b2b3b6y3y4y5	6	7.3923	7.3923	0.0003	1	2	657.4058	20977.0
22458	657.397	55.73	57.03	100.413						4847	12514	11619	11828	9545	11344	13205										4459		3435							6	NSLVPK		PEP_FRAG_1	219	224	y2y3y6	3	5.7007	5.7007	0.0017	1	3	657.3961	13140.0
22463	657.4254	39.44	40.96	99.911													55409																		13	AGLVIGK		PEP_FRAG_1	245	251	b4b5b6y3y4y5y6y7	8	8.0571	8.6231	0.0000	1	28	657.4254	55409.0
22472	657.4306	39.08	40.73	100.818																	102335														17	AGLVIGK		PEP_FRAG_1	245	251	b3b4b5y2y3y6y7	7	8.1826	8.6231	0.0000	1	28	657.4306	102335.0
22473	657.4304	39.31	40.76	100.5															70067																15	AGLVIGK		PEP_FRAG_1	245	251	b3b4b5b6y2y3y6y7	8	8.0712	8.6231	0.0000	1	28	657.4304	70067.0
22515	656.4717	55.35	56.52	105.749		11848	12452	7837	7783	7747	7623	7263	7338	5357	7038	6514		4689	7348	7317	10137	7392	5655	5344	5776	5764	5711	5186	6433	8079	8074	5171	5697	5326	6	ILILGK		PEP_FRAG_1	62	67	b2y1y3y6	4	5.9524	6.6646	0.0011	1	13	656.4698	2530.0
22518	656.4728	58.44	59.91	38.9598				4562	3367										2134									1597							24	LLALVK		PEP_FRAG_1	435	440	y4	1	5.2425	6.2881	0.0013	1	5	656.4742	1019.0
22523	658.3636	28.88	31.52	95.4883				1564								1259				1853			1648	1938	1699	1607		1791							16	GALQNR		PEP_FRAG_1	215	220	b3b5*y6	3	5.6563	5.6563	0.0018	2	2	658.3641	1761.0
22535	658.3925	36.0	36.0	97.817						8389																									6	AEVLAR		PEP_FRAG_1	354	359	b2b3b4y3y5∞y6	6	5.9751	5.9751	0.0015	1	4	658.3925	8389.0
22555	657.4311	39.2	41.09	100.021				61171	54819	43056	65465	67580	40475	61856	77095	76907		65481		59868		49438	61888	63406	62162	53160	56129	59071	53866	55564	52916				12	AGLVIGK		PEP_FRAG_1	245	251	b3b4b5b6y1y2y3y4y6	9	8.6231	8.6231	0.0000	20	28	657.432	92308.0
22560	657.4319	40.11	42.16	38.3267				4663	5279									4070					4379	3910	3730			10895							24	LGIQVK		PEP_FRAG_1	290	295	b3y3*y5	3	6.7819	6.7819	0.0011	1	3	657.432	9272.0
22561	657.4312	41.34	42.91	103.912						1672			2174					2109	3896	2619	3114	2957	1542	1320		2669	2524	2833							17	VLLQGK		PEP_FRAG_1	1235	1240	b2y3y4y6	4	7.6937	7.9788	0.0000	6	9	657.431	3811.0
22563	657.4311	40.49	41.87	38.854															10680																15	LGIQVK		PEP_FRAG_1	290	295	y3*y5	2	6.146	6.7819	0.0011	1	3	657.4311	10680.0
22565	658.3897	34.92	36.62	96.4793					18428		42593	34169	46828	12643	29804	29157		19589	18768	25518		20358	26563	27815	27010	26434	22423	21710	21291			2213	2180	2650	16	EALLGR		PEP_FRAG_1	53	58	b2b3b6y3y5y6	6	8.1278	8.1278	0.0000	6	8	658.3895	33509.0
22593	658.3895	37.43	39.45	98.0892				5035	4833	5494	5053	3939		3759	4200			6215	12090			6770	5913	6072	6036	5127	5172	5574	4889	4634	4250				18	LALGER		PEP_FRAG_1	1310	1315	b4y3y6	3	6.0129	6.0129	0.0016	1	3	658.3882	10170.0
22611	658.4088	45.98	47.31	99.074													2338																		13	ADVILK		PEP_FRAG_1	89	94	y3y6	2	6.7675	8.3501	0.0000	1	23	658.4088	2338.0
22618	658.4271	39.17	40.98	37.921																		3048													18	LLLGSR		PEP_FRAG_1	147	152	y3	1	5.3976	5.3976	0.0024	1	2	658.4271	3048.0
22624	658.4109	47.61	48.73	98.0861				2805	2984		2220		3347				2725						3900				3132	3442					2845	2841	13	GIDLLK		PEP_FRAG_1	583	588	y5y6	2	5.5648	6.6511	0.0011	1	16	658.4067	1742.0
22635	658.4162	46.12	47.44	99.1559				4978	4669	4500		3928	4976		4843					4691		5748	6294	5671	5421	4803		4233	4101	4193	4231	6184	6060	5939	11	ADVILK		PEP_FRAG_1	89	94	y3y6	2	7.4785	8.3501	0.0000	2	23	658.4146	4099.0
22641	658.4211	42.03	43.86	99.4362				4045	3512	3340	4511	4514		3062	4301	4765	6803	5007		4629	3698	4536		5688	5296	5331		5706			4452				20	EVALVK		PEP_FRAG_2	313	318	y3y4y6	3	6.3611	6.3611	0.0013	3	4	658.4226	5188.0
22646	658.3896	33.42	35.56	98.3976				2385	2511		4057		3456		2900	3387	3478		2915	3332	2907	2270	2941	3286			3134	2827			2082				24	AEVLAR		PEP_FRAG_1	354	359	y3y6	2	5.7874	5.9751	0.0015	3	4	658.3879	1975.0
22647	658.3895	49.05	50.39	98.3278					10962					3154						15091			10656	10498	9793			11191	14519	13652	14220	8381	8171	8191	20	AGLLER		PEP_FRAG_1	1032	1037	b3y1y6	3	6.0913	6.0913	0.0015	2	4	658.3884	9900.0
22657	658.381	55.49	56.0	94.7758						2809						2290												2530					3291	3204	6	PVDLSK		PEP_FRAG_1	2	7	b6y4∞	2	6.6613	7.2783	0.0005	1	2	658.3814	5858.0
22659	658.3436	33.0	34.67	94.5874					7702	7101	6277	6183			5823	6444				11016					9188	7273	7674	8226			7201	6776	6955	6174	30	EDGLPK		PEP_FRAG_1	57	62	b2b6y4y6	4	5.5083	5.5083	0.0020	2	2	658.3425	4206.0
22662	657.4304	33.82	32.96	98.2138	5430	5614																										18147	18003	19167	30	IVNALK		PEP_FRAG_1	97	102	b3b4y3y4y5	5	8.045	8.045	0.0000	2	2	657.4315	14915.0
22665	657.4314	33.48	32.68	103.076																												9179	8843	9760	29	VLLQGK		PEP_FRAG_1	1235	1240	b2y3*y4y5	4	7.9788	7.9788	0.0000	2	9	657.4321	6452.0
22670	658.4136	46.25	45.47	99.6875	18039	14333	15909																									13073	12947	14618	30	GLIEVK		PEP_FRAG_1	212	217	b3b4y3y3∞y4y6	6	7.5538	7.7841	0.0000	6	18	658.4143	11069.0
22723	658.3907	60.34	59.95	101.643	30111	25852	30869																									33188	33633	38364	30	LALGER		PEP_FRAG_1	1310	1315	b3y6	2	5.2113	6.0129	0.0016	1	3	658.3909	29949.0
22730	658.4511	34.71	33.8	98.765	19322	24728	18131			1299																						167562	170229	163674	28	VVVITK		PEP_FRAG_1	143	148	b2b3b4b5b5∞b6y1y2y2∞y3y4y4∞y5y6	14	9.3191	9.3191	0.0000	6	15	658.4518	144511.0
22776	658.3906	57.91	59.46	101.829				40888	30189	28896			27177	22629	30283	28287				40544	37709	40282	33924	33295	32049	39119	42592	36360	33455	27758	30006				4	EALLGR		PEP_FRAG_1	53	58	b2b4y1y2	4	6.9652	8.1278	0.0000	1	8	658.3911	32703.0
22788	659.3475	35.15	37.07	88.5276				1594		2494			2650		1940	1595				3419		2795	2123	2221	1847		1694								16	VPGSSGR		PEP_FRAG_2	321	327	b7y6∞y7	3	5.6215	5.6215	0.0019	2	2	659.3493	3252.0
22824	659.3739	27.96	26.86	97.0423	31609	36477	36361																												2	LADVNK		PEP_FRAG_1	503	508	b3b5y3y4y5y6	6	7.3356	7.492	0.0001	3	6	659.3732	12017.0
22829	659.375	27.82	27.12	96.7387																												29613	26394	25340	28	LADVNK		PEP_FRAG_1	503	508	b3b5b5*b6y3y3*y4y5	8	7.492	7.492	0.0001	3	6	659.3743	26232.0
22840	659.4105	36.96	36.08	102.027																														2025	30	ASLIQK		PEP_FRAG_1	4	9	b3∞y6	2	6.5712	6.5712	0.0011	1	2	659.4105	2025.0
22859	658.41	54.95	56.15	101.089													14146																		13	LVGEIK		PEP_FRAG_1	290	295	b4y4y5y6	4	6.0743	7.4482	0.0002	1	14	658.41	14146.0
22917	659.3887	46.79	46.07	97.751																													3136		29	WIGVGK		PEP_FRAG_1	442	447	b3y4y6	3	6.836	6.836	0.0011	1	7	659.3887	3136.0
22918	659.3877	46.77	46.08	97.353																														3144	30	WIGVGK		PEP_FRAG_1	442	447	b3y4y6	3	6.6295	6.836	0.0011	1	7	659.3877	3144.0
22922	659.413	90.92	90.92	97.435						2317																									6	ALLFVP		PEP_FRAG_1	338	343	b3y5	2	6.4505	6.6478	0.0011	1	6	659.413	2317.0
22924	659.412	90.55	90.8	98.507																	1675														17	ALLFVP		PEP_FRAG_1	338	343	b3	1	6.2656	6.6478	0.0011	1	6	659.412	1675.0
22944	660.3949	30.5	29.67	98.6553																												43288	42935	50670	29	SELIAK		PEP_FRAG_1	85	90	b2b3b3∞b4b5y1y2y3y4y5y6	11	8.4978	8.4978	0.0000	3	12	660.3952	35761.0
22949	660.3948	30.71	30.04	98.9157	57670	69406	66742																												2	SELIAK		PEP_FRAG_1	85	90	b2b3b4y1y2y3y4	7	8.1037	8.4978	0.0000	2	12	660.3943	24588.0
22955	659.3842	34.86	36.8	93.4812				18021	16431	21784	12371	12133	14587	8504	8985	9083								16376		8588			12402	13153	15077				12	AVVSQR		PEP_FRAG_1	634	639	y3*y6	2	6.9667	6.9667	0.0008	5	5	659.3862	9587.0
22973	660.3947	31.24	33.51	99.2362				3900	3777	3500	2502			2780				2181			4926	4653		3923		4567	3805	4722			3221				22	GLLTEK		PEP_FRAG_1	19	24	y1y3y4y6	4	6.3099	6.3099	0.0013	2	2	660.3952	3173.0
22974	659.388	50.75	52.11	98.0693				10448	10770	10348	9393	8975		3988	5458	5367							14106	13440	13374				11111	9212	10395	11043	11207	11233	27	WIGVGK		PEP_FRAG_1	442	447	y3y5y6	3	5.7727	6.836	0.0011	1	7	659.3879	6181.0
22983	659.4078	44.9	46.23	94.6637				1903		2474	7073	7357	7939			4025	9143	7728																	8	ASLLAGK		PEP_FRAG_1	175	181	b6∞y7	2	5.0366	5.0481	0.0029	1	2	659.4099	4416.0
22991	660.3914	41.64	41.64	97.056						1669																									6	ATIDIK		PEP_FRAG_1	897	902	y3∞y6	2	5.5453	6.2471	0.0013	1	3	660.3914	1669.0
23001	660.3331	32.06	34.4	91.1458				3036	2354		2300		4743	2825	3766	4206				5757	5039	5516	4328	4399	4969	3198	2826	3434	3878	3880	4792				16	QEQAGK		PEP_FRAG_1	152	157	b3b5*y3y6	4	6.5903	6.5903	0.0011	6	6	660.3343	6604.0
23004	660.3924	36.25	37.59	96.8002				3378	4214	4276		2918	4129	2850		3773	2493	2154	3004				5312			4816	3652	3496				3477	3488	3671	23	TIGEIK		PEP_FRAG_1	1245	1250	y4y6	2	6.1472	6.1472	0.0014	2	4	660.3964	2346.0
23029	660.4106	47.78	49.26	106.353																		1059													18	VLLMGK		PEP_FRAG_1	43	48	y3y4y5	3	6.2696	7.2177	0.0005	1	10	660.4106	1059.0
23033	660.391	35.2	36.8	98.7782				8139	7425		7601		5059	3592	4937	4855	5490		6706	9143	8320	6828	13724	11368	12112	9347	7977	8826		7335	6547	7202	5757	5493	20	SELIAK		PEP_FRAG_2	85	90	b2b2∞b3b3∞b4y2y6	7	7.7314	8.4978	0.0000	6	12	660.3908	11554.0
23086	660.3921	64.09	64.84	99.592															1483		1496	1528													15	TKELLG		PEP_FRAG_1	257	262	y4∞y6	2	4.4732	5.2346	0.0027	1	2	660.3932	1132.0
23093	660.3952	57.22	58.37	99.562	31614	27191	31620	57753	55150	52592	47840	51264	44124	37825	41261	44378		41897	55090	48738	44047	35991	54553	57206	57141	37275	34260	29596	33740	29667	29294	30367	30363	32817	30	ELTGLK		PEP_FRAG_1	74	79	b2b3b3∞b4b4∞b5b5∞b6b6∞y2y3y4y4∞y5y6	15	7.0672	7.0672	0.0006	10	10	660.3953	25496.0
23112	660.4045	69.03	69.35	99.3064						4811			6935								11522	11716										6562	5736	5925	18	TLSALR		PEP_FRAG_1	642	647	b1∞b2∞b3b4b4∞b5∞b6y6	8	5.9585	6.0085	0.0015	1	3	660.4024	22375.0
23121	660.3964	38.71	40.09	101.454				3255	2898	2812	2120									4154				2063	1667			1611	2225	2169	2552	3522	3302	3542	25	ATIDIK		PEP_FRAG_1	897	902	y3	1	6.2471	6.2471	0.0013	1	3	660.398	1371.0
23127	660.4314	30.81	30.01	97.7747																												142614	129086	133441	29	VTVITK		PEP_FRAG_1	148	153	b2b2∞b3b3∞b4b5b5∞b6y2y2∞y3y3∞y4y5	14	9.0966	9.0966	0.0000	3	8	660.4324	111743.0
23131	660.4287	30.99	30.29	98.1743	16842	18539	15161																												2	VTVITK		PEP_FRAG_2	148	153	b3∞y2y4y5	4	7.1168	9.0966	0.0000	3	8	660.4287	5343.0
23149	661.3371	27.06	26.11	98.184																												3576			28	MPGSAAK		PEP_FRAG_1	1	7	b4b5y1y3y7	5	5.8569	5.8569	0.0016	1	2	661.3371	3576.0
23152	661.344	24.96	24.47	36.0753																												5686	5495	5481	28	FGGPGAR		PEP_FRAG_1	132	138	y3y4y5y6	4	7.91	7.91	0.0000	3	4	661.3426	4499.0
23153	661.338	27.19	26.36	97.706																														4423	30	MPGSAAK		PEP_FRAG_1	1	7	b4y3y7	3	5.5202	5.8569	0.0016	1	2	661.338	4423.0
23158	661.372	28.14	27.27	100.529																												8414	8809	8348	30	VQVMGK		PEP_FRAG_1	399	404	b2b3y2y3y4y5	6	8.0935	8.0935	0.0000	3	4	661.3713	6624.0
23162	661.3725	30.1	29.17	96.5173																												30750	27625	33045	30	GVMINK		PEP_FRAG_1	217	222	b2b3b4y2y2*y3y4y6	8	8.5019	8.5019	0.0000	3	7	661.3724	27982.0
23163	661.3712	30.32	29.53	96.8927	6032	6500	6368																												3	GVMINK		PEP_FRAG_1	217	222	b3y6	2	6.0018	8.5019	0.0000	2	7	661.371	1531.0
23198	661.3535	50.42	52.03	95.18													2035		1966	2286										2065					16	TGGLADK		PEP_FRAG_1	54	60	b7y3∞y7	3	5.8451	5.8451	0.0016	1	2	661.3546	1927.0
23234	660.3728	51.42	52.95	97.9986				9082	9347	5463	7567	8228	5285	5505	6849	5938		10681	8218	6832	7458	7117	6881	7054	7267	6964	7077	6587	7536	7760	6183	2582			5	LGLSDR		PEP_FRAG_1	1670	1675	y5	1	5.4526	5.4526	0.0020	1	2	660.372	6668.0
23252	661.3886	37.2	38.91	98.8282				8560	8037	7735	7635	7342	7177	8924	8769	9182		16966	24390	9227	10465	8430	12705	10226	11166	11202	10730	11661	6123	5725	5062		7306	7241	24	TSLNVK		PEP_FRAG_2	293	298	b3∞b4b5∞y2y3y4y5y6	8	6.1778	6.1778	0.0014	2	2	661.3894	10125.0
23310	661.3695	32.62	35.02	36.973														4552								2158	2159	2831							24	VGFNPK		PEP_FRAG_1	248	253	y5	1	6.2534	6.4363	0.0013	1	3	661.367	1977.0
23319	662.3374	29.07	31.02	92.2753	60106			116148	112716		83520	88391	67815	114499	116501	117535		71547	103329	143172	143814	149007	146568	155823	156480	122243	119207	117756	108166	101153	134312	105537	98443	108209	17	EEISGK		PEP_FRAG_1	769	774	b2b2∞b3b3∞b5b5∞b6b6∞y1y3y3∞y4y4∞y5y5∞y6	16	8.1694	8.1694	0.0000	26	30	662.3362	221043.0
23320	662.337	31.84	31.37	92.0267		61825	69843			141573																									6	EEISGK		PEP_FRAG_1	769	774	b2b2∞b3b3∞b5b5∞b6b6∞y1y3y3∞y4y4∞y5y5∞	15	7.845	8.1694	0.0000	3	30	662.3355	340448.0
23321	662.3319	28.8	31.02	92.119													84794																		13	EEISGK		PEP_FRAG_1	769	774	b3b3∞b5∞b6b6∞y3y4y5y5∞y6	10	7.2744	8.1694	0.0000	1	30	662.3319	84794.0
23324	662.356	37.58	38.5	97.5427	8315	6879	8413				13060			18418				8751					30580		24327			16750	27034	27838	25160	38903	44321	40962	30	MAALEK		PEP_FRAG_1	1	6	b2b3b4b5y2y3y4y5	8	7.2934	7.2934	0.0005	5	5	662.3559	32570.0
23327	662.3524	39.44	41.28	96.1949				16210	15352	17936	13186	13184	13604	11135	11052	11513	11504	11297	17401	17388	23794	20744	15215	13769	13957	14204	12995	14879	11847	12010	11184				26	MEAIAK		PEP_FRAG_1	1	6	b4b6y1y6	4	6.0499	6.0499	0.0015	1	4	662.3536	7624.0
23329	662.3559	45.32	44.67	99.971																												5940	6998	7240	28	DVLGMK		PEP_FRAG_1	25	30	b4y2y3y4y6	5	7.5183	7.5183	0.0001	3	4	662.3564	4184.0
23344	662.3372	55.59	55.21	93.176																													1026		29	TDLADK		PEP_FRAG_1	128	133	y4y6	2	5.5055	5.5055	0.0020	1	2	662.3372	1026.0
23374	662.3508	34.6	36.56	97.5149				3597	2901	3709	6388	8318	7607		2436	2318	3050		9230	10712	4771	4127	13490	10009	9288	13756	15350	14534	6835	9214	11980	3694		3265	22	DLMVGK		PEP_FRAG_1	116	121	b3y3	2	6.0825	6.2599	0.0013	2	5	662.3558	2969.0
23376	662.3644	35.54	37.32	37.1582				7542	7488	5395	6232	6640			3249	3011		2747		9251		3277	9542	9692	9785	8576	8121	7321	6243	5977	7305	11820	7484	12217	28	MAALTR		PEP_FRAG_1	1	6	y3y5	2	7.4969	7.4969	0.0001	1	6	662.3657	9236.0
23400	662.3537	68.61	69.98	96.3403						2601	2510	2221	2689						2892	2345	3680	2788		2191	2282	3211	3466	3122	1709	1882					20	LTSGWV		PEP_FRAG_1	675	680	b4y6	2	5.1963	5.2271	0.0027	4	5	662.3542	1669.0
23411	662.425	54.02	53.59	101.364																												5060	5335	5925	30	VLGFVK		PEP_FRAG_1	339	344	b3b4y4y5y6	5	7.2556	7.2556	0.0005	3	22	662.4258	3935.0
23420	662.4257	54.33	55.91	101.193				28888	29409	26535	25868	23339	22647	23394	28534	31429		18565	25020	31682	34454	29439	25582	26206	24616	31477	31185	30481	26989	25138	26718				11	VLGFVK		PEP_FRAG_1	339	344	b3b4b5y6	4	6.0375	7.2556	0.0005	5	22	662.4256	31129.0
23422	662.4247	51.32	52.92	101.992				4703	4512	3479	4171	4502	4357	3610	5053	5161	6182	4564	3828	4745	3971	3831	5262	5127	4685	4463	4343	4485	3939	3979	3528				25	VLGFVK		PEP_FRAG_1	339	344	b4y2y4y6	4	7.0469	7.2556	0.0005	14	22	662.4263	2502.0
23423	662.389	46.88	48.53	98.5325				42038	42407	40619	36537	33117	36246	29910	33668	36374	66260	50606	51716	41989	40016	38053	41844	39386	39746	43304	43776	41085	40156	39566	37794				15	GFPTIK		PEP_FRAG_1	236	241	b2b3b4b4∞b5b5∞y2y3y3∞y4y4∞y5y6	13	8.9168	8.9168	0.0000	23	29	662.3884	55460.0
23450	662.3929	36.74	35.88	101.221																													2478		29	ATLVMK		PEP_FRAG_1	1053	1058	b3b4y3y6	4	6.8619	6.8619	0.0011	1	5	662.3929	2478.0
23453	662.3928	36.7	35.97	101.076																														2540	30	ATLVMK		PEP_FRAG_1	1053	1058	b2b3∞y6	3	5.6338	6.8619	0.0011	1	5	662.3928	2540.0
23455	662.3942	36.67	35.69	101.216																												2302			28	ATLVMK		PEP_FRAG_1	1053	1058	b3b3∞y6	3	5.7502	6.8619	0.0011	1	5	662.3942	2302.0
23464	662.3982	50.26	51.91	96.8954				2606	2182	2906	2532	2408	3501							3180			4448	4219		4231	4732	4991	3816	4473	3176				20	GVAFIR		PEP_FRAG_1	148	153	b3y6	2	5.642	6.1042	0.0016	4	7	662.3997	3349.0
23467	662.3979	51.2	52.24	100.834						2192			2269							1809	2369			1688											6	GVAFIR		PEP_FRAG_1	148	153	b4y4y6	3	6.1042	6.1042	0.0016	1	7	662.3969	3183.0
23478	662.3563	41.95	43.25	97.4701	9551		7282	45238	38443	40306	28568	29092	30200	24304	28805	27181		28018	30816	44061	37623	34926	50441	48736	44215	50280	51041	48837	46500	44315	43872	45591	54623	53619	8	DLMVGK		PEP_FRAG_1	116	121	b5∞b6y4y6	4	6.2599	6.2599	0.0013	1	5	662.3571	19344.0
23489	661.3704	40.01	42.12	98.907												2534																			12	GVMINK		PEP_FRAG_1	217	222	b6y1y3y6	4	7.0807	8.5019	0.0000	1	7	661.3704	2534.0
23506	663.349	25.8	27.98	39.0019	15577	16561	16310	13965	12486		8293	9356		14362	14574	16265		6208	2790	11079			26624	26661		11407	10333	10981	23500	21863	24422			33776	24	LMNTGK		PEP_FRAG_1	39	44	y2y5y6	3	6.6624	6.6624	0.0011	1	2	663.3502	9191.0
23644	663.3478	44.37	46.1	97.2698							1869	2281	3561							3116	3388	3130	3037	3076	2506	6387	6024	6886							20	SLVGCK	Carbamidomethyl C(5)	PEP_FRAG_1	1207	1212	b3∞	1	4.2023	4.2023	0.0032	1	2	663.35	2471.0
23673	664.3681	32.33	34.6	38.945																	7709														17	LGEFAK		PEP_FRAG_1	189	194	b1y2y3y5	4	7.761	8.2737	0.0000	1	24	664.3681	7709.0
23674	664.3674	35.19	35.19	98.06						21421																									6	LGEFAK		PEP_FRAG_1	189	194	b3b4b6∞y3y5y6	6	7.3156	8.2737	0.0000	1	24	664.3674	21421.0
23703	663.3489	47.47	46.68	96.8246	10044	9960	8466																									2305		2608	30	LMNTGK		PEP_FRAG_1	39	44	b3	1	4.9097	6.6624	0.0011	1	2	663.3485	1664.0
23715	662.3886	49.7	48.93	98.1632	23774	22271	23768																									35626	44454	42439	29	GFPTIK		PEP_FRAG_1	236	241	b3b4b4∞b5∞b6y2y3y4y4∞y5y6	11	8.4085	8.9168	0.0000	6	29	662.3893	35832.0
23730	664.4023	37.18	36.18	100.514																													4406		29	IFVGTK		PEP_FRAG_1	129	134	b2y3y4y5∞	4	7.3251	7.5628	0.0000	1	10	664.4023	4406.0
23731	664.4023	37.14	36.18	100.015																														4519	30	IFVGTK		PEP_FRAG_1	129	134	y3y4	2	6.834	7.5628	0.0000	1	10	664.4023	4519.0
23732	664.4015	35.26	37.79	38.975																1012															16	IFVGTK		PEP_FRAG_1	129	134	b3y3	2	6.1192	7.5628	0.0000	1	10	664.4015	1012.0
23735	664.4064	37.11	36.18	100.391																												4006			28	IFVGTK		PEP_FRAG_1	129	134	y2y3y4	3	7.168	7.5628	0.0000	1	10	664.4064	4006.0
23738	664.4024	38.05	40.38	37.9637																1680				1262	1254										20	AYLLGK		PEP_FRAG_1	8	13	y5	1	5.1218	5.7191	0.0017	1	6	664.4024	1040.0
23739	663.3668	43.9	45.51	96.2535				4694	4179	4889	2697	2393	3996					2320			6173	5576			3114	3113	2820			2570					17	SSALASK		PEP_FRAG_2	690	696	b3b5y3y4y6	5	6.6128	6.6128	0.0011	4	6	663.3651	10401.0
23747	664.4043	44.13	43.26	101.416																												12189	13205	13959	29	FGTVLK		PEP_FRAG_1	207	212	b3b3∞b4y2y5y5∞	6	7.5408	8.2722	0.0000	3	23	664.4045	9990.0
23754	664.4051	33.08	35.54	100.999					5421		7699	8406													5680						6232				21	IFVGTK		PEP_FRAG_1	129	134	y3y4y5	3	7.5628	7.5628	0.0000	3	10	664.4045	5286.0
23755	664.407	35.84	35.84	100.308						22032																									6	IFVGTK		PEP_FRAG_1	129	134	b2y3y4y4∞y5	5	7.4689	7.5628	0.0000	1	10	664.407	22032.0
23757	664.4038	48.59	50.26	100.906				13803	13441	12382	13101	11715	9821	9343	9772	10049		10893	12483	12414	12261	10055	10290	10477	8765	11712	10781	11779	6757	8129	8189				16	SLVAFK		PEP_FRAG_1	140	145	b2b3b4y2y3y4	6	7.8413	7.8413	0.0000	23	28	664.4048	14048.0
23762	664.3716	34.79	36.49	37.4614				1663					1428						2691		2421					1815									9	IGFAEK		PEP_FRAG_1	287	292	y5	1	6.3952	7.3259	0.0005	1	7	664.3695	1026.0
23767	664.3688	35.61	35.77	39.1653															1624													12156	13700		28	LGEFAK		PEP_FRAG_1	189	194	b3y3y5y5∞	4	7.8618	8.2737	0.0000	2	24	664.3684	9581.0
23770	664.3687	36.5	35.66	98.129																														9798	30	LGEFAK		PEP_FRAG_1	189	194	b3y3y5	3	8.1369	8.2737	0.0000	1	24	664.3687	9798.0
23783	664.4043	35.25	34.31	101.619	9635	12033	7636																									6719	7800	7139	30	LIYAGK		PEP_FRAG_1	46	51	b2b3y2y3y4y6	6	7.8442	8.1571	0.0000	6	12	664.4038	5007.0
23791	665.3636	29.12	28.28	95.696																													2124		29	IFGSNK		PEP_FRAG_1	103	108	b2b6y4y5y6	5	7.9626	7.9626	0.0000	1	2	665.3636	2124.0
23792	665.3633	29.13	28.28	95.535																														3190	30	IFGSNK		PEP_FRAG_1	103	108	y4y5y6	3	7.9264	7.9626	0.0000	1	2	665.3633	3190.0
23793	664.4032	51.44	50.92	100.501	5396	4993	4536																									8319	8418	10763	28	SLVAFK		PEP_FRAG_1	140	145	b3b4y2y3y4y6	6	7.4432	7.8413	0.0000	4	28	664.4031	6183.0
23811	665.3635	34.8	33.91	97.8337																												10542	11262	12895	28	GFSNLK		PEP_FRAG_1	734	739	b2b4b4∞y4*y6	5	7.3011	7.3011	0.0005	1	2	665.364	8248.0
23841	664.4052	41.04	42.85	101.746				19580	16888	7425	18775	21464	8232	13332	15114	15201	31461	42256	42890	21468	17939		20200	19909	19781	22249	21038	20746	11907	10950	10665				16	FGTVLK		PEP_FRAG_1	207	212	b3b3∞b4b4∞b5b5∞b6y2y3y4y5y5∞	12	8.2722	8.2722	0.0000	19	23	664.4052	26245.0
23848	664.4027	31.67	33.57	101.46					7785				5576	2607		17281	16295	8435																	12	LIYAGK		PEP_FRAG_1	46	51	b2b3b4y1y2y3y4y5	8	8.1571	8.1571	0.0000	4	12	664.4042	19789.0
23868	665.3401	40.04	41.87	98.647				8965	8952	8766	5432	6297	5065		6247	6351	10153	10359	14951	7663	9996	9396	9003	8922	8098	11052	11221	10208	10290	10034					22	GYVGNR		PEP_FRAG_1	17	22	y3	1	4.9999	6.5457	0.0011	1	7	665.3401	8926.0
23872	665.3661	47.93	47.34	99.873																														1917	30	GFSNLK		PEP_FRAG_1	734	739	y4y4∞	2	6.6872	7.3011	0.0005	1	2	665.3661	1917.0
23888	664.4047	42.75	44.38	106.227				2094	2315	2632			2709				2280		2285	3618	3371	2903		2060	1805	3671	3559	4086	2233		2198				16	AYLLGK		PEP_FRAG_1	8	13	b2b3y6	3	5.7191	5.7191	0.0017	5	6	664.4051	3210.0
23938	665.3399	43.58	42.79	98.2673																												10462	10939	10764	29	GYVGNR		PEP_FRAG_1	17	22	y1y3	2	6.2896	6.5457	0.0011	1	7	665.3403	8125.0
23982	666.3259	38.46	37.97	94.775									1395																						9	MGFPSK		PEP_FRAG_1	408	413	y3y6	2	5.6005	6.1106	0.0015	1	5	666.3259	1395.0
23986	666.3339	35.78	38.0	38.574																1396					1369			1681							21	MGFPSK		PEP_FRAG_1	408	413	y3	1	5.7568	6.1106	0.0015	1	5	666.3327	1127.0
23987	666.3303	35.7	37.98	94.901												1213																			12	MGFPSK		PEP_FRAG_1	408	413	y3	1	6.1106	6.1106	0.0015	1	5	666.3303	1213.0
23995	666.349	39.14	41.46	95.649																					1111										21	SGFDIK		PEP_FRAG_1	541	546	b4y6	2	5.3981	5.9563	0.0016	1	8	666.349	1111.0
24007	666.3478	48.53	47.96	94.3007																												9162	8206	9666	30	FDLGSK		PEP_FRAG_1	128	133	b3b3∞y3	3	6.1219	6.1361	0.0015	1	4	666.3472	7005.0
24009	666.3592	34.73	35.99	100.511	16135	10299	9835	30972	30728	44733	30982	29357	38526	14608	17908	17515		23821	35904	45309	45290	46437	37328	34091	36894	30563	30043	34749	33337	30394	31877	18099	25608	26693	9	AYSLGR		PEP_FRAG_1	315	320	b2b6y4y6	4	6.83	6.83	0.0011	1	4	666.3583	45523.0
24019	666.3584	29.86	32.26	101.404				4110			6036	5074	5840		6953	7263		6000		5115	2795		3409	3718	3290			5209		3325	4582				11	AYSLGR		PEP_FRAG_1	315	320	b3y6	2	6.1257	6.83	0.0011	1	4	666.3582	7057.0
24028	666.3211	36.72	38.76	93.6119				7552	7514	11681	5835	5657		7420	6431	7420	4330	6304	11147	8482	14080	13553		8771	8431	8937	8276	8887	8072	8103	9515				10	SPSYGR		PEP_FRAG_1	199	204	y5y6	2	6.0843	6.0843	0.0015	5	5	666.3221	3091.0
24031	666.3485	31.9	33.59	99.3091	11513	8804	10800	6200	6263	6522	4544	4156	5347	6284	7368	7385		17285	30793	16703	15680	16994	9675	8887	9687	10174	9925	10316	7651	6196	6553	6499	7018		6	VAAYDK		PEP_FRAG_1	1405	1410	b3y3y6	3	7.6686	7.6686	0.0000	4	5	666.3482	17099.0
24059	666.3835	30.4	32.74	102.088				3636	5525	4311	3480	3618	4672		4340	4279	8872	6213	6813	3624	3721	2925	3841	4007	4203	3847	3278	3982	2235	2065	2627				15	YSVAVK		PEP_FRAG_1	107	112	b3b3∞y3y5	4	6.8616	6.8616	0.0011	14	14	666.3828	5080.0
24068	666.3474	49.38	50.73	93.8915				6151	5677	5441	9824	10676	9292				13954	11002	11840	12623	11494	11763	14717	14559	13508	25314	25091	24260	11357	13533	12850	7231	7244	8480	24	YGDALK		PEP_FRAG_1	501	506	y5∞y6	2	5.344	5.8666	0.0016	2	5	666.3491	21780.0
24075	666.4309	29.12	28.21	37.9942	5342	4742	5701																									7511	6640	7884	28	LHVAVK		PEP_FRAG_1	455	460	b2b4y3y4	4	6.7829	6.7829	0.0011	2	2	666.4316	5934.0
24089	664.4049	44.96	46.4	103.307				4261	3970	4774	3412	3562								4753		5234	5353	5345	4834	4113	3863	4659	4019	3337	3993	3931	2906	2970	23	LIYAGK		PEP_FRAG_1	46	51	y4	1	6.797	8.1571	0.0000	2	12	664.4047	2490.0
24118	666.4313	34.52	36.6	107.46				4185	3342	4717	6683	5879	11025		6108	6131				1728	1684	1587	4620	5382	4997	2189	1937	1977	3085	2734	2427				11	LIPAPR		PEP_FRAG_1	195	200	y4y6	2	7.4623	7.4623	0.0001	4	7	666.4332	5966.0
24123	666.3468	40.09	39.67	98.655									3669																						9	SGFDIK		PEP_FRAG_1	541	546	b3b4y6	3	5.412	5.9563	0.0016	1	8	666.3468	3669.0
24130	666.3474	45.88	47.51	94.8364									5413			1905	22139	21275	23849	21647	17446	15591				21350	20024	18350	6101	6641	6977				15	FDLGSK		PEP_FRAG_1	128	133	b3b5b5∞b6b6∞y3y3∞	7	6.1361	6.1361	0.0015	1	4	666.348	25024.0
24238	665.3356	43.52	45.26	38.2003				9652	9826					6745				13150	13788	13869	11712	11424						5864							16	GYVGNR		PEP_FRAG_1	17	22	y4y4*	2	5.3866	6.5457	0.0011	1	7	665.3367	16167.0
24319	667.3066	27.23	29.26	93.6813				5395	6170	9110	6044	4924	3665	2962	6269	7599		4472	4869	7740	4996	3534	6724	7641	7360	6331	5965	6684	4791	5607	6487	5139	5005	4758	26	NADGYK		PEP_FRAG_1	249	254	b4y2y6	3	6.2799	6.2799	0.0013	3	3	667.3067	3228.0
24326	668.3779	62.72	62.66	97.9183																												6493	6332	7064	30	GFGFIK		PEP_FRAG_1	333	338	b3b4y1y4y6	5	6.7478	8.1273	0.0000	3	26	668.3784	4825.0
24347	668.3785	60.34	61.85	98.4369				12062	9326	8956	9879	10405	8396	10396	8526	8982	57902	51637	56481	29312	30355	26641	11941	11024	10962	21192	18991	18283	10024	10207	9373				14	GFGFIK		PEP_FRAG_1	333	338	b2b3b4y1y2y3y4y5y6	9	8.1273	8.1273	0.0000	21	26	668.3792	31389.0
24352	668.3791	81.22	82.75	102.044				17715	15742	13868	16177	17456	19564	16655	21474	23480		31728	36356	26164	31024	27397	21786	19068	20372	20328	23682	21677	19589	20017	19996				12	GFGFIK		PEP_FRAG_1	333	338	b2b5y1y4y6	5	7.3446	8.1273	0.0000	2	26	668.38	24799.0
24445	668.3262	29.31	31.53	92.9605				4970	4475	4718	2797	2997	3338	3402	4266	4535	7421	5870	7846	6294	5212	5544	6851	7912	7199	5873	5731	6174	3975	3885			5489		29	ADFSTK		PEP_FRAG_1	230	235	y4∞y6	2	5.5615	5.8458	0.0016	1	5	668.328	3743.0
24479	669.425	38.78	40.3	100.778													5260																		13	GGVPLVK		PEP_FRAG_1	306	312	b5y4y7	3	6.52	7.7843	0.0000	1	25	669.425	5260.0
24480	669.4297	32.19	31.31	101.13																												1896	2467	2485	28	IQPLAK		PEP_FRAG_1	454	459	y4y6	2	7.0286	7.0286	0.0006	3	3	669.4287	1312.0
24483	669.4315	41.82	41.06	100.312																												10186	11366	12867	29	GGVPLVK		PEP_FRAG_1	306	312	b4b5y2y4y7	5	7.6341	7.7843	0.0000	3	25	669.4318	8458.0
24497	667.4042	63.48	64.84	97.1855						2255										1742			1684	1579	1389	2363	1868	1875	1635			1734	1615		6	LLPPID		PEP_FRAG_1	225	230	b6y3y6	3	4.82	5.6975	0.0017	1	3	667.4028	2995.0
24516	669.4313	71.35	72.56	98.3218	56262	55232	60950	78709	67532	89441	71420	65464	81582	52698	58805	59804	61585	50812	77201	69971	87526	76283	63008	62949	64995	73074	71033	69227	68505	62398	60692	78134	86362	89541	16	PLAQLK		PEP_FRAG_1	2	7	b2b4b5b5*b6y4	6	6.0463	6.0463	0.0015	1	2	669.4318	87398.0
24537	670.3327	43.62	45.35	97.2638				19130	20094	20925	23642	22464	32156	21184	28954	26523		20276	24319	20548	21903	20890	22027	19984	22804	16843	17004	17105	15206	16230	19642				9	GFGSFR		PEP_FRAG_1	767	772	b2b4b5∞b6y4	5	8.4956	8.4956	0.0000	17	19	670.3306	49891.0
24608	670.4131	38.82	38.02	98.3353																												2885	3121	3959	28	EIPLAK		PEP_FRAG_1	103	108	b2y2y4y6	4	7.3399	7.3399	0.0004	3	5	670.4119	1922.0
24626	670.4486	53.63	53.19	38.883																												2231			28	LPLLSK		PEP_FRAG_1	332	337	y3y5	2	6.546	6.7278	0.0011	1	10	670.4486	2231.0
24634	670.45	47.2	47.88	100.658						1440											2081	2265	2000		2000							3823	3394	3475	17	LLTPVK		PEP_FRAG_1	4	9	b3∞y6	2	4.9956	4.9956	0.0029	3	3	670.4479	2379.0
24642	670.3901	55.76	57.32	104.097				2859	3204	3514	2598		3323	3727	4136	4110	5330	4407	8389	4260	4636		3822	3531	3716	3788	3561	3267	3162	2642	2405				6	DVALPR		PEP_FRAG_1	246	251	b6∞y2y4y6	4	6.4262	6.4262	0.0013	1	2	670.3897	8596.0
24644	670.333	45.65	46.11	95.7154	15543	15062	12385									1350					2685		1862	1401	1417							15611	13364	16415	30	GFGSFR		PEP_FRAG_1	767	772	b4y1y6	3	6.794	8.4956	0.0000	1	19	670.3313	12518.0
24657	670.4511	69.59	71.07	102.55				4994	4572	5028	4419	3353	5036		5200	5966			4837	4534	5279	4773	5893	5819	4850	5025	4803	4330	4129	4054	4249				15	LPLLSK		PEP_FRAG_1	332	337	b3y1y5	3	6.2848	6.7278	0.0011	1	10	670.4513	3698.0
24668	670.4499	50.76	52.65	38.9309				3394	3088		2674	2578			2233			5345		4136			3844	3392	3793		3188	4194	2882	2670	2621				21	LPLLSK		PEP_FRAG_1	332	337	y4y5	2	6.7278	6.7278	0.0011	8	10	670.4508	2847.0
24679	670.4877	46.99	48.62	103.04				1784	2091	2176			2063		1921	2156	3441	2317		1268		1562	1987	2239	1914	2214	1850	2018							21	VIIVVK		PEP_FRAG_1	535	540	b2b3y6	3	5.5476	5.5476	0.0020	5	7	670.489	1468.0
24683	670.4872	49.54	48.99	102.294																												1921	1600	1837	30	VIIVVK		PEP_FRAG_1	535	540	b2b3y6	3	5.4639	5.5476	0.0020	2	7	670.4858	1169.0
24702	671.34	84.41	84.72	97.407						1067			1185								1194	1410													17	AFSLSF		PEP_FRAG_1	336	341	b3b3∞	2	4.8814	4.8814	0.0030	2	2	671.3405	1266.0
24710	671.4214	29.02	28.14	97.5158	21769	25405																										30875	29065	19890	28	VGQVIR		PEP_FRAG_1	294	299	b3b4y2y3y4y4*y5y5*y6*	9	8.6551	8.6551	0.0000	5	7	671.4227	27091.0
24713	671.4203	29.12	27.97	37.906			3872																												3	VGQVIR		PEP_FRAG_1	294	299	y5	1	6.8646	8.6551	0.0000	1	7	671.4203	3872.0
24719	671.425	34.36	33.39	40.82		1341																													2	LGVQVR		PEP_FRAG_1	102	107	y5*	1	5.5306	6.2319	0.0013	1	3	671.425	1341.0
24740	671.4079	31.71	30.76	37.933																												1171			28	AASVPVK		PEP_FRAG_1	726	732	b3	1	5.2064	5.2064	0.0027	1	2	671.4079	1171.0
24751	669.431	38.57	40.45	100.915					7422	6979	6947	6986	5771	9672	8873	9476		8007	9253	8626	7859	8046	12200	12146	11332	9102	9449	9602	7764	8235	8337				21	GGVPLVK		PEP_FRAG_1	306	312	b4b5b6y2y4y7	6	7.7843	7.7843	0.0000	21	25	669.4308	11213.0
24762	670.4261	55.41	56.71	102.814				8003	8843	9974	7617	7442	9623						2545	4328		3839	9481	9180	9627	5775	5077	5118	5821	6059	5396	9269	9640	8598	24	ALPLTR		PEP_FRAG_2	396	401	b6y3∞y6	3	4.7563	4.7563	0.0030	2	3	670.4266	3452.0
24768	671.4225	30.29	32.79	40.6366				5577																		15267	12792	14303	7335	10332	12942				24	LQVVGR		PEP_FRAG_1	70	75	b2b3y1y3y4y5y5*	7	8.3777	8.3777	0.0000	6	11	671.4222	12780.0
24773	671.4453	44.5	43.78	37.433		3999																													2	IANILK		PEP_FRAG_1	104	109	b3b4y2y5y5*	5	7.2169	8.1571	0.0000	1	12	671.4453	3999.0
24781	671.4471	43.36	42.99	103.759									20896																						9	INALIK		PEP_FRAG_1	28	33	b2b3b4y2y4y5*	6	7.7194	8.3616	0.0000	1	11	671.4471	20896.0
24787	671.4464	66.34	67.5	103.366																									3162	3153	2856	8390	8274		28	QIGIIK		PEP_FRAG_1	307	312	b2b4y2y4y6	5	6.8483	7.8289	0.0000	2	10	671.4449	6551.0
24802	670.3799	37.98	39.63	40.0007		45538	43202	51903	49249					24611	31921	30838		40076	39068							49137	51409	50883	76276	74279	71716				26	DPLQVV		PEP_FRAG_1	372	377	b3b6y6y6*	4	5.8053	5.8053	0.0016	1	5	670.3793	52744.0
24804	670.3786	38.66	39.75	101.49						14324	63867	54741	21102							24100	23113	21440	17209	17346	17675							5794	5928	6321	28	DPLQVV		PEP_FRAG_1	372	377	b5y6	2	5.7539	5.8053	0.0016	1	5	670.3788	4063.0
24808	672.3754	28.72	27.84	38.4487																												17731	17984	18407	30	LPPSMK		PEP_FRAG_1	1000	1005	b5y5	2	6.3215	6.3215	0.0013	1	2	672.3748	15423.0
24810	672.3968	28.07	27.25	38.018																												1677	4473		29	LPDVTK		PEP_FRAG_1	331	336	y5	1	6.4114	6.5725	0.0011	1	2	672.3972	1934.0
24811	671.4469	42.41	44.4	39.2023				3416				1962				1311			1888	2655			2643		4146	2898	2279	2766	2225		1958				15	ILGAVAK		PEP_FRAG_1	824	830	y5	1	6.153	6.9997	0.0007	1	6	671.4442	1487.0
24826	671.4463	66.97	68.12	103.293						2161			1982					2264	3847	1969	3132		2958	2254	2398	2258	1882	1657				2104		2431	17	ILGAVAK		PEP_FRAG_1	824	830	y3y5y7	3	6.7898	6.9997	0.0007	1	6	671.4447	4313.0
24833	671.422	33.58	36.01	39.1731				2477	2814		2483	2220			2886	2614		2300	2621	3105	3152		2340	2227	2052	2095	2224	2519	1931						5	LGVQVR		PEP_FRAG_1	102	107	y3	1	6.2319	6.2319	0.0013	2	3	671.4229	1791.0
24834	672.3888	33.18	35.03	98.103													4936																		13	SVPELK		PEP_FRAG_1	125	130	y4y6	2	6.756	7.7178	0.0000	1	15	672.3888	4936.0
24839	672.4072	32.15	34.07	102.894								4155	5839			3347		3111		4505															8	VVNVGGK		PEP_FRAG_1	49	55	y3	1	5.7544	6.487	0.0011	1	5	672.4084	2307.0
24843	671.4481	43.39	45.29	40.9866										6655				38360								8494	9276				6365				14	QIGIIK		PEP_FRAG_1	307	312	b2b4*b6y2y3y4y6*	7	7.8289	7.8289	0.0000	3	10	671.4487	22962.0
24846	671.4486	43.38	45.46	101.128																									10588						25	QIGIIK		PEP_FRAG_1	307	312	b6y4y6*	3	6.8097	7.8289	0.0000	1	10	671.4486	10588.0
24847	671.4475	46.34	45.73	99.8793																												15703	15200	19552	28	INALIK		PEP_FRAG_1	28	33	b3b4y3y5y6	5	7.3093	8.3616	0.0000	1	11	671.4477	12389.0
24891	672.3335	34.31	36.03	93.4556				7995	6352	7208	6105	5672	7811	2663	3602		3732			7943	7878	8751		9392	9803	6457	7983	6295	7985	7262	7834	7652	9705	6178	22	DPAVDR		PEP_FRAG_1	8	13	b6y5y6	3	5.9623	5.9623	0.0015	1	2	672.3338	4876.0
24906	672.3579	44.34	43.26	99.81			3048																												3	EDLAPK		PEP_FRAG_1	226	231	b3y3	2	5.6385	5.6385	0.0016	1	2	672.3579	3048.0
24908	672.3943	32.77	35.22	98.234							7577	8137			6054	6199		5557		6304			5572	5685	7471	7818	6685	8108	5900	5235	6931				22	SVPELK		PEP_FRAG_1	125	130	b4y2y3y4y6	5	7.7178	7.7178	0.0000	13	15	672.3941	6179.0
24927	671.4107	35.41	37.12	101.421				39855	40387	39584	61159	55897	60495	21227	34121	34555	41450	40242	47817	48285	49048	43874	45222	43778	45243	46031	40843	41547	47383	42344	39035	21288	24843	23933	20	ASLPGVK		PEP_FRAG_1	67	73	b3∞b5b5∞b6b6∞b7y2y3y4y5y6	11	8.9715	8.9715	0.0000	27	30	671.4113	47177.0
24930	671.4075	36.85	38.04	101.425									10283				5206								6223										21	LPSLNK		PEP_FRAG_1	60	65	b3y5y6	3	6.9061	7.686	0.0000	2	22	671.4082	5830.0
24931	671.4089	38.63	37.42	36.878	1462																														1	ASLPGVK		PEP_FRAG_1	67	73	y4	1	6.5656	8.9715	0.0000	1	30	671.4089	1462.0
24947	672.405	55.13	56.52	97.9448				5778	5805	6557	4254	3749	4956		3359	3223	1987			3733	3637	3481	5709	5426	5817	2683		2660	2270	1900	2157	3839	4397		26	LIVDGR		PEP_FRAG_1	48	53	b3y6	2	5.8751	8.1163	0.0000	1	2	672.4048	1134.0
24949	672.4418	51.77	51.26	39.0867																												4746	4314	6748	28	IGLLTR		PEP_FRAG_1	131	136	y4y5	2	7.4675	7.9304	0.0000	3	21	672.4416	3212.0
24951	672.4317	55.63	55.29	102.024																												4917	5756	6033	29	GEILLK		PEP_FRAG_1	231	236	b3b4y3y6	4	6.4022	7.1081	0.0006	1	12	672.4325	3881.0
24955	672.4371	46.26	47.67	100.058		34206	34422	66340	65421	81031	61245	58006	85436	69354	68450	76147	54007	42683	77037	60423	84077	79398	63209	62753	59142	80244	76427	77796							6	LALISR		PEP_FRAG_1	2	7	b3b5b5∞b6y1y3y5y6	8	6.4525	6.7297	0.0011	4	5	672.4396	225085.0
24972	672.4308	40.53	42.09	104.023				4416		2878	3996	3934	2126			2589								2167			4520								8	VELLAK		PEP_FRAG_1	347	352	b2b3y3	3	6.1827	6.785	0.0011	1	3	672.4318	2228.0
24973	672.4303	39.99	42.04	40.0874					3958						1323			3739								2306		4527							24	VELLAK		PEP_FRAG_1	347	352	b2b3y2y3y5y5∞	6	6.7382	6.785	0.0011	1	3	672.4299	3162.0
24976	672.4306	70.98	72.42	101.467				5537	4519	4474	9465	8728	8739				6550	4650	5518	4579	4782	4666	7343	7593	7048	11219	10310	10313	7155	6478	6417				5	LLDIAK		PEP_FRAG_1	211	216	y4∞	1	4.8821	6.4846	0.0011	3	7	672.4303	2917.0
24977	672.4313	58.28	59.25	104.821	5461	5259	4438		3616	3726	3155	3289	3853		2743	2645	2529		3332				3941	3465	4282	3382		3273	3240		2551	4433	4277	4796	27	DLALLK		PEP_FRAG_1	200	205	y4	1	6.4767	6.4767	0.0011	1	16	672.4308	1366.0
24978	672.4305	41.64	40.71	101.689	11897	8423	10229																									7253	6922	8067	30	VLEALK		PEP_FRAG_1	15	20	b3b4y2y3y4y5y6	7	8.0098	8.6568	0.0000	1	16	672.4292	5709.0
24983	672.4241	76.07	77.12	98.465													1560																		13	DLALLK		PEP_FRAG_1	200	205	b3	1	4.6009	6.4767	0.0011	1	16	672.4241	1560.0
24984	672.4396	48.5	49.7	102.61	5980	5248	5668	16919	15232	13090	17152	15236	12644	9197	10723	10109	12721	10357	13092	13488	13422	11974	15881	18583	16966	15607	15905	12493	12642	13247	12216	13721	13332	13252	20	GTLLIR		PEP_FRAG_1	34	39	b3∞b4b6y2y3	5	6.6738	6.6738	0.0011	8	9	672.4414	18374.0
24986	672.4324	50.66	50.15	102.492																												1926	1878	3480	30	LLDIAK		PEP_FRAG_1	211	216	b3y4	2	6.0216	6.4846	0.0011	1	7	672.4311	2210.0
24995	672.4325	65.67	67.24	102.262				3601	3324	2730	2227	2582	3271	2491	3584	4134	3151	2177		4955		3055	3274	3798	3666	2857		2695	3518	2974	2884				5	DLALLK		PEP_FRAG_1	200	205	b4y6	2	5.4958	6.4767	0.0011	1	16	672.4339	2125.0
25002	672.4425	48.7	50.57	39.2743				5315	4784		3290	3382		3074	4117	4371		4973	4502	5801			6148	4759	4322	4592	4471	5024	3096	3471	4586				19	IGLLTR		PEP_FRAG_1	131	136	b3y1y3y4y5	5	7.9304	7.9304	0.0000	18	21	672.4428	5202.0
25019	672.395	39.35	41.3	104.791				2521	3040		3328	3160	2732	3647	4027	4471	2954	2695		4179		4340	4306	4206	4130	4229	4083	4532	3050	3381	3134				19	LTPVDK		PEP_FRAG_1	968	973	b3∞y6	2	4.4732	5.5393	0.0016	1	4	672.3959	3531.0
25027	673.3905	27.3	26.41	38.3695	24360	28005	25307																									24940			28	VDLQAK		PEP_FRAG_1	299	304	b2b3b4y2y3y3*y4y5y5*	9	8.6212	8.7456	0.0000	3	5	673.3905	22022.0
25029	673.3927	27.28	26.4	102.071																													20981		29	VDLQAK		PEP_FRAG_1	299	304	b2b3b4b5y1y3y3*y4y5	9	8.6867	8.7456	0.0000	1	5	673.3927	20981.0
25032	673.3343	31.19	30.34	35.4463																												2622	3079	4562	28	GPDAWK		PEP_FRAG_1	193	198	y4	1	6.3748	6.3748	0.0013	3	6	673.3337	1831.0
25033	673.39	27.28	26.44	101.872																														21119	30	VDLQAK		PEP_FRAG_1	299	304	b2b3b3∞b4b5y2y3y3*y4y4*y5	11	8.7456	8.7456	0.0000	1	5	673.39	21119.0
25051	673.3642	30.16	32.53	97.5348				19214	18569	22366	17675	18441	17388	14712	23270	23497		14252	14455	23886	19253	20782	19852	19963	17692	16197	16221	15223	17863	17829	18224				5	SAGVPSR		PEP_FRAG_1	53	59	y3∞y7	2	6.1509	6.9948	0.0007	2	10	673.3648	13892.0
25059	672.3379	44.19	45.92	98.7002				6921	6175	5953	4498	4416	4918	3229	3824	4012				3300	2970	3205	12615	11845	11363	3195			8469	7459	7964				18	MPEPAK		PEP_FRAG_1	1	6	y2y3y6	3	6.5856	6.5856	0.0011	1	2	672.3372	4024.0
25061	673.3912	38.59	37.68	96.4362	28651																											20966	21419	20987	28	TPNITK		PEP_FRAG_1	256	261	b2b4b5b5∞b6y4y5y6	8	6.3075	6.7125	0.0011	3	10	673.3923	16667.0
25068	673.3651	37.12	39.28	36.7757										4125	4511	4016		3837			2351				2771				1771	1818	1796				12	SAGVPSR		PEP_FRAG_1	53	59	b4b4∞y3	3	6.9948	6.9948	0.0007	8	10	673.3648	3330.0
25072	672.2791	32.7	34.26	95.3667	23326	21768	19201	62579	59010	32505	156003	56707	135118				62086	99455	94771	3397	36006	4919	7236	4555	5117	43967	43980	20787				1805	3756	2151	17	SGAMVK	Phosphoryl STY(1)	PTM	29	34	b4b5b5∞y2y6	5	6.5431	6.5431	0.0011	8	8	672.2782	25666.0
25079	672.4075	35.81	38.06	100.52							1416																								7	LIAAER		PEP_FRAG_1	168	173	y4y6	2	6.2084	7.7156	0.0000	1	6	672.4075	1416.0
25084	672.4054	57.56	59.0	100.53				6283	4749	2687	3733	2063	2763						4382	6330	5784	5848	5737	6528	5287	1993	2403	2430	2475	3785	4533	4032	4064	4879	15	GGILANK		PEP_FRAG_1	517	523	y2*y3y7	3	5.1973	5.4315	0.0024	1	2	672.4047	1758.0
25087	672.4424	48.79	48.13	99.73	32979																											57177	54080	57355	28	LALISR		PEP_FRAG_1	2	7	b3b5b6y1y3y6	6	6.7297	6.7297	0.0011	1	5	672.4423	47785.0
25134	673.4258	34.44	36.6	104.586				5876	6129		6476	5696	5640		5595	5406	4046	3048	4818	6188	4940		4270	4244	4272	4452	5731	5758	4771	4250	3112				16	TAIGALK		PEP_FRAG_1	116	122	b2b5y4y5y6	5	7.4647	7.4647	0.0001	13	15	673.4277	7106.0
25139	673.4228	34.57	36.58	37.87																		7059													18	TAIGALK		PEP_FRAG_1	116	122	y4y5	2	6.7505	7.4647	0.0001	1	15	673.4228	7059.0
25146	674.3841	27.32	29.06	97.1249	12525		11511													2155			1795	2040	1766		3882								1	ASGLAAGK		PEP_FRAG_1	149	156	b5y3	2	5.0349	6.4152	0.0013	1	3	674.3845	3200.0
25157	674.3749	33.33	33.33	101.572						56840																									6	AVKDEL		PEP_FRAG_1	503	508	b2b3b4b4∞b5b5∞y4y5	8	8.2198	8.2198	0.0000	1	8	674.3749	56840.0
25181	674.3528	36.04	35.19	97.2178	15394	14441	12698																									17004	16968	15091	30	MDIPAK		PEP_FRAG_1	490	495	b3b5y6	3	5.9352	5.9352	0.0016	2	3	674.3538	11495.0
25182	674.4063	35.14	35.14	102.542						2963																									6	LAAMLR		PEP_FRAG_1	741	746	b4y3y4y5	4	7.0266	7.0266	0.0006	1	4	674.4063	2963.0
25192	673.424	49.23	50.65	101.103				1694		2353	5282	4745	5849	4196	5534	5391	3669			1221		1687						1519							6	AQTLLK		PEP_FRAG_1	414	419	b3b4y6	3	4.9364	4.9364	0.0029	2	2	673.4265	3932.0
25210	674.3745	31.19	32.94	102.047		16382	15468	4571	11060		14526	18173	4545	2595	13630	17125		19059	7676	7646		1580		2287	2606	21389	13393	20037	5684	10718	26633	15185	15603	13974	29	AVKDEL		PEP_FRAG_1	503	508	b4b4∞b5y4	4	7.6842	8.2198	0.0000	3	8	674.3751	11980.0
25219	674.4047	45.04	44.27	103.158																												2590			28	LAAMLR		PEP_FRAG_1	741	746	b3y6	2	6.4949	7.0266	0.0006	1	4	674.4047	2590.0
25221	674.3833	29.73	31.84	100.174				6623	7472	7662	4240	6339	5513	5000	6631	6366	4765	6767	5796	6957	6814	7166	7444	8840	8505	6653	6529	7041	4743	5418	5920	6601	7051	6994	5	ASGLAAGK		PEP_FRAG_1	149	156	y3y8	2	6.4152	6.4152	0.0013	2	3	674.3856	1063.0
25225	674.3847	42.34	43.43	96.6325				4659	3381	4575								2305					6281	5934	6075				4774			3880	3963	4565	21	DGTLIR		PEP_FRAG_1	273	278	y5y6	2	6.0419	6.1748	0.0014	1	4	674.3852	5443.0
25240	674.4012	46.08	47.9	102.342										4236	4711	5295		3876																	14	LAAMLR		PEP_FRAG_1	741	746	b3y6	2	5.5304	7.0266	0.0006	1	4	674.4007	1895.0
25242	674.4093	46.09	47.46	102.644				8172	7492	7361	6542	5028	5497	4933	5877	5870	7901	6707		7991		7865	8488	8245	7905	9557	9524	9355		8701		9302	10263	10217	10	LAAMLR		PEP_FRAG_1	741	746	y4y5y6	3	6.2478	7.0266	0.0006	1	4	674.4062	2172.0
25267	674.4258	54.52	54.17	107.866																												5721	6599	7788	29	FALVPK		PEP_FRAG_1	186	191	b2b3y2y6	4	6.5497	7.4947	0.0001	2	16	674.4262	4573.0
25300	674.4197	52.5	53.72	108.139													4383																		13	FALVPK		PEP_FRAG_1	186	191	b3y6	2	6.2689	7.4947	0.0001	1	16	674.4197	4383.0
25301	674.3497	28.96	29.01	95.3477								4770																				11166	11048	11932	29	DLGGNAK		PEP_FRAG_1	344	350	y5*y7	2	6.1241	7.066	0.0006	1	2	674.3505	8690.0
25325	674.4092	65.52	66.84	103.204				5552	5643	5627	4615	4848	4773	3813	4558	5014	3996	4224	6522	4425	5770	5653	6142	5657	5145	5933	5476	5414	5257	5125	4530	5376	5548	5719	5	TAELLK		PEP_FRAG_1	908	913	b4∞y6	2	4.7546	5.0202	0.0029	1	3	674.41	3749.0
25329	674.3824	45.18	46.58	96.4261				4791	4474	4683	3971	4264	4992			2448		3450	5699	5118	5307	6434	4340	4016	4256	4714	4936	4789	3829	3647	3367	3739	3968	4003	23	GELLSR		PEP_FRAG_1	90	95	y3∞y6	2	5.6092	5.6092	0.0019	1	2	674.3828	3238.0
25395	673.3913	35.28	37.31	96.7612				34426	32453	29204	32860	33574	32500	22782	30454	30245	29711	23040	31555	58742	48876	42454	39209	38864	34506	44342	37650	36499	63638	55941	57066				16	TPNITK		PEP_FRAG_1	256	261	b2b2∞b3b4b5b5*b5∞b6y4y4∞y5y5*y6	13	6.7125	6.7125	0.0011	7	10	673.3918	80736.0
25403	674.3832	33.28	35.51	99.6358				4436	4338		5572	5183	5711		4910	5151	7372	6791	7419	6191	5683	5976	5964		6222	5394	5003	5658	4211		4556				19	DGTLIR		PEP_FRAG_1	273	278	y5y6	2	6.1748	6.1748	0.0014	1	4	674.3839	5320.0
25413	674.426	52.13	53.77	108.414				5611	5247	4725	6110	5327	6532		3958	3620		3780	4067	2593			5097	5189	4644	5443	5252	4715	5293	5374	5616				15	FALVPK		PEP_FRAG_1	186	191	b2b3b4y2	4	7.4947	7.4947	0.0001	13	16	674.4245	3391.0
25420	675.3855	35.36	37.59	100.469							1837															2509		1895	1861		2019				22	NLVAMK		PEP_FRAG_1	46	51	b3y2y3	3	5.6482	5.7238	0.0017	2	3	675.3847	1691.0
25460	675.3687	45.63	47.42	96.1711				10026	9886	8485	10659	10085		10045	12736	12824		7038	7513	9255				10422	8476	10817	11078	9045	7162		7774				21	ANITSLG		PEP_FRAG_1	566	572	b2b3b4b5∞b6∞y4	6	7.3594	7.3594	0.0004	16	18	675.3688	7729.0
25467	675.3345	34.88	37.04	98.1625				6251	6117	5109	4790				6880		5451	4582	5420	6328	6096	5169	8324	7778	8238	6572	6400	6251	7384	6717	6467				16	EAAEQK		PEP_FRAG_1	187	192	b3y3y6	3	5.6901	5.6901	0.0017	2	2	675.3349	7259.0
25506	675.3827	51.12	52.74	99.4555				4523	5004	4948	3682	3433	4359	4184	4757	5057	5888	5847	5493	6095	5073		5689	5547	5565	5999	5573		5297	4764	4282				5	AGIWTK		PEP_FRAG_1	1387	1392	b3y2y3y6	4	6.0531	6.0531	0.0015	1	2	675.3823	3219.0
25513	675.368	44.03	45.49	97.8189				8875	8026	7179	6023	6473	6140	8506	9570	8941	8645	6870	8350	9234	6859	7400	10871	11133	11388	6967	7136	6451	5545	5450	5541	8895	8058	9211	21	DLTQAK		PEP_FRAG_1	613	618	b2y4	2	6.671	6.671	0.0011	7	7	675.3689	10851.0
25547	675.3852	47.55	49.44	100.073										4403	4924	4767				5779	5136		4757	5132	4971				5661		5387				16	NVAIMK		PEP_FRAG_2	113	118	y3y6	2	5.3194	5.3194	0.0026	2	2	675.3833	5825.0
25560	674.4461	53.79	54.83	106.785																	2091														17	TITLVK		PEP_FRAG_1	660	665	y4	1	6.0097	6.0097	0.0016	1	4	674.4461	2091.0
25592	676.3533	31.86	33.64	94.6319				6174	5448	4765		3675				4745		2658		7154					6790	6216	6047	5478		4733	5361	5953	6603	6337	21	ETADLK		PEP_FRAG_1	113	118	b6y3∞y6	3	5.5848	5.5848	0.0019	1	3	676.3514	6498.0
25596	676.3279	28.66	30.7	96.6684					3145		2087		2118		3703	3672	3783	3597	5539	4033	4150	3843	3823	4297	4038	3594	3260	6036	2942	2973	3832	3862	3458	3823	24	DSLADR		PEP_FRAG_1	392	397	b3y3y6	3	6.324	6.324	0.0013	7	7	676.3291	2298.0
25602	676.3512	33.57	35.98	98.3427											1583			2208												2126					11	ETADLK		PEP_FRAG_1	113	118	y4y6	2	4.876	5.5848	0.0019	1	3	676.3532	1290.0
25607	676.3171	33.44	35.54	92.4574					3901	3843	3542	3304	5001	2855	4610	4022	3873	3402		3736	4776	4222	4764	4881	4556	4596	4430	5121	3910	3236	3050				21	NITVDD		PEP_FRAG_1	351	356	b2b3b3∞y4	4	6.8612	6.8612	0.0011	11	12	676.3191	4046.0
25610	676.3746	33.57	35.76	103.571				2178			3822	3863	5254		2569	1953				3552			3138	3225	2946										19	LDAVMK		PEP_FRAG_1	133	138	y3y6	2	5.8875	5.8875	0.0016	1	4	676.3731	2488.0
25614	676.3735	36.87	35.99	99.944																													4826		29	DVMLAK		PEP_FRAG_1	529	534	b2b3b4y2y6	5	6.3798	6.3798	0.0013	1	6	676.3735	4826.0
25622	676.351	36.24	37.58	96.6673	12928	8754				4220	3394	3250	4648			5520	6958	6375								7844			7150	5468	6488				12	TELADK		PEP_FRAG_1	1269	1274	y3y4y6	3	7.219	7.219	0.0005	5	5	676.3524	5208.0
25631	676.366	39.11	41.06	96.6414				8102			5401		7419		6661	7032				8014						6558	6858	6666	6108	6348	5946				7	SVDSIR		PEP_FRAG_1	1017	1022	y4∞	1	4.7518	5.5072	0.0020	1	2	676.3668	3083.0
25635	676.3693	44.78	46.97	99.423																1123															16	DVMLAK		PEP_FRAG_1	529	534	y4y6	2	6.1524	6.3798	0.0013	1	6	676.3693	1123.0
25636	676.4042	35.99	37.95	102.546					2155	2820	2775	2363	4543		4065	4614	2591			3056		2645	3291	3300	3252	2186	2127	1946	2448	2083					11	YVIGPK		PEP_FRAG_1	309	314	y2y3y4y5y6	5	7.4235	7.4235	0.0003	16	21	676.4049	3441.0
25638	676.4028	35.84	37.7	37.724																	6066														17	YVIGPK		PEP_FRAG_1	309	314	y2y3y4y5	4	6.9868	7.4235	0.0003	1	21	676.4028	6066.0
25639	676.4051	35.96	37.86	37.925															3829																15	YVIGPK		PEP_FRAG_1	309	314	y3y4y5	3	6.7322	7.4235	0.0003	1	21	676.4051	3829.0
25652	676.3734	48.94	48.94	102.224						2432																									6	DLGIMK		PEP_FRAG_1	398	403	y4y6	2	5.8663	6.1921	0.0013	1	4	676.3734	2432.0
25657	676.3632	50.63	49.95	39.5075	5902	6206																											4949	4900	30	SVDSIR		PEP_FRAG_1	1017	1022	y4y6	2	5.5072	5.5072	0.0020	1	2	676.3637	3142.0
25676	676.3118	56.11	57.37	96.3785				1814	1742				1195						1344	1755	2545														9	NITVDD		PEP_FRAG_1	351	356	b4y6	2	5.1222	6.8612	0.0011	1	12	676.3128	1285.0
25684	676.3887	39.47	40.84	99.9429	208622	177527	230930	4316	3783	4194	3601	3554	4963	9313	8902	9444	7796	7620	10685	20028	23931	21754	19137	18181	17927	17378	17782	18172	8727	8799	9419		7319	8307	20	SLEVTK		PEP_FRAG_1	64	69	b3b4b5∞y2y2∞y4y6	7	7.0828	7.0828	0.0006	3	3	676.3902	18867.0
25722	676.3955	38.68	40.22	98.234													4012																		13	YGVIPK		PEP_FRAG_1	157	162	b3y6	2	4.9871	7.0049	0.0007	1	20	676.3955	4012.0
25749	677.3677	28.36	27.44	37.264																												15438	14297	15935	28	MSLAQK		PEP_FRAG_1	271	276	b3b3∞b4y2y3y5	6	8.1684	8.1684	0.0000	3	3	677.3685	13156.0
25753	677.312	38.31	39.73	90.6128	11846	11483		11298	10799	9822	9996	8088	8813	8353	10700	10237	6318	7759	7442	12141	12387	9864	14909	13787	13281	11658	12129	11545	12389	12682	12532	9617	9488	8842	11	SPTQGST		PEP_FRAG_1	152	158	b7y6	2	5.6939	5.6939	0.0017	2	2	677.3121	11339.0
25754	676.3666	44.25	45.94	98.077				12576		9914	11904	11541	12142	10783	12406	11141	10233	9034	11004	14993	14055	13598	13084	12423	11713	11457	11192	10507	13057	12366	13307				16	DGFIPK		PEP_FRAG_1	45	50	b3b4y2y3	4	7.2952	7.2952	0.0005	22	24	676.3659	17500.0
25756	676.368	47.07	46.36	97.5063																												5509	5900	6038	30	DGFIPK		PEP_FRAG_1	45	50	b3y2	2	6.2015	7.2952	0.0005	1	24	676.3684	4076.0
25775	677.3526	60.93	60.9	97.714																														1063	30	LVFPSD		PEP_FRAG_1	474	479	b2y3y4	3	6.4584	6.4584	0.0012	1	6	677.3526	1063.0
25779	677.3529	59.06	60.63	98.2786																1902			1484	2197	1708								1798		29	LVFPSD		PEP_FRAG_1	474	479	y3	1	5.831	6.4584	0.0012	3	6	677.3552	1160.0
25850	678.3843	29.16	28.02	102.359	1763																														1	YIPGTK		PEP_FRAG_1	75	80	y4y4∞	2	7.069	7.6995	0.0000	1	4	678.3843	1763.0
25851	678.3837	29.29	28.06	101.895		2079																													2	YIPGTK		PEP_FRAG_1	75	80	y4	1	7.143	7.6995	0.0000	1	4	678.3837	2079.0
25855	678.3843	29.09	28.28	101.709																												5196	6678	5541	30	YIPGTK		PEP_FRAG_1	75	80	y3y4y4∞y6	4	7.6995	7.6995	0.0000	1	4	678.3834	4049.0
25887	678.3838	30.82	33.21	107.39				2032	1892		2351	2502	3238		3860	3739	4089	2035	1604	3241	2670		1925	2082	2186	2534	2201	3056							9	YALSPK		PEP_FRAG_1	258	263	y2y3y4	3	6.7679	6.7679	0.0011	6	7	678.3826	1989.0
25897	678.3482	40.47	41.86	99.045															1732																15	ETLMGK		PEP_FRAG_1	101	106	y2y3	2	6.2351	6.6859	0.0011	1	6	678.3482	1732.0
25904	678.3547	37.11	39.26	97.8693							2628				1557					1936	2777	2281		1761	1442	1565		1460							16	ETLMGK		PEP_FRAG_1	101	106	b3y6	2	6.2919	6.6859	0.0011	1	6	678.3522	1760.0
25917	678.353	33.45	32.45	38.7823	22790	20562	17141																												2	MDLTAK		PEP_FRAG_1	313	318	y2y3y5	3	7.4438	8.3753	0.0000	2	5	678.3528	5891.0
25918	678.3486	30.44	32.53	102.517				8367	7992	8782	6031	5715			4430	4526	7246	4748	6974	13211	11005	12738	10454	10704	12497	9964	9437	11116	7989	8250	8565	18786	21103	19221	29	MDLTAK		PEP_FRAG_1	313	318	b2b3b4∞y2y3y4y5	7	8.3753	8.3753	0.0000	3	5	678.35	16550.0
25922	678.3809	37.96	39.93	100.547				2898	2953	3033		2892		2626	5096	4797	6988	5249	5986	3934	3727		3321	3560	3355	3368	3460	3379		2435					12	EGFVVK		PEP_FRAG_1	9	14	b3b4b6y6	4	7.014	7.1911	0.0006	11	13	678.3821	4237.0
25928	678.3682	35.12	34.16	99.3443																												8291	8243	9564	29	VMMVAK		PEP_FRAG_1	283	288	b2b3b4y2y3y4y6	7	8.0156	8.0156	0.0000	3	5	678.3686	5897.0
25945	678.3838	33.62	36.05	37.1089				4017	8175						3196	3263			3182	4930	3648	3194		3636	3256	3912			2315						5	LAEAFK		PEP_FRAG_1	301	306	b3y2y3y4y5	5	7.34	7.7002	0.0000	7	14	678.3859	5743.0
25965	678.3221	48.19	49.19	103.427						1597			2072						2126	1770	2829	2176													15	GSEVMR		PEP_FRAG_1	239	244	b6y3	2	5.4264	5.4672	0.0020	1	2	678.3239	1708.0
25979	678.4198	41.38	43.39	104.031				2120	1841							2429				2018	2286														16	ALAIYK		PEP_FRAG_1	632	637	b3y1y6	3	5.3848	5.7418	0.0016	2	5	678.4189	1763.0
25999	678.3834	52.32	53.94	101.752						3593	4499	3895					3481	3335	3902	4431	4278	4778	5216	5205	4765	7092	6215	5923	5046	5231	4750				17	EGFVVK		PEP_FRAG_1	9	14	b4y5y6	3	7.1911	7.1911	0.0006	1	13	678.3808	6986.0
26026	678.3836	43.03	44.77	100.864				88409	80152	87031	79873	73528	79022	83658	93593	97857	166728	125426	166406	101438	106552	91161	108463	106011	104704	97915	96403	92801	76086	79696	79803				16	GVFEVK		PEP_FRAG_1	260	265	b2b3b4b4∞b5b5∞y1y2y3y3∞y4y4∞y5y6	14	9.1205	9.1205	0.0000	24	28	678.3848	133255.0
26052	678.3488	31.78	30.95	38.8094	4559					2877																						7117	7368	6892	6	TLADMK		PEP_FRAG_1	742	747	y4	1	5.6223	5.6223	0.0022	1	2	678.3515	5009.0
26069	678.4193	44.68	43.78	103.325																														1884	30	ALAIYK		PEP_FRAG_1	632	637	b2b3y2	3	5.7418	5.7418	0.0016	1	5	678.4193	1884.0
26091	679.317	25.65	27.47	95.0975					1793	3100											3612	3335	4052	4026	3853	2292	2228	3010	2039	2176		3468	2991	2998	6	DQGGFR		PEP_FRAG_1	257	262	y4	1	6.7584	6.895	0.0010	2	10	679.3178	5493.0
26097	679.3437	34.52	33.66	98.1047																												35825	33665	37011	30	QAFGEK		PEP_FRAG_1	180	185	b2b2*b3y3y3∞y4y6	7	6.715	6.8883	0.0010	2	5	679.3437	29665.0
26122	679.3165	44.85	46.57	94.1451				1712	1683	2804					1706		3143	2082	4169	2191		2715	2697	2261		2011	2039	2265							20	DQGGFR		PEP_FRAG_1	257	262	y4y6	2	6.895	6.895	0.0010	7	10	679.3175	1812.0
26173	679.3434	30.35	32.92	98.7113				5016	11753		8642	10285		3106	9972	13138		9468		14484			5315		7155	26476	22581	23684	8086	13156	30447				22	QAFGEK		PEP_FRAG_1	180	185	b2b2*b3y1y3y4y6	7	6.8883	6.8883	0.0010	3	5	679.3431	23949.0
26205	680.3992	32.36	31.52	101.641																												5822	6810	5928	28	LASYVK		PEP_FRAG_1	249	254	b3b3∞b4∞y2y3y4y6	7	7.2976	7.2976	0.0005	3	6	680.3982	4268.0
26216	680.3385	29.2	30.51	98.2304						5385					3597	3962										4848	3793	3941			3958	5696	5105	5433	24	DGYAVR		PEP_FRAG_1	374	379	b4y2y6	3	5.7612	6.2443	0.0013	1	2	680.3394	2709.0
26247	680.374	35.21	34.3	38.1133	8768	8944	4580																												3	VSFATR		PEP_FRAG_1	366	371	y4y5	2	6.6382	8.3824	0.0000	3	29	680.374	1060.0
26248	680.3722	31.86	33.78	98.4155				14403	12927	16599	20696	21964	29551	16422	34415	35833	43278	37604	36629	38055	35691	29530	18625	16959	22134	17418	17883	20915	20000	17585	16711	7372	7602	8073	17	VSFATR		PEP_FRAG_1	366	371	b2b3b3∞b4b6y1y2y3y4y5y5∞	11	8.3824	8.3824	0.0000	26	29	680.3734	58375.0
26261	680.3285	29.93	32.11	37.7937				18344	15623			12941			16268			12077					19533	20465		15899	16639	15758	14164	13029	13788	6148		10983	14	SMSVEK		PEP_FRAG_1	156	161	b4y2∞y4	3	5.5938	5.5938	0.0019	2	3	680.3292	6648.0
26263	680.3277	30.52	32.11	98.293						13962	12409		7703	15064		15481			12879	21628	18305	13378			10934							5780	6196		29	SMSVEK		PEP_FRAG_1	156	161	b4b5y6	3	5.2962	5.5938	0.0019	1	3	680.3295	4296.0
26272	679.3776	41.69	42.91	100.395				7561	6139	7003													6530	6428					3402	2673			2707	2895	30	VFGASAK		PEP_FRAG_1	203	209	y5y7	2	5.6698	5.6698	0.0017	1	2	679.3776	1846.0
26284	680.3818	49.21	48.54	102.669																												7237	7337	8337	29	LAAFMK		PEP_FRAG_1	357	362	b3b4y2y4y5	5	7.509	8.1419	0.0000	2	19	680.3832	5200.0
26285	680.3629	38.7	40.18	102.218	4250			5165	5257	4900	4759	3485	4504	3540	4726	4994	7854	6358	8235	6721		6131	5855	5637	5604	7153	7118	7252	4341	4599	4769	6901	6455	6907	28	YLAADK		PEP_FRAG_1	69	74	y2y2∞y4y6	4	6.4229	6.4229	0.0013	2	4	680.364	4967.0
26286	680.3637	40.69	39.66	37.184	16616	17947	15508																												1	TLDGFK		PEP_FRAG_1	462	467	y3y4y5	3	7.9041	8.542	0.0000	3	22	680.3628	4316.0
26288	680.3646	37.0	39.0	102.806				3973	2009		6057	6646	6499		1769		5297		4719	8614	5330		8416	7807	7532	14284	15242	16095	7650	7124	7349				24	TLDGFK		PEP_FRAG_1	462	467	b2b2∞b4y1y2y3y4y5	8	8.542	8.542	0.0000	14	22	680.3646	14580.0
26290	680.3637	36.95	39.1	37.6														1011																	14	TLDGFK		PEP_FRAG_1	462	467	b1∞y4	2	7.6554	8.542	0.0000	1	22	680.3637	1011.0
26291	680.3634	40.41	39.59	102.862																												2433			28	TLDGFK		PEP_FRAG_1	462	467	b2∞y1y3y4y5	5	8.1179	8.542	0.0000	1	22	680.3634	2433.0
26293	680.3656	40.45	39.54	102.276																														2460	30	TLDGFK		PEP_FRAG_1	462	467	y1y3y4	3	7.5395	8.542	0.0000	1	22	680.3656	2460.0
26315	680.363	40.23	41.76	101.126				19459	19814	17401	11997	12400	11204	14901	14245	13686		2795	4327	7652	7361	7044	22268	22306	21867	12576	11523	11173	16274	15611	16114	17485	19205	20489	4	FGSLEK		PEP_FRAG_1	270	275	y5y6	2	5.7976	5.7976	0.0016	3	3	680.364	15016.0
26326	680.3736	52.28	53.72	99.1242														2455	4016		3068	2847					1899	1883							15	IASSFR		PEP_FRAG_1	177	182	y4y5y6	3	5.762	5.9118	0.0016	1	2	680.3738	3331.0
26345	680.3602	47.82	49.57	96.3661				5552			7516	7302	7685		3303	3240	6265	4367	6096	9552	8876		9487	8990	9588	13073	13789	11306	7169	7792	7267				19	YAEVAK		PEP_FRAG_1	893	898	b3b6y3y6	4	6.0719	6.0719	0.0015	2	4	680.3623	8582.0
26346	680.3827	46.05	47.89	39.1598				3791	7517		3143	2764						2565										9641							24	LAAFMK		PEP_FRAG_1	357	362	b2b3b4y2y4y5	6	7.7951	8.1419	0.0000	2	19	680.3819	7891.0
26364	680.4465	30.07	29.12	38.02																												4751	3865	4553	30	LVALHK		PEP_FRAG_1	112	117	y2y4y5	3	6.5352	6.5352	0.0011	3	3	680.4466	3138.0
26377	681.3216	25.39	25.06	89.4963																												1504	1710	1550	29	SDGQFK		PEP_FRAG_2	276	281	b4	1	5.4326	5.4326	0.0024	2	2	681.3215	1202.0
26452	681.3161	52.93	54.3	95.9332				5416	5464	4235	2365	3080	3163	6709	8052	8089	4117	4082	4398	9772	7623	7318	9013	9161	8739	8583	8170	7973	7383	7308	8690	9530	9188	9177	20	GGFNMR		PEP_FRAG_1	710	715	b6y4y6	3	6.6704	6.6704	0.0011	12	13	681.3163	8286.0
26463	680.3819	46.27	47.89	103.205						3917			3979	6863	8996	8768	4471		5360	11687	8584	4718	6893	6772	6634	10410	9008		10560	11119	10949				12	LAAFMK		PEP_FRAG_1	357	362	b2b3b4y2y3y4y5	7	8.1419	8.1419	0.0000	15	19	680.383	8486.0
26468	682.3724	27.63	26.96	37.375																												5633	5504	6082	28	GMLPHK		PEP_FRAG_1	86	91	y2y3y4	3	7.1094	7.1094	0.0006	3	3	682.3723	4325.0
26495	681.4313	33.42	35.52	104.297				7070	6566	5137	5718	5380	5485		3338	3120				3154	3163	3051	9102	8472	9626			1762	3490	3156	3234				5	LPGIPGK		PEP_FRAG_1	164	170	b3y7	2	5.2307	5.2307	0.0027	2	5	681.4322	4453.0
26496	682.3087	30.47	32.79	98.5055						2226								3996	5826	4905	4251	5031	2088	2184	2259	2649	2452	2271							16	DESGFK		PEP_FRAG_1	110	115	b4y2y3y5y6	5	6.2775	6.2775	0.0013	2	2	682.3091	5461.0
26526	680.3997	65.25	66.56	105.151				7582	7416	7984	4103	5990	8709	5335	6503	5409	3447	3351	8484	5742	8260	8659	5402	5944	5648	3881	5863	5674	5833	5624	4327	20183	22978	17321	5	SFSLVK		PEP_FRAG_1	100	105	b4y1	2	4.7015	4.7015	0.0031	1	2	680.4009	5154.0
26585	682.4632	42.22	44.13	41.1632					2002									2375								1772		1649							24	IPVVVR		PEP_FRAG_1	402	407	y3y4y5	3	6.0056	6.0056	0.0015	2	6	682.462	1132.0
26586	682.4609	47.52	49.55	40.312																							1087								23	VPLVVR		PEP_FRAG_1	387	392	y5	1	5.9536	6.4572	0.0012	1	11	682.4609	1087.0
26656	682.3886	43.12	44.67	98.4331				6286	5383	6539	6037	4975	6862	4407	5122	5416	4206	3885	6241	8035	8149	8512	7095	5656	6103	6479	6989	6490	6983	7755	8114		5453	5493	19	GLHDIK		PEP_FRAG_1	191	196	b4b5b6	3	5.4724	5.4724	0.0020	3	3	682.389	6395.0
26732	684.3313	33.69	36.23	95.692																			1574												19	THQALD		PEP_FRAG_1	559	564	y4y6	2	4.9594	4.9972	0.0029	1	4	684.3313	1574.0
26777	684.3369	43.44	45.26	98.8045				3966	4105	4691	4563	4527			2627	2203	4808	4036	5801	5249	5188		6475	6300	6200	5789	6293	6400	4524	4533	4396				4	THQALD		PEP_FRAG_1	559	564	b4*	1	4.4529	4.9972	0.0029	1	4	684.3375	2582.0
26800	684.3877	43.03	44.92	40.5595				4448	6450			5727						3570	2388							11514		10923	6750						15	ALPPMR		PEP_FRAG_1	157	162	y4	1	5.6276	5.6276	0.0019	1	2	684.3859	1887.0
26813	684.4304	34.2	34.2	101.849						12597																									6	LPIVDK		PEP_FRAG_1	304	309	y2y3y5y6	4	7.2598	7.2598	0.0005	1	14	684.4304	12597.0
26819	684.4295	31.67	33.89	102.245				3513			5751		6873		3575	3919		3542									3813								12	LPIVDK		PEP_FRAG_1	304	309	y2y3y6	3	5.9873	7.2598	0.0005	1	14	684.4305	3377.0
26826	684.43	40.4	41.93	103.873									1937						1861	1725	2473	2749			1411										16	ELVVPK		PEP_FRAG_1	427	432	b3y2y6	3	6.0435	6.0435	0.0015	1	2	684.4312	1528.0
26831	684.4308	41.11	42.85	38.6318						1000	2645	2026	3613							3132			2200	3237	3047	6312	5841	5733	1842						21	LPIVDK		PEP_FRAG_1	304	309	y4y5	2	7.1816	7.2598	0.0005	8	14	684.4303	2431.0
26832	684.4298	43.17	42.47	102.88																												1785	1822	2165	30	LPIVDK		PEP_FRAG_1	304	309	y3∞y6	2	5.9319	7.2598	0.0005	1	14	684.429	1380.0
26833	684.4298	40.96	42.56	38.908																	3857														17	LPIVDK		PEP_FRAG_1	304	309	y3y4y5	3	7.0142	7.2598	0.0005	1	14	684.4298	3857.0
26834	684.4264	41.05	42.73	99.36																		1310													18	LPIVDK		PEP_FRAG_1	304	309	b3	1	5.9095	7.2598	0.0005	1	14	684.4264	1310.0
26842	684.4278	63.75	64.86	102.614																		3250													18	IIPVDK		PEP_FRAG_1	90	95	y4	1	6.2392	6.2392	0.0013	1	2	684.4278	3250.0
26847	684.4666	46.42	47.74	38.789															2686																15	LTPILK		PEP_FRAG_1	1020	1025	y4	1	5.8662	6.0057	0.0015	1	5	684.4666	2686.0
26866	684.478	61.75	61.17	41.104		3020																													2	LGIILR		PEP_FRAG_1	352	357	y3y5	2	6.8429	8.396	0.0000	1	7	684.478	3020.0
26873	684.4299	57.86	58.78	98.4348	8523	7370	9203			2381							2831			2529	2632	2594	4257	4652	4238	15023	12552	12862	2256			5107	5109	6202	30	IIPVDK		PEP_FRAG_1	90	95	b3	1	5.3434	6.2392	0.0013	1	2	684.4311	4126.0
26875	683.4466	54.84	56.32	102.595				2373	2366	3009	1801	1696	2957		2563	2182			3583	2436			2870	2553	2981	2333	2173	2288			1993		3403		27	QPVIVK		PEP_FRAG_1	120	125	b4y6	2	5.4768	5.4768	0.0020	2	2	683.4464	1079.0
26934	682.3685	53.97	55.56	101.326				3027		3134	2555	2184	3386			3265	7750	6522	7636	3377			3782	3830	3888	3673	3622	3510	2244	2057	1992				15	GFGFVR		PEP_FRAG_1	146	151	y4	1	6.5924	6.5924	0.0011	2	2	682.3687	7302.0
27072	685.4261	47.64	48.83	101.876					3250								2103			4292					3964						3108	3755	3793		21	AGLIPSK		PEP_FRAG_1	285	291	b5y7	2	4.8054	5.1127	0.0028	1	3	685.4274	3052.0
27078	685.4526	95.56	96.59	107.52																													13692		29	VLLLDL		PEP_FRAG_1	448	453	b2b3y2y2∞y3∞	5	6.0524	7.338	0.0004	1	29	685.4526	13692.0
27079	685.4523	95.69	97.19	108.735	14396																														1	VLLLDL		PEP_FRAG_1	448	453	b2b3y2y2∞y3y3∞	6	7.0929	7.338	0.0004	1	29	685.4523	14396.0
27088	685.4618	39.3	38.39	104.937																												6647	6896	7643	28	LAAIVAK		PEP_FRAG_1	19	25	b3b4y2y3y7	5	6.6291	7.2669	0.0005	3	17	685.4619	4768.0
27089	685.4523	95.6	96.9	107.741		78745	62105																									11766		15434	28	VLLLDL		PEP_FRAG_1	448	453	b2b3y2y2∞y3y3∞	6	6.9102	7.338	0.0004	4	29	685.4522	11966.0
27091	685.4616	45.89	45.1	108.995																												6126	5688	6877	30	VLIGVGK		PEP_FRAG_1	959	965	b2b4y3y4y5y6	6	7.3743	7.4749	0.0001	3	23	685.4623	4756.0
27127	686.3497	26.57	25.81	96.9157																												5690	5789	5397	28	GLDPER		PEP_FRAG_1	120	125	y3y6	2	7.0703	7.0703	0.0006	3	6	686.3497	4438.0
27132	686.3994	30.22	29.22	101.321		1540																													2	HVVFGK		PEP_FRAG_1	126	131	b3y4y6	3	7.1153	9.1669	0.0000	1	5	686.3994	1540.0
27134	685.4585	51.66	51.51	105.954									1961																						9	LQAIIK		PEP_FRAG_1	66	71	b4y6	2	6.1017	7.4326	0.0002	1	14	685.4585	1961.0
27137	686.4006	29.49	28.59	101.602																												29048	28874	29247	29	HVVFGK		PEP_FRAG_1	126	131	b2b3b4b5b6y2y3y4y5y6	10	9.1669	9.1669	0.0000	3	5	686.401	24069.0
27138	685.4618	35.85	37.84	105.287				12523	13560	7035	12291	12804	7826	2859	6562	6646				2610		2314	7983	8333	8301	5089	4577	4660	6535	5837	5588				7	LAAIVAK		PEP_FRAG_1	19	25	b2b3b4y2y3y5y6	7	7.2669	7.2669	0.0005	12	17	685.4621	7859.0
27139	686.3174	32.66	32.04	96.7757						81558																							63516	64758	29	YGDFGK		PEP_FRAG_1	127	132	b2b3b4b5y1y2y3y4y5	9	9.1352	9.3963	0.0000	3	29	686.3178	52593.0
27141	686.3176	33.23	32.26	40.21		2973																													2	YGDFGK		PEP_FRAG_1	127	132	y3y5	2	7.1076	9.3963	0.0000	1	29	686.3176	2973.0
27142	686.3178	33.08	32.24	40.349	2802																														1	YGDFGK		PEP_FRAG_1	127	132	y3y5	2	7.0838	9.3963	0.0000	1	29	686.3178	2802.0
27145	686.3165	32.97	32.37	96.96																												52635			28	YGDFGK		PEP_FRAG_1	127	132	b2b3b4b5b6y2y3y4y5	9	9.3093	9.3963	0.0000	1	29	686.3165	52635.0
27189	686.3428	38.49	40.06	96.558													4182																		13	GLDPER		PEP_FRAG_1	120	125	b5b6y5y6	4	5.6247	7.0703	0.0006	1	6	686.3428	4182.0
27199	686.3476	36.05	38.13	96.4501					3363								2548	2560	3925		5201		5077		4529	4276		4408			3184				15	DPEGLR		PEP_FRAG_1	117	122	y5y6	2	7.1213	7.1213	0.0006	3	4	686.3484	2897.0
27213	686.347	41.9	43.86	38.3428								1964												3837	2111			1782							21	LDPADR		PEP_FRAG_1	280	285	y4	1	5.4209	5.4209	0.0020	2	4	686.3482	1673.0
27228	686.4466	41.55	43.54	41.154				1666								2127										1806	1740	2067							12	IIDVVK		PEP_FRAG_1	304	309	y4	1	6.0392	7.0056	0.0007	1	10	686.446	1649.0
27239	686.4209	50.73	50.13	101.117		5593																										21365	21202	23877	29	DGLIIR		PEP_FRAG_1	47	52	b3b4b6y5y6	5	7.1327	7.252	0.0005	3	21	686.4227	16578.0
27255	685.4629	45.15	44.22	105.45	10544	10565	9384																									56957	65486	69063	29	GAIILAK		PEP_FRAG_1	153	159	b3b4b5b6y1y2y3y4y5	9	8.2253	8.5049	0.0000	5	13	685.4635	53561.0
27257	685.4623	42.91	44.36	38.893																	3935														17	VLIGVGK		PEP_FRAG_1	959	965	y4y6	2	7.1666	7.4749	0.0001	1	23	685.4623	3935.0
27258	685.4623	42.59	44.58	38.766				3971																											4	VLIGVGK		PEP_FRAG_1	959	965	b2y4y5	3	6.9693	7.4749	0.0001	1	23	685.4623	3971.0
27267	685.4263	35.33	37.05	101.953				30637	29693	39280	51816	50214	60626	16896	22386	26045		28306	32938	34578	35311	33485	25512	23814	25164	27672	24890	25815	20730	19397	17034	17901	18475	22138	9	AAVPSIK		PEP_FRAG_1	42	48	b2b3b4b5b5∞b6b6∞y3y3∞y4y4∞y5y5∞y6	14	9.0304	9.0304	0.0000	25	26	685.4252	75765.0
27268	685.4215	35.19	36.95	101.687													20035																		13	AAVPSIK		PEP_FRAG_1	42	48	b5b5∞y3y3∞y4y5y5∞y7	8	7.8781	9.0304	0.0000	1	26	685.4215	20035.0
27274	685.4514	94.56	96.15	108.073				13909	12208	12055	11461	12478	7193	13638	15780	17260	33205	28477	30226	8873	13240	13328	12055	10160	10144	21147	20099	22446	12463	12177	13120				15	VLLLDL		PEP_FRAG_1	448	453	b2b3y2y2∞y3y3∞	6	7.338	7.338	0.0004	23	29	685.4517	16437.0
27284	685.401	51.44	52.73	100.008			14644	158134	159225	233306	144960	149342	191437	146868	144548	141564	138761	121713	179680	153135	223859	225769	165119	149486	151929	169695	159815	154708	181813	161546	146385	138813	135265	158546	30	AAASPLR		PEP_FRAG_1	2	8	b6b7y2y3y7	5	5.6781	5.6781	0.0017	1	4	685.4014	131891.0
27287	686.3877	52.26	54.0	102.685				5034	4712	4457	4318	4409			4986	5420				4107	4934		6538	6195	5652	4732	3967	3899	4922	5410	4886				21	DSPVLR		PEP_FRAG_1	1243	1248	b4y6	2	5.1773	5.2236	0.0022	2	4	686.3864	4629.0
27295	686.4219	47.47	49.1	104.323				3139	2756	3094	2539		3468						2769	3259	3061	3430	4264	4113	3823	2615	2948	2638	2263	2277	2011				17	IGDILR		PEP_FRAG_1	926	931	y5	1	5.5454	5.5785	0.0023	1	2	686.422	4075.0
27300	685.4629	45.46	46.9	103.762				75697	74393	97312	67418	68585	79608	56540	60697	59791	50775	48881	78208	73849	89923	91255	74490	70972	72348	82086	80711	85420	74305	78833	78278	62034	64717	67167	21	GIVVGIK		PEP_FRAG_1	102	108	b2b3b4b5b6y1y2y4y5	9	7.9174	7.9174	0.0000	26	27	685.4631	74286.0
27303	686.4209	74.21	74.21	106.201						2059																									6	IGDILR		PEP_FRAG_1	926	931	b6y2y5y6	4	5.5785	5.5785	0.0023	1	2	686.4209	2059.0
27323	686.4202	81.26	81.58	106.45						1953									2415		1874	1677													6	DGLIIR		PEP_FRAG_1	47	52	y5y6	2	6.0274	7.252	0.0005	2	21	686.4195	2153.0
27325	686.3166	28.96	31.45	97.2884				115661	112795		125269	124420	80406	64937	110081	110387	88459	99248	66569	121477	42941	23387	88997	99576	91331	97023	99135	109441	83518	95963	93401				4	YGDFGK		PEP_FRAG_1	127	132	b2b3b4b5y1y2y3y4y5y5∞	10	9.3963	9.3963	0.0000	23	29	686.3176	97807.0
27413	687.4038	28.41	27.69	100.256	14713																														1	LIGDAAK		PEP_FRAG_1	50	56	y3y5	2	7.1278	9.5073	0.0000	1	5	687.4038	14713.0
27416	686.4204	43.65	45.09	101.841				4858	4348	4755	4055		5374	3414	4140	4086			6093	4923	5603	5227	5477	5464	5311	5158	4822	4786	3566	3755	4132	4782	5049	4687	11	VGEIIR		PEP_FRAG_1	22	27	y3y6	2	5.5712	6.5721	0.0011	1	2	686.4217	3318.0
27432	687.4053	28.25	27.34	99.701																												130676	133208	130490	28	LIGDAAK		PEP_FRAG_1	50	56	b2b3b4b5b6b6∞b7y1y2y3y4y5y5∞y6y7	15	9.5073	9.5073	0.0000	3	5	687.4057	119670.0
27434	687.4042	28.52	27.39	40.571		14671																													2	LIGDAAK		PEP_FRAG_1	75	81	y3y4y5y6	4	7.9131	9.5073	0.0000	1	5	687.4042	14671.0
27465	687.3794	42.8	42.4	100.105									2517																						9	ADLVNR		PEP_FRAG_1	375	380	b3y6	2	6.076	6.1004	0.0015	1	2	687.3794	2517.0
27476	687.3841	36.21	38.49	36.9437					1731						2909	2893				2467				2062	2231	2828	2683	2125	2139	1885	2127				23	DLGNLR		PEP_FRAG_1	289	294	y4*	1	6.4552	6.8217	0.0011	2	5	687.3826	1725.0
27488	687.3795	51.62	51.17	100.13																														1143	30	DGIINR		PEP_FRAG_1	418	423	b4y6	2	4.9727	5.6808	0.0017	1	8	687.3795	1143.0
27505	687.4084	56.85	57.85	102.395								2394	3245		2878		2290									2317		2001	2320	2229		3320	3449	3546	29	GLAVEAK		PEP_FRAG_1	42	48	b3b7	2	6.307	7.665	0.0000	1	3	687.4066	2221.0
27525	687.4428	32.5	31.63	105.828																												22810	24033	23054	28	VLLQSK		PEP_FRAG_1	31	36	b2b3b6y2y3y3*y3∞y4y4∞y5	10	8.4308	8.4308	0.0000	3	3	687.4421	18921.0
27537	687.3686	38.25	39.46	97.1519	15716	12498	14515				3059	2731	3498				7593	6296	8659	6534		6657	5756	5837	5520	10545	10750	10856	3465	3527	3299	3465	3161	3514	1	DPSAIGK		PEP_FRAG_1	266	272	y6y7	2	5.6393	5.6393	0.0016	1	3	687.37	4027.0
27606	687.4399	41.3	43.12	103.364				3824		3303	3175			2846	3969	4119		4595								4425	4154	4016		3308	3494				6	ALLGSVK		PEP_FRAG_1	757	763	y4y5y7	3	7.1062	7.1062	0.0006	6	9	687.4411	7783.0
27619	686.3492	38.56	40.14	96.4855				7583	10490	6820	9395	8533	5338	10996	10806	10125		8037		8341	9004	10577	9293	8613	13103	11197	11314	11716	11009	11749	11618	13096	13191	14971	7	GLDPER		PEP_FRAG_1	120	125	y1y5y6	3	5.5739	7.0703	0.0006	1	6	686.3508	5818.0
27629	688.4265	37.35	39.41	38.6538																1203		1317				1532		2074							16	LTDLVK		PEP_FRAG_1	140	145	b3y5	2	6.1908	6.5865	0.0011	1	5	688.4267	1092.0
27648	688.4241	39.26	38.3	98.779	32328																												9610	10287	1	DIISLK		PEP_FRAG_1	206	211	b3b3∞b6y3y4y6	6	6.0265	7.1133	0.0006	1	3	688.4247	9920.0
27659	687.4055	42.58	44.19	102.111	13635		10928	3850	3566	4328	2873	2805			1896	1986				3201	3634		5798	5335	5238	2972	3018		2649	2634	2772				3	QDLLAK		PEP_FRAG_1	539	544	b2b3y3y4y6	5	7.1741	7.1741	0.0006	2	2	687.4038	2508.0
27667	688.3894	37.18	39.07	102.05						2959		2067			1513						4046			3620	3628			2685	2980	2712					17	LVEEAK		PEP_FRAG_1	95	100	b4b6y4y6	4	6.7177	6.7177	0.0011	4	4	688.3881	5428.0
27672	688.3734	39.97	41.87	99.5755						4542		4533		3916	4883	5035				8190		5506		6377	6960			3450	5861	4851	6098				18	AEMLPK		PEP_FRAG_1	99	104	b3b4y6	3	6.1376	6.1376	0.0015	1	2	688.3715	8217.0
27682	688.3507	31.2	33.25	98.877													4646																		13	LLEQEG		PEP_FRAG_1	288	293	b3y3	2	5.3903	5.8609	0.0016	1	2	688.3507	4646.0
27687	687.3806	43.05	44.81	97.4029				6510	6546	6652	5530	5312	6279	5135	5592	6414		3897	6279	7198	7116	7041	8174	8195	7623	6930	6564	6129	6128	5844	6181				24	DGIINR		PEP_FRAG_1	418	423	y3*y6y6*	3	5.178	5.6808	0.0017	1	8	687.3815	4629.0
27696	688.4338	51.42	52.89	103.536				2511	2593	4084			3919								3795	4649	3189	2902	3300	1628		1970		2565					6	TSLVLR		PEP_FRAG_1	33	38	b3b3∞b4b6b6∞y6	6	6.3864	6.3864	0.0013	3	4	688.4341	10730.0
27699	688.4272	47.27	48.35	104.326	13020	13036	13313	1805	2237	2727	4801	3649	4983				2206		3875	3654	4478	4465	5603	5624	6161	5695	5637	5315	3899	3814	2878	2674	2784	3335	20	DVTLLK		PEP_FRAG_1	347	352	b3b4b6y4y6	5	6.1668	6.1668	0.0014	9	10	688.4247	4961.0
27703	688.4157	42.87	44.84	40.0299				2593	2358		3160	2879						2222	2162	4611	3308		2487	2668	2626	4270	5859	4200	2118	2151	2148				5	VPAFVR		PEP_FRAG_1	68	73	y5	1	6.8982	6.8982	0.0009	9	10	688.4155	1500.0
27721	688.4593	42.04	42.98	38.7912					3461	2535			1843							3596		2688				3083	1595					3561	3794		16	LLTTIK		PEP_FRAG_1	17	22	y4	1	6.3294	6.404	0.0013	3	4	688.4621	3246.0
27722	688.4599	40.89	43.07	105.223																			3474	3164	3021										20	LLTTIK		PEP_FRAG_1	17	22	b4∞y2y4	3	6.404	6.404	0.0013	1	4	688.4621	2583.0
27728	688.3842	34.33	35.83	100.645	13162	11420	11010	14809	13662	13111	16427	16375	19536	8624	8864	8769		9414	16105	19249	21317	20552	20796	21194	21013	23025	24108	26199	18524	14004	17623	10625	13505	13898	19	AEDIIK		PEP_FRAG_2	717	722	b2b4y2y4y6	5	6.6657	6.6657	0.0011	10	10	688.3858	20716.0
27729	688.4002	52.56	53.96	102.711				2422	2583	3574	2456	2123	3492	2263	2305	2137	3200	2863	4587		2868	3417	4294	3829	4052	2493	2337		3211	3575	3036	3253	2385		17	ETLGLR		PEP_FRAG_1	1323	1328	y3	1	6.1708	6.1708	0.0014	6	8	688.4005	3768.0
27737	688.4083	38.73	40.28	107.794					5430	3342	6737	7651	5220	6454	8165	8381	6371	7277	7502	11518	9860	9284	7212	6629	6325	12315	15083		12034	12212	12464	10973	11554	14827	28	VTIMPK		PEP_FRAG_1	118	123	b2b3b3∞y1y2y3y6	7	7.1613	7.1613	0.0006	9	11	688.4095	8465.0
27761	688.437	34.96	36.67	106.166				19535	19118	13356	27058	23748	24615	14056	23617	23031	16430	17006	18490	19905	12395	12019	25145	22625	22666	18750	17346	18989	19162	18632	17681	15434	17291	17513	10	SSLLLR		PEP_FRAG_1	22	27	b6y3	2	6.3351	6.567	0.0011	1	3	688.4363	6259.0
27772	688.4358	62.88	64.28	103.545				3510	2876	4700	3137	2694	4884							2002			2902	2981	3049	3113	2783	3107	2816	2646			2245	2982	9	TSLVLR		PEP_FRAG_1	33	38	b3b4b6∞y6	4	5.8766	6.3864	0.0013	1	4	688.4354	8228.0
27782	688.4	50.03	51.56	102.846				3006	3225	3259	2386	2439		2503	3628	3614			2230	2138			3246	3006	2547	2033		2095	2125	1955	1987	3924		3862	6	ALSELR		PEP_FRAG_1	99	104	b2b4y4∞y6	4	6.47	6.47	0.0012	1	4	688.4011	7759.0
27786	689.3472	36.4	38.67	40.0553					1805														2630	2586	2402				1900	1982	2344				20	GAADVEK		PEP_FRAG_1	1637	1643	b5y2	2	5.6734	5.6734	0.0017	1	2	689.3475	2140.0
27789	689.4003	44.89	44.08	101.182																												30342	36033	40943	30	VWGSIK		PEP_FRAG_1	32	37	b2b3b4b4∞b5∞b6y1y2y3y4y4∞y5y6	13	8.9764	9.2331	0.0000	3	29	689.4005	32600.0
27790	689.4013	45.11	44.08	41.233			19465																												3	VWGSIK		PEP_FRAG_1	32	37	b2b4b4∞y2y3y4y5	7	8.2364	9.2331	0.0000	1	29	689.4013	19465.0
27791	689.4013	45.11	43.86	41.19	23126																														1	VWGSIK		PEP_FRAG_1	32	37	b2b3b4b4∞y2y4y4∞y5	8	8.4493	9.2331	0.0000	1	29	689.4013	23126.0
27792	689.401	45.18	44.13	41.025		26413																													2	VWGSIK		PEP_FRAG_1	32	37	b2b3b4b4∞b6y1y2y4y4∞y5	10	8.3916	9.2331	0.0000	1	29	689.401	26413.0
27858	688.4008	59.99	61.38	104.483				13373	10774	11450	11352	11532	11421	11982	12157	12547	8813	9060	11585	9609	11662	11140	13827	11774	14358	13061	12851	10648	12651	12067	11213	2575		2434	19	SALLER		PEP_FRAG_1	578	583	b3∞b6y1y2y6	5	5.109	5.1577	0.0028	3	5	688.4012	12093.0
27859	688.3968	59.48	61.04	102.677											2022		2413	3172	3708	3320						3908	3327	3252							23	ETLGLR		PEP_FRAG_1	1323	1328	b3y6	2	4.7519	6.1708	0.0014	1	8	688.3984	2044.0
27860	688.401	61.89	61.73	104.04																												14640	16847	16971	28	SALLER		PEP_FRAG_1	578	583	b3∞b6y1y6	4	5.1577	5.1577	0.0028	2	5	688.4002	11731.0
27871	690.373	25.52	25.13	37.8575	5005	13317																										7944		8738	2	LTDDVK		PEP_FRAG_1	395	400	y4y5	2	5.8345	5.8345	0.0016	1	2	690.37	3811.0
27878	688.4252	51.08	52.42	104.804	5556		4278	8964	10332	10846	8987	8329	8749	10085	10889	11031		7078	8503	9590	11861	10692	15138	13068	12946	11366	10990	8520	13349	12210	10162			17437	20	DIISLK		PEP_FRAG_2	206	211	b3y3y6	3	7.1133	7.1133	0.0006	2	3	688.4271	12360.0
27881	688.3993	45.07	46.27	101.129	65178	61457	69533	73744	72001	79398	66066	65715	74181	60848	58953	62806	67020	49107	71873	71144	78343	77652	82217	84455	82925	84066	77359	80959	69629	71190	69806	65678	68182	73982	29	SVLQNK		PEP_FRAG_1	185	190	b3b3∞b5b5*y3y3*y4y4*y5y6y6*	11	6.5022	6.5022	0.0011	2	2	688.4016	56136.0
27894	689.4025	46.84	48.54	105.03				4277	3949		3701	3703	3691			2661	7984	5996	6188	7377	6483	5845		4258	3831	7749	7402	6807		6181	5501				16	NLMALK		PEP_FRAG_1	218	223	b2b3b4y3y4y6y6*	7	7.5562	7.5562	0.0000	10	10	689.4034	7841.0
27899	690.3845	33.66	36.13	103.775								1681																							8	TPTPFK		PEP_FRAG_1	555	560	y5∞	1	5.2802	5.2802	0.0021	1	2	690.3845	1681.0
27908	689.3582	35.61	37.28	95.1302	4649			4622	4756	4483	3224	2993	4769	3274	4756	4187		2388	4020	5401	4797		4996	5574	5303	5578	4812	4713	4159	3576	4293		6865	6637	21	EAGTVGR		PEP_FRAG_1	124	130	y5y7	2	5.7768	5.7768	0.0016	2	2	689.3582	4845.0
27918	690.3875	40.13	39.38	39.117																												2631	3465	5682	29	LAVEMK		PEP_FRAG_1	253	258	y2y3∞y4y5	4	7.1253	7.983	0.0000	1	7	690.3872	2207.0
27946	690.3879	37.24	39.03	39.1775								2276	3246					4681					3156	3208				4702		2061	2602				19	LAVEMK		PEP_FRAG_1	253	258	y4y5	2	7.0568	7.983	0.0000	2	7	690.3865	2495.0
27947	690.3879	36.7	39.0	104.155											6972	7424									7351				6635						11	LAVEMK		PEP_FRAG_1	253	258	b2b3b4y2y3y4y5	7	7.983	7.983	0.0000	3	7	690.3875	6920.0
27948	690.3874	37.03	38.77	39.464															3064																15	LAVEMK		PEP_FRAG_1	253	258	y2y3y3∞y4y4∞y5	6	7.4506	7.983	0.0000	1	7	690.3874	3064.0
27970	690.4035	38.96	40.36	102.903		14018	15168	3422	3740				4304		4111	4055		3071								3472	3246			2739	2387				11	TTDLIK		PEP_FRAG_1	941	946	b4∞	1	5.3203	5.4888	0.0023	1	2	690.4042	3431.0
27975	690.407	41.42	40.67	102.876																												1832			28	TTDLIK		PEP_FRAG_1	941	946	b4	1	5.4888	5.4888	0.0023	1	2	690.407	1832.0
27983	689.4002	41.7	43.46	101.644				88679	83460	48789	113809	112158	65895	52986	69116	73007	58825	81602	77156	100343	44128	41408	101464	65680	62287	72578	71981	74073	56977	54390	51282				20	VWGSIK		PEP_FRAG_1	32	37	b2b3b4b4∞b5b5∞b6y2y3y4y4∞y5y6	13	9.2331	9.2331	0.0000	23	29	689.4012	71055.0
27984	685.4627	41.77	43.54	105.856				62868	57647	61631	48792	47992	39166	29073	33332	33334	11388	9119	11903	23220	23513	19244	70355	68940	68889	31083	33083	31904	42745	42725	41395				19	GAIILAK		PEP_FRAG_1	153	159	b3b4b5y1y2y3y4y5y7	9	8.5049	8.5049	0.0000	6	13	685.463	73289.0
27988	690.3837	46.25	45.85	100.896	19469	18609	17706						3341															3017				143530	140249	140701	28	DFPIAK		PEP_FRAG_1	19	24	b2b3b3∞b4b4∞b5y2y3y4y5y6	11	9.416	9.5689	0.0000	6	30	690.3839	121663.0
27994	690.3868	48.24	49.05	103.878	8345	7543	7201												6213					4401	4570	5198				2603					21	LMDALK		PEP_FRAG_1	39	44	b4y6	2	6.1536	6.1536	0.0014	2	2	690.3868	3673.0
28002	690.4241	51.18	52.86	40.5049				4531	5098		4931			2859				2498	4489	7033			4940		4945	7473	7310	7876	6261	6248	5745			6020	27	MLVSLK		PEP_FRAG_1	42	47	b2y2y3y4y5	5	7.7421	8.0071	0.0000	9	13	690.4236	3196.0
28004	690.4238	51.56	52.81	107.185						3000		1748	3244		6748	6075					2964	2891		5182											12	MLVSLK		PEP_FRAG_1	42	47	b2b4b4∞b6y2y3y4y5	8	8.0071	8.0071	0.0000	3	13	690.4253	5431.0
28011	690.3836	43.37	45.09	101.347				169515	157296	208839	158711	156743	176712	87201	99948	92980	169356	129161	193220	187609	189435	185903	180436	176318	171034	148257	162394	162556	164916	162992	160963				27	DFPIAK		PEP_FRAG_1	19	24	b2b3b4b5y1y2y3y4y5y6	10	9.5689	9.5689	0.0000	24	30	690.3838	113893.0
28042	690.3327	30.19	31.73	98.4878	18346	15900	16642	82759	69257	89740	78754	78768	76602				83804	63435		103074	98771		164551	191451	177223	108608	99252	104784	95647	93176	112183	116342	130257	121887	30	DEEGLK		PEP_FRAG_1	926	931	b2b2∞b3b3∞b4b4∞b5b5∞b6y1y2y3y4y4∞y6	15	7.5392	7.5392	0.0001	13	13	690.3328	105356.0
28082	690.3684	31.75	33.98	98.2689				8244	7818	7852	5409	5499	6710					5041		7943	7069	8888	10229	9978	10928	5489	5057	5090	5638	4640	5733				4	DDSLLK		PEP_FRAG_1	186	191	b4y2y6	3	6.349	6.349	0.0013	3	5	690.3698	5936.0
28087	691.3456	29.23	31.5	99.6757				1919		3718			3793		1773	1968				3662			5783	5952	6169	3205	2091	2660	2582	2321	2995				16	IEMGNK		PEP_FRAG_1	691	696	y4y5y5*	3	5.8705	5.8705	0.0016	2	3	691.3463	3732.0
28104	689.3961	53.52	54.79	100.405				18611		20387	20279	20591	23545	8808	9991	10093	10569	15372	23030	21609	30240	29934	17737	15806	15182	19105		19642		17167		12120	13542	12217	18	GSGIVTR		PEP_FRAG_1	60	66	b3b5b7y1y3y4	6	6.3926	6.3926	0.0013	1	2	689.3952	61088.0
28122	691.3634	30.37	32.08	97.3894	82703	86118	93328	132790	124351	135526	85493	90188	74311	124138	118152	116246	110965	83948	127005	152042	160503	152764	156437	174082	157114	136458	136487	141681	131341	126329	146757	165063	159719	151029	5	SSLADAK		PEP_FRAG_1	496	502	b2b3b3∞b6b6∞b7y1y4y4∞y5y6y7	12	7.4321	7.4321	0.0003	4	5	691.3646	104520.0
28123	691.3637	34.84	36.31	97.1051	128392	129126	154894	91639	92876	96459	84053	80269	93899	38865	42222	40410	79332	60472	84588	118496	126873	98118	129531	134499	136118	131745	138611	139854	97711	93714	100958	119351	116607	115615	7	SSLADAK		PEP_FRAG_1	496	502	b3b3∞b6y1y4y4∞y5y6y7	9	6.974	7.4321	0.0003	1	5	691.3644	61568.0
28143	691.3472	53.72	54.87	101.754						2378					1546							1697		2776	2959								1699		20	QGDLMK		PEP_FRAG_1	100	105	b4y6	2	4.8956	4.918	0.0029	1	2	691.3476	2098.0
28163	691.3649	50.45	52.3	100.153				1930								1422			1445				2161		3785	3871	3506	3705	1950	2941	1830				22	SNITSLG		PEP_FRAG_1	566	572	y4	1	5.7217	5.8921	0.0015	2	11	691.364	2428.0
28181	690.3866	62.36	63.82	101.583				4368	4146	3878	5895	5550	4707					3400	4649	2615	2419		2723	3203	2811	8977	9047	7098		2100					24	LAMDLK		PEP_FRAG_1	900	905	b3b6∞y3y6	4	5.2365	5.2365	0.0022	3	4	690.3864	4929.0
28188	691.3433	47.66	48.89	100.473	16447		16776	39578	36513	38586	32555	30180	38229	31616	29310	30869	29831	22131	33799	44168	48745	49137	59838	62949	55699	45632	45181	42744	53234	50517	50498	31353	37076	35598	21	NGEMIK		PEP_FRAG_1	294	299	b3b5b5*b5∞b6b6*y6	7	6.1857	6.1857	0.0013	6	7	691.3435	55653.0
28191	691.4154	50.37	49.9	101.996																												8161	10212	11595	30	AFNLVK		PEP_FRAG_1	287	292	b2y2y3y4	4	6.8447	7.4665	0.0001	2	17	691.4144	8573.0
28192	691.4129	50.57	50.1	103.165																												8173	8517	10372	29	ANLVFK		PEP_FRAG_2	433	438	b3b4y3	3	6.1561	6.1815	0.0013	2	16	691.4122	6181.0
28215	692.3384	22.04	22.53	37.137																														1671	30	GPFSER		PEP_FRAG_1	386	391	y3	1	5.7291	5.8274	0.0016	1	2	692.3384	1671.0
28219	692.4223	27.06	26.0	42.195			6961																												3	GIHPIR		PEP_FRAG_1	127	132	y3y4	2	7.4052	7.4052	0.0003	1	3	692.4223	6961.0
28221	691.336	66.48	68.1	99.4588				3256	2568		3067	2492	2729	2644	3482	3762	4302	3945		3668		3942	3558	2294	2471	5917	5441	5105	4372	4334					18	EMEGLL		PEP_FRAG_1	636	641	b2b2∞b3∞b4b4∞y4∞	6	5.6366	5.7307	0.0017	7	11	691.3337	6351.0
28222	692.4245	27.05	26.31	42.101	7437																														1	GIHPIR		PEP_FRAG_1	127	132	y3	1	6.7692	7.4052	0.0003	1	3	692.4245	7437.0
28223	691.336	67.38	67.79	100.036															3970																15	EMEGLL		PEP_FRAG_1	636	641	b2b2∞b4∞	3	4.2808	5.7307	0.0017	1	11	691.336	3970.0
28225	691.3369	67.31	67.8	100.117																	5842														17	EMEGLL		PEP_FRAG_1	636	641	b2b4b4∞b5	4	5.7307	5.7307	0.0017	1	11	691.3369	5842.0
28226	692.4228	27.15	26.32	42.048		7051																													2	GIHPIR		PEP_FRAG_1	127	132	y3y4	2	7.3783	7.4052	0.0003	1	3	692.4228	7051.0
28234	692.3384	30.84	30.17	39.999		1764																													2	DPASFR		PEP_FRAG_1	35	40	y5	1	6.985	7.1723	0.0006	1	6	692.3384	1764.0
28237	692.3386	30.76	30.15	39.935			1301																												3	DPASFR		PEP_FRAG_1	35	40	y4y5	2	6.9043	7.1723	0.0006	1	6	692.3386	1301.0
28239	692.34	30.69	30.11	97.86	1881																														1	DPASFR		PEP_FRAG_1	35	40	b6y5	2	7.0863	7.1723	0.0006	1	6	692.34	1881.0
28256	691.3432	26.09	27.97	96.9854	15199	13591	15866	22207	21777	26841	13973	14057	6848	21750	23825	27800		10251	7334	18371	11442	13815	50971	51473	46370	19573	19078	17953	37412	36870	35495	47312	43626	44798	4	IEMGNK		PEP_FRAG_1	691	696	y5	1	4.9919	5.8705	0.0016	1	3	691.3437	16558.0
28291	692.4	48.33	47.67	39.515																												1979	2590	3433	28	TPSFLK		PEP_FRAG_1	724	729	y5	1	5.7465	6.3182	0.0013	2	17	692.3979	1319.0
28295	692.4096	35.06	37.15	104.226							2290	2010	3533		3762	3547				1752	1646	1300	1987	1961	1821	2334									9	LLYAGR		PEP_FRAG_1	260	265	y3y4y6	3	6.058	6.058	0.0016	2	3	692.4075	2599.0
28314	692.367	29.69	28.74	38.5526	13960	13976																										13754	12612	11976	30	MEIATK		PEP_FRAG_1	58	63	b2y3y4y5∞	4	8.2853	8.2853	0.0000	5	5	692.3668	9656.0
28315	692.41	46.09	47.8	105.895				4155	4209	3229	2654	2854		3535	3335									2300	3767										4	FAVLSR		PEP_FRAG_1	11	16	y3y5	2	7.3863	7.3863	0.0003	2	2	692.4111	2685.0
28324	692.3754	35.78	37.9	39.652					5594																	2315		2862							22	IAADFR		PEP_FRAG_1	729	734	b4y4y5	3	6.9539	7.1226	0.0006	1	5	692.3753	1557.0
28325	692.3745	36.02	37.93	102.631						2893	6601	6108	6022		6412	6042		5927	6864		6631			4412	3544		4539		5159	4620	2732				25	IAADFR		PEP_FRAG_1	729	734	y2y3y5	3	7.1226	7.1226	0.0006	2	5	692.3759	3177.0
28330	692.401	45.1	46.98	39.6672				4919	3356		4228	4007						5568	5095	4092	3723	3654	4147	3789	4007	3591	3729	4241	3605	3425	3004				16	TPSFLK		PEP_FRAG_1	724	729	y2y5	2	6.3182	6.3182	0.0013	13	17	692.4021	3742.0
28333	692.3636	40.41	41.98	101.161	9506			10670	10789	11172	8399	9130	9785				8802	7920	13472	12387	15000	12824	12520	13125	11560	11113	9878	10018	10129	8931	8718			6752	20	SPTPYK		PEP_FRAG_1	88	93	b3y3y6	3	6.5823	6.5823	0.0011	4	4	692.3642	13301.0
28411	692.4363	47.14	46.41	106.245																												17156	17608	25201	28	YIGIVK		PEP_FRAG_1	219	224	b2b3b4y2y4y5y6	7	7.9791	8.3936	0.0000	3	25	692.4361	13547.0
28414	692.4359	53.65	53.22	106.636																												5784	6522	6821	28	GVYLLK		PEP_FRAG_1	502	507	b3b4y6	3	5.5456	6.6637	0.0011	1	6	692.4357	4076.0
28415	692.4325	64.71	64.71	106.431						1237																									6	FIATLK		PEP_FRAG_1	118	123	y3y4y6	3	6.9476	6.9476	0.0008	1	4	692.4325	1237.0
28428	692.4353	53.02	53.74	108.122						2212									1977		2022														6	FITALK		PEP_FRAG_1	159	164	b6y4∞y6	3	5.9694	5.9694	0.0016	1	5	692.4364	3251.0
28442	693.3946	32.7	34.65	38.028					1657	2569					1277								1502												19	FAGASIK		PEP_FRAG_1	434	440	y5	1	5.8779	5.8936	0.0015	2	7	693.3941	1192.0
28447	693.3214	32.19	34.66	93.8643				1658								1532				1810				2103	1699			1487							24	AGTFGPGS		PEP_FRAG_1	212	219	b5	1	5.4979	5.4979	0.0020	2	3	693.323	1038.0
28457	692.4359	47.79	49.66	39.1614				1935	1642									2866	3126				1574	1502	1703	1800		2078	1680						5	FIATLK		PEP_FRAG_1	118	123	y2y4	2	6.8286	6.9476	0.0008	1	4	692.4337	1043.0
28482	693.3938	48.4	49.66	105.671															1428																15	FAGASIK		PEP_FRAG_1	434	440	y5y7	2	5.2478	5.8936	0.0015	1	7	693.3938	1428.0
28484	693.3597	49.22	51.41	103.087																1177															16	NFGVEK		PEP_FRAG_1	168	173	b4*y6	2	5.1165	5.5183	0.0020	1	2	693.3597	1177.0
28534	693.396	42.08	44.03	42.115							4660			3254												2510	4454	4977	4196	4311	3951				23	ALQAYK		PEP_FRAG_1	100	105	y4	1	5.8285	5.8285	0.0016	1	2	693.3971	2873.0
28547	693.3947	56.56	58.35	37.8624				2129				1976								2239	2034		1750	1679	1519	2058	1739	1754							20	FAGASIK		PEP_FRAG_1	434	440	y5	1	5.0888	5.8936	0.0015	1	7	693.3932	1245.0
28553	694.3542	27.72	27.05	99.3167																												2566	2185	2411	29	AAFNSGK		PEP_FRAG_1	21	27	b7y5y7y7*	4	7.6433	7.6433	0.0000	1	2	694.3525	1500.0
28560	694.3418	27.51	26.6	98.222	5655	5746	6143																												2	GEDFVK		PEP_FRAG_1	330	335	b3b4y6	3	6.8077	7.5513	0.0000	2	7	694.3412	1512.0
28562	694.3432	27.09	26.22	98.031																												2842			28	GEDFVK		PEP_FRAG_1	330	335	b3b4b6y6	4	7.5513	7.5513	0.0000	1	7	694.3432	2842.0
28563	694.3424	27.18	26.35	97.893																													1899		29	GEDFVK		PEP_FRAG_1	330	335	b4y6	2	7.0942	7.5513	0.0000	1	7	694.3424	1899.0
28564	694.3912	33.45	32.66	39.414																												7926	8181	7681	29	LGYVSR		PEP_FRAG_1	449	454	b4y2y3y4y5	5	7.4267	7.4267	0.0003	3	15	694.39	5908.0
28579	692.4363	44.29	45.99	106.898				32051	21898	20053	24518	23175	23290	27899	35513	36845	57857	56991	44312	47249	27091	22822	31961	32142	29790	33972	26824	38738	32084	32221	34588				12	YIGIVK		PEP_FRAG_1	219	224	b2b3b5y1y2y3y4y5	8	8.3936	8.3936	0.0000	22	25	692.4376	40497.0
28591	694.3296	36.32	38.84	102.069																1477															16	FDPMGK		PEP_FRAG_1	232	237	y4	1	5.194	5.6241	0.0019	1	4	694.3296	1477.0
28601	692.4357	51.1	52.7	107.314				5703	5611	5025	4229	4228	4580	3407	4233	3738	6127	5788	5734	5772	5936	5869	6266	6429	6598	6084	6030	6042	5544	4721	4773				18	GVYLLK		PEP_FRAG_1	502	507	b4y1y3y4y6	5	6.6637	6.6637	0.0011	5	6	692.4353	10113.0
28614	694.3235	36.64	38.87	101.615												1169																			12	FDPMGK		PEP_FRAG_1	232	237	y4	1	5.6241	5.6241	0.0019	1	4	694.3235	1169.0
28618	694.356	44.28	46.08	102.087																		2650				2743	2718	2837							18	GSVEFR		PEP_FRAG_1	129	134	y3y6	2	5.9735	5.9735	0.0016	1	4	694.3527	2914.0
28633	692.4379	49.69	51.64	41.736																							1083								23	FITALK		PEP_FRAG_1	159	164	b3	1	5.1631	5.9694	0.0016	1	5	692.4379	1083.0
28642	694.3892	29.96	32.05	101.32							8392		5933		8732	9228		3641																	7	LGYVSR		PEP_FRAG_1	449	454	y4y5	2	6.7801	7.4267	0.0003	1	15	694.3917	5033.0
28648	694.3289	35.52	37.48	96.4871						4045	7730	8091	9588		1894	3288	2637	2864	4571	2879	2309			2309	3463	22175	18635	21549	11055	9449	10443				25	GGNFSGR		PEP_FRAG_1	219	225	y3y4y5y7*	4	8.0007	8.0007	0.0000	13	16	694.3292	7293.0
28650	693.3591	39.75	41.08	102.387	19974	17393	17698	14650	12406	13931	8890	8262	11381	10567	12718	13232	21347	17972	27665	19694	19002	18224	20768	18092	18094	16089	17020	19288	12640	11490	11232	8069	8918	9620	9	AAQEFK		PEP_FRAG_1	662	667	b3b4b4*y2y3y3∞y6y6*	8	5.8173	5.8173	0.0016	2	2	693.3572	15129.0
28659	694.3968	55.04	54.82	37.896																														1226	30	FLVGMK		PEP_FRAG_1	487	492	y3y4y5	3	6.2936	6.5459	0.0011	1	10	694.3968	1226.0
28683	694.3977	59.21	58.94	104.85																												6023	6338	6967	30	GMVFLK		PEP_FRAG_1	671	676	b2b3b4y3y6	5	6.9895	7.7816	0.0000	3	21	694.3991	4735.0
28688	694.3889	31.19	33.42	38.956																		5777													18	LGYVSR		PEP_FRAG_1	449	454	y4y5	2	7.2076	7.4267	0.0003	1	15	694.3889	5777.0
28692	694.3793	39.66	41.49	102.131				8611	8134	6345	6487	6659	5069	7033	7445	7859	18921	16866	21288	12483	11536	12641	13856	13511	12629	14346	14230	13996	9449	9968	9220				15	GIFETK		PEP_FRAG_1	780	785	b2b3b5y2y3y3∞y4	7	7.7542	7.7542	0.0000	20	23	694.3781	21329.0
28712	694.395	52.57	54.1	38.0252						2389			1562		2365	3369		3234	2469	2731	2412	2132	1708	2177	1804	2960	2930	2873	1881						9	FLVGMK		PEP_FRAG_1	487	492	b2b5y3y4y5	5	6.5459	6.5459	0.0011	9	10	694.3971	1631.0
28717	694.4147	30.18	32.76	106.526											2596	2853			2051	2834	1735	1639	1461												16	IIASYK		PEP_FRAG_1	543	548	b2y2y4	3	6.0124	6.0124	0.0015	2	2	694.4153	2680.0
28721	694.4215	41.34	42.39	104.207						1416									1538			1181													18	SLHLPK		PEP_FRAG_1	158	163	b4	1	5.3403	5.4666	0.0020	1	3	694.423	1246.0
28724	694.4142	46.29	45.59	109.145																												5345	5185	6275	29	YASLLK		PEP_FRAG_1	1359	1364	b3b3∞b4∞y2y4y6	6	6.5087	7.21	0.0005	1	5	694.4142	3418.0
28731	694.366	31.9	34.3	40.7962					4210																	1817		2388			2384				5	MFAPTK		PEP_FRAG_1	101	106	b6∞y3	2	6.154	6.9677	0.0007	2	9	694.3637	2673.0
28732	694.3621	31.64	34.2	105.171							4561				4344	4999																			11	MFAPTK		PEP_FRAG_1	101	106	y1y3y4	3	6.9017	6.9677	0.0007	2	9	694.3617	3854.0
28736	694.3603	34.55	34.55	104.507						5496																									6	MFAPTK		PEP_FRAG_1	101	106	y3y3∞y4y6	4	6.9677	6.9677	0.0007	1	9	694.3603	5496.0
28743	694.3543	41.5	42.69	103.594	8221	6858	6471		5564	6772	4001	4191	4791	6434		6115	9868	9277	12185	7802	8339	7802	8405	7443	7696	9465	9323	8337	8561	7106	7372	5942	5371	6252	17	GIFDSR		PEP_FRAG_1	650	655	b6y4y6	3	6.8228	6.8228	0.0011	1	4	694.3532	14212.0
28745	694.3986	56.79	58.41	105.051				11931	12016	10877	7517	7630	6663	6498	8042	9140				8282			9859	10995	11475	7302		6379	5377	5009	4996				6	GMVFLK		PEP_FRAG_1	671	676	b2b3b4y3	4	7.7816	7.7816	0.0000	18	21	694.3977	31628.0
28749	694.4407	38.46	37.07	42.557	3268																														1	VHLLGR		PEP_FRAG_1	33	38	b2y3y4	3	6.8181	6.8618	0.0011	1	2	694.4407	3268.0
28750	694.4365	38.49	37.51	41.978		4005																													2	HVGLLR		PEP_FRAG_1	283	288	b2y4	2	5.9741	6.6514	0.0011	1	7	694.4365	4005.0
28751	694.4387	38.43	37.5	42.264			3495																												3	HVGLLR		PEP_FRAG_1	283	288	b2y4	2	5.6703	6.6514	0.0011	1	7	694.4387	3495.0
28763	694.4603	65.67	66.22	105.636									1305						1633		1083	1045													18	LPPIVR		PEP_FRAG_1	111	116	y1y4	2	4.3919	5.7185	0.0017	1	5	694.459	1261.0
28781	694.4611	45.36	47.24	40.0384				1601											2080	1908				1509	1300	1920		2286							21	LPPIVR		PEP_FRAG_1	111	116	y4	1	5.3299	5.7185	0.0017	1	5	694.4624	1006.0
28786	694.3552	59.01	60.4	102.431				5453	5070	3595			3632		4701	4532	3773	5509	4300	4871		3817	5099	4766	4925	3276	5029	3077	4058	4243	2792	4961		6203	27	GIFDSR		PEP_FRAG_1	650	655	b4∞b6y1y6	4	4.9107	6.8228	0.0011	2	4	694.3554	1489.0
28820	694.4147	64.11	65.5	105.455											2187	2449							3207	3315	3382				2396	2585	3055	4301	4710	4912	29	IISSFK		PEP_FRAG_1	712	717	y4y5y6	3	7.413	8.4001	0.0000	5	22	694.4154	3082.0
28833	694.4258	35.54	37.36	39.9866				2203	2503			1866			2675	2266			1711	2636	2602		2257	2114	2251	2163	2164		2006	2120	1888	2761	2522	2658	4	SLHLPK		PEP_FRAG_1	158	163	b4	1	5.4666	5.4666	0.0020	2	3	694.4259	1442.0
28869	696.3586	27.09	26.17	98.9302		26847	24659																									47319	45507	50723	30	SIYGEK		PEP_FRAG_1	77	82	b3b4y1y2y2∞y3y4y4∞y5	9	9.2342	9.2342	0.0000	5	7	696.3587	46026.0
28883	696.3228	27.91	30.5	98.4652																1580	1897	1880			1271		2424	2965							24	FTDADK		PEP_FRAG_1	647	652	y3y6	2	5.4224	5.7664	0.0016	1	2	696.3216	2039.0
28887	696.3555	35.34	34.48	98.52																												4650	5055	5688	28	SEFSVK		PEP_FRAG_1	176	181	b3b4∞b5∞b6y4	5	6.4561	6.4561	0.0012	2	4	696.3566	3170.0
28891	696.3673	33.29	35.08	102.059									2538										1321	2159	1402										19	SLSSFR		PEP_FRAG_1	891	896	b4y6	2	4.6065	5.1858	0.0028	1	2	696.3668	1048.0
28899	694.4158	36.89	38.83	105.952				28473	27599	15030	31143	31581	19630	19505	26455	26739	20773	26880	22959	30156	26401	16768	24696	23263	25525	29284	30143	29146	26943	26501	24169				27	YIASLK		PEP_FRAG_1	110	115	b2b3b4b4∞y1y2y3y4y5	9	8.7211	8.7211	0.0000	24	29	694.4156	15064.0
28909	696.3568	42.99	42.23	99.3323																												7545	7636	7110	28	SLFSDK		PEP_FRAG_1	344	349	y2y3y4	3	7.2663	7.3731	0.0004	3	23	696.3578	5501.0
28916	696.323	41.66	42.97	103.047							6911	6969	7669				2709																		7	FTDADK		PEP_FRAG_1	647	652	y3y4y6	3	5.7664	5.7664	0.0016	1	2	696.3238	4078.0
28917	694.4165	40.36	39.45	105.953	19798	19310	16585																												3	YIASLK		PEP_FRAG_1	110	115	y3y4	2	7.4635	8.7211	0.0000	3	29	694.4167	4062.0
28921	694.4151	41.0	40.02	36.983																													4209		29	LSALYK		PEP_FRAG_1	263	268	b3∞	1	5.4038	5.797	0.0016	1	6	694.4151	4209.0
28924	696.3571	30.4	32.33	100.783				2331	2520	3207	1943	2080					2609			3257	3398		3020	3789	3743			2923	2026				3056	2940	24	SIYGEK		PEP_FRAG_1	77	82	y3y6	2	6.9598	9.2342	0.0000	1	7	696.3575	2028.0
28934	694.3432	49.85	51.82	101.567											1020																				11	DLFGDK		PEP_FRAG_1	226	231	b2y1y3y6	4	5.5227	5.5227	0.0020	1	10	694.3432	1020.0
28978	696.3811	55.92	56.53	102.915						2391			2347				2372		5490		2329														9	GFGFIR		PEP_FRAG_1	110	115	b2b3b4y6	4	6.2317	7.725	0.0000	1	15	696.3823	2504.0
28981	696.3854	58.6	58.11	105.16	10729	10010	9717																									16706	17185	20684	30	GFAFVR		PEP_FRAG_1	56	61	b2b3y6	3	7.4337	8.831	0.0000	4	24	696.3848	15654.0
28985	696.385	63.71	63.79	102.678																														4163	30	GFGFIR		PEP_FRAG_1	110	115	b3y6	2	6.3579	7.725	0.0000	1	15	696.385	4163.0
28994	696.3745	37.8	39.94	40.9456				5437	4825		4605	4478			3792	3790		3619	2343	5374			6160	5202		5923	5984	5284	5495	5423	4915				12	SLSSFR		PEP_FRAG_1	891	896	y4∞	1	5.1858	5.1858	0.0028	1	2	696.3733	3032.0
29009	696.4792	54.52	53.78	41.8367	10472	10777	8912																												3	VPLLVR		PEP_FRAG_1	350	355	y3y4y5	3	6.362	6.6045	0.0011	3	20	696.4785	2144.0
29015	694.3554	53.54	54.9	102.545				28903	29421	20733	13302	14252	28142	12781	12783	18979	10186	8677	13004	21021	17321	15589	31657	32202	30357	21675	20200	19615	15047	23975	24737	24550	26310	25724	20	GSVEFR		PEP_FRAG_1	129	134	y3	1	5.5311	5.9735	0.0016	1	4	694.3549	7376.0
29020	696.3568	39.6	41.52	99.9013				6965	6949	6222	6339	6714		6509	7061	7446	8090	7204	8012	6663	7144	6886	9566	10398	9801	7889	7415	7418	7363	7205	7254				6	SLFSDK		PEP_FRAG_1	344	349	b2b3b5∞y1y3y4y5∞y6	8	7.3731	7.3731	0.0004	19	23	696.3564	17342.0
29027	696.354	38.43	40.03	102.65													18877																		13	SADLYK		PEP_FRAG_1	134	139	b2y4y6	3	6.4084	7.5206	0.0001	1	7	696.354	18877.0
29038	696.4412	44.81	46.42	37.5417				10830	9985		9739	9778			6307	6330			3447	6574	4029	4141	13812	12207	12260		9520	7265	7856		9661	14918		13752	20	VHSILK		PEP_FRAG_1	15	20	b4b5y6	3	6.5425	6.5425	0.0011	4	4	696.4431	12030.0
29039	695.3386	42.09	43.4	101.845	26740		24433	23324	19188	23900	17891	17315	15832	22926	23852	23427	17881	17063	23451	26622	26698	23663	23000	21928	22731	23972	24686	21698	28441	24866	25327	16961	18386	20454	10	GQESFK		PEP_FRAG_1	224	229	b4y6y6*	3	5.9059	7.5977	0.0000	1	2	695.3389	11632.0
29043	697.3299	55.35	56.62	99.628																		1360													18	TAAQVK	Phosphoryl STY(1)	PTM	97	102	y5	1	4.9328	5.3371	0.0021	1	5	697.3299	1360.0
29051	696.4792	51.31	53.12	41.3321				3452	3151		3112	2963			2228	2257		5019	4379	3795						3950	3248	3215	2673	3231	3153				5	VPLLVR		PEP_FRAG_1	350	355	b2y3y4y5	4	6.6045	6.6045	0.0011	14	20	696.4786	2000.0
29058	697.402	31.07	30.23	36.8023																												49540	48260	50995	30	APKPER		PEP_FRAG_1	994	999	b2b6y1y2y4y4∞y5y6	8	6.2735	6.2735	0.0013	3	3	697.4009	43430.0
29071	697.3355	35.18	37.25	98.3954				1581	1793	2520						2064			1534	2534	3004	2300	1900	2095	2125										16	TAAQVK	Phosphoryl STY(1)	PTM	97	102	b6y2y3*y6	4	4.958	5.3371	0.0021	2	5	697.3376	2343.0
29081	695.3376	47.25	48.91	98.5287				5483	4008	4394	3942	3174	4429		2503	2505	3345	2606	4021	4820	5402	5365	5173	5227	6071	4871	5149	4945	3815	4332	3268				19	GQESFK		PEP_FRAG_1	224	229	b2y4y6	3	7.5977	7.5977	0.0000	1	2	695.3383	4279.0
29085	697.3696	38.05	40.07	38.114				3739	3616	2917	4507	3134			4375	4060		2736	2307	3780	3308	3046	2955	3411	2508	3529	3749	3847	2992	2834	2899				6	FGAQFK		PEP_FRAG_1	548	553	b2y4y5	3	6.8995	6.8995	0.0009	19	23	697.3682	6073.0
29088	697.3704	41.6	40.82	38.043																												2957	3066	2201	30	FGAQFK		PEP_FRAG_1	548	553	y5	1	5.5069	6.8995	0.0009	1	23	697.3695	1402.0
29091	697.3685	38.31	40.06	102.806										3238																					10	FGAQFK		PEP_FRAG_1	548	553	y5	1	6.0591	6.8995	0.0009	1	23	697.3685	3238.0
29113	697.3703	41.44	43.2	39.3771				5937	5585	3814	2904	6547	3060			1296		2424	4201	4724	3196	3459	2579	2225	4198	5076	2918	5795	3908	3382					9	FGAQFK		PEP_FRAG_1	548	553	b4*y3*	2	4.95	6.8995	0.0009	1	23	697.3695	2677.0
29118	696.3593	52.86	54.29	104.023				4707	4971	5481	4244	3993	5804	3182	3641	4208	4166	3145	5067	5177	6651	6626	5913	5860	5257	5943	5710	5038	5309	5708	5706		3141	3172	4	TSVDFK		PEP_FRAG_1	510	515	y5y6	2	4.5669	4.5837	0.0031	1	2	696.3603	3043.0
29120	697.4363	36.55	35.71	101.722																												6366	7613	7628	30	NPVLVR		PEP_FRAG_1	47	52	b3b4y6y6*	4	6.5425	6.5425	0.0011	2	3	697.4365	5378.0
29126	697.2996	29.8	32.28	97.5616				2825	3728		5402	5556	4403		8195	8546	4972	2739	1549	5090	2074		2487	2760	2828		5061		2596	3810	3521				20	GSGMMSK		PEP_FRAG_1	54	60	b7y2y6y7	4	5.4207	5.4207	0.0024	1	4	697.3017	2275.0
29128	697.4266	45.86	47.27	104.208				7214	5907	5487	4683	4604	5734	3776	4938	5069				2869	3109		7705	7476	7381	2934	3448	3284	4522	4767	4716	7060	7447	7765	6	SVPVAPK		PEP_FRAG_1	2	8	b5∞y2y3y5y7	5	7.1301	7.1301	0.0006	2	2	697.4259	15335.0
29135	697.4376	47.32	49.1	39.1522				5091	4978	3484	3455	3505		3937	5245	5279		5012		5831	3691	3539	5286	5356	5250	5583	6106	5364	6902	5172	4549				20	LPVNVR		PEP_FRAG_1	166	171	y4	1	5.0726	6.3661	0.0013	4	7	697.4383	4645.0
29140	696.3847	61.33	62.82	103.033				5676	5284	5139	5847	6467	6351	4627	6024	6017	22671	21621	22581	11102	11337	11034	7203	7673	7923	10426	10290	9146	5013	6628	6368				14	GFGFIR		PEP_FRAG_1	110	115	b3y4	2	7.725	7.725	0.0000	10	15	696.3854	12045.0
29145	697.4626	49.94	49.96	109.664	5781	6340	5894								2524	2144																10896	11620	12459	28	GIVPLAK		PEP_FRAG_1	76	82	b2b3b4y2y3y4y7	7	8.6437	9.0467	0.0000	6	29	697.4629	8432.0
29154	697.4999	30.78	30.21	38.814	5106																														1	LKPVIK		PEP_FRAG_1	510	515	y4y5	2	7.0652	7.0652	0.0006	1	3	697.4999	5106.0
29156	697.5012	30.68	29.94	38.478			3446																												3	LKPVIK		PEP_FRAG_1	510	515	y2y4	2	6.2679	7.0652	0.0006	1	3	697.5012	3446.0
29158	697.4997	30.79	30.13	38.558		3855																													2	LKPVIK		PEP_FRAG_1	510	515	y2y4	2	6.8648	7.0652	0.0006	1	3	697.4997	3855.0
29178	697.4621	43.86	43.93	109.95									3459			4511	2414															4125	3674	4770	9	IQLVPK		PEP_FRAG_1	1064	1069	b3b4y2y6	4	5.5674	5.5674	0.0023	1	13	697.4609	3160.0
29185	697.4626	47.6	49.26	110.01				15890	15628	13231	20720	19319	20168	8586	10625	10881	28937	23523	19141	18797	16780	14017	19114	20476	18206	17975	18994	18154	21511	21424	21413				19	GIVPLAK		PEP_FRAG_1	76	82	b2b3b4y2y3y4y5y7	8	9.0467	9.0467	0.0000	23	29	697.4635	18179.0
29196	698.404	25.73	25.25	40.191																														17329	30	LLMHGK		PEP_FRAG_1	18	23	y2y3y4y5	4	7.9344	7.9344	0.0000	1	2	698.404	17329.0
29201	698.4005	28.17	30.77	40.114																											1502				27	LHAVMK		PEP_FRAG_1	46	51	b3	1	5.1058	5.6994	0.0016	1	2	698.4005	1502.0
29205	698.3996	33.19	32.26	40.631	1048																														1	QPGQLR		PEP_FRAG_1	102	107	y5	1	6.0177	6.0177	0.0015	1	2	698.3996	1048.0
29207	697.3004	51.94	53.5	99.7221				1826		2761			3100		2865	2650	1876			2962		2837	3247	3499			1927		3317	2912					18	GSGMMSK		PEP_FRAG_1	54	60	b4y2y7	3	4.7272	5.4207	0.0024	1	4	697.3002	3666.0
29247	698.4386	47.66	48.97	105.89													2627																		13	ELLPVK		PEP_FRAG_1	386	391	b6y3y6	3	6.2818	6.6645	0.0011	1	8	698.4386	2627.0
29254	698.4442	50.73	51.69	38.8353						2629			1834						3211	1342	3329	2839													18	ELLPVK		PEP_FRAG_1	386	391	y3y4	2	6.6645	6.6645	0.0011	3	8	698.4449	3588.0
29260	698.4443	62.3	62.31	108.745									1109																						9	ELLPVK		PEP_FRAG_1	386	391	y3y6	2	5.9832	6.6645	0.0011	1	8	698.4443	1109.0
29286	698.5197	64.39	64.28	110.833																												9538	11594	12813	29	IILLVK		PEP_FRAG_1	71	76	b2b3b4y2y3y4y6	7	7.8404	8.1347	0.0000	2	25	698.5199	8804.0
29294	698.3843	31.3	33.88	99.0612							1767	1845						2977		4004			3713	3745	3447	5388	5159	5921							24	LPPDTR		PEP_FRAG_1	211	216	y3y4y6	3	5.5435	5.5435	0.0020	2	2	698.3838	4530.0
29349	699.3832	39.83	40.87	38.063							2621		2381								2425		4061	3374		2769		2821			2625	4624	4101	5118	30	EPIANR		PEP_FRAG_1	379	384	y3*	1	4.7022	4.804	0.0030	1	2	699.3801	3329.0
29379	698.3616	32.18	32.7	37.2026	35413	42371	39123							33059												34660	33123				39658	36750	39619	39181	30	SEVAHR		PEP_FRAG_1	29	34	b4b5y1y3y5	5	6.6634	7.5685	0.0000	5	18	698.3609	31609.0
29381	698.3602	30.21	32.52	99.1185				39443	37528	51595	36295	34302	53061		40505	39523	17769	22655	39427	52778	58550	69613	45603	46262	54690			34293	37391	38223					18	SEVAHR		PEP_FRAG_1	29	34	b3b4b4∞b6y1y2y3y5y6	9	7.5685	7.5685	0.0000	13	18	698.3582	110036.0
29383	699.4147	26.65	25.92	40.235	15145	17026																											4024	3153	1	IPVNTR		PEP_FRAG_1	337	342	y3y4y5	3	6.9667	7.2961	0.0005	2	3	699.4136	4202.0
29385	699.4152	26.66	25.65	40.363			4918																												3	IPVNTR		PEP_FRAG_1	337	342	y2y3y3*y4y5	5	7.2961	7.2961	0.0005	1	3	699.4152	4918.0
29423	698.5199	62.21	63.92	41.8203				33962	32625		33213	32447		6766				25656								30475	32485	30069	24897	27365	24696				4	IILLVK		PEP_FRAG_1	71	76	b2b3b4y2y3y4y5	7	8.1347	8.1347	0.0000	12	25	698.5191	27089.0
29424	698.519	62.56	63.83	111.444						7276			8968		4822	4633	10982		9042	10436	10457	10471	10947	10450	9497										17	IILLVK		PEP_FRAG_1	71	76	b2b3b4y2y3y4y5y6	8	8.0846	8.1347	0.0000	10	25	698.5185	19964.0
29425	699.4419	38.55	37.69	111.432																												2667	2638	2604	30	GLVVSPK		PEP_FRAG_1	128	134	b3y2y3y7	4	6.4607	6.9477	0.0008	2	14	699.442	1660.0
29427	699.4054	37.19	39.41	98.7565				2488	2476		2648	2024								4426	1867		10013	10763	11275				10297	8538	14198				25	DVLPQK		PEP_FRAG_1	315	320	y3	1	5.9528	5.9528	0.0015	1	4	699.4061	6857.0
29430	699.4437	45.9	44.94	40.8223	6049	5711	6072																												3	ISPAALK		PEP_FRAG_1	277	283	b2b5∞y1	3	3.8188	5.7075	0.0017	1	7	699.4444	1399.0
29441	699.4543	44.75	46.82	40.091				2903	2184														2509	1518	2587										4	AIQVLR		PEP_FRAG_1	775	780	y4	1	5.8069	6.1023	0.0015	1	4	699.4535	1882.0
29442	699.4505	47.09	46.81	105.464									1487																						9	LALVQR		PEP_FRAG_1	107	112	b2b3y6	3	5.7982	6.864	0.0011	1	2	699.4505	1487.0
29448	699.4056	31.74	33.05	104.69	5159			8575		9613	15239	15648	17022	3825							9770		10630	9756			10810	11549		6595		7398	7059	7841	9	SAPSIPK		PEP_FRAG_1	143	149	b4b4∞b5b5∞y2y3y5y7	8	7.9317	7.9317	0.0000	10	10	699.4049	16602.0
29467	699.4522	43.71	44.65	106.54						6752			6735	6195		7237					9823	9948		7160					6348	5820	6031	7413	7435	7868	12	AALGVLR		PEP_FRAG_1	210	216	b5y4y7	3	5.8186	5.8186	0.0016	1	2	699.4529	6825.0
29476	700.3024	50.85	50.7	103.07									1214																						9	GKSGSGK	Phosphoryl STY(3)	PTM	5	11	b4b5-H3PO4y7	3	5.825	5.825	0.0016	1	2	700.3024	1214.0
29479	700.3076	46.68	47.7	99.9183							2972		4300						1790																15	GKSGSGK	Phosphoryl STY(3)	PTM	5	11	b2b3-H3PO4y2y3∞y7	5	5.233	5.825	0.0016	1	2	700.3077	1432.0
29494	700.3905	28.03	27.18	38.9197																												9271	9689	12014	28	LPVEDK		PEP_FRAG_1	820	825	b4y2y3∞y4y5	5	7.7772	7.7772	0.0000	3	4	700.3909	7646.0
29496	700.3625	25.5	25.12	37.4337																												2138	3390	1726	28	ALPEDR		PEP_FRAG_1	1160	1165	y4	1	5.6053	5.6053	0.0019	1	3	700.3616	1571.0
29500	700.4361	32.28	31.43	101.924																												6162	7027	7046	30	LAQQIK		PEP_FRAG_1	45	50	b3b4b4*b6y6y6*	6	5.8797	5.8797	0.0016	2	2	700.4359	5094.0
29501	700.4373	32.48	31.38	42.896	3600																														1	IQALQK		PEP_FRAG_1	120	125	y4y6*	2	5.0691	5.1753	0.0022	1	3	700.4373	3600.0
29518	700.4343	30.67	33.19	102.266																											5941				27	IINVGGK		PEP_FRAG_1	54	60	y3y7	2	6.7416	6.7416	0.0011	1	5	700.4343	5941.0
29525	699.4416	42.42	44.48	40.5182				5085	4078		3906	3758			2835	3101		3645		3732			5669	5494	4676	3480	3575		3804	4377	4872				12	ISPAALK		PEP_FRAG_1	277	283	b5y6	2	5.5838	5.7075	0.0017	4	7	699.4415	2389.0
29526	700.4171	37.28	36.22	38.332		18726																										25088	27756	28192	29	GFVLHK		PEP_FRAG_1	322	327	b2y2y3y4	4	8.2005	8.5066	0.0000	4	30	700.4181	21721.0
29527	700.4332	34.86	33.67	102.28	46947	49508	45532																												2	IINVGGK		PEP_FRAG_1	54	60	b4y3y7*	3	6.7376	6.7416	0.0011	2	5	700.4342	15674.0
29530	700.4159	37.65	36.6	38.673			4863																												3	GFVLHK		PEP_FRAG_1	322	327	y2y3y4	3	6.7566	8.5066	0.0000	1	30	700.4159	4863.0
29531	700.4164	37.69	36.66	38.885	5435																														1	GFVLHK		PEP_FRAG_1	322	327	y2y3y4	3	7.2646	8.5066	0.0000	1	30	700.4164	5435.0
29561	700.4371	36.16	38.45	41.3793				2117																2401		1696	1618		1650	1769	1950				25	NVLINK		PEP_FRAG_1	154	159	y4	1	7.4204	7.9813	0.0000	3	10	700.4367	1009.0
29580	700.4364	48.09	47.81	103.919		11238	14119			2262			2086										1766									9473	9873	10592	29	EAVILR		PEP_FRAG_1	733	738	b3b4y6	3	5.9723	5.9723	0.0016	2	2	700.4377	7303.0
29582	700.3697	50.55	49.93	39.1467	14499	14766	13194																									13667	15118	14220	29	TGFTFK		PEP_FRAG_1	49	54	b4y2y6	3	6.5799	7.3197	0.0005	2	27	700.3708	11625.0
29605	700.4172	33.25	35.39	38.5814				25569	23658	18828	28443	30729	20805	23942	32300	33609		33603	25516	28685	28251	26929	30062	31780	37707	25004	24271	26641	26600	27271	30828				21	GFVLHK		PEP_FRAG_1	322	327	b2b3y2y3y4	5	8.5066	8.5066	0.0000	23	30	700.4168	40109.0
29607	700.4358	50.82	52.67	102.793				7485			9533	8341		5140		6967							8693		8365				6815	6566	6004				4	ELGLIR		PEP_FRAG_1	830	835	y4	1	7.0821	7.0821	0.0006	1	3	700.4355	5252.0
29616	700.3688	39.13	40.73	101.554				11558	9889	11846	8224	8599			7970	8962	7296	7168		8749	11007		15294	13045		8693	8369	9091	10130	9473	8982	7041	6608	7728	30	TGFTFK		PEP_FRAG_1	49	54	y5∞y6	2	6.0133	7.3197	0.0005	1	27	700.3691	5436.0
29619	700.4276	59.1	60.46	107.929						2149													1559		1365										21	TELLPK		PEP_FRAG_1	142	147	y2y3y6	3	5.221	5.6647	0.0017	1	5	700.4274	1000.0
29627	700.4357	52.59	54.34	41.0613				2247	2651		2372	2010							1405	1518				2341		1650		1668							22	LPPVFK		PEP_FRAG_2	235	240	y5	1	6.5247	6.7249	0.0011	2	6	700.4359	1025.0
29628	700.3693	62.96	63.87	103.963									1412							1216	1650														17	TGFTFK		PEP_FRAG_1	49	54	b3∞	1	4.8411	7.3197	0.0005	1	27	700.3679	1951.0
29661	698.432	53.48	54.98	41.462																								2161							24	MPLPLK		PEP_FRAG_1	468	473	y3y5	2	6.2909	6.3766	0.0013	1	6	698.432	2161.0
29662	698.433	53.02	54.91	41.772																							1809								23	MPLPLK		PEP_FRAG_1	468	473	y4	1	5.2104	6.3766	0.0013	1	6	698.433	1809.0
29663	700.4454	53.22	54.97	41.6136				4705	4969		7736	6960				1946		7406	7004							12089	12203	12179	10292	11771	9992				22	LVMLPK		PEP_FRAG_1	39	44	y3y5	2	6.5558	6.5558	0.0011	1	2	700.4452	9241.0
29667	700.4631	46.92	45.88	41.916			37996																												3	IVELVK		PEP_FRAG_1	686	691	b2b3b4y2y3y4y4∞y5	8	6.8068	6.8566	0.0011	1	2	700.4631	37996.0
29670	700.4625	47.01	46.21	41.963		46304																													2	IVELVK		PEP_FRAG_1	686	691	b2b3b4y2y3y4y4∞y5	8	6.8566	6.8566	0.0011	1	2	700.4625	46304.0
29675	700.3719	54.01	55.45	106.951				11081	11768	10079	30516	31347	38699	29163	36655	37727	20554									10237	9822	9152							13	TGFTFK		PEP_FRAG_1	49	54	y3	1	5.6642	7.3197	0.0005	1	27	700.3678	14683.0
29683	700.4996	62.94	62.89	40.3873																												2887	3930	4096	30	LLTLIK		PEP_FRAG_1	1353	1358	b3y4	2	6.2533	6.2533	0.0013	2	6	700.4993	2577.0
29717	700.4972	60.65	62.36	40.4349				3824	2305			1751								1517	1876				1554	3591	1837	3317							16	LLTLIK		PEP_FRAG_1	1353	1358	y4	1	5.8966	6.2533	0.0013	3	6	700.4976	1259.0
29718	700.4983	62.37	62.37	109.291						2918																									6	LLTLIK		PEP_FRAG_1	1353	1358	b4y2y6	3	5.8853	6.2533	0.0013	1	6	700.4983	2918.0
29728	700.3703	47.65	49.32	38.929				19485	19359	13354	16966	15119	12792	11318	15923	15909		12527	14023	14162	16709	16787	19667	21293	21589	18229	20263	15376	17836	14012	14224				20	TGFTFK		PEP_FRAG_1	49	54	b3b4b4∞y3y5	5	7.3197	7.3197	0.0005	22	27	700.3695	21206.0
29734	700.4588	42.76	44.86	105.111																			3002												19	LVEVIK		PEP_FRAG_1	180	185	b3b4	2	6.1535	6.9579	0.0008	1	4	700.4588	3002.0
29735	700.4609	42.64	44.9	105.069																					2776										21	LVEVIK		PEP_FRAG_1	180	185	b3b4y4	3	6.4783	6.9579	0.0008	1	4	700.4609	2776.0
29740	700.3898	34.5	36.03	102.996	18151	17435	18960	103214	98975	118982	93822	87759	99082	106785	105329	105721	79168	86447	108635	141746	127631	116964	137859	135826	143141	104965	110916	116080	124731	120468	121466	92409	94952	95745	26	DLPVEK		PEP_FRAG_1	1099	1104	b2b3b4b5y1y2y2∞y3y4y4∞	10	7.5313	7.5313	0.0001	17	17	700.3899	87586.0
29770	701.3847	36.53	35.69	99.8827	9540	10167	8457																									5149	5645	5399	29	LLGSQPS		PEP_FRAG_1	618	624	b5b7∞y2	3	6.8977	7.6178	0.0000	2	17	701.3853	3747.0
29786	701.3935	37.7	39.58	105.353																		2917													18	GILQDR		PEP_FRAG_1	282	287	b6y4y6	3	5.9193	6.5064	0.0011	1	12	701.3935	2917.0
29793	701.4548	44.04	43.33	107.984																														3415	30	AISVLAK		PEP_FRAG_1	104	110	b3b4∞y2y3y7	5	6.1699	7.6646	0.0000	1	8	701.4548	3415.0
29803	701.3837	32.69	34.99	100.223				11027	10939		11581	10625	11177		7897	7958	10592	9057		11587		9847	13721	13649	14100	9144	9197	10319	9086	8707					19	LLGSQPS		PEP_FRAG_1	618	624	b3b4b5b5∞b7*y2y3	7	7.6178	7.6178	0.0000	13	17	701.3847	13353.0
29804	701.3962	46.04	45.37	103.388																												18672	19393	19290	29	GILQDR		PEP_FRAG_1	282	287	y1y3y3*y4y4*	5	6.282	6.5064	0.0011	1	12	701.3961	15008.0
29819	701.4213	35.7	34.91	39.1641	13716	16448	13681			23537																						34174	35711	33057	28	VDNIIK		PEP_FRAG_1	517	522	b2b3b4b5y1y4y5	7	9.0357	9.0357	0.0000	4	11	701.4213	28326.0
29820	701.4173	31.96	34.48	39.0501				3897	7842									10747						2497					6296	8645	20696				27	VDNIIK		PEP_FRAG_1	517	522	b3b4y2y4y5	5	8.0807	9.0357	0.0000	4	11	701.4185	12721.0
29822	701.4191	32.07	34.4	101.558											7008	9306	7069									8720		7038							12	VDNIIK		PEP_FRAG_1	517	522	b3b4y2y5	4	8.2848	9.0357	0.0000	2	11	701.4212	10004.0
29828	701.4567	47.87	47.31	107.28																														6992	30	TGLIIGK		PEP_FRAG_1	388	394	b3b4y2y3y6	5	7.0074	7.8037	0.0000	1	18	701.4567	6992.0
29840	701.4557	37.24	38.6	107.124				2391	1898	2730	1816	2231	3509			3005				2161	2362	2115	2574		2489	1683		1697				3071	3440	4116	12	AVTALVK		PEP_FRAG_1	271	277	b4b4∞y1y5	4	5.3605	5.3605	0.0025	2	2	701.4588	2421.0
29848	701.4173	39.29	40.93	103.027				3866	3266		2555		3490							4606		4016	5051	3911	4304	4484	4451	4628	3191	3266	2801		2835	3180	5	DAVVVAK		PEP_FRAG_1	68	74	b2y4y7	3	5.0924	5.8026	0.0016	1	3	701.4182	2080.0
29860	701.4576	51.28	53.11	42.2061				5877	5639		4395	3790						4958								5044	4548	5820	3989	4527	4072				23	QLLSLK		PEP_FRAG_1	783	788	y3y4	2	7.102	7.102	0.0006	5	6	701.4576	2885.0
29861	701.456	53.88	53.42	107.259																														2462	30	QLLSLK		PEP_FRAG_1	783	788	y3y6	2	6.5893	7.102	0.0006	1	6	701.456	2462.0
29934	701.4574	44.85	46.58	39.3278				12478	12070	10313	13023	6907		12447				8207	7012	13042	5567	6054	7907			8005	13146	12427	13675	15471	14696				25	TGLIIGK		PEP_FRAG_1	388	394	b3b4y2y3y4y5y6	7	7.609	7.8037	0.0000	12	18	701.4577	9321.0
29943	701.4562	71.25	72.46	107.739				1549		2557			2785		2082	2118				3630		3445	2385	2717	3108		1881					3103	2938	2450	16	GTIIGIK		PEP_FRAG_1	1124	1130	b3b4y3y7	4	5.7066	6.6362	0.0011	1	3	701.4566	3061.0
29947	702.4173	34.34	33.6	105.78																														3639	30	NINITK		PEP_FRAG_1	549	554	y4y6	2	7.3529	7.3529	0.0004	1	2	702.4173	3639.0
29949	702.4163	34.31	33.62	106.237																												3129			28	NINITK		PEP_FRAG_1	549	554	y4y6	2	7.2593	7.3529	0.0004	1	2	702.4163	3129.0
29951	701.457	40.94	42.72	108.59				8161	6683	5123	8053	9499	6289	5469	6332	6519	8094	6630	7558	9793	9603	8133	6742	5402	5718	7415	7622	9193	7971	6159	6131				16	AISVLAK		PEP_FRAG_2	104	110	b2b3∞b4b4∞b5y2y3y5y5∞	9	7.6646	7.6646	0.0000	7	8	701.4585	11315.0
29987	702.4045	51.0	50.41	104.579																												2583	2903	3015	30	TVLLEQ		PEP_FRAG_1	437	442	b3	1	5.0225	5.497	0.0020	1	5	702.4042	1914.0
29993	701.4325	52.53	54.11	108.874				120391	117460	130817	105363	98617	139040	100310	100200	100141	82236	72256	109467	89539	123046	110879	99180	103223	99255	107185	103880	94635	94685	92601	94061				20	LLTAQR		PEP_FRAG_1	566	571	b2b3b3∞b4∞b6y1y2y2*y3y3*y4y4*y5y5*y5∞y6*	16	6.9457	6.9457	0.0009	7	7	701.4332	105793.0
29995	701.3966	43.33	45.07	103.908				16300	16705	18195	11658	11478	12333	14505	16100	14710	11831	8992	15229	15948	17548	15015	23159	24515	24518	13703	14339	13630	16680	16676	15580				20	GILQDR		PEP_FRAG_1	282	287	b6y3y3*y4y4*y6*	6	6.5064	6.5064	0.0011	10	12	701.398	25262.0
29999	702.4166	43.89	45.52	107.308				5615	5154			3408	5408	2830			3463			5553	5907	5641				4597	4472								5	LDLSVR		PEP_FRAG_1	90	95	b3y2y6	3	6.2916	7.4782	0.0001	2	6	702.4164	3345.0
30007	702.3802	37.27	38.65	103.295					5745	6196	5459	5441	6513		5967	6763	4586	4188		5902			5324	5202		5567		4556		4241		6634	6594	6100	11	GGEQAIK		PEP_FRAG_1	67	73	y3y7	2	6.8654	6.8654	0.0011	1	3	702.3809	5726.0
30013	702.3835	46.85	48.55	102.243						6393		4263		4375	5371	5670				8920	4180	7936		9538	8441			4811	6749	6357	7138				16	VPPDFK		PEP_FRAG_1	558	563	b6y5y6	3	5.9703	5.9703	0.0015	2	2	702.3842	9741.0
30028	702.4064	54.5	56.02	103.957					1595	2280					3024	3173				4010	3498	3547				4145	4440	4398							11	TVLLEQ		PEP_FRAG_1	437	442	y3∞y4∞y6	3	5.497	5.497	0.0020	2	5	702.4059	2323.0
30059	702.3793	36.57	38.01	100.676	7533		5704	4763	4487						4613	4429	3529	3237	4884	5917		5632	6292	6156	6291		6071	6111	6305		5089	4363	5122	5081	14	GGEQAIK		PEP_FRAG_1	67	73	y4y7	2	5.4417	6.8654	0.0011	1	3	702.3794	1586.0
30061	702.3799	34.96	37.09	100.69				3826	3706	4347	2934			3216	4435	4337	6303	7531	9222	6172	5470	5569	4885	4895		5867	5413	5329	3747	3011	5219				22	TPDTIR		PEP_FRAG_1	394	399	y5∞y6	2	6.4916	7.4224	0.0003	1	2	702.3804	4299.0
30092	702.4165	46.49	48.25	40.4251				5404	3925		4658	4267			1938			9679	10792	5954	6287		4950	5098	5168	6117	4163	6533	4073	2378	2599			1728	15	LDLSVR		PEP_FRAG_1	90	95	b4∞y1y4y5y5∞	5	7.4782	7.4782	0.0001	4	6	702.4165	10728.0
30101	703.3987	27.41	26.6	38.1483																												13723	12669	11680	30	IASDGLK		PEP_FRAG_1	57	63	y2y3y5y6y6∞	5	7.7978	7.7978	0.0000	2	2	703.3984	9740.0
30117	702.38	41.9	43.5	100.25				4146	4076		3446	3007			2506	2529	4789	3727	6916	4082	5502	5074	5826	5816	5618	4258	3841	4714	4053	3482	3199	3455	3811	4061	24	DAEVLR		PEP_FRAG_1	205	210	y4y6	2	6.712	6.712	0.0011	8	9	702.3801	3322.0
30124	702.4035	41.9	43.17	97.9514	7455		7140	11806	10409	9838	11950	11415	11546	7633	9583	9730	9373	8162		10841	9100	8640	9408	9639	8234	10331	10697	9547	8612		8296	8927	9520	10474	29	TAPTVIT		PEP_FRAG_1	556	562	b5b5∞b6y5	4	7.349	7.349	0.0004	25	26	702.4049	6945.0
30128	702.4405	52.22	53.88	104.722				10123	9369	8612	9439	9026		8834	9005	9448	9409	6809					8544			10417	10370		7449	7908					12	EISLLK		PEP_FRAG_1	51	56	b2b3b3∞b4b4∞y2y3y4y6	9	7.8241	7.8241	0.0000	6	6	702.4416	9286.0
30137	702.3951	55.33	56.64	110.952				3015	2966	2765	1965	2253					2452		1557	2819	2743	2425	3291	3408	3498		1850	1626	2449	2439	2757	11770	12393	11166	6	NLAAWK		PEP_FRAG_1	561	566	b2y2y3y4	4	5.9098	5.9098	0.0016	1	2	702.3948	5655.0
30166	703.4029	40.79	42.4	105.023							6697	7355	7848		5042	5276																			7	DLITNK		PEP_FRAG_1	82	87	y3*y6	2	5.2142	5.2142	0.0022	1	2	703.4034	3939.0
30185	702.3838	32.76	31.95	40.124																													1243		29	TPDTIR		PEP_FRAG_1	394	399	y5	1	7.4224	7.4224	0.0003	1	2	702.3838	1243.0
30196	703.4178	59.72	60.71	108.033						2449						4605						2740													12	SLGWLK		PEP_FRAG_1	105	110	b4	1	5.9737	7.657	0.0000	1	10	703.4172	3763.0
30205	703.4197	55.5	57.41	107.872																1405			3153	2842	2834	6570	5511	5172	5535	4937	3740				20	IGCLLK	Carbamidomethyl C(3)	PEP_FRAG_1	230	235	b3b4y2	3	6.819	6.819	0.0011	1	3	703.4194	2116.0
30207	703.421	58.06	57.69	106.689																														2218	30	IGCLLK	Carbamidomethyl C(3)	PEP_FRAG_1	230	235	b3b4	2	6.596	6.819	0.0011	1	3	703.421	2218.0
30230	702.4416	51.34	52.94	107.598				8709	6897	6225	5466	5752	4347	4527	4849	4957	6569	5933	6547	6730	6063	6847	8347	9733	7753	7397	7087	6361	7503	6177	6392				11	LSLLEK		PEP_FRAG_1	339	344	b3b3∞y3y6	4	7.0862	8.21	0.0000	6	20	702.442	4088.0
30236	703.4369	29.41	28.49	109.297	8501	11702																										9741	8574	9364	30	LTSAIAK		PEP_FRAG_1	138	144	b2b3∞b4∞b5y2y5	6	7.0039	7.0039	0.0007	2	2	703.4372	7380.0
30244	703.414	60.12	61.71	106.262					3369	2571	2653	3480					4891	4522		6834	4289		5727	5014			4128		6049	7816	6862				16	SLGWLK		PEP_FRAG_1	105	110	b2b3b4y2y4	5	7.657	7.657	0.0000	8	10	703.4158	6995.0
30261	702.4529	45.08	46.4	109.925	4692	4748		21353	19111	10900	22655	22557	18291	16776	21502	20620	15919	16332	20947	17315	9593	8884	18510	21622	15545	16986	15559	18279	14608	14201	15963	17756	16867	18328	16	LLTSLR		PEP_FRAG_1	462	467	b4b6y1y3y4y5y5∞	7	8.2706	8.2706	0.0000	4	4	702.453	20305.0
30262	704.3841	28.13	26.96	40.5863	12381	9591	9452																												1	VSELEK		PEP_FRAG_1	1264	1269	y4y5y5∞	3	6.4045	6.4045	0.0013	2	2	704.3828	3229.0
30274	703.4354	51.82	53.56	106.926					4068			3189		4448				3358		4710	6092				4630										16	TVVSVAK		PEP_FRAG_1	225	231	b3y2y3y4y7	5	7.3475	7.3475	0.0004	2	2	703.4363	4458.0
30275	704.3484	27.63	30.18	104.066										5395					12395		10603														10	DEEALK		PEP_FRAG_1	44	49	b3y6	2	5.3901	6.498	0.0011	1	9	704.3481	2049.0
30280	704.3846	29.71	28.79	39.3868	52953	59510	52586																									19260	20352	19366	2	LDSELK		PEP_FRAG_1	252	257	b2b3b4b4∞y2y3y4y5y5∞	9	8.5192	8.5192	0.0000	4	10	704.3835	21137.0
30285	704.3856	33.2	32.25	41.69	14080	20690	18491																											4448	2	TIDDLK		PEP_FRAG_1	202	207	b4y2y4	3	7.8742	7.8742	0.0000	3	5	704.3847	5948.0
30320	704.3996	40.05	42.26	102.095																							1247								23	AEPFIK		PEP_FRAG_1	375	380	b4y4	2	6.12	6.3396	0.0013	1	10	704.3996	1247.0
30321	704.3776	36.14	37.97	101.992							2107		2922											3390			1587		3184	2465					20	ICVQGK	Carbamidomethyl C(2)	PEP_FRAG_1	235	240	y3*y6	2	5.5162	5.5162	0.0020	2	2	704.3777	2808.0
30348	703.3907	58.08	59.6	105.218				31436	27200	30622	23400	25034	26283	21986	23964	25326	19358	19106	18954	27589	26770	28783	26093	26257	23076	18840	20313	19573	25860	22432	21429				12	GVGPAFR		PEP_FRAG_1	4	10	b7y1y3	3	4.9654	5.911	0.0015	1	4	703.3914	27127.0
30374	704.3488	28.38	30.56	104.099	9097			6869	5906		6232	5625	7723		8101	7921	11068	7353		9130		6913	7940	8019	6888	6952	5758	6161	4846	5908	5995	3413			16	DEEALK		PEP_FRAG_1	44	49	b2b3y3y6	4	6.498	6.498	0.0011	7	9	704.3501	11430.0
30377	704.3836	38.75	40.64	102.598				2869	2467	4136	3505	3553	4193		1448	1595	2680			4877	5057	4991	5029	4348	4710	6399	6525	7098	3761	3278	3782				5	EDVTLK		PEP_FRAG_1	20	25	y3	1	5.2853	5.2853	0.0021	1	3	704.3841	1571.0
30393	703.3319	62.6	64.0	98.9995				5396	5142	4484	7606	5990	7283	5072	6296	5748	4935	4383		10439	9210	8797	5683	6094	5280	6720	6247	5677	11952	12073	10396	2728	3049		18	SSISFY		PEP_FRAG_1	185	190	b2b3b3∞b4∞b5y1y2y3	8	7.5382	7.5382	0.0001	23	24	703.3299	16613.0
30399	704.371	50.13	51.44	105.97		6596		21749	20141	19488	17507	19291	18961	19252	24021	24877		15093	15198	30572		22536	32498	29411	21814	23617	22078	22649	29140	31274	29365	12166	13534	14549	21	INMAGAK		PEP_FRAG_1	19	25	b5y2	2	4.8126	4.8126	0.0030	1	2	704.3775	20659.0
30403	704.3961	43.78	45.56	104.626				5900	5647	4588	5269	5351		2892		3633	4922	4071	4958	7190	5407	5568	7127	7874	7555	6328	7044	6253	5319	5593	5886				27	APEFLK		PEP_FRAG_1	1500	1505	b4y6	2	5.1534	5.8205	0.0016	1	4	704.3972	3368.0
30417	704.4457	59.38	59.38	39.866						1250																									6	IIFVGR		PEP_FRAG_1	260	265	b3	1	5.5002	6.7186	0.0011	1	6	704.4457	1250.0
30427	704.3843	45.54	47.03	104.092		7397			6136	7463	6282		6730	4826	5030			5656	8658	5751	6890	5789	7218	7370	6551	5395		6068		6166	6248				16	SLEDLK		PEP_FRAG_1	627	632	b4y4y6	3	5.7562	5.7562	0.0016	2	2	704.3851	5843.0
30448	704.4683	58.25	58.97	109.17									1022				1997		1494		1066														17	VVVFLK		PEP_FRAG_1	54	59	b3y6	2	5.8153	5.871	0.0016	2	5	704.4703	1269.0
30449	704.4729	57.36	59.1	42.5016														2288									2458	2437	2162	2139					26	VVVFLK		PEP_FRAG_1	54	59	b5y2	2	5.871	5.871	0.0016	3	5	704.4721	1281.0
30454	704.447	51.86	53.74	41.957				1051																											4	IIFVGR		PEP_FRAG_1	260	265	y4	1	6.5255	6.7186	0.0011	1	6	704.447	1051.0
30456	705.3988	29.4	28.56	106.173																												93765	93859	97189	29	VISMQK		PEP_FRAG_1	237	242	b2b3b3∞b4b4∞b5y1y2y2*y3y4y4*y4∞y5y5*y5∞	16	9.4914	9.4914	0.0000	3	3	705.3996	82160.0
30468	705.3579	35.02	35.02	36.049						2939																									6	IGSDWK		PEP_FRAG_1	241	246	y2y5	2	6.2528	6.2528	0.0013	1	2	705.3579	2939.0
30476	701.324	32.33	33.97	95.0559	20489	18730	20396	65203	60559	77111	52568	51436	56517	59914	62203	67227	79217	55568	91879	73814	97725	118100	72332	71095	88289	66774	67727	70583	74748	59053	63531	52876	46174	46007	18	DDQPAR		PEP_FRAG_1	1	6	b3b3∞b5b6*y1y3y5y5∞y6*	9	6.6174	6.8707	0.0011	1	2	701.3216	192127.0
30478	701.3233	32.33	33.97	102.77	61672	61989	62639	185866	165959	219122	148843	145461	158475	175048	183840	183732	223949	159205	273829	219379	255901	280097	206147	196098	254619	189861	187919	200694	207984	170433	194218	161467	153476	159367	21	DDQPAR		PEP_FRAG_1	1	6	b2b3b3∞b4b5b6*y1y3y6*	9	6.8707	6.8707	0.0011	1	2	701.3231	293552.0
30482	705.3989	40.69	39.89	104.52																												5519	4880	5484	30	TLVMNK		PEP_FRAG_1	438	443	y4*	1	5.7011	6.5118	0.0011	1	4	705.3985	3623.0
30495	704.3271	62.69	64.27	97.6504				2742			2600	2597	3171		2351	2142	4584	5141	5322	2663	3334		2105	2422	1950	3389	3206	2826	2447	2255	2088				14	EGWALE		PEP_FRAG_1	418	423	b4	1	5.9203	5.9203	0.0015	13	14	704.3268	2474.0
30496	704.4031	50.41	51.58	40.3299	9671	10915	9075	29392	34797		29813	46500		30683	21278	21384		26991	24083	28805	24823	20596	33396	27346	27453	18665	15830	17422				15151	15872	15857	30	LEAMLK		PEP_FRAG_1	945	950	y5	1	6.1147	6.1147	0.0015	4	7	704.4028	11971.0
30497	704.3949	50.61	51.52	106.142							17323		16496					11230	13125			11110											6380		29	LDSTLR		PEP_FRAG_1	1108	1113	y5y6	2	6.3664	6.3664	0.0013	1	3	704.3952	4403.0
30522	705.3549	29.91	32.37	99.7669					1937	4055									3268	3835	4260	4955	4199	4550	5343	2535	2669		2068	2121	2086				21	SQQSAGK		PEP_FRAG_1	145	151	b4b7y7y7*	4	4.71	5.5754	0.0019	3	4	705.3543	4891.0
30523	705.3938	57.44	59.0	102.26							2510	2566		2458		3409	2899	2557																	13	MSGGLLK		PEP_FRAG_1	1	7	b3y7	2	4.7611	6.6458	0.0011	1	2	705.3919	1800.0
30536	704.3787	74.06	75.14	107.067						2768			2611							1868	2746	2581	1648	2082					1635			2700			17	MLDGLR		PEP_FRAG_1	603	608	b6y4∞y6	3	6.2394	7.3762	0.0004	1	5	704.3776	3189.0
30541	705.4323	39.74	38.7	39.135	78738	90468	82372																												2	VFLAQK		PEP_FRAG_1	306	311	b2b3b4y2y2*y3y4y5	8	8.4816	9.2085	0.0000	3	30	705.4322	31223.0
30542	705.4319	39.42	38.52	106.797																												138737	147867	160393	28	VFLAQK		PEP_FRAG_1	306	311	b2b3b4b5y2y2*y3y3*y4y4*y5y5*	12	9.095	9.2085	0.0000	3	30	705.4319	117621.0
30545	705.3783	47.02	48.57	39.1885						2653			1255		4048	2408				2356	2164	2378			1307	4208	2543	3179		2098	2124				6	MAVWAK		PEP_FRAG_1	674	679	b2y3	2	6.0376	6.0376	0.0016	1	2	705.376	5273.0
30562	706.3896	24.92	24.2	40.077			3540																												3	FQNVAK		PEP_FRAG_1	588	593	y1y5*	2	6.3516	6.6848	0.0011	1	2	706.3896	3540.0
30567	706.3901	26.14	25.47	39.7607																												18516	18470	20310	28	VQFQGK		PEP_FRAG_1	355	360	b2y2y3y3*y4y5y5*	7	8.541	8.541	0.0000	3	3	706.3909	16155.0
30590	705.3944	36.41	38.46	104.987				19906	22474		26116	25510	21526				16808			26370	19497		21897	22859	21267	23972	25043	23178	19735	18604					19	ALSTWK		PEP_FRAG_1	174	179	b2b3∞b4b4∞b5∞y1y2y3y4y5∞	10	8.6381	8.6381	0.0000	14	24	705.3952	21809.0
30591	705.395	36.34	38.46	36.881											4597	4979		6322	5541			6411									3340				18	ALSTWK		PEP_FRAG_1	174	179	b2y2y3y4y5∞	5	8.2005	8.6381	0.0000	5	24	705.3947	9407.0
30612	706.3912	36.7	38.53	104.232						7230				4938	8111	7905		4949				5909									5309				14	LFGAGGGK		PEP_FRAG_1	7	14	b8y3	2	5.0779	5.0779	0.0028	1	2	706.3918	2424.0
30613	705.3988	37.74	39.2	104.459	16902	15953		6453	5870	3889	4186	3944		3594	5837	6144	2884		3427	5650			5458	5924	5335	5470	4928	4623	4724	4672	4003	16551	17055	18726	29	ALSTWK		PEP_FRAG_1	174	179	b2b4∞y1y2y3y4y5∞	7	8.4944	8.6381	0.0000	4	24	705.3963	12987.0
30614	705.3923	40.37	39.53	104.969			3417																												3	ALSTWK		PEP_FRAG_1	174	179	y4	1	6.6331	8.6381	0.0000	1	24	705.3923	3417.0
30621	706.3909	46.19	45.37	40.5738	6130	7287	5514																									4542	4321	4311	28	LGDFVR		PEP_FRAG_1	398	403	y3y4y5	3	6.76	7.9063	0.0000	6	28	706.3908	3028.0
30633	704.4108	39.98	41.27	104.964	96427	115975	95999	210409	207087	264687	265665	269040	250349	215372	245148	249782	220335	213224	301493	233996	247741	244078	259997	265199	252691	213160	211286	213548	208760	207627	213958	186619	189728	224837	16	GVPLYR		PEP_FRAG_1	127	132	b2b3b4b5y1y2y3y4y5	9	9.8128	9.8128	0.0000	30	30	704.4117	333262.0
30634	704.4147	40.04	42.12	40.9003				11630	12131		10210	9747						8106		10534	11326				10362	12595	12367	12907	13528						16	LMATLR		PEP_FRAG_1	657	662	y2y3y4y4∞y5	5	7.8563	7.8563	0.0000	8	14	704.4165	12357.0
30635	704.4113	40.51	42.12	106.878						5016			4542	5806	14544	14714	4357		4860			5248	14472	10658						12411	11841				19	LMATLR		PEP_FRAG_1	657	662	y2y3y4	3	7.5638	7.8563	0.0000	2	14	704.4144	10311.0
30636	704.4128	43.35	42.55	106.781																												16493	17999	18241	30	LMATLR		PEP_FRAG_1	657	662	b4∞y3y4y5	4	7.793	7.8563	0.0000	3	14	704.4142	13952.0
30674	705.3979	46.7	48.13	102.017				10332	11175	9189	8503	8063	9485	11620	12395	11965		7012	8191	10736	12134	11415	12014	12336	12925	11565	11398	10492	13081	13790	13127	7613	8093	8627	18	MSGGLLK		PEP_FRAG_1	1	7	y6y7	2	6.6458	6.6458	0.0011	1	2	705.3967	20316.0
30681	705.4313	35.45	37.46	107.062				150597	151132	174671	188122	180262	176574	127220	180534	201101	102025	119669	127081	171332	129927	69406	163840	157067	163024	159189	149254	150672	152842	140620	149727				12	VFLAQK		PEP_FRAG_1	306	311	b2b3b4b5b6y1y2y2*y3y3*y4y4*y5y5*y6*	15	9.2085	9.2085	0.0000	24	30	705.4313	267578.0
30682	706.4519	45.06	44.27	109.499																												23889	23874	30847	30	IVLYAK		PEP_FRAG_1	501	506	b2b3b4y1y3y4y5y6	8	8.5504	8.5504	0.0000	3	27	706.4522	24323.0
30688	706.4382	46.93	46.26	40.2043																												12520	13038	11826	30	AHPLLR		PEP_FRAG_1	909	914	y3	1	4.9016	6.1975	0.0013	1	3	706.4379	8803.0
30696	706.4529	46.73	46.08	112.575																												11871	7651	13337	28	YIVLAK		PEP_FRAG_1	392	397	b2b3y1y2y3y4y5	7	7.7152	7.9147	0.0000	3	27	706.4524	9263.0
30697	706.4378	47.44	46.55	40.6513	11838	12765	12033																												2	AHPLLR		PEP_FRAG_1	909	914	y3	1	4.1938	6.1975	0.0013	1	3	706.4391	3010.0
30698	706.4121	51.7	51.23	107.5																														1436	30	FGEILK		PEP_FRAG_1	112	117	b3y6	2	5.354	6.4166	0.0013	1	12	706.4121	1436.0
30706	706.4152	53.26	52.75	105.868																												14491			28	FLELGK		PEP_FRAG_1	615	620	b2b3y2y3y4y5y6	7	6.7105	7.6172	0.0000	1	15	706.4152	14491.0
30708	706.4147	53.25	52.67	41.309																														43893	30	FLELGK		PEP_FRAG_1	615	620	b2b3b4y2y3y4y4∞y5	8	7.2883	7.6172	0.0000	1	15	706.4147	43893.0
30709	706.4475	49.96	51.31	110.635						2094			1988							1462	1461	1272	3202	2912	2816										6	LIGIYK		PEP_FRAG_1	1262	1267	b3b4y2y3y4	5	6.4914	6.4914	0.0011	5	7	706.4508	2923.0
30714	706.4524	53.01	52.54	112.149																												7247	8193	14331	29	YVALLK		PEP_FRAG_1	507	512	b2b3b4y2y3y4y6	7	7.328	7.3573	0.0004	3	27	706.4528	5903.0
30716	706.391	66.82	68.17	104.291				2150		3872			3474		2146				3467		3681	3400	3708	2763	3124		2187	2281	2267	2411					21	ELAAFR		PEP_FRAG_1	1191	1196	b3y6	2	4.6087	4.6087	0.0031	1	3	706.3912	2345.0
30735	706.3919	42.94	44.89	40.3302				9935	10310		11537	10927		10285	10139	10661		12031	8341	8550	6214	6912	11442	9818	9855	8553	8618	9075	6648	6875	7312				19	LGDFVR		PEP_FRAG_1	398	403	y3y4y5	3	7.9063	7.9063	0.0000	21	28	706.3902	10823.0
30744	706.4144	48.92	50.7	38.2004																1242	1665					1932	2037	2001							24	LIDAFK		PEP_FRAG_1	220	225	y4	1	5.6126	5.9707	0.0016	1	2	706.4177	1343.0
30745	706.4141	70.4	71.6	106.825						2828									1640	1442	2550	2402	1844	1984		1929									16	IADFLK		PEP_FRAG_1	59	64	b3y6	2	5.764	7.5711	0.0000	3	12	706.4143	1202.0
30746	706.438	43.99	45.85	40.1688				7937	7250	5003	11378	12116			2497	2561		9790		16846	14268	12167	11144	10694	11064	17274	18679	17698	10789	11319	12117				17	AHPLLR		PEP_FRAG_1	909	914	b2b3b4b5y3y6	6	6.1975	6.1975	0.0013	1	3	706.4384	26435.0
30768	706.3649	39.51	41.21	101.488	107090			211390	203642	253570	176363	178266	214377	213760	183391	186042	158233	137053	223564	185960	248880	223265	155163	163606	144586	193276	185450	215801	177667	161062	170972				17	SLTEEK		PEP_FRAG_1	429	434	b5b6y4∞	3	5.9377	5.9377	0.0016	2	2	706.3627	457852.0
30779	706.4152	51.3	52.31	106.296						18196			20999											57307	29567										20	FLELGK		PEP_FRAG_1	615	620	b2b3b4y2y3y4y4∞y5	8	7.5671	7.6172	0.0000	3	15	706.4163	57899.0
30785	707.3752	33.48	32.56	37.3342	16040	17837	16611																									13759	14168	13006	30	LFDANK		PEP_FRAG_1	29	34	b2b3b5*y3y4y5	6	8.4942	8.4942	0.0000	6	7	707.3746	9950.0
30789	706.4467	53.29	54.86	108.063				5517	5629	3230	4352	5491	4114	3127		4959	4376	3099	3662	5684	5232		6258	6517	5762	5393	4768	5149	5204	6180	5773				16	VIFLSK		PEP_FRAG_2	57	62	b2b3y2y3y4y5	6	6.6945	6.6945	0.0011	5	11	706.4459	5664.0
30800	707.3698	37.96	39.83	103.527				20091			16218	17460	14544					5316					20178	19950	16306										20	NFLGEK		PEP_FRAG_1	116	121	b2b3y2y3y4y5	6	7.7839	7.7839	0.0000	5	5	707.3711	20833.0
30813	706.4261	45.04	46.73	108.114				4251	3939	2812	2730	2576	3790	3135	5040	6325	11340	11185	12911	5459	4768	4789	3713	3912	3309	4949	5003	4769	2466	2250	1977				15	TLFVAR		PEP_FRAG_1	104	109	b2b3y3y4	4	7.4005	7.4005	0.0003	3	3	706.4249	12945.0
30816	706.3818	59.26	60.41	103.434	6142	4684	5438	6152	5335	5060	5241	5188		4555	5687				4915	5859	6149	5494	6259	6153	6169	7129	6835	6699	8281	6854	7439	6587	6547	7510	28	VESIMK		PEP_FRAG_1	302	307	b2b4b4∞y2y4y6	6	6.5478	6.5478	0.0011	1	3	706.3823	4782.0
30820	706.4515	43.77	45.5	113.392				15697	14791	7323	15077	14968	10403	11416	13409	12830	8091	9740	10785	14267	6695	6604	17725	17142	17161	11689	12095	11663	15995	15784	16212				27	YIVLAK		PEP_FRAG_1	392	397	b2b3b4y2y3y4y5	7	7.9147	7.9147	0.0000	24	27	706.4518	9882.0
30836	707.4132	32.54	31.79	40.125																												1190			28	VFNVTK		PEP_FRAG_1	166	171	y5	1	5.4741	5.6492	0.0018	1	2	707.4132	1190.0
30837	707.4091	32.59	31.78	39.953																														2321	30	VFNVTK		PEP_FRAG_1	166	171	b4*y5	2	5.6492	5.6492	0.0018	1	2	707.4091	2321.0
30882	708.3704	30.54	29.69	39.2567																												1729	1611	1782	29	GTFVER		PEP_FRAG_1	99	104	y4	1	6.0337	7.2911	0.0005	1	9	708.3718	1075.0
30883	708.3699	29.5	29.5	107.8						4398																									6	LDAAYR		PEP_FRAG_1	448	453	y1y2y4y5y5∞	5	5.9791	5.9791	0.0016	1	2	708.3699	4398.0
30885	707.4107	40.49	42.51	109.389								1929			3029	2646			2006			1981	2136	2114	2076		1699			1730					12	YLGLNK		PEP_FRAG_1	514	519	b2b3y2y4y6	5	6.7808	6.7808	0.0011	3	6	707.4113	2066.0
30888	708.358	35.0	33.77	102.433	1266																														1	EDVAFK		PEP_FRAG_1	74	79	b3y6	2	5.9612	6.9299	0.0009	1	3	708.358	1266.0
30900	708.3344	30.51	33.09	97.9334																1957	2754					2441	2801	2272							22	TPSPVK	Phosphoryl STY(3)	PTM	179	184	y4-H3PO4y6y6-H3PO4	3	0.0	0.0	0.0016	2	2	708.3346	1675.0
30913	708.3574	37.74	39.87	97.9913																3603		2898	2085			2957		2739	1654						16	EDVAFK		PEP_FRAG_1	74	79	b3	1	6.9299	6.9299	0.0009	1	3	708.3594	3393.0
30918	706.4497	60.13	60.13	110.405						4775																									6	VLISFK		PEP_FRAG_1	82	87	b2y3y4y6	4	6.9787	7.5193	0.0001	1	19	706.4497	4775.0
30919	706.4486	58.97	60.1	110.54													1448																		13	IVLYAK		PEP_FRAG_1	501	506	y3	1	5.8068	8.5504	0.0000	1	27	706.4486	1448.0
30932	706.4522	50.38	52.0	112.651				12784	10585	5448	9533	9243	5324	4031	2853	4605	7960		11206	11901	6218	6607	12639	11038	7361	13198	12597	12327	10917	11063	10750				23	YVALLK		PEP_FRAG_1	507	512	b2b3b4y3y4	5	7.3573	7.3573	0.0004	22	27	706.4517	9815.0
30933	706.4512	52.27	51.7	110.115																												1613	1866	2038	30	LIGIYK		PEP_FRAG_1	1262	1267	b3y4	2	6.151	6.4914	0.0011	1	7	706.4494	1291.0
30934	706.4551	50.25	52.0	41.852														5833																	14	YVALLK		PEP_FRAG_1	507	512	b2b3y4	3	6.4803	7.3573	0.0004	1	27	706.4551	5833.0
30939	708.3712	53.0	54.34	103.287										1540																					10	GTFVER		PEP_FRAG_1	99	104	b4y6	2	5.5324	7.2911	0.0005	1	9	708.3712	1540.0
30942	706.4272	42.47	43.7	40.1985	46326	47364	48558	75834	74743		74778	70696		70107	70073	73549		66167	54652	59801	49719	46421	73844	83338	76277	64437	65960	60982	68480	66076	65220	82896	94329	98739	30	YVGLVR		PEP_FRAG_1	751	756	y4y5	2	6.8032	7.4527	0.0002	1	13	706.4247	1033.0
30943	706.4267	41.13	43.07	41.306				6185	3472		5355	5196		3530				9979	11214	6672						5851	5610	6398		3781					14	YVGLVR		PEP_FRAG_1	751	756	y3y4y5	3	7.4527	7.4527	0.0002	10	13	706.4269	5302.0
30945	706.4246	43.6	43.63	108.626						7180			13254				10106																2838		6	VVYVAR		PEP_FRAG_1	125	130	y4y6	2	6.6352	6.6352	0.0011	1	2	706.4268	20469.0
30959	707.3745	38.96	40.8	105.706				36183	30442	36953	20286	19581	23512	13438	11340	12533	22670	19292	28427	25306	30110	24477	40489	38209	38084	16197	17688	20497	20256	18708	17198				21	QGDFIK		PEP_FRAG_1	115	120	b3b4b4*b5b5*y2y5∞y6y6*	9	6.5418	6.5418	0.0011	6	6	707.3738	39541.0
30967	707.3505	43.47	45.34	102.72							10983	11111		9323			6894	6373		26210	25341	24960	16049		15427	13679	13956	14147	27075	25879					16	QAEFGR		PEP_FRAG_1	112	117	b4b6*y1y2y6	5	6.2182	6.3508	0.0013	1	4	707.3505	31702.0
30974	708.3944	36.05	38.5	38.334																					1382										21	LYLGDK		PEP_FRAG_1	573	578	y3y5	2	7.015	7.015	0.0007	1	2	708.3944	1382.0
30980	707.4104	46.55	47.65	105.88	5784	5108	5548	9152	9310	9181	7480	7088	8002					3542		7541	8039	7883	6951	7440	6875	8320	8156	7909	6364	6281	6453	8674	9532	9716	2	YLGLNK		PEP_FRAG_1	514	519	b3y6	2	4.7733	6.7808	0.0011	1	6	707.41	1206.0
30986	708.3702	31.7	33.13	40.179	7848	8205	6674	17727	16808	17899				11949				14983	12058	19165	14330	16070				17942	15852	18505	13025	14436	14030	13460	14281	14777	16	YALGER		PEP_FRAG_1	74	79	b2y3y4y5	4	8.3158	8.3158	0.0000	20	27	708.371	25131.0
30987	708.3694	30.76	33.05	107.497							19530	17307	21273		20938	20704							16870	19344	17964										19	YALGER		PEP_FRAG_1	74	79	b2y1y3y4y5	5	8.194	8.3158	0.0000	7	27	708.3692	16643.0
30998	708.3955	42.47	43.96	108.484						2528					1453				2455		2875	2747				1675		1564							17	ITFAEK		PEP_FRAG_1	262	267	y3∞y4	2	5.1413	5.1662	0.0028	1	2	708.3945	3373.0
31004	708.3945	58.91	59.8	106.893						2249			1746		1578	1451			1459																15	GDLYIK		PEP_FRAG_1	327	332	b4y6	2	4.9341	6.2618	0.0013	1	5	708.3948	1155.0
31012	708.4142	63.75	63.71	108.965																													2820		29	ILGFMK		PEP_FRAG_1	219	224	b3y2y4y5	4	7.1288	8.1366	0.0000	1	21	708.4142	2820.0
31013	708.4128	63.73	63.81	40.977																														3590	30	ILGFMK		PEP_FRAG_1	219	224	b3y2y4y5	4	7.31	8.1366	0.0000	1	21	708.4128	3590.0
31014	708.4123	63.74	63.78	41.211																												1490			28	ILGFMK		PEP_FRAG_1	219	224	y2y5	2	6.5041	8.1366	0.0000	1	21	708.4123	1490.0
31015	708.3735	55.28	57.02	41.0013				18527	15751		29698	15474			10227			13692	10647	20851	13485		31307		29938	27275	28980	25717	18379	27931	31397				15	GTFVER		PEP_FRAG_1	99	104	y3y4	2	6.2432	7.2911	0.0005	1	9	708.3682	10535.0
31022	708.4315	39.41	38.46	38.6668	12607		11451																									9956	9575		28	IFVTTK		PEP_FRAG_1	211	216	b2y2y3y4y5	5	7.6922	8.0881	0.0000	4	29	708.4316	7584.0
31023	708.4298	39.27	38.35	104.171																														6963	30	IFVTTK		PEP_FRAG_1	211	216	y3y4y5	3	7.4133	8.0881	0.0000	1	29	708.4298	6963.0
31024	708.4344	39.58	38.62	38.423		2554																													2	IFVTTK		PEP_FRAG_1	211	216	y2y3y4y5	4	7.4532	8.0881	0.0000	1	29	708.4344	2554.0
31030	708.4298	39.86	41.56	109.483					1608				1214		1647						1328		3319		1713										5	YSVIVK		PEP_FRAG_1	250	255	b3	1	5.47	5.47	0.0020	3	7	708.4317	1024.0
31041	708.3952	39.55	41.11	106.437				7972			3693		4085	9584	7792	7634			8689	6756	9057	8015	11737	10791	11065	7231	7075	7537	9525	9438	9605	7132	8108	8182	20	GDLYIK		PEP_FRAG_1	327	332	b3b4y4	3	6.2618	6.2618	0.0013	2	5	708.3961	10806.0
31066	709.3515	36.9	36.39	104.83									3796																						9	GVGDSFK		PEP_FRAG_1	523	529	y5∞y7	2	6.6023	7.467	0.0001	1	12	709.3515	3796.0
31078	709.3456	37.69	40.07	37.11																					1003										21	FSGGWR		PEP_FRAG_1	452	457	y5	1	6.0388	6.8307	0.0011	1	14	709.3456	1003.0
31079	709.3447	37.6	40.05	36.903																1421															16	FSGGWR		PEP_FRAG_1	452	457	b2y5	2	6.0917	6.8307	0.0011	1	14	709.3447	1421.0
31080	709.3447	40.3	40.3	37.143						3326																									6	FSGGWR		PEP_FRAG_1	452	457	y4y5	2	6.8307	6.8307	0.0011	1	14	709.3447	3326.0
31088	706.4151	54.26	56.03	42.1511				9896	10092		9199	5031		7430	8934											10582	10317	10577	9146	8995	9871				4	IADFLK		PEP_FRAG_1	59	64	b3y3y5	3	7.5711	7.5711	0.0000	7	12	706.4156	7280.0
31094	709.3543	45.07	45.07	38.18						1571																									6	SAEAFGK		PEP_FRAG_1	401	407	b2y3	2	6.5623	6.5623	0.0011	1	2	709.3543	1571.0
31100	708.4788	33.15	35.55	41.6668				1885	1828		2442	2759			2203				2026	1973			1804	1773	1964	1807	1709	2151	3063	3141	2539				22	VLLHVK		PEP_FRAG_1	2	7	b2y4y5	3	5.7399	5.7399	0.0017	4	5	708.4799	1230.0
31104	708.3696	44.61	45.83	102.126	32939	32522	32587	66891	64315	65954	66121	58844	75685	51087	54158	49552	47691	43895	61398	83349	84901	85376	85416	88832	82658	67018	68506	67382	68888	73594	71269	50523	48791	49413	16	ADIFSR		PEP_FRAG_1	189	194	b2b2∞b3b3∞y1y2y3y4	8	7.4528	7.4528	0.0002	3	3	708.3703	107582.0
31111	708.4306	35.73	37.82	38.5823				10373	11030	9234	12720	12346		3504	7102			9001	9167	10701	10640	9153	8375	8679	8320	10852	10586	9957	8486	7342	6730				16	IFVTTK		PEP_FRAG_1	211	216	y3y4y5	3	8.0881	8.0881	0.0000	20	29	708.4317	13136.0
31112	708.4281	36.62	37.76	104.288									12251			7537	4701																		9	IFVTTK		PEP_FRAG_1	211	216	b2b3y3y3∞y4	5	7.6976	8.0881	0.0000	3	29	708.4297	14705.0
31116	708.3583	32.61	35.0	102.635																			18826		20046			17332	13632	11506					24	DVFEAK		PEP_FRAG_1	129	134	b3b4y2y3y4	5	7.7562	7.7562	0.0000	4	7	708.359	15897.0
31117	708.4137	61.4	63.08	41.1103				2761	4344					4645	5045	3688		7057	6654	5106	4441		2997	4251	4528	2510	2306	4281	4692	2782	4643				17	ILGFMK		PEP_FRAG_1	219	224	b3b4y2y3y4y5	6	8.1366	8.1366	0.0000	16	21	708.413	7388.0
31118	708.4114	62.66	63.03	109.276						2345			1613									2110													18	ILGFMK		PEP_FRAG_1	219	224	b3y4y6	3	6.6826	8.1366	0.0000	2	21	708.4109	2559.0
31131	708.3941	60.93	62.24	104.499				22221	18395	19087	18006	18943	16610	10423	9812	10328	16905	14255	16325	20849	18808	19056	19710	18722	19296	19533	17799	16704	17306	17399	15687	15995	16437	17729	6	TAIEFK		PEP_FRAG_1	413	418	b2b3b4b5∞y2y3y3∞y5y6	9	6.5684	6.5684	0.0011	12	12	708.3947	55068.0
31132	709.3535	33.53	32.76	100.625	6760	6453	5717			9400																						11911	11720	12154	28	TQFGEK		PEP_FRAG_1	367	372	b2b2∞b5∞b6b6*y1y3y4y6*	9	6.5641	6.5641	0.0011	4	7	709.3541	9554.0
31135	709.3543	31.53	33.81	101.372				46923	44774	41692	39690	38140	41334	25333	38455	39349	29257	29420	37234	72871	61402	65902	63040	67399	79660	52651	50570	45069	50918	41916	42952				12	GVGDSFK		PEP_FRAG_1	523	529	b7y2y3y5y7	5	7.467	7.467	0.0001	8	12	709.3545	47436.0
31211	710.3381	26.62	25.83	100.115																												2903	2897	3052	30	DVADYK		PEP_FRAG_1	156	161	b4y2y6	3	5.6126	5.711	0.0017	1	3	710.3378	2187.0
31214	710.375	31.85	30.9	40.988																												9482	9121	8133	30	YELTGK		PEP_FRAG_1	76	81	b2y1y2y3y3∞y4y4∞y5y5∞	9	8.1685	8.1685	0.0000	2	10	710.3741	6057.0
31216	710.3754	27.16	26.24	37.8363	27692	29386	28791																									2692			3	LGETYK		PEP_FRAG_1	410	415	y3y5	2	8.2776	8.2776	0.0000	3	3	710.3745	8542.0
31236	710.3768	41.2	40.37	40.2315	9370																											8589	5393	8772	30	TSDFLK		PEP_FRAG_1	270	275	b4y2y3y5	4	7.3895	7.8584	0.0000	2	18	710.3775	6276.0
31257	710.4215	33.37	35.15	42.996																								2058							24	VEPPLR		PEP_FRAG_1	317	322	b4y4	2	7.2894	7.682	0.0000	1	8	710.4215	2058.0
31259	710.4215	43.45	44.99	40.1058				2487	2306		2940	2674	2331																						5	GGALPPAK		PEP_FRAG_1	254	261	y4	1	5.8708	5.8708	0.0016	1	3	710.4224	1467.0
31331	711.3325	29.0	31.59	102.806																				1184											20	ESGYAGK		PEP_FRAG_1	601	607	y3y7	2	6.634	6.634	0.0011	1	2	711.3325	1184.0
31360	710.369	31.39	33.44	103.755				3991	3324						4594	4760	6216	3758	4792	7089	5745	4820	4375	5189	4797	5502	5826	5250	2887	3077		2698	3266	3003	28	YELTGK		PEP_FRAG_1	76	81	b2b3y3y4y6	5	8.1534	8.1685	0.0000	6	10	710.3739	1828.0
31376	711.3856	50.77	50.19	39.177																												5950	8970	5832	29	FNFVGK		PEP_FRAG_1	170	175	b2b3y2y3y4y5y5*	7	6.8009	7.6568	0.0000	2	25	711.386	6556.0
31385	711.4154	43.22	42.48	39.786																												2565	4326	2337	30	GGVHLTK		PEP_FRAG_1	102	108	b5	1	5.7524	6.2505	0.0013	1	7	711.4165	1490.0
31412	711.4901	25.25	24.98	41.157																												1140			28	KPVVIR		PEP_FRAG_1	471	476	y5	1	5.6791	6.1245	0.0015	1	3	711.4901	1140.0
31417	710.4953	59.92	61.53	42.145				2119	2151							1438			1396							2161	2337	2016							23	LPLVLR		PEP_FRAG_1	5	10	y4y5	2	5.6045	5.6045	0.0019	6	7	710.4952	1433.0
31438	710.3747	38.15	39.76	39.982																								10847							24	TSDFLK		PEP_FRAG_1	270	275	b1b1∞b3b4y3y4y4∞y5	8	7.4862	7.8584	0.0000	1	18	710.3747	10847.0
31439	710.3751	40.02	40.02	40.144						31687																									6	TSDFLK		PEP_FRAG_1	270	275	b3b3∞b4y3y4y5	6	7.5398	7.8584	0.0000	1	18	710.3751	31687.0
31455	712.3527	29.66	29.26	102.188									6336																						9	SFTTEK		PEP_FRAG_1	33	38	b3∞b6y2y3y3∞y6	6	5.4542	5.8446	0.0016	1	2	712.3527	6336.0
31459	711.5156	33.63	35.6	39.1846						2683		2203						2368	1573							1667		1651		1840	3835				22	LKPLIK		PEP_FRAG_2	190	195	y4	1	6.0118	6.2483	0.0013	3	6	711.5153	1135.0
31465	711.4144	40.18	42.1	39.7549				1684		2048					2195	2068				2699	1988	2940	1667	1740	2222	2698	1635	1602	1708						20	GGVHLTK		PEP_FRAG_1	102	108	b5	1	6.2505	6.2505	0.0013	4	7	711.4183	1426.0
31466	712.4163	36.01	35.18	106.166																												5070	6195	6766	29	HPALFK		PEP_FRAG_1	226	231	b2b5b6y4y5y6	6	7.9599	8.7609	0.0000	3	23	712.4158	4195.0
31475	712.4378	35.81	34.98	107.346																												4543	4998	5319	28	NPLIAGK		PEP_FRAG_1	112	118	b3b4y7	3	5.6041	6.8193	0.0011	3	6	712.4364	3068.0
31477	712.4185	36.83	35.9	42.2353	44470	50518	51726																												3	HPALFK		PEP_FRAG_1	226	231	b2b3b4b5y2y3y4y5	8	8.4498	8.7609	0.0000	3	23	712.4183	15262.0
31532	712.4042	53.36	53.02	109.45																													4325		29	AFALYK		PEP_FRAG_1	209	214	b2b3y6	3	6.2548	7.5244	0.0001	1	29	712.4042	4325.0
31533	712.4359	39.63	41.74	104.979					4313									3122		3983		4120	2098	2157	2682	2036	2424	2554	1629						25	NPLIAGK		PEP_FRAG_1	112	118	y3	1	6.8193	6.8193	0.0011	1	6	712.4367	1011.0
31544	712.4044	53.53	52.75	109.418	7415	6840	5988																									6351		7372	28	AFALYK		PEP_FRAG_1	209	214	b2b3b4y6	4	6.6621	7.5244	0.0001	5	29	712.4041	4540.0
31557	712.3673	57.53	58.92	105.054				2257	1637	2372										1616		1620													18	GQVYFV		PEP_FRAG_1	285	290	b4b4*	2	5.424	5.424	0.0024	2	2	712.3669	1957.0
31559	712.3828	60.97	60.86	105.371																												4586			28	LGYFGR		PEP_FRAG_1	61	66	b2y3y6	3	4.7443	5.7775	0.0016	1	4	712.3828	4586.0
31580	711.3853	48.0	49.66	39.3318				10241	8507	7238	7294	7003	5510	11462	13907	13261		20941	23754	14104	11858	10718	14372	14905	14399	13464	13680	12677	7637	8888	8621				14	FNFVGK		PEP_FRAG_1	170	175	b2b2*b3y2y3y4y5*	7	7.6568	7.6568	0.0000	22	25	711.3847	11740.0
31625	713.42	28.56	27.76	38.786	3554																														1	VPAGLEK		PEP_FRAG_1	15	21	y5	1	5.5846	7.1084	0.0006	1	5	713.42	3554.0
31633	713.4208	28.4	27.41	38.433		13633	15238																									6686	5385	7185	2	VPAGLEK		PEP_FRAG_1	15	21	y5	1	6.1427	7.1084	0.0006	2	5	713.4217	3780.0
31637	712.4175	31.65	34.14	41.9571				16849	20483		31066	31481						26559	27908	26476			26334	24453		28118	27891	28025	26826	28734	28207				16	HPALFK		PEP_FRAG_1	226	231	b2b3b4y2y3y4y5	7	8.7609	8.7609	0.0000	15	23	712.4181	35385.0
31642	712.4133	32.07	34.0	106.568													2228																		13	HPALFK		PEP_FRAG_1	226	231	b4b6y5y6	4	6.8211	8.7609	0.0000	1	23	712.4133	2228.0
31654	713.4227	37.36	37.36	38.708						2555																									6	IPELNK		PEP_FRAG_1	580	585	y2y3y5	3	6.0722	6.0722	0.0016	1	2	713.4227	2555.0
31690	712.4063	77.08	78.63	108.968				4110	3880		13141	14273	15580	7414	8023	9449	8482	7887	8375	1989			2128		2103	4282	4631	4039							11	AFALYK		PEP_FRAG_1	209	214	b3y3y6	3	6.0446	7.5244	0.0001	3	29	712.406	7939.0
31694	712.4053	50.77	52.38	109.681				7385	6883	6710	6851	5421	6028	3654	4028	4104	6504	4571	5634	7898	7343	6939	7396	6277	6747	8113	6667	8076	6436	6078	5003				16	AFALYK		PEP_FRAG_1	209	214	b2b3b4y2y3y4	6	7.5244	7.5244	0.0001	20	29	712.4063	8436.0
31783	714.3154	34.65	33.97	105.207						10053																						6287	5885	6123	6	DFSSMK		PEP_FRAG_1	149	154	b2b3b3∞b4b5∞y2y3y4y5y6	10	7.8851	8.1261	0.0000	3	21	714.3155	27313.0
31796	714.4525	30.74	30.01	107.531																												5501			28	NAVIVAK		PEP_FRAG_1	170	176	b2b3y2y3y4y7	6	7.0332	7.5175	0.0001	1	6	714.4525	5501.0
31801	714.4275	25.02	24.45	41.064		7685	7623																									3011	2385	3241	3	LQAQVR		PEP_FRAG_1	9	14	y4y5y5*	3	6.833	6.833	0.0011	2	2	714.4275	1903.0
31808	714.4168	33.78	32.73	42.217			1456																												3	TPEVIR		PEP_FRAG_1	91	96	y4	1	5.6517	6.0536	0.0015	1	3	714.4168	1456.0
31814	714.4324	35.06	35.0	40.837																	8144											13822	14467	12944	30	ILHGFK		PEP_FRAG_1	864	869	y3y4y5	3	7.4795	7.4795	0.0001	3	3	714.4319	9753.0
31828	714.4502	39.1	38.29	110.41																												4595			28	AALQALK		PEP_FRAG_1	64	70	b4b5y4*y5	4	6.2098	6.2098	0.0013	1	7	714.4502	4595.0
31842	714.385	41.46	40.52	107.843	5186	6621	4614																									52767	53563	53726	30	GTVYFK		PEP_FRAG_1	277	282	b2b3b3∞b4b5∞y2y3y4y6	9	8.8269	9.2365	0.0000	3	28	714.3843	43357.0
31844	714.451	35.15	37.46	38.5346					4459												3477					3508	2870			3895					5	AALQALK		PEP_FRAG_1	64	70	y5y6	2	5.9153	6.2098	0.0013	2	7	714.4519	2840.0
31858	714.4259	51.14	52.42	106.451						1779		2185		3017	4117																				11	AALNAVR		PEP_FRAG_1	81	87	y6*y7y7*	3	5.4126	5.4126	0.0024	1	2	714.4273	3231.0
31862	714.4507	52.38	53.87	104.199				3523						2268			2801		3956							2712		2703							24	VNQLLK		PEP_FRAG_1	156	161	y2y3y6	3	5.9696	5.9696	0.0015	1	2	714.4536	1790.0
31869	714.3988	48.97	50.52	105.53									2891									3011	1810	1677		1846	1709								20	LPGWGGK		PEP_FRAG_1	35	41	y2y3y7	3	4.7339	4.7864	0.0030	1	4	714.3979	1308.0
31870	714.4531	56.54	57.38	109.974															4709																15	AQGVVLK		PEP_FRAG_1	77	83	b3y1y2y3y7	5	6.1482	6.1665	0.0014	1	5	714.4531	4709.0
31871	714.3146	31.05	33.43	105.556				9620	9286		9055	10263	7045		2971		2558		1938	7883	7071	6869	17959	18784	17699	9384	8619	9051	7288	8397	10292				21	DFSSMK		PEP_FRAG_1	149	154	b2b3b3∞b4b4∞b6y2y3y4y5y6	11	8.1261	8.1261	0.0000	18	21	714.3138	18323.0
31878	713.4935	47.94	49.61	105.681				4719	4858	3930		4088	5031	3027	4051	3908				3293	3158	3198	10698	9968	11433	2139	2351	2209	7380	8130	7359				21	GVVVVIK		PEP_FRAG_1	59	65	b3b4b5y2y3y4y7	7	7.7353	7.7353	0.0000	15	17	713.4941	10594.0
31879	713.494	50.45	50.01	105.062																												4570	4366	5409	28	GVVVVIK		PEP_FRAG_1	59	65	b3b4b5y7	4	6.2746	7.7353	0.0000	2	17	713.493	3062.0
31881	714.4495	57.85	59.94	110.267																1555															16	AQGVVLK		PEP_FRAG_1	77	83	y2y3y7	3	5.9903	6.1665	0.0014	1	5	714.4495	1555.0
31886	714.4518	56.42	57.66	109.4						1141	2802	3029	3473		4826	5065	5473	3696																	9	NAVIVAK		PEP_FRAG_1	170	176	b3b6*y4y7	4	6.0326	7.5175	0.0001	1	6	714.4518	4688.0
31905	714.4613	59.1	60.81	43.3715							5145	5842		6788				15703								10969	11772	11481	9150	9563	9801				26	IMIPLK		PEP_FRAG_1	274	279	y3y4	2	6.9633	6.9633	0.0008	9	12	714.4605	6190.0
31918	714.3491	60.87	61.93	105.167	24707	25590	18037							23451	6178	5786							5555	5382		11866			9293	9596	9795		4579	4985	2	TLYGFGG		PEP_FRAG_1	97	103	b2b4y3y7	4	6.9936	8.9723	0.0000	2	30	714.3476	7569.0
31938	714.4783	59.52	58.97	42.8227	44731	44149	48537																												2	VELLLK		PEP_FRAG_1	256	261	b2b3b4y2y3y4y5	7	8.0459	8.4457	0.0000	3	25	714.4784	13690.0
31956	713.4928	51.9	53.51	110.03				6730	6448	5657	6556	6340	4720		2496	2351	5670	6425	4790	7322	8138	6801	6525	6691	6436	8524	8821	8908	6454	6289	5669				16	AVLVALK		PEP_FRAG_1	639	645	b3b4b5y3y4y5	6	7.4463	7.4463	0.0002	20	23	713.4939	7716.0
31957	713.4932	54.35	53.97	109.604																												5456	7245	6948	28	AVLVALK		PEP_FRAG_1	639	645	b2b4b5y3y7	5	6.9601	7.4463	0.0002	3	23	713.4926	3808.0
31985	715.42	31.11	30.29	39.034																												7894	7750	7101	28	IMPVQK		PEP_FRAG_1	109	114	y4y5	2	7.5658	7.5658	0.0000	3	3	715.4195	6136.0
31987	715.3997	29.05	28.11	37.274	5556	7524	7560																									3068	3369	4009	29	VGISPDK		PEP_FRAG_1	420	426	y3y4	2	6.9185	6.9185	0.0009	5	7	715.3998	2283.0
31990	714.3844	38.06	39.95	108.098				79912	79360	91001	84646	73654	73495	44192	54347	52055	73353	55178	74396	82291	94884	79102	84985	91406	88456	79604	82862	79588	80147	71317	72877				16	GTVYFK		PEP_FRAG_1	277	282	b2b3b3∞b4b5b5∞y1y2y3y4y5	11	9.2365	9.2365	0.0000	24	28	714.3848	112097.0
31996	715.4339	32.27	34.55	106.669																	2273														17	AVLPTSK		PEP_FRAG_1	534	540	b6y7	2	5.3006	6.0952	0.0015	1	3	715.4339	2273.0
31997	715.436	33.79	33.14	39.0432			5621			12652																						23916	23612	20348	28	LVIQDK		PEP_FRAG_1	36	41	b2y2y3y3*y3∞y4y5	7	8.238	8.238	0.0000	4	7	715.4355	19580.0
32002	714.4762	61.59	63.58	108.683																				1062											20	VELLLK		PEP_FRAG_1	256	261	b3y6	2	6.4348	8.4457	0.0000	1	25	714.4762	1062.0
32003	714.454	47.72	47.04	38.201	6360	5781																											32259		29	QGVLGIK		PEP_FRAG_1	179	185	b3b5*b6*y1y3y4y6y7*	8	8.4179	9.0356	0.0000	1	26	714.4547	25719.0
32005	714.4491	44.98	46.37	106.399													2059																		13	NAVIVAK		PEP_FRAG_1	170	176	y4y7*	2	5.8016	7.5175	0.0001	1	6	714.4491	2059.0
32007	715.4355	30.07	32.75	107.112								4574			1905	3300																			12	LVIQDK		PEP_FRAG_1	36	41	y2y3∞y4	3	7.1178	8.238	0.0000	1	7	715.4358	2745.0
32008	715.4356	30.17	32.74	39.0472														6716		1077						10312	5342	6767			10750				27	LVIQDK		PEP_FRAG_1	36	41	y2y3y3∞y4y5	5	7.5258	8.238	0.0000	1	7	715.4337	6449.0
32014	714.4519	69.5	70.6	108.254				1920	1925	2850			3000	3376		4347			1572	2371		3407	2946	3580	3436							3862	4345	3850	12	ALEILR		PEP_FRAG_1	230	235	y5	1	5.6764	5.6764	0.0017	1	2	714.453	3344.0
32028	715.4189	40.28	39.46	41.697																													7608		29	LVGMPAK		PEP_FRAG_1	100	106	b3y1y3y5y6	5	8.0103	8.7239	0.0000	1	27	715.4189	7608.0
32029	715.4195	40.25	39.44	107.926																														7980	30	LVGMPAK		PEP_FRAG_1	100	106	b3y1y3y4y5y6	6	8.3378	8.7239	0.0000	1	27	715.4195	7980.0
32030	715.4206	40.22	39.52	41.493																												7380			28	LVGMPAK		PEP_FRAG_1	100	106	b3y3y5y6	4	7.7285	8.7239	0.0000	1	27	715.4206	7380.0
32043	715.3689	38.79	40.65	95.639																		1467													18	VYTYVA		PEP_FRAG_1	763	768	y4∞y6	2	4.9532	5.9698	0.0015	1	11	715.3689	1467.0
32064	714.4793	56.78	58.51	42.3162				42805	43199		43532	48729		21177	21248	21943		30826	35051				42553			48601	45317	46452	38541	37743	36696				5	VELLLK		PEP_FRAG_1	256	261	b2b3b4y1y2y3y4y5y5∞	9	8.4457	8.4457	0.0000	15	25	714.479	33941.0
32065	714.477	57.29	58.49	111.693						12639			13099				11076			12063	13397	11344		13520	11991										18	VELLLK		PEP_FRAG_1	256	261	b2b3b4b5y1y2y3y4y5y6	10	8.0325	8.4457	0.0000	4	25	714.476	21814.0
32079	715.3941	43.08	44.88	38.8375				2035		3388						1391		2929		1762		2351	1782	1958	1565			1761							6	LGSPWR		PEP_FRAG_2	89	94	y1y4y5y5∞	4	6.7313	6.7313	0.0011	8	10	715.3946	8180.0
32081	715.3731	47.28	48.91	103.053				2258		2645						1686	2280			3118		2746		2142	1793	2657		2602							16	VYTYVA		PEP_FRAG_2	763	768	b2b3b3∞b4	4	5.9698	5.9698	0.0015	7	11	715.3737	2638.0
32090	715.427	50.41	49.77	108.805	6682	8494	5362																									10392	10786	11973	30	VWAAIR		PEP_FRAG_1	272	277	b2b3b4y6	4	6.5799	6.7176	0.0011	1	12	715.4274	8884.0
32091	715.421	36.89	38.8	41.5406				15053	14996										21724		18138							18888							17	LVGMPAK		PEP_FRAG_1	100	106	b3b5b6y1y2y3y4y5y6	9	8.7239	8.7239	0.0000	5	27	715.4213	31365.0
32092	715.4244	37.0	38.93	107.655						5444	17752	17365	9044	5647	8843	9184	16982	25088		24287		8266	18971	18517	17044	20776	19283		17107	17110	16934				16	LVGMPAK		PEP_FRAG_1	100	106	b3b5y2y3y4y5y6	7	8.6186	8.7239	0.0000	17	27	715.4208	31128.0
32136	715.4379	65.67	66.81	107.337				3092	2405						2790												2241		2511			4608	5261	4957	23	GGIEIVK		PEP_FRAG_1	203	209	b4	1	4.6472	4.6472	0.0031	2	2	715.4387	1349.0
32140	714.348	62.99	64.13	105.269	23861	25533	23800	49113	46110	46818	47649	42154	47898	63531	69464	66050	65015	49387	58429	125545	152673	142269	61791	61254	56842	86865	89692	77735	82211	83360	78334	84209	101335	104187	30	TLYGFGG		PEP_FRAG_1	97	103	b2b3b3∞b4b4∞b5∞b6∞b7y2y3y4y5	12	8.9723	8.9723	0.0000	28	30	714.348	85956.0
32155	715.4513	58.45	59.93	39.8341				2286		2306	2215	2375	2424					2842	2088	2424	2882		2253	1996	2153	2783	2167	3114							19	VWIGIK		PEP_FRAG_1	703	708	y3y4y5	3	6.9295	6.9295	0.0009	9	11	715.4516	1618.0
32157	715.4513	60.59	60.43	39.7027																												1785	1924	2076	30	VWIGIK		PEP_FRAG_1	703	708	y5	1	6.3757	6.9295	0.0009	2	11	715.4507	1303.0
32160	715.4466	38.06	39.62	107.914				31927	31710	29619			36980	3675	8315	5906	21919	24117	27072	35040	31481	28391	31075	32102	29638	31846	31247	35063	25839	23960	24431	2779	2606	2758	4	SIVQLR		PEP_FRAG_1	639	644	b2b3y1y3y3*y4y4*y6*	8	7.0217	7.0217	0.0006	3	3	715.4484	25308.0
32161	715.4084	46.04	47.77	104.056				4916	3701	4473	4559			3455	4916	4702		3704	5790		5225	5884	5311	5158	5448		4400	4693	3623	3359	3260				18	AVADAIR		PEP_FRAG_1	43	49	b3b5y5y7	4	6.9406	8.1599	0.0000	1	7	715.4074	9636.0
32165	715.4366	42.14	41.32	103.86	22323	23690																										54777	55927	57727	28	GEIIGVK		PEP_FRAG_1	133	139	b2b3b5b6y1y2y3y4y5y6∞	10	8.805	9.5068	0.0000	5	29	715.4367	45548.0
32166	715.4367	39.0	40.85	104.284				83598	86135	73586	104311	110243	71090	90444	87905	83764	53028	83716	102571	81081	90965	83782	107797	106812	97516	87832	89283	98730	101294	96842	102103				21	GEIIGVK		PEP_FRAG_1	133	139	b2b3b4b5b5∞b6y1y2y3y4y5y6∞	12	9.5068	9.5068	0.0000	22	29	715.4371	106032.0
32167	715.4366	42.25	41.57	38.624			5422																												3	GEIIGVK		PEP_FRAG_1	133	139	y3y4y5	3	7.216	9.5068	0.0000	1	29	715.4366	5422.0
32182	716.376	32.57	31.77	38.4693																												6729	7241	7429	30	GIDFHK		PEP_FRAG_1	56	61	y2y3y4	3	6.7919	6.7919	0.0011	2	2	716.3758	5385.0
32187	716.3585	25.8	28.29	100.305						3563										1791	4105		2170	2491	2099	1729									21	AQVSPQS		PEP_FRAG_1	898	904	y3∞y7y7*	3	5.4436	5.4436	0.0020	1	2	716.3564	1717.0
32200	716.4323	34.34	33.43	107.802	34907	35270	32653																									48208	48330	57822	28	NLGTIAK		PEP_FRAG_1	162	168	b2b3b4b4∞b5b5∞b6*b6∞b7b7*y2y3y4y5y5∞y6y7y7*	18	9.066	9.066	0.0000	5	7	716.4323	40754.0
32203	716.3968	38.33	37.54	103.409									4009																			4558	3632	4042	29	DAEILR		PEP_FRAG_1	190	195	b3y2y5y6	4	6.4908	6.6883	0.0011	2	12	716.3974	2311.0
32210	715.4116	39.6	38.61	106.927	12869	11531	10850																									61476	62247	61138	29	DIQLAR		PEP_FRAG_1	124	129	b2b3b4b5b6y1y2y3y4y4*y5y6*	12	7.9919	7.9919	0.0000	4	23	715.4125	50352.0
32221	715.3647	34.53	36.08	99.0401	27765	23750	25136	27365	27196		40412	38216	36355	12390	13955	13441	14880	14032	23544	29284	23268	22039	42154	41262	39332	52908	56913	62114	25245	22663	23832	19832	12388	21908	20	GPEDVAK		PEP_FRAG_1	104	110	b3b4b4∞b5∞b6b7y3y4	8	7.1814	7.1814	0.0006	18	19	715.3649	44399.0
32230	716.3916	49.17	50.38	105.002																	1053														17	DLDVVR		PEP_FRAG_1	186	191	y3	1	5.4035	6.3005	0.0013	1	12	716.3916	1053.0
32244	715.4112	29.69	31.5	102.755	4113	4653		25990	22785	28499	15395	16139	18192	11835	15790	17181	13288	12615	20870	30380	29114	27322	29509	36776	34336	21123	21098	24075	18736	20715	24525	21827	23037	24227	29	AVADAIR		PEP_FRAG_1	43	49	b4b4∞b5y1y3y4y5	7	8.1599	8.1599	0.0000	3	7	715.4121	18406.0
32252	716.4329	38.52	40.37	41.951					2647									2790	4321		4114														14	LSVLER		PEP_FRAG_1	400	405	y3∞y5	2	5.271	6.1043	0.0015	1	4	716.4356	1366.0
32260	716.4311	59.54	60.65	109.208						2505																	1654	1772							23	DTVLLR		PEP_FRAG_1	660	665	y1y4y6	3	5.462	6.2869	0.0013	1	3	716.4341	1018.0
32278	715.4735	71.95	73.24	111.858				2654	2415	3241	2188	2133	3228		1481	1749	2013		2914	2149	3313	3164	2824	2623	2615	2170	2245		1605	1646		3699	3227	3868	17	TGLALIK		PEP_FRAG_1	187	193	b3b4b5y2y3y4y7	7	6.1546	6.1546	0.0016	2	2	715.4714	4557.0
32279	716.3956	34.73	36.89	103.787				6820	7002		8644	8300	5508		7743	7347	6223	5365		8176			6353	6768	6519	8712	8390	8139	4632	4794	4966				19	DAEILR		PEP_FRAG_1	190	195	b3b4y5y6	4	6.6883	6.6883	0.0011	7	12	716.3957	5722.0
32287	716.4303	86.52	86.85	106.838									3986						3370		2014	2504													17	DTVLLR		PEP_FRAG_1	660	665	y1y3y6	3	6.2869	6.2869	0.0013	1	3	716.4303	2104.0
32292	716.3967	41.1	42.57	40.5564	32597	29848	33122	2847	2604					5377	5224	5434				5172	5273	4890				5006	4871	4805	2808	2453	2754				5	LLEDAR		PEP_FRAG_1	1165	1170	y4	1	5.8097	5.8097	0.0016	2	3	716.3968	1658.0
32293	716.4048	41.5	42.56	106.891																	6686		8641						6752	5813		6420		6895	25	MLPDLK		PEP_FRAG_1	1003	1008	b6y4	2	5.6174	5.6174	0.0019	1	3	716.4054	4422.0
32294	716.4712	66.03	66.03	110.038						2637																									6	LVPFLK		PEP_FRAG_1	241	246	y1y4y6	3	7.0191	7.0191	0.0007	1	21	716.4712	2637.0
32298	716.4719	67.14	67.17	110.138																														1471	30	LVPFLK		PEP_FRAG_1	241	246	y2y4y6	3	6.9425	7.0191	0.0007	1	21	716.4719	1471.0
32310	716.4552	69.23	70.28	107.849				1781	1637	2958									1580	1433	2868		1422	1464									1766	2297	19	LTELLK		PEP_FRAG_1	467	472	b3b3∞y3y6	4	5.9987	7.6657	0.0000	5	12	716.4554	1057.0
32314	717.3804	25.94	25.42	102.023						854																						4342	4478	4379	30	GGLVDEK		PEP_FRAG_1	273	279	b3	1	5.246	5.246	0.0026	1	2	717.3798	3198.0
32347	717.4155	33.25	32.41	38.545																												4940	8362	8065	29	SGELLAK		PEP_FRAG_1	31	37	b3b4y3y4y5y6	6	7.1499	7.1499	0.0006	2	2	717.4157	6077.0
32352	717.3803	35.31	35.31	102.796						96972																									6	DGDILGK		PEP_FRAG_1	93	99	b3b3∞b4b4∞b5b7∞y2y3y4y5	10	8.1057	9.0165	0.0000	1	30	717.3803	96972.0
32360	716.4561	52.69	52.05	107.942	5918	5432	5055																									10782	12898	13432	29	EILTLK		PEP_FRAG_1	289	294	b2b4b4∞b6y3y4y6	7	8.0339	8.0339	0.0000	1	6	716.4571	9822.0
32373	717.407	38.63	40.82	41.634							1065																								7	SVWVAR		PEP_FRAG_1	38	43	y4	1	6.5706	6.5706	0.0011	1	4	717.407	1065.0
32376	715.4408	34.16	36.57	39.707							11810																								7	AVLGEVK		PEP_FRAG_1	202	208	b2y2y4y5	4	7.5113	9.1856	0.0000	1	27	715.4408	11810.0
32378	716.4732	65.13	66.62	42.3457				2605	2003										2801	3486															5	LVPFLK		PEP_FRAG_1	370	375	y4	1	6.7415	7.0191	0.0007	4	21	716.4739	1280.0
32379	716.4707	65.24	66.71	111.051						2637	3723	3316			1867		2020	3234			2290	2285	3755	3330	1918		1780								19	LVPFLK		PEP_FRAG_1	241	246	b3y4	2	6.8811	7.0191	0.0007	11	21	716.4718	2727.0
32380	717.3805	36.66	35.78	103.097	58006	56949	53074																									18960	22764	20276	28	DGDILGK		PEP_FRAG_1	93	99	b3b4b5b6b7∞y2y3y4y5y6y7	11	8.5656	9.0165	0.0000	6	30	717.3797	15096.0
32395	717.4347	44.54	43.6	110.981																												8433	9144	9355	30	AVVLMGK		PEP_FRAG_1	51	57	b2b3b4y2y3y4y5	7	7.7576	7.9904	0.0000	3	27	717.4345	6758.0
32396	717.395	48.42	47.75	104.134																												2359	2621	2785	29	DVAWVK		PEP_FRAG_1	145	150	b3b4y6	3	5.9942	6.679	0.0011	2	9	717.3954	1691.0
32401	716.422	43.97	45.27	41.0614	19301	20385	15921	51703	48806		47932	48044		36157	41577	37807		37286	44083	48417	49514	48521	50939	50225	46147	43639	45360	40082	34342	37264	35420	36968	39106	41403	28	IDDLIK		PEP_FRAG_1	527	532	b2b3b4b5y2y3y4y5	8	8.8828	8.8828	0.0000	25	27	716.4215	30402.0
32402	716.4191	44.93	45.29	106.401						17209			23231				23287																		6	IDDLIK		PEP_FRAG_1	527	532	b2b3∞b4b4∞y2y3y4y5y6	9	8.1279	8.8828	0.0000	1	27	716.4209	50969.0
32405	717.394	45.23	47.02	105.096								3367						2894	3369			5359							3565	3206	2878				15	DVAWVK		PEP_FRAG_1	145	150	b3y3y4y6	4	5.9343	6.679	0.0011	2	9	717.3957	2688.0
32416	716.4287	41.49	43.56	40.349				1563							1601	1888		2089		1658		1848	1547			1783	1788								22	LSVLER		PEP_FRAG_1	400	405	y3y5	2	6.0974	6.1043	0.0015	2	4	716.4325	1163.0
32425	717.3974	55.61	55.27	104.55																												5168	6215	5753	30	GLDWVK		PEP_FRAG_1	80	85	b3y6	2	6.5402	7.8533	0.0000	2	20	717.3971	3786.0
32438	717.4155	35.86	37.92	39.5026					2058		3794	3236	3488							3478			3185	3078	3444	6710	6316	6852	3030	2580	2630				24	QISELK		PEP_FRAG_1	1578	1583	y3y4	2	6.4006	6.4006	0.0013	2	2	717.416	5427.0
32446	717.3621	38.94	40.26	102.444	13746	12112	10642	14362	11921	14233	14883	16791	15394	7501	7994	8130	10818	10828	13665	21242	23032	20028	20945	20830	18426	35235	38969	38954	26321	25253	25825	21239	23050	24044	25	IDPNMK		PEP_FRAG_1	430	435	b3b5y4y6*	4	5.9503	5.9503	0.0015	2	2	717.3629	17985.0
32459	717.3727	40.73	42.43	102.961					8355	9895	11274	12376	10368				22305	21325	19856		6069		9461	8083	7957	15345	13858	14136			5057				22	DAWAVR		PEP_FRAG_1	257	262	b3b4b6y4y5y6	6	7.089	7.464	0.0001	8	9	717.3732	12819.0
32465	717.3804	32.52	34.82	103.296				30909	31569		34796	34064	41309	14620	20150	20483	64122	57947	73057	39292	37387	38393	30969	29450	30557	47632	49020	54916	64716	55661	56191				27	DGDILGK		PEP_FRAG_1	93	99	b3b4b5b6b6∞y1y2y3y4y5y6	11	9.0165	9.0165	0.0000	23	30	717.38	37659.0
32467	716.4583	46.74	48.01	40.9029	17394	18543	16806	10980	9601		10493	9204		11187	12750	13060		34088	35234	15883	14655	14527	13404	12444	11709	19774	21031	20694	10890	11144	10409	9712	9368	10028	21	LTELLK		PEP_FRAG_1	467	472	b3b4y3y5	4	7.6657	7.6657	0.0000	3	12	716.4578	10984.0
32468	716.4553	47.63	47.99	109.752						2862			4507				14685																		6	LTELLK		PEP_FRAG_1	467	472	b2∞b3b3∞b6y3y6	6	6.5661	7.6657	0.0000	2	12	716.457	6153.0
32472	717.4346	41.34	43.12	111.662				14308	11204	12000	8899	8921	8261	7429	8466	8746	4489	3941	4202	5869	5147	5133	10860	11309	10139	8934	8280	9846	6502	5879	6202				20	AVVLMGK		PEP_FRAG_1	51	57	b2b3b4y2y3y4y5y7	8	7.9904	7.9904	0.0000	24	27	717.4359	11278.0
32473	717.4184	47.14	48.78	109.673				5188	5246	5233	3770	3733	4051	4213	4647		6046	5854	7917	4868	5718	5029	6234	6813	6429	5180	4989	5303	4881	5105					6	ETLINK		PEP_FRAG_1	208	213	b3b4y2y3y6	5	7.6878	7.6878	0.0000	8	8	717.4184	14547.0
32478	717.3696	34.83	36.55	97.9173				16149	18669	23910	21407	21150	16654	16391	27698	27961	12863	14959	10811	29492	18656	15590	20072	20667	20494	21286	20097	20475	22166	22377	22577	12869	10819	11921	9	DAWAVR		PEP_FRAG_1	257	262	b6y3y6	3	7.464	7.464	0.0001	1	9	717.3687	19481.0
32510	717.4141	62.6	64.25	105.688					1853						2844	2388			1487		2916		4293	4530	4495				4617	4464	3370				17	LLGSQLS		PEP_FRAG_1	595	601	b6y7y7*	3	5.6461	5.6461	0.0022	1	6	717.4154	3895.0
32543	718.355	30.66	29.98	38.963	1700																														1	SPWSNK		PEP_FRAG_1	73	78	y1y4y5	3	6.3114	6.4431	0.0013	1	3	718.355	1700.0
32544	718.3578	30.83	30.19	38.81			1403																												3	SPWSNK		PEP_FRAG_1	73	78	y4	1	5.2665	6.4431	0.0013	1	3	718.3578	1403.0
32546	718.3711	30.2	32.9	101.495												1776																			12	GGMAINR		PEP_FRAG_1	294	300	y4*	1	5.4029	5.941	0.0016	1	3	718.3711	1776.0
32552	718.394	32.46	34.99	108.142								8197																							8	VLAEMR		PEP_FRAG_1	273	278	b4y2y4	3	7.1806	7.1806	0.0006	1	2	718.394	8197.0
32556	718.3676	36.25	35.57	102.596																													2723		29	AEIEEK		PEP_FRAG_1	344	349	y3y3∞y4y6	4	6.2294	6.4813	0.0011	1	2	718.3676	2723.0
32558	718.4007	37.73	36.33	38.081		2454																													2	LDLTEK		PEP_FRAG_1	76	81	y3y5	2	6.693	6.693	0.0011	1	2	718.4007	2454.0
32560	718.3994	37.69	36.66	38.583	1487																														1	LDLTEK		PEP_FRAG_1	76	81	y4y5	2	6.5064	6.693	0.0011	1	2	718.3994	1487.0
32567	718.3736	34.55	36.76	101.088																			3840	3641				2575	4387	3172					26	GGMAINR		PEP_FRAG_1	294	300	y4*y7	2	5.4485	5.941	0.0016	1	3	718.3727	1816.0
32592	718.3683	35.36	37.34	100.724																	12992														17	GGMAINR		PEP_FRAG_1	294	300	b5y4	2	5.941	5.941	0.0016	1	3	718.3683	12992.0
32596	718.4298	47.87	47.31	41.53																														2307	30	LLMVSR		PEP_FRAG_1	418	423	y4y5	2	6.8609	7.3057	0.0005	1	9	718.4298	2307.0
32597	718.4287	47.92	47.26	41.619																													4980		29	LLMVSR		PEP_FRAG_1	418	423	y4y5	2	7.3057	7.3057	0.0005	1	9	718.4287	4980.0
32599	718.3907	47.11	48.44	41.294													5449																		13	SIETLR		PEP_FRAG_1	325	330	b4∞y3∞	2	5.3862	8.038	0.0000	1	8	718.3907	5449.0
32602	718.4263	49.76	48.83	41.8227	6579	11121	8889																												1	VTFPVR		PEP_FRAG_1	96	101	y3y4y5	3	7.4745	7.4745	0.0001	2	5	718.4263	1619.0
32605	718.3971	41.84	43.65	103.17						4396	2945	3201		3105	4014	4217	3281	2309	4441	4918						4351	4354	4526	3966	3660	4028				22	ETEIVK		PEP_FRAG_1	653	658	b3y6	2	5.2495	5.2495	0.0022	3	3	718.3991	2837.0
32629	717.4513	44.23	45.77	109.946				8253	7558	7603	6665	6697	6042	7606	8748	9083	8964	7581	10052	7499	7255	6671	9136	8620	7635	7069	7744	7584	7825	7243	8253	8266		7852	20	AATILTK		PEP_FRAG_1	489	495	b3b4b5y2y3y7	6	6.3608	6.3608	0.0013	9	9	717.4517	8266.0
32633	718.4243	46.76	48.44	109.585				4309	3631		5963	5176	9138		7228	7444		4219	4129	4973	3410	3703		4828		5417									12	VTFPVR		PEP_FRAG_1	96	101	y4y5	2	7.443	7.4745	0.0001	1	5	718.4273	6962.0
32634	718.4256	47.01	48.47	41.465										1361																					10	VTFPVR		PEP_FRAG_1	96	101	y3y4y5	3	7.0919	7.4745	0.0001	1	5	718.4256	1361.0
32649	718.43	44.69	46.6	41.4688				6108			2533	4723			2132	2314				3594	3194					3170	5122	5449	2830	2442					24	LLMVSR		PEP_FRAG_1	418	423	y4y5	2	6.7698	7.3057	0.0005	3	9	718.4309	3964.0
32650	718.4279	45.05	46.64	108.65					2552	3356				3788			1794		1665				5384	5439	5489						5236				21	LLMVSR		PEP_FRAG_1	418	423	y3y4y5	3	7.0863	7.3057	0.0005	2	9	718.4273	4693.0
32673	718.4284	48.95	50.31	109.175				3975	4018	2601		3606					2238	3270	3807	3929		2239		2719	1638	3577	2347		1672	3113	3262	2590	2796	2963	16	LVMSIR		PEP_FRAG_1	606	611	y4y4∞y5	3	7.0049	7.0049	0.0007	9	9	718.4276	3487.0
32695	718.3384	57.82	59.02	98.6297	5892		5958	5542	3432	3986	3473	5407	5445	3070	3841	3235	2361	2280	3476	5534	5058	5815	5455	6501	5602	2364	2712	4210	4894	4713	3494	3510	4657	3877	29	DDALER		PEP_FRAG_1	710	715	b6y3	2	5.7392	5.7392	0.0017	2	2	718.3371	3001.0
32709	718.4503	46.29	47.78	42.326																								1018							24	LYVPVK		PEP_FRAG_1	86	91	y3	1	5.7447	5.7447	0.0016	1	4	718.4503	1018.0
32710	718.4493	46.32	47.69	42.76															1328																15	LYVPVK		PEP_FRAG_1	86	91	y3	1	5.7033	5.7447	0.0016	1	4	718.4493	1328.0
32714	718.4506	55.97	55.64	114.498																												1545	2076	2193	30	FLTPLK		PEP_FRAG_1	660	665	y3y6	2	6.591	6.591	0.0011	3	16	718.4505	1380.0
32718	718.4605	61.62	61.62	110.796						1610																									6	LAVIFR		PEP_FRAG_1	615	620	b3	1	5.3482	6.3844	0.0013	1	4	718.4605	1610.0
32728	718.451	53.53	54.97	114.874						2364			2781		1635					1825	2242	1723	1870	2054	1653		1656	1560							21	FLTPLK		PEP_FRAG_1	660	665	y3	1	6.5905	6.591	0.0011	10	16	718.4509	1227.0
32733	718.4602	63.61	63.99	108.591						4577			2989									1717													18	LAFVIR		PEP_FRAG_1	89	94	b3y6	2	5.7403	8.3721	0.0000	1	15	718.4583	2080.0
32734	718.4626	64.55	64.37	108.231																												3027	3402	7564	30	LAFVIR		PEP_FRAG_1	89	94	y4y5	2	7.2707	8.3721	0.0000	1	15	718.4617	5255.0
32736	719.3211	34.64	36.42	38.701													1814																		13	ICSPDK	Carbamidomethyl C(2)	PEP_FRAG_1	567	572	y3y6	2	5.4186	5.4186	0.0020	1	2	719.3211	1814.0
32746	719.3798	26.82	25.97	41.541																												12390	13211	11495	30	VMGEVGK		PEP_FRAG_1	390	396	b4b6y2y3y4∞y5y6	7	8.2078	8.2078	0.0000	3	3	719.38	9672.0
32760	719.3763	32.58	35.1	38.6058				2220												3332			2395	4855		1749									22	ELMAQK		PEP_FRAG_1	967	972	y4	1	6.1772	6.1772	0.0014	1	2	719.3777	1192.0
32766	719.3766	41.38	40.63	103.033																												4322	4791	4652	30	DMINVK		PEP_FRAG_1	554	559	b2y3y6	3	6.6912	6.6912	0.0011	2	7	719.3765	2963.0
32781	719.3729	55.67	56.94	95.833																		1049													18	DMINVK		PEP_FRAG_1	554	559	y3y6	2	6.2232	6.6912	0.0011	1	7	719.3729	1049.0
32805	719.3938	35.0	36.7	108.514													1245																		13	GDSLSLK		PEP_FRAG_1	896	902	b4y3y7	3	5.5014	5.5014	0.0020	1	2	719.3938	1245.0
32807	719.4125	35.34	34.37	40.655	1379																														1	MVAASIK		PEP_FRAG_1	311	317	y5	1	5.439	7.1916	0.0006	1	7	719.4125	1379.0
32810	719.4163	35.36	34.49	40.24		1309																													2	MVAASIK		PEP_FRAG_1	311	317	y5	1	6.1896	7.1916	0.0006	1	7	719.4163	1309.0
32821	719.3559	34.3	36.49	38.3785					3639		4920	4402	2749		6138	5812		3029		4569	3731	3092	7291	6807	6445	5806	5452	5554	3903	3875	6344				23	EGLDSAK		PEP_FRAG_1	361	367	y4∞	1	5.2066	6.9033	0.0009	1	6	719.3588	3660.0
32831	719.4105	45.08	46.49	38.0912						2634		2617				2702		3020			3289														12	TTWAIK		PEP_FRAG_1	435	440	y4	1	5.5299	5.5299	0.0020	3	5	719.4111	2061.0
32840	719.3946	36.93	38.87	104.995				6045	5564	5331	29790	28962	33849	9276	12401	12936	10368	9423		3802	3815		3212	3173	2764	5638	5803	5695	2133	2335	2091				14	GDSLSLK		PEP_FRAG_1	896	902	b5b5∞y7	3	4.9875	5.5014	0.0020	1	2	719.3957	4959.0
32844	719.3725	44.08	45.34	102.865	8622	7067	7233	2458	2443	3749	3205	2607	4168		2817	2653		4476	4868	5500	4947	4589	4630	4868			5287	4224							6	DLWASK		PEP_FRAG_1	463	468	b3y3y4y5y6	5	6.8775	6.8775	0.0010	10	11	719.3742	9522.0
32846	719.4099	35.2	37.25	39.0212				6238	6944	9166	5912	5346	4546	2941	4896	4606		4111	4669	6965	5013	5363	6126	5967	6068	6730	6556	6164	6384	6134	6052				17	SPFLQK		PEP_FRAG_1	283	288	b1b1∞b2∞y1y3y3*y4y5	8	7.3892	7.3892	0.0003	14	15	719.4096	7040.0
32855	719.338	49.56	50.76	101.711	51759	48572	49063	41654	36432	37068	59233	52966	28548	4399	5939	5247	36313	39648	42939	20471	20143	19099	23137	21179	20408	50872	51243	52877	30019	31382	27864	12082	13204	13212	11	ICSPDK	Carbamidomethyl C(2)	PEP_FRAG_1	567	572	b2y5	2	4.7763	5.4186	0.0020	1	2	719.3393	5330.0
32859	719.4462	53.68	53.26	39.007																												1909	1952	3043	28	IAAGIFK		PEP_FRAG_1	149	155	y6	1	5.5692	5.9122	0.0016	1	5	719.4452	1275.0
32868	719.41	54.66	56.22	39.4038				1707				2412						3593	3828																8	WSLSVK		PEP_FRAG_1	197	202	y5	1	5.871	5.871	0.0016	2	4	719.4105	1426.0
32870	719.4444	51.41	52.76	39.0139						2217			1656							1658	1925		1710	1630	2234			1626							17	IAAGIFK		PEP_FRAG_1	149	155	y5y6	2	5.9122	5.9122	0.0016	4	5	719.4449	2261.0
32874	719.4134	36.55	38.51	109.788				8509	7676	6530	9125	8949	6726			4966	7384	7028		16173		10656	15140	14491	11898	19072	18540	16467	14755	15017	12715				16	ALMTVGK		PEP_FRAG_1	32	38	b2b3b4b4∞b5∞y2y3y4y5y7	10	7.9429	8.0119	0.0000	15	18	719.4146	20313.0
32875	719.4099	39.25	38.33	39.0137																												4832	5726	5075	29	SPFLQK		PEP_FRAG_1	283	288	y3y4	2	6.5022	7.3892	0.0003	1	15	719.4126	3806.0
32876	719.4138	39.97	39.06	109.277																												12079	11209	11787	29	ALMTVGK		PEP_FRAG_1	32	38	b2b3b4b4∞b5∞y2y3y4y5	9	8.0119	8.0119	0.0000	3	18	719.4145	8310.0
32881	719.447	65.19	66.51	111.292				7448	5676	5084	4458	3419	3797		1765	1663	10048	8841	9111	5445	4897	4826	4825	4598	4344	6084	5619	5150	4075	3880	4071	5517	6681	6805	15	GLAAFLK		PEP_FRAG_1	742	748	b2b3b4b5b7y2y3y4y7	9	7.5711	7.5711	0.0000	18	18	719.446	8293.0
32938	720.4298	41.09	40.3	113.299																												2568	3020	7006	28	LISPYK		PEP_FRAG_1	359	364	y3y4y6	3	7.1528	7.3594	0.0004	3	23	720.4293	1707.0
32941	720.4057	42.01	41.17	104.197	168552	180386	183023																									242408	227345	252690	29	NVNVFK		PEP_FRAG_1	114	119	b2b2*b3b3*b4b4*b5b5*b6b6*y1y2y3y4y4*y5y6*	17	9.0499	9.2867	0.0000	6	30	720.4057	190466.0
32943	720.3369	29.79	31.79	103.162				9960	23267	36978	16962	20203	3742	6051	29762	38782	55569	38485	10084	17882	5522	2150	4905	6773	6930	33989	30702	30092	7115	12288	26887	18652	18620	19149	28	GMDIER		PEP_FRAG_1	350	355	b3y1y3y4	4	8.48	8.48	0.0000	25	26	720.3379	15184.0
32954	720.4079	46.3	45.7	41.871																												2470			28	TSLMIR		PEP_FRAG_1	257	262	y4y5∞	2	5.5504	6.3226	0.0013	1	5	720.4079	2470.0
32956	720.4103	46.3	45.62	108.314																														2793	30	TSLMIR		PEP_FRAG_1	257	262	b6y5	2	5.8149	6.3226	0.0013	1	5	720.4103	2793.0
32985	720.4064	57.65	57.3	41.887																												10157	9909	9625	28	IFDLGR		PEP_FRAG_1	33	38	b6y3y4y5	4	7.1058	7.6261	0.0000	2	24	720.4043	7812.0
32986	720.4435	57.09	58.01	40.297																	1276														17	ALFTLR		PEP_FRAG_1	27	32	y4∞	1	5.0835	6.0199	0.0015	1	7	720.4435	1276.0
32988	720.3872	42.84	44.8	106.107				2344	2207		2228	2375			2706		2279					2861	4365	4304	3869	2368	2412	2296	2369	2049	2075				20	SFLPEK		PEP_FRAG_2	1243	1248	y3y6	2	5.9812	5.9812	0.0015	14	17	720.3853	3657.0
33003	720.4085	46.69	48.58	41.2362				3858	4499		2566	3020			2252	2142			1933	2121	2734		2536	3035		1921	2265		2074	2058					20	FAVLDR		PEP_FRAG_1	426	431	b6y4y5	3	6.3552	6.8944	0.0010	9	13	720.4062	2399.0
33019	720.4047	38.51	40.38	104.473				241582	232694	223813	226332	241512	253621	179951	228703	239323	224448	193842	273878	237712	277017	240242	285718	273745	271157	241732	253825	257827	241793	224841	234605				11	NVNVFK		PEP_FRAG_1	114	119	b2b2*b3b3*b4b4*b5b5*y1y2y3y4y4*y5y5*y6*	16	9.2867	9.2867	0.0000	24	30	720.4051	302331.0
33032	720.4049	47.72	49.37	111.641				7557	7214	7226	7049	6842	5801	4464	4921	4953	5661	5813	6255	10537	12202	11832	8523	8412	9192	8884	6479	8955	7459	7535	6777				8	IDIFGR		PEP_FRAG_1	82	87	b3y3	2	5.9929	6.4751	0.0012	2	6	720.405	4088.0
33033	720.4066	49.68	49.04	41.2827																												3116	3559	2967	30	FAVLDR		PEP_FRAG_1	426	431	y1y3y4y5	4	6.8944	6.8944	0.0010	2	13	720.4048	1888.0
33041	720.399	45.66	46.57	41.3062	22540	20691	14449	15380	15715		15301	16934		7293	4581			18629			9442		20538					25689		19754		13798	14981	15533	4	TLDMIK		PEP_FRAG_1	468	473	b3b4y2y3y4	5	8.4969	8.5663	0.0000	14	27	720.3985	11656.0
33043	720.3968	44.89	46.5	107.836						5546			8504			5212	11171			19668		7558		19647	18436	26902	27718		20499		22687				21	TLDMIK		PEP_FRAG_1	468	473	b2∞b3b4y2y3y4	6	8.5663	8.5663	0.0000	10	27	720.3971	17926.0
33045	720.4307	57.01	58.65	109.515				5188	5333	5087	4760	5835		2484		2688	4617	3923		6063	6151		7775	7327	7994	10577	10956	9987	6635	5311	5408				21	DFVLVK		PEP_FRAG_1	287	292	b2b3b4y2y3y6	6	7.3332	7.3332	0.0004	13	15	720.4302	6820.0
33046	720.43	59.25	59.03	108.804																												4793	4927	5502	30	DFVLVK		PEP_FRAG_1	287	292	b2b3b4y3	4	6.9775	7.3332	0.0004	2	15	720.4304	3572.0
33053	720.362	52.26	53.49	104.034	9356	7129		83184	77579	74733	63855	64954	65024	71458	73890	78488	57600	47331	54376	84159	83164	79456	82693	88571	78592	88171	82816	75963	77499	71724	72351	56038	60571	55745	20	MAELEK		PEP_FRAG_1	350	355	b5y1y5	3	6.1451	6.1451	0.0014	4	5	720.3628	90602.0
33072	720.4049	42.73	44.24	40.4998	10923	11108	8940	13961	15646	10812	11709	17253		6330	6738	7411		6180	6737	6610	6783	6279	8034	8878	10446	8937	10593	9420	6700	5894	6374				6	FLEGVR		PEP_FRAG_1	215	220	y3y4y5	3	8.0144	8.0144	0.0000	22	25	720.4059	31628.0
33083	721.4015	31.11	30.29	107.963																												25167	25491	29275	30	AYLAQR		PEP_FRAG_1	59	64	b2b3y2y3y3*y4y5	7	7.6866	7.6866	0.0000	3	3	721.402	24282.0
33094	721.3898	32.79	35.25	103.704							1845	2021			2759	2766																			12	AEFLNK		PEP_FRAG_1	650	655	b3y2y3y6y6*	5	6.2116	6.2116	0.0013	1	2	721.3889	2278.0
33141	721.4268	47.05	46.19	42.3314	12276	12931	11653																										43455	43485	30	QSFVLK		PEP_FRAG_1	100	105	b2b3b3∞b4b4*b4∞b5∞b6y2y3y4y5y6*	13	8.2525	8.5092	0.0000	2	25	721.427	34712.0
33142	721.4271	46.85	46.27	108.609																												11862			28	QSFVLK		PEP_FRAG_1	100	105	b2b3b3∞b4b4*b4∞b6y2y3y4y6	11	8.1355	8.5092	0.0000	1	25	721.4271	11862.0
33151	721.4244	54.02	53.59	40.017																												6642	4906	6980	30	LFNLSK		PEP_FRAG_1	144	149	b3y2∞y4y5	4	6.9815	8.1043	0.0000	1	17	721.4232	4778.0
33154	721.4243	50.05	51.19	108.121				1848	1693	2619			1750											1571											6	NALYIK		PEP_FRAG_1	308	313	b2b4b4*b5y1y2y3	7	7.5024	7.7633	0.0000	1	17	721.4237	5124.0
33165	721.3734	41.22	42.99	101.285				7471	8159		7312	7182	7828	8698	10226	9586	6904			7977		6576	6592	6395	6244	8110	8139	7693	8387	8042	7307		5687		11	SNITSLS		PEP_FRAG_1	564	570	b2b3b4*b4∞b5b5∞b6b7	8	7.1234	7.1234	0.0006	21	24	721.3743	10521.0
33166	721.3723	43.54	42.63	101.079																												3482			28	SNITSLS		PEP_FRAG_1	564	570	b3b4b5∞	3	6.2221	7.1234	0.0006	1	24	721.3723	3482.0
33169	721.3494	27.85	29.89	101.87				4099	4218	7312	3389	3149	5902	3502	4276	4666	3346	2428	7514	6339	7888	8459	6310	5852	8119	5920	5531	6870	2889	3672	4017	5355	5045	5936	23	GDFPTGK		PEP_FRAG_1	552	558	y5y7	2	5.3312	5.3312	0.0021	4	4	721.3504	3621.0
33172	721.3659	35.54	37.64	107.357				4060	4054	4678	3661	3740		2794	3892	4175	5281	5707	8941	5909	6884	6743	3741	4125	3668	5674	5690	5150	4240	3421	3710				20	SFPQSR		PEP_FRAG_1	121	126	y4∞y6	2	6.137	6.137	0.0015	6	6	721.3671	3570.0
33173	721.4249	35.82	34.92	42.0908		8953	6233																									4006	4119	5088	2	VQLYAK		PEP_FRAG_1	117	122	y4y5*	2	6.1468	7.4364	0.0002	1	16	721.4272	2134.0
33175	721.4234	32.01	34.53	41.9288				7102	6333		8268	7923			9272	9097		6581	4307	5879	6302		7166	7251	7731	5728	7456	6769	6391	6533	6430				11	VQLYAK		PEP_FRAG_2	117	122	b3y1y2y3y4y5	6	7.4364	7.4364	0.0002	11	16	721.4213	9890.0
33177	721.424	34.96	34.51	110.847									3710																						9	VQLYAK		PEP_FRAG_1	117	122	b2b3y2y3y4y6	6	7.0051	7.4364	0.0002	1	16	721.424	3710.0
33178	721.4259	51.42	53.1	39.9291				13161	12386	8735	15415	15343	12332		2492	2490				4324			17165	16857	16704	7234	6345	6576	8073	10971	10439				20	LFNLSK		PEP_FRAG_1	144	149	b2b3b6y1y2y3y4y4*y5	9	8.1043	8.1043	0.0000	16	17	721.4258	16142.0
33183	721.4259	34.81	34.81	111.272						5720																									6	VQLYAK		PEP_FRAG_1	117	122	b2b3b5y3y6	5	7.347	7.4364	0.0002	1	16	721.4259	5720.0
33186	721.4242	32.45	34.38	111.585													1810																		13	VQLYAK		PEP_FRAG_1	117	122	y3	1	5.9213	7.4364	0.0002	1	16	721.4242	1810.0
33196	721.3903	34.3	36.11	38.9743				12955	11737	11329	12717	12582	14883	13690	20131	21177		9491	9343	16876	13396	9676	10077	7027	10228	13256	13965	14407	13026	11734	11790	6186	6016	5943	12	LQADFK		PEP_FRAG_1	491	496	b2b2*b4b4∞b5b6*y2y3y4y5y5∞	11	8.228	8.228	0.0000	21	21	721.3911	24236.0
33202	721.4269	43.63	45.57	42.0191				55192	54681		60336	61314		21347	24124	23123		37393	49353	62304			65002	62818	63083	51207	55443	54858	47149	50871	50947				19	QSFVLK		PEP_FRAG_1	100	105	b2b2∞b3b3*b3∞b4b4*b4∞y1y2y3y4y5	13	8.5092	8.5092	0.0000	19	25	721.4262	66889.0
33204	721.4247	39.77	41.28	108.723				9764	10312	8206	8807	8083	4343	10636	10771	12111	8269		8699	11991	9435	9041	12674	12379	11029	10419	11225	9554	10133	9753	9884	8681	11226	10795	21	NALYIK		PEP_FRAG_1	308	313	b2b3b4y1y2y3y4y6	8	7.7633	7.7633	0.0000	16	17	721.425	10833.0
33205	721.4237	45.26	45.62	109.127						15478			17405				21147																		6	QSFVLK		PEP_FRAG_1	100	105	b3b3∞b4b4*b4∞y3y4y5y6	9	8.2005	8.5092	0.0000	3	25	721.4262	45801.0
33229	721.425	58.0	59.41	40.1744				2924	2491			2348	2637					2826	2787		2088	2337				2060	2430	2489	1574						15	SFLNIK		PEP_FRAG_1	295	300	y3y4	2	6.2991	6.2991	0.0013	12	16	721.4254	2210.0
33230	722.4233	24.27	24.02	43.34	20056	23602	26899																												2	HEIVPK		PEP_FRAG_1	225	230	b2b3b4y2	4	7.6959	7.6959	0.0000	3	3	722.4223	7891.0
33232	722.3402	31.39	30.5	101.085																												2461	2346	2610	29	DMELSK		PEP_FRAG_1	651	656	b3y6	2	5.9764	5.9764	0.0016	1	3	722.341	1552.0
33247	720.4314	38.1	39.83	41.8522				11607	11359		11494	10203		6015	7826	7710		8323	6929	8101			11296	10713	11094	11241	11865	12074	7560	7492	7401	6387	6204	6248	20	LISPYK		PEP_FRAG_1	359	364	b2y2y3y4	4	7.3594	7.3594	0.0004	16	23	720.4306	10764.0
33248	720.4284	38.46	39.76	113.577						3039							3337				2800	2806													6	LISPYK		PEP_FRAG_1	359	364	y3y4	2	7.299	7.3594	0.0004	4	23	720.4301	6545.0
33251	722.3732	37.78	37.78	39.152						4266																									6	IGFEEK		PEP_FRAG_1	32	37	y5	1	5.9292	6.2353	0.0013	1	3	722.3732	4266.0
33266	722.4236	37.22	39.49	43.9753																						3872	4617		2780	2902					23	GYLLTR		PEP_FRAG_1	15	20	y4	1	5.2059	5.2059	0.0027	2	2	722.4239	2969.0
33273	722.3961	41.03	43.22	42.797																							1980								23	MVFTPK		PEP_FRAG_1	194	199	b6∞y4	2	5.8319	5.9012	0.0015	1	4	722.3961	1980.0
33281	721.343	70.34	71.72	104.902				6770	6489	6202	6102	5487	5046	6755	6816	6838	7208	6279		9358	8504	8974	7700	7906	7508	11313	11528	11601	8307	9135	7642	8652	8812	8408	6	EFDTPL		PEP_FRAG_1	1211	1216	b5	1	4.9815	4.9815	0.0029	1	2	721.3422	15618.0
33292	722.4081	34.61	36.65	111.972																		4411													18	IYLEGK		PEP_FRAG_1	108	113	y1y3y4y5y6	5	8.0986	8.2059	0.0000	1	6	722.4081	4411.0
33294	722.4071	34.19	36.57	111.103							1718																								7	IYLEGK		PEP_FRAG_1	108	113	b2b6∞y2y3∞y4	5	6.2223	8.2059	0.0000	1	6	722.4071	1718.0
33303	722.41	31.18	33.45	107.549				14359		12723	13509	14716	12100	7342	11670	11075	9888	10998	10822	17426	13724		13689	14965	15306				12922	12722	13174				16	LYAVEK		PEP_FRAG_1	388	393	b2b3b4y2y3y4y5	7	7.915	7.915	0.0000	19	26	722.4106	22684.0
33304	722.4114	30.98	33.43	40.957					13611													14465				16533	17208	18328							24	LYAVEK		PEP_FRAG_1	388	393	b2b3y2y3y4y5	6	7.8153	7.915	0.0000	5	26	722.4106	16836.0
33305	722.411	34.57	33.73	40.8993																												10031	10242	10557	30	LYAVEK		PEP_FRAG_1	388	393	b2b3y2y3y4	5	7.0472	7.915	0.0000	1	26	722.4099	7835.0
33313	722.3751	33.44	35.63	39.3656				3048	3066	3342	1843												4879	4930	4968	5257		5767	3548	3749	3839				27	IGFEEK		PEP_FRAG_1	32	37	y5y5∞	2	6.2353	6.2353	0.0013	1	3	722.3745	2151.0
33315	722.3735	33.14	35.48	107.782								4388			6767	7119	3648	2691	3587	2496	3098						2338								11	LFDAEK		PEP_FRAG_1	339	344	b3y2y3y4y5	5	7.3025	7.3025	0.0005	4	4	722.374	6797.0
33319	722.4486	48.76	48.01	41.1487	6468	4299																										17120			28	IITFTK		PEP_FRAG_1	213	218	b3b6y2y3y4y5y5∞	7	7.8	8.2066	0.0000	1	24	722.4483	13531.0
33320	722.448	48.58	48.02	107.234																													12790		29	IITFTK		PEP_FRAG_1	213	218	b3y1y2y2∞y3y4y5	7	8.0568	8.2066	0.0000	1	24	722.448	12790.0
33321	722.4474	48.54	48.01	106.803																														13443	30	IITFTK		PEP_FRAG_1	213	218	b3b6y2y3y4y4∞y5y5∞	8	7.9393	8.2066	0.0000	1	24	722.4474	13443.0
33322	722.4105	41.92	42.43	41.9848	24556	24438	22483	110047	107309					63949				109116	134809											121496		93916	95912	92260	29	FSEVLK		PEP_FRAG_1	308	313	b2b2∞b3b3∞b4b5y1y2y3y4y4∞y5	12	9.3291	9.5383	0.0000	12	25	722.4109	79396.0
33329	722.4082	46.01	47.89	105.286				2193	1926						1614	1443					3099			2566	2294	2911	2999	2981							20	SFEVIK		PEP_FRAG_2	92	97	b2b3b4y6	4	6.301	6.7728	0.0011	7	11	722.405	2038.0
33353	722.446	45.45	47.24	108.087				18546	18999		19147	17904	12957	15576	18214	17750	30161	40807	43737	18800			20383	20565	18519	19381	19677		9782	9942	9508				16	IITFTK		PEP_FRAG_1	213	218	b2b3y2y3y4y4∞y5	7	8.2066	8.2066	0.0000	16	24	722.4475	22036.0
33354	722.4466	46.42	47.24	40.9296						17375			8498								11346	19971						18953							18	IITFTK		PEP_FRAG_1	213	218	b2b3b3∞y2y2∞y3y3∞y4y5	9	8.0324	8.2066	0.0000	5	24	722.4443	36974.0
33356	722.3905	58.19	60.25	41.893																1216															16	AIPMYK		PEP_FRAG_1	151	156	y4	1	5.7091	5.7512	0.0016	1	2	722.3905	1216.0
33363	721.3893	31.55	32.46	106.312									31273			25767	13645																	4782	12	IAENFK		PEP_FRAG_1	270	275	b2b3b4b5y2y3y4y4*y4∞y5y6*	11	8.1256	8.4548	0.0000	3	28	721.3921	30325.0
33365	721.3861	32.46	32.1	105.33									2793																						9	FAADAVK		PEP_FRAG_1	315	321	b3b5	2	6.1275	8.2219	0.0000	1	14	721.3861	2793.0
33375	722.3744	57.54	58.74	106.503		7097	6493	25109	18834	24497	23681	31055	28789		7181	7702	24491	19455	31366	19704	19952	18310	18083	17541	17050	6118	6579	6846					3868	4774	6	DAFLEK		PEP_FRAG_1	149	154	b3b4b5b6	4	5.9286	5.9286	0.0016	1	4	722.3744	72243.0
33387	722.3736	52.42	54.0	106.095				8330	8662	9397	7778	7314	8023	9726	8631	9284	6975	6338	10211	7571	11076	9207	10385	9620	9574	8740	9212	8248	7357	7687	8014				23	FEGLEK		PEP_FRAG_1	188	193	b2y1y2y2∞y4y5y6	7	6.3601	6.3601	0.0013	2	2	722.3742	6813.0
33401	722.3748	57.14	58.19	106.415	8748	7633	7338	21735	21521	25500	26248	31705	29199	7771	8799	9100	26138	20484	29004	19971	20225	17678	18829	19036	18164	9094	7604	7553				5222	5342	5486	29	DAFLEK		PEP_FRAG_1	149	154	y4y6	2	5.7131	5.9286	0.0016	2	4	722.3769	3550.0
33406	722.3869	48.65	50.03	109.425	4126			8163	8392	8011	8301	7524		9578	9335	8950	7514	6930	7578	11038	12651	10792	9761	9329	8743	10735	10562	10243	9244	9531	8428	8724	9068	9804	14	LTADFR		PEP_FRAG_1	21	26	y5	1	6.6551	6.6921	0.0011	1	2	722.3865	3444.0
33419	722.4968	44.37	43.2	42.54	27356																														1	VILHLK		PEP_FRAG_1	186	191	b2y1y2y3y4y5	6	8.2423	9.1548	0.0000	1	22	722.4968	27356.0
33420	722.4959	46.47	45.89	42.102																												8277	8379	7951	28	LLVHLK		PEP_FRAG_1	487	492	y3y4y5	3	6.843	7.408	0.0003	3	23	722.496	6131.0
33430	723.3335	27.37	26.52	101.59	34892	36596	30473																									40773	39054	39166	30	DGADFAK		PEP_FRAG_1	141	147	b2b3b4b5b6y3y4y6	8	8.787	8.787	0.0000	6	7	723.3332	34766.0
33440	722.4949	43.23	45.17	42.2533				8426	9283		9395	9662		11633	10775	12314		11508	11546	9196			6516	7457	6509	8621	8238	8372	6574	7250	8821				11	LLVHLK		PEP_FRAG_1	487	492	y3y4y5	3	7.408	7.408	0.0003	19	23	722.4939	11012.0
33443	723.3472	24.13	23.93	38.252																												1682	1696	2899	28	TGENFR		PEP_FRAG_1	95	100	y3y5	2	7.2234	7.2234	0.0005	2	2	723.3467	1252.0
33447	723.3094	75.69	77.26	96.991																2089	2882	2993	1487						2021	2008					16	KQSLGE	Phosphoryl STY(3)	PTM	56	61	b6b6-H3PO4	2	0.0	0.0	0.0016	5	10	723.3112	1819.0
33460	723.4059	34.29	33.61	38.547																												3337			28	FASASIK		PEP_FRAG_1	434	440	y5y6	2	6.6071	7.0439	0.0006	1	16	723.4059	3337.0
33461	723.4039	34.34	33.6	38.505																														3187	30	FASASIK		PEP_FRAG_1	434	440	y5y6	2	6.6095	7.0439	0.0006	1	16	723.4039	3187.0
33466	722.497	40.51	42.52	41.9352				117344	119258		136126	146234		67957	57625	58015		117050	107116	105638	119200		118253	134993	129004	140663	139873	134301	121218	111044	113814				20	VILHLK		PEP_FRAG_1	186	191	b2b4b5y3y4y5	6	9.1548	9.1548	0.0000	18	22	722.495	151059.0
33469	723.3865	38.0	37.03	109.142																														1203	30	FAQMVK		PEP_FRAG_1	427	432	b3y6	2	4.9065	5.7487	0.0016	1	5	723.3865	1203.0
33490	723.3694	45.37	44.71	37.964																												4535	3396	3159	29	SFDNIK		PEP_FRAG_1	95	100	y4	1	6.4015	6.4015	0.0013	1	2	723.3701	2180.0
33492	723.3889	34.48	36.61	39.5609				2248	2048	4145		3082				1555								2115		1954	2964	1873	2518	1899	2377				23	FAQMVK		PEP_FRAG_1	427	432	y2y3y5	3	5.7487	5.7487	0.0016	3	5	723.3885	1902.0
33493	723.3876	50.43	49.85	37.4183		4516	4225						11702																						2	AGGFLMK		PEP_FRAG_1	185	191	y6	1	5.8885	9.228	0.0000	1	28	723.3857	1071.0
33494	723.3885	50.26	49.78	105.022																												61643	56176	64142	28	AGGFLMK		PEP_FRAG_1	185	191	b4b6y1y2y3y4y5y6	8	9.0223	9.228	0.0000	3	28	723.3882	51717.0
33495	723.3491	48.96	50.89	105.03																									5353	5363	4602				27	GEWGFK		PEP_FRAG_1	65	70	b4y1y2y6	4	5.91	6.3528	0.0013	1	3	723.348	2561.0
33499	723.4021	30.74	33.11	38.5233					5527	7231	6407	4544						2073			2892		1740	2049	2804	4892	4859	4686		2612					5	FASASIK		PEP_FRAG_1	434	440	y4∞y5y6	3	7.0439	7.0439	0.0006	9	16	723.4056	3620.0
33525	722.4212	44.48	46.04	111.041						2569			2897		2318	2938	1907			2555	2824		2323	2131	2132	1885		2017							20	SLAYLR		PEP_FRAG_1	69	74	b3b3∞y6	3	5.8839	5.8839	0.0016	2	2	722.4239	1714.0
33528	723.3727	88.8	90.3	106.539					2150	3780		2547			1693	2341	2937				4023	3621			1707	8106	4675	4454		2175					18	FPAFEL		PEP_FRAG_1	394	399	b3b4b5y2∞y5y6	6	6.5449	6.5449	0.0011	9	12	723.3714	4789.0
33530	723.3721	90.05	90.87	105.967																												1913	2322	2143	29	FPAFEL		PEP_FRAG_1	394	399	b3	1	4.9487	6.5449	0.0011	1	12	723.3712	1774.0
33531	723.375	89.91	90.69	106.112																												1714			28	FPAFEL		PEP_FRAG_1	394	399	y5	1	6.0629	6.5449	0.0011	1	12	723.375	1714.0
33544	723.3878	47.18	48.85	105.312				79671	84432	82721	75605	74587	80087	69296	77022	80713	37827			80370	72532	72596	71023	71645	70286	94792	90301	89114	77014	79838	82775				21	AGGFLMK		PEP_FRAG_1	185	191	b2b4b5b6b7y1y2y3y4y5y6	11	9.228	9.228	0.0000	22	28	723.3884	71214.0
33547	723.3866	47.46	48.77	37.607															61653																15	AGGFLMK		PEP_FRAG_1	185	191	b2b3b4b5y2y3y5y6	8	8.4592	9.228	0.0000	1	28	723.3866	61653.0
33549	723.3883	47.09	48.91	37.372														37489																	14	AGGFLMK		PEP_FRAG_1	185	191	b2b4b5y1y2y3y4y5y6	9	8.5144	9.228	0.0000	1	28	723.3883	37489.0
33558	723.4057	30.91	30.25	38.2087	55892	61269	66631																												1	VQVSYK		PEP_FRAG_1	103	108	b2b2*b3*b4*y2y3y4y5y5*y5∞	10	8.1661	9.3687	0.0000	1	17	723.4062	20012.0
33562	723.4055	30.2	30.2	106.953						117309																									6	VQVSYK		PEP_FRAG_1	103	108	b2b2*b3b4b4∞b5b5*b5∞b6b6*y1y3y3∞y4y4∞y5y5*y5∞y6	19	9.3687	9.3687	0.0000	1	17	723.4055	117309.0
33566	724.4103	31.98	30.92	38.04																														7426	30	GPAGLGPR		PEP_FRAG_1	695	702	b2b3b8y3y5y6	6	7.0744	7.0744	0.0006	1	6	724.4103	7426.0
33567	724.4367	25.86	25.22	40.6082	8020	8222	12761																									3127	3481	3463	30	LIDHVK		PEP_FRAG_1	387	392	y4y5	2	6.6019	6.6019	0.0011	3	3	724.4365	2505.0
33571	724.4499	25.11	27.9	43.5006					2570		3416	4080						3278								4345	4203	5397	3969	4175	5393				25	HLIVSR		PEP_FRAG_1	297	302	b2y4y5	3	6.7091	6.7091	0.0011	2	2	724.4495	2320.0
33575	724.3628	29.09	31.63	105.686											1611		2063			1538						2459	1901	2171							23	GDYTIR		PEP_FRAG_1	884	889	y4y6	2	5.6146	5.6146	0.0019	3	4	724.3637	1200.0
33579	724.3886	33.42	32.59	103.105																												7309	6916	7788	29	ETVFTK		PEP_FRAG_1	258	263	b2∞b3b6y2y3y6	6	7.9495	7.9495	0.0000	3	4	724.388	4862.0
33584	724.3982	34.04	32.98	42.918		1084																													2	YVLSSR		PEP_FRAG_1	158	163	y4	1	5.3732	6.866	0.0011	1	15	724.3982	1084.0
33585	724.3446	34.63	34.63	103.695						55616																									6	GYWGNK		PEP_FRAG_1	168	173	b4b6*y2y2*y3y3*y4y4*	8	8.2049	8.5886	0.0000	1	22	724.3446	55616.0
33586	724.3447	35.91	35.11	103.636																												9653	9280	12260	28	GYWGNK		PEP_FRAG_1	168	173	y1y3y4y6	4	7.7508	8.5886	0.0000	3	22	724.3445	7393.0
33608	723.453	42.23	43.44	40.3754	16435	16441	15509	8838	9191	6303	9204	8835	6792	7946	7656	7869		28046	23056	15673	13203	12640	8335	7256	7446	17258	16064	14896	8058	8748	9363	6584	7299	7386	15	APGIIPR		PEP_FRAG_1	176	182	b4y2y3y4y5y6	6	7.4256	7.4256	0.0003	8	9	723.452	23613.0
33614	722.4077	53.09	54.65	107.242				8916	9172	8090	7006	4511	7135	3337	6763	6554	9281	5185	7077	4705	4299	8721	12285	11947	10755			8542	9162	9859	9217				27	DTVFLK		PEP_FRAG_1	590	595	b3	1	4.8258	4.8258	0.0030	2	2	722.4101	3151.0
33630	724.3443	31.88	34.15	104.128				16484			16453	12097	19891	7634	12856	13497					4626	5299	23674	22035	29370	8138	7226	7904	12604	8822	10265				20	GYWGNK		PEP_FRAG_1	168	173	b3b4y2y3y4y4*	6	8.5886	8.5886	0.0000	18	22	724.3437	23175.0
33642	724.3452	41.11	43.12	43.5482				2765	2237									2364								2909	1993	2287	2121	1706					24	MDLSMK		PEP_FRAG_1	1	6	y1y3	2	5.148	6.0504	0.0015	1	8	724.3432	1573.0
33643	724.3705	46.81	48.15	39.0981					3646	2629	2264	1895	2350			2764		2713		3758			4442	4213	3847	4781	4998	4868	3245	2005		2585	3305	2184	28	LEGMFK		PEP_FRAG_1	645	650	y5	1	6.6652	6.6652	0.0011	4	7	724.3736	1723.0
33646	724.3736	34.28	36.19	107.552				8485			8090	7124	8040		4879	7543	7548			10768			5899	8048	8053	9093	9015		8417		7656	3070		3730	16	YMPSVK		PEP_FRAG_1	138	143	b1b2y3y4y5	5	8.2386	8.2386	0.0000	17	26	724.3733	13383.0
33648	724.3747	34.25	36.19	41.2286					9496	10083								13259	10582		8321	7900						9568		8326					18	YMPSVK		PEP_FRAG_1	138	143	b1b2b4∞b5y3y4y5	7	8.0545	8.2386	0.0000	8	26	724.3734	11491.0
33660	724.3709	45.87	47.5	39.4937					2965				3545			2212			3463		3372					2913	3292	4705	2016	1926	2012				23	LEGMFK		PEP_FRAG_1	645	650	y5	1	6.1056	6.6652	0.0011	2	7	724.3719	2119.0
33677	724.3655	27.71	30.36	40.0309				5508	4866			3328							2168	3964	3482	3082	3648	3821		3497	3736	4254	2811		2410				23	LGYDTR		PEP_FRAG_1	287	292	y2y5	2	6.5704	6.5704	0.0011	3	7	724.3632	2348.0
33678	724.3644	28.41	30.41	103.436							6271		7501		3693	6398																			12	LGYDTR		PEP_FRAG_1	287	292	y2y5	2	6.5356	6.5704	0.0011	2	7	724.3638	6496.0
33700	724.3419	44.34	45.82	105.041						2180										2549	3241	3271	3162	3083	2708	3210	3677	3838	2686	2396	2117	1910		1858	16	MDLSMK		PEP_FRAG_1	1	6	b3b4b4∞y2y3y4∞y6	7	6.0504	6.0504	0.0015	7	8	724.3428	2184.0
33748	724.5104	59.54	61.0	43.0698		4328		2800				3031						5618	3904							5547	4711	4859	2625	2658	2301				26	LLLLPR		PEP_FRAG_1	34	39	y5	1	5.8969	5.8969	0.0015	3	3	724.5099	1597.0
33750	725.371	23.93	23.8	39.1088	6793	6715	7802																									8589	8167	8287	28	SFMNVK		PEP_FRAG_1	824	829	y4	1	5.4318	5.4318	0.0024	1	2	725.3708	7282.0
33755	725.3318	26.78	25.87	38.6393			12518																									22569	22354	24972	30	MFNGEK		PEP_FRAG_1	84	89	b2y3y4y4*y5	5	8.5699	8.5699	0.0000	4	5	725.3303	22008.0
33794	725.3412	34.06	36.41	38.8239				2259	2293			2248			1731	1964		3076	4302	2315	3275	3263	1336		1895	1713			1838	1939					26	AANMYR		PEP_FRAG_1	2	7	b6*y4y5*	3	5.0733	5.3045	0.0026	1	2	725.3399	1109.0
33804	725.3994	53.7	52.9	37.2607		6512	5177																									6712		9262	28	ANVFFK		PEP_FRAG_1	51	56	b2b3y1y2y3y5*	6	7.9128	7.9478	0.0000	3	28	725.3989	4837.0
33805	725.4018	53.55	53.15	37.365																													5452		29	ANVFFK		PEP_FRAG_1	51	56	b2b3y2y3y4y5y5*	7	7.6494	7.9478	0.0000	1	28	725.4018	5452.0
33813	724.3896	41.93	43.41	108.54				12229	10444	10785	10702	9685	8930	7569	8011	8400	8482	8048	9332	12105	12605	15534	11148	11925	11935	11709	11016	10958	10805	9705	9183	7126	7695	7570	18	DYLSVK		PEP_FRAG_1	304	309	b2b3b4b4∞b5∞y1y2y3y4y5	10	7.9034	7.9034	0.0000	26	26	724.388	26878.0
33827	725.4	50.63	52.33	37.3011				7253	7710	6833	8134	8031		4154	4935	5084		8497	8408	8636	5913	3970	9810	8978	8232	9722	9227	9622	8201	6628	7611				4	ANVFFK		PEP_FRAG_1	51	56	b2b3y2y3y4y5*	6	7.9478	7.9478	0.0000	22	28	725.3994	5062.0
33828	725.3966	52.53	52.39	110.638									13800																						9	ANVFFK		PEP_FRAG_1	51	56	b2b2*b3y2y3y4y5y5*	8	7.3996	7.9478	0.0000	1	28	725.3966	13800.0
33871	724.4007	30.09	32.55	111.134				5139	4898		6649	7011	6162	2657	8050	8620	9347	8937	7116	6592	3277	2079	4323	3658	4057	6088	5860	6860	4014	4790	4894				15	YVLSSR		PEP_FRAG_1	158	163	b5∞y1y3y4	4	6.866	6.866	0.0011	11	15	724.4	5320.0
33873	724.4382	37.84	39.97	42.6404				12083	14132		10580	9449		6884	7603	6598		19424	17997	10537			9215	9145	8486	10938	11314	10050	6785	8188	6656				15	LPIEPR		PEP_FRAG_1	858	863	y2y3y4y5	4	7.5887	7.5887	0.0000	15	15	724.4378	17503.0
33883	725.4295	39.88	41.05	113.334						2322											1713	1700													17	QHSLLK		PEP_FRAG_1	53	58	b4y6	2	5.5683	5.9211	0.0016	1	2	725.4291	1837.0
33892	725.4952	54.73	54.35	114.539																												2002	2002	2290	29	LAAPLLK		PEP_FRAG_1	418	424	y4y7	2	7.0438	7.0438	0.0006	3	7	725.495	1289.0
33894	725.494	53.01	53.82	115.207						2104			2430				3196			1426															6	LAAPLLK		PEP_FRAG_1	418	424	y4y5y7	3	6.7566	7.0438	0.0006	3	7	725.4941	2928.0
33923	726.351	29.15	28.42	104.431																												2069			28	YMVADK		PEP_FRAG_1	261	266	b2b6y3∞y4y4∞y6	6	7.6	7.6	0.0000	1	5	726.351	2069.0
33927	726.3683	28.31	27.37	105.683																												3951	3605	3289	28	SLYSEK		PEP_FRAG_1	104	109	b3y3y4y5y6	5	7.8769	7.8769	0.0000	3	3	726.3688	2840.0
33933	725.4682	48.74	50.4	111.919					3758	3249	2820	4063	4513		3974	3346	3354		2520	4367			4779	4546	4466	4338	3004	4610	2849	2998	3061				19	GAVLPIR		PEP_FRAG_1	193	199	y3y4	2	7.3282	7.3282	0.0004	3	3	725.4681	3825.0
33936	726.4069	34.9	34.0	40.245																												7058	8299	8314	30	FPHGIR		PEP_FRAG_1	113	118	b2y3y4	3	6.4359	7.3339	0.0004	3	18	726.406	5970.0
33944	726.3468	37.22	38.82	105.075													1116																		13	YMVADK		PEP_FRAG_1	261	266	y3	1	6.3013	7.6	0.0000	1	5	726.3468	1116.0
33947	726.4078	33.78	36.01	38.8791				2102	2390		1961		2181		2242	2189				2481				1296	1566	1646	1789	1690							24	GIPFHR		PEP_FRAG_1	330	335	y4	1	6.1276	6.1276	0.0015	2	4	726.4081	1181.0
33970	726.4509	34.04	36.38	39.0554				3467	4116		3305	3170								2631	2986	2861		2832	2762	3870	4002	4330	2676	2885					24	LPQIQK		PEP_FRAG_1	119	124	b3y5	2	6.0191	7.2024	0.0005	3	5	726.4506	3033.0
33971	726.4503	36.49	36.49	106.927						1332																									6	LPQIQK		PEP_FRAG_1	119	124	b3y5y6	3	6.2182	7.2024	0.0005	1	5	726.4503	1332.0
33973	726.397	49.99	49.45	42.274																														4678	30	FAYLGR		PEP_FRAG_1	135	140	y1y4y5	3	6.5704	7.634	0.0000	1	15	726.397	4678.0
33977	726.4511	53.69	55.79	41.011																2123															16	VPELIR		PEP_FRAG_1	129	134	y4	1	4.4135	7.137	0.0006	1	14	726.4511	2123.0
33978	726.4528	49.92	49.14	42.2695	10154	9622	10075																									4390	4742	4409	28	VPELIR		PEP_FRAG_1	129	134	y3y4y5	3	7.137	7.137	0.0006	5	14	726.4519	2927.0
33986	726.4515	55.72	56.52	112.024				2121		4117			3926				2703		5430		4304														15	LLDPIR		PEP_FRAG_1	320	325	y5∞y6	2	6.0555	6.365	0.0013	1	3	726.451	4892.0
33990	726.4527	46.86	48.69	42.102				2848	3417		3391	3626						2333	2379							2168	2086	1809			2289				5	VPELIR		PEP_FRAG_1	129	134	y3y4y5	3	6.7177	7.137	0.0006	5	14	726.4528	2170.0
34017	726.4068	31.26	33.54	40.3204				13757	13460	10182	13307	12971	12630	3077	4507	4387		21064	21629	17967	16945	19708	14499	15600	15433	17009	15815	16504	14429	13954	15986				16	FPHGIR		PEP_FRAG_1	113	118	y3y4y5	3	7.3339	7.3339	0.0004	13	18	726.407	23428.0
34028	726.453	64.7	65.81	113.758				1887		3199			3375		1360	1526			2696		3365	2934	2331	2291	1962				1731			2197	2162		20	LVEPLR		PEP_FRAG_1	1145	1150	b3y6	2	6.136	7.6119	0.0000	1	11	726.4536	1694.0
34052	726.3978	46.94	48.88	42.1499				14610	14101		12326	12152		5171	6551	6791				3412			11701	11492	13897	3217	3452				6450				21	FAYLGR		PEP_FRAG_1	135	140	b3y1y3y4y5	5	7.634	7.634	0.0000	11	15	726.3978	13136.0
34053	726.4158	36.63	38.27	103.757				11527	10488	9444	12378	13467	13841		3187	3145	5882	6096	10326	11700	17267	15161	8942	8699	8358	12336	12213	11121	13229	12240	12186	11480	11894	12016	19	SIEHLK		PEP_FRAG_1	1037	1042	b5y4y6	3	6.527	6.527	0.0011	2	2	726.4167	8403.0
34059	727.3943	32.96	35.49	104.625											1369																				11	GTVWHK		PEP_FRAG_1	119	124	b3	1	4.7743	5.3511	0.0025	1	2	727.3943	1369.0
34060	726.3955	48.32	48.92	110.619						4129			7145																1997						6	FAYLGR		PEP_FRAG_1	135	140	b3y5y6	3	6.6632	7.634	0.0000	1	15	726.396	10905.0
34067	726.451	40.89	42.53	112.712				2310	2147	2971			4109		2961	3252	3179		2201	2326	2126	2325	2931	3127											9	LVEPLR		PEP_FRAG_1	1145	1150	b2y3y4y6	4	7.3288	7.6119	0.0000	2	11	726.4514	4239.0
34069	726.4542	40.58	42.56	43.9334							9509	10118		3834				8692								6605	5453	5794	4499	5895	5120				7	LVEPLR		PEP_FRAG_1	1145	1150	b2y2y3y4y5	5	7.6119	7.6119	0.0000	6	11	726.4536	5874.0
34074	727.4364	29.86	31.79	106.899								2734														4206		2448		2187	6072			5143	27	DGVLPVK		PEP_FRAG_1	705	711	y3y7	2	5.8863	6.0258	0.0015	2	11	727.4353	3440.0
34076	727.434	32.83	32.21	106.721																												3341			28	DGVLPVK		PEP_FRAG_1	705	711	y3y7	2	6.0258	6.0258	0.0015	1	11	727.434	3341.0
34096	727.449	44.31	43.46	112.446																												2427	2861	3807	30	GLTPLAR		PEP_FRAG_1	273	279	y3y7	2	6.118	6.6796	0.0011	1	4	727.4491	2428.0
34097	726.4529	65.39	66.55	113.787	4970			2281	1789	3665			4636				2367			3486	4743	5141	4263	4041	4183	5654	4383	4343	3918	4164	3579	2755	3493	2773	9	DLPLLR		PEP_FRAG_1	57	62	b2b3∞b5∞y4y6	5	6.3001	6.3001	0.0013	2	2	726.4519	7893.0
34113	727.3949	41.54	43.64	40.6363											1929	2103								1673	1750				2239	2632	2505				12	LHQAMK		PEP_FRAG_1	282	287	b4	1	5.6857	5.6857	0.0017	2	2	727.3954	1630.0
34116	727.4389	48.48	50.38	40.074												1373																			12	DGVLPVK		PEP_FRAG_1	705	711	y2y3	2	5.5208	6.0258	0.0015	1	11	727.4389	1373.0
34127	727.4371	31.39	33.24	41.0212					2087	4175	3081	2874								1183	1988	1227	1502	1488	2473	1992	2017	2333			1917	2814	2547	2610	6	LVDPGVK		PEP_FRAG_1	86	92	y4y5	2	6.0967	6.0967	0.0016	4	7	727.4374	9933.0
34132	727.436	58.24	59.46	40.119																		2125													18	DGVLPVK		PEP_FRAG_1	705	711	y3	1	5.4952	6.0258	0.0015	1	11	727.436	2125.0
34157	727.4732	27.88	26.98	39.5658	4680	4003	4477																									7739	7585	7478	1	LKPEIK		PEP_FRAG_1	117	122	y4	1	6.5184	6.5184	0.0011	3	3	727.4738	1198.0
34171	727.5098	57.69	57.24	114.97	40652																														1	ALVILAK		PEP_FRAG_1	6	12	b3b4b5b6y1y2y3y4y5	9	8.2086	8.9864	0.0000	1	29	727.5098	40652.0
34194	726.4536	44.11	42.93	44.141	1855																														1	LVEPLR		PEP_FRAG_1	1145	1150	y3y4y5	3	7.1804	7.6119	0.0000	1	11	726.4536	1855.0
34217	727.4124	35.87	37.39	42.2587	83326	83699	97195	58405	60602		48308	51057		30737	34368	34514		81990	83179	62383	41732		73493	66579	69372	61329	57374	52665	54885	52862	54411	35905	36933	38340	22	NPVIER		PEP_FRAG_1	478	483	b3b6y1y3y3∞y5y6*	7	6.4676	6.4676	0.0012	1	2	727.4129	56936.0
34218	727.4102	36.53	37.35	103.584						16995			18061				29713					15501													6	NPVIER		PEP_FRAG_1	478	483	b2b2*b5*y2∞y5y5∞y6y6*	8	5.8418	6.4676	0.0012	1	2	727.4119	48316.0
34233	728.3721	45.24	44.66	40.886																												1009			28	GYSFVR		PEP_FRAG_1	241	246	y4	1	5.6384	5.6384	0.0018	1	2	728.3721	1009.0
34244	728.3636	48.9	48.25	39.9957																												8686	9089	9485	28	FDFTAK		PEP_FRAG_1	636	641	b2y3y4y5	4	7.5135	8.0172	0.0000	3	24	728.364	6489.0
34247	727.5096	54.85	56.41	114.476				87148	82184	90147	96357	88385	95982	71463	89920	96510	69378	72376	85644	99410	93505	86452	79535	74193	83958	75771	76039	74116	102467	100566	95503				16	ALVILAK		PEP_FRAG_1	6	12	b2b3b4b5b6y1y2y3y4y5y6	11	8.9864	8.9864	0.0000	23	29	727.5103	126331.0
34256	727.5097	57.38	56.94	114.038		119589	132111																									62451	71537	68781	2	ALVILAK		PEP_FRAG_1	6	12	b2b3b4b5b6y1y2y3y4y5y6	11	8.552	8.9864	0.0000	5	29	727.5106	46526.0
34257	728.4304	25.87	25.27	40.577																														1617	30	LQPGSVK		PEP_FRAG_1	65	71	y5	1	6.3922	6.5997	0.0011	1	3	728.4304	1617.0
34259	728.4317	25.77	25.23	40.637																												1205			28	LQPGSVK		PEP_FRAG_1	65	71	b6*y5	2	6.5997	6.5997	0.0011	1	3	728.4317	1205.0
34262	728.4146	28.19	27.3	39.7843																												5356	4785	4470	29	FPTHVK		PEP_FRAG_2	220	225	y4y5y5∞	3	6.702	6.702	0.0011	3	4	728.4157	3343.0
34265	728.442	29.48	28.59	39.606																												5957	4050	3285	29	IGQAIAR		PEP_FRAG_1	164	170	y6*	1	6.218	6.3702	0.0013	1	2	728.4423	2736.0
34273	728.3985	32.97	34.92	106.072							2606	2267	6591	2563	2501	2573																			7	LVDPER		PEP_FRAG_1	192	197	b4y6	2	4.8956	5.672	0.0017	1	3	728.3986	1486.0
34286	728.467	31.33	33.96	40.7928								5884						8401								10377	4778				18381				27	IQQLVK		PEP_FRAG_1	371	376	b2b3b3*b4y3y4y5y5*	8	8.1644	8.9526	0.0000	5	13	728.4657	11192.0
34290	728.4679	35.49	34.59	41.0315	45198	44831	46457																									59724	58460	51757	30	IQQLVK		PEP_FRAG_1	371	376	b2b2*b3b3*b4y2y3y4y4*y5y5*	11	8.9526	8.9526	0.0000	6	13	728.4687	41962.0
34291	728.4487	34.79	36.76	41.745																	11729														17	FILHAK		PEP_FRAG_1	507	512	y3y4y5	3	7.0435	7.4721	0.0001	1	13	728.4487	11729.0
34303	727.4467	41.04	42.84	112.752				2333	1849	2742	2684	3028	4202	2589	4245	4356		2148	2761	2793	2742	3034	4172	3879	3750	2376	2479	1725	1887	1947					12	GLTPLAR		PEP_FRAG_1	273	279	y4y7	2	6.6796	6.6796	0.0011	1	4	727.4485	3593.0
34308	728.4004	38.42	40.46	41.619														2811																	14	TFYLGK		PEP_FRAG_1	710	715	b5∞	1	4.2897	6.8773	0.0010	1	12	728.4004	2811.0
34314	728.3961	46.98	46.25	41.853																														1101	30	LVDPER		PEP_FRAG_1	192	197	y3	1	5.672	5.672	0.0017	1	3	728.3961	1101.0
34315	728.3638	46.35	47.84	109.593				4272					5528		5212		3942	3197	3941	4542															16	FDFTAK		PEP_FRAG_1	636	641	b2b3y2y3y4y6	6	7.3407	8.0172	0.0000	6	24	728.3656	4296.0
34318	728.4474	34.65	37.04	41.69					7577		7688	6873											8054	6585	8064	7154			7257						21	FILHAK		PEP_FRAG_1	507	512	y3y4y5	3	7.1962	7.4721	0.0001	8	13	728.4453	7879.0
34319	728.3662	46.11	47.86	40.0053					11702	9887	10654	9876		11275		12252						10979	14360	11925	11843		11905	12706	13423	13025	12056				19	FDFTAK		PEP_FRAG_1	636	641	b2b3b4∞y2y3y3∞y4y5	8	8.0172	8.0172	0.0000	15	24	728.3644	13556.0
34320	727.4367	62.14	63.37	108.35					5107	5433	4226	4465	4781	3783	5231	4907	4459	3466	5371		5195	4954	5758	5543	5727	5642	5363	4892	5093	5229		10509	9657	10919	6	DGVLPVK		PEP_FRAG_1	705	711	b4∞b6y4y6	4	5.5221	6.0258	0.0015	2	11	727.4368	14518.0
34324	728.3623	44.14	45.99	105.607					4867							4561	4411	4842						6871		4688	5287	5826							24	SFFEAK		PEP_FRAG_1	192	197	b3y2y4y6	4	6.6185	6.6185	0.0011	3	4	728.3615	4324.0
34326	728.396	34.52	36.91	107.458				2989	2979		2055	1819			2854	2802				4703				5370		3702			4074	4247	4599				22	EVDPLR		PEP_FRAG_1	165	170	y3	1	5.8069	5.8639	0.0016	1	3	728.3975	2506.0
34334	727.5086	56.74	58.4	41.3874				2960	2462	2673	1863	2031			1717	2153		3074	3813				2577	2248	2298	2665	2416	2442	1847						21	ILQLLK		PEP_FRAG_1	69	74	y4y5	2	6.38	6.38	0.0013	6	9	727.5084	1686.0
34338	727.5112	57.23	58.19	41.846																	3437														17	ILQLLK		PEP_FRAG_1	69	74	y4	1	5.6185	6.38	0.0013	1	9	727.5112	3437.0
34347	728.4689	57.19	58.98	113.499							1849																								7	NQIILK		PEP_FRAG_1	218	223	y2y3y4	3	6.0982	6.0982	0.0015	1	9	728.4689	1849.0
34355	728.3075	42.37	43.92	41.0002				2626	2110		2056	2036	1320		1325	1563						1027	2470	2426	2164	2096		1879	2320	2282			2147	1981	9	MDSGYR		PEP_FRAG_1	440	445	y5	1	5.4324	5.4324	0.0024	2	2	728.3042	1170.0
34356	728.4002	46.81	48.39	110.778				2270	4442	2536			2530		1406	2318	1975			1632	2239	2184	3251	3389	2021				2539						19	TFYLGK		PEP_FRAG_1	710	715	b2b3b6y2y3	5	6.8773	6.8773	0.0010	7	12	728.3994	2491.0
34357	728.4024	46.38	48.41	41.925																						2078									22	TFYLGK		PEP_FRAG_1	710	715	b5∞y3y4	3	6.1775	6.8773	0.0010	1	12	728.4024	2078.0
34360	728.4685	67.96	67.96	115.868						1537																									6	VIDLLR		PEP_FRAG_1	333	338	y4∞	1	6.3591	7.6978	0.0000	1	9	728.4685	1537.0
34362	728.4663	68.39	68.8	115.938															1298																15	NQIILK		PEP_FRAG_1	218	223	b3y1	2	4.4214	6.0982	0.0015	1	9	728.4663	1298.0
34371	728.4677	67.89	69.05	115.11						1404	1855	2011	2962		2002	2271																			12	NQIILK		PEP_FRAG_1	218	223	b3y6	2	5.1703	6.0982	0.0015	4	9	728.4676	1689.0
34379	727.4732	46.69	48.36	111.668				2301	1905	2676		2328	3681		2318	2518	2550	2064	2842	3365	3108	3261	2300	2025	2045	2658	2684	2227	3180	3225	3026				9	SIPVLAK		PEP_FRAG_1	102	108	b4∞y3y5y7	4	7.2563	7.2563	0.0005	20	23	727.471	4266.0
34382	727.4736	49.39	48.76	111.033																												1704	1849	1954	28	SIPVLAK		PEP_FRAG_1	102	108	y5y7	2	6.9781	7.2563	0.0005	3	23	727.4733	1136.0
34383	728.4421	39.15	40.56	107.963						2302			1614			3784	3669	2354	2981	3536	2365	2515	4019	3662	3492	1557	1823	2186	2272	2095	2117	2846	2145	3954	16	NINIVR		PEP_FRAG_1	51	56	y4y5	2	6.8338	6.8338	0.0011	3	5	728.4428	3273.0
34393	728.4457	39.27	38.19	41.725	5666	4589	4913																												1	FILHAK		PEP_FRAG_1	507	512	y4	1	5.8131	7.4721	0.0001	2	13	728.4457	1366.0
34397	728.4452	38.73	37.91	41.31																														6638	30	FILHAK		PEP_FRAG_1	507	512	y3y4y5	3	7.2746	7.4721	0.0001	1	13	728.4452	6638.0
34398	728.4484	38.7	37.94	41.66																												6277			28	FILHAK		PEP_FRAG_1	507	512	y3y4y5	3	7.4721	7.4721	0.0001	1	13	728.4484	6277.0
34399	728.3313	40.33	41.84	104.525				3378	2981	3071	1866	1838	3658		2086	2095			2498	3410	3507	3258	5987	5018	4797	4434	3617	3372	3814	3526	3801	2444	2768	3001	28	MTDYAK		PEP_FRAG_1	299	304	b3y6	2	5.8219	5.8219	0.0016	5	5	728.3314	1624.0
34402	728.4649	48.67	49.96	111.385													3550																		13	LLGLGQK		PEP_FRAG_1	46	52	b3y3y4y5y7	5	7.009	8.1425	0.0000	1	24	728.4649	3550.0
34408	728.4671	61.56	63.04	113.224				5339	4739	4742	3808	4906	4172				4408	3069	4473	4159	4301	3901	4602	4619	4355	5334	5255	4898	3779	3758	3840				21	DLLLVR		PEP_FRAG_1	91	96	b3y5y6	3	6.043	6.043	0.0015	6	8	728.4671	3270.0
34410	728.466	63.53	63.4	112.375																												4682	4812	5738	28	DLLLVR		PEP_FRAG_1	91	96	b3y5y6	3	5.968	6.043	0.0015	2	8	728.4669	3236.0
34411	728.3975	48.05	49.69	110.223				5018	4717	4689	3534	3314	4376	4929	5576	5387	4048			5829	5282	5822		5141	5010	5515	5951	5402	4169	4352	4116				21	GYFLTK		PEP_FRAG_1	77	82	b2b3y2y3y4	5	7.309	7.309	0.0005	19	21	728.3985	4106.0
34423	728.4939	62.95	64.44	42.5621	4390			4918	5018		2541	3815				1905		2929	3452	3923			3948	4120		5190		4723	2221	2357	2401			6045	15	LILELK		PEP_FRAG_1	263	268	y4y5	2	6.2498	6.2498	0.0013	2	2	728.4913	2648.0
34433	729.4275	29.04	28.26	38.87																												15249	17309	15892	29	LNLQNK		PEP_FRAG_1	749	754	b2b3b5y1y2*y3*y4y5y5*	9	8.4154	8.4154	0.0000	1	2	729.4273	14071.0
34445	729.4277	26.76	25.93	111.121																												21193	17792	22086	30	NAGAVIGK		PEP_FRAG_1	53	60	b2b3b4b4*b5b5*y1y2y3y4y6y7	12	8.5782	8.5782	0.0000	3	5	729.4274	19320.0
34458	728.4691	36.09	35.55	109.591									7608																						9	ILQNIK		PEP_FRAG_1	270	275	b3b4y3*y4y4*y5	6	7.2153	7.2164	0.0005	1	6	728.4691	7608.0
34473	729.4286	27.01	26.29	111.147		2401																													2	NAGAVIGK		PEP_FRAG_1	53	60	b4	1	5.8986	8.5782	0.0000	1	5	729.4286	2401.0
34475	729.4252	32.0	34.27	105.39				4410	4660			5400	7107				4135	2786		4012	3804	3518	3997		4325	4429	4135	4436		2488	2738				9	DLVVQR		PEP_FRAG_1	281	286	b3y5y6	3	6.2962	6.2962	0.0013	2	3	729.4245	6470.0
34482	729.4289	40.89	39.97	111.309																												3509	3193	3625	29	DLVVQR		PEP_FRAG_1	281	286	b3∞y1y6	3	6.0392	6.2962	0.0013	1	3	729.4296	2035.0
34486	728.4683	59.45	61.06	43.2328				3277	3410		4083	5008						2148	2240							2720	2199	2816							7	VIDLLR		PEP_FRAG_1	333	338	y4y5	2	6.8172	7.6978	0.0000	4	9	728.4678	2290.0
34500	729.4139	30.12	32.56	102.441				6185	5654	5538	4115			3080			3425		4992	8152	8493		9112	9193	11459	4474	2864	4615	5811	5732	6712				21	LKDPEK		PEP_FRAG_1	96	101	b5y1y2y3y3∞y4y6	7	6.4267	6.4267	0.0013	2	2	729.415	11578.0
34504	729.4073	37.76	39.85	43.9438				3426	3534		39201	32072		21198				16559								2759	2982	2882							14	NPVFPR		PEP_FRAG_1	132	137	b4	1	5.4266	5.5442	0.0020	2	3	729.4078	9108.0
34551	729.4622	44.94	46.71	109.803				8830	8757		9207	8442	8241		10221	11421					10883		13057	12466	13495	11037				9144					20	TQLLVR		PEP_FRAG_1	391	396	b3b3∞b6y6y6*	5	5.9964	5.9964	0.0015	1	2	729.4621	12281.0
34554	729.4284	37.13	39.0	111.284				4313	3309	4369	2715		4263	4043	4466	4433	2317	2381	4154	5352	5543	5314	3279	2972	3077	3646	3696	4363			2486				20	LNLQNK		PEP_FRAG_1	749	754	y3y5y6	3	7.2798	8.4154	0.0000	1	2	729.4299	2457.0
34558	729.4261	53.6	53.13	107.984																												21126	24711	25671	30	NNQLIK		PEP_FRAG_1	318	323	b6y3y6	3	6.2203	6.2203	0.0013	1	3	729.4257	19837.0
34564	729.4112	52.42	54.1	110.221						3325		4927		8365	10223	10860				6510		5247		6475	6282				9019	8657	10707				11	WPTAVR		PEP_FRAG_1	700	705	b3y3	2	6.0442	6.9073	0.0009	2	8	729.41	10254.0
34566	729.4536	55.63	55.19	40.6647	23377																											38825	42437	38311	29	LGLELGK		PEP_FRAG_1	23	29	b2b3b4y2y3y4y4∞y5y6y6∞	10	8.3191	8.7123	0.0000	4	30	729.455	34035.0
34567	729.4499	55.9	55.38	40.803		6933																													2	LGLELGK		PEP_FRAG_1	23	29	y2y5y6	3	6.0843	8.7123	0.0000	1	30	729.4499	6933.0
34568	729.4531	55.79	55.41	40.849			6596																												3	LGLELGK		PEP_FRAG_1	23	29	y2y3y4y5y6	5	6.8113	8.7123	0.0000	1	30	729.4531	6596.0
34569	729.4022	43.14	44.76	40.5249							2618	2668	2956					2402								7836	6535	5583							22	WPTAVR		PEP_FRAG_2	700	705	y4y5	2	6.9073	6.9073	0.0009	5	8	729.3999	5843.0
34612	728.4027	43.56	45.18	39.98		9707	9313	92226	85887	44330	67701	78843		84596	76485	91668		70867		78352		47365	92344	93470	87618	77383	66046	75462	80104	84112	80051	61167	63612	62165	11	FSAYIK		PEP_FRAG_1	114	119	b2b2∞b3b3∞b4b5y1y3y4y5y5∞	11	8.6037	8.6037	0.0000	24	26	728.3984	61974.0
34617	729.4893	26.7	25.85	38.2363			11957																									39619	38978	37632	29	IKEIVK		PEP_FRAG_2	203	208	b2b3b4y2y3y4y4∞y5y5∞y6	10	8.7472	8.7472	0.0000	2	7	729.4903	33781.0
34628	729.4527	53.22	54.82	40.5141				37060	40783	28208	41049	35512	32118	29370	26756	29077		37050	35920	35225	35782	36666	39566	43359	41786	43509	40940	42667	32783	39770	36379				17	LGLELGK		PEP_FRAG_1	23	29	b2b3b4b5y2y3y4y4∞y5y6y6∞	11	8.7123	8.7123	0.0000	23	30	729.452	74618.0
34629	729.4513	53.56	54.78	116.383													5797																		13	LGLELGK		PEP_FRAG_1	23	29	b4y4y7	3	5.8262	8.7123	0.0000	1	30	729.4513	5797.0
34633	729.4862	46.3	47.62	114.723													5995																		13	IKEIVK		PEP_FRAG_1	203	208	b4y3y6	3	7.6267	8.7472	0.0000	1	7	729.4862	5995.0
34637	729.4851	63.03	63.61	111.571						1406									1434			1444													18	ALTALLK		PEP_FRAG_2	259	265	y5∞y7	2	5.5977	5.9064	0.0016	2	5	729.4838	1750.0
34639	729.4878	35.27	37.4	39.9697				9217	10085	7682	6521	6086		14828	15491	15826		8270	6942	6213	4841		6790	6492	6781		2510	2954	6645	7499	6846				20	LLDLKK		PEP_FRAG_1	876	881	y4y5	2	7.5112	7.5471	0.0000	5	8	729.4895	6202.0
34653	730.3773	27.62	26.93	41.019																													2174		29	ETPQQK		PEP_FRAG_1	97	102	b2∞b5*y6	3	5.5924	5.5924	0.0019	1	2	730.3773	2174.0
34654	730.3747	27.64	26.69	41.351	1039																														1	ETPQQK		PEP_FRAG_1	97	102	b2∞y3*y6	3	4.6595	5.5924	0.0019	1	2	730.3747	1039.0
34655	730.3776	27.63	26.94	41.054																														2231	30	FATYTK		PEP_FRAG_1	356	361	b5y5y6	3	6.2753	6.2753	0.0013	1	3	730.3776	2231.0
34662	730.3656	30.73	29.98	38.303																												3731			28	GVFDHR		PEP_FRAG_1	405	410	b3y2y4	3	6.6201	6.8525	0.0011	1	5	730.3656	3731.0
34663	729.4887	38.92	38.08	39.782																												8193	7652	6646	28	LLDLKK		PEP_FRAG_1	876	881	y3y4y5	3	7.5471	7.5471	0.0000	3	8	729.489	6064.0
34664	730.3653	30.8	29.9	38.079																													3900		29	GVFDHR		PEP_FRAG_1	405	410	y2y4	2	6.8525	6.8525	0.0011	1	5	730.3653	3900.0
34668	729.46	39.44	41.58	42.8289												1784		3300		3160				1832			2058			1813	2156				27	TQLLVR		PEP_FRAG_1	391	396	y4	1	5.7972	5.9964	0.0015	1	2	729.462	1213.0
34670	729.4885	49.07	48.29	39.6655	36130	31946	35641																									27050	29239	29506	30	VASLLVK		PEP_FRAG_1	160	166	b3∞b4b4∞b5y2y3y4y5y6y6∞	10	8.1995	8.4509	0.0000	5	22	729.488	23176.0
34671	730.3643	29.63	32.3	103.061				1618			2022				4690	4668			2016		2977		2526	2374		1506									20	GVFDHR		PEP_FRAG_1	405	410	b3b6y6	3	5.8397	6.8525	0.0011	2	5	730.366	1957.0
34688	729.4885	30.16	31.9	42.3668								2425		3604				2543	3246		2735						3991	4527	2228	2515	2499	9273	8543	8842	8	IKEIVK		PEP_FRAG_1	203	208	b3b3∞	2	7.2098	8.7472	0.0000	3	7	729.4877	1330.0
34699	729.4516	51.09	52.6	41.2549				5279	4985	4967	3520	4043		2730	3231	3053			3476	4068	3291	3565	6206	5870	4457	6092	4802	5094	3343	3947	3064	6206		9002	23	INELLK		PEP_FRAG_1	189	194	y5	1	6.4855	7.1867	0.0006	3	14	729.4527	3068.0
34700	730.4219	32.2	31.3	40.7605	13268																											37725	39683	35863	29	TAGINVR		PEP_FRAG_1	490	496	b5∞y3y3*y4y5y6	6	7.9658	7.9658	0.0000	4	6	730.4218	32388.0
34701	730.3986	28.47	30.99	41.205								4928		3378				5406																	8	SFLHAR		PEP_FRAG_1	229	234	y3y4	2	6.8929	7.395	0.0003	3	6	730.3992	2688.0
34705	730.3985	32.86	32.03	41.012																														17367	30	SFLHAR		PEP_FRAG_1	229	234	b3∞y2y3y4y5	5	7.395	7.395	0.0003	1	6	730.3985	17367.0
34708	730.4222	32.3	31.61	40.939			2843																												3	TAGINVR		PEP_FRAG_1	490	496	b5b5∞y5y6	4	6.9066	7.9658	0.0000	1	6	730.4222	2843.0
34721	730.3884	36.82	39.07	37.721					1409																										5	GQAALDR		PEP_FRAG_1	95	101	b4	1	5.3802	5.9861	0.0015	1	4	730.3884	1409.0
34737	730.4263	36.02	38.16	39.685														2331																	14	YHIGIK		PEP_FRAG_1	110	115	b2b3y3y4	4	6.0203	6.0203	0.0015	1	3	730.4263	2331.0
34786	730.4474	54.07	55.79	115.334																	1673		1741		1529										21	NTIIAAK		PEP_FRAG_1	323	329	b3	1	5.305	5.9614	0.0015	1	3	730.4467	1131.0
34790	730.447	47.14	47.84	42.0591	46359	61365	57379	4053																		3804		4405	2806						2	LSELLR		PEP_FRAG_1	459	464	b3y1y2y3y4y5y5∞	7	8.1584	9.4951	0.0000	1	21	730.4456	19939.0
34792	730.447	45.65	47.23	42.1487														164356			185893	168650													18	LSELLR		PEP_FRAG_1	459	464	b3b3∞b4b4∞b5b6y1y2y3y4y4∞y5y5∞	13	9.198	9.4951	0.0000	3	21	730.4467	326478.0
34794	730.4302	57.14	58.29	42.238													12526																		13	LSELLR		PEP_FRAG_1	451	456	y4y5y5∞	3	8.0358	9.4951	0.0000	1	21	730.4302	12526.0
34797	730.4632	59.28	58.91	42.6092	11918	12495	11044																									8503	10280	10131	30	IPVVFR		PEP_FRAG_1	248	253	y3y4y5	3	6.9208	7.9301	0.0000	5	24	730.4641	7263.0
34799	730.4007	59.7	59.42	104.433																												2031			28	DLIVAEA		PEP_FRAG_1	334	340	b2b3b4b7	4	5.7408	5.7408	0.0017	1	5	730.4007	2031.0
34812	730.4021	61.89	61.89	107.656									6231																						9	DLIVAEA		PEP_FRAG_1	334	340	y3y3∞y7	3	5.1455	5.7408	0.0017	1	5	730.4021	6231.0
34818	730.4354	54.04	55.39	108.748				3609	5110	3837	3052	3077	3302	3805	5822	5116	3867	2544	4590	5553	5249	5240	4959	5412	6164	5240	4580	4356	4527	4133	4055	5164	6220	5026	6	EEIIVK		PEP_FRAG_1	321	326	b3b4y2y6	4	6.0933	6.0933	0.0016	6	6	730.4342	9822.0
34834	730.4281	33.36	35.14	110.424				11595	13309				22812	14109							29712	24104	11557			12173	12615	12019	13074	10557	12377	12773	15352		9	AVHLYK		PEP_FRAG_1	61	66	b3b4b5b6y2y3y6	7	6.5684	6.5684	0.0011	5	5	730.4258	25361.0
34845	730.4438	42.87	44.1	111.18				3042		3145	3588	3856	5045			6086							3185	3279	2549	3124						2082		2465	21	ELVTLR		PEP_FRAG_1	258	263	y3y6	2	6.2769	6.2769	0.0013	4	6	730.444	2016.0
34847	730.4462	59.35	59.27	109.299	8282	8986	6510			5928			4696				8762		8791													4014		4960	30	DILTLR		PEP_FRAG_1	163	168	y5y6	2	5.7176	5.7176	0.0017	2	2	730.4469	3142.0
34855	730.4888	77.47	77.98	117.276																												1055			28	FLIPLK		PEP_FRAG_1	660	665	b2b3	2	5.2107	5.6022	0.0019	1	5	730.4888	1055.0
34857	730.4883	77.48	77.82	116.794																														1180	30	FLIPLK		PEP_FRAG_1	660	665	b2b3	2	5.4721	5.6022	0.0019	1	5	730.4883	1180.0
34858	730.4855	77.01	77.35	117.638						2373			2022									1527													18	FLIPLK		PEP_FRAG_1	660	665	b2b3y3	3	5.6022	5.6022	0.0019	2	5	730.4841	1772.0
34885	730.435	62.15	62.88	114.339																	1221														17	DIEIIK		PEP_FRAG_1	592	597	b4y4	2	5.5886	5.5886	0.0022	1	2	730.435	1221.0
34887	730.4379	63.03	63.03	113.517						1598																									6	LDEILK		PEP_FRAG_1	441	446	b4b5b5∞y4y5	5	6.5727	7.0099	0.0007	1	7	730.4379	1598.0
34926	731.4321	31.28	30.43	40.191	21960	23229	20704																									48015	51198	52770	29	TELIQK		PEP_FRAG_1	4	9	b1b2b2∞b3b3∞b4y2y2*y3y4y5y5∞	12	8.7963	8.7963	0.0000	5	6	731.4328	42707.0
34927	731.4314	30.73	29.87	40.041																												9193	9292	9421	28	IAEALSK		PEP_FRAG_1	619	625	y3y4y5y6	4	7.2833	7.2833	0.0005	1	2	731.4304	7341.0
34930	731.4324	30.82	30.01	109.405																												6035	5788	6918	29	AAETVLK		PEP_FRAG_1	185	191	b3b4y2y7	4	6.0629	6.0629	0.0015	1	2	731.4337	4066.0
34931	730.4635	56.57	58.33	42.3935				13093	11746		14339	18707		2940	3967	3927		14338	13540	22829			14344	12083	13885	21081	19232	19418	14204	14637	14326				24	IPVVFR		PEP_FRAG_1	248	253	b3y3y4y5	4	7.9301	7.9301	0.0000	18	24	730.4646	16492.0
34936	731.4305	32.99	32.08	107.844																														1274	30	ELTQIK		PEP_FRAG_1	199	204	y4y6	2	6.2191	6.7336	0.0011	1	2	731.4305	1274.0
34944	728.3957	45.42	45.11	109.966									63252																						9	FSAYIK		PEP_FRAG_1	114	119	b2b2∞b3b3∞b4b4∞b5y1y2y3y4y5	12	8.3851	8.6037	0.0000	1	26	728.3957	63252.0
34949	730.4478	43.66	45.32	111.247				3461	3544	5305	2356	1978	5512				2257		4861	3339	5432	5659	5243	5686	5461		2792	3193	3352	3727	3069				16	NTIIAAK		PEP_FRAG_1	323	329	b3*y7y7*	3	5.9408	5.9614	0.0015	1	3	730.4488	2877.0
34971	731.466	40.25	39.55	42.06																												2207			28	TIGVITK		PEP_FRAG_1	200	206	y2y3y5	3	6.3469	6.3469	0.0013	1	5	731.466	2207.0
34982	731.4668	36.57	38.85	41.94				2032	2834		1790																								5	TIGVITK		PEP_FRAG_1	200	206	y3y5	2	6.1752	6.3469	0.0013	2	5	731.4673	1805.0
34984	731.4653	37.03	38.91	105.153								3773	2057		3217	3865							1376	2688	2698										21	TIGVITK		PEP_FRAG_1	200	206	b1∞y3y5	3	6.0549	6.3469	0.0013	1	5	731.4656	2210.0
34992	731.4061	44.75	43.69	108.133			1874																												3	DNTLIR		PEP_FRAG_1	271	276	y5y6	2	5.4097	7.1469	0.0006	1	4	731.4061	1874.0
34993	731.4054	44.75	43.66	108.87	2620																														1	DNTLIR		PEP_FRAG_1	271	276	y5y6	2	5.3047	7.1469	0.0006	1	4	731.4054	2620.0
34999	731.4067	46.3	46.3	105.373						4328																									6	DNTLIR		PEP_FRAG_1	271	276	b3b4	2	7.1469	7.1469	0.0006	1	4	731.4067	4328.0
35005	731.4075	38.26	40.15	108.357						2776	3044						4190	2587	4812					2509	2366	3143	2781	2709	1841	1731	1987				24	DNTLIR		PEP_FRAG_1	271	276	b3*y1y6	3	6.062	7.1469	0.0006	1	4	731.4052	1877.0
35014	731.4065	37.72	38.03	41.8002	34540	36474	35905	72270	75945																		80597			73231		59019	57406	55050	28	SELNLR		PEP_FRAG_1	22	27	b2b3b4b5y3y3*y4y4*y5y5∞	10	8.77	8.77	0.0000	10	26	731.4057	49350.0
35015	731.406	36.12	37.99	106.518						36100			74360	16535	48017	29361	44065	33341	33430	85167		37908	43189	74703	4643	87452		34874			35077				16	SELNLR		PEP_FRAG_1	22	27	b2b2∞b3b4b4*b5b5*y2y3y3*y4y5y5*y5∞y6*	15	8.756	8.77	0.0000	14	26	731.4068	118349.0
35016	731.4048	35.82	37.69	41.888																	172530														17	SELNLR		PEP_FRAG_1	22	27	b2b2∞b3∞b4b4*b4∞b5b5*y2y3y3*y4y5y5∞y6*	15	8.3582	8.77	0.0000	1	26	731.4048	172530.0
35019	731.4061	33.71	35.36	41.0056		8128	6112		8653	7548	7616	8164		8617	8011	7646	17118	8990		6186	8175	6996		6902		8249	8778	10072		7466	5468	7643	7990		6	LNIDTR		PEP_FRAG_1	98	103	b2y3	2	6.8027	6.8027	0.0011	4	5	731.4082	20430.0
35020	731.4674	52.78	52.38	112.817																												4886	4022	5740	29	AISLLSK		PEP_FRAG_1	58	64	b4b4∞y3y7	4	5.9271	6.5786	0.0011	2	9	731.4681	2593.0
35034	731.428	41.67	43.1	111.832				3106	2374	3107		2327	3647		2599	2387	2440		3466	4304	4309	4727	3970	4192	3697	3847	3701	4129	2716	2692	2695	3950	4679	4363	21	TEVALAK		PEP_FRAG_1	270	276	b4y7	2	5.387	5.387	0.0020	3	3	731.4285	2945.0
35038	731.4505	40.01	41.53	41.0672				13636	12895	12502		13685	11218	13292				27270	20010	15121	12451	12945						14645							18	IVVAMAK		PEP_FRAG_1	235	241	b2b3b4b5y2y3y4y5y6	9	8.5241	8.7529	0.0000	12	27	731.4499	21511.0
35040	731.4502	39.5	41.62	114.267							14570				18150	15770	17857						16387	16271	15787	15479	15785		15748	14326	16870				19	IVVAMAK		PEP_FRAG_1	235	241	b2b3b4b5y1y2y3y4y5y6	10	8.7529	8.7529	0.0000	12	27	731.4504	16019.0
35041	731.4496	42.77	41.92	113.609																												11111	12775	12735	29	IVVAMAK		PEP_FRAG_1	235	241	b2b3y1y2y3y4y5	7	8.1274	8.7529	0.0000	3	27	731.45	9620.0
35053	731.4671	50.24	51.85	113.449				3252	3469	3950	2932	2497	4130	3269	4721	3955	3458	2603	2981	3922	3559	3634	4320	3046	3335	4195		4007	2585	2960	2769				17	AISLLSK		PEP_FRAG_1	58	64	b2b4∞y2y3y4y5y7	7	6.5786	6.5786	0.0011	6	9	731.4668	5319.0
35101	731.4498	67.35	68.81	112.796				3813	2788	3741	1987	2262	3703	3996	4493	5196		5951	8748		4288	4001	4235	3831	4009	5275	4792	4814	2604	2953	2416				17	NIMLLK		PEP_FRAG_1	175	180	b2b4y4y6	4	7.1611	7.1954	0.0005	4	13	731.4481	6883.0
35105	732.3816	23.08	23.43	42.653																												1052			28	FQNAPR		PEP_FRAG_1	489	494	y4	1	5.5827	5.5827	0.0019	1	2	732.3816	1052.0
35114	732.3787	30.66	29.83	103.366																												4445			28	DEEVLK		PEP_FRAG_1	157	162	b3b3∞b4y2y3y6	6	7.7627	7.7627	0.0000	1	2	732.3787	4445.0
35115	732.4172	30.35	29.47	109.17																														1292	30	EIETLK		PEP_FRAG_1	1157	1162	y4y6	2	5.8697	5.8697	0.0016	1	3	732.4172	1292.0
35125	731.45	57.89	59.38	111.799				6966	4730		2852	3301		6463	6314	6922		3276		7060	5651	5734	7856	6269	5755	9058	9325	7196	8790	8380	6285	7011	8738	8826	19	NIMLLK		PEP_FRAG_1	175	180	b2b3y2y3y4	5	7.1954	7.1954	0.0005	8	13	731.4494	6535.0
35129	732.354	26.08	27.51	101.507	6533	4388	4327	3105	3031	5754		2030	3516				2330		3566	3029		6258				2437	2007	2563	2919	3152	2410	4987	3900	4278	1	DDIVDR		PEP_FRAG_1	116	121	y4y6	2	5.7057	5.9091	0.0015	1	4	732.3549	1661.0
35161	732.3393	40.06	41.97	107.611								5200																6418			5654				8	EVEENI		PEP_FRAG_1	419	424	y3*	1	5.1422	5.5154	0.0023	1	4	732.3408	2945.0
35178	731.449	50.92	52.3	40.5974				5256	4934	4255	5006	5459	3525	2578	3048	3329				4426	4761	4303	6489	5712	6371	3898	3097	2725	5976	6747	6721	2345	2494	2521	19	IQLVMK		PEP_FRAG_1	709	714	b2b2*y2y3y4y5y5*	7	7.8151	7.8151	0.0000	14	18	731.451	5467.0
35183	732.38	44.76	43.87	107.455																												2918			28	ELDDLK		PEP_FRAG_1	1618	1623	b4y4y6	3	5.7894	5.7894	0.0016	1	2	732.38	2918.0
35199	732.435	45.78	45.04	42.255																													4491		29	MLIVEK		PEP_FRAG_1	436	441	y5y5∞	2	5.7594	5.926	0.0016	1	2	732.435	4491.0
35205	732.4055	47.62	47.08	42.067																														2587	30	FPEALR		PEP_FRAG_1	262	267	y5	1	6.7851	6.7851	0.0011	1	5	732.4055	2587.0
35226	732.3559	46.4	47.65	104.605		7199	8638	10481	12385	15883	12747	12917	15891	5680	5791	5364	6812	8723	12210	8549	10282	10773	18303	15947	16178	21572	21049	19704	14817	14410	11722	12210	12370	12677	4	DDIVDR		PEP_FRAG_1	116	121	y4∞y6	2	5.0703	5.9091	0.0015	1	4	732.3569	7746.0
35245	731.4055	57.64	59.29	103.089				4256	3105	3802	2892	2809			2208		2841	2303		4359	4915	5463	4207	3871	3710	3735	3669	3442	3215	3104	2707				18	AATLAER		PEP_FRAG_1	40	46	b3y4y7	3	6.3225	6.4951	0.0011	1	5	731.4053	9665.0
35248	732.4426	54.11	55.73	43.794								1874						2419	3642							2614	2556	3695							8	LSPIFR		PEP_FRAG_1	469	474	y4	1	6.1141	6.1141	0.0015	3	8	732.4426	1105.0
35254	732.3981	57.43	58.52	109.136	7102	6194	6846	118023	110424	66652	105488	117522	69799	97783	106973	112348	66496	84428	95912	125617	102431	62278	128592	133607	134453	80667	72784	69257				81418	82505	88030	2	QLEMIV		PEP_FRAG_1	345	350	b5∞	1	4.1506	7.1581	0.0006	1	27	732.3984	1496.0
35267	732.4071	31.78	33.44	107.098				3705	3770	5286			4768				3635				3916		4944	5760	5918	5123	4767	4594	3809	3987	4982	5326	5818	6042	6	LWNATK		PEP_FRAG_1	953	958	y3y5	2	6.8836	6.8836	0.0010	1	3	732.4063	13407.0
35272	732.4073	44.55	46.38	41.9936					3151		3013	3550			1487			2599			3862	3414	3606	3139		3995	3272	6696			2764				23	FPEALR		PEP_FRAG_1	262	267	b2y2y3y5	4	6.7514	6.7851	0.0011	3	5	732.4077	2109.0
35282	731.3868	51.92	51.32	104.863	6800	6086	5432																									7451	7212	8224	28	DAWAIR		PEP_FRAG_1	237	242	b3b4y1y5y6	5	7.2092	7.2356	0.0005	2	11	731.3862	5450.0
35283	731.3902	47.89	49.47	106.55				5036	5124	4395	4618		4897				2720	3423						3035		5568	3782	5400	1988	2618	2456				24	DAWAIR		PEP_FRAG_2	237	242	y3y4	2	7.2356	7.2356	0.0005	5	11	731.3918	3866.0
35285	731.4211	48.72	50.35	39.5821				7985	8692	6749	6979	7233	5399		2982			5778	5623	6900	5622	5692	6831	7123		6431	7123	7949	5530	6350	5020				20	VGTLWR		PEP_FRAG_1	1392	1397	b5∞y1y2y3y4y5	6	7.6786	7.7262	0.0000	19	23	731.4236	6439.0
35289	732.3902	28.55	30.81	107.132				12887	12928		15411	15153		11594	9607	14586	11040	12003	17997	21800	19504	14406	17794	16281	19591	11314	11953	13379	12315	12546	12800	14834	12667	13574	18	DDINKK		PEP_FRAG_1	515	520	b3b6y3y3*y6	5	6.6064	6.6064	0.0011	1	2	732.3888	19572.0
35290	731.4301	47.44	49.21	109.054														2971	4695				2233		2220			1915		2284					19	TELIQK		PEP_FRAG_1	4	9	b3	1	6.9087	8.7963	0.0000	1	6	731.4293	1702.0
35295	731.456	32.9	32.09	41.7957	9618	7833	8325																									9783	9550	10335	28	FRPAIK		PEP_FRAG_1	126	131	b1b2b3b4	4	6.9492	6.9492	0.0008	5	5	731.4563	7705.0
35296	731.4197	51.71	51.23	39.289																														6936	30	VGTLWR		PEP_FRAG_1	1392	1397	y1y2y3y4y5y5∞	6	7.4785	7.7262	0.0000	1	23	731.4197	6936.0
35298	731.388	47.65	49.48	40.769								1056																							8	DAWAIR		PEP_FRAG_1	237	242	y3y4	2	6.8868	7.2356	0.0005	1	11	731.388	1056.0
35303	732.4055	49.81	51.5	107.75				5856	8678	10728		4645						5847	2683	7038	4834	6882	4109	4067	4596	4064	4383	6095	2928		3130				17	AMELIR		PEP_FRAG_2	6	11	b3b4y6	3	6.0305	6.0305	0.0016	2	2	732.404	8096.0
35309	732.4315	52.13	53.89	41.9188				13949	13999		11433	9815		11111	12619	13105		9607	12743	13777	16569	16350	11246	13461	12210	16509	15602	14610	12532	12340	12077				20	FPVEIK		PEP_FRAG_1	440	445	b4y2y3y5	4	7.6982	7.6982	0.0000	11	11	732.4305	12618.0
35311	731.4226	51.68	51.23	39.588																												5978			28	VGTLWR		PEP_FRAG_1	1392	1397	y1y3y4y5y5∞	5	7.7262	7.7262	0.0000	1	23	731.4226	5978.0
35401	732.4773	69.52	71.08	43.2502				1614											1780	1953			1590				1728	1922							16	FLALLR		PEP_FRAG_1	729	734	y4y5	2	6.676	6.676	0.0011	6	12	732.4793	1624.0
35414	732.4071	79.12	80.6	107.509				3917	3700	5930	3421	3242	2607	4086	5151	5602	2650			3969	6133	5075		4854	4766				4886	4972	3959				6	MELALR		PEP_FRAG_1	1	6	b5y6	2	5.0837	5.0837	0.0028	2	2	732.4086	12995.0
35438	733.3745	26.65	25.85	106.008	9323	8578	9699																									12576	11464	11128	30	SEEQLK		PEP_FRAG_2	405	410	b4b5y2y3*y6	5	7.0324	7.0324	0.0006	2	2	733.3746	9354.0
35446	733.3924	32.77	31.99	40.8112	19362	20380	20176																									36024	35952	35839	30	MAALEAK		PEP_FRAG_1	10	16	b2b3b4b5y2y3y3∞y4y5y6	10	8.755	8.755	0.0000	6	10	733.393	29246.0
35456	732.3983	72.61	73.96	110.716				12791	11719	13344	9700	10198	3261	7799	9730	10344	9889	11190	9206	9920	10612	10267	14154	13903	12393	15112	14580	13856	15707	15751	15162	16292	17178	18303	21	QLEMIV		PEP_FRAG_1	345	350	b2*b3b3*b3∞b4b4∞y2	7	7.1581	7.1581	0.0006	26	27	732.3979	11898.0
35458	733.3887	32.0	34.1	106.072					2705		3623		5928				4117			4489			3751				4335	4293	3271						19	VWVSDK		PEP_FRAG_1	288	293	b2b4y3y4y6	5	7.0672	7.0672	0.0006	4	5	733.3892	2976.0
35464	733.3986	33.29	35.21	40.045						4950													3806		4364				2893						6	FLGSGPR		PEP_FRAG_2	344	350	b2y4∞y5y6	4	7.209	7.209	0.0005	3	5	733.4003	12627.0
35471	733.4127	35.74	37.45	40.113													51098																		13	ICIVTK	Carbamidomethyl C(2)	PEP_FRAG_1	223	228	y3∞	1	6.6617	6.6617	0.0011	1	2	733.4127	51098.0
35488	733.3941	40.26	39.41	39.6795		5243																										4602	4528	4925	30	LGVEMGK		PEP_FRAG_1	42	48	y3y4y6	3	7.1248	7.1248	0.0006	4	15	733.3929	3173.0
35497	733.4015	43.89	45.44	40.1617							2054	1865	4036								3005					2689	2457	2622							17	FLGSGPR		PEP_FRAG_1	344	350	y5y6	2	6.6152	7.209	0.0005	1	5	733.4015	3753.0
35511	733.3922	47.64	49.65	41.9483							5210									4333			3756		3486		4601			3374					16	NFDIPK		PEP_FRAG_1	207	212	y2y3y4	3	6.4646	6.9681	0.0007	1	6	733.3926	4005.0
35513	733.3905	49.9	49.69	108.339									16259																						9	NFDIPK		PEP_FRAG_1	207	212	b2b2*b3b3*b4y2y3y4y6	9	6.9681	6.9681	0.0007	1	6	733.3905	16259.0
35551	733.434	70.78	71.01	36.3697																												2131	1920	2211	28	MLQTLK		PEP_FRAG_1	576	581	y3∞y6	2	5.2342	5.6216	0.0022	1	2	733.4315	1521.0
35571	733.4626	63.24	63.1	113.234																												5672	8715	9290	29	ALAAFLK		PEP_FRAG_1	17	23	b3b4b5y2y4y5y6	7	7.884	8.3464	0.0000	2	22	733.4622	6362.0
35588	733.3495	56.08	57.1	99.2106		11402	11735	1584	1881	2983	8019	7357	11971				3678	2852	6104	2483	3161	3675				3927	3640	3203	6075	4981	4889	6364	7174	6137	17	DIDWGK		PEP_FRAG_2	694	699	y3y5y6	3	5.4618	5.8627	0.0016	4	5	733.3485	4518.0
35606	734.3644	25.13	24.56	39.7104		15667	19705																									5617	4863	8977	30	SGMNVAR		PEP_FRAG_1	67	73	y3y4y4*y5	4	8.371	8.371	0.0000	5	6	734.3634	7528.0
35622	733.4012	61.33	62.83	108.371				108698	100120	132432	103192	100707	163153	67320	72475	74417	107058	73492	97527	112378	115953	122263	90356	89828	81782	114074	111670	108626	121482	112288	113196				8	SWTALR		PEP_FRAG_1	6	11	b4b5b6y1y2y6	6	5.3175	5.3175	0.0021	2	2	733.402	81413.0
35628	733.4625	60.9	62.68	41.0592				7913	7682											9905								5834							16	ALAAFLK		PEP_FRAG_1	17	23	b2b3b4b5y3y4y5	7	7.7575	8.3464	0.0000	4	22	733.4631	10709.0
35629	733.4628	61.21	62.71	113.947						6158	11324	12096	9834	3352	2303						8698	8126	12752	13632	12397	5594	5726		23878	24997	23488				27	ALAAFLK		PEP_FRAG_1	17	23	b2b3b4b5y3y4y5	7	8.3464	8.3464	0.0000	16	22	733.4631	13724.0
35630	733.4596	55.03	56.68	39.968				9126	10100	6827	11433	10965	9967	4928	6655	6162		8523		11695			9269	8855	9610	8857	8652	9474	9678	10026	10023				26	FLGGLVK		PEP_FRAG_1	665	671	b2y5	2	6.1622	6.1622	0.0014	3	7	733.4601	6464.0
35651	733.3938	37.11	38.53	108.6	7908	5076	5872	12952	13026	11879	9588	9583		14217	15090	15940	7595		9334	17776	15695	14508	16233	14574	15737	20503	18715	16692	16528	16865	16019	13567	11858	13986	19	DVMLQK		PEP_FRAG_1	294	299	b2b3b4y2y3y4y6	7	6.6179	6.6179	0.0011	3	3	733.3934	15932.0
35652	733.3937	36.84	38.89	39.5851				3415	3795		3379	4050	2862		3948			2834	3338	4260			4530	4062	4241	5090	5698	5330	4010	4187	3779				16	LGVEMGK		PEP_FRAG_1	42	48	b2y2y3y4y4∞y6	6	7.1087	7.1248	0.0006	9	15	733.3937	4341.0
35654	734.4098	38.42	40.85	110.907																1473															16	NLSTATK		PEP_FRAG_1	147	153	y6∞	1	5.2549	5.7584	0.0016	1	2	734.4098	1473.0
35662	733.3998	35.57	38.02	40.7683																3916						5702	5146								22	GAPSFVR		PEP_FRAG_1	193	199	y3	1	4.8466	5.6432	0.0018	1	4	733.4001	4119.0
35663	734.3524	30.39	29.51	42.8165	28483	24654	22767																									25208	19312	20532	30	MEEIGR		PEP_FRAG_1	669	674	y1y2y3y5y5∞	5	8.1703	8.1703	0.0000	5	8	734.3522	16887.0
35675	734.3559	29.23	31.68	101.573				2199	2322		2343	2376	3277		1496		2143		3401	3857	4141	4245	3998	4025	4703	4278	4552	4669	2149		2471				22	EESLEK		PEP_FRAG_1	753	758	b3y6	2	4.6959	4.9229	0.0029	1	2	734.3573	2947.0
35680	733.4457	37.79	37.74	40.3057	16435		15035															61416													3	SLVSVTK		PEP_FRAG_1	532	538	y4y5	2	7.6997	9.4103	0.0000	2	29	733.4447	3591.0
35681	733.4469	35.88	37.57	110.17				273323	276806	321266	257999	248928	276237	223672	252817	278803	217933	202723	245175	232619	254024	190448	303182	317120	303134	270411	251580	238898	262551	238730	253526	280282	282790	269914	20	SLVSVTK		PEP_FRAG_1	532	538	b2b3b3∞b4b4∞b5∞b6b6∞b7b7∞y1y2y2∞y3y3∞y4y4∞y5y5∞y6	20	9.4103	9.4103	0.0000	27	29	733.4483	370822.0
35687	734.3827	40.9	42.26	104.648					2130	3868			3876			2049	2604		4562	2752	3868	3568	2835	2573		2385		2256	3111	1839			3104	2044	9	QVAGTMK		PEP_FRAG_1	428	434	b7*y3y5y7	4	6.0705	6.0705	0.0016	1	2	734.3844	3743.0
35689	734.4074	44.18	45.42	40.6987				1581		2098									1782			2076													6	LITMEK		PEP_FRAG_1	410	415	y4y4∞y5	3	6.1588	6.1588	0.0014	1	2	734.4105	2915.0
35700	734.4209	38.45	40.34	37.4343				15494	16179	13781	16198	15163	16257	17904	24013	26433		24673	26164	16905	17022	16515	13670	14179	13798	17741	19048	16766	13718	13562	14394				12	AAQLGFK		PEP_FRAG_1	60	66	b2b3b5y2y3y4y5y6y6*y7*	10	8.0665	8.0665	0.0000	20	27	734.4226	29650.0
35706	734.4051	52.85	52.44	42.1867																												7343	11314	8263	29	APIFMR		PEP_FRAG_1	73	78	y3y5	2	7.1089	7.1089	0.0006	3	22	734.4065	8514.0
35712	734.4214	50.56	49.93	106.491	127727	127154	146633																									169218	161731	167039	29	NVNIFK		PEP_FRAG_1	113	118	b2b2*b3b3*b4b4*b5b5*b6*y1y2y3y4y4*y5y6*	16	8.9016	9.0727	0.0000	6	30	734.4224	136261.0
35723	734.3668	35.33	37.04	100.949				19682	19467	28510	13844	13695	19439	17125	18026	17101	14608	14467	18777	33227	27881	26728	28042	25860	28898	28164	25675	24759	26744	25237	25080	27965	28290	26344	20	SGMNVAR		PEP_FRAG_1	67	73	y1y4y7	3	7.3385	8.371	0.0000	1	6	734.367	27421.0
35749	734.4459	65.7	65.68	41.56																													1907		29	LFDLVK		PEP_FRAG_1	693	698	b3y4y5	3	6.2774	6.7618	0.0011	1	15	734.4459	1907.0
35750	734.446	65.68	65.6	41.638																														1796	30	LFDLVK		PEP_FRAG_1	693	698	b3y5	2	6.3303	6.7618	0.0011	1	15	734.446	1796.0
35756	734.4471	68.42	68.45	111.796	21784	18076	18788																									104362	107965	113501	30	DVLFLK		PEP_FRAG_1	92	97	b2b3b4b5y1y2y3y4y5	9	8.6315	9.0275	0.0000	5	29	734.4477	95569.0
35757	734.42	54.82	56.43	110.887				2315	2201	3252	2204	1958					2792		3073	2833	3226		2541	2464		2955	2566	2791	2175	1866	2147				8	AAQLGFK		PEP_FRAG_1	60	66	y3y7	2	6.3099	8.0665	0.0000	1	27	734.4221	1159.0
35763	734.4045	49.7	51.51	42.1555				8047	6788					4061	6448	5132		3663	3098	4414	3384		6771	5824	6347	5854	4727	5043	4664	6690	5630				21	APIFMR		PEP_FRAG_1	73	78	y3y4	2	6.795	7.1089	0.0006	18	22	734.4037	5399.0
35777	734.4212	47.66	49.32	106.699				213504	191640	157594	195969	189943	223826	139198	157835	151304	156875	145793	120358	174200	153490	187909	203662	198347	213956	198460	204905	182008	178069	181848	173342				16	NVNIFK		PEP_FRAG_1	113	118	b2b2*b3b3*b4b4*b5b5*b6*y1y2y3y4y4*y5	15	9.0727	9.0727	0.0000	23	30	734.4216	230493.0
35778	734.4223	47.97	49.24	41.014															54076																15	NVNIFK		PEP_FRAG_1	113	118	b2b2*b3b3*b4y1y2y3y4y4*y5	11	8.7824	9.0727	0.0000	1	30	734.4223	54076.0
35784	734.447	63.64	65.29	41.3708				2355	2461	2398	2045	1896			2347	2339			2115	1881			2806		2837	2473	2473	2325	1692	2320	2024				6	LFDLVK		PEP_FRAG_1	693	698	y3y4y5	3	6.7618	6.7618	0.0011	13	15	734.4466	3581.0
35790	735.4299	23.51	23.62	41.046																														4818	30	HPNIVR		PEP_FRAG_1	60	65	b2y4y4*y5	4	6.7794	6.7794	0.0011	1	3	735.4299	4818.0
35791	735.4288	23.51	23.82	41.154																													5277		29	HPNIVR		PEP_FRAG_1	60	65	y4y5y6	3	6.4791	6.7794	0.0011	1	3	735.4288	5277.0
35800	735.3803	30.0	29.11	42.76	13265	12170	10110																									8207	8842	7907	2	FQDAVR		PEP_FRAG_1	376	381	y4y5	2	7.3276	7.3276	0.0004	3	3	735.3808	3117.0
35814	735.4054	35.64	34.81	38.779																												45570			28	TTWVTK		PEP_FRAG_1	511	516	b2b3b3∞b4b4∞b5b5∞b6b6∞y2y2∞y3y4y5y5∞	15	8.5667	8.5667	0.0000	1	20	735.4054	45570.0
35815	735.4046	35.71	34.85	103.352																														39468	30	TTWVTK		PEP_FRAG_1	511	516	b2b2∞b3b3∞b4b5y2y2∞y3y4y5y5∞	12	8.0393	8.5667	0.0000	1	20	735.4046	39468.0
35816	735.4062	35.71	34.81	38.83																													42935		29	TTWVTK		PEP_FRAG_1	511	516	b2b3b3∞b4b4∞b5b5∞b6y2y2∞y3y4y5y5∞	14	8.5598	8.5667	0.0000	1	20	735.4062	42935.0
35818	735.4263	32.02	33.91	39.2313				8957	8514	7726		6830		8493				13601	14081	9282	8196	8651	10095	10982	12408	10062	11625	10648		6038	4957	5848	4343	5420	21	LSLSTSK		PEP_FRAG_1	426	432	y2y3y5y6	4	7.8817	7.8817	0.0000	17	21	735.4262	12640.0
35819	735.4254	31.93	33.85	111.091							7016		7885		10734	11720	8350																		11	LSLSTSK		PEP_FRAG_1	426	432	b4b7y3y5y6y6∞	6	7.4543	7.8817	0.0000	4	21	735.4259	11672.0
35821	734.4464	66.47	67.81	111.973				211593	197699	201173	223416	220941	62387	90658	96874	103287	181421	150825	206228	190469	238233	233982	219308	159008	171776	235146	214889	199958	162097	170677	173426	2647	2294	2363	12	DVLFLK		PEP_FRAG_1	92	97	b2b3b4b5y1y2y3y4y5	9	9.0275	9.0275	0.0000	24	29	734.4478	118927.0
35826	734.4217	42.18	41.34	37.4098	29296	33669																										12619	12866	12649	28	AAQLGFK		PEP_FRAG_1	60	66	b3y3y4y5y5*y6	6	7.6771	8.0665	0.0000	4	27	734.4205	9875.0
35829	734.4137	40.11	41.76	40.8034				23602	22386	12981	24752	25704		13792	14308	15381		22565	13796	19861	14166	17275	20799	17068	18036	11107	7955	7040					5746	7839	30	LITMEK		PEP_FRAG_1	410	415	y4y5	2	6.0591	6.1588	0.0014	1	2	734.4133	5528.0
35833	734.4187	42.28	41.6	37.477			8104																												3	AAQLGFK		PEP_FRAG_1	60	66	y3y4y5y5*y6	5	7.232	8.0665	0.0000	1	27	734.4187	8104.0
35836	735.4054	31.74	34.21	38.8026				4785	15419									13927		6482				2671		34925		23331		8757					16	TTWVTK		PEP_FRAG_1	511	516	b3b4∞b6b6∞y2y3y4y5	8	8.0828	8.5667	0.0000	6	20	735.4057	7622.0
35837	735.4045	32.01	34.18	103.902							15411	20030	3125		12210	17283	11550								4019		24409		4138		29893				11	TTWVTK		PEP_FRAG_1	511	516	b3b3∞b4b4∞b6y2y3y4y5y5∞	10	7.7771	8.5667	0.0000	9	20	735.4039	13455.0
35839	735.3891	36.58	38.76	44.0981				7020	8848		8339	8899						5920								4858	5021	4971							24	VTSAETK		PEP_FRAG_1	265	271	b3b5∞y6	3	4.4759	5.5214	0.0020	1	3	735.3881	3614.0
35841	735.4059	42.8	41.55	110.673	29025																														1	MSGTIVK		PEP_FRAG_1	229	235	b5b5∞y1y2	4	5.6584	5.6584	0.0016	1	2	735.4059	29025.0
35843	735.3797	39.31	41.23	109.225				3705	2822	3900					1854	2041							4245	4665	4104										11	MLSAASR		PEP_FRAG_1	1	7	y5y7	2	6.4113	6.6818	0.0011	1	5	735.384	1470.0
35846	735.4167	30.4	32.91	44.2959				3303	5826									3693								5363	4925	5952	2406	3100	5228				27	QIYVGR		PEP_FRAG_1	260	265	y3y4	2	7.4405	7.8447	0.0000	4	6	735.4163	2916.0
35849	735.4174	30.29	32.9	106.261							8376	9551			5501	5836	3821			1928															8	QIYVGR		PEP_FRAG_1	260	265	b1b4y2y3y4y5	6	7.8447	7.8447	0.0000	2	6	735.4174	5746.0
35863	735.3335	37.24	38.9	102.648				3401	3798	3785	1946	2496	3240		2936				3401	4724	4390	3858	3667	3883	3365	4111	4263	4585	2488	2479	3206	2452		2493	5	DVGMADK		PEP_FRAG_1	120	126	b4y3y7	3	5.0542	5.6702	0.0017	1	3	735.3343	2419.0
35865	735.4144	42.92	44.37	41.036					1664	2233			2859			1350			1896	1370	1558		1620	1342											6	TAFQIR		PEP_FRAG_2	955	960	b2y4y5	3	6.4205	6.4205	0.0013	5	7	735.4127	3305.0
35866	735.3451	31.67	33.96	103.938				1945		2947	2121	2000					1731			3740	4012	4473	3632	3701	4513		2384	2774	3230		2303				19	DQPYGR		PEP_FRAG_1	340	345	y4y6	2	5.8967	5.8967	0.0016	2	2	735.3433	2881.0
35867	735.4406	48.77	48.14	106.837																												8049	6764	7909	28	TIFLNK		PEP_FRAG_1	415	420	b2b5y2y4y6	5	7.2493	7.9803	0.0000	2	5	735.4401	5948.0
35868	735.4054	49.61	48.98	112.229																														8593	30	DAFALAK		PEP_FRAG_1	270	276	b3b4y2y3y4y5y7	7	7.3679	8.0692	0.0000	1	25	735.4054	8593.0
35875	735.3572	45.36	46.43	104.93				2074	1595	3420			4803										3270	3269	2675	2864	1994		2214			2353	2198	2083	22	AWMAEK		PEP_FRAG_1	193	198	y3∞y6	2	5.4206	6.1737	0.0014	1	6	735.3558	1844.0
35891	735.3515	33.65	36.13	105.098																				1366											20	AWMAEK		PEP_FRAG_1	193	198	y2∞y4y6	3	6.1737	6.1737	0.0014	1	6	735.3515	1366.0
35893	735.3364	47.23	48.8	104.8				2338	1933		2228				2658	1933				2138		3384			2913	2036	2138		2640				2894	2740	18	NPNYDL		PEP_FRAG_2	903	908	b2b3b3*b4*y5y5*	6	6.5122	6.5122	0.0011	5	5	735.3348	4629.0
35896	735.3887	42.02	43.99	42.1222				12594	14622		20340	18411			2440	2142		9509	14114	9025	8179	7653	11824	12631	10683	5683	5721	6555							21	VTSAETK		PEP_FRAG_1	265	271	b3b6y4	3	5.5214	5.5214	0.0020	1	3	735.3875	10233.0
35905	735.4264	33.4	35.68	41.8245										3924	4894	4665		2219																	11	HPNIVR		PEP_FRAG_1	60	65	b3y5	2	6.3869	6.7794	0.0011	1	3	735.4277	4513.0
35910	734.421	55.67	57.01	108.053				25669	23566	22672	20467	18911	23361	21951	24140	29542	19966	16514	21309	27173	24291	23132	27623	25232	26360	25000	27567	20892	26126	24028	24845	2787	2636	2959	16	LEVFAR		PEP_FRAG_1	60	65	b4b5y3	3	5.0568	5.9047	0.0016	1	2	734.4209	32038.0
35936	735.4416	42.37	43.83	111.404				9243	8248	7995	6660	7223	6685	5787	7486	7980	9546	8497	9347	9413	9626	8248	9282	8951	8672	8527	8662	8459	8834	7387	7635	6282	7221	7288	20	GYIGVVK		PEP_FRAG_1	719	725	b3b5y2y4y5y7	6	7.6604	7.6604	0.0000	24	24	735.4419	8706.0
35948	735.4052	34.58	34.58	103.369						93747																									6	TTWVTK		PEP_FRAG_1	511	516	b1b2b3b3∞b4b6b6∞y1y2y2∞y3y3∞y4y5	14	8.2038	8.5667	0.0000	1	20	735.4052	93747.0
35950	735.4056	46.88	48.53	112.885				19970	18677	19542	20859	20133	11550	17895	20935	22431	16077	12050	12741	18349	16999	14984	24044	21690	23153	17155	16477	16018	20642	21035	19317				12	DAFALAK		PEP_FRAG_1	270	276	b2b3b4b5y1y2y3y4y5	9	8.0692	8.0692	0.0000	24	25	735.4066	23796.0
35991	735.4055	55.95	57.3	112.256				13042	13880	10127	11379	11347	9146	15808	18032	18855	7548	8438	10256	17994	11320	15919	13353	12639	12367	14453	14106	11162	18614	15264	17056	10948	10727	11387	19	SIVGMTK		PEP_FRAG_1	212	218	b3∞b4∞	2	4.8518	6.1026	0.0015	1	9	735.4058	11778.0
35997	736.3927	31.55	31.55	39.165						18829																									6	LKPESY		PEP_FRAG_1	464	469	b3y2y4y5∞	4	6.6325	6.8525	0.0011	1	7	736.3927	18829.0
36009	735.4055	44.6	45.82	110.515	18900	15935	14487	18367	17152	18968	16145	15709	18320	9564	8642	8798	13371	10769	17304	21293	21977	21743	25711	25922	24718	18041	18391	18072	23163	20061	22354	15521	15486	15899	19	VVDQFK		PEP_FRAG_1	500	505	b2b3b4b5y2y3y4y5y6	9	6.9997	6.9997	0.0007	4	4	735.4056	25294.0
36010	735.4147	43.57	45.3	108.606				3516		3280	3155	2739	2940		4928	4314	4323	2363		4807	3764	3844	2908	3162	2829	3437	4132	2796	2480	2569	2394				12	TAFQIR		PEP_FRAG_1	955	960	y5*y6	2	4.789	6.4205	0.0013	1	7	735.4163	3467.0
36043	736.3979	40.66	42.99	42.328																1053															16	SFEVVR		PEP_FRAG_1	216	221	y3y4	2	6.1053	6.4911	0.0011	1	6	736.3979	1053.0
36049	736.3331	29.61	31.81	105.33				3263	3765		5796	4432				3496	4933	3881	3024	9233						9186	5848	10131	2972	3782	4835		2771	5703	24	SDMDLR		PEP_FRAG_1	286	291	y2y3y4y5	4	6.7062	6.7062	0.0011	4	5	736.3324	8559.0
36064	736.4228	32.81	32.81	108.217						3666																									6	VVEYVK		PEP_FRAG_1	119	124	b2b3∞b4y3y4y6	6	6.4754	6.4754	0.0012	1	4	736.4228	3666.0
36075	736.4255	40.81	42.59	111.738				11168		9360	11698	11005	8895	4193	4951	5240	5543	7919		12688			13229	12165	12253	13312		12923	12418	10679	11530				16	AELLYK		PEP_FRAG_1	438	443	b2b3b4y2y3y4y5	7	7.9091	7.9091	0.0000	17	22	736.4267	15067.0
36079	736.4245	43.8	42.95	39.426																												8296			28	AELLYK		PEP_FRAG_1	438	443	b3b4y2y3y4y5	6	7.5488	7.9091	0.0000	1	22	736.4245	8296.0
36081	736.4253	43.84	43.01	111.412																													8075		29	AELLYK		PEP_FRAG_1	438	443	b2b3y3y4y5	5	7.5301	7.9091	0.0000	1	22	736.4253	8075.0
36083	736.4226	43.81	43.0	111.359																														8825	30	AELLYK		PEP_FRAG_1	438	443	b2b3y3y4y5	5	7.0826	7.9091	0.0000	1	22	736.4226	8825.0
36090	735.4416	46.13	47.56	107.269				7005	6905	5731	8033	7130	6679	4199	5640	5651	7600	5217	7130	8407	7170	7023	8012	8280	7536	7902	8029	7388	6511	6021	6661	4093	3545	4965	21	TIFLNK		PEP_FRAG_1	415	420	b2b3y2y3y4y6	6	7.9803	7.9803	0.0000	2	5	735.4414	6764.0
36093	736.4256	54.85	56.11	39.8452									2596						1626	1889								1696			2192				16	IDFLTK		PEP_FRAG_1	107	112	y2∞y5	2	6.8379	7.3626	0.0004	1	2	736.4235	1584.0
36113	736.4302	45.69	47.54	40.0777				10747			9317				6945	7561		11683	8618	10326	10952	10539		9693		11210	11065	12792	7890	8430					18	ILFSEK		PEP_FRAG_2	414	419	b3y1y3y4y5	5	7.5064	7.5064	0.0001	12	19	736.4299	18523.0
36114	735.3955	57.22	58.43	110.503					11273	9423	9104	10377	7245	7883	6740	7099	8473	7914		12948	10455	9884				11763	12178	9822				5378		6050	22	GGLFWR		PEP_FRAG_1	2	7	b4y6	2	4.7869	4.7869	0.0030	2	2	735.396	8739.0
36121	736.4241	48.79	48.13	112.543																														1893	30	ILFSEK		PEP_FRAG_1	414	419	b2y3y4y5y6	5	7.4505	7.5064	0.0001	1	19	736.4241	1893.0
36123	736.4256	40.43	42.54	39.232					7621																										5	AELLYK		PEP_FRAG_1	438	443	b2b3b4y4y5	5	7.1626	7.9091	0.0000	1	22	736.4256	7621.0
36124	736.4277	40.36	42.55	39.19																							10882								23	AELLYK		PEP_FRAG_1	438	443	b2b3y2y3y4y5	6	7.1146	7.9091	0.0000	1	22	736.4277	10882.0
36143	736.4243	46.19	47.57	112.8					3082	3210		2663	4288				5347						3965		3312						2673				21	ILFSEK		PEP_FRAG_1	414	419	y1y2y3y4y6	5	7.2644	7.5064	0.0001	2	19	736.4233	2558.0
36144	736.3825	34.3	36.47	40.2378				8843	10649		16483	14939	13705	9495	17275	17427		10917	5522	11652	6006	7231	16764	17455	17576	13163	14134	14654	11423	10103	11848				9	IPYGMR		PEP_FRAG_1	1156	1161	y2y5	2	6.5452	6.5828	0.0011	1	4	736.3818	15728.0
36146	736.4001	34.71	36.5	109.917				2178		3003			4910		4249		4747	2449		3452	2906		3091			2665		2573							22	VYEIGR		PEP_FRAG_1	315	320	b3y6	2	5.9123	6.6906	0.0011	3	7	736.401	1806.0
36148	736.3881	35.61	37.01	104.943									8809		6066																3465				11	FEALEK		PEP_FRAG_2	192	197	b2b3b4b6∞y3y4y4∞	7	6.7113	7.3829	0.0004	2	14	736.3899	5903.0
36150	736.4042	37.73	36.79	41.9017																												4380	2994	4042	28	VYEIGR		PEP_FRAG_1	315	320	y4y5	2	6.6906	6.6906	0.0011	2	7	736.4042	2924.0
36151	736.3825	35.17	36.93	105.369													2003																		13	FEAELK		PEP_FRAG_1	205	210	y4y6	2	5.333	6.4404	0.0013	1	2	736.3825	2003.0
36157	736.3902	67.25	68.43	109.51	39344	37476	37374	18588	17256	17157	24768	24485	5793	4769	6437	6473	24589	20013	22689	25536	24507	24069	30976	22582	23730	31424	27241	24340	22485	23948	21173	14681	15774	17232	18	DYLAAIA		PEP_FRAG_1	228	234	b2b3b4b4∞b5b5∞y2	7	8.183	8.183	0.0000	30	30	736.3887	49048.0
36158	736.4212	61.96	61.8	41.741																													1715		29	FGIIMR		PEP_FRAG_1	156	161	y3	1	5.2804	6.2174	0.0013	1	14	736.4212	1715.0
36159	736.4204	61.94	61.81	41.72																														1712	30	FGIIMR		PEP_FRAG_1	156	161	y3y5	2	6.0232	6.2174	0.0013	1	14	736.4204	1712.0
36162	736.3906	28.96	31.15	39.0829				3717			6489	4473			2992	3401		6392		3998			3654	3976	4257	3573	3365	4039			2026	5646		4229	28	LKPESY		PEP_FRAG_1	464	469	y4y5	2	6.8525	6.8525	0.0011	5	7	736.3897	4145.0
36164	736.3867	32.01	30.92	105.578																													1158		29	LKPESY		PEP_FRAG_1	464	469	y4y6	2	6.1563	6.8525	0.0011	1	7	736.3867	1158.0
36166	736.4616	62.6	62.58	42.5023																												6402	3986	7144	28	YLLSLK		PEP_FRAG_1	538	543	b2b4b4∞y3y4y5	6	6.9044	6.9825	0.0007	3	18	736.462	4665.0
36171	736.4246	72.14	73.37	109.806				1576		2460			1623				4333	3330	5669	2738	3551	3649	4059	4108	4027	4358	4203	3365	2705	2796	2200	3878	3615	4578	9	ILFSEK		PEP_FRAG_1	414	419	y4	1	5.9549	7.5064	0.0001	2	19	736.4245	1984.0
36174	736.5109	47.97	47.41	42.209																												13298	14744	13922	30	IIIHLK		PEP_FRAG_1	253	258	y3y4y5	3	7.9551	8.0612	0.0000	3	24	736.5098	10494.0
36184	737.3581	24.79	24.06	39.162			12773																												3	TAENFR		PEP_FRAG_1	32	37	b2y2y3y4y5	5	7.7511	8.7048	0.0000	1	11	737.3581	12773.0
36185	737.3595	24.88	24.07	39.166		11670																													2	TAENFR		PEP_FRAG_1	32	37	b2y2y3y4y4∞y5	6	8.0284	8.7048	0.0000	1	11	737.3595	11670.0
36196	737.3615	30.13	29.21	104.957																												1015			28	GDLNYR		PEP_FRAG_1	366	371	y4	1	5.5209	5.5209	0.0020	1	2	737.3615	1015.0
36202	737.3601	23.84	24.35	39.1082																2628												43623	37982	59542	29	TAENFR		PEP_FRAG_1	32	37	b2y1y2y3y3*y4y4*y4∞y5y5∞	10	8.7048	8.7048	0.0000	4	11	737.3601	33501.0
36204	737.3608	21.13	24.44	104.901											2026																				11	TAENFR		PEP_FRAG_1	32	37	y4	1	7.1729	8.7048	0.0000	1	11	737.3608	2026.0
36212	737.3852	34.32	33.48	104.314		9876																										8165	7673	8705	29	NFTVEK		PEP_FRAG_1	231	236	b2b3b3∞b4∞y4	5	7.2715	7.2715	0.0005	1	2	737.3869	5455.0
36213	737.3838	34.42	33.41	40.85			1066																												3	NFTVEK		PEP_FRAG_1	231	236	y4	1	6.7415	7.2715	0.0005	1	2	737.3838	1066.0
36221	737.3528	29.27	32.05	108.378											1716	2011				1704	1705					1494									16	SGVMSEK		PEP_FRAG_1	251	257	y4∞	1	5.377	5.377	0.0025	1	2	737.3542	1616.0
36229	736.4402	35.54	37.49	108.299					5011			3466	4517	3466				2866		6052	4669		5172					4320	4440	3751	4389				5	GIAYGKK		PEP_FRAG_1	184	190	y5y7	2	4.913	4.913	0.0030	2	2	736.4416	3238.0
36235	737.3833	36.89	38.9	103.92				9795	8399		8661	8232	5700	7082	5576	7618	5340	6703	8562	11851	9769	9840	12202	11894	11557	12179	12026	9376	10366	11064	10602				12	IENSFK		PEP_FRAG_1	801	806	b3b6y1y5	4	5.2269	5.2269	0.0027	1	3	737.383	7657.0
36242	737.3813	36.09	38.01	103.705					5240		9181	5939	7923				5358	6131	4489							9860	9030	9426	3466		3403				7	LEGYQK		PEP_FRAG_1	933	938	b6y3y4	3	5.4399	5.4399	0.0020	4	5	737.3833	5685.0
36292	737.391	99.03	100.49	110.028																														1427	30	DLVMFI		PEP_FRAG_1	234	239	b2b3	2	6.5872	7.0333	0.0006	1	20	737.391	1427.0
36293	736.5104	45.04	46.93	42.2269				14488	14785		11992	11620		9063	10188	10042		18681	17210	11391	9198		13145	11958	11830	10799	10401	10691	7916	8712	10254				19	IIIHLK		PEP_FRAG_1	253	258	b4y3y4y5	4	8.0612	8.0612	0.0000	20	24	736.5094	12412.0
36294	737.3914	99.05	100.11	110.297																													1662		29	DLVMFI		PEP_FRAG_1	234	239	b2b3	2	6.559	7.0333	0.0006	1	20	737.3914	1662.0
36295	737.3906	99.05	100.06	110.213																												1611			28	DLVMFI		PEP_FRAG_1	234	239	b3	1	6.121	7.0333	0.0006	1	20	737.3906	1611.0
36298	737.3745	50.45	52.07	105.198				7189	7063	5349	6473		4776		3310	3313	5126	8726	9194	6708	7360	8297	7813	7046	7232	6146	6534	4704	7056	6063	4886				12	MTLNMK		PEP_FRAG_1	37	42	y3	1	5.9967	6.6206	0.0011	1	2	737.3747	2524.0
36305	737.3572	33.49	35.55	101.447				2274		2549	1946					1391			1992	3031	3307		3406	3093	3427	3095	3957		2793	2229	3555	1711			17	STSTWR		PEP_FRAG_1	437	442	y5y6	2	5.9193	5.9193	0.0016	1	3	737.3583	3509.0
36317	737.4215	41.49	40.99	40.7306	58861	71547	65256										2361																93513		29	FVLSSGK		PEP_FRAG_1	49	55	b2b3b4b4∞b5∞b7y2y3y3∞y4y4∞y5y5∞y6	14	8.9842	9.2847	0.0000	4	28	737.4217	77192.0
36320	737.443	28.83	31.16	41.7667				8945	9091	12138	9239		9322		7183	6717				6745	12578	16103	7708	8206	7351	9111	9846	12330	11282	10392	10447				22	GLAHAIR		PEP_FRAG_1	16	22	y3	1	5.8664	6.2629	0.0013	2	4	737.4431	7521.0
36321	737.4207	41.78	40.97	113.4																														82384	30	FVLSSGK		PEP_FRAG_1	49	55	b2b3b4b7y1y2y3y3∞y4y4∞y5y5∞y6	13	8.8767	9.2847	0.0000	1	28	737.4207	82384.0
36322	737.4441	32.45	31.6	41.8373																												9040	10054	8882	29	GLAHAIR		PEP_FRAG_1	16	22	b7y3	2	6.2629	6.2629	0.0013	1	4	737.4449	7570.0
36325	737.3916	97.96	99.63	110.641				2561	2507	4558		2794			2046	1884	5799	4714	7332	2768	3971	3654	2320	2505	2279	5538	4300	5775	3438	3378					15	DLVMFI		PEP_FRAG_1	234	239	b2b3	2	7.0333	7.0333	0.0006	15	20	737.3918	2747.0
36334	736.4619	60.26	62.04	42.2751				5669	5454		2178	2738			3493	2508			3339	3906			4379	4626	3889	5524	3460	4467	3066	3212	1963				20	YLLSLK		PEP_FRAG_1	538	543	b2y3y4y5	4	6.9825	6.9825	0.0007	11	18	736.463	3538.0
36338	736.4621	62.04	62.06	116.265									2775																						9	YLLSLK		PEP_FRAG_1	538	543	b3y4y6	3	5.9026	6.9825	0.0007	1	18	736.4621	2775.0
36342	736.4598	62.02	62.02	115.608						3832																									6	YLLSLK		PEP_FRAG_1	538	543	b4b4∞y3y6	4	5.7382	6.9825	0.0007	1	18	736.4598	3832.0
36348	737.4226	40.82	42.45	112.101																	7447														17	FVLSSGK		PEP_FRAG_1	49	55	b3y4∞y5	3	7.3259	9.2847	0.0000	1	28	737.4226	7447.0
36349	737.4207	41.76	41.02	113.751																												79488			28	FVLSSGK		PEP_FRAG_1	49	55	b2b3b4b4∞b7y2y3y3∞y4y4∞y5y5∞y6	13	8.9687	9.2847	0.0000	1	28	737.4207	79488.0
36355	737.4686	34.03	33.18	42.1098	5845	6510	7370																									8722	7664	7135	28	LIHLNK		PEP_FRAG_1	137	142	y2y3y4y5	4	6.4368	6.4368	0.0013	5	5	737.4677	6666.0
36357	737.3852	38.17	40.06	104.425				9948	9612	9882	8044	5856	7865	5766	6932	7200	10348	8487	15865	9313	11595	10948	8581	8257	8533	8245	7770	8767	7870	8055	8129				8	AQYVEK		PEP_FRAG_1	879	884	y4y6	2	5.9849	5.9849	0.0015	4	4	737.3851	3373.0
36366	737.4938	58.02	59.89	43.0523				1668										3473		2704			2327	1969	2204	2414	2409	2244							22	LPGIPIK		PEP_FRAG_1	563	569	y3y4y6	3	5.9841	5.9841	0.0015	6	9	737.491	1452.0
36371	738.372	28.75	27.86	41.01																												5614	5654	5419	30	YDEAIK		PEP_FRAG_1	96	101	b4y5	2	6.4714	6.4714	0.0012	1	2	738.3723	3970.0
36392	738.4625	33.65	32.7	41.1	1137																														1	TLLVHR		PEP_FRAG_1	369	374	y4	1	5.1571	7.0181	0.0007	1	10	738.4625	1137.0
36395	738.465	33.2	32.34	41.05																													6598		29	TLLVHR		PEP_FRAG_1	369	374	y1y2y4y5	4	7.0181	7.0181	0.0007	1	10	738.465	6598.0
36400	738.4623	29.16	31.51	41.0878						3764	2957	3517						7540								5108	4388	4778	1790	2393	5603				22	TLLVHR		PEP_FRAG_1	369	374	y3y4	2	6.8647	7.0181	0.0007	7	10	738.4632	3697.0
36431	736.4197	59.55	61.26	41.5925				1848				1712							1319			2037	3281	3041	2552	2652	2590	2825	2744	2412	2146				22	FGIIMR		PEP_FRAG_1	156	161	y3y5	2	6.2174	6.2174	0.0013	9	14	736.4201	1581.0
36438	738.3682	32.02	33.99	106.04				1997	1799		4805	4495	5504						3330	4832		5332	7584	6887	8800	9393	8371	8566	4219	3764		3756		3527	19	DYALEK		PEP_FRAG_1	5	10	b2b3b4y1y2y3y4y5y6	9	8.1019	8.1019	0.0000	8	22	738.3691	7020.0
36450	738.4265	43.34	44.43	40.7875	4140				3134																3586	3120	2524	2366	4293	3931	3395	7565	6256	7688	5	APLGGAPR		PEP_FRAG_1	2	9	y7	1	5.7676	5.7676	0.0016	3	4	738.4266	1994.0
36489	738.4272	46.47	48.02	112.266				1679		3318			3775		1852	1949	3391	3297	7769		4635	5146	2123	2322	2198	2239	2045	2336							17	EHALLR		PEP_FRAG_1	1458	1463	b4b6y6	3	5.9138	5.9138	0.0016	2	2	738.4262	7477.0
36490	738.3702	42.42	44.65	108.45																1497			1956		1722										19	EDSFLK		PEP_FRAG_1	454	459	b4y6	2	5.6361	5.6361	0.0019	1	2	738.3704	1528.0
36493	738.3526	30.75	33.37	40.7197				2062	1730											3648	1868		3643	3807	3827	3136	3020	3184	2348	2593	4327				27	LMEMSK		PEP_FRAG_1	636	641	b3y4y5	3	6.8197	6.8197	0.0011	2	4	738.3545	2417.0
36496	738.3548	30.9	33.34	109.179											1982	3384												1751							12	LMEMSK		PEP_FRAG_1	636	641	b3y1y4∞y5y5∞	5	6.4049	6.8197	0.0011	1	4	738.3554	2810.0
36497	738.3684	43.38	43.51	107.385						2686			2958							1195		2461										1836	1605	1709	9	EDLYAK		PEP_FRAG_1	547	552	b3∞y3	2	5.6196	6.0942	0.0015	2	3	738.3661	2598.0
36500	737.4213	38.33	40.29	114.106					103624		113424	121140	132229	103001	134175	150867	112318	150829		128651		125886		122326	127892	107482	115685	126481	137702	138239	134772				12	FVLSSGK		PEP_FRAG_1	49	55	b2b3b4b4∞b5∞b7y1y2y3y3∞y4y4∞y5y5∞y6	15	9.2847	9.2847	0.0000	19	28	737.4222	191508.0
36504	737.4223	38.07	40.26	40.999				98118																											4	FVLSSGK		PEP_FRAG_1	49	55	b2b3b4b4∞b7y1y2y3y3∞y4y4∞y5y5∞y6	14	9.0593	9.2847	0.0000	1	28	737.4223	98118.0
36515	738.4203	66.03	67.64	41.273				4986	4105	3144	4369	4237		3122	4364	4237		6198		3335	2973	3241	4438	4179	4224	3753	3815	3700	3611	3456	3449				6	FPSFLK		PEP_FRAG_1	404	409	b3∞y4y5	3	6.0143	6.0143	0.0016	8	8	738.4202	6449.0
36520	738.3432	49.72	51.1	102.787	4417			6610	7314	9429	7342	7285	10209	5353	6522	6490	5753	5472	8313	7383	9967	9959	10278	10182	9546	6915	6230	6382	8042	7545	7470	5041	4743		15	DFSVDR		PEP_FRAG_1	110	115	y4y6	2	6.0452	6.0452	0.0015	3	4	738.3434	8075.0
36526	738.4416	38.75	39.84	38.8837	31545	34406	31963		90120					38664				73519		50715	47742	44244								65802					16	TTILYK		PEP_FRAG_1	31	36	b2b2∞b3b3∞b4b4∞y2y3y4y5	10	8.5857	8.8725	0.0000	10	30	738.4419	67640.0
36535	739.4011	30.61	29.7	105.735																													1101		29	TYNITK		PEP_FRAG_1	1268	1273	b3y6	2	5.3316	5.7381	0.0017	1	3	739.4011	1101.0
36541	739.3799	34.61	33.71	109.934																													2182		29	YLAMNK		PEP_FRAG_1	138	143	b2b3y4y6	4	6.8355	6.8629	0.0011	1	4	739.3799	2182.0
36546	738.3697	31.24	32.63	39.2803					8238	4585				2591									12439					9110	10057	10806	11592	6537	7125	7319	19	FTVDEK		PEP_FRAG_1	135	140	b4y2y3y4	4	7.5253	7.5253	0.0001	9	15	738.3687	12033.0
36559	739.3818	40.17	39.4	38.147																												7845	9270	7879	28	AGMFVSK		PEP_FRAG_1	657	663	b3b4b7y1y2y4y6	7	7.2855	7.2855	0.0005	3	19	739.3815	5761.0
36585	739.3838	47.54	48.86	37.797															3201																15	AGMFVSK		PEP_FRAG_1	657	663	y5y6	2	6.7441	7.2855	0.0005	1	19	739.3838	3201.0
36600	739.3798	69.19	69.27	107.634									2033																						9	AGMFVSK		PEP_FRAG_1	657	663	y6∞	1	5.7277	7.2855	0.0005	1	19	739.3798	2033.0
36607	738.4514	36.81	38.85	40.1634				3691	2818	2704	3114	2717			1285							1758	2369		1896	3478	3813	3868		2567	2611				5	IDLIHK		PEP_FRAG_1	219	224	y2y5	2	5.5287	6.3885	0.0013	2	9	738.4522	1795.0
36616	739.4477	23.81	23.42	43.265		1458																													2	LPKPER		PEP_FRAG_1	96	101	y4y5	2	7.1789	7.6709	0.0000	1	3	739.4477	1458.0
36618	739.4489	23.62	23.78	43.3597	6945																												5060	4814	30	LPKPER		PEP_FRAG_1	96	101	y1y2∞y3y4y5	5	7.6709	7.6709	0.0000	2	3	739.4484	3721.0
36634	739.3819	36.3	38.41	109.085				3720	2936	5856	3384	3204			6729	7203	3094	4796	2836	4728		3818	7418	4839	4623	8364	8340	8303	4600	7479	8367				23	AGMFVSK		PEP_FRAG_1	657	663	b3y2y3y4y6	5	7.1708	7.2855	0.0005	14	19	739.383	6201.0
36639	738.3985	63.73	65.21	112.231				2957		3503	4332	4706	5655	5050	5210	5837	3319	2222								2730	2552	2201	2358	2281	2191				9	MAFLTR		PEP_FRAG_1	1557	1562	y5∞y6	2	4.7955	5.6355	0.0019	1	5	738.3969	9866.0
36670	738.3631	54.56	54.04	40.8982	25839	30501	25029																									20867	21063	15035	28	MFGIDR		PEP_FRAG_1	604	609	y2y3y4y5	4	7.9584	8.4554	0.0000	6	28	738.3621	16620.0
36671	738.3637	52.05	53.65	40.7749				29469	31695	25321	33552	30120	27980	11657	19165	19593		25554	25681	34106	30188	30137	23152	24916	33478	37247	38641	37832	26034	24795	30524				16	MFGIDR		PEP_FRAG_1	604	609	b3y1y2y3y4y5	6	8.4554	8.4554	0.0000	22	28	738.3618	41143.0
36672	738.3678	52.63	53.67	108.077										8703			8680						11391	11115					9667	7899		6733	6079	6415	28	DSFELK		PEP_FRAG_1	229	234	b3b4y2y3y3∞y6	6	6.6652	6.6652	0.0011	4	22	738.3696	4857.0
36673	739.5209	38.14	37.21	42.0823																												10036	10319	9772	30	LRPILK		PEP_FRAG_1	745	750	b4b5y6	3	7.2998	7.3691	0.0004	3	27	739.5206	7099.0
36676	739.5189	38.72	37.58	42.348	1301																														1	LRPILK		PEP_FRAG_1	745	750	b4	1	5.4629	7.3691	0.0004	1	27	739.5189	1301.0
36690	739.5212	34.39	36.48	42.0091				6232	6411	5204	4964	5109	4810	4183	5110	5163		3765	3734	4322	5712	4915	5178	5828	5932	7368	6352	6887	5024	5133	6173				20	LRPILK		PEP_FRAG_1	745	750	b2b4b5y6	4	7.3691	7.3691	0.0004	22	27	739.5209	5472.0
36708	739.3638	21.55	23.93	41.7453			43184	1836												4417	1793	1836	2172	2130	1818	2597	2499	2402	1748			8901	7310	16662	30	YDNSLK		PEP_FRAG_1	140	145	b5*b6y4y5	4	8.3708	8.3708	0.0000	13	18	739.364	14804.0
36714	739.3692	20.61	24.01	107.569												2001																			12	YDNSLK		PEP_FRAG_1	140	145	y5	1	7.5694	8.3708	0.0000	1	18	739.3692	2001.0
36739	738.3713	45.0	46.62	106.344				2396		3304					1445	1534	2325	2062				3560	2815	2672	2564	2703	3171	3041	2081		1898		1817		19	DSFELK		PEP_FRAG_1	229	234	b3b4y6	3	5.7344	6.6652	0.0011	3	22	738.3724	2180.0
36747	738.4259	53.24	54.88	41.2562				3937	3515	3654	3519	3332		2519	4184	4613		2193	2074	4953	4422	2921	1467	1619	1609	3320	4715	4707		1725					24	YLMALK		PEP_FRAG_1	428	433	y1y4y5	3	5.9106	5.9106	0.0015	5	5	738.426	3135.0
36764	740.3706	35.51	37.29	38.7995						1830										3505									1718	1902					16	YMAEVK		PEP_FRAG_1	153	158	b6y4∞	2	5.7718	5.7718	0.0016	1	2	740.3695	3370.0
36768	740.3755	33.39	33.39	38.867						10385																									6	FNGQFK		PEP_FRAG_1	46	51	y2y4y5y5*	4	7.1696	7.9302	0.0000	1	12	740.3755	10385.0
36769	740.3759	30.35	33.2	111.117											2844																				11	FNGQFK		PEP_FRAG_1	46	51	y4y6	2	6.4485	7.9302	0.0000	1	12	740.3759	2844.0
36770	740.3787	30.45	33.08	111.074												3467																			12	FNGQFK		PEP_FRAG_1	46	51	y4y6	2	6.42	7.9302	0.0000	1	12	740.3787	3467.0
36780	740.3412	43.83	43.83	107.25						1061																									6	VGMDYR		PEP_FRAG_1	637	642	y5∞y6	2	5.98	7.1073	0.0006	1	12	740.3412	1061.0
36786	740.3453	32.12	34.15	39.5445						2746			3584		2645				2163	4494	3517	3943			2429	4937	3323		2723	2176					22	VGMDYR		PEP_FRAG_1	637	642	b2b3y2y3y3∞y4y5	7	7.1073	7.1073	0.0006	8	12	740.3438	3502.0
36794	740.3419	31.6	34.08	105.96												6657																			12	VGMDYR		PEP_FRAG_1	637	642	b2y2y3y5	4	6.2754	7.1073	0.0006	1	12	740.3419	6657.0
36795	740.3972	49.79	51.06	43.057													1261																		13	LAAFYR		PEP_FRAG_1	149	154	y4y5	2	5.4527	5.5692	0.0019	1	3	740.3972	1261.0
36811	740.3664	62.34	62.06	110.13	19455	16176	16990																									58424	66628	65108	29	SFMDLK		PEP_FRAG_1	26	31	b2b3b4b5b6y1y6	7	6.1268	6.1602	0.0014	1	6	740.367	54976.0
36821	740.4012	74.01	74.2	110.451																													22845		29	LAAFYGV		PEP_FRAG_1	891	897	b2b3b4y3y4	5	7.0886	7.7663	0.0000	1	27	740.4012	22845.0
36822	740.3999	73.99	74.21	110.532																												22434			28	LAAFYGV		PEP_FRAG_1	892	898	b2b3b4y3	4	7.4706	7.7663	0.0000	1	27	740.3999	22434.0
36823	740.4004	74.03	74.41	110.159																														27239	30	LAAFYGV		PEP_FRAG_1	891	897	b2b3b4y3y4	5	7.7663	7.7663	0.0000	1	27	740.4004	27239.0
36826	740.3673	52.06	53.57	108.189				5546	5067	5095	3891	4154	4969			2458			3984	4546	6284	6215	6419	6675	5233	4997	5127	5673	8220	6512	5535			3687	18	SKGAAVK	Phosphoryl STY(1)	PTM	148	154	b4b6y3	3	5.9583	5.9583	0.0016	9	10	740.3645	10892.0
36827	740.3685	54.27	53.94	107.973																													2305		29	SKGAAVK	Phosphoryl STY(1)	PTM	148	154	b4y3	2	5.6512	5.9583	0.0016	1	10	740.3685	2305.0
36895	741.3902	30.22	30.22	103.997						56247																									6	DPGLPSR		PEP_FRAG_1	93	99	y1y3y7	3	6.5728	6.9617	0.0008	1	9	741.3902	56247.0
36906	741.3927	38.47	37.98	40.232									2281																						9	DPGLPSR		PEP_FRAG_1	93	99	y3∞	1	5.2374	6.9617	0.0008	1	9	741.3927	2281.0
36907	741.3899	31.58	30.68	104.106																												11594	11283	12533	28	DPGLPSR		PEP_FRAG_1	93	99	y3y7	2	5.8884	6.9617	0.0008	1	9	741.3892	9484.0
36916	740.4003	72.35	73.83	110.565				27026	24387	25831	19224	18937	22326	19618	24243	25920	24023	21629	22942	20511	23077	23312	19123	18663	17710	23607	21447	20112	19599	19228	17434				6	LAAFYGV		PEP_FRAG_1	891	897	b2b3b4b5y3y4y7	7	7.5141	7.7663	0.0000	24	27	740.401	67886.0
36929	741.3344	36.24	38.48	41.7028					1975						2099	2564				2766		1912	1529	1903	1658	2519	2251	2328							5	SRSPSK	Phosphoryl STY(1)	PTM	247	252	b3	1	5.6097	5.6556	0.0018	1	2	741.3329	1258.0
36933	740.3996	85.45	86.96	108.262				9849	9492	12989	9736	11792	20676	6468	8368	9552	14202	14545	21015	10920	15254	13834	14222	13120	12844	12428	13695	13517	15109	16257	15447				21	FEFAVK		PEP_FRAG_1	396	401	b2b3∞y3y4y6	5	6.0283	6.0283	0.0015	2	2	740.4004	14260.0
36969	741.3557	38.08	39.96	107.269							6869	5781	9395				6416	4938	5080	4117	3918		5072	5209	4649	8012	8589	8120							17	EFFNGK		PEP_FRAG_2	377	382	b3y1y3y4y4*y5y6y6*	8	8.3243	8.3243	0.0000	13	14	741.3532	5280.0
36971	741.453	38.23	39.5	42.4971	10797	11498	8978	18021	18189					22284	26893	26355				20219	16821	18371	23547	24159		19601		20666	30067	27940	26667	11521	11759	12175	19	LAEALPK		PEP_FRAG_1	165	171	b2b3b4y1y2y3y4y5y5∞y6y6∞	11	8.3733	8.3733	0.0000	16	21	741.4515	23490.0
36973	741.4524	37.89	39.48	118.09						5549	15141	12390	12983				8443	6035	6019						9722		7527								9	LAEALPK		PEP_FRAG_1	165	171	b2b3b4b5y7	5	7.028	8.3733	0.0000	4	21	741.4514	16651.0
36975	741.4517	44.53	45.91	111.118						1493			2415							1844			1420			2001	1827								6	DVLIPGK		PEP_FRAG_1	337	343	b2y3y7	3	6.1745	6.4493	0.0013	4	15	741.4499	2077.0
36976	740.3666	60.21	61.73	110.422				24519	23288	24432	24320	26249	30504	5623	5053	6254	11954	10908	16810	20089	26830	23922	46292	47535	45192	30002	27557	27469	42726	36680	36001				27	IMDSFK		PEP_FRAG_1	155	160	b3b6y3y6	4	5.3225	5.3225	0.0021	2	2	740.3668	21794.0
36992	741.4503	53.13	52.69	111.46																													1407		29	DVLPLGK		PEP_FRAG_1	382	388	y4	1	5.8669	6.722	0.0011	1	24	741.4503	1407.0
36993	741.4513	53.11	52.71	111.82																												1180			28	DVLPLGK		PEP_FRAG_1	382	388	y4y7	2	6.1705	6.722	0.0011	1	24	741.4513	1180.0
37019	741.5011	54.74	55.73	43.22															2451																15	ILQVLR		PEP_FRAG_1	136	141	y5	1	5.467	5.894	0.0016	1	4	741.5011	2451.0
37021	741.5	56.58	56.25	43.0777																												7595	7596	6801	28	ILQVLR		PEP_FRAG_1	136	141	y5*	1	5.5914	5.894	0.0016	1	4	741.4988	5587.0
37025	741.4995	60.02	59.79	42.41																														3909	30	VLQLLR		PEP_FRAG_1	108	113	y3y4y5	3	7.4089	8.1164	0.0000	1	11	741.4995	3909.0
37030	741.3935	50.79	52.47	108.525					1977								2056		1939	2965			2289			2971		1767							24	NFVSFK		PEP_FRAG_1	1270	1275	b3y5y6	3	5.6025	6.1368	0.0016	2	9	741.395	1177.0
37033	741.4511	50.78	52.22	112.114				2104	2145	2866	2478	1846	2943		1911	1703	2295		2149	2523	2911	2842	2302	2333		2729		3097	2206	1771				1854	6	DVLPLGK		PEP_FRAG_1	382	388	b6y4y7	3	6.722	6.722	0.0011	20	24	741.4506	6167.0
37057	741.3896	61.47	62.86	107.85				3352	3129	5492	2331	2369	5215		3299	3313			4276	4372	5570	5898	4055	4106	4112	2697	3094	3077	3656	3076	2774		3295	3589	18	KTTALK	Phosphoryl STY(2)	PTM	106	111	b3b4b5b5∞y3y6	6	5.9594	5.9594	0.0016	5	5	741.3869	10610.0
37072	742.3462	29.47	31.06	42.4527				5809	5451										3932		3780	5739				3435	1919	3168				2578	2417	1590	29	EDFGFK		PEP_FRAG_1	148	153	y3	1	5.8169	5.8988	0.0016	1	5	742.3464	1591.0
37073	741.5238	63.98	63.91	41.1469	11807	14109	10901														958											19126	23804	22653	29	VLLVGLK		PEP_FRAG_1	39	45	b2y3y4y5y6	5	7.736	8.2519	0.0000	3	15	741.5225	18818.0
37074	741.5249	61.9	63.42	41.0715				25209	20573	13565	21411	21713	14007	15704	18443	20588		16584	14443	24182	20210	18922	17847	18507	18321	25069	24706	24133	21451	22526	20198				16	VLLVGLK		PEP_FRAG_1	39	45	b2y3y4y5y6	5	8.2519	8.2519	0.0000	11	15	741.5261	27973.0
37096	742.3109	36.93	38.52	102.174				3378	3193	2484	2336			5319	5686	5079					1277		5274	5326	5242	3930		2843	4981	5449	5273	10006	9549	10168	29	ELADSK	Phosphoryl STY(5)	PTM	1231	1236	y3y4	2	5.6816	5.6816	0.0017	9	9	742.3113	6925.0
37098	742.4465	29.29	31.93	38.9716				3501	3490		2352	3587						2466		3545	3352				2827	4185	4332	4266							17	IPGGGITK		PEP_FRAG_1	181	188	y6y7	2	6.3304	6.3304	0.0013	3	5	742.4462	3009.0
37104	742.4466	29.23	31.92	107.415												1145																			12	IPGGGITK		PEP_FRAG_1	181	188	y7y8	2	6.2276	6.3304	0.0013	1	5	742.4466	1145.0
37105	742.4837	38.33	37.44	39.333		4111																													2	VAALIQK		PEP_FRAG_1	11	17	b2y5y6	3	6.2742	7.8124	0.0000	1	25	742.4837	4111.0
37109	742.4827	38.13	37.09	39.1938	13616		14624																									9810	11239	10329	28	VAALIQK		PEP_FRAG_1	11	17	b3b6*y2y3*y4y5y6	7	7.3859	7.8124	0.0000	5	25	742.481	7475.0
37110	740.4507	36.64	38.37	41.0855				9067	9020	7025	9161	10810		13373	12300	13920		12374	9554	9320	8062		8106	7309	7684	11215	11760	12246	8969	9162	9317	7462	7658	8261	20	IHIVMK		PEP_FRAG_1	26	31	b2b3b4y2y3y4y5	7	7.9444	7.9444	0.0000	3	3	740.4507	7097.0
37126	742.4611	40.8	41.29	39.6493	149191		177402				2411									1523							2319					176267	183871		29	LNLVQR		PEP_FRAG_1	108	113	b2b2*b3b3*b4y1y2y2*y3y3*y4y4*y5y5*y6*	15	9.307	9.5161	0.0000	4	19	742.4591	153387.0
37142	742.4829	40.22	42.04	41.2191					3605	3097	2480	3127	3549		3132	3189		2516		3729				4192	4238	4890	4487								5	LQQLIK		PEP_FRAG_1	344	349	b3	1	4.1972	4.764	0.0030	1	3	742.4819	2295.0
37146	741.427	57.16	58.5	104.226				6642	6371	11545	6405	7126	11324		6054	6483	4336	3664	8472	7874	10491	11342	8925	8581	8666	7210	6949	7193	9827	7589	6449	6218	5949	6362	18	DLLQPR		PEP_FRAG_1	471	476	b6y4y6y6*	4	5.5683	5.5683	0.0023	1	4	741.426	21815.0
37157	741.5253	51.93	53.31	41.853				14003	11554	9712	9910	10895	8264	4185	5620	5061		9761	8618	9973	8725	8591	8179	9857	9078	10558	8937	9651	8855	8992	8522	14540	14561	15289	24	ILVAVVK		PEP_FRAG_1	66	72	b4y2y3y4y5y6	6	7.8571	7.8571	0.0000	25	26	741.5261	7702.0
37165	741.499	57.59	59.35	42.5139				24680	20973		17963	13043		5196		6575			1333	5082			10319	10276	9096	7145	7014	7364		8777	5780				20	VLQLLR		PEP_FRAG_1	108	113	y3y4y5	3	8.1164	8.1164	0.0000	10	11	741.4997	9104.0
37167	742.4845	55.0	54.56	118.407	4727	4375																										3679	3820	4609	29	GLALGIAK		PEP_FRAG_1	187	194	b3b5y8	3	5.6355	6.0547	0.0016	1	5	742.4842	2459.0
37176	742.4208	31.36	33.28	104.58				5138	2167	4355	3868		6172		2463	2738	2368	3483	4914	3785	7479	7294			4641	2476		2424	3802	3991			2216	2635	29	AQSIPAR		PEP_FRAG_1	55	61	y5∞y7	2	5.2512	5.6412	0.0018	1	3	742.4227	1425.0
37185	742.4623	38.59	40.65	39.6541					162350		206594			163836				181535						187825		167452	177879	201279							22	LNLVQR		PEP_FRAG_1	108	113	b2b2*b3b3*b4b4*b6y1y2y2*y3y3*y4y4*y5y5*y6*	17	9.3847	9.5161	0.0000	8	19	742.4597	158188.0
37187	742.4582	39.13	40.62	112.826						79150			35329		204860	211962	75527		63800		54417	45116							61001		67309				11	LNLVQR		PEP_FRAG_1	108	113	b2b2*b3b3*b4b4*b5y1y2y2*y3y3*y4y4*y5y5*y6*	17	9.5161	9.5161	0.0000	6	19	742.4585	267848.0
37196	741.3904	27.34	29.86	104.619				14630	14043		12460	11688	11242		18681	19839	10801	8405	10083	21987	15726	13638	15523	15376	12218	14517	14170	13499	13726	12317	13310				16	DPGLPSR		PEP_FRAG_1	93	99	b2b4b7b7∞y3y7	6	6.9617	6.9617	0.0008	5	9	741.3909	29387.0
37210	742.4834	52.47	54.06	118.73				2982	2787	3323	3971	2382	3330		4382	3626	2805		2780	3318	3742	3540	3671	3129	3150	3513	3268	3382	2841	2486	3020				21	GLALGIAK		PEP_FRAG_2	187	194	b5y8	2	5.6518	6.0547	0.0016	2	5	742.4843	2348.0
37221	742.3793	47.03	48.58	41.7399				3676	3469	2476	2316	2213	2392		2645	3022			2494	3166	3331	2597				3829	3947	2581							24	FFDVSK		PEP_FRAG_1	25	30	y4y5	2	5.9902	5.9902	0.0015	2	3	742.3783	1747.0
37227	742.4836	34.14	36.37	39.193				6459	6308	11437	6452	6617			6003	6559		6371	8395	7195	9697	6981	6816	5703	6187	7423	6965	8568	7199	8042	8262				17	VAALIQK		PEP_FRAG_1	11	17	b3b4b5y3y4y5y6	7	7.8124	7.8124	0.0000	18	25	742.4833	15186.0
37233	742.4877	74.84	76.51	44.5197																						4868	4023	3587							22	LQQLIK		PEP_FRAG_1	344	349	b3	1	4.4905	4.764	0.0030	1	3	742.4889	2503.0
37243	742.3792	62.99	64.51	112.435				2049	2072		1895	1767	3293	2190	2611		2359		2815	2091	3153	3320	2620	2670	2504	2777	2838	2691	2159	2284					9	DYVFAK		PEP_FRAG_1	466	471	b2b5y3y4y6	5	5.9898	5.9898	0.0016	1	2	742.3774	4670.0
37283	743.3397	28.73	27.84	39.3607																												11574	13036	11212	28	FGDYNK		PEP_FRAG_1	134	139	b1b3y1y2y3y4y5y5*	8	8.5924	8.5924	0.0000	3	3	743.3386	9743.0
37288	743.3386	29.8	29.8	39.265						19880																									6	YGDFNK		PEP_FRAG_1	134	139	b3y2y2*y3y5y5∞y6*	7	8.051	8.051	0.0000	1	14	743.3386	19880.0
37290	743.3409	30.88	30.06	39.258																												6115	6247	6886	28	YGDFNK		PEP_FRAG_1	134	139	y3y4*y5	3	7.605	8.051	0.0000	3	14	743.3398	4589.0
37296	743.3399	26.64	29.3	39.4835					4524		4347	5065			1290	3211		3966		3792						10396	8045	7928			5015				24	YGDFNK		PEP_FRAG_1	134	139	y3y4y5	3	7.5334	8.051	0.0000	10	14	743.3392	6337.0
37317	742.4838	43.76	45.49	115.559				31190	29101	35724	26693	25583	29627	16146	15271	15408	19719	17585	31964	29671	40420	35975	27221	29222	25984	29421	30576	32515	28646	27862	31363				9	IIGQLAK		PEP_FRAG_1	316	322	b2b6b7b7*y3y5y5*y6y7y7*	10	7.0211	7.0211	0.0007	2	2	742.4826	45915.0
37335	743.4046	39.06	41.33	107.798											1282																				11	RDPLDK		PEP_FRAG_1	364	369	b4	1	5.2641	5.2641	0.0026	1	2	743.4046	1282.0
37340	743.4316	36.92	38.29	113.018	105208	104490	99037	116361	118823	130716	127320	122921	157994	101317	138309	142746	181524	199299	213131	119505	99283	92355	141985	132798	140040	119173	96248	119256	88801	94553	77807	48150	48133	57917	16	GIIDPTK		PEP_FRAG_1	517	523	b2b3b5b6b7y1y2y2∞y3y3∞y4y4∞y5	13	9.5208	9.5208	0.0000	30	30	743.4323	168833.0
37347	743.4583	28.1	27.19	40.835																														4192	30	IKPMVR		PEP_FRAG_1	227	232	y4	1	6.2997	6.3783	0.0013	1	2	743.4583	4192.0
37374	743.4211	40.44	42.55	105.987																			1975						5416	4124	4669				25	AAQALNR		PEP_FRAG_1	733	739	y4*y7	2	4.5191	5.1172	0.0028	1	2	743.4217	3444.0
37382	743.4116	44.1	45.57	106.949				6811	6463		4951		4496	5266		5426	3282	5397	6372	7448	6056	5843	8472	8498	7176	6338	6219	6115	8441	7705	6500	8557	8653	9233	15	DPTAALR		PEP_FRAG_2	430	436	y2y3y4	3	5.4323	5.4323	0.0020	2	2	743.4097	5873.0
37412	743.4675	49.69	49.04	41.7837																												12936	9968	12580	30	VDVAVLK		PEP_FRAG_1	1499	1505	b2b3b4y2y4y5y6	7	7.6597	7.6597	0.0000	2	4	743.4672	9389.0
37435	743.4416	46.95	47.64	109.351	12226	26154	27414	4600	3790	4486				8558		10448	4613	4383	7947		3758					15290	14931	15558			35275	15341	13693	15838	28	NELVIR		PEP_FRAG_1	388	393	b3b4b6y1	4	6.615	7.1128	0.0006	3	20	743.4433	12118.0
37445	743.4059	33.13	35.27	102.64				7699	3919	3506	8905	3433	15976	25943	30022	33449	12840		8396	5036	12435	5986	10379	9065	4703	7127	5364	3436	18934	18671	6891				19	GPTAAQAK		PEP_FRAG_1	16	23	y7y8	2	6.3525	6.3525	0.0013	1	4	743.4064	9914.0
37449	743.4659	61.42	62.53	113.638	18315	14309	15870	3261	2952	3105	5683	6109	5769				4172	3948	4099	5224	5922	4993	5816	5521	6270	10486	10443	9904	4520	4288	4025	4451	4808	5148	22	QIILEK		PEP_FRAG_1	326	331	b4y2∞y6	3	6.0295	7.4459	0.0002	1	4	743.4659	7409.0
37459	743.442	70.8	70.92	111.165									1947																						9	NELVIR		PEP_FRAG_1	388	393	b4b6y6y6*	4	5.6467	7.1128	0.0006	1	20	743.442	1947.0
37470	743.4319	52.09	53.23	110.622	11307	8808	9314	16592	15290	14962	22155	20828	22441	10479	10186		16599	16529	14988	23885	26316	26129	18411	17844	15938	17111	16392	15365	37908	37196	31243	9998	9594	10173	19	SAVIPEK		PEP_FRAG_1	82	88	b3b4∞y7	3	5.1928	6.7708	0.0011	1	11	743.4313	16980.0
37471	743.4423	52.54	53.7	108.144	27031	21844	24639	53329	50272	69535	46747	45873	63807	43871	47857	47270	40381	34408	52109	50531	68844	68625	54749	54073	56895	53082	52475	50806	64737	52596	47503	52410	50864	51150	29	VLADLGR		PEP_FRAG_1	2	8	b6b7b7∞y1y5	5	6.3579	6.3579	0.0013	1	2	743.4439	41149.0
37486	743.4152	113.12	114.81	108.44																												13744	13711	14103	29	ILGFFF		PEP_FRAG_1	125	130	b2b3b4y2	4	6.9086	7.6333	0.0000	3	21	743.4146	11411.0
37494	743.5036	38.78	37.8	43.4067	8588	7349	8022																												3	IKELLK		PEP_FRAG_1	930	935	y2y4	2	5.6541	7.3253	0.0005	2	5	743.5034	1827.0
37502	744.3334	30.62	30.62	39.766						22590																									6	FSDGYR		PEP_FRAG_1	727	732	b6b6∞y1y2y3y4y5	7	7.9104	7.9512	0.0000	1	25	744.3334	22590.0
37508	743.4687	38.72	40.8	43.9306				4012	3775		6100	6208						7154								5450	6208	7966							24	QIILEK		PEP_FRAG_1	326	331	y3y4y5∞	3	7.4459	7.4459	0.0002	3	4	743.468	6459.0
37513	743.4677	67.82	69.19	113.052				7453			6463	6770	6669	3746	5523	6210	5190	4164	5040	5300	6030	5081	5425	4924	5677	7058	5794	5512	5230	5337	4465	7476	7551	8218	28	VLQTIGI		PEP_FRAG_1	1035	1041	b3b4b4∞b5∞y7*	5	5.8411	5.8411	0.0016	17	17	743.4673	5826.0
37516	743.4427	68.57	69.72	107.672	13057	5085		6821	5824	8662	6845	5978	6357	8078		8603	6976	7345	9938	22117	33321	31874	9586	9240	9726	11344	12785	11276	14756	13970	11983	20889	21265	22311	17	NELVIR		PEP_FRAG_1	388	393	b3b4b5b6*y1y3y6	7	7.1128	7.1128	0.0006	16	20	743.4425	67778.0
37543	744.4058	35.33	34.48	39.106																												11644	12848	13392	28	EFALHK		PEP_FRAG_1	21	26	y2y3y4	3	7.578	7.578	0.0000	3	3	744.4054	9192.0
37547	744.3384	56.29	57.53	38.2692						1515										2033	1430	1600				1874									6	FGMDFK		PEP_FRAG_1	263	268	y2y5	2	5.4679	5.9135	0.0016	2	5	744.3378	2091.0
37552	744.395	47.01	46.29	43.5																														15078	30	YYASLK		PEP_FRAG_1	1217	1222	b4y3y6	3	6.207	6.207	0.0013	1	7	744.395	15078.0
37561	744.4609	30.19	29.31	39.241																												3686			28	VLVTGAGK		PEP_FRAG_1	10	17	b2y4y5y7	4	6.7375	6.7375	0.0011	1	2	744.4609	3686.0
37565	743.4148	111.89	113.61	108.605				34171	27926	24804	22672	25293	30411	9556	13976	12803				7002	10443	10490	22744	18919	16744				22373	20434	26516				20	ILGFFF		PEP_FRAG_1	125	130	b2b3b4y2	4	7.6333	7.6333	0.0000	18	21	743.4151	20964.0
37567	744.4622	32.42	31.5	38.9408	76285																											49628	50024	48319	30	LATALQK		PEP_FRAG_1	70	76	b2b3b3∞b4b4∞b5y2y2*y3y4y5y5*y6y6∞	14	8.6271	8.6271	0.0000	4	6	744.4642	40201.0
37569	744.4636	32.51	31.73	38.855			27709																												3	LATALQK		PEP_FRAG_1	70	76	b2b4b4∞y1y2y2*y3y4y5y6y6∞	11	8.417	8.6271	0.0000	1	6	744.4636	27709.0
37573	744.4402	34.42	33.62	40.5377																												8353	8351	7949	28	VITFHK		PEP_FRAG_1	431	436	y4y5	2	7.5039	7.5039	0.0001	2	3	744.4412	6320.0
37580	744.4615	40.31	39.44	40.947		4699	4919																											10414	30	LQSVLGK		PEP_FRAG_1	283	289	b2y2y3y5y6y6*y6∞	7	7.7927	8.0335	0.0000	1	12	744.462	7622.0
37585	744.4269	42.38	44.27	43.8988				7326																				8087	5139	5647					4	LEDVLR		PEP_FRAG_1	544	549	y3y4y5	3	7.0263	7.0263	0.0006	3	5	744.4289	5215.0
37588	744.4675	30.76	33.29	39.2687				8436	8113		5353	5860						8679								8038		6670			3760				24	VINTGIK		PEP_FRAG_1	580	586	y1y5y6	3	6.8055	6.9777	0.0007	3	5	744.4641	5242.0
37590	744.4623	33.11	33.53	38.9927																			4564									8052		7578	30	VINTGIK		PEP_FRAG_1	580	586	y5y6	2	6.9777	6.9777	0.0007	2	5	744.4599	5390.0
37603	744.4246	48.3	48.92	42.7935										5153	5847	5090																4887	6280	5015	28	LEDVLR		PEP_FRAG_1	544	549	y5y5∞	2	6.6257	7.0263	0.0006	1	5	744.4274	3328.0
37606	744.4256	31.61	30.75	38.316																												8358			28	AAVAGLDK		PEP_FRAG_1	845	852	y2y2∞y4y5y6y7	6	7.4116	7.6549	0.0000	1	3	744.4256	8358.0
37610	744.4292	31.69	30.76	113.654																													7100		29	AAVAGLDK		PEP_FRAG_1	845	852	y2y4y5y6y7	5	7.3675	7.6549	0.0000	1	3	744.4292	7100.0
37611	744.4259	31.67	30.74	113.452																														7429	30	AAVAGLDK		PEP_FRAG_1	845	852	b3b5y2y4y5y6	6	7.6549	7.6549	0.0000	1	3	744.4259	7429.0
37614	744.462	49.18	50.77	42.9227							2032	1953							1896		2432						1983	2008							17	LETLLR		PEP_FRAG_1	174	179	y4y5	2	6.0614	6.137	0.0015	1	4	744.4636	2833.0
37617	744.4633	49.87	51.62	113.882										2441	2528	3066				4814		6463													12	LTELLR		PEP_FRAG_1	396	401	b3b6y1y6	4	6.0006	6.8703	0.0011	1	11	744.4652	2335.0
37625	744.4281	52.32	54.16	41.7606							3361												1563			8381	6560	6033							22	IDLLDR		PEP_FRAG_1	232	237	y3y4y5	3	7.6213	7.6213	0.0000	2	3	744.4291	6021.0
37635	744.4655	56.29	56.29	115.603						1659																									6	LETLLR		PEP_FRAG_1	174	179	y3y4∞y5	3	5.7674	6.137	0.0015	1	4	744.4655	1659.0
37640	744.4417	40.25	42.09	44.1247							5227	3063							1504																8	VITFHK		PEP_FRAG_1	431	436	y4	1	6.4334	7.5039	0.0001	1	3	744.4438	1735.0
37647	744.4612	68.68	68.7	116.836									1489																						9	NGLSLLK		PEP_FRAG_1	457	463	b3b5∞	2	5.1248	6.2765	0.0013	1	7	744.4612	1489.0
37648	744.428	36.67	38.73	110.892					3335								8553					4293			4423	5598	5570	5017							24	VVEEIR		PEP_FRAG_1	58	63	b3∞y2y6	3	5.3365	5.3365	0.0021	1	2	744.4279	3658.0
37669	744.4583	64.39	65.59	111.352						3627	5747	4688	6715	4944	5031	5873	6138	5372	3387		3223	3457		1925			2580								15	ELIEIK		PEP_FRAG_2	692	697	b3y3y4y6	4	5.7396	5.7396	0.0017	2	2	744.4556	2567.0
37700	745.4086	27.22	26.2	40.11			1434																												3	SVESVPK		PEP_FRAG_1	324	330	y2y5	2	5.7341	5.7341	0.0016	1	2	745.4086	1434.0
37702	744.4264	54.78	56.13	111.695				6750	6850	7835	6094	6238	8295	5108	5803	6940	5818		5425	6148			5686	5496	6061	5673	5853	5195	5175	5175	4828	5357	5584	5366	8	VVEEIR		PEP_FRAG_1	58	63	b3∞y1y6	3	4.6452	5.3365	0.0021	1	2	744.4273	3820.0
37716	745.3877	30.43	32.33	103.372																								1003							24	VQDDLR		PEP_FRAG_1	138	143	b3y6y6*	3	4.5664	5.3274	0.0025	1	3	745.3877	1003.0
37717	744.4465	44.78	46.49	107.609				12250			12867		17573	5983			7782	7638	15576	12685	13284	15020	14636	14634	14073		12304		9463	9855	9423				27	QWLLGK		PEP_FRAG_1	204	209	b6y4y6y6*	4	5.4845	5.8839	0.0015	1	3	744.4427	5664.0
37726	745.4258	29.87	32.49	41.951																				4572											20	LETNLR		PEP_FRAG_1	303	308	b5y3	2	5.8252	6.5659	0.0011	1	3	745.4258	4572.0
37734	744.3345	27.94	30.24	40.0015				8348	9386		8121	7427		3545				13328	8061	10727	6295	7207	8668	9068	8790	10904	11348	11757	6236	6720	7336		3629	3270	16	FSDGYR		PEP_FRAG_1	727	732	y3y4y5	3	7.9512	7.9512	0.0000	21	25	744.3347	13684.0
37735	744.3335	28.46	30.33	110.367									8365		5032	9638	8251																		12	FSDGYR		PEP_FRAG_1	727	732	b2y1y3y4y5y5∞	6	7.6546	7.9512	0.0000	3	25	744.3347	10540.0
37736	744.4308	62.28	64.17	42.7303				2263	2013														1461	1683											5	LEDVLR		PEP_FRAG_1	544	549	b4y2y5∞	3	5.8816	7.0263	0.0006	1	5	744.4311	1283.0
37752	745.4213	26.5	28.78	109.579				1951	2868	11996	2178	2045	2727		4480	4796	2971	3634	6748	3409	4207	1967	1886	2175	2736							2716			28	EAEIKR		PEP_FRAG_1	27	32	b3y3y6	3	5.805	5.805	0.0016	3	4	745.4209	1923.0
37759	744.4622	49.86	49.65	113.417									3929																						9	LETLLR		PEP_FRAG_1	174	179	b6y3y4∞y6	4	6.137	6.137	0.0015	1	4	744.4622	3929.0
37760	744.4271	56.28	57.51	108.152					4161		3101	3214	4618	3723	4075		3726		4351		5021						3747	4096	4636	4024	3741	4972		5195	11	ENLQLK		PEP_FRAG_1	383	388	b3b4y6	3	5.2163	5.3317	0.0021	1	2	744.4276	3212.0
37761	745.4432	34.23	36.5	107.625				5947	6417										2729	8732	6051														4	LTVVGEK		PEP_FRAG_1	399	405	y3y7	2	5.8666	5.988	0.0015	1	2	745.4458	4102.0
37770	745.42	33.94	36.06	110.293															7271																15	EAEIKR		PEP_FRAG_1	27	32	b3y3y6	3	5.5723	5.805	0.0016	1	4	745.42	7271.0
37788	745.448	38.25	39.59	41.1933									1870			1295							1408												12	VDTAVIK		PEP_FRAG_1	1484	1490	y6	1	5.9569	5.9569	0.0015	1	5	745.4461	1036.0
37789	745.4447	30.56	32.56	41.2121				15575	17730	16009	16954	16111		12440						13157	10924		10146	10497	10641	15067	14888		9710	10064	11011	8271	10911	10443	29	LAETLAK		PEP_FRAG_1	9	15	b4y2y3y5y6	5	7.5134	7.9066	0.0000	12	18	745.447	8180.0
37790	745.4466	31.44	32.21	108.455				1598		2472			2209																						9	DKELLK		PEP_FRAG_1	281	286	y4y6	2	6.1548	7.6432	0.0000	1	3	745.4462	1290.0
37792	745.4461	30.75	32.49	115.94									15207		21038	20967												4793							11	LAETLAK		PEP_FRAG_1	9	15	b2b3b4b4∞b5b5∞y2y3y4y5y6	11	7.9066	7.9066	0.0000	4	18	745.4461	24168.0
37810	745.4237	31.23	33.87	41.553												1369																			12	SILQER		PEP_FRAG_1	266	271	b3y4∞	2	6.8894	6.9608	0.0008	1	3	745.4237	1369.0
37825	745.4504	30.38	29.54	41.8463																												6318	4989	4522	29	VSEIVAK		PEP_FRAG_1	768	774	b4y6	2	6.7271	7.0475	0.0006	1	3	745.4498	3416.0
37826	745.419	44.56	43.78	42.869		2498																													2	SLADIAR		PEP_FRAG_1	87	93	y2y3y4y5	4	7.0549	8.2586	0.0000	1	20	745.419	2498.0
37830	745.4216	32.86	34.82	40.1894				7509	9827		5932			8294	8591	7938			4578	8739			10872	10763	9930		6126		8761	9369	9570	17216	16805	15741	26	LETNLR		PEP_FRAG_1	303	308	y5y6	2	6.1782	6.5659	0.0011	1	3	745.4202	5736.0
37834	745.4835	45.08	44.3	40.703																												14623	15256	16567	30	LLTTIGK		PEP_FRAG_1	938	944	b2b4b4∞y2y3y4y5y6y6∞	9	8.0391	8.0391	0.0000	3	21	745.4837	12639.0
37835	745.4813	40.42	42.2	41.2052				3061	3259	2902	2066		3327		1757					2075			2114	2507	2255	2080	1746	2326							22	TLAVITK		PEP_FRAG_1	210	216	b2y2y5	3	6.1651	6.1651	0.0014	4	6	745.4837	1366.0
37838	745.4014	39.37	41.17	39.7627				5250	5265	2974	5139	3707	3488						2774	3141	3197	3722	3699	3361	3864	3383	4982	5396	3367	3086	3396				24	IPSSWR		PEP_FRAG_1	247	252	y3y4	2	5.8262	5.8262	0.0016	2	2	745.4019	3982.0
37843	745.4119	47.05	47.05	105.876						2802																									6	AAVDLEK		PEP_FRAG_1	2	8	y5y7	2	5.9117	5.9117	0.0016	1	2	745.4119	2802.0
37845	745.4579	25.57	27.74	42.0012						2072																2182	1961	1959			2940				6	ILLSSGR		PEP_FRAG_1	51	57	y4	1	6.617	8.6193	0.0000	1	7	745.4564	2534.0
37850	745.4581	40.53	39.68	116.6																														19900	30	LLSSGLR		PEP_FRAG_1	6	12	b7y5y6	3	6.4328	6.9981	0.0007	1	5	745.4581	19900.0
37854	745.4483	46.76	48.09	41.246													52206																		13	ALFAVPK		PEP_FRAG_1	183	189	y3	1	5.1513	6.1077	0.0015	1	10	745.4483	52206.0
37861	745.48	42.1	43.9	40.6078				12166	10901	10812	11718	10407	12732		6304	6378				9545	10142	10195	12012	11530	11130	11046	10493	11841	11088	9492	9050				19	LLTTIGK		PEP_FRAG_1	938	944	b2b4∞y2y3y4y5y6y6∞	8	7.5868	8.0391	0.0000	17	21	745.4807	11442.0
37862	744.3958	44.03	45.96	43.6723				8714	9928		10172	10093		11671	11596	10825		8837	8324	9673			13487	13745		11778	13030	12712	9450	9877	12736				4	YYASLK		PEP_FRAG_1	1217	1222	b4b5y2y3	4	6.0494	6.207	0.0013	6	7	744.3961	6335.0
37863	745.4826	41.95	43.87	118.941														1396																	14	LLTTIGK		PEP_FRAG_1	938	944	b4∞y7	2	5.3805	8.0391	0.0000	1	21	745.4826	1396.0
37875	745.4462	48.63	50.42	41.406										5959	6776	7069																			11	TIGVIDK		PEP_FRAG_1	728	734	b6b7y3y5∞	4	5.787	5.9736	0.0016	1	4	745.4477	6283.0
37879	745.4207	41.94	43.43	110.219				29892	25376	23220	29870	32073	27219	26449	29134	29213	21349	23953	32166	32853	35915	33497	32976	31873	32631	27089	26048	27181	29990	28816	25677	17286	19700	21873	25	SLADIAR		PEP_FRAG_1	87	93	b2b4y1y3y5	5	8.2586	8.2586	0.0000	17	20	745.423	20939.0
37881	745.422	44.33	43.48	42.6503																												4935	5594	5240	28	SLADIAR		PEP_FRAG_1	87	93	y2y3y4y5	4	7.502	8.2586	0.0000	2	20	745.4223	3354.0
37891	745.4835	46.9	48.17	41.2445	57859	68338	64289	93890	98269		97451	94079		53726	57284	60472		85448	87119	66790		57633	70270	70931	68942	60198	58015	60879	64744	66746	63265	35715	38979	41894	21	VTLATLK		PEP_FRAG_1	74	80	b2b3b3∞b4b5∞b6∞b7y2y3y4y4∞y5y5∞y6y6∞	15	9.3255	9.3255	0.0000	26	28	745.4835	70087.0
37892	745.4822	48.43	48.21	113.769									143195																						9	VTLATLK		PEP_FRAG_1	74	80	b2b2∞b3∞b4b5b5∞b6∞b7y1y2y3y3∞y4y4∞y5y5∞y6y6∞	18	8.7694	9.3255	0.0000	1	28	745.4822	143195.0
37894	745.4818	46.76	48.09	113.767													34093																		13	VTLATLK		PEP_FRAG_1	74	80	b4b5b5∞b6b7y3y4y4∞y5y5∞y6y7	12	7.4885	9.3255	0.0000	1	28	745.4818	34093.0
37909	744.3824	35.58	37.68	40.5576				29444	29547		23918	24999	18816	12455	14685	17129				17330			33799	37389	34479	21352	18581	18809	25410	23308	24477				19	DGFHIR		PEP_FRAG_1	83	88	b2b4y2y3y4y5y6	7	7.7602	7.7602	0.0000	15	16	744.381	34188.0
37913	744.3831	37.95	37.95	105.196						2014																									6	DGFHIR		PEP_FRAG_1	83	88	y5	1	5.7901	7.7602	0.0000	1	16	744.3831	2014.0
37923	745.3696	29.75	32.02	39.0221				4398		4589									9899		4100	4355	5298	4586	4315				5288						15	MGPGIDR		PEP_FRAG_1	404	410	y3y4y5y6	4	7.6971	7.6971	0.0000	9	9	745.3691	7638.0
37928	745.4836	58.09	59.15	116.907						1139			1857									1465				1988	2015	2055							23	AISTLLK		PEP_FRAG_1	331	337	b4y7	2	5.0569	5.612	0.0019	4	6	745.4848	1247.0
37938	744.4502	51.0	53.09	110.573																					2741										21	IEIEIK		PEP_FRAG_1	115	120	b4y2y3y6	4	7.2344	7.2344	0.0005	1	7	744.4502	2741.0
37944	745.4651	53.63	53.2	41.8603																												20858	23948	24257	29	LMVALAK		PEP_FRAG_1	170	176	b2b3b4y2y3y4y5y6	8	8.2545	8.2545	0.0000	3	22	745.4645	18824.0
37946	745.4506	43.38	45.04	40.038				1887	2053				1846			1696							1711	1978											4	EVSGLLK		PEP_FRAG_1	14	20	y5	1	5.9908	5.9908	0.0015	1	2	745.4523	1229.0
37962	745.4607	63.17	64.73	40.5889				1951	1786	1208	1767	1970			2097	1997				1417															6	GPIFALK		PEP_FRAG_1	267	273	b3b4	2	5.0166	5.5091	0.0020	1	2	745.46	1607.0
37967	745.4615	59.73	61.29	41.3843				5346	5338	4562	3614	4320	4244		2799	2766		4418	3216	5328	3771		4178	5043	5182	5862	5693	4739	2875	2700	2296				17	LLSWVK		PEP_FRAG_1	106	111	b4b5y2y4y5	5	6.7446	6.7446	0.0011	8	10	745.461	5932.0
37973	745.4616	58.96	60.14	117.272						1729			2816		1801	2771	3882		3361	3810	2491	2298				3914		2238							9	ALFAVPK		PEP_FRAG_1	183	189	b3b4y2y3	4	6.0298	6.1077	0.0015	5	10	745.4635	3228.0
37977	745.4643	58.6	60.23	41.047														1209																	14	ALFAVPK		PEP_FRAG_1	183	189	y5	1	6.1055	6.1077	0.0015	1	10	745.4643	1209.0
37984	745.4649	74.06	75.42	112.679					2251	3451		2193	3162		3366				2928	2634	4316	3737	3124	2982	2816	3118	3160		3124	2795	2501	2387			28	LMLLQK		PEP_FRAG_1	1062	1067	b3y6	2	4.78	5.1541	0.0028	1	3	745.4662	1767.0
38011	746.353	28.72	31.27	109.831																						5255	3940	6087	1906						24	DEMVPR		PEP_FRAG_1	369	374	y2y3y4y5∞	4	7.1736	7.1736	0.0006	2	2	746.3544	4633.0
38020	746.3232	38.04	39.66	41.8466						3500				6984					1641	5084											2773				16	EPDEEK		PEP_FRAG_1	549	554	b6y5∞	2	5.843	5.843	0.0016	1	2	746.3232	5415.0
38031	745.4057	42.07	44.06	43.7707				2368	2915			4439			2605	2667		4511	4059	3337			2896	2994		4678	5288	4996	2237	3028	2558				4	NLEELK		PEP_FRAG_1	799	804	y4y4∞	2	5.6702	5.8751	0.0016	1	2	745.4115	1545.0
38065	746.4082	37.71	36.32	43.251		1273																													2	TIEDLR		PEP_FRAG_1	168	173	y4	1	6.4854	6.7254	0.0011	1	6	746.4082	1273.0
38067	746.4071	37.64	36.64	43.862	1267																														1	TIEDLR		PEP_FRAG_1	168	173	y4	1	6.6429	6.7254	0.0011	1	6	746.4071	1267.0
38068	746.4061	34.2	36.58	43.272							1502																								7	TIEDLR		PEP_FRAG_1	168	173	y4	1	6.7254	6.7254	0.0011	1	6	746.4061	1502.0
38078	746.4017	41.57	40.82	40.6917																												3474	3578	3333	29	INVMNR		PEP_FRAG_1	60	65	b3y5*	2	5.4747	5.8792	0.0015	1	2	746.4032	2282.0
38086	746.4059	27.37	29.33	100.966				7181	8811	16432	11818	10879	7609		12600	14086		4948		8043			12381	11703	7255	7886	8243	7579	8817	9557	10130	13733	12512	12645	6	VGAVAAATS		PEP_FRAG_1	636	644	b3b4b5b6b7b8b9y2y4∞y6y9	11	7.4424	7.4424	0.0002	11	12	746.4054	43462.0
38089	746.3898	38.03	40.21	109.223				2970															4634							2027					19	AWNDIK		PEP_FRAG_1	176	181	b4y6	2	6.1027	7.3748	0.0004	1	5	746.3884	3888.0
38090	746.39	38.62	40.27	40.6206					5047	8142		9960	9960											10181	9751	3502		4618		2450	2589				9	AWNDIK		PEP_FRAG_2	176	181	b4y2y3y4y5y5*	6	7.3748	7.3748	0.0004	3	5	746.3883	12741.0
38099	746.4221	47.57	46.96	39.6973																												13126	16212	13500	29	WNVISK		PEP_FRAG_1	55	60	b1b2b2*b3y2y2∞y3y4y5y5*	10	8.2473	8.2937	0.0000	3	26	746.4227	12479.0
38108	746.3966	37.25	39.16	107.578				9841	9469	7799	10255	10750	8650	3288	4866	5302	7253	6629		8756	6613	7178	8674	9037	9102	13484	12984	13189	5014						6	DEELLK		PEP_FRAG_1	858	863	b2b3b4y1y3y4y5y6	8	7.7109	7.7109	0.0000	7	7	746.3969	21882.0
38110	745.4268	55.45	57.22	43.716					1673		1997	2098			2135			3410	2948	2488					2695	2239	2128								8	ETGGILR		PEP_FRAG_1	291	297	y5	1	5.3716	5.3716	0.0020	2	2	745.4252	1247.0
38122	746.389	53.14	54.33	41.924													1006																		13	TEILDR		PEP_FRAG_1	404	409	y3∞	1	4.87	6.0155	0.0015	1	8	746.389	1006.0
38140	745.4435	50.98	51.78	110.909	5506	4795	4763			4122	2936	2753	5517				5185	3994	7825			4994					2450			2645					15	KEIDIK		PEP_FRAG_1	191	196	b2b2∞b3b6y3y3∞y4y4∞y6	9	7.6416	7.6416	0.0000	1	2	745.4448	7543.0
38146	745.4651	51.18	52.81	41.7723				6877	5890	6917	4478	4670	5523	11398	11468	8520		12190	7885	10335	8933		11885	12526	12339	12127	12173	13428	4967	5431	4927				17	LMVALAK		PEP_FRAG_1	170	176	b3b4b5y2y3y4y5y6	8	8.0872	8.2545	0.0000	17	22	745.4671	16638.0
38148	745.4612	51.52	52.75	117.697													2033																		13	LMVALAK		PEP_FRAG_1	170	176	b3y4	2	6.5548	8.2545	0.0000	1	22	745.4612	2033.0
38153	746.4044	67.13	68.46	106.785						3100		1890	5716				2382			2349	4459	4367	2822	2028	2531	2003	1812		1783	1868			1577		17	ELLDTR		PEP_FRAG_1	175	180	y4y6	2	5.8385	6.2432	0.0013	1	2	746.4032	7261.0
38155	746.3895	40.99	42.32	107.582																			2223		2580	2470	2226	2261	2660	2422	2064	2163	2565	2405	23	EELIDK		PEP_FRAG_2	811	816	y4y6	2	6.085	6.1196	0.0015	2	4	746.3901	1434.0
38165	746.4209	51.03	52.39	111.319				8114	7635	7546	6450	6244	7874		5915		5611	5863	7474	8582	10415	10651	7945	6928	6211	8363	8129	6470	7560	7699	5860	6695	7489	7982	13	NIVAAMK		PEP_FRAG_1	93	99	b3*y7	2	5.1535	7.6353	0.0000	1	17	746.421	3664.0
38167	745.4483	36.0	37.67	44.7931	5792	6645		22826	21422			19810		11360				56700								31974	30130	29148	19793	16844	17495				14	TLAEIAK		PEP_FRAG_1	120	126	b2b3b4b5b5∞y2y3y4y4∞y5y6	11	8.3004	8.3004	0.0000	12	29	745.4491	35172.0
38169	745.4464	36.82	38.17	106.855	125731	125197	164466	51283	50915	55473	75329	64977	66566	13831	13570		88613	84334	130722	67616	78097	70536	96633	96545	92243	105561	97467	95810	53569	53061	52888	42093	47027	46237	6	LEGVVTK		PEP_FRAG_1	685	691	b4b5b5∞b6y2y3y7	7	6.7336	6.7336	0.0011	7	7	745.4473	154471.0
38170	745.4574	35.99	38.04	117.15				9957	9707		15825		15538	6281	11941	12531				4420		3595	23743	24817	22403				14966						20	LASSVLR		PEP_FRAG_1	10	16	b5b5∞b7y4y5y5∞y6y6∞	8	7.7605	7.9474	0.0000	4	10	745.4579	26237.0
38175	745.452	36.39	38.07	41.1862						23739	13858		12564							5700						9631	9669	10232		13701	11377				6	LASSVLR		PEP_FRAG_1	10	16	b4∞b5b5∞b7y1y2y3y4y5y6y6∞	11	7.9474	7.9474	0.0000	6	10	745.4569	68303.0
38177	745.4493	39.08	38.26	45.0			1296																												3	TLAEIAK		PEP_FRAG_1	120	126	y5y6	2	5.2959	8.3004	0.0000	1	29	745.4493	1296.0
38195	746.4214	44.73	46.43	39.7155				9758	10529	9036	11161	12322	9964	15129	21744	21992		13642	10496	11894	10866	12078	12355	13687	13009	14312	16161	15299	10395	12294	12612				12	WNVISK		PEP_FRAG_1	55	60	b1b2b2*b3b3*y2y2∞y3y4y5	10	8.2937	8.2937	0.0000	22	26	746.4215	23382.0
38198	746.4244	40.97	40.81	114.221						2105									1333													3946	4377	5275	28	NIVAAMK		PEP_FRAG_1	93	99	b2b3b4y4y7	5	7.1539	7.6353	0.0000	3	17	746.4257	2622.0
38204	746.4428	29.55	28.58	39.2647	22145	27111	19626																									13766	13640	14471	30	ISVAAASK		PEP_FRAG_1	133	140	y2y3y4y5y6y7y7∞	7	7.9245	7.9245	0.0000	6	7	746.4434	11865.0
38216	746.4575	57.86	57.57	42.206																												3258	2916	4559	28	LFLPTR		PEP_FRAG_1	323	328	y3y5	2	6.8413	7.2518	0.0005	3	24	746.4578	2182.0
38221	746.5189	80.04	81.81	43.9688				19667	18912		16161	15934		7643	9789	10999		12202	13417	13592			14265	13572	12700	13300	14762	15149	12556	12799	12133				23	LLLFLK		PEP_FRAG_1	135	140	b2b3y2y3y4y5	6	7.2647	7.5326	0.0001	2	4	746.5168	8766.0
38223	746.5174	81.22	81.68	119.287						4423			3833				2303				4305	4024													18	LLLFLK		PEP_FRAG_1	136	141	b2b3b4y3y4y6	6	7.5326	7.5326	0.0001	1	4	746.5173	6083.0
38246	747.4154	31.37	30.49	39.446																												8263	5844	8943	28	VGGPVYR		PEP_FRAG_1	452	458	y3y4y6	3	7.0821	7.0821	0.0006	3	7	747.4157	6453.0
38249	747.3333	34.26	34.26	102.155						14674																									6	HIDAEY		PEP_FRAG_1	427	432	b2b3b5y6	4	7.2638	7.4618	0.0001	1	24	747.3333	14674.0
38250	747.3884	29.47	32.14	40.294								1863				2631		4053																	14	AAEELSK		PEP_FRAG_1	42	48	y4	1	5.4201	6.7711	0.0011	1	2	747.3871	2007.0
38257	747.4172	31.92	31.31	42.6427		40417	69489																												3	MNLLTR		PEP_FRAG_1	546	551	b5b5*y1y3	4	5.2983	7.3178	0.0005	1	15	747.4174	8336.0
38276	747.3904	28.33	30.79	109.687				34697	31033		35992	35502	31127	10227	35848	37333	30322	25334	21317	17154	10278	6699	14835	15296	10908				10420						9	AAEELSK		PEP_FRAG_1	42	48	b4b4∞b5b6b7b7∞y2y7	8	6.7711	6.7711	0.0011	1	2	747.3902	27930.0
38282	746.52	81.92	82.53	118.752																												4391	4904	5030	28	LLLFLK		PEP_FRAG_1	135	140	b2b3b4y2y3y4y6	7	7.5242	7.5326	0.0001	1	4	746.5196	3587.0
38290	747.438	33.49	35.74	112.423				4380	4128		8861	6718	7564	4329	7621	9760				3376	3006		8765	11217	8562	2163	1917		9042	5966	5460				20	ATLSSIR		PEP_FRAG_1	88	94	y4y5	2	7.1984	7.1984	0.0005	3	5	747.4394	11392.0
38293	747.4366	36.29	35.74	41.617									2600																						9	ATLSSIR		PEP_FRAG_1	88	94	b6y4	2	6.5573	7.1984	0.0005	1	5	747.4366	2600.0
38314	747.4242	32.37	34.15	109.319				2660	2160	2797		1869	3419						2991	3829	3737	3989	5259		6046	3819	3295	3837	3553	2704		3950		4160	25	EKETLK		PEP_FRAG_1	553	558	b3b4y6	3	5.6447	5.6447	0.0018	3	3	747.4243	2128.0
38317	747.3906	34.59	36.13	108.615	13944	11131	11521	44412	36316	61655	48822	40964	64857	11068	14841	15768	29517	27336	40947	60029	67857	62361	89898	87785	89402	72370	75095	83529	60964	50196	51260	46874	62066	57898	18	ESSLPSK		PEP_FRAG_1	324	330	b2b4b4∞b5b6b6∞b7∞y1y2y2∞y3y3∞y7	13	7.2954	7.2954	0.0005	4	4	747.3888	106365.0
38324	747.4002	32.41	34.55	108.937				2991	3131	3548	2571		4597				11050	3976					4263	4452	4427	4170	4125	4052	2979	2400	2667				9	QLPDFK		PEP_FRAG_2	473	478	y4y6	2	6.2189	6.2189	0.0013	2	3	747.4004	3020.0
38341	747.4632	35.04	36.75	113.5				193231	191096	138671	204644	187114	171137	134377	185441	174841	124861	157252	111749	240929	114308	174179	207679	224473	218412	187437	178018	182255	176434	171267	158315	199724	203061	185887	21	TLVSVTK		PEP_FRAG_1	540	546	b2b2∞b3b4b4∞b5b5∞b6b6∞b7y1y2y2∞y3y4y4∞y5y5∞y6	19	9.6013	9.6013	0.0000	27	30	747.463	249963.0
38342	747.4642	37.22	36.69	40.751									74243																						9	SLLSVTK		PEP_FRAG_1	440	446	b3y2y2∞y3y3∞y4	6	7.3222	7.3222	0.0005	1	2	747.4642	74243.0
38345	747.4065	46.26	47.98	43.0138					1601										3937	1615		3281						1508							16	QPDLFK		PEP_FRAG_1	755	760	y5	1	6.8562	6.8562	0.0011	1	4	747.4053	1370.0
38350	747.4086	43.63	45.72	41.8095							2811									3770						3307	3624								16	MQDLLK		PEP_FRAG_1	119	124	b5∞y5	2	4.6992	5.4468	0.0020	1	3	747.4077	3362.0
38357	746.4579	55.39	56.99	42.2329				4108	3970	3416	3415	3280	5010	3373	4013	5237		2600	3153	4170		3961	3441	3476	3580	5614	3978		2583	2790	2720				18	LFLPTR		PEP_FRAG_1	323	328	y3y4y5	3	7.2518	7.2518	0.0005	21	24	746.4563	6386.0
38359	746.4479	61.84	63.54	43.9387				10489	8411		8397	8539		2749	3619	4051		6348	5430	9026			8589	5738		8308	7232	7435	8165	7285	7639				16	IEIPFK		PEP_FRAG_1	370	375	b3b4y3y4y5	5	6.8018	6.8018	0.0011	4	4	746.4484	9628.0
38364	747.4051	51.88	51.41	105.32																												1584	2179	2026	28	QPDLFK		PEP_FRAG_1	755	760	b3y6	2	5.7837	6.8562	0.0011	1	4	747.4051	1057.0
38371	747.3662	31.49	33.82	105.773							4621	4809	6707					2605		5917	8199	9228	5866	5127	6583	7921	7185	7443	3468	2375	2658				23	SNEELR		PEP_FRAG_1	1218	1223	b4y2y6	3	6.0779	6.0779	0.0015	1	2	747.3648	5141.0
38372	747.4226	50.03	51.72	115.095				4695	5068	5365		3128												4318	4972		4013				3922				20	MNLLTR		PEP_FRAG_1	546	551	y3∞	1	6.0825	7.3178	0.0005	1	15	747.4232	3459.0
38375	746.4823	57.54	57.19	42.6407																												1804	1923	3241	28	LLLYPK		PEP_FRAG_1	699	704	y2y3	2	6.0469	6.6624	0.0011	1	8	746.4825	1208.0
38377	747.4526	47.63	49.48	44.8937				4734	4191		2649	2572		3645				3375								2141	1880	1838	2174	2244	2306				5	IQAFIR		PEP_FRAG_1	842	847	y4y5	2	6.7253	6.7253	0.0011	6	8	747.4532	2661.0
38380	747.4406	41.64	43.12	40.8935				6795	5507	4654	5203	5622	5161	5266	4628	5818		4172	3847	5618	4910	4093	5820	7130	6230	5787	6099	5899	6301	5645	5635	5759	6323	7404	20	LGVAYPK		PEP_FRAG_1	116	122	y2y3y4y6	4	6.9887	6.9887	0.0007	11	12	747.4399	6784.0
38399	746.4836	55.02	56.66	42.8339				1643	1966				1782							3538	2850		1569	1766	1765	2217	1886	1785							17	LLLYPK		PEP_FRAG_1	699	704	b3y1y2y3	4	6.6624	6.6624	0.0011	3	8	746.4808	3773.0
38402	746.4836	56.69	56.69	123.323						2518																									6	LLLYPK		PEP_FRAG_1	699	704	y2y3	2	6.1764	6.6624	0.0011	1	8	746.4836	2518.0
38409	747.4417	55.72	55.36	112.2																												6340	6612	7354	28	GFPVLSK		PEP_FRAG_1	242	248	b3b4b5y3y5y7	6	7.4397	7.6883	0.0000	2	25	747.4424	4537.0
38417	747.4051	69.4	69.56	109.141																												4289	4016	4932	29	QPDLFK		PEP_FRAG_1	755	760	y2y3y6	3	5.6697	6.8562	0.0011	1	4	747.4049	2663.0
[truncated: 52,867 more rows]
[truncated: 22 more columns]
